# Supplementary material for: Siloxane-containing phosphine (oxide) ligands for enhanced catalytic activity of cobalt complexes for hydrosilylation reactions
Source: Royal Society of Chemistry journal article supplement (doi:10.1039/d4ob00333k), 2024-01-01

## checkCIF/PLATON report

Structure factors have been supplied for datablock(s) mo221108a\_sq

THIS REPORT IS FOR GUIDANCE ONLY. IF USED AS PART OF A REVIEW PROCEDURE FOR PUBLICATION, IT SHOULD NOT REPLACE THE EXPERTISE OF AN EXPERIENCED CRYSTALLOGRAPHIC REFEREE.

No syntax errors found.      CIF dictionary      Interpreting this report

### Datablock: mo221108a\_sq

---

Bond precision:      C-C = 0.0153 Å      Wavelength=0.71073

Cell:                      a=11.184(3)                      b=19.316(6)                      c=23.366(7)  
                             alpha=83.286(7)                      beta=84.457(7)                      gamma=75.853(6)  
Temperature:              296 K

|                        | Calculated                             | Reported                |
|------------------------|----------------------------------------|-------------------------|
| Volume                 | 4849(2)                                | 4849(3)                 |
| Space group            | P -1                                   | P -1                    |
| Hall group             | -P 1                                   | -P 1                    |
| Moiety formula         | C47 H43 Cl2 Ni O2 P2 Si [+<br>solvent] | C47 H43 Cl2 Ni O2 P2 Si |
| Sum formula            | C47 H43 Cl2 Ni O2 P2 Si [+<br>solvent] | C47 H43 Cl2 Ni O2 P2 Si |
| Mr                     | 859.43                                 | 859.45                  |
| Dx, g cm <sup>-3</sup> | 1.177                                  | 1.177                   |
| Z                      | 4                                      | 4                       |
| Mu (mm <sup>-1</sup> ) | 0.634                                  | 0.634                   |
| F000                   | 1788.0                                 | 1788.0                  |
| F000'                  | 1792.18                                |                         |
| h, k, lmax             | 13, 23, 28                             | 13, 23, 28              |
| Nref                   | 18061                                  | 18055                   |
| Tmin, Tmax             | 0.941, 0.963                           | 0.886, 1.000            |
| Tmin'                  | 0.939                                  |                         |

Correction method= # Reported T Limits: Tmin=0.886 Tmax=1.000

AbsCorr = MULTII-SCAN

Data completeness= 1.000

Theta(max)= 25.497

R(reflections)= 0.0869( 5659)

wR2(reflections)=  
0.2429( 18055)

S = 0.839

Npar= 969

The following ALERTS were generated. Each ALERT has the format

**test-name\_ALERT\_alert-type\_alert-level.**

Click on the hyperlinks for more details of the test.

---

### ● Alert level B

RINTA01\_ALERT\_3\_B The value of Rint is greater than 0.18

Rint given 0.185

|                   |                                                  |         |        |
|-------------------|--------------------------------------------------|---------|--------|
| PLAT020_ALERT_3_B | The Value of Rint is Greater Than 0.12 .....     | 0.185   | Report |
| PLAT026_ALERT_3_B | Ratio Observed / Unique Reflections (too) Low .. | 31%     | Check  |
| PLAT241_ALERT_2_B | High 'MainMol' Ueq as Compared to Neighbors of   | C2      | Check  |
| PLAT241_ALERT_2_B | High 'MainMol' Ueq as Compared to Neighbors of   | C50     | Check  |
| PLAT241_ALERT_2_B | High 'MainMol' Ueq as Compared to Neighbors of   | C61     | Check  |
| PLAT331_ALERT_2_B | Small Aver Phenyl C-C Dist C65 --C70 .           | 1.36    | Ang.   |
| PLAT341_ALERT_3_B | Low Bond Precision on C-C Bonds .....            | 0.01528 | Ang.   |

---

### ● Alert level C

|                   |                                                 |                             |        |        |
|-------------------|-------------------------------------------------|-----------------------------|--------|--------|
| PLAT213_ALERT_2_C | Atom C50                                        | has ADP max/min Ratio ..... | 3.1    | prolat |
| PLAT220_ALERT_2_C | NonSolvent Resd 1 C                             | Ueq(max)/Ueq(min) Range     | 5.1    | Ratio  |
| PLAT220_ALERT_2_C | NonSolvent Resd 2 C                             | Ueq(max)/Ueq(min) Range     | 5.9    | Ratio  |
| PLAT222_ALERT_3_C | NonSolvent Resd 1 H                             | Uiso(max)/Uiso(min) Range   | 4.7    | Ratio  |
| PLAT222_ALERT_3_C | NonSolvent Resd 2 H                             | Uiso(max)/Uiso(min) Range   | 5.9    | Ratio  |
| PLAT241_ALERT_2_C | High 'MainMol' Ueq as Compared to Neighbors of  | C14                         | Check  |        |
| PLAT241_ALERT_2_C | High 'MainMol' Ueq as Compared to Neighbors of  | C16                         | Check  |        |
| PLAT241_ALERT_2_C | High 'MainMol' Ueq as Compared to Neighbors of  | C17                         | Check  |        |
| PLAT241_ALERT_2_C | High 'MainMol' Ueq as Compared to Neighbors of  | C26                         | Check  |        |
| PLAT241_ALERT_2_C | High 'MainMol' Ueq as Compared to Neighbors of  | C49                         | Check  |        |
| PLAT241_ALERT_2_C | High 'MainMol' Ueq as Compared to Neighbors of  | C60                         | Check  |        |
| PLAT241_ALERT_2_C | High 'MainMol' Ueq as Compared to Neighbors of  | C87                         | Check  |        |
| PLAT241_ALERT_2_C | High 'MainMol' Ueq as Compared to Neighbors of  | C88                         | Check  |        |
| PLAT241_ALERT_2_C | High 'MainMol' Ueq as Compared to Neighbors of  | C91                         | Check  |        |
| PLAT241_ALERT_2_C | High 'MainMol' Ueq as Compared to Neighbors of  | C93                         | Check  |        |
| PLAT242_ALERT_2_C | Low 'MainMol' Ueq as Compared to Neighbors of   | Si1                         | Check  |        |
| PLAT242_ALERT_2_C | Low 'MainMol' Ueq as Compared to Neighbors of   | C1                          | Check  |        |
| PLAT242_ALERT_2_C | Low 'MainMol' Ueq as Compared to Neighbors of   | C5                          | Check  |        |
| PLAT242_ALERT_2_C | Low 'MainMol' Ueq as Compared to Neighbors of   | C12                         | Check  |        |
| PLAT242_ALERT_2_C | Low 'MainMol' Ueq as Compared to Neighbors of   | C15                         | Check  |        |
| PLAT242_ALERT_2_C | Low 'MainMol' Ueq as Compared to Neighbors of   | Si2                         | Check  |        |
| PLAT242_ALERT_2_C | Low 'MainMol' Ueq as Compared to Neighbors of   | O4                          | Check  |        |
| PLAT242_ALERT_2_C | Low 'MainMol' Ueq as Compared to Neighbors of   | C51                         | Check  |        |
| PLAT242_ALERT_2_C | Low 'MainMol' Ueq as Compared to Neighbors of   | C59                         | Check  |        |
| PLAT242_ALERT_2_C | Low 'MainMol' Ueq as Compared to Neighbors of   | C63                         | Check  |        |
| PLAT242_ALERT_2_C | Low 'MainMol' Ueq as Compared to Neighbors of   | C65                         | Check  |        |
| PLAT242_ALERT_2_C | Low 'MainMol' Ueq as Compared to Neighbors of   | C83                         | Check  |        |
| PLAT242_ALERT_2_C | Low 'MainMol' Ueq as Compared to Neighbors of   | C89                         | Check  |        |
| PLAT369_ALERT_2_C | Long C(sp2)-C(sp2) Bond C2 - C5 .               | 1.54                        | Ang.   |        |
| PLAT906_ALERT_3_C | Large K Value in the Analysis of Variance ..... | 16.507                      | Check  |        |
| PLAT906_ALERT_3_C | Large K Value in the Analysis of Variance ..... | 4.978                       | Check  |        |
| PLAT906_ALERT_3_C | Large K Value in the Analysis of Variance ..... | 2.740                       | Check  |        |
| PLAT911_ALERT_3_C | Missing FCF Refl Between Thmin & Sth/L= 0.600   | 5                           | Report |        |

---

● **Alert level G**

|                   |                                                  |       |              |
|-------------------|--------------------------------------------------|-------|--------------|
| PLAT003_ALERT_2_G | Number of Uiso or Uij Restrained non-H Atoms ... | 6     | Report       |
| PLAT177_ALERT_4_G | The CIF-Embedded .res File Contains DELU Records | 4     | Report       |
| PLAT178_ALERT_4_G | The CIF-Embedded .res File Contains SIMU Records | 5     | Report       |
| PLAT187_ALERT_4_G | The CIF-Embedded .res File Contains RIGU Records | 1     | Report       |
| PLAT395_ALERT_2_G | Deviating X-O-Y Angle From 120 for O1            | 143.1 | Degree       |
| PLAT395_ALERT_2_G | Deviating X-O-Y Angle From 120 for O4            | 145.2 | Degree       |
| PLAT606_ALERT_4_G | Solvent Accessible VOID(S) in Structure .....    | !     | Info         |
| PLAT793_ALERT_4_G | Model has Chirality at P2 (Centro SPGR)          | R     | Verify       |
| PLAT793_ALERT_4_G | Model has Chirality at Si1 (Centro SPGR)         | R     | Verify       |
| PLAT793_ALERT_4_G | Model has Chirality at Si2 (Centro SPGR)         | S     | Verify       |
| PLAT793_ALERT_4_G | Model has Chirality at C3 (Centro SPGR)          | S     | Verify       |
| PLAT793_ALERT_4_G | Model has Chirality at C49 (Centro SPGR)         | R     | Verify       |
| PLAT860_ALERT_3_G | Number of Least-Squares Restraints .....         | 882   | Note         |
| PLAT869_ALERT_4_G | ALERTS Related to the Use of SQUEEZE Suppressed  | !     | Info         |
| PLAT910_ALERT_3_G | Missing # of FCF Reflection(s) Below Theta(Min). | 2     | Note         |
| PLAT933_ALERT_2_G | Number of HKL-OMIT Records in Embedded .res File | 7     | Note         |
| PLAT941_ALERT_3_G | Average HKL Measurement Multiplicity .....       | 2.3   | Low          |
| PLAT961_ALERT_5_G | Dataset Contains no Negative Intensities .....   |       | Please Check |
| PLAT967_ALERT_5_G | Note: Two-Theta Cutoff Value in Embedded .res .. | 51.0  | Degree       |
| PLAT978_ALERT_2_G | Number C-C Bonds with Positive Residual Density. | 0     | Info         |

---

0 **ALERT level A** = Most likely a serious problem - resolve or explain  
8 **ALERT level B** = A potentially serious problem, consider carefully  
33 **ALERT level C** = Check. Ensure it is not caused by an omission or oversight  
20 **ALERT level G** = General information/check it is not something unexpected

0 ALERT type 1 CIF construction/syntax error, inconsistent or missing data  
36 ALERT type 2 Indicator that the structure model may be wrong or deficient  
13 ALERT type 3 Indicator that the structure quality may be low  
10 ALERT type 4 Improvement, methodology, query or suggestion  
2 ALERT type 5 Informative message, check

---

It is advisable to attempt to resolve as many as possible of the alerts in all categories. Often the minor alerts point to easily fixed oversights, errors and omissions in your CIF or refinement strategy, so attention to these fine details can be worthwhile. In order to resolve some of the more serious problems it may be necessary to carry out additional measurements or structure refinements. However, the purpose of your study may justify the reported deviations and the more serious of these should normally be commented upon in the discussion or experimental section of a paper or in the "special\_details" fields of the CIF. checkCIF was carefully designed to identify outliers and unusual parameters, but every test has its limitations and alerts that are not important in a particular case may appear. Conversely, the absence of alerts does not guarantee there are no aspects of the results needing attention. It is up to the individual to critically assess their own results and, if necessary, seek expert advice.

### **Publication of your CIF in IUCr journals**

A basic structural check has been run on your CIF. These basic checks will be run on all CIFs submitted for publication in IUCr journals (*Acta Crystallographica*, *Journal of Applied Crystallography*, *Journal of Synchrotron Radiation*); however, if you intend to submit to *Acta Crystallographica Section C* or *E* or *IUCrData*, you should make sure that full publication checks are run on the final version of your CIF prior to submission.

### **Publication of your CIF in other journals**

Please refer to the *Notes for Authors* of the relevant journal for any special instructions relating to CIF submission.

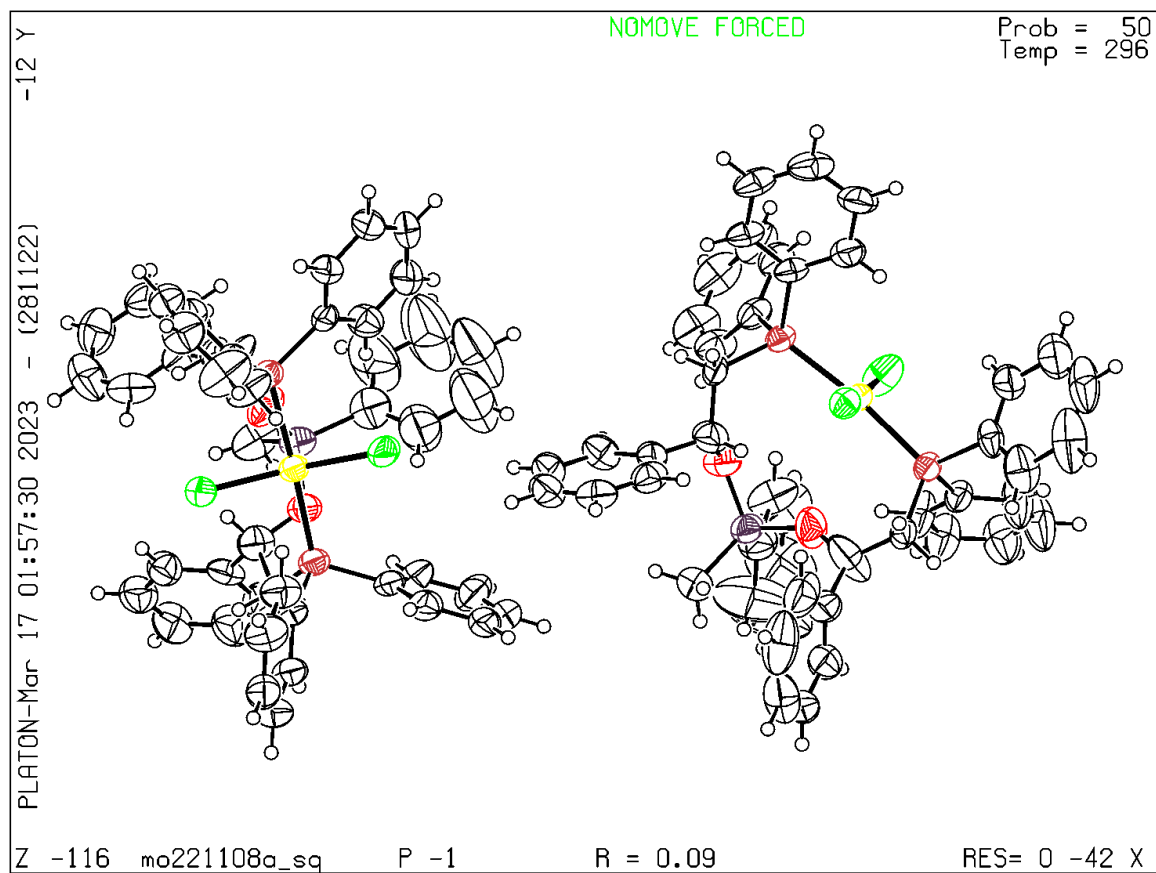

Supplement: d4ob00333k2.zip [file d4ob00333k2.zip]
