# Supplementary material for: Siloxane-containing phosphine (oxide) ligands for enhanced catalytic activity of cobalt complexes for hydrosilylation reactions
Source: Royal Society of Chemistry journal article supplement (doi:10.1039/d4ob00333k), 2024-01-01

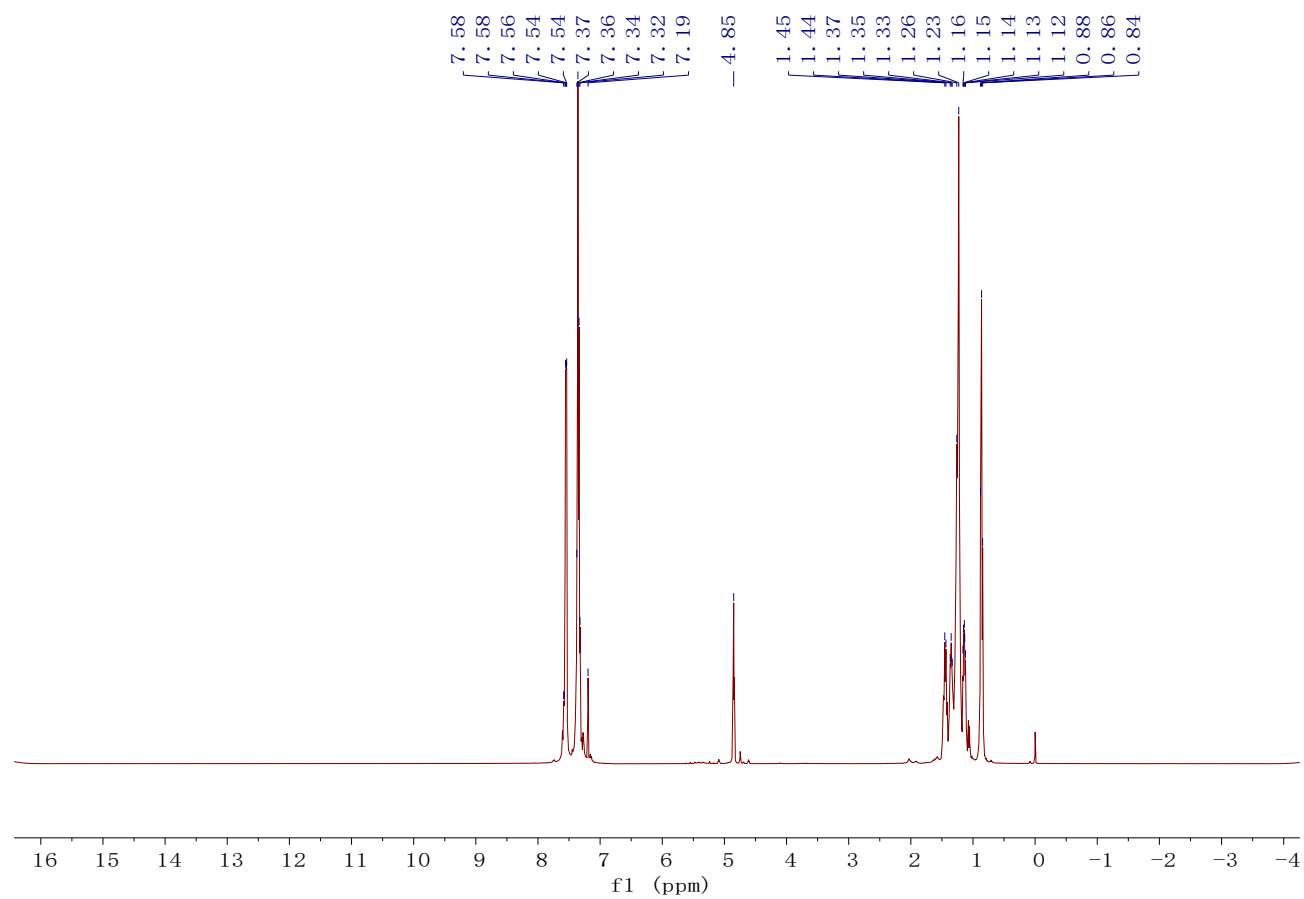

**Fig. S1.** <sup>1</sup>H NMR spectrum of **Octyldiphenylsilane** in CDCl<sub>3</sub>

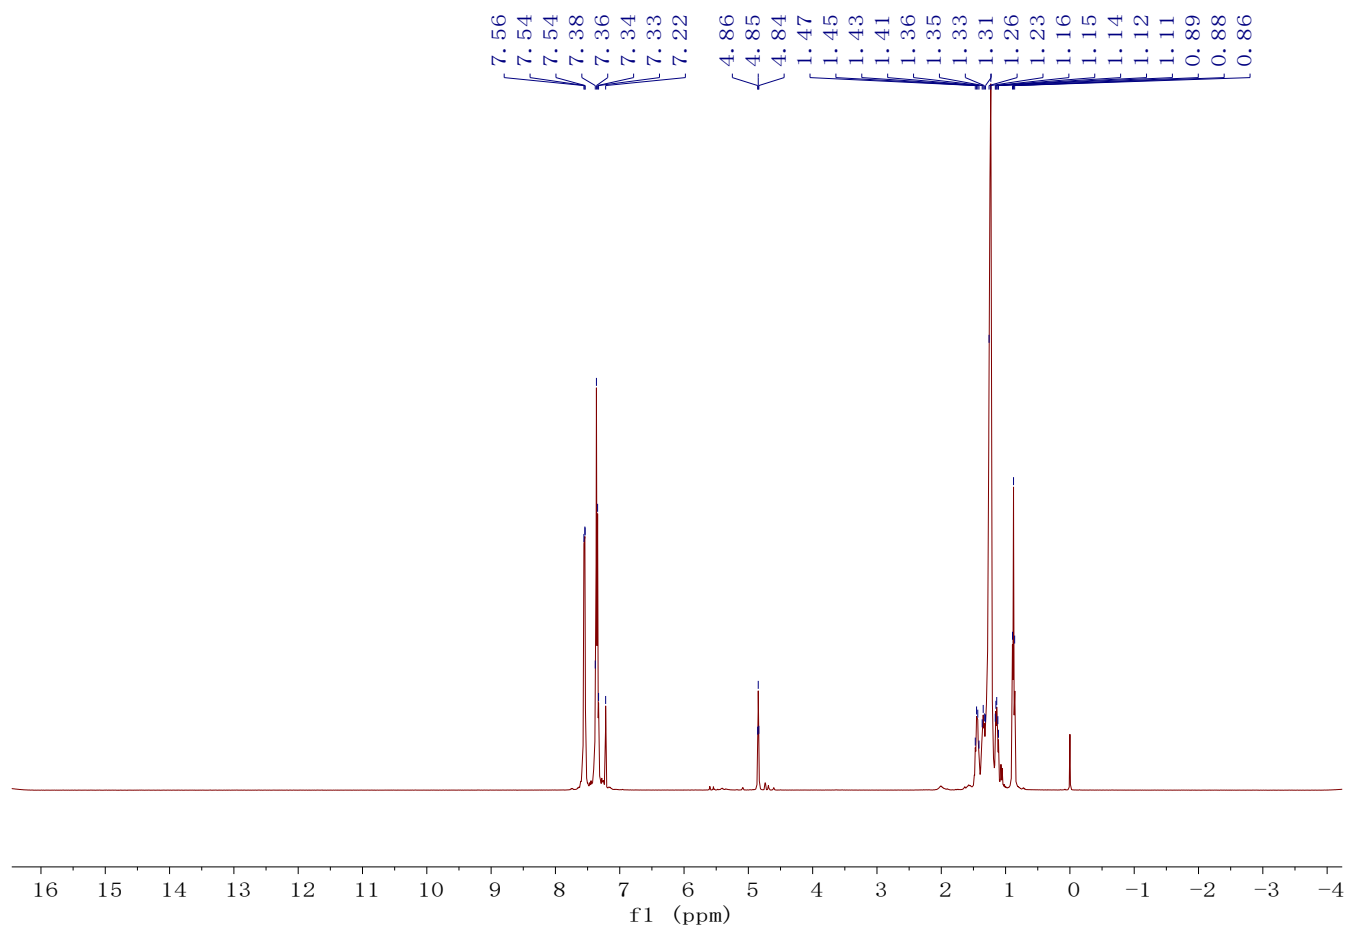

**Fig. S2.**  $^1\text{H}$  NMR spectrum of **Dodecenediphenylsilane** in  $\text{CDCl}_3$

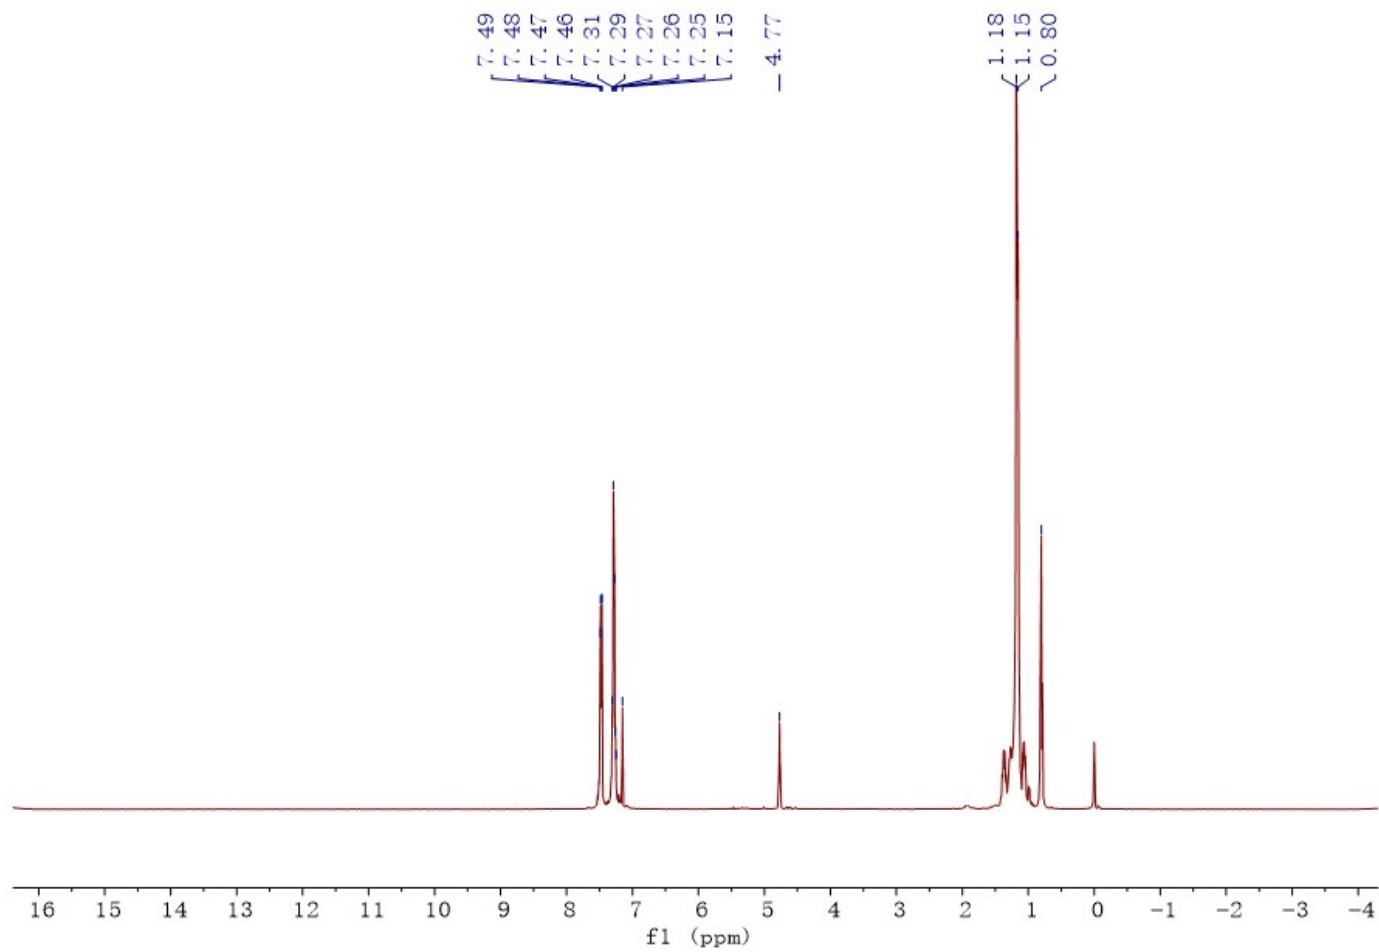

**Fig. S3.**  $^1\text{H}$  NMR spectrum of Tetradecene diphenylsilane in  $\text{CDCl}_3$

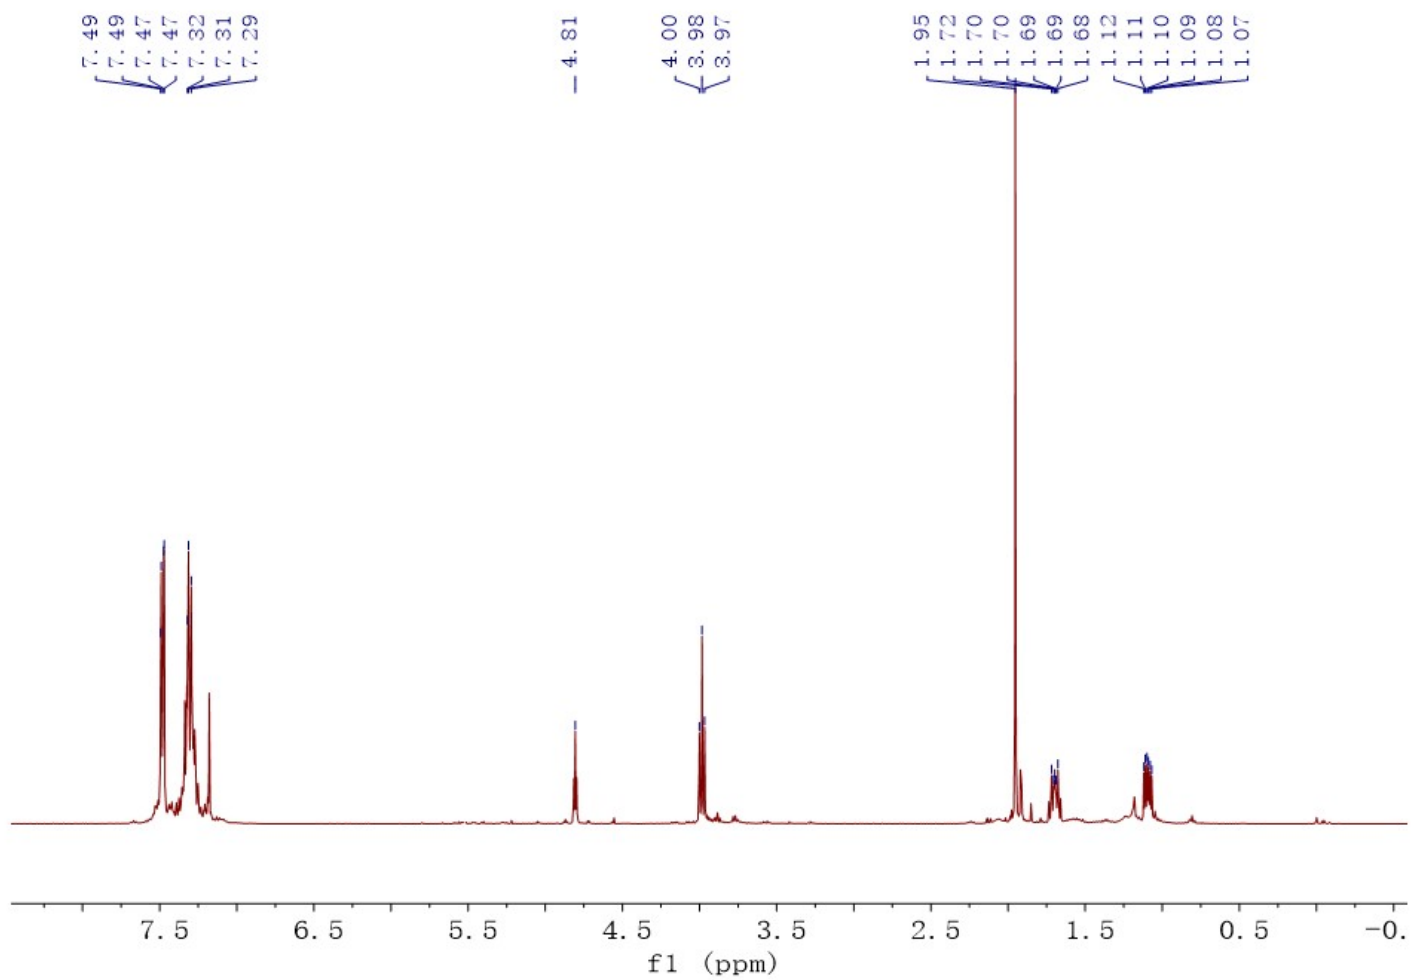

**Fig. S4.**  $^1\text{H}$  NMR spectrum of 3-(diphenylsilyl)propyl acetate in  $\text{CDCl}_3$

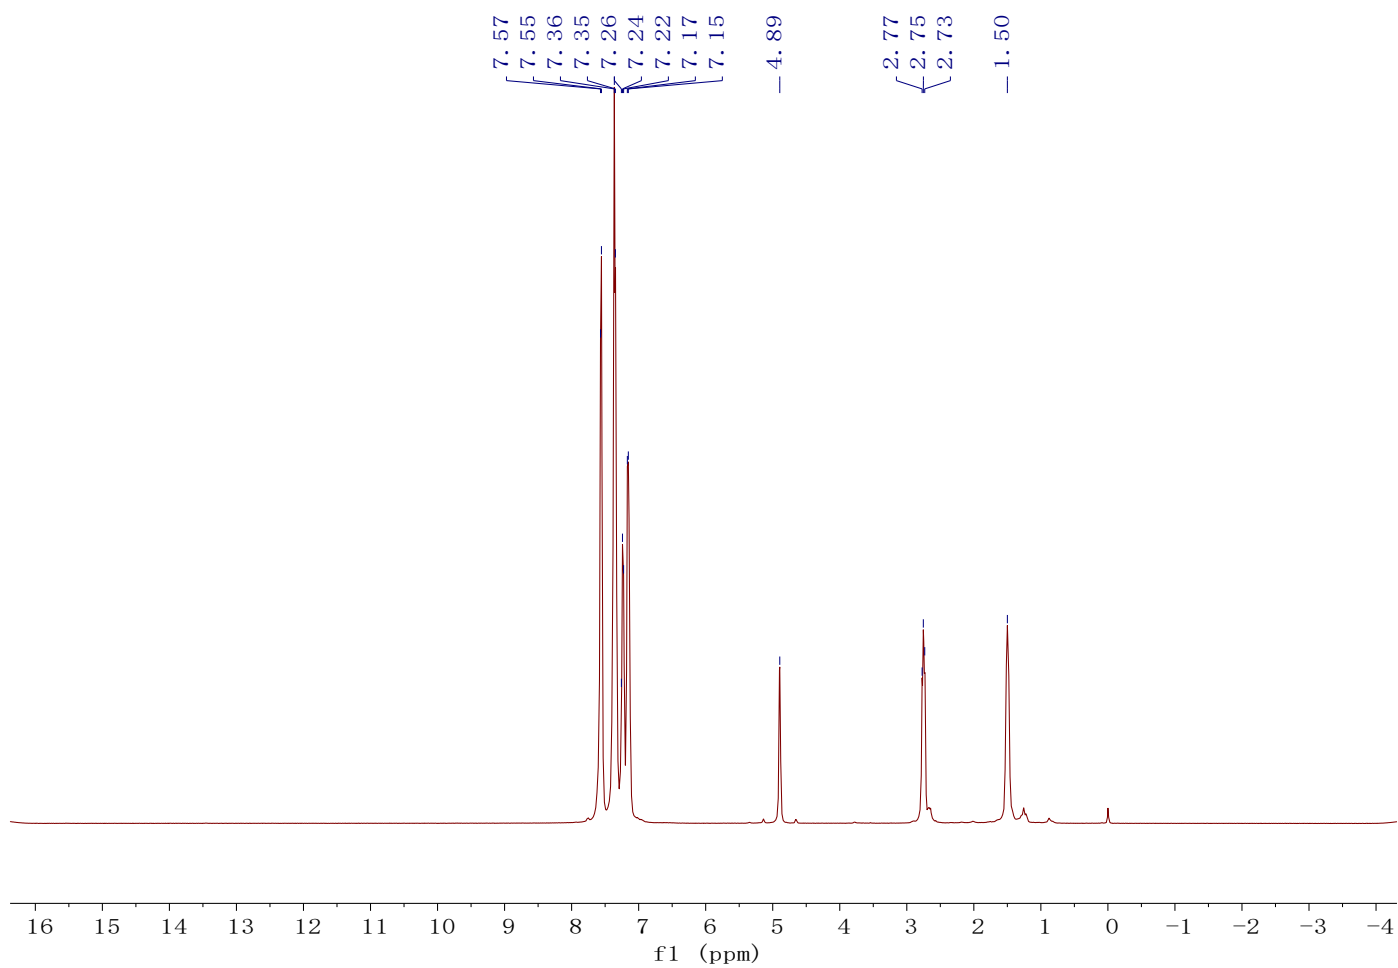

**Fig. S5.**  $^1\text{H}$  NMR spectrum of Phenethyldiphenylsilane in  $\text{CDCl}_3$

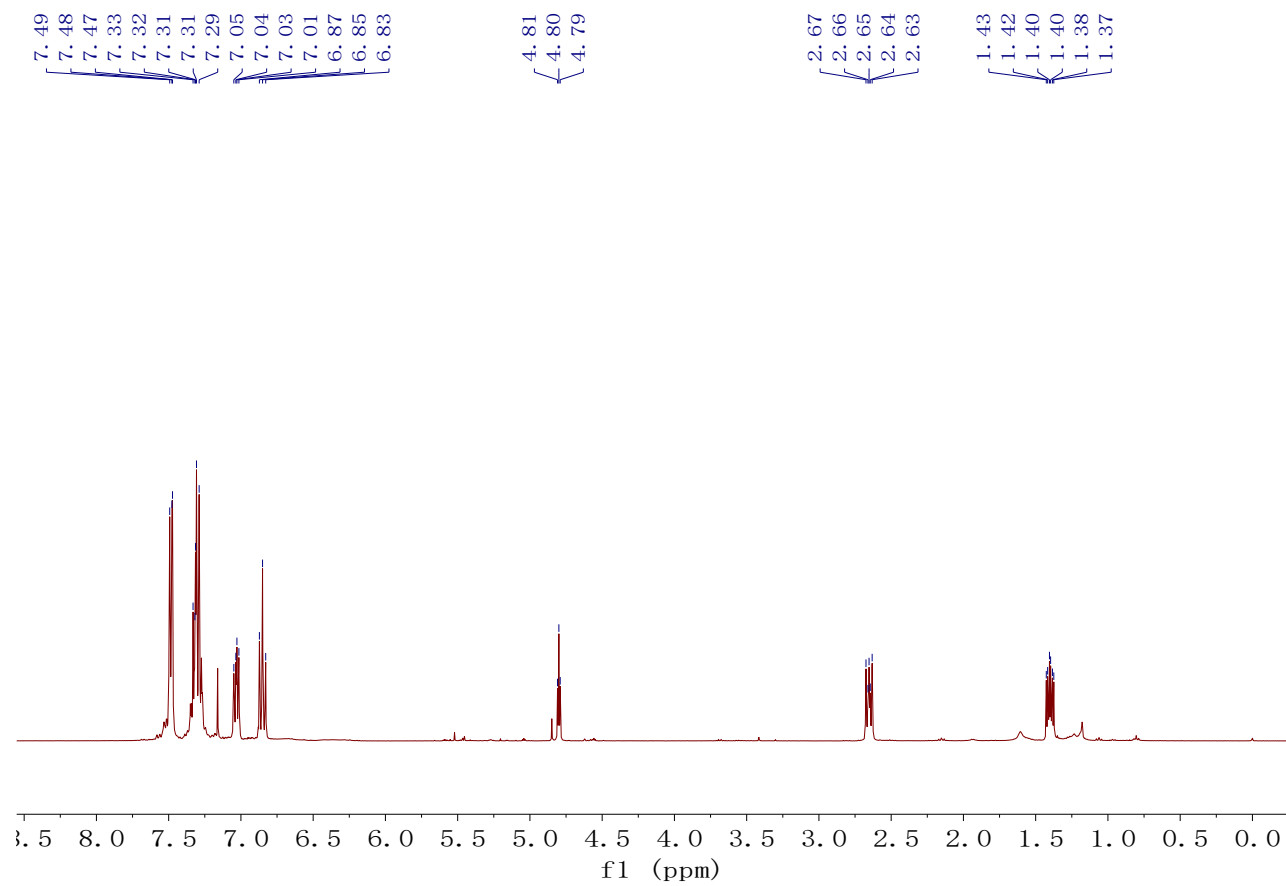

**Fig. S6.** <sup>1</sup>H NMR spectrum of (4-fluorophenethyl)diphenylsilane in CDCl<sub>3</sub>

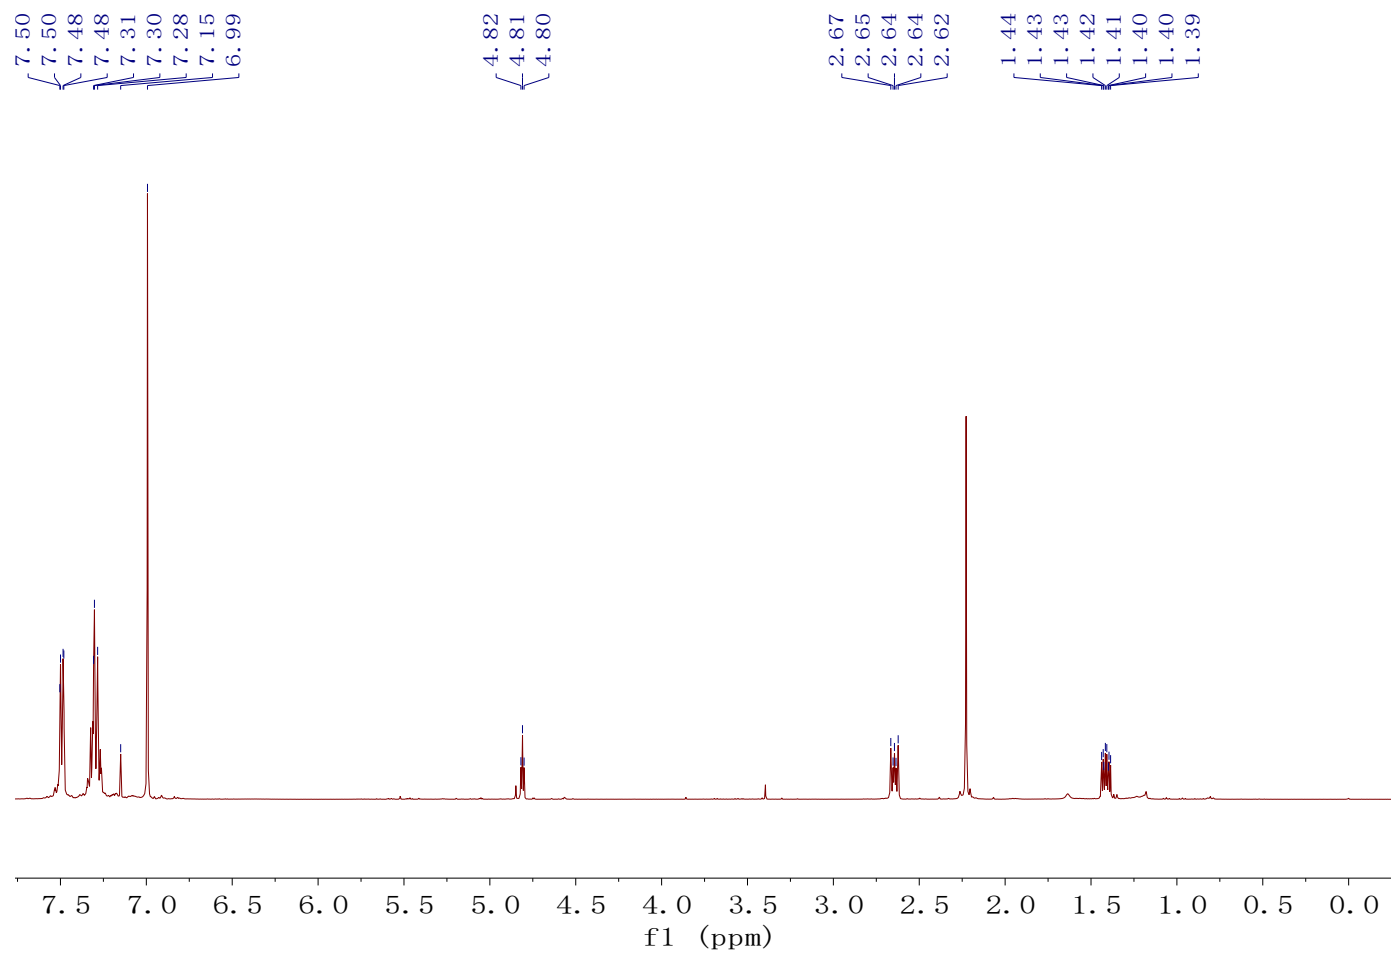

**Fig. S7.**  $^1\text{H}$  NMR spectrum of (4-chlorophenethyl)diphenylsilane in  $\text{CDCl}_3$

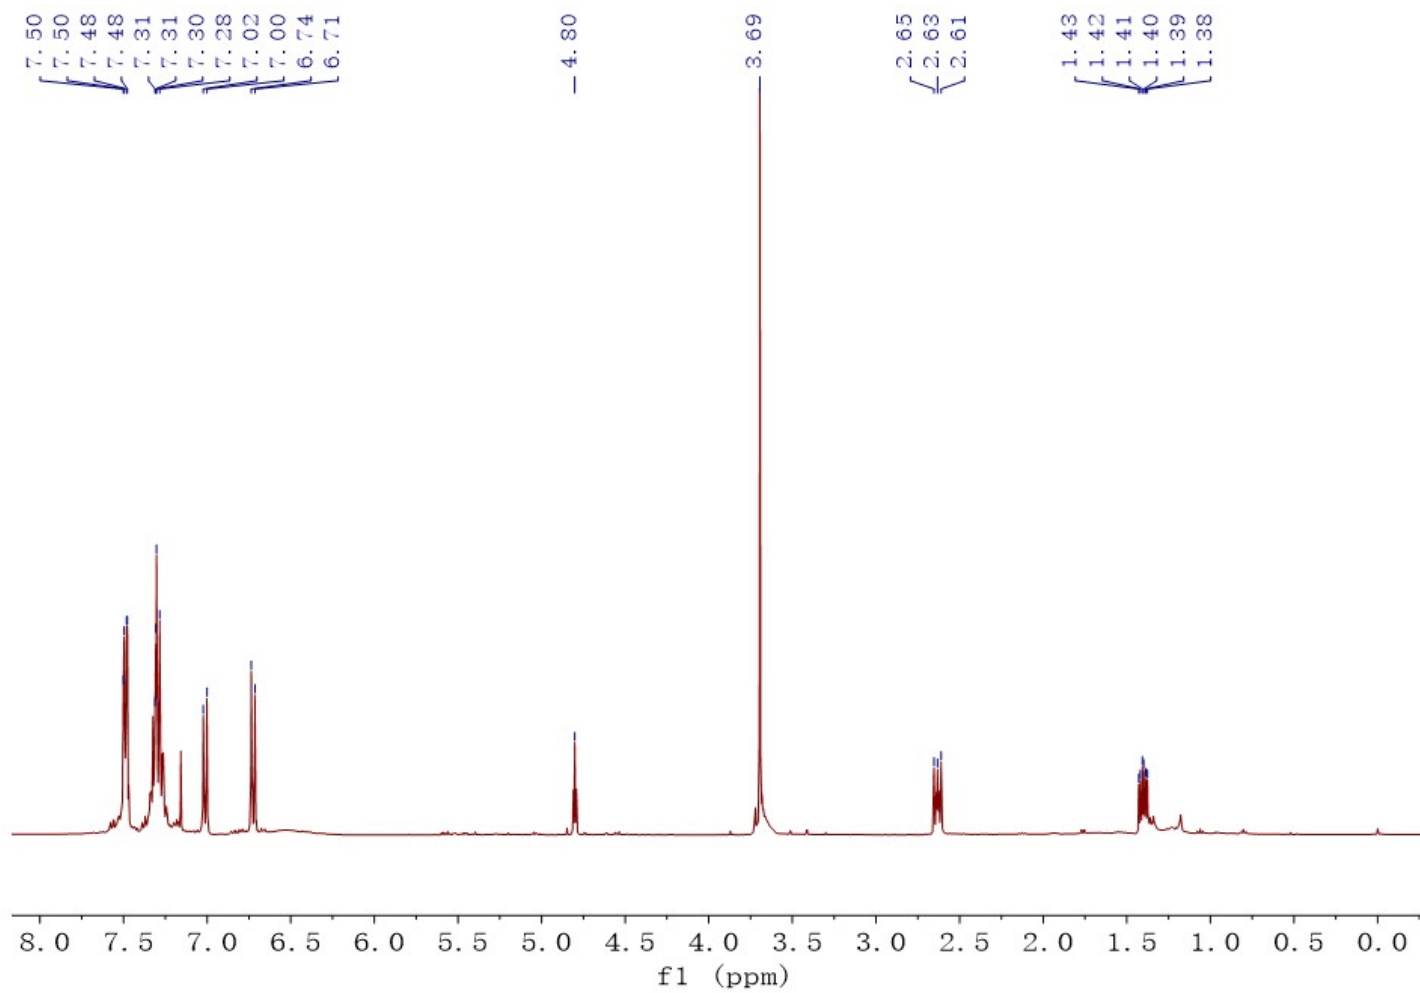

**Fig. S8.**  $^1\text{H}$  NMR spectrum of (4-methoxyphenethyl)diphenylsilane in  $\text{CDCl}_3$



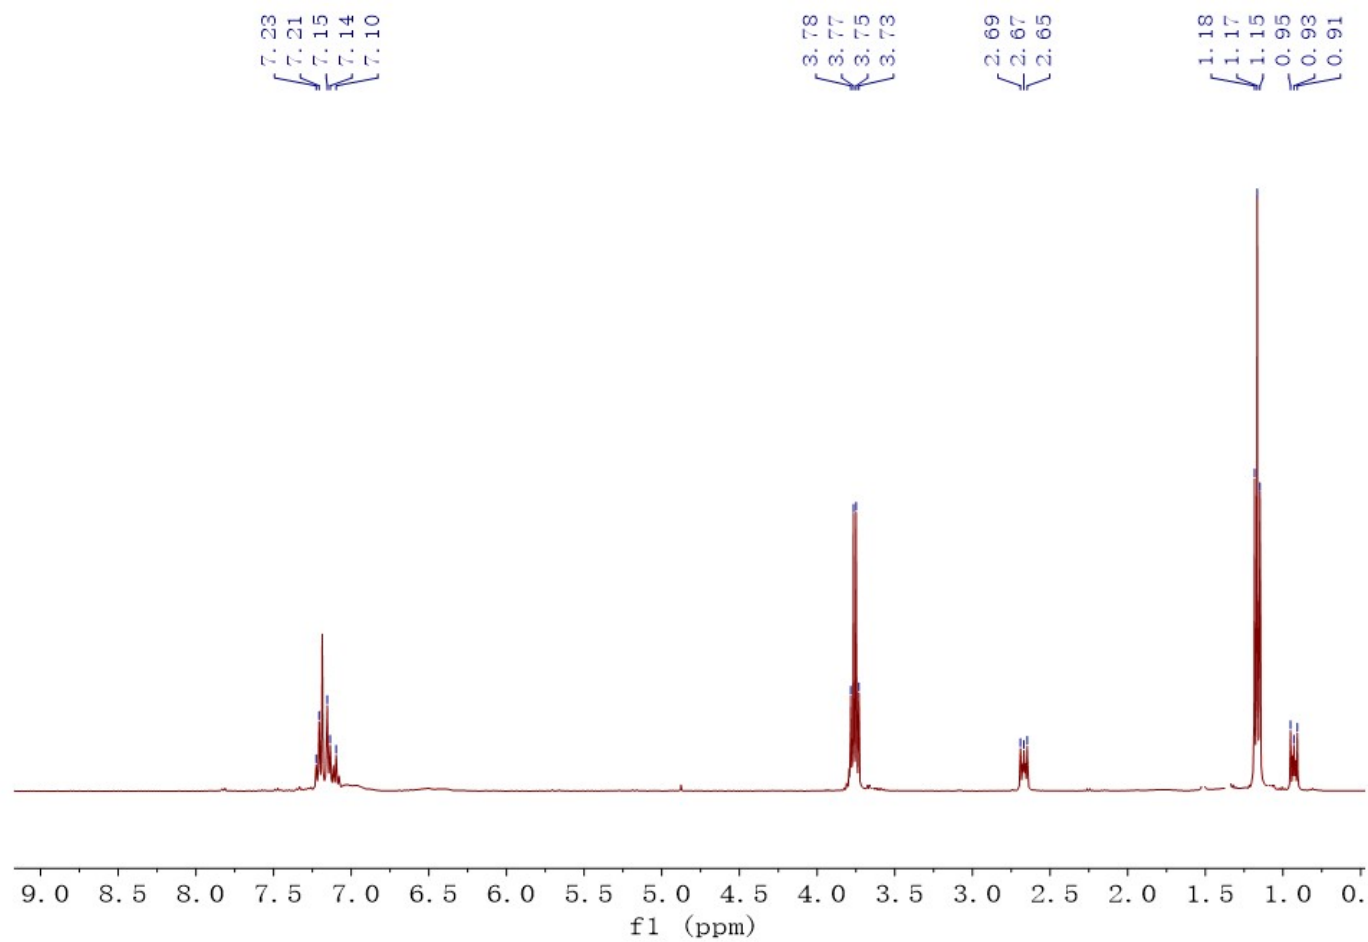

**Fig. S9.**  $^1\text{H}$  NMR spectrum of triethoxy(phenethyl)silane in  $\text{CDCl}_3$

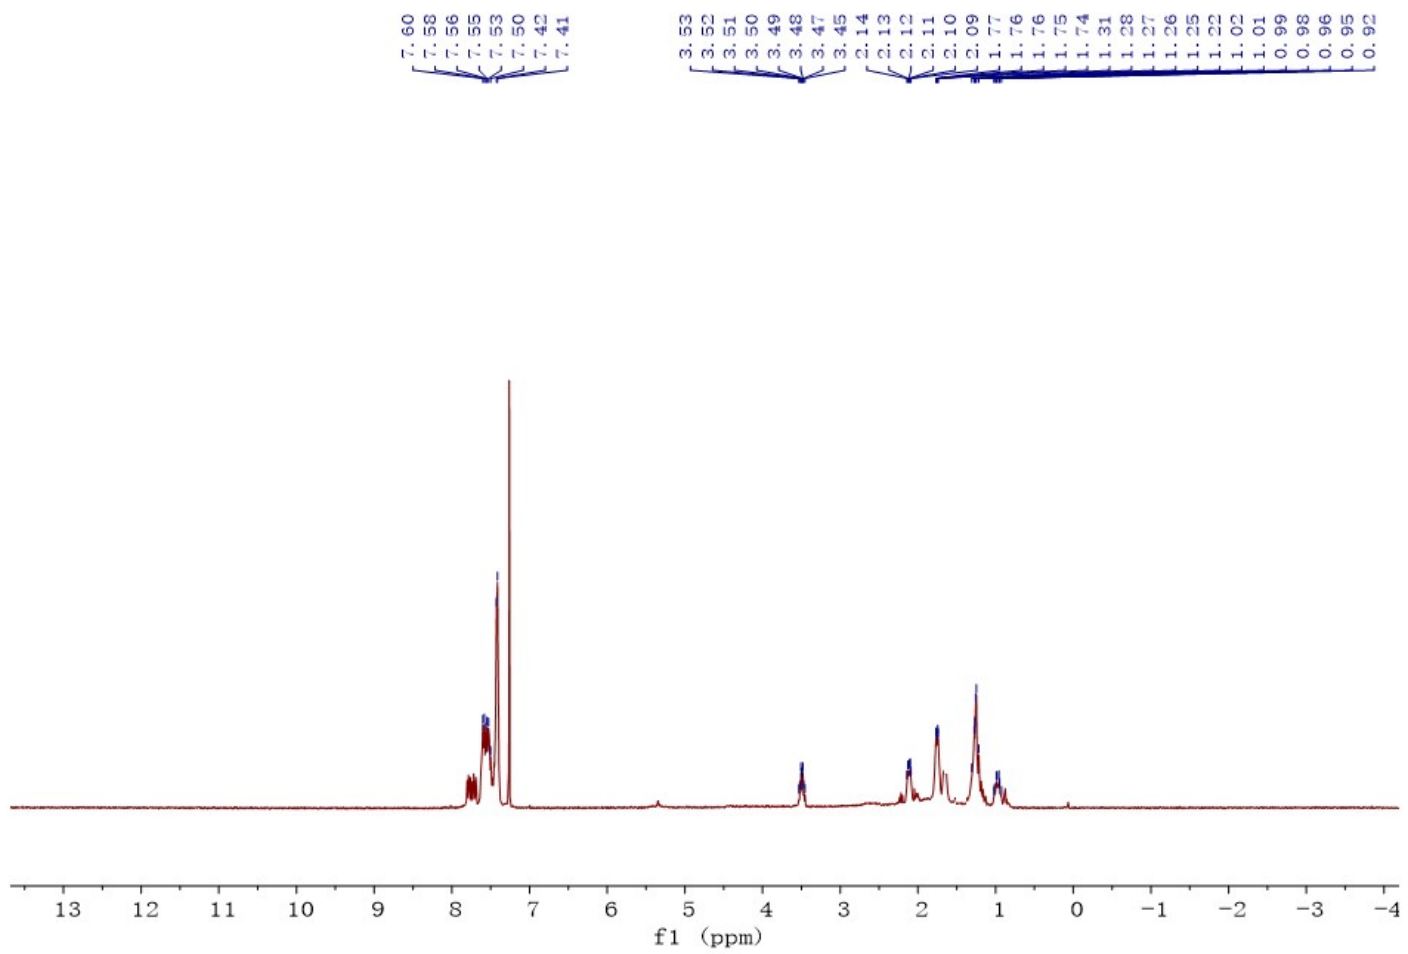

Fig. S10.  $^1\text{H}$  NMR spectrum of **1** in  $\text{CDCl}_3$

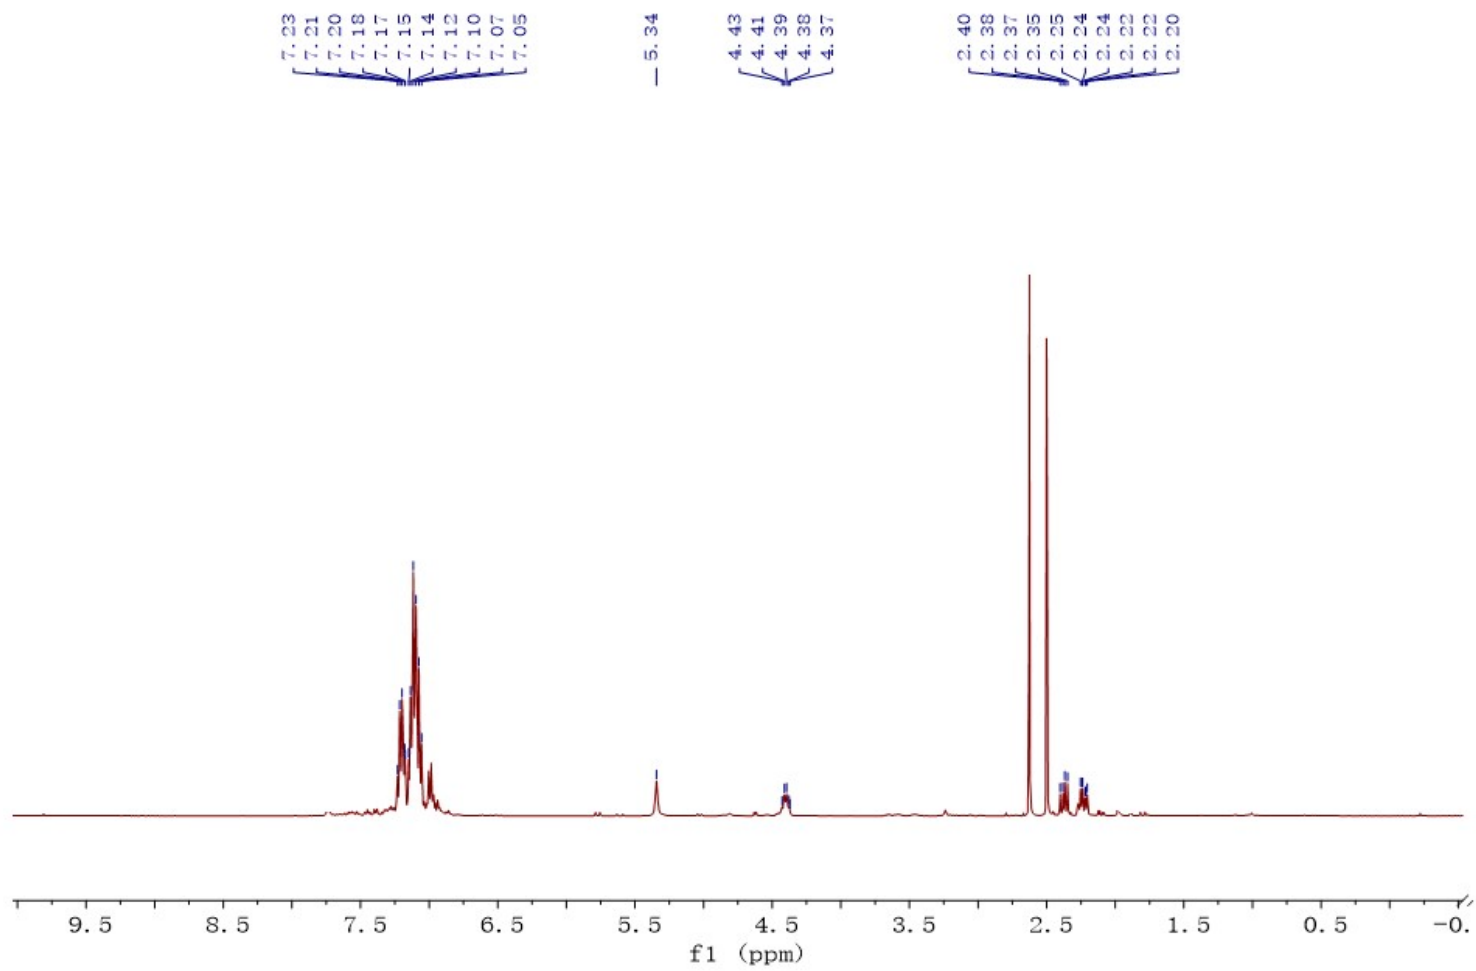

**Fig. S11.**  $^1\text{H}$  NMR spectrum of **2** in  $\text{DMSO-}d_6$

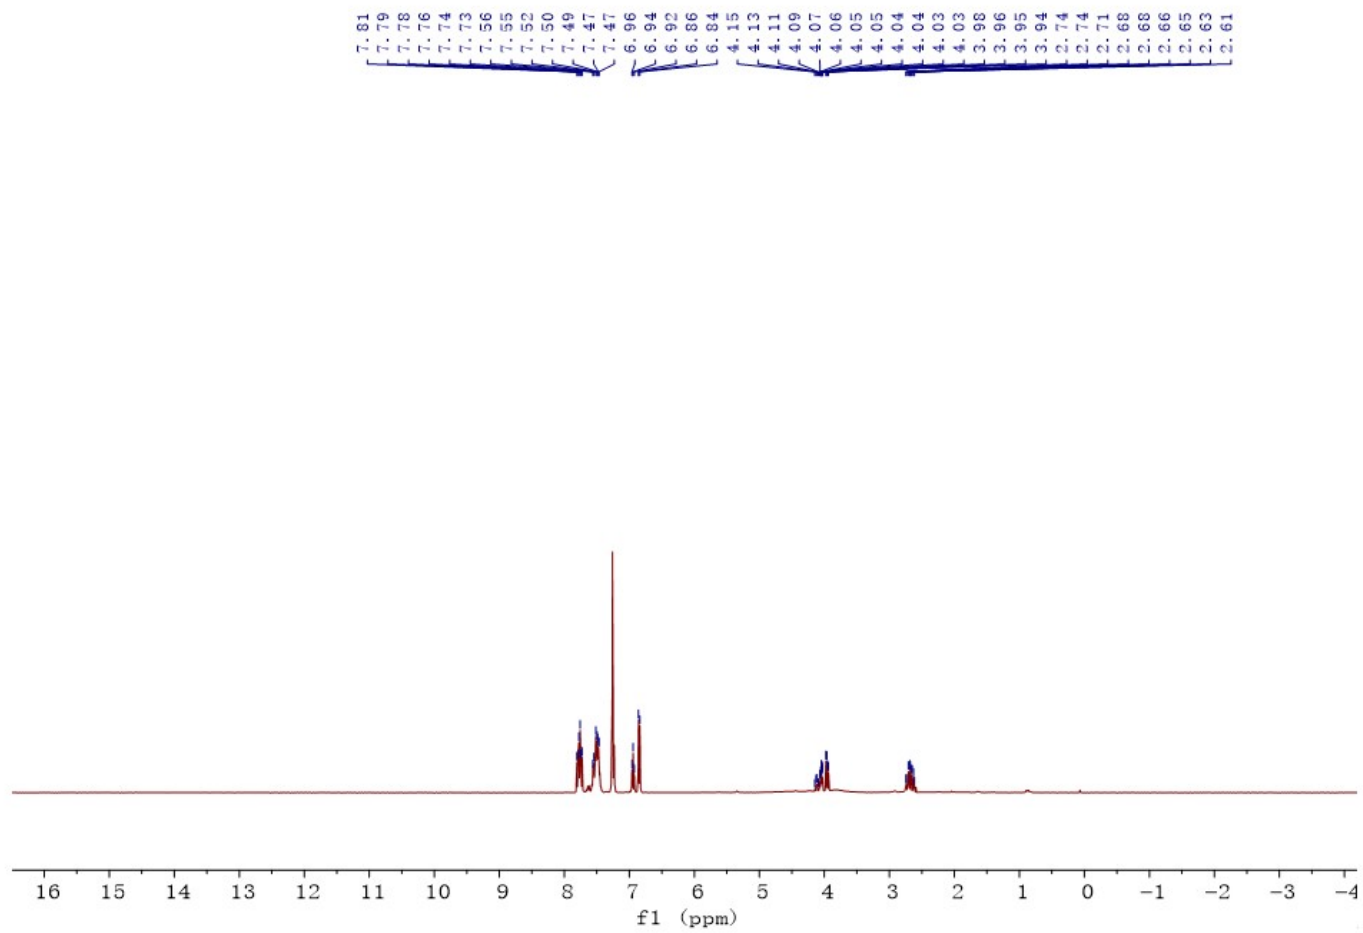

**Fig. S12.**  $^1\text{H}$  NMR spectrum of **3** in  $\text{CDCl}_3$

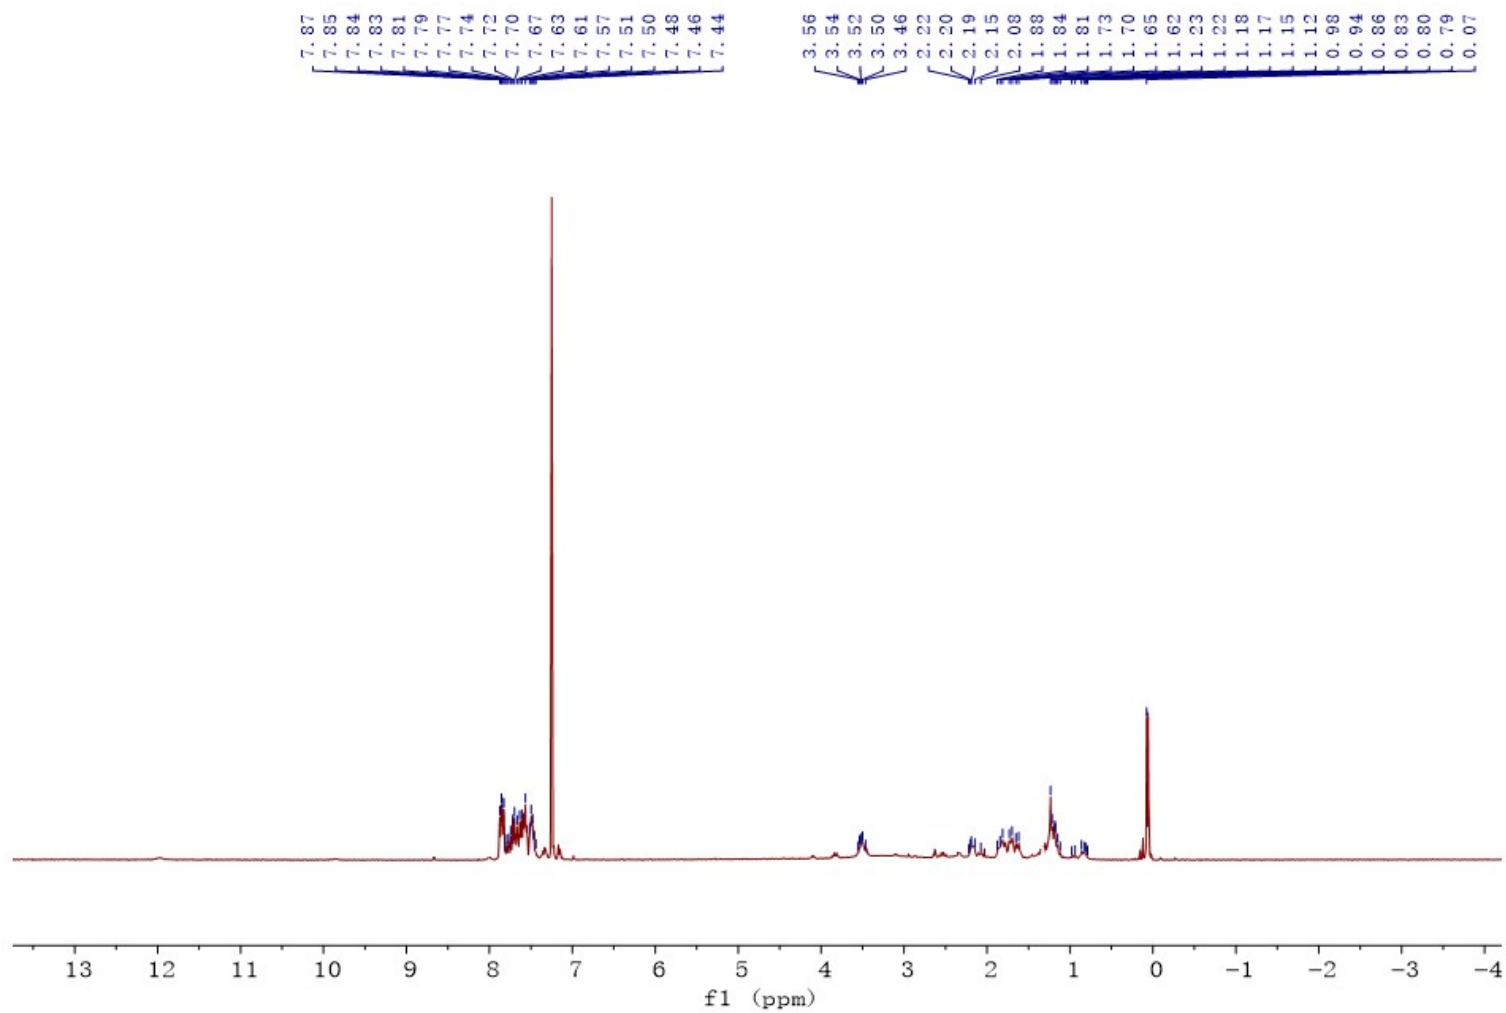

**Fig. S13.**  $^1\text{H}$  NMR spectrum of **1a** in  $\text{CDCl}_3$





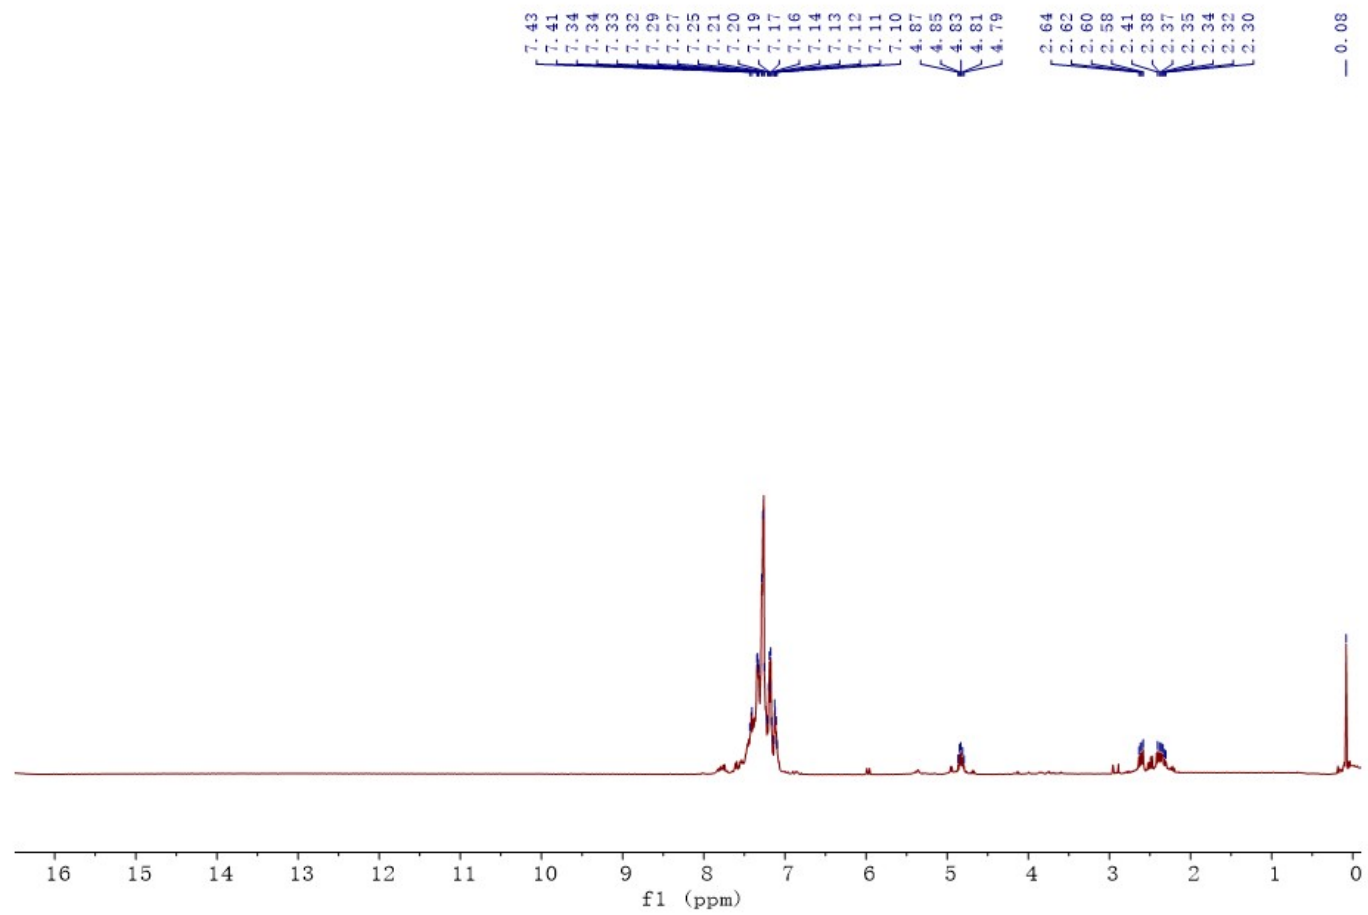

**Fig. S16.**  $^1\text{H}$  NMR spectrum of **2a** in  $\text{CDCl}_3$



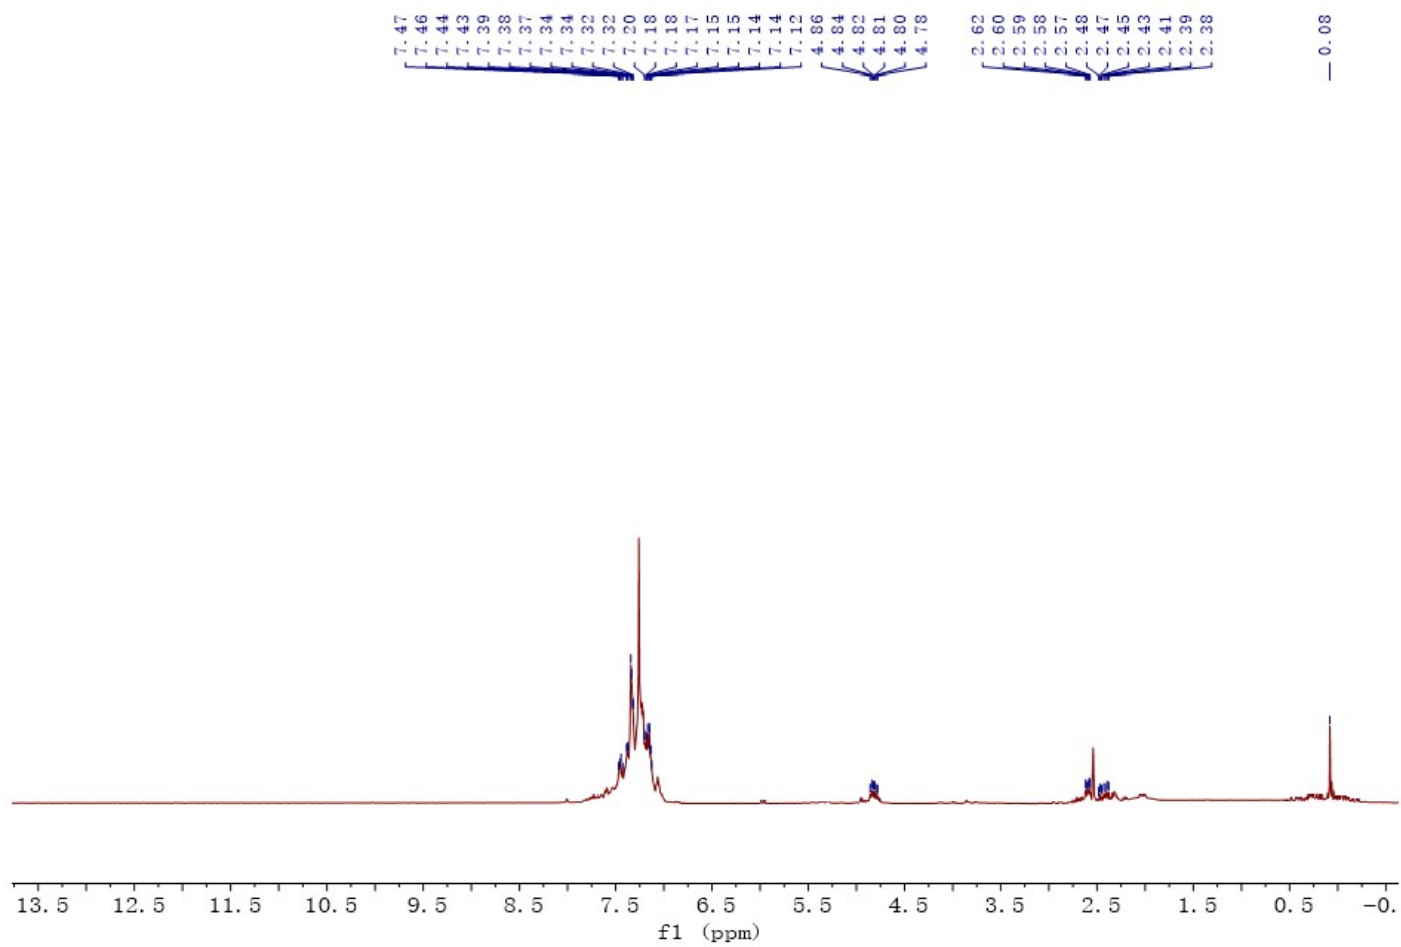

Fig. S17. <sup>1</sup>H NMR spectrum of **2b** in CDCl<sub>3</sub>

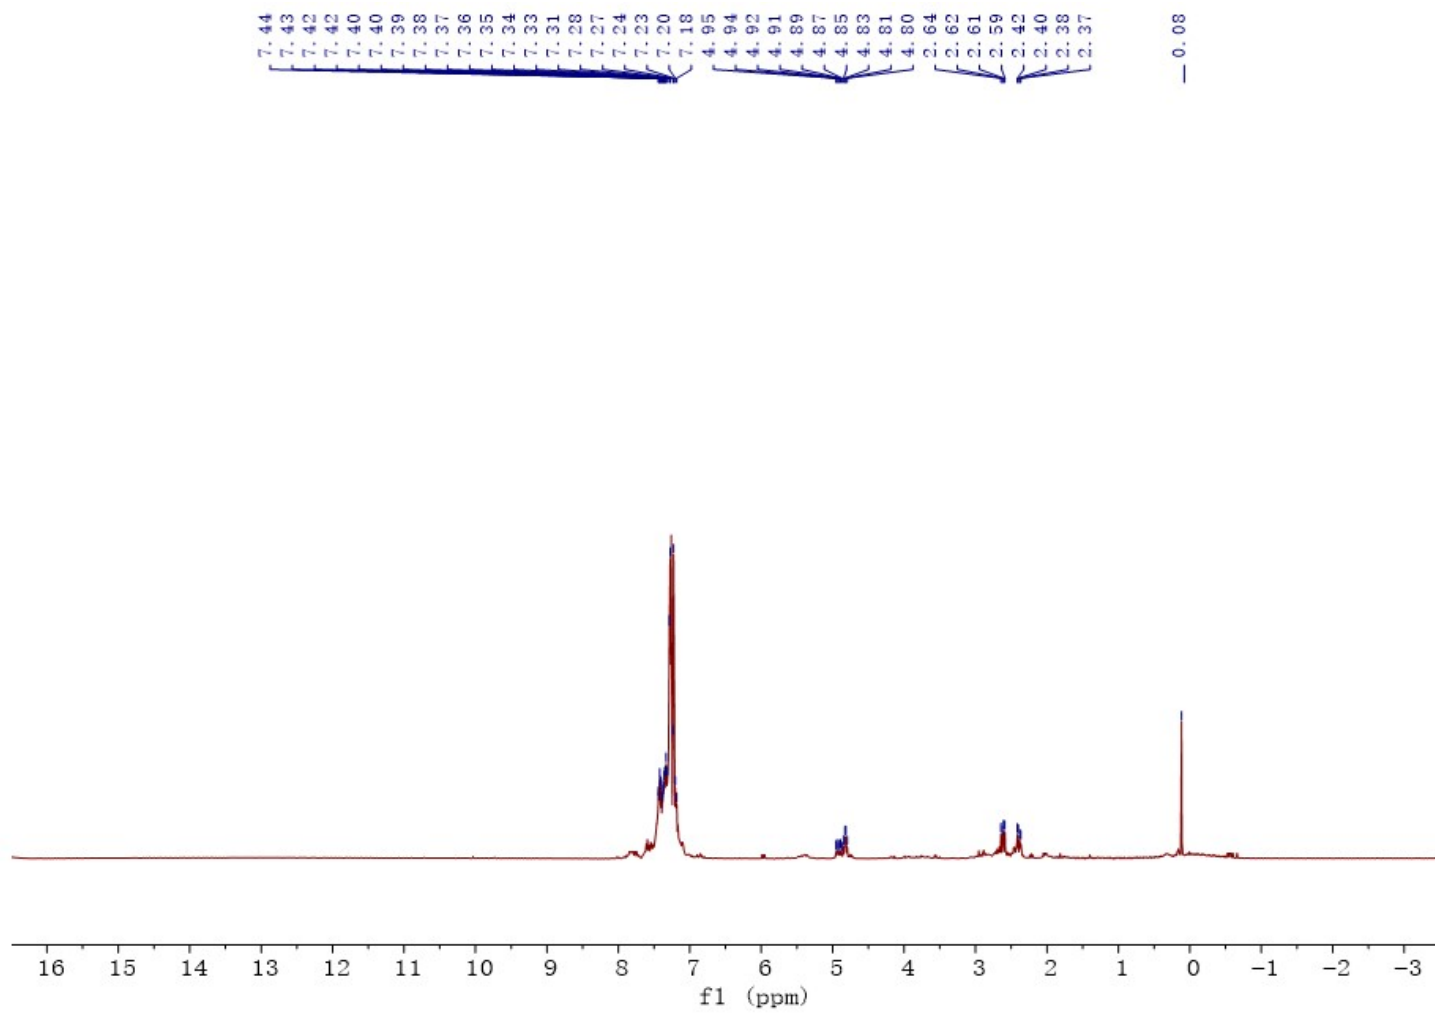

**Fig. S18.**  $^1\text{H}$  NMR spectrum of **2c** in  $\text{CDCl}_3$

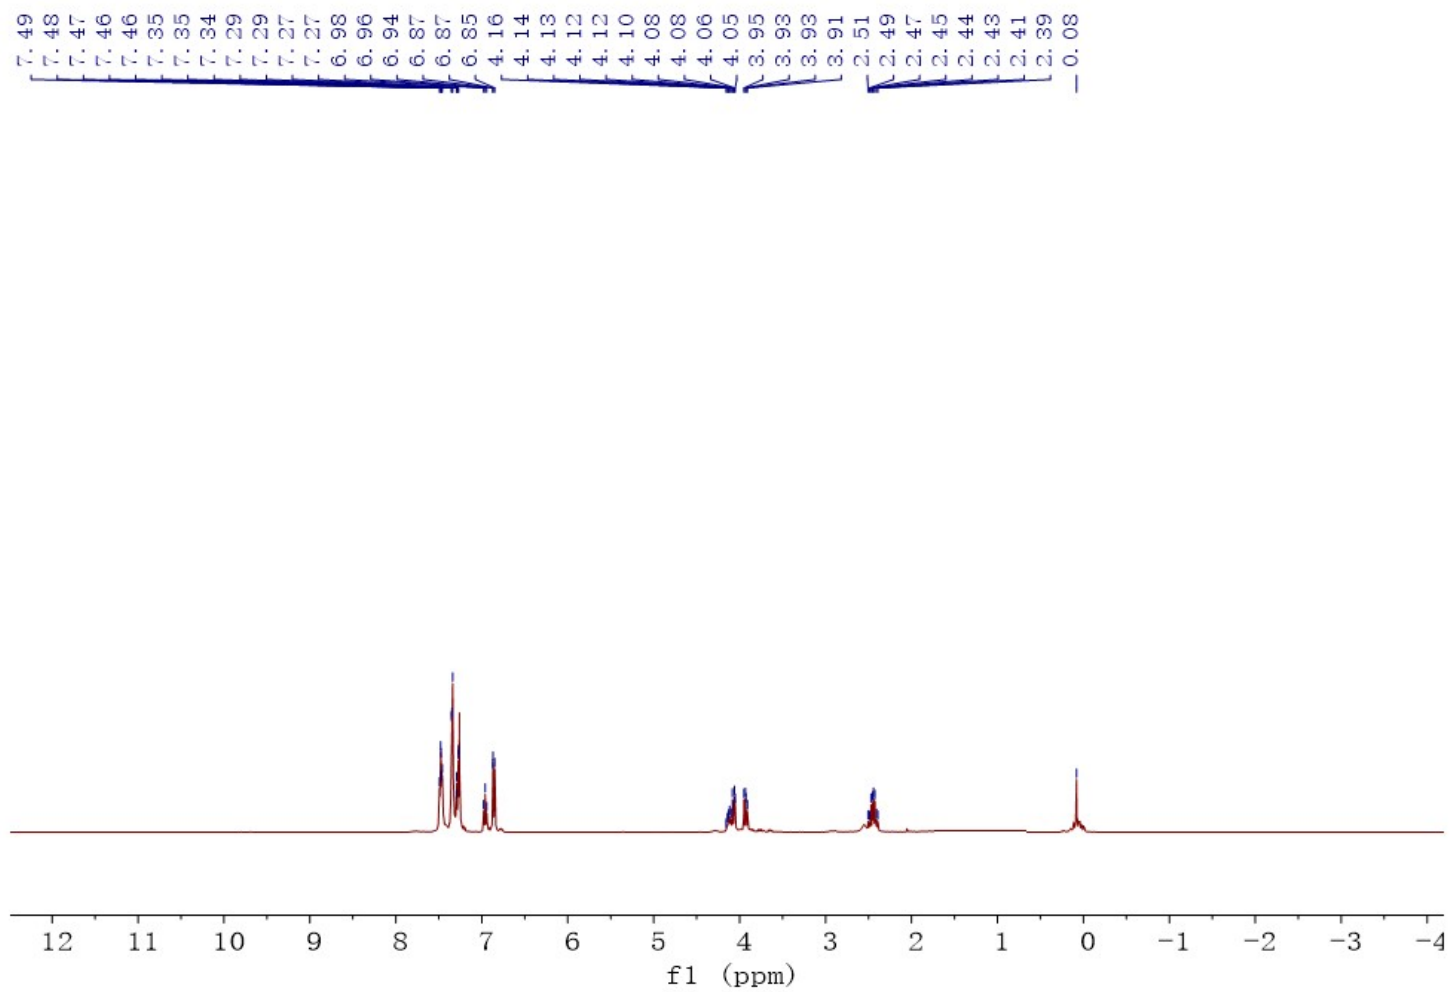

**Fig. S19.**  $^1\text{H}$  NMR spectrum of **3a** in  $\text{CDCl}_3$

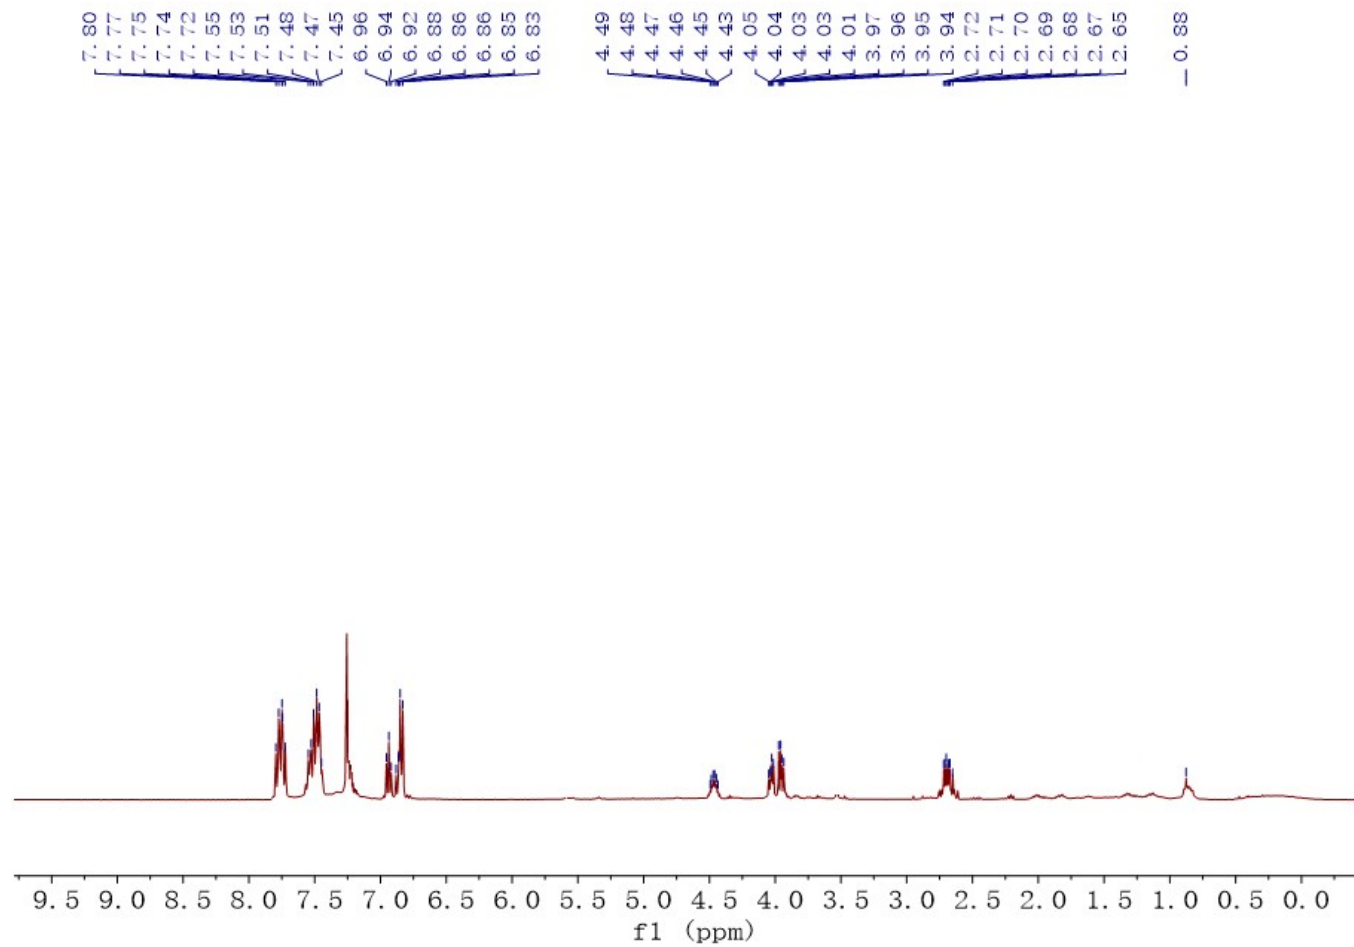

**Fig. S20.** <sup>1</sup>H NMR spectrum of **3b** in CDCl<sub>3</sub>

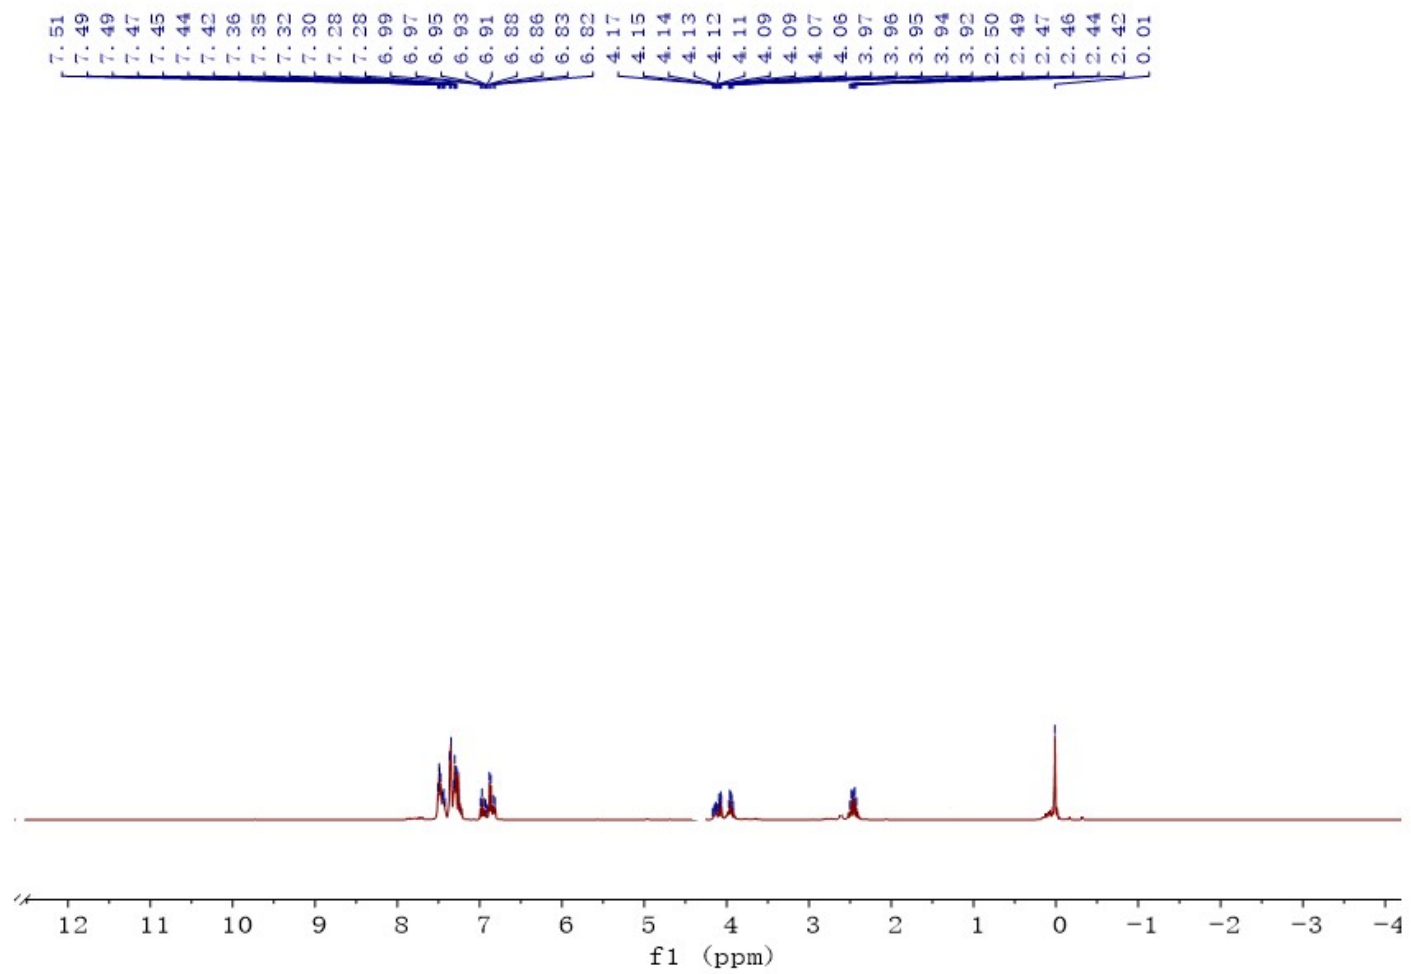

Fig. S21.  $^1\text{H}$  NMR spectrum of **3c** in  $\text{CDCl}_3$

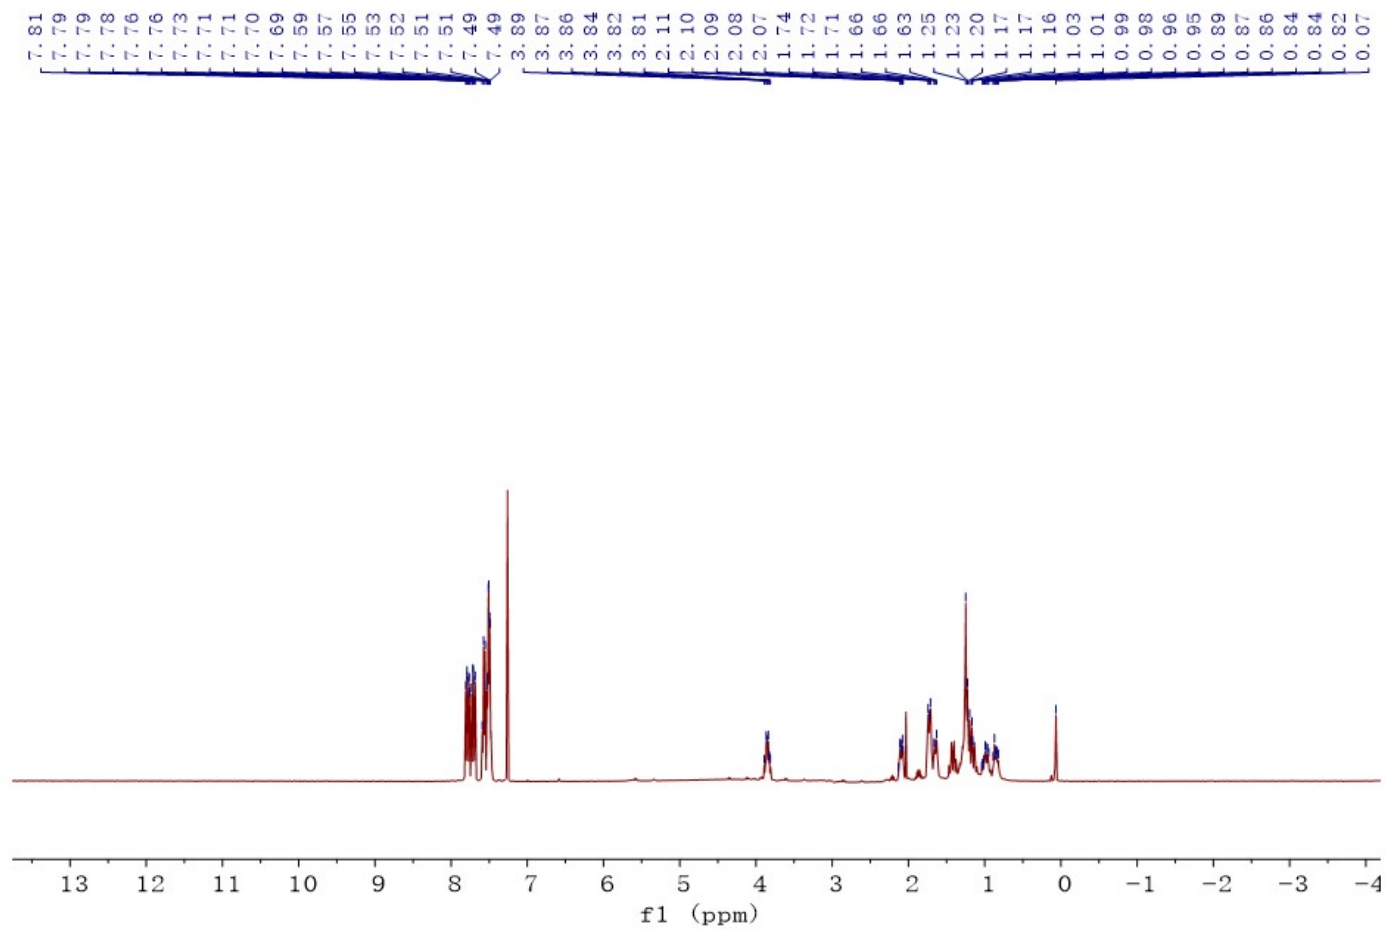

Fig. S22.  $^1\text{H}$  NMR spectrum of **4a** in  $\text{CDCl}_3$

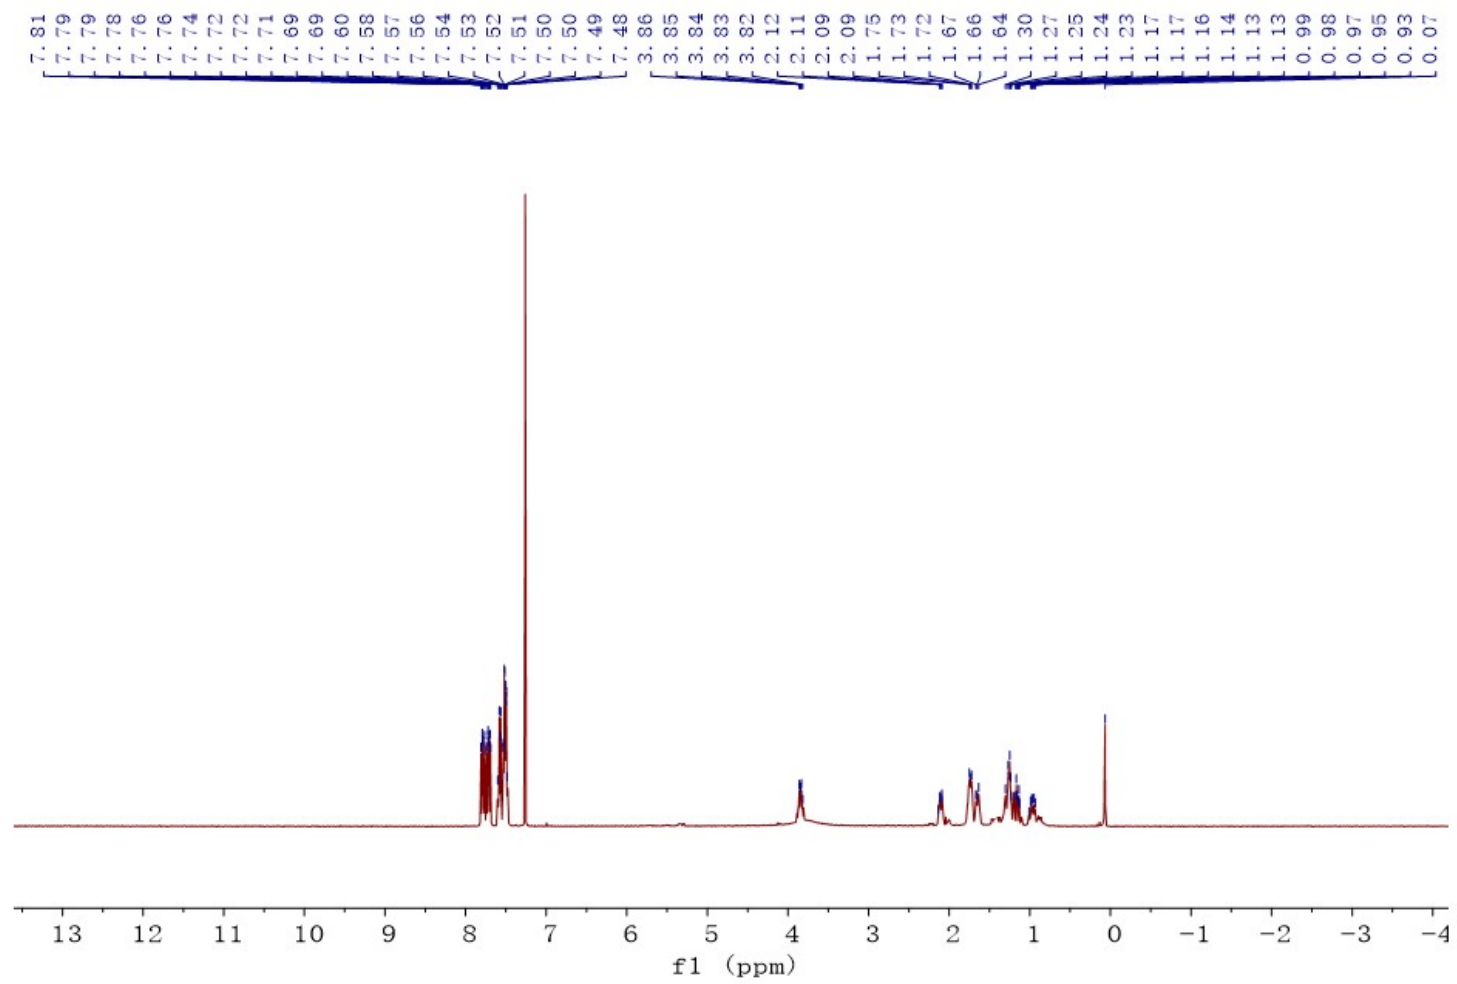

**Fig. S23.**  $^1\text{H}$  NMR spectrum of **4b** in  $\text{CDCl}_3$

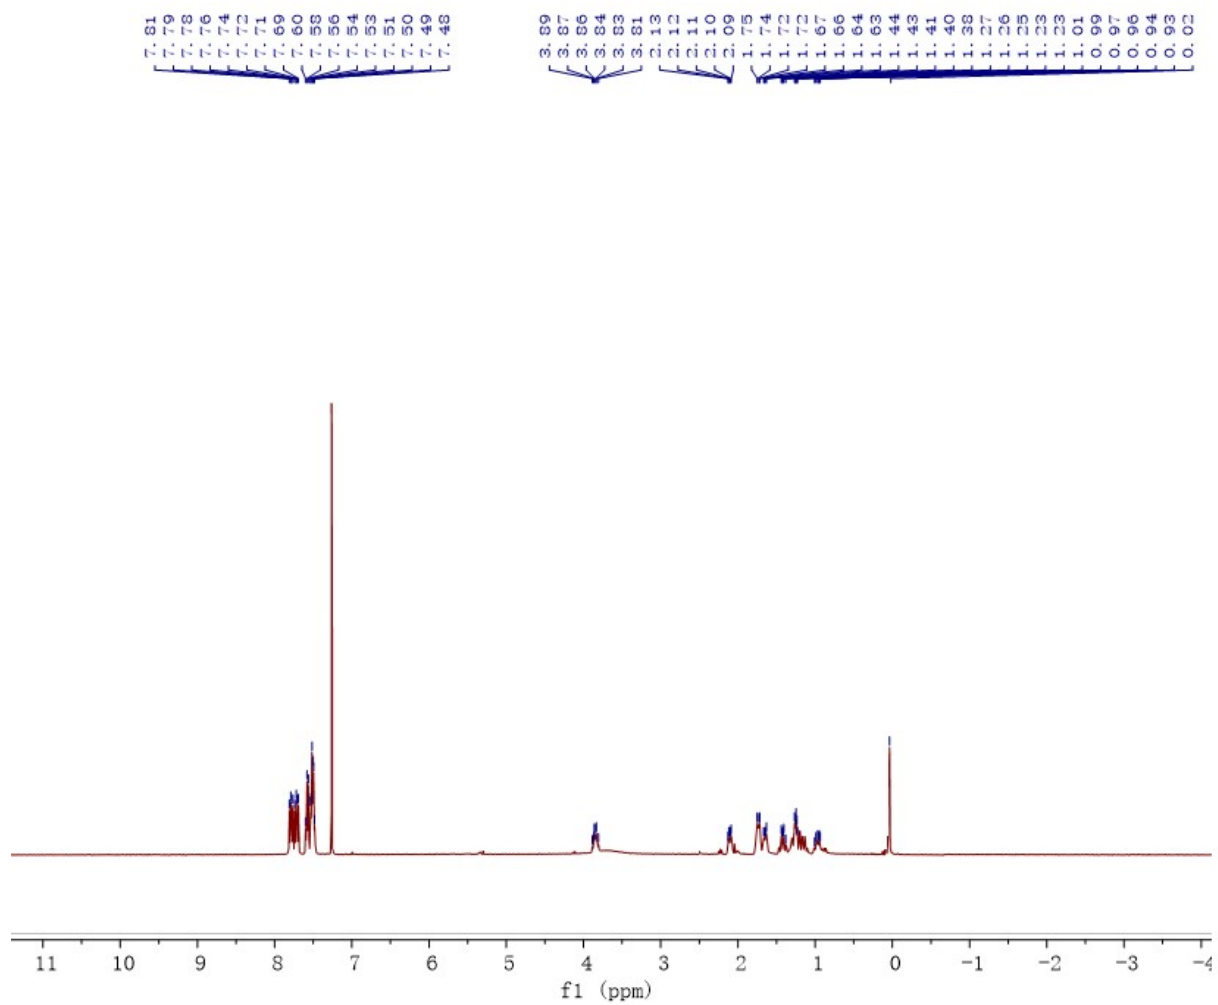

Fig. S24. <sup>1</sup>H NMR spectrum of **4c** in CDCl<sub>3</sub>



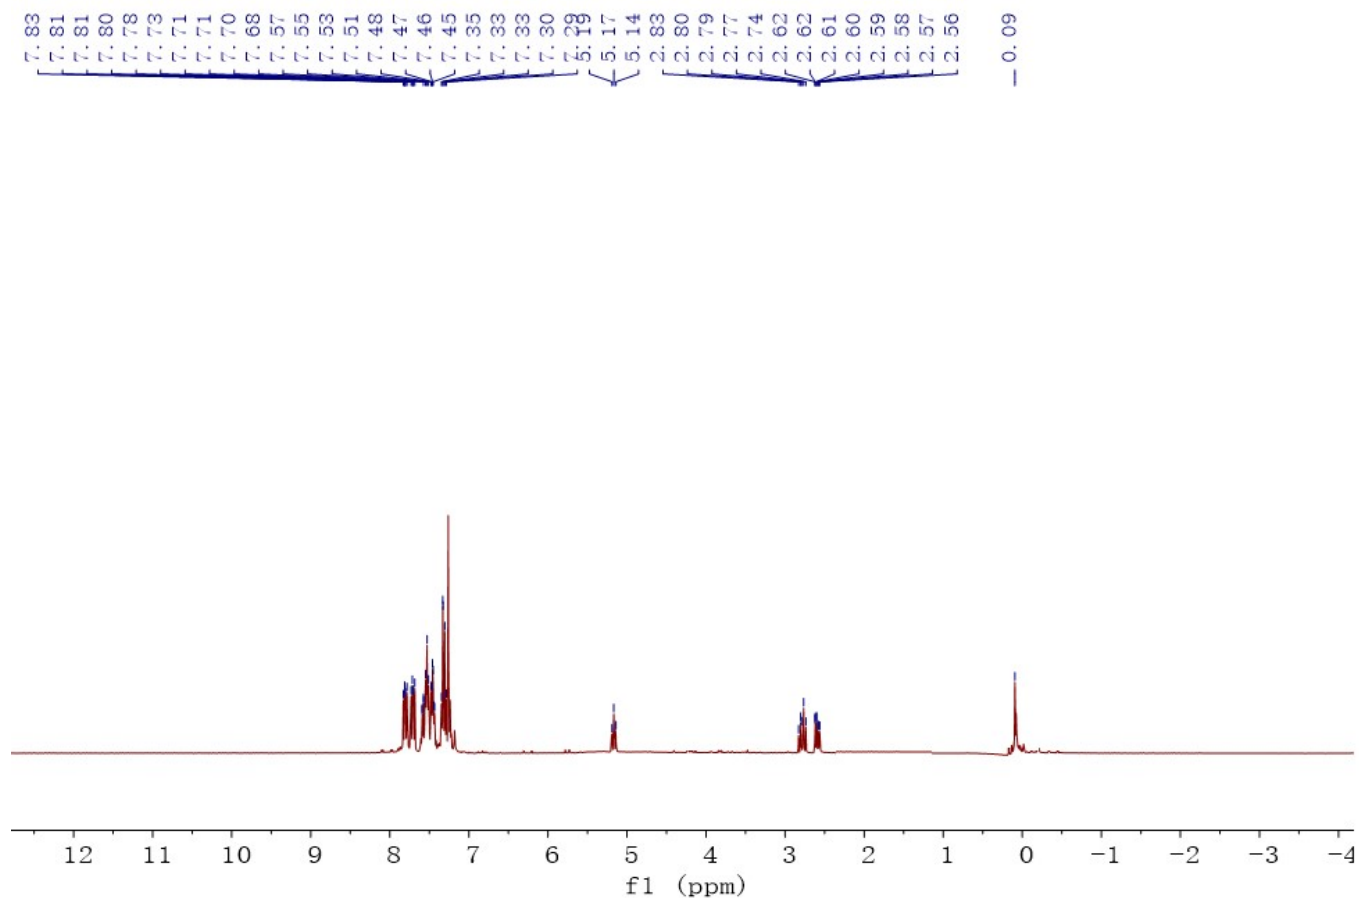

Fig. S25.  $^1\text{H}$  NMR spectrum of **5a** in  $\text{CDCl}_3$

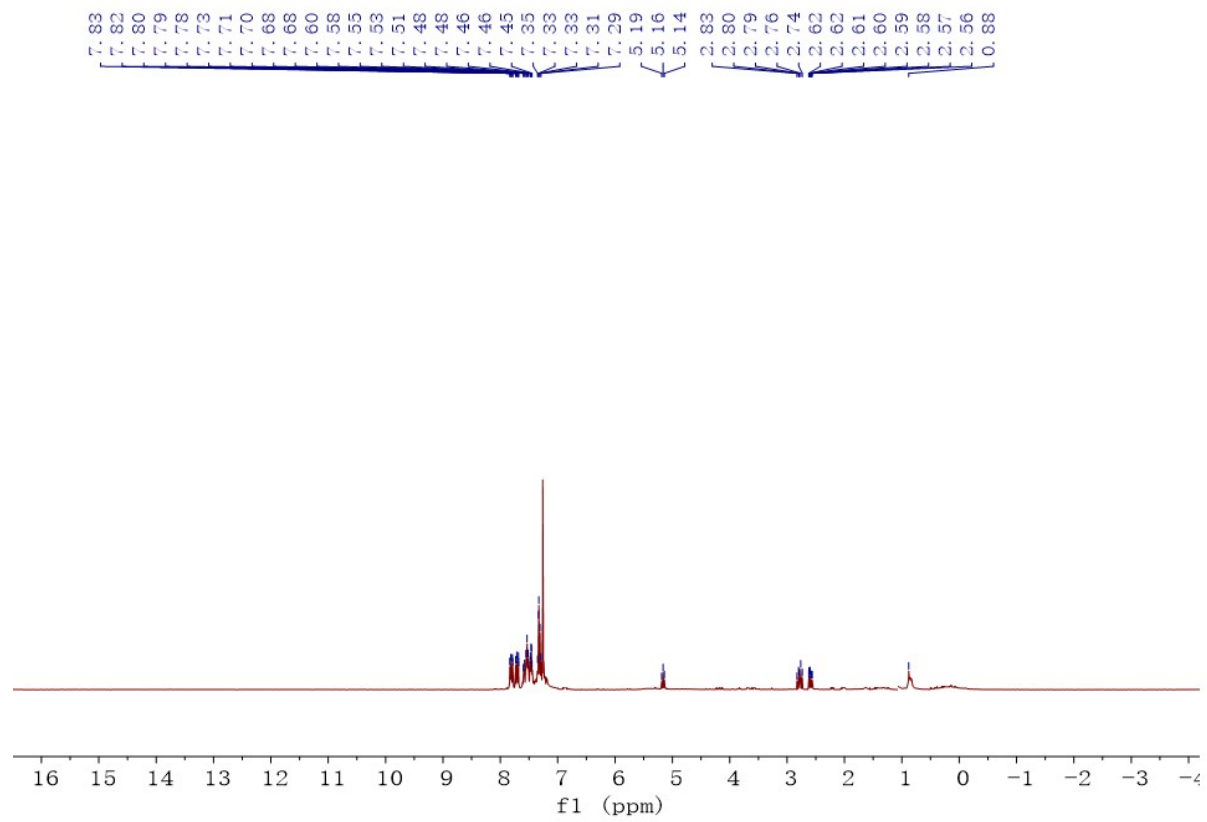

Fig. S26.  $^1\text{H}$  NMR spectrum of **5b** in  $\text{CDCl}_3$

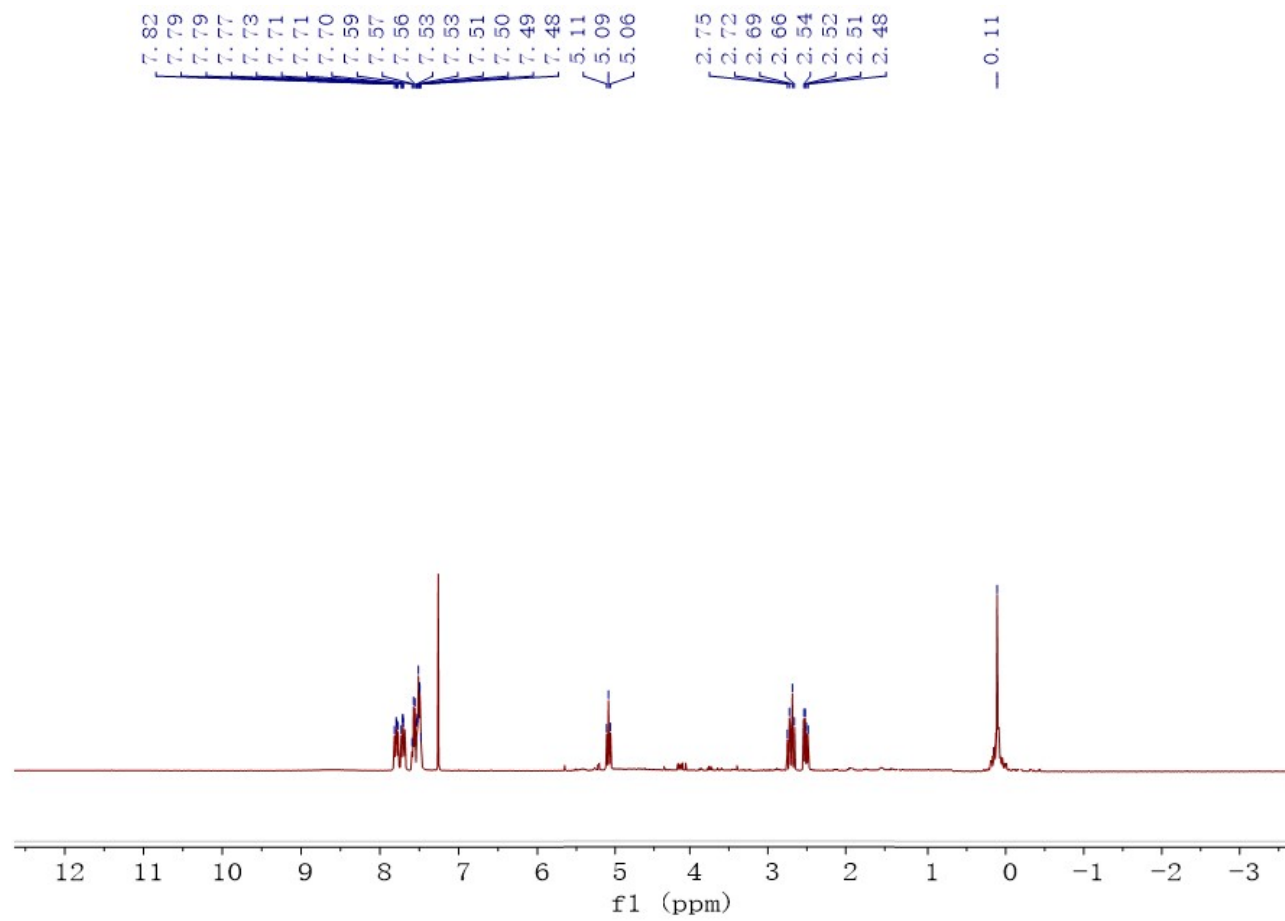

**Fig. S27.** <sup>1</sup>H NMR spectrum of **5c** in CDCl<sub>3</sub>

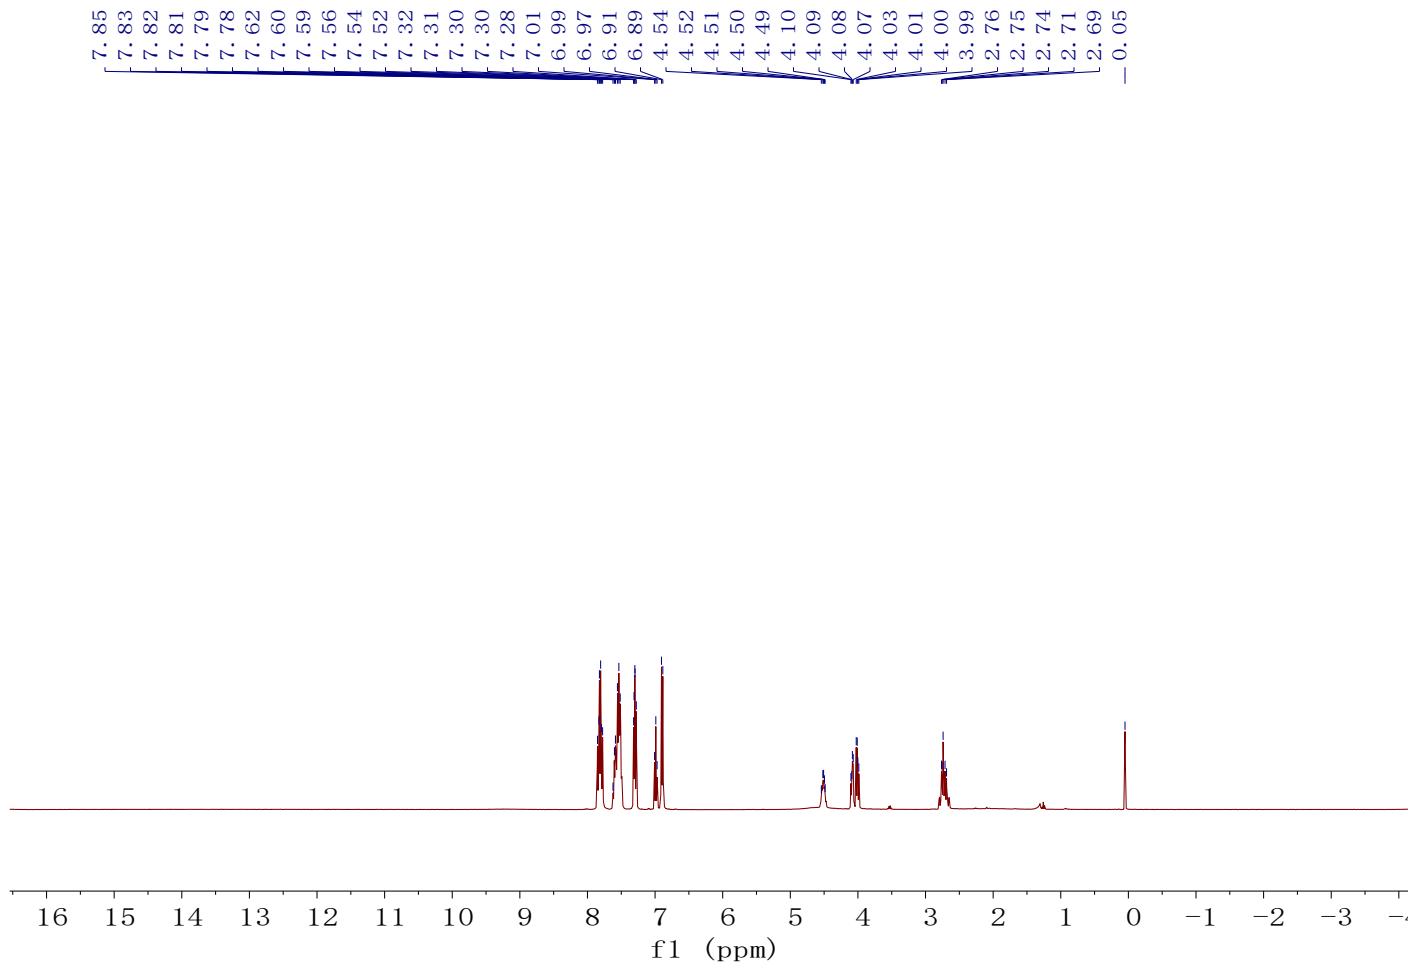

**Fig. S28.** <sup>1</sup>H NMR spectrum of **6a** in CDCl<sub>3</sub>

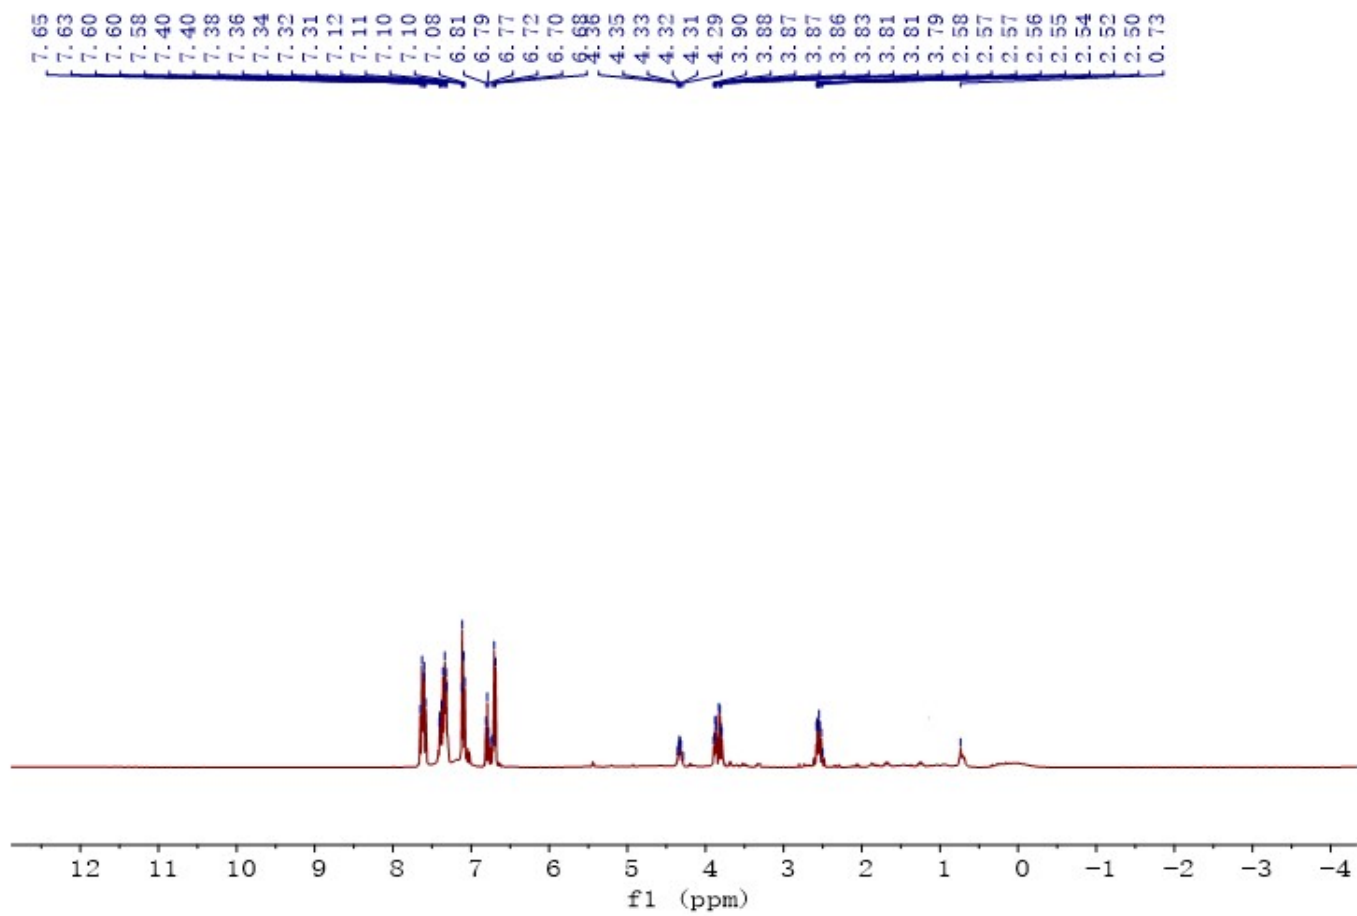

Fig. S29.  $^1\text{H}$  NMR spectrum of **6b** in  $\text{CDCl}_3$

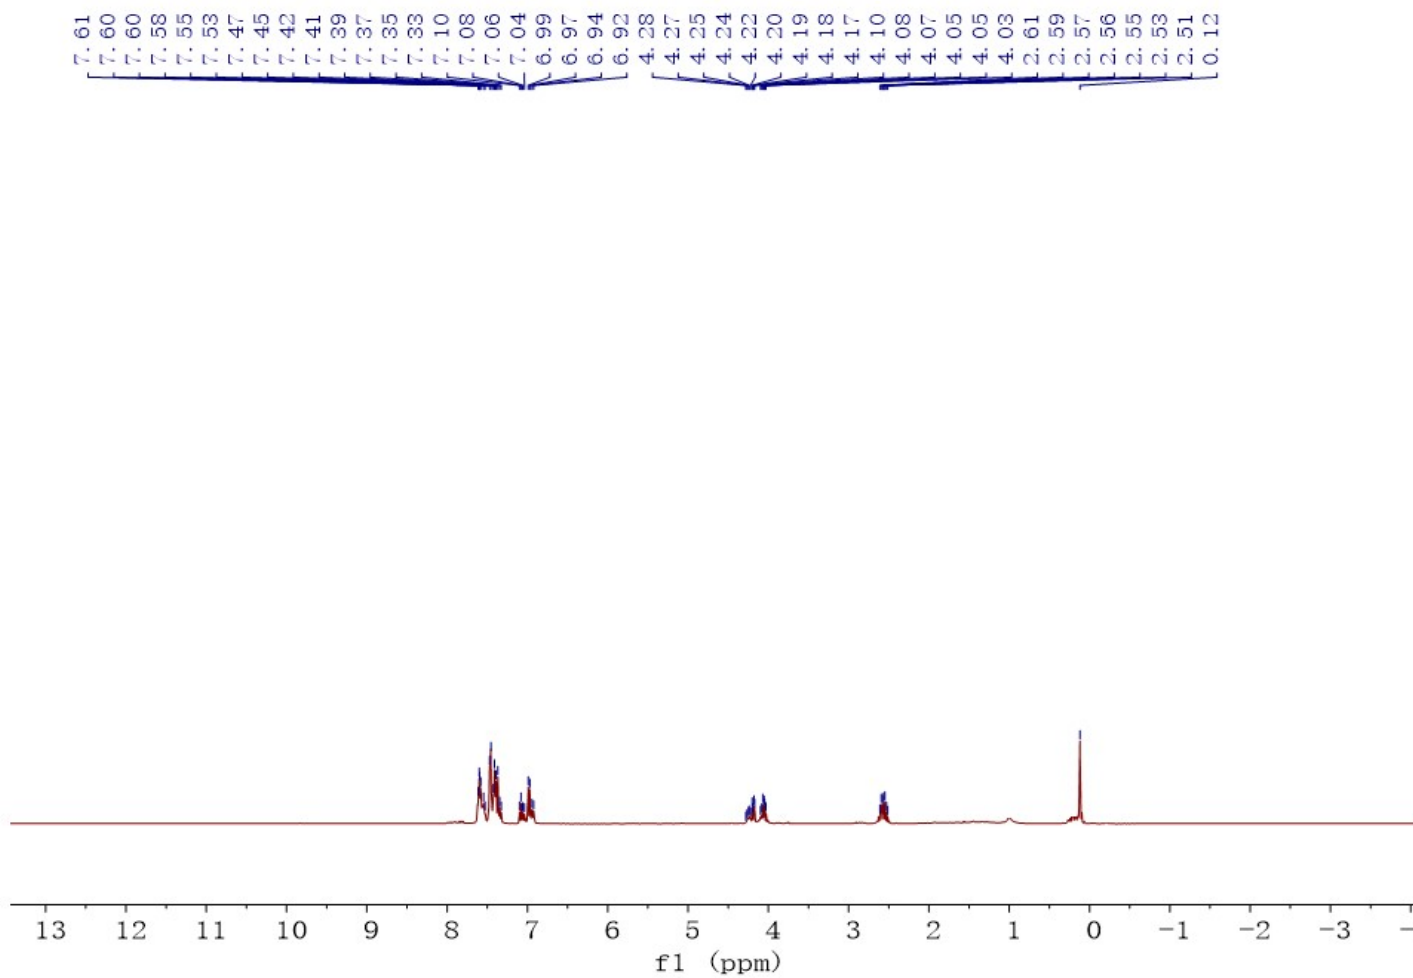

Fig. S30.  $^1\text{H}$  NMR spectrum of **6c** in  $\text{CDCl}_3$

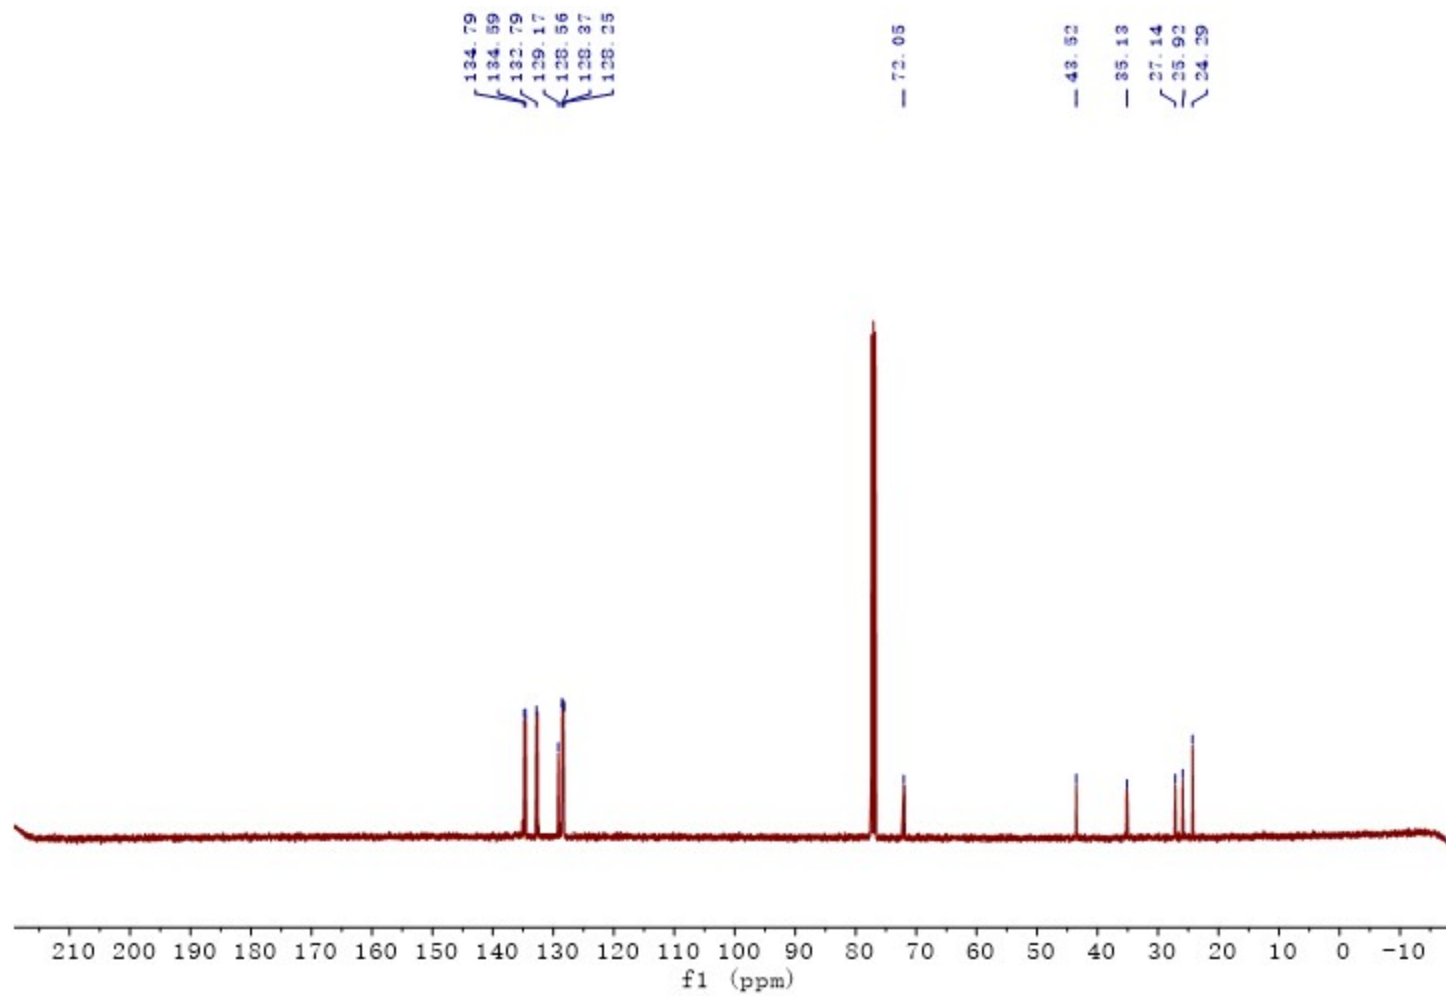

Fig. S31.  $^{13}\text{C}$  NMR spectrum of **1** in  $\text{CDCl}_3$

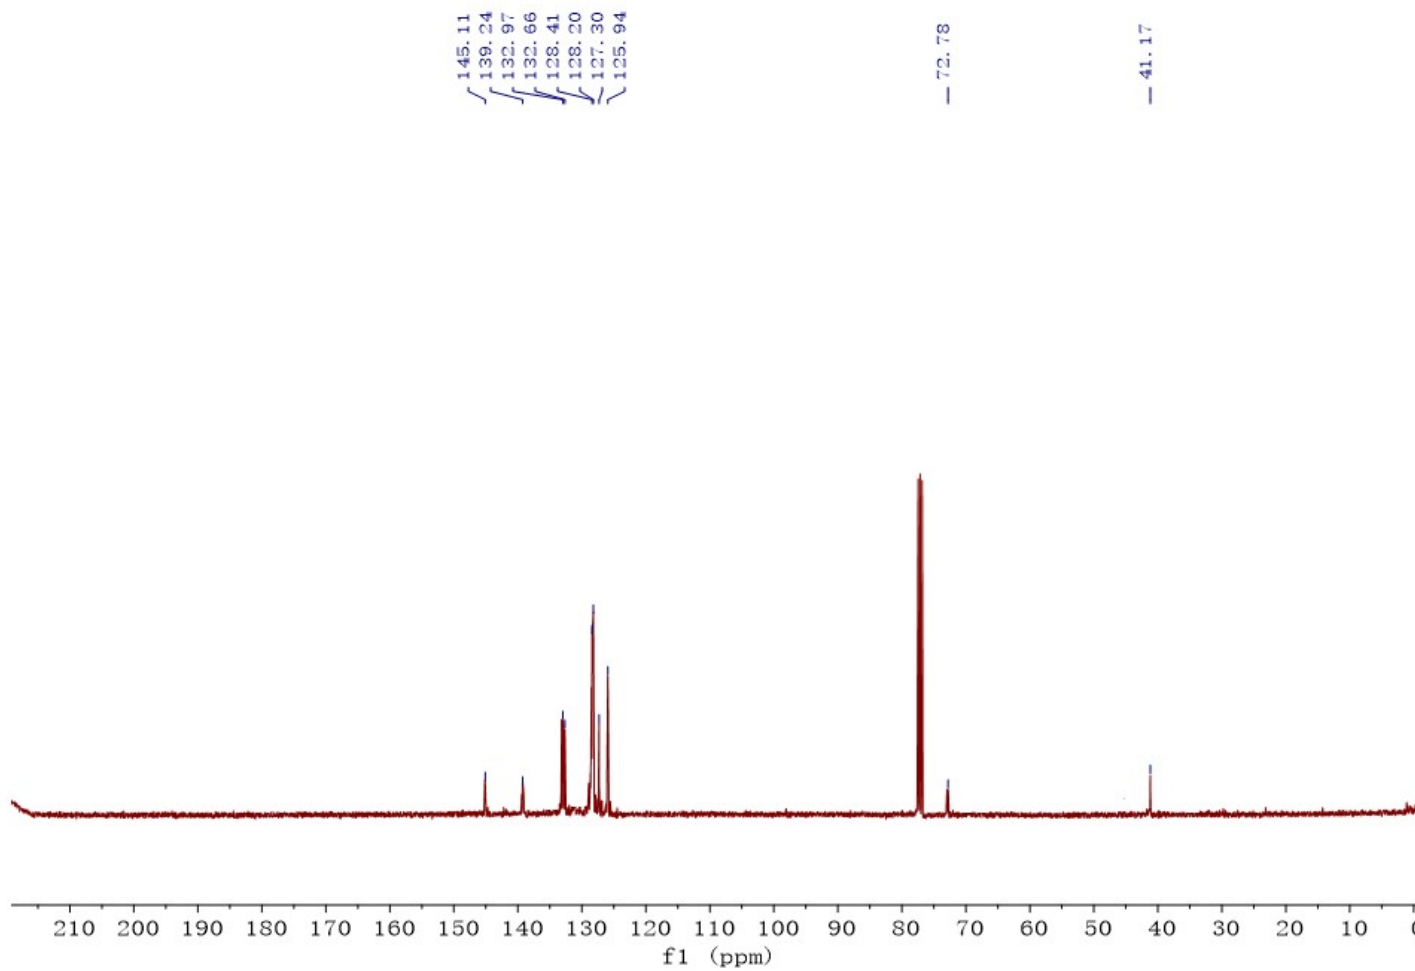

Fig. S32.  $^{13}\text{C}$  NMR spectrum of **2** in  $\text{CDCl}_3$



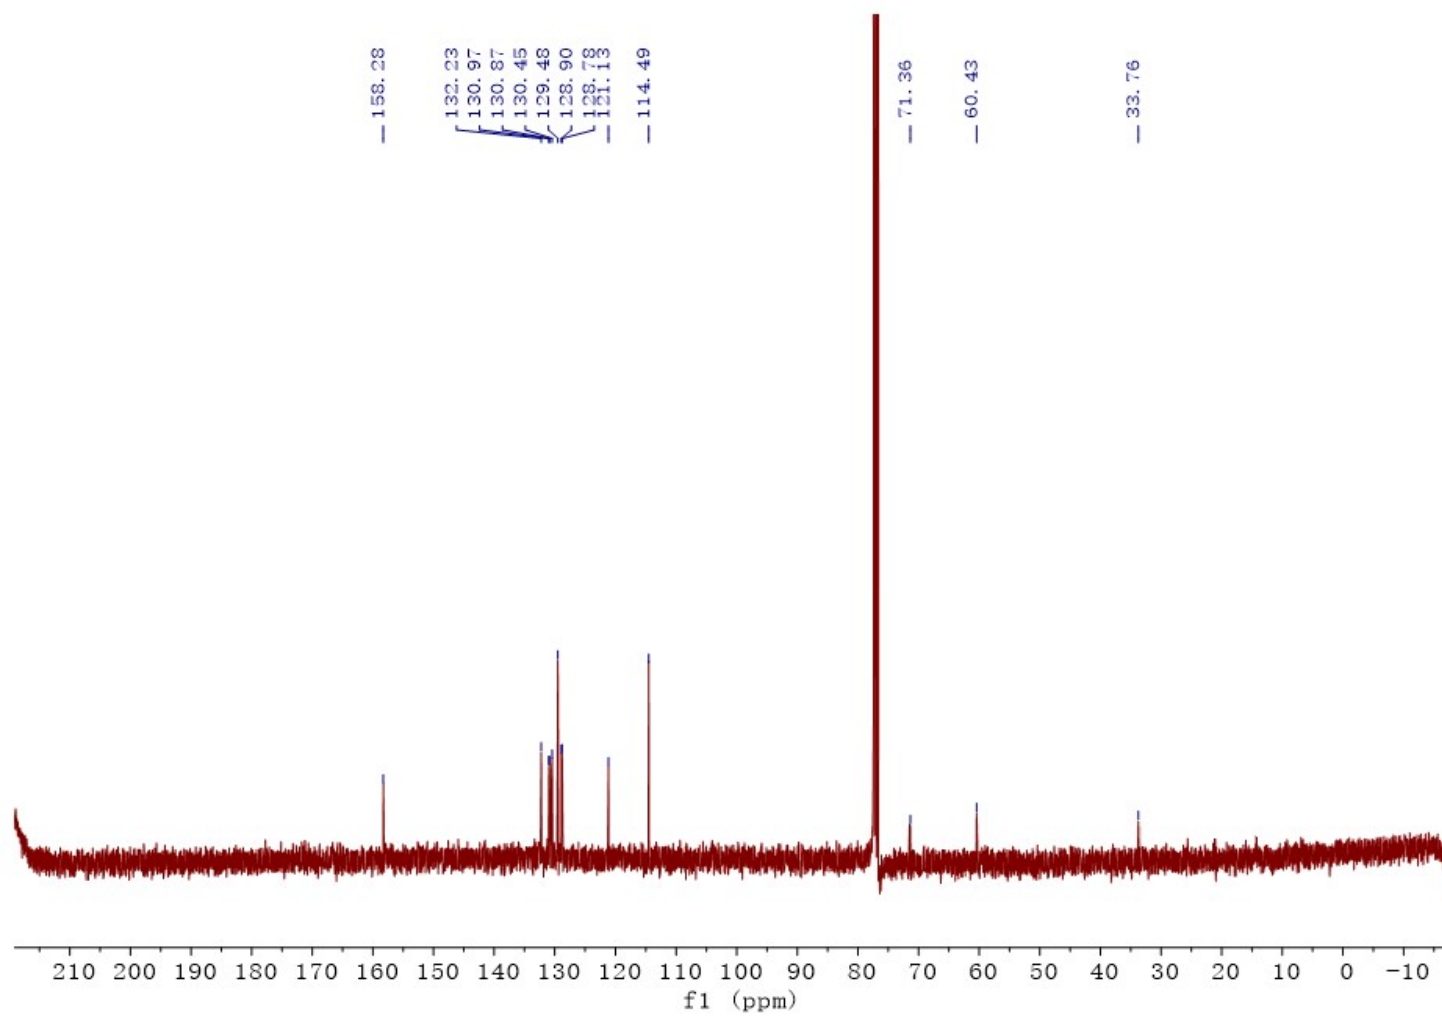

**Fig. S33.**  $^{13}\text{C}$  NMR spectrum of **3** in  $\text{CDCl}_3$

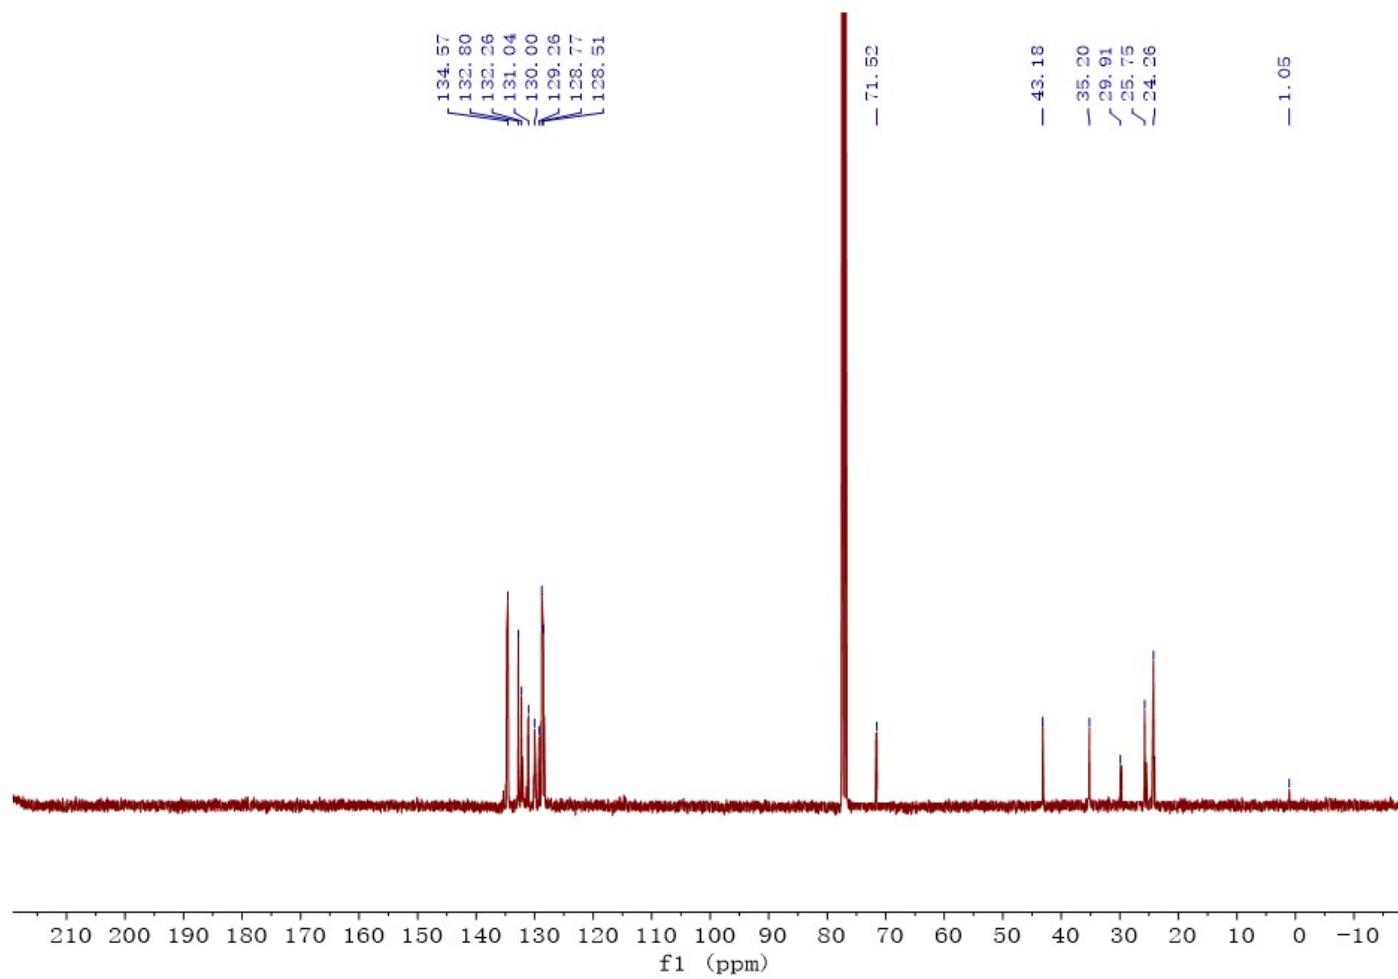

**Fig. S34.** <sup>13</sup>C NMR spectrum of **1a** in CDCl<sub>3</sub>

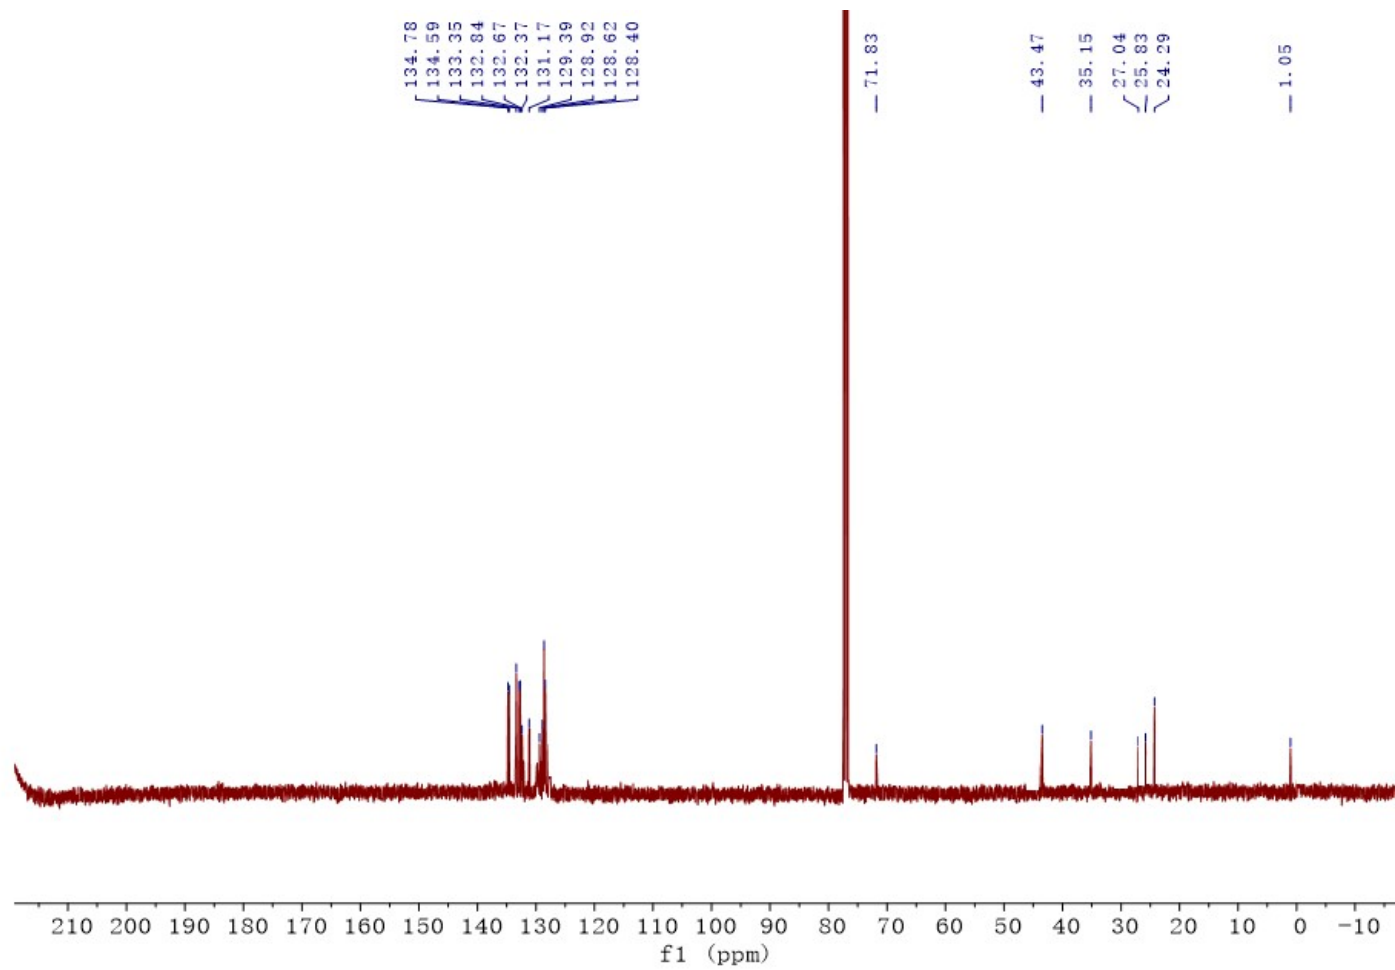

**Fig. S35.**  $^{13}\text{C}$  NMR spectrum of **1b** in  $\text{CDCl}_3$

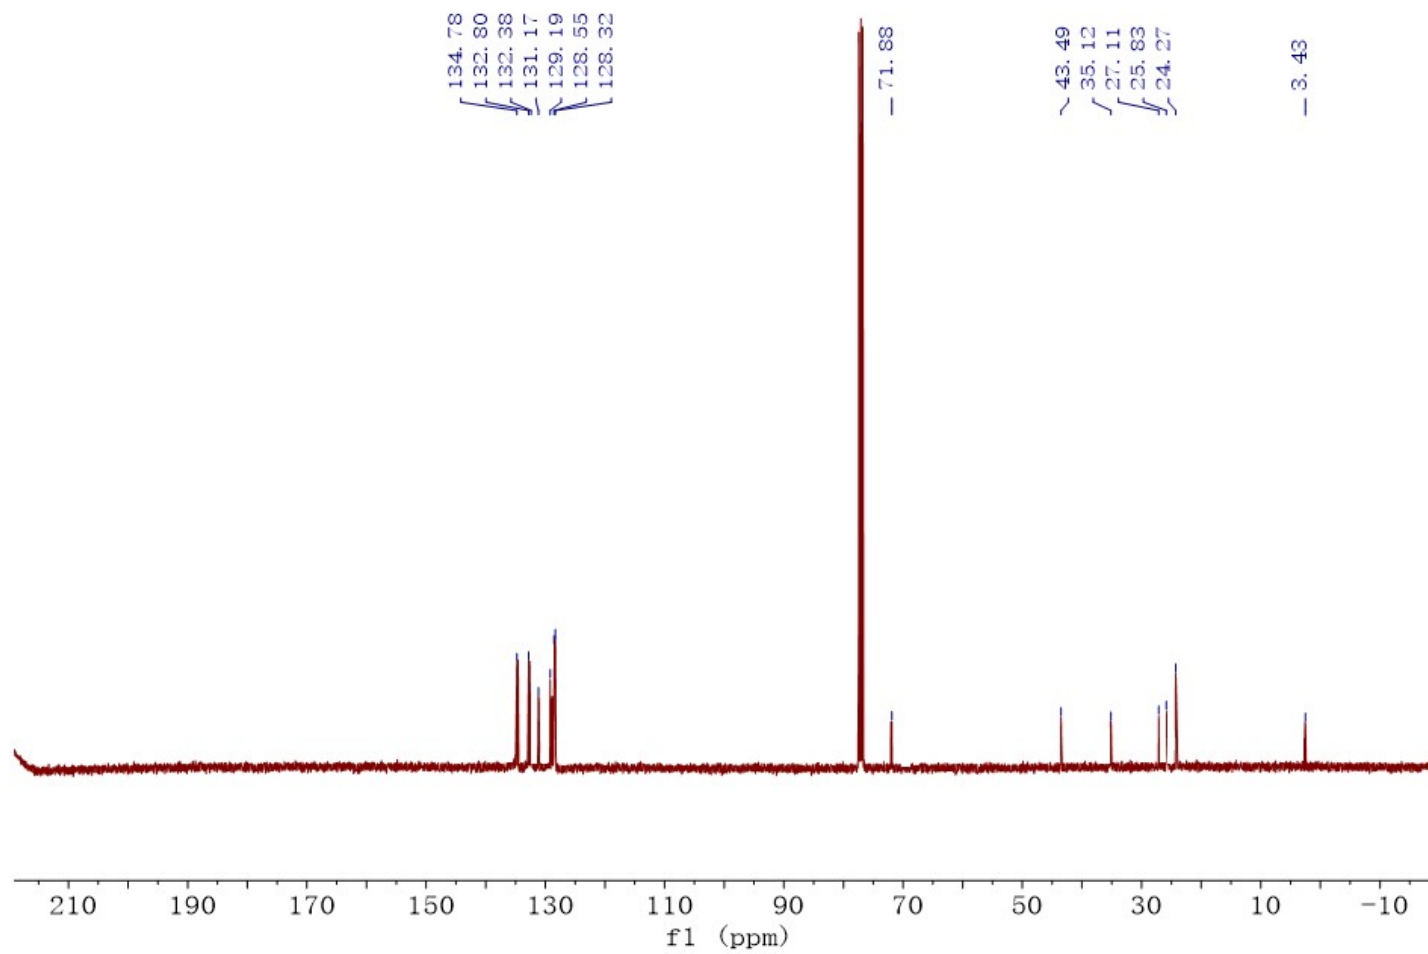

**Fig. S36.**  $^{13}\text{C}$  NMR spectrum of **1c** in  $\text{CDCl}_3$

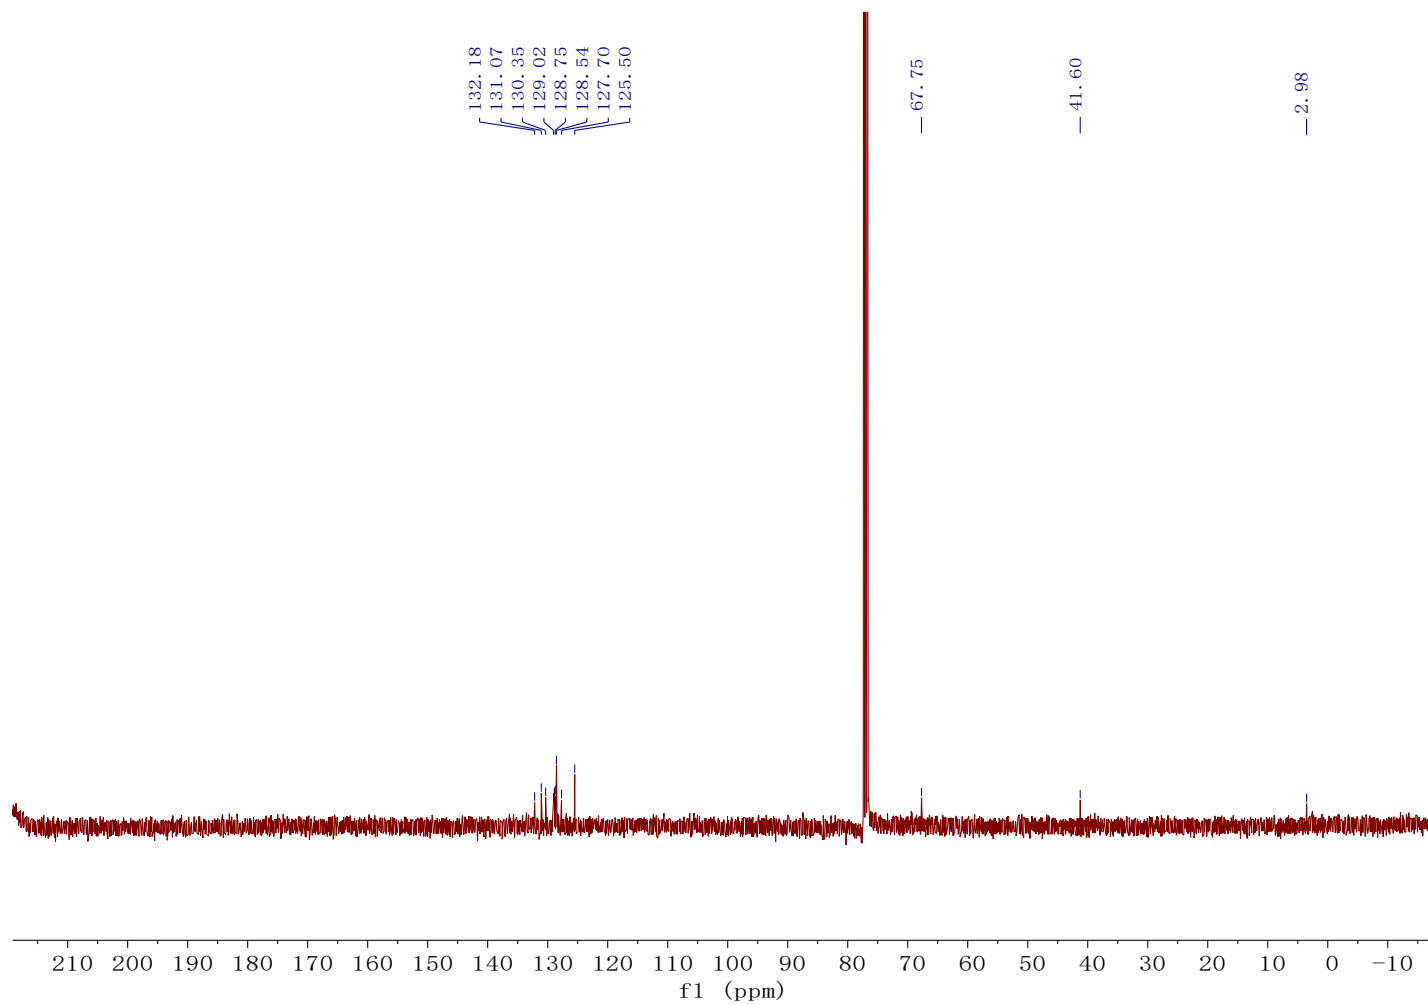

**Fig. S37.**  $^{13}\text{C}$  NMR spectrum of **2a** in  $\text{CDCl}_3$

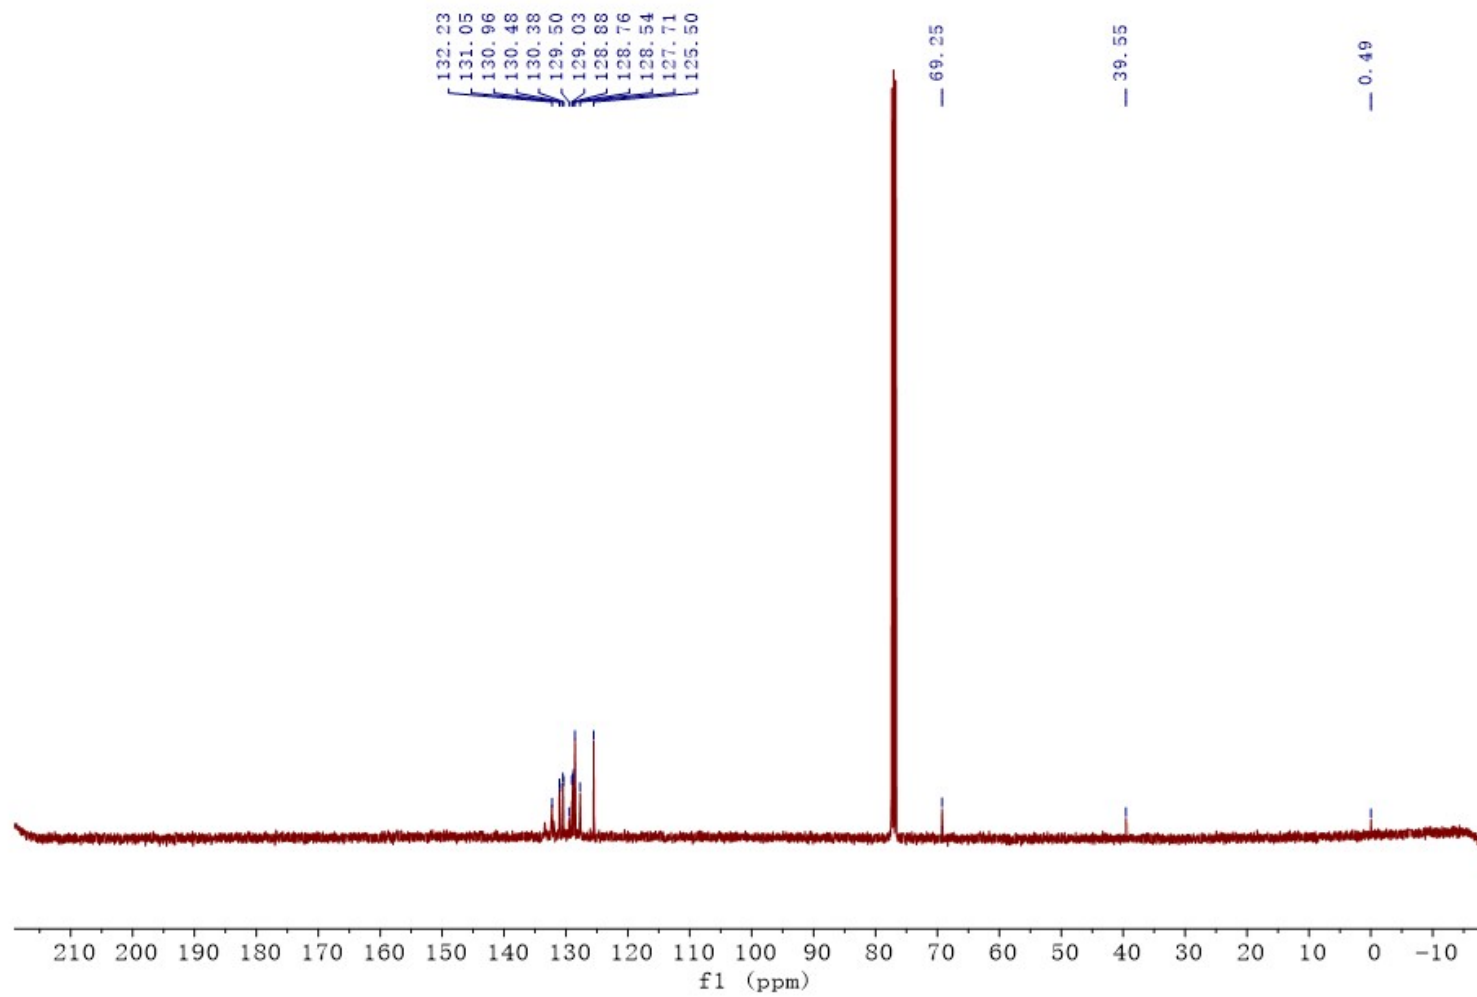

**Fig. S38.**  $^{13}\text{C}$  NMR spectrum of **2b** in  $\text{CDCl}_3$

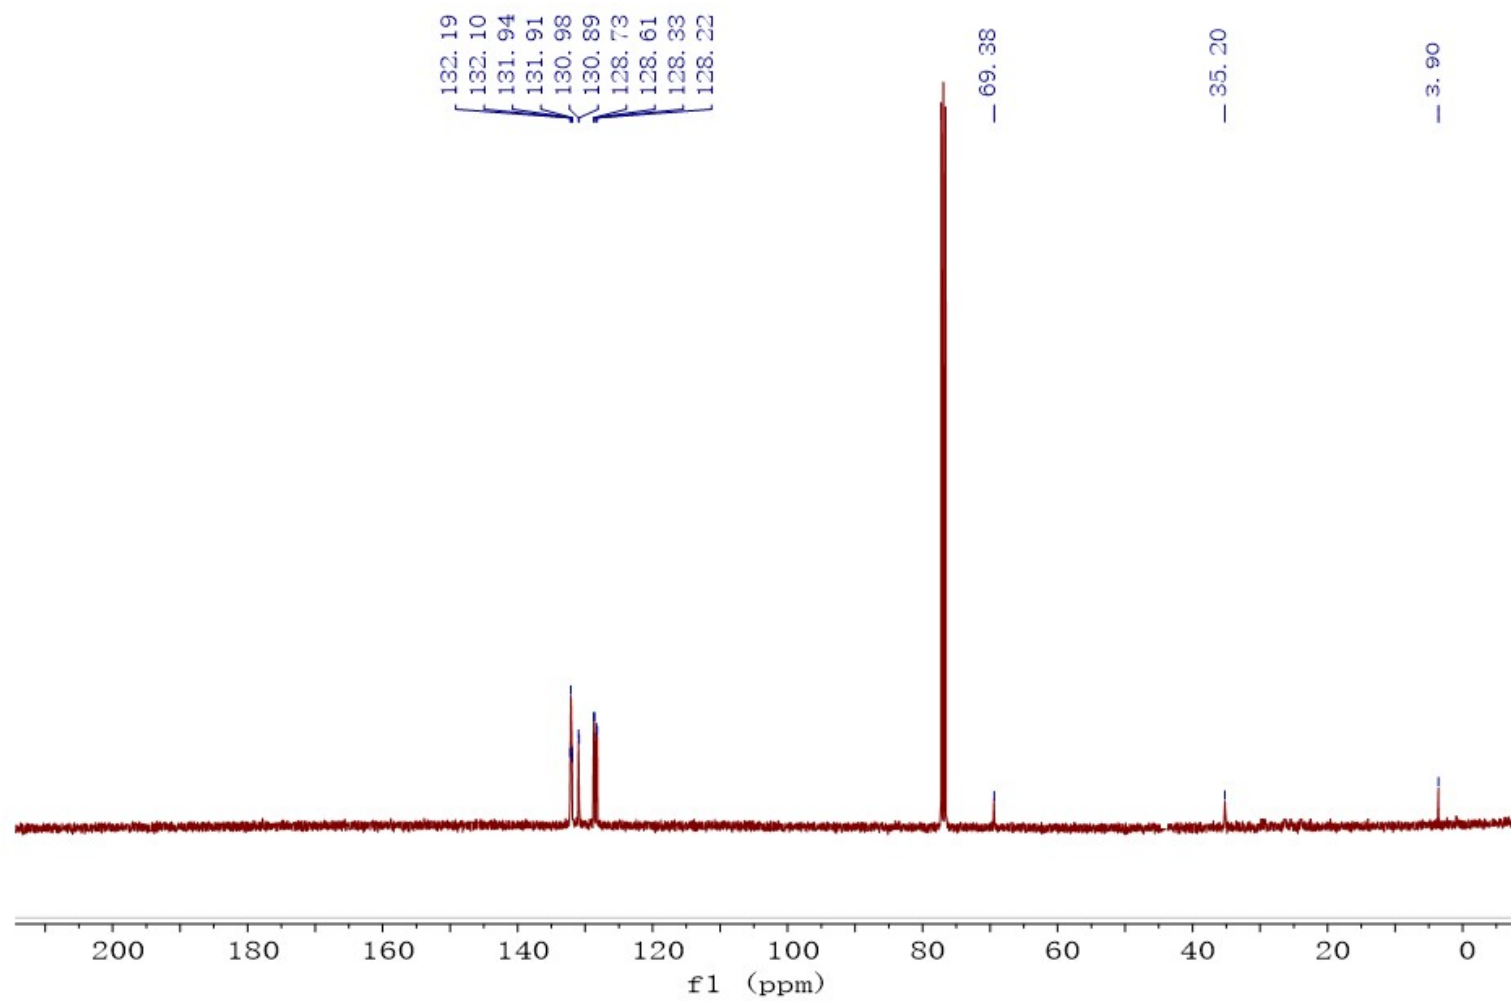

**Fig. S39.**  $^{13}\text{C}$  NMR spectrum of **2c** in  $\text{CDCl}_3$

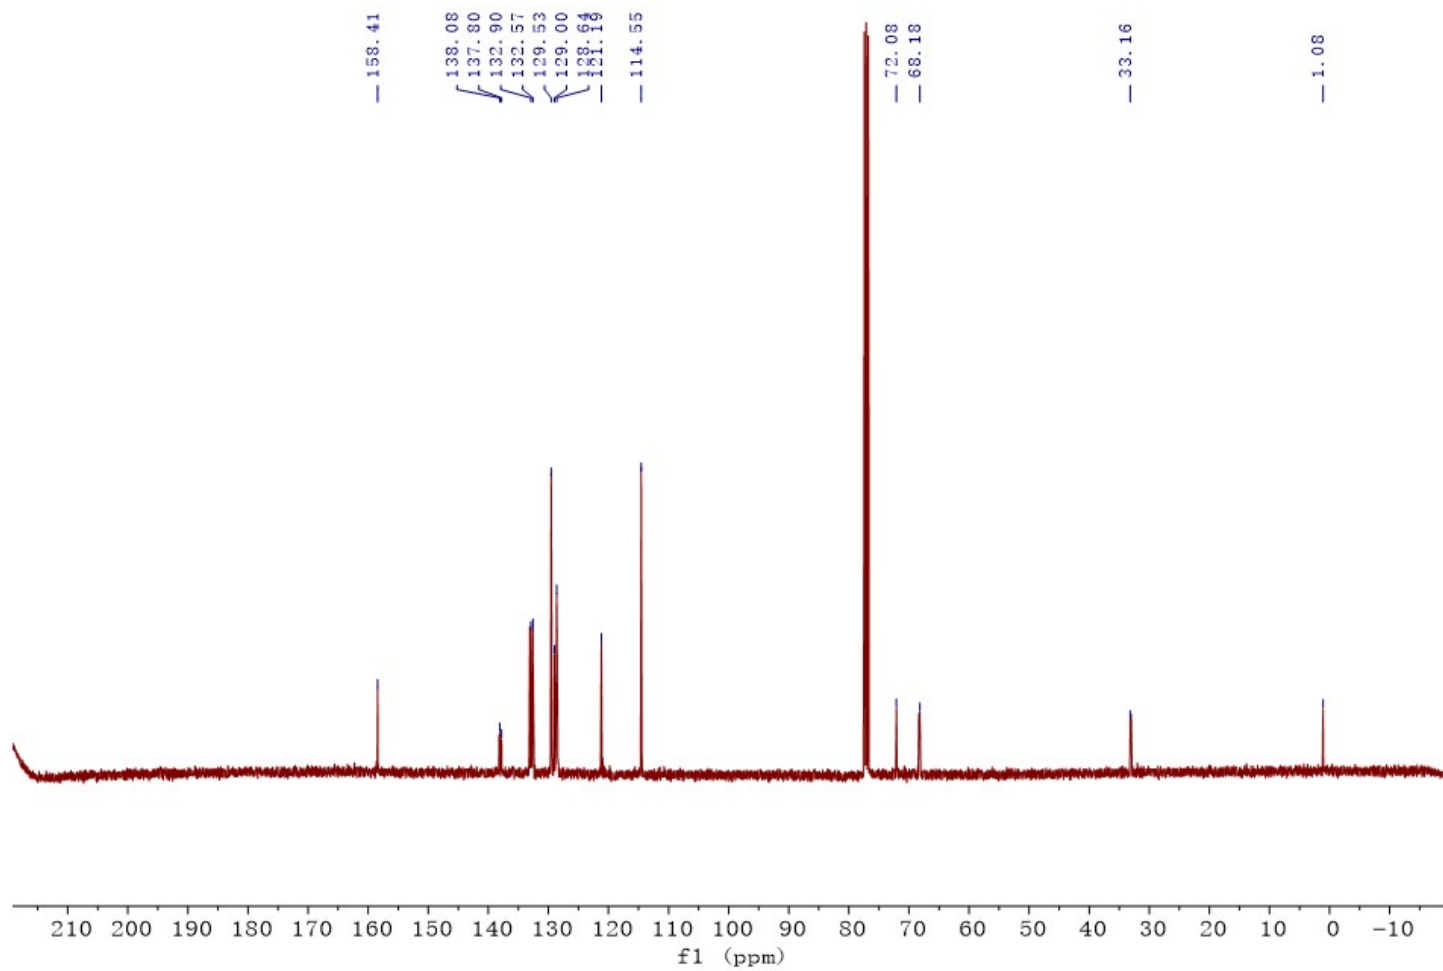

**Fig. S40.**  $^{13}\text{C}$  NMR spectrum of **3a** in  $\text{CDCl}_3$



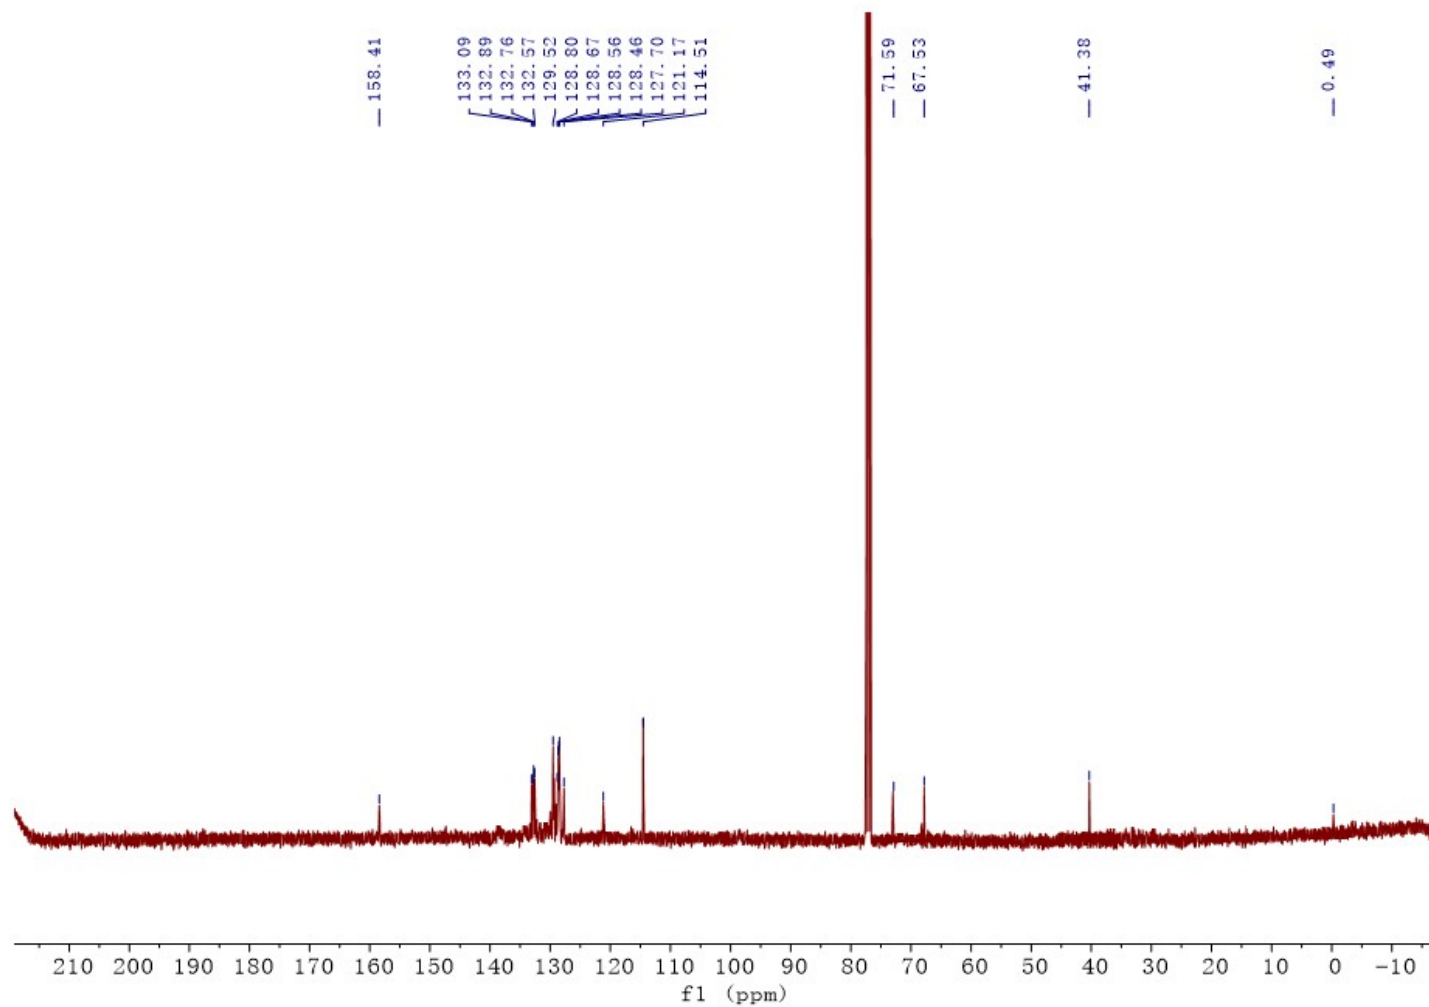

**Fig. S41.**  $^{13}\text{C}$  NMR spectrum of **3b** in  $\text{CDCl}_3$

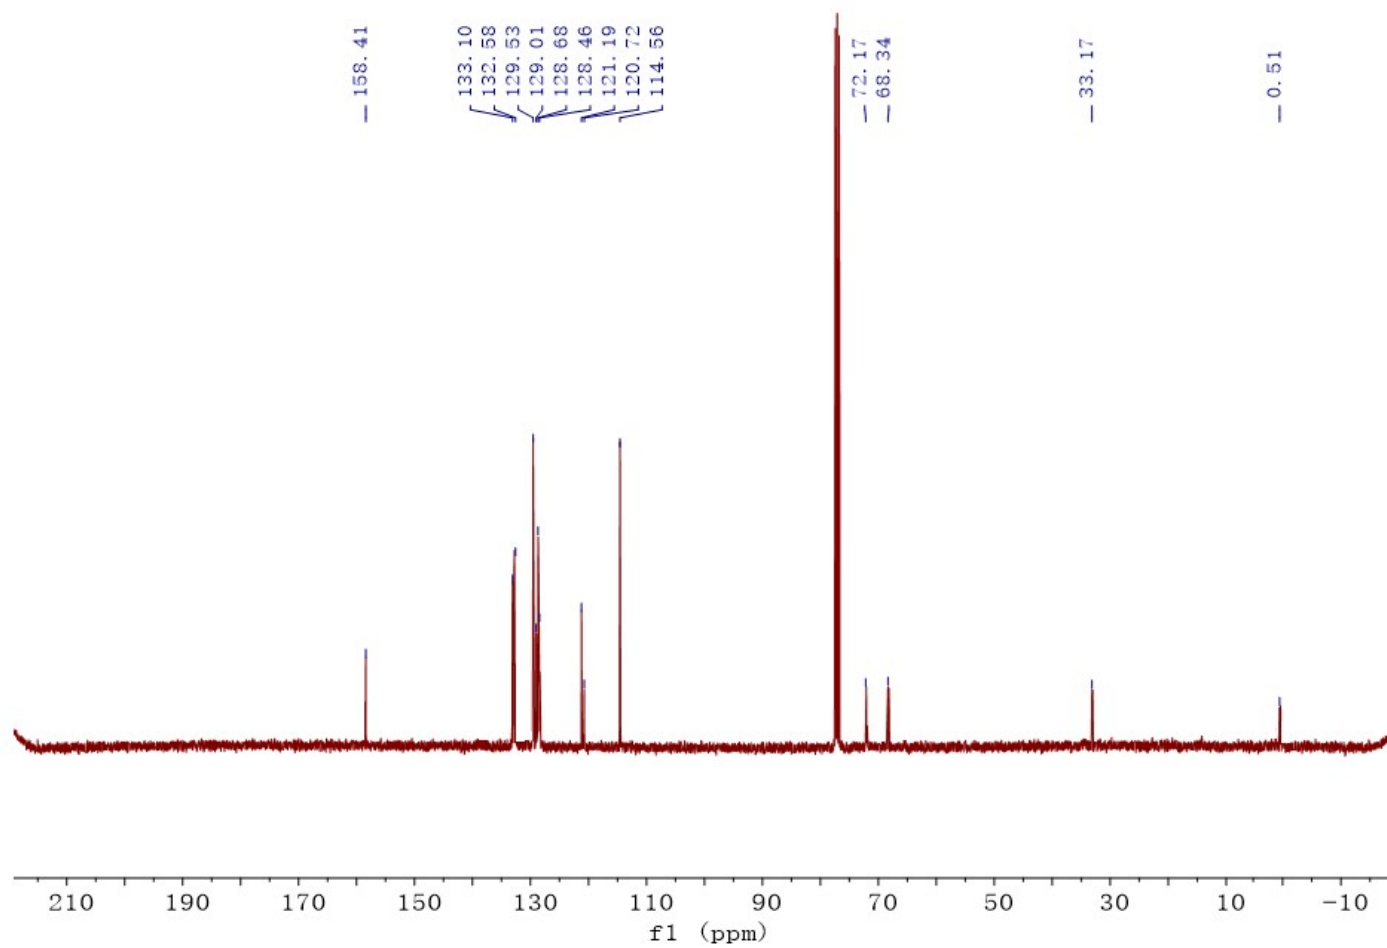

**Fig. S42.**  $^{13}\text{C}$  NMR spectrum of **3c** in  $\text{CDCl}_3$

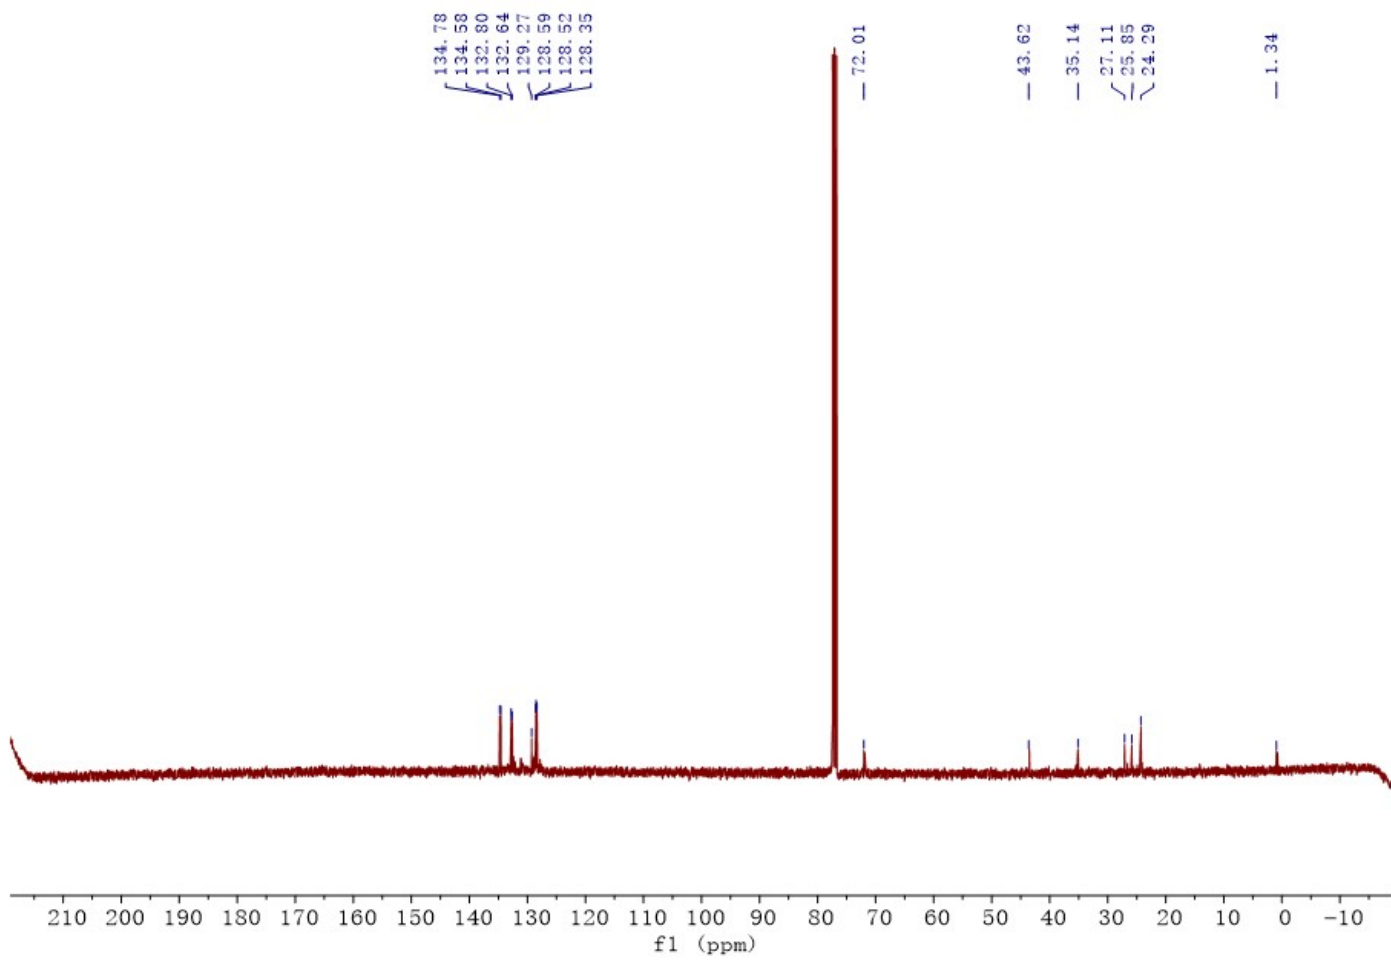

Fig. S43.  $^{13}\text{C}$  NMR spectrum of **4a** in  $\text{CDCl}_3$

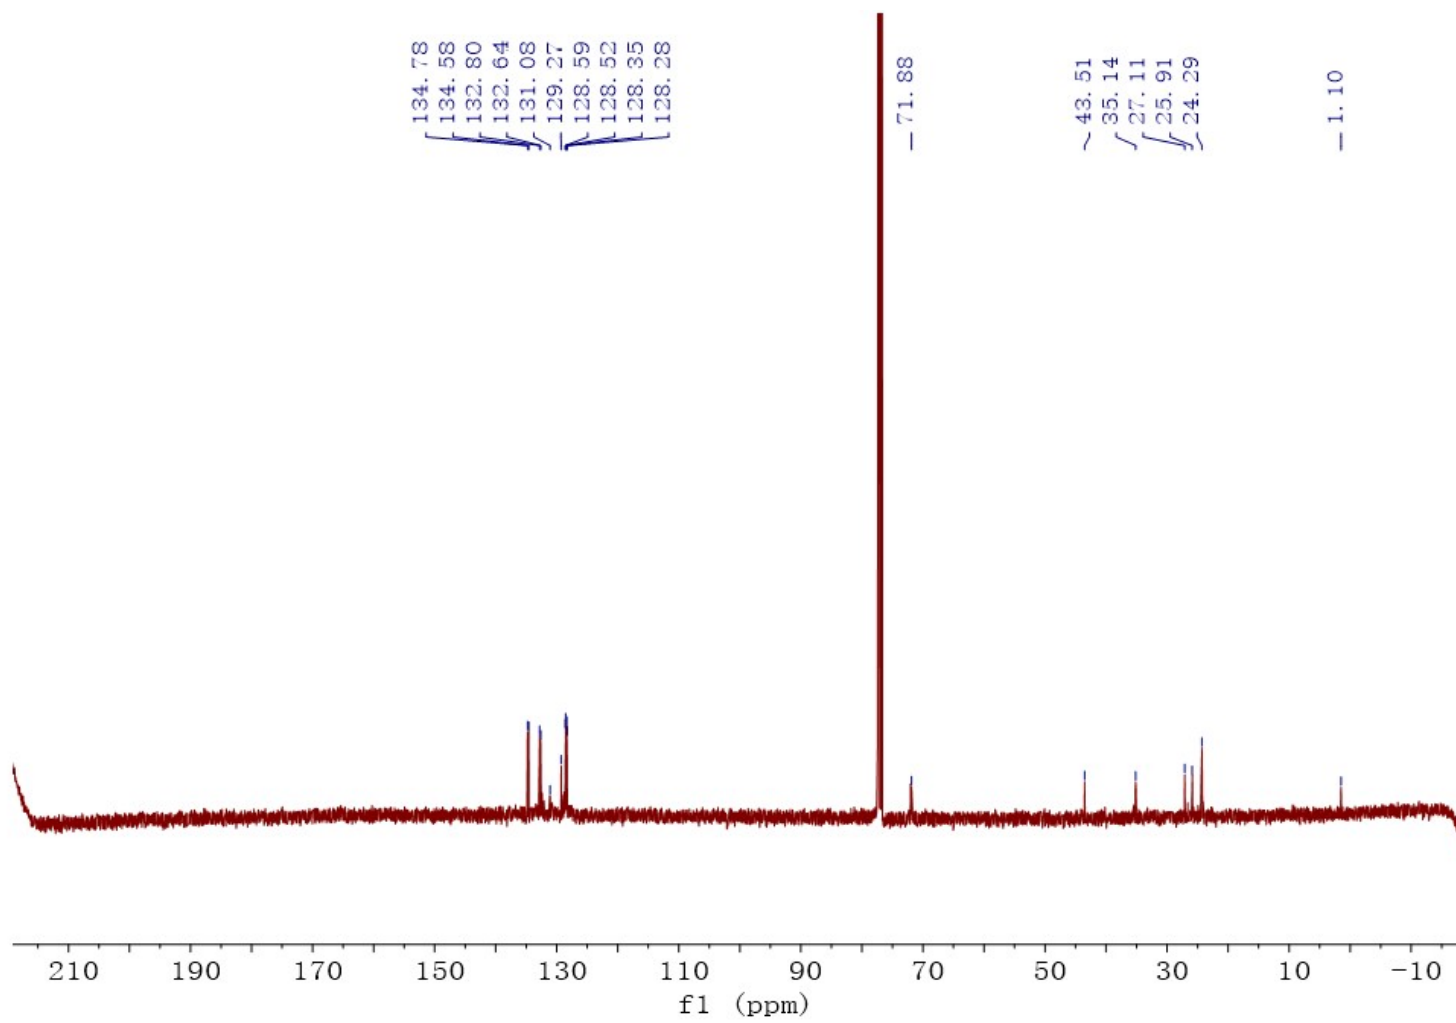

**Fig. S44.**  $^{13}\text{C}$  NMR spectrum of **4b** in  $\text{CDCl}_3$

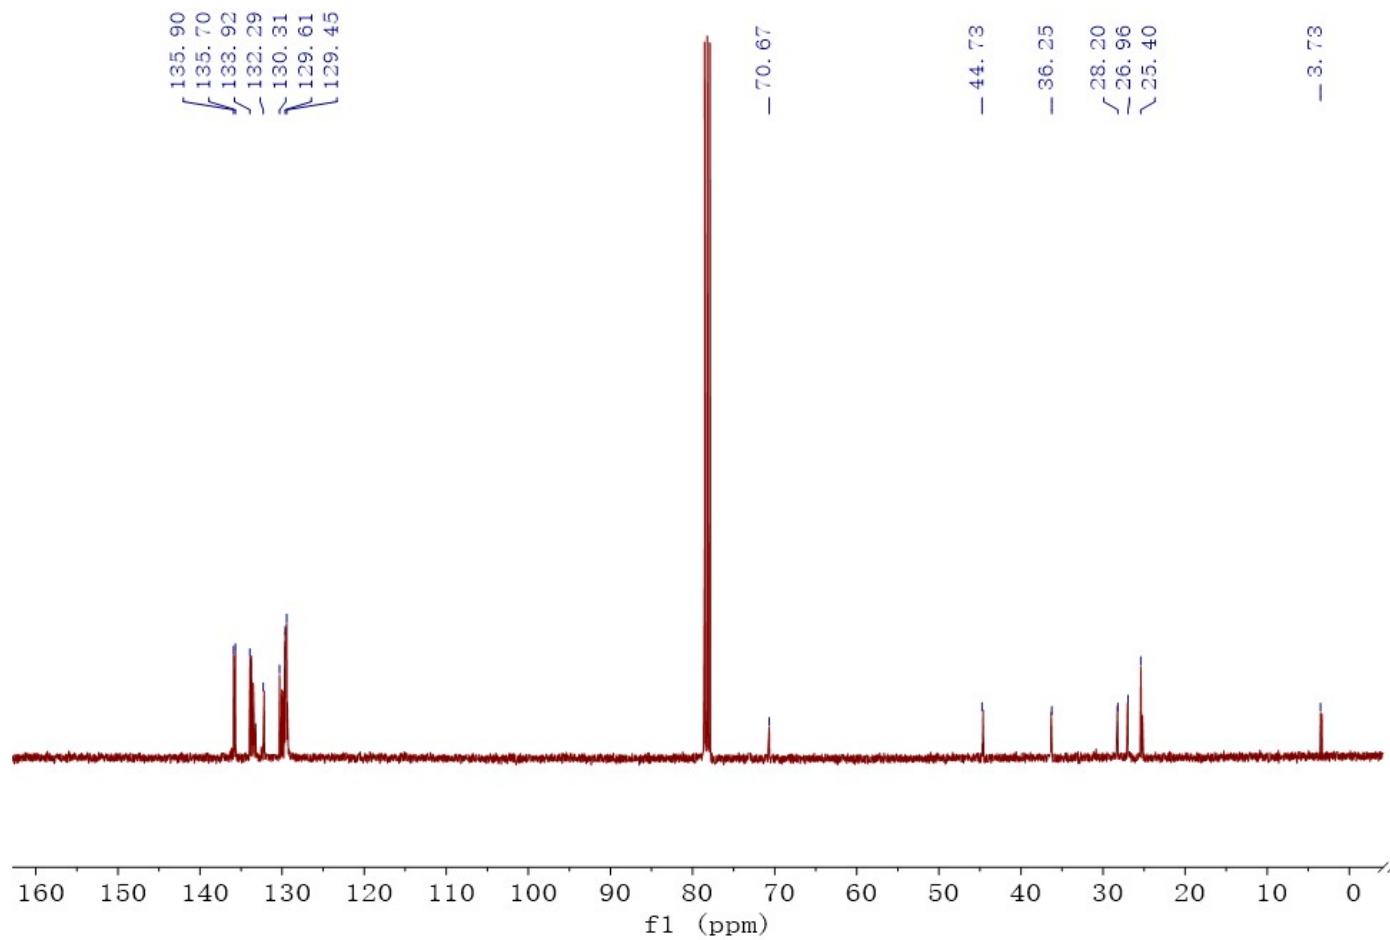

**Fig. S45.**  $^{13}\text{C}$  NMR spectrum of **4c** in  $\text{CDCl}_3$

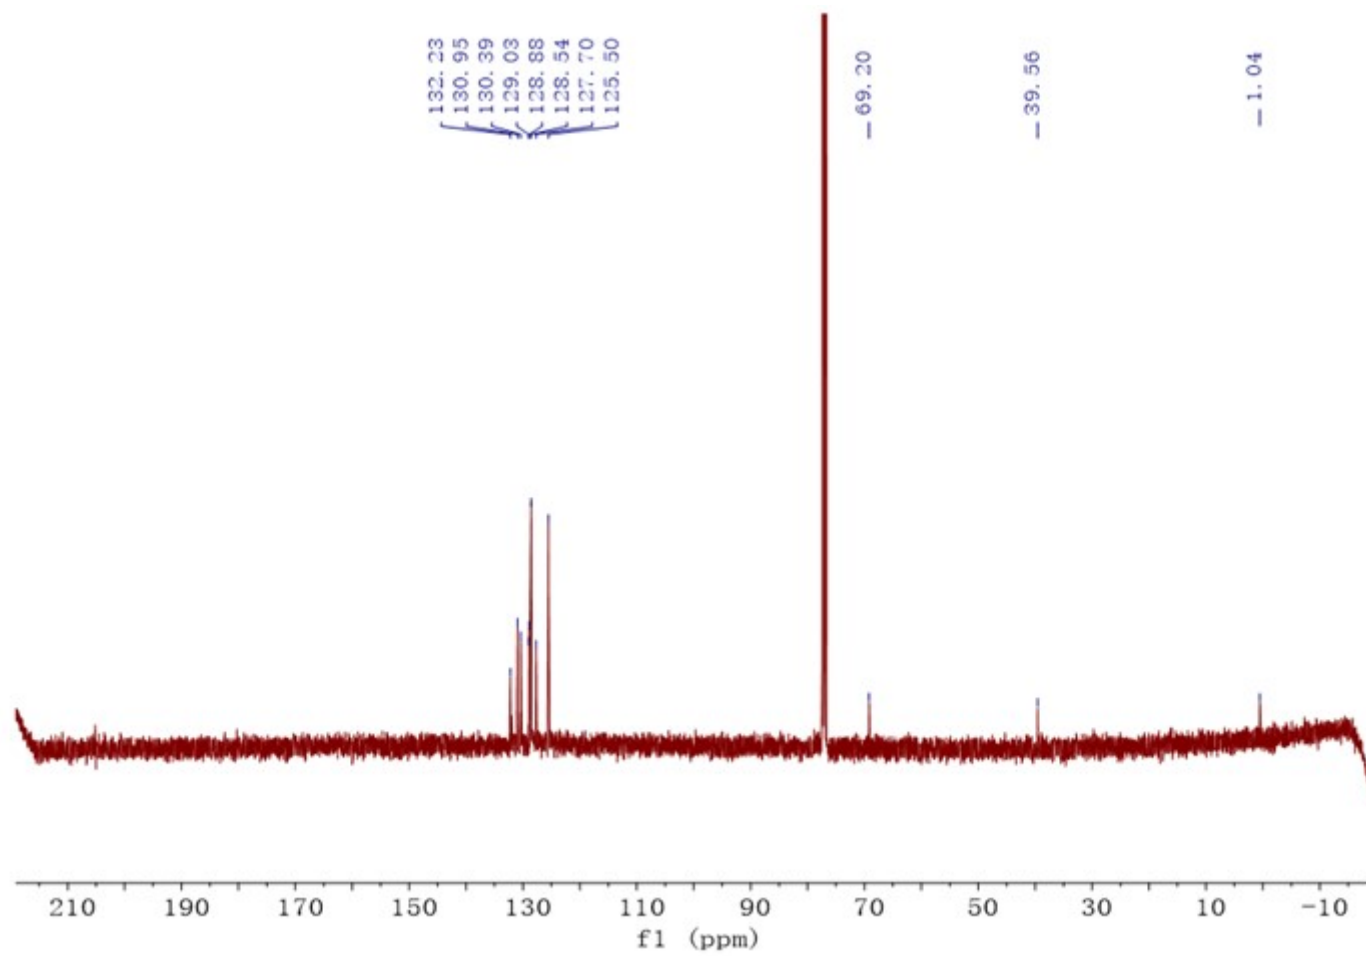

Fig. S46.  $^{13}\text{C}$  NMR spectrum of **5a** in  $\text{CDCl}_3$

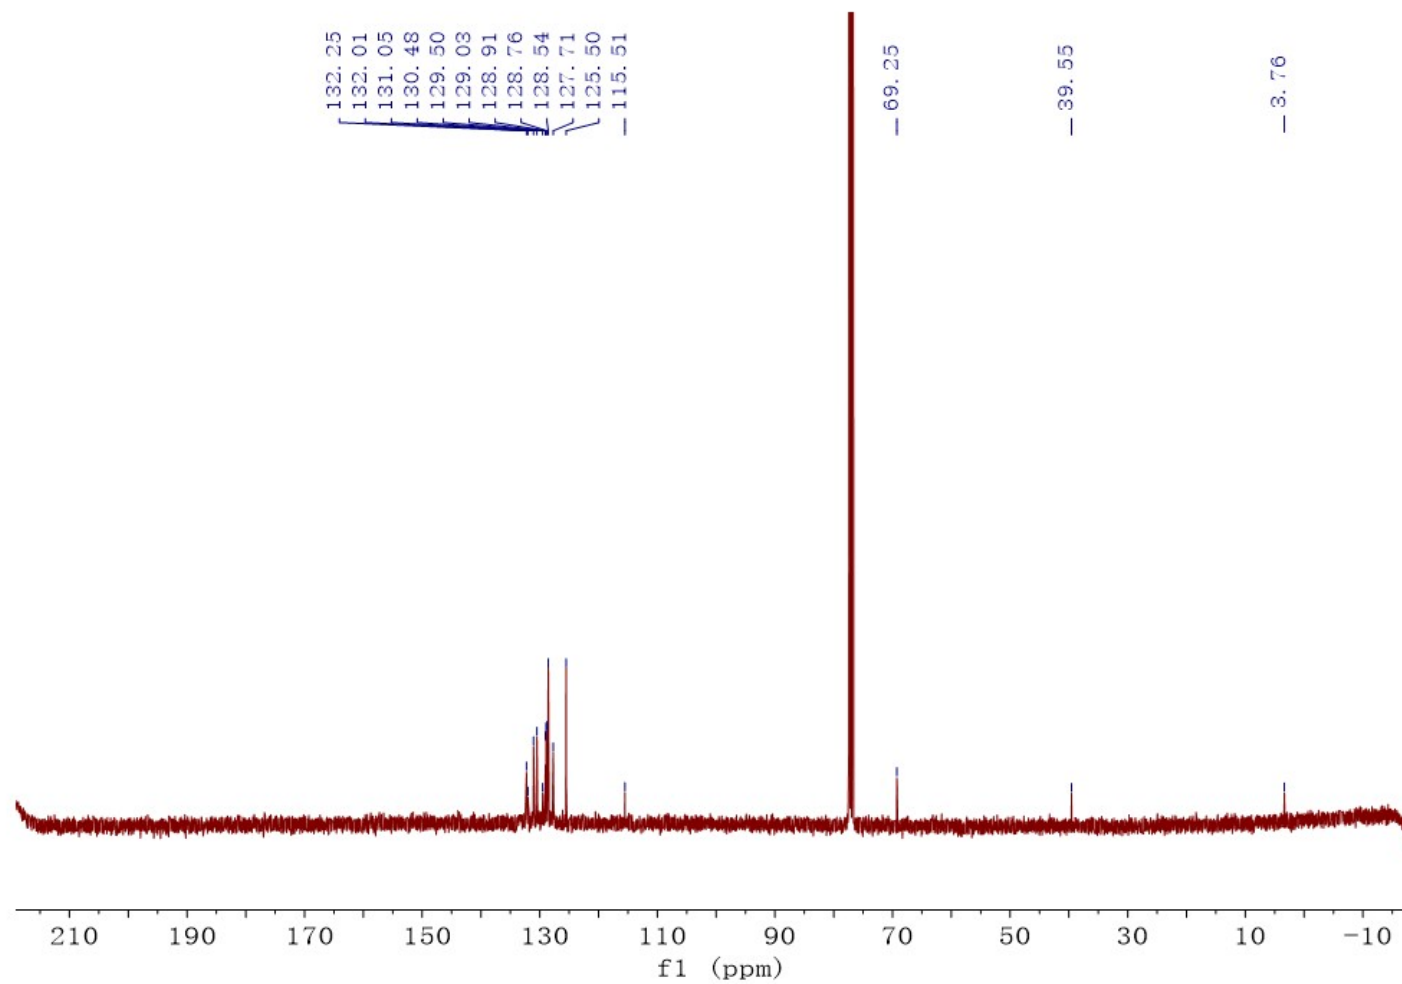

**Fig. 47.**  $^{13}\text{C}$  NMR spectrum of **5b** in  $\text{CDCl}_3$

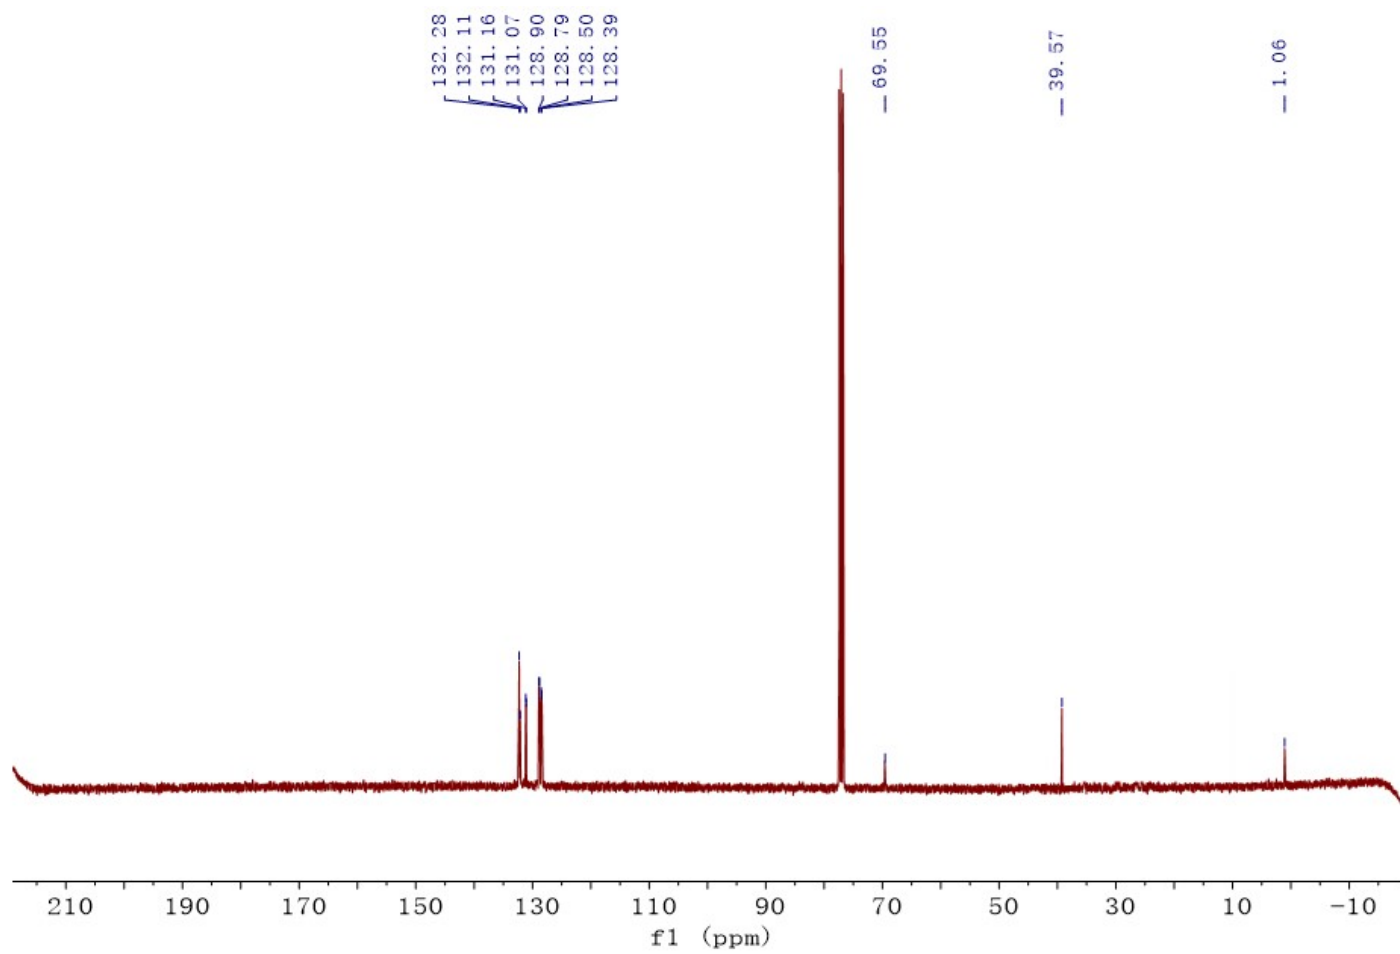

**Fig. S48.**  $^{13}\text{C}$  NMR spectrum of **5c** in  $\text{CDCl}_3$



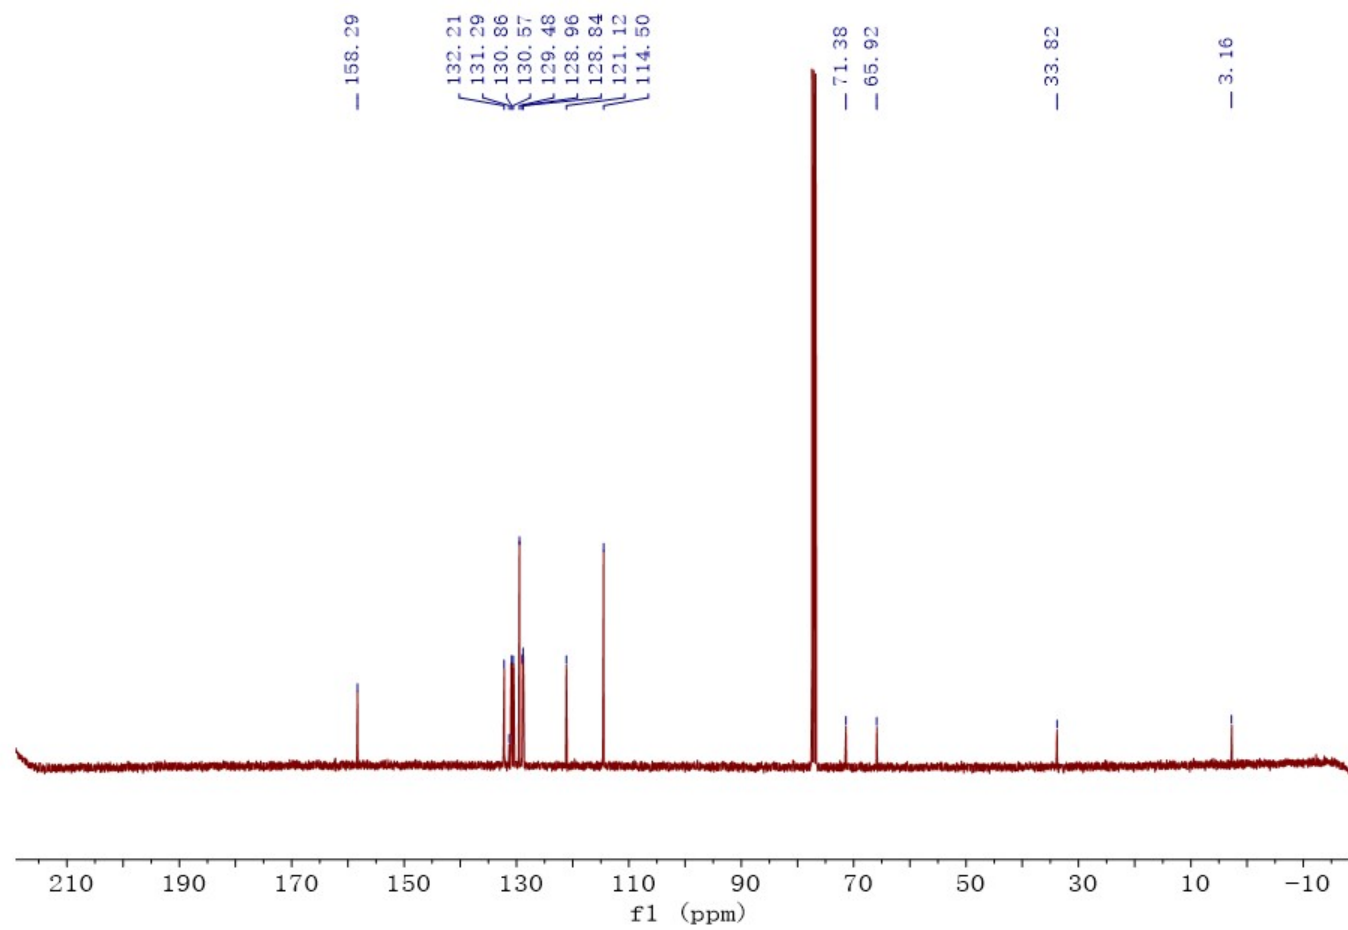

**Fig. S49.**  $^{13}\text{C}$  NMR spectrum of **6a** in  $\text{CDCl}_3$

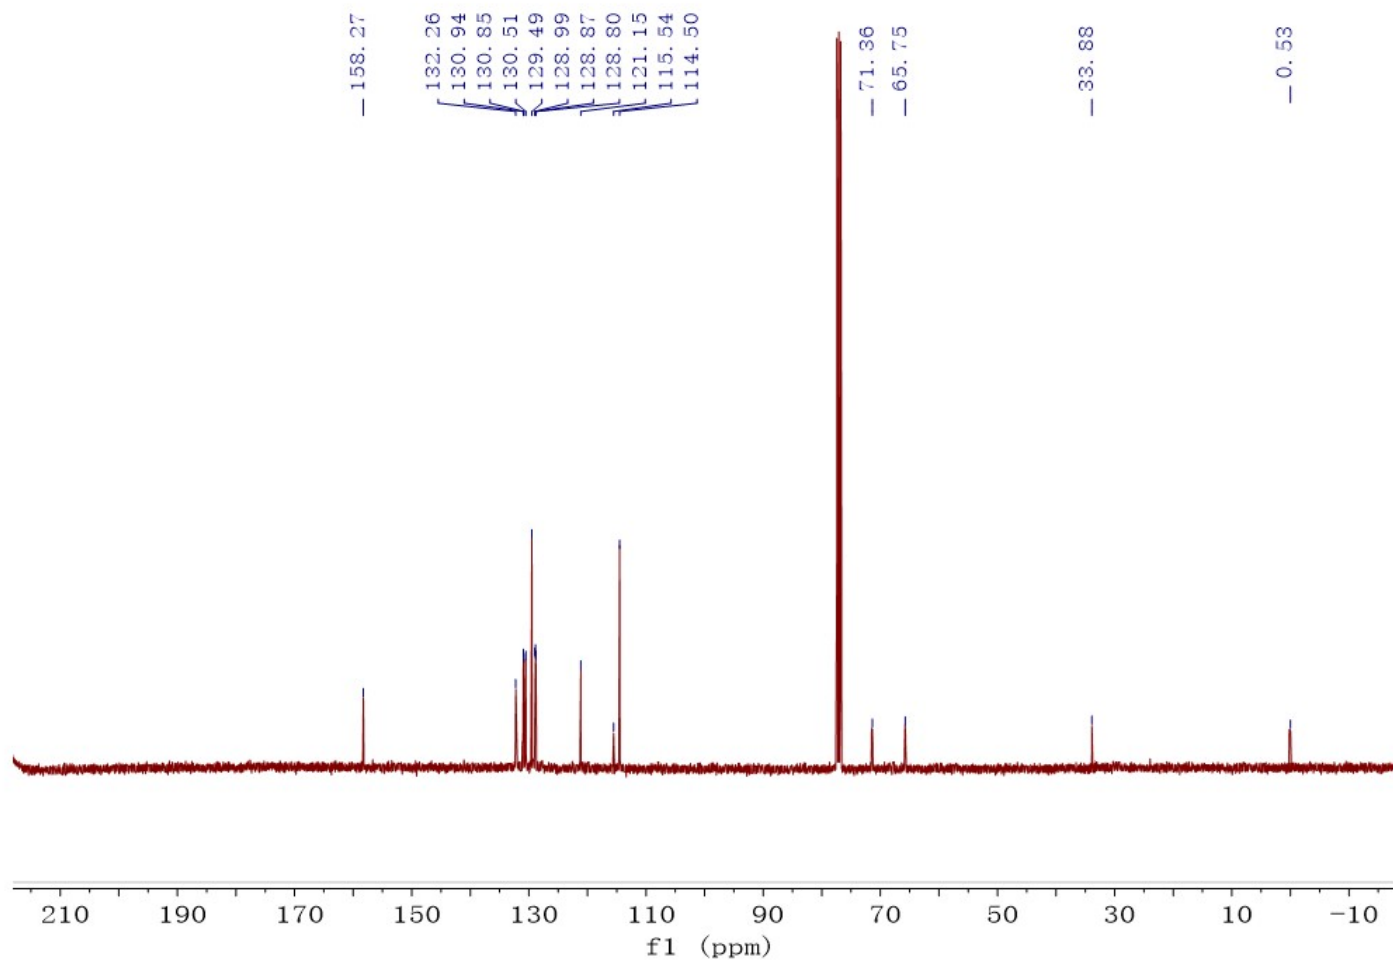

**Fig. S50.**  $^{13}\text{C}$  NMR spectrum of **6b** in  $\text{CDCl}_3$

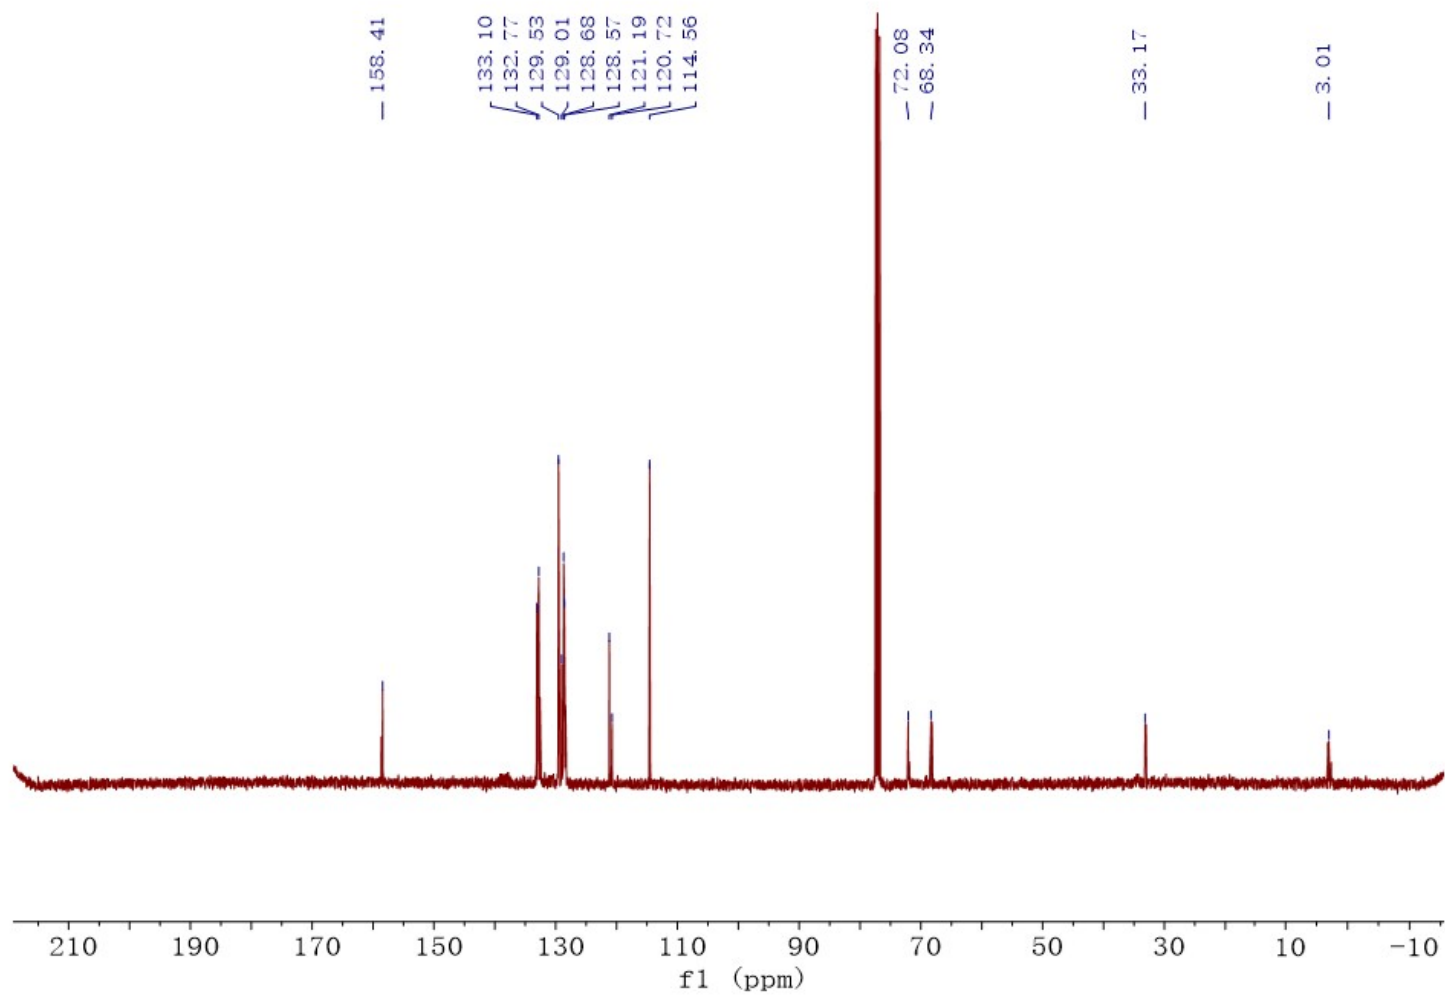

**Fig. S51.**  $^{13}\text{C}$  NMR spectrum of **6c** in  $\text{CDCl}_3$

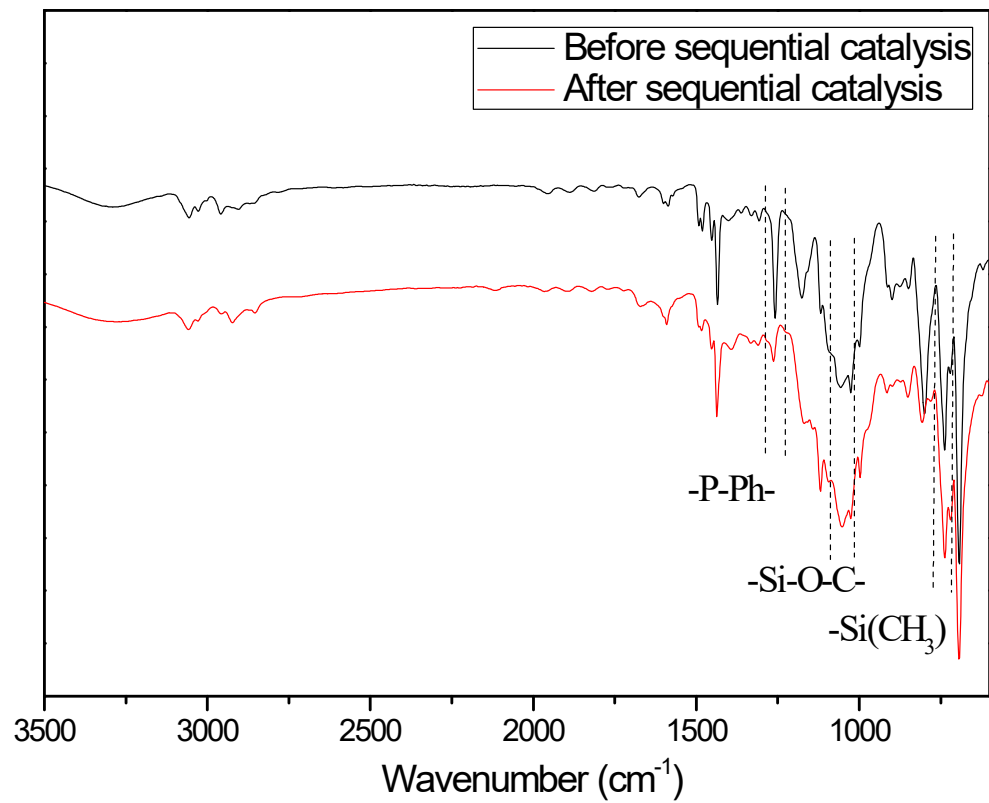

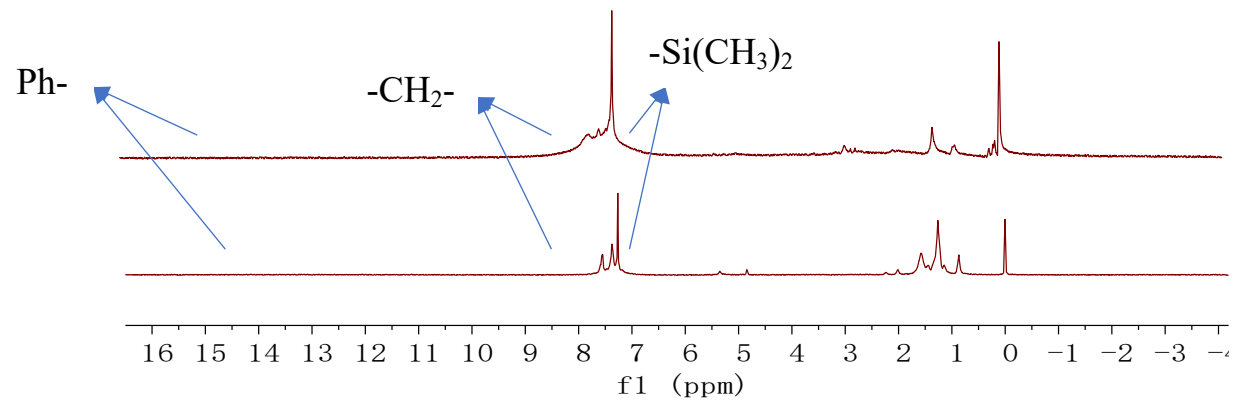

Supplement: d4ob00333k3.pdf [file d4ob00333k3.pdf]
