# Supplementary material for: Siloxane-containing phosphine (oxide) ligands for enhanced catalytic activity of cobalt complexes for hydrosilylation reactions
Source: Royal Society of Chemistry journal article supplement (doi:10.1039/d4ob00333k), 2024-01-01
Supplement: d4ob00333k2.zip [file d4ob00333k2.zip]

Archive with 4 entries (4 files):
- checkcif-nicl-2a.pdf
- checkcif-nicl-2b.pdf
- NiCl2-2a.cif
- NiCl2-2b.cif
