# Supplementary material for: Siloxane-containing phosphine (oxide) ligands for enhanced catalytic activity of cobalt complexes for hydrosilylation reactions
Source: Royal Society of Chemistry journal article supplement (doi:10.1039/d4ob00333k), 2024-01-01
Supplement: d4ob00333k2.zip [file d4ob00333k2.zip › NiCl2-2a.cif]

data_mo221124a
_audit_creation_date               2022-11-28
_audit_creation_method
;
Olex2 1.5
(compiled 2021.11.18 svn.ra9532c28 for OlexSys, GUI svn.r6427)
;
_shelx_SHELXL_version_number       '2018/3'
_audit_contact_author_address      ?
_audit_contact_author_email        ?
_audit_contact_author_name         ''
_audit_contact_author_phone        ?
_publ_contact_author_id_orcid      ?
_publ_section_references
;
Dolomanov, O.V., Bourhis, L.J., Gildea, R.J, Howard, J.A.K. & Puschmann, H.
 (2009), J. Appl. Cryst. 42, 339-341.

Sheldrick, G.M. (2015). Acta Cryst. A71, 3-8.

Sheldrick, G.M. (2015). Acta Cryst. C71, 3-8.
;
_chemical_name_common              ?
_chemical_name_systematic          ?
_chemical_formula_moiety           'C42 H42 Cl2 Ni O2 P2 Si, C H2 Cl2'
_chemical_formula_sum              'C43 H44 Cl4 Ni O2 P2 Si'
_chemical_formula_weight           883.32
_chemical_melting_point            ?
loop_
  _atom_type_symbol
  _atom_type_description
  _atom_type_scat_dispersion_real
  _atom_type_scat_dispersion_imag
  _atom_type_scat_source
 'C' 'C' 0.0033 0.0016 'International Tables Vol C Tables 4.2.6.8 and 6.1.1.4'
 'H' 'H' 0.0000 0.0000 'International Tables Vol C Tables 4.2.6.8 and 6.1.1.4'
 'Cl' 'Cl' 0.1484 0.1585 'International Tables Vol C Tables 4.2.6.8 and 6.1.1.4'
 'Ni' 'Ni' 0.3393 1.1124 'International Tables Vol C Tables 4.2.6.8 and 6.1.1.4'
 'O' 'O' 0.0106 0.0060 'International Tables Vol C Tables 4.2.6.8 and 6.1.1.4'
 'P' 'P' 0.1023 0.0942 'International Tables Vol C Tables 4.2.6.8 and 6.1.1.4'
 'Si' 'Si' 0.0817 0.0704 'International Tables Vol C Tables 4.2.6.8 and 6.1.1.4'

_shelx_space_group_comment
;
The symmetry employed for this shelxl refinement is uniquely defined
by the following loop, which should always be used as a source of
symmetry information in preference to the above space-group names.
They are only intended as comments.
;
_space_group_crystal_system        'triclinic'
_space_group_IT_number             2
_space_group_name_H-M_alt          'P -1'
_space_group_name_Hall             '-P 1'
loop_
  _space_group_symop_operation_xyz
 'x, y, z'
 '-x, -y, -z'

_cell_length_a                     11.359(3)
_cell_length_b                     13.185(3)
_cell_length_c                     16.123(4)
_cell_angle_alpha                  76.717(5)
_cell_angle_beta                   75.085(5)
_cell_angle_gamma                  69.919(5)
_cell_volume                       2164.8(9)
_cell_formula_units_Z              2
_cell_measurement_reflns_used      3238
_cell_measurement_temperature      296.15
_cell_measurement_theta_max        21.814
_cell_measurement_theta_min        2.283
_shelx_estimated_absorpt_T_max     0.936
_shelx_estimated_absorpt_T_min     0.907
_exptl_absorpt_coefficient_mu      0.831
_exptl_absorpt_correction_T_max    1.0000
_exptl_absorpt_correction_T_min    0.9056
_exptl_absorpt_correction_type     multi-scan
_exptl_absorpt_process_details
;
SADABS-2016/2 (Bruker,2016/2) was used for absorption correction.
wR2(int) was 0.0638 before and 0.0543 after correction.
The Ratio of minimum to maximum transmission is 0.9056.
The \l/2 correction factor is 0.00150.
;
_exptl_absorpt_special_details     ?
_exptl_crystal_colour              violet
_exptl_crystal_colour_primary      violet
_exptl_crystal_density_diffrn      1.355
_exptl_crystal_density_meas        ?
_exptl_crystal_density_method      ?
_exptl_crystal_description         block
_exptl_crystal_F_000               916
_exptl_crystal_size_max            0.12
_exptl_crystal_size_mid            0.12
_exptl_crystal_size_min            0.08
_exptl_transmission_factor_max     ?
_exptl_transmission_factor_min     ?
_diffrn_reflns_av_R_equivalents    0.0715
_diffrn_reflns_av_unetI/netI       0.1396
_diffrn_reflns_Laue_measured_fraction_full  1.000
_diffrn_reflns_Laue_measured_fraction_max  0.892
_diffrn_reflns_limit_h_max         16
_diffrn_reflns_limit_h_min         -15
_diffrn_reflns_limit_k_max         18
_diffrn_reflns_limit_k_min         -18
_diffrn_reflns_limit_l_max         21
_diffrn_reflns_limit_l_min         -22
_diffrn_reflns_number              24731
_diffrn_reflns_point_group_measured_fraction_full  1.000
_diffrn_reflns_point_group_measured_fraction_max  0.892
_diffrn_reflns_theta_full          25.242
_diffrn_reflns_theta_max           30.478
_diffrn_reflns_theta_min           1.323
_diffrn_ambient_temperature        296.15
_diffrn_detector_area_resol_mean   ?
_diffrn_measured_fraction_theta_full  1.000
_diffrn_measured_fraction_theta_max  0.892
_diffrn_measurement_device_type    'Bruker APEX-II CCD'
_diffrn_measurement_method         '\f and \w scans'
_diffrn_radiation_type             MoK\a
_diffrn_radiation_wavelength       0.71073
_diffrn_source                     ?
_diffrn_source_current             30.0
_diffrn_source_power               1.35
_diffrn_source_voltage             45.0
_diffrn_standards_number           0
_reflns_Friedel_coverage           0.000
_reflns_Friedel_fraction_full      .
_reflns_Friedel_fraction_max       .
_reflns_number_gt                  4896
_reflns_number_total               11764
_reflns_special_details
;
 Reflections were merged by SHELXL according to the crystal
 class for the calculation of statistics and refinement.
 
 _reflns_Friedel_fraction is defined as the number of unique
 Friedel pairs measured divided by the number that would be
 possible theoretically, ignoring centric projections and
 systematic absences.
;
_reflns_threshold_expression       'I > 2\s(I)'
_computing_cell_refinement         'SAINT v8.37A (Bruker, 2015)'
_computing_data_collection         ?
_computing_data_reduction          'SAINT v8.37A (Bruker, 2015)'
_computing_molecular_graphics      'Olex2 1.5 (Dolomanov et al., 2009)'
_computing_publication_material    'Olex2 1.5 (Dolomanov et al., 2009)'
_computing_structure_refinement    'SHELXL 2018/3 (Sheldrick, 2015)'
_computing_structure_solution      'SHELXT 2014/5 (Sheldrick, 2014)'
_refine_diff_density_max           0.636
_refine_diff_density_min           -0.531
_refine_diff_density_rms           0.064
_refine_ls_extinction_coef         .
_refine_ls_extinction_method       none
_refine_ls_goodness_of_fit_ref     0.838
_refine_ls_hydrogen_treatment      constr
_refine_ls_matrix_type             full
_refine_ls_number_parameters       478
_refine_ls_number_reflns           11764
_refine_ls_number_restraints       3
_refine_ls_R_factor_all            0.1394
_refine_ls_R_factor_gt             0.0527
_refine_ls_restrained_S_all        0.839
_refine_ls_shift/su_max            0.001
_refine_ls_shift/su_mean           0.000
_refine_ls_structure_factor_coef   Fsqd
_refine_ls_weighting_details      
 'w=1/[\s^2^(Fo^2^)+(0.0387P)^2^] where P=(Fo^2^+2Fc^2^)/3'
_refine_ls_weighting_scheme        calc
_refine_ls_wR_factor_gt            0.1011
_refine_ls_wR_factor_ref           0.1216
_refine_special_details            ?
_olex2_refinement_description
;
1. Fixed Uiso
 At 1.2 times of:
  All C(H) groups, All C(H,H) groups, All C(H,H,H,H) groups
 At 1.5 times of:
  All C(H,H,H) groups
2. Restrained distances
 O1-C43 \\sim O1-C35
 with sigma of 0.02
 C36-C43 \\sim C36-C35
 with sigma of 0.02
 C37-C43 \\sim C37-C35
 with sigma of 0.02
3. Others
 Sof(C35)=Sof(H35)=Sof(H36C)=Sof(H36D)=1-FVAR(1)
 Sof(H36A)=Sof(H36B)=Sof(C43)=Sof(H43)=FVAR(1)
4.a Ternary CH refined with riding coordinates:
 C1(H1), C35(H35), C43(H43)
4.b Secondary CH2 refined with riding coordinates:
 C2(H2A,H2B), C36(H36A,H36B), C36(H36C,H36D), C44(H44A,H44B)
4.c Aromatic/amide H refined with riding coordinates:
 C4(H4), C5(H5), C6(H6), C7(H7), C8(H8), C12(H12), C13(H13), C14(H14),
 C15(H15), C16(H16), C18(H18), C19(H19), C20(H20), C21(H21), C22(H22), C24(H24),
  C25(H25), C26(H26), C27(H27), C28(H28), C30(H30), C31(H31), C32(H32),
 C33(H33), C34(H34), C38(H38), C39(H39), C40(H40), C41(H41), C42(H42)
4.d Fitted hexagon refined as free rotating group:
 C37(C38,C39,C40,C41,C42)
4.e Idealised Me refined as rotating group:
 C9(H9A,H9B,H9C), C10(H10A,H10B,H10C)
;
_atom_sites_solution_hydrogens     geom
_atom_sites_solution_primary       dual
_atom_sites_solution_secondary     ?
loop_
  _atom_site_label
  _atom_site_type_symbol
  _atom_site_fract_x
  _atom_site_fract_y
  _atom_site_fract_z
  _atom_site_U_iso_or_equiv
  _atom_site_adp_type
  _atom_site_occupancy
  _atom_site_site_symmetry_order
  _atom_site_calc_flag
  _atom_site_refinement_flags_posn
  _atom_site_refinement_flags_adp
  _atom_site_refinement_flags_occupancy
  _atom_site_disorder_assembly
  _atom_site_disorder_group
 Ni1 Ni 0.41233(4) 0.66549(3) 0.21089(3) 0.03813(13) Uani 1 1 d . . . . .
 Cl1 Cl 0.36235(8) 0.76769(8) 0.09317(6) 0.0599(3) Uani 1 1 d . . . . .
 Cl2 Cl 0.46872(8) 0.52702(7) 0.31221(5) 0.0526(2) Uani 1 1 d . . . . .
 P1 P 0.61622(8) 0.66256(7) 0.16495(5) 0.0399(2) Uani 1 1 d . . . . .
 P2 P 0.20823(8) 0.68046(7) 0.27093(6) 0.0419(2) Uani 1 1 d . . . . .
 Si1 Si 0.37799(9) 0.88964(8) 0.35033(6) 0.0422(2) Uani 1 1 d . . . . .
 O1 O 0.5054(2) 0.8030(2) 0.30642(14) 0.0629(7) Uani 1 1 d D . . . .
 O2 O 0.2619(2) 0.8362(2) 0.36538(13) 0.0575(7) Uani 1 1 d . . . . .
 C1 C 0.2504(4) 0.7401(3) 0.4187(2) 0.0610(10) Uani 1 1 d . . . . .
 H1 H 0.336019 0.687047 0.413878 0.073 Uiso 1 1 calc R U . . .
 C2 C 0.1667(3) 0.6926(3) 0.38728(19) 0.0494(9) Uani 1 1 d . . . . .
 H2A H 0.078760 0.738330 0.400032 0.059 Uiso 1 1 calc R U . . .
 H2B H 0.171106 0.620625 0.420717 0.059 Uiso 1 1 calc R U . . .
 C3 C 0.2020(4) 0.7534(3) 0.5135(2) 0.0512(9) Uani 1 1 d . . . . .
 C4 C 0.0971(4) 0.8390(3) 0.5393(2) 0.0637(11) Uani 1 1 d . . . . .
 H4 H 0.052922 0.889421 0.498588 0.076 Uiso 1 1 calc R U . . .
 C5 C 0.0580(4) 0.8489(4) 0.6271(3) 0.0741(12) Uani 1 1 d . . . . .
 H5 H -0.011900 0.906519 0.645659 0.089 Uiso 1 1 calc R U . . .
 C6 C 0.1243(5) 0.7722(4) 0.6862(3) 0.0790(14) Uani 1 1 d . . . . .
 H6 H 0.098947 0.778900 0.744864 0.095 Uiso 1 1 calc R U . . .
 C7 C 0.2231(5) 0.6893(4) 0.6611(3) 0.0742(12) Uani 1 1 d . . . . .
 H7 H 0.265496 0.637706 0.702195 0.089 Uiso 1 1 calc R U . . .
 C8 C 0.2636(4) 0.6788(3) 0.5749(3) 0.0632(11) Uani 1 1 d . . . . .
 H8 H 0.333661 0.620399 0.557916 0.076 Uiso 1 1 calc R U . . .
 C9 C 0.3360(4) 1.0142(3) 0.2718(2) 0.0687(11) Uani 1 1 d . . . . .
 H9A H 0.316374 0.997365 0.223009 0.103 Uiso 1 1 calc R U . . .
 H9B H 0.406744 1.043533 0.252282 0.103 Uiso 1 1 calc R U . . .
 H9C H 0.262871 1.067067 0.298807 0.103 Uiso 1 1 calc R U . . .
 C10 C 0.3954(4) 0.9181(3) 0.4524(2) 0.0692(12) Uani 1 1 d . . . . .
 H10A H 0.316815 0.967591 0.477544 0.104 Uiso 1 1 calc R U . . .
 H10B H 0.462957 0.950591 0.440626 0.104 Uiso 1 1 calc R U . . .
 H10C H 0.415429 0.851109 0.492218 0.104 Uiso 1 1 calc R U . . .
 C11 C 0.1638(3) 0.5603(3) 0.2694(2) 0.0483(9) Uani 1 1 d . . . . .
 C12 C 0.0529(4) 0.5418(3) 0.3215(2) 0.0658(11) Uani 1 1 d . . . . .
 H12 H 0.000015 0.590179 0.359198 0.079 Uiso 1 1 calc R U . . .
 C13 C 0.0212(5) 0.4505(4) 0.3170(3) 0.0832(14) Uani 1 1 d . . . . .
 H13 H -0.051740 0.436310 0.352811 0.100 Uiso 1 1 calc R U . . .
 C14 C 0.0974(6) 0.3824(4) 0.2599(4) 0.0960(17) Uani 1 1 d . . . . .
 H14 H 0.074691 0.322291 0.256501 0.115 Uiso 1 1 calc R U . . .
 C15 C 0.2054(5) 0.3989(4) 0.2079(3) 0.0948(16) Uani 1 1 d . . . . .
 H15 H 0.256370 0.350522 0.169766 0.114 Uiso 1 1 calc R U . . .
 C16 C 0.2392(4) 0.4886(3) 0.2120(3) 0.0685(11) Uani 1 1 d . . . . .
 H16 H 0.312941 0.500843 0.175972 0.082 Uiso 1 1 calc R U . . .
 C17 C 0.0873(3) 0.7909(3) 0.2218(2) 0.0451(8) Uani 1 1 d . . . . .
 C18 C 0.0564(4) 0.8963(3) 0.2357(3) 0.0782(13) Uani 1 1 d . . . . .
 H18 H 0.094034 0.911679 0.274256 0.094 Uiso 1 1 calc R U . . .
 C19 C -0.0303(5) 0.9803(4) 0.1930(3) 0.1042(18) Uani 1 1 d . . . . .
 H19 H -0.048985 1.051472 0.202753 0.125 Uiso 1 1 calc R U . . .
 C20 C -0.0881(4) 0.9607(4) 0.1377(3) 0.0833(14) Uani 1 1 d . . . . .
 H20 H -0.147591 1.017553 0.110441 0.100 Uiso 1 1 calc R U . . .
 C21 C -0.0584(4) 0.8574(4) 0.1222(3) 0.0794(13) Uani 1 1 d . . . . .
 H21 H -0.096299 0.843108 0.083263 0.095 Uiso 1 1 calc R U . . .
 C22 C 0.0279(4) 0.7731(3) 0.1642(2) 0.0666(11) Uani 1 1 d . . . . .
 H22 H 0.046602 0.702338 0.153323 0.080 Uiso 1 1 calc R U . . .
 C23 C 0.7141(3) 0.5385(3) 0.1205(2) 0.0483(9) Uani 1 1 d . . . . .
 C24 C 0.8423(4) 0.4920(3) 0.1240(2) 0.0703(12) Uani 1 1 d . . . . .
 H24 H 0.880819 0.522978 0.151664 0.084 Uiso 1 1 calc R U . . .
 C25 C 0.9131(5) 0.4000(4) 0.0865(3) 0.1029(18) Uani 1 1 d . . . . .
 H25 H 0.999252 0.369130 0.089162 0.123 Uiso 1 1 calc R U . . .
 C26 C 0.8582(6) 0.3542(4) 0.0458(3) 0.105(2) Uani 1 1 d . . . . .
 H26 H 0.906898 0.291608 0.021408 0.126 Uiso 1 1 calc R U . . .
 C27 C 0.7327(6) 0.3986(4) 0.0402(3) 0.1002(17) Uani 1 1 d . . . . .
 H27 H 0.696143 0.367750 0.010945 0.120 Uiso 1 1 calc R U . . .
 C28 C 0.6593(4) 0.4912(3) 0.0790(3) 0.0779(13) Uani 1 1 d . . . . .
 H28 H 0.572968 0.521067 0.076719 0.093 Uiso 1 1 calc R U . . .
 C29 C 0.6567(3) 0.7702(3) 0.0807(2) 0.0397(8) Uani 1 1 d . . . . .
 C30 C 0.6081(4) 0.8772(3) 0.0938(2) 0.0633(11) Uani 1 1 d . . . . .
 H30 H 0.550320 0.894039 0.144939 0.076 Uiso 1 1 calc R U . . .
 C31 C 0.6418(4) 0.9606(3) 0.0338(2) 0.0634(11) Uani 1 1 d . . . . .
 H31 H 0.608772 1.032173 0.045101 0.076 Uiso 1 1 calc R U . . .
 C32 C 0.7241(4) 0.9372(3) -0.0425(2) 0.0600(10) Uani 1 1 d . . . . .
 H32 H 0.749342 0.992259 -0.083070 0.072 Uiso 1 1 calc R U . . .
 C33 C 0.7686(4) 0.8325(3) -0.0580(2) 0.0774(13) Uani 1 1 d . . . . .
 H33 H 0.821719 0.816817 -0.110960 0.093 Uiso 1 1 calc R U . . .
 C34 C 0.7372(4) 0.7491(3) 0.0024(2) 0.0660(11) Uani 1 1 d . . . . .
 H34 H 0.770429 0.677791 -0.009566 0.079 Uiso 1 1 calc R U . . .
 C35 C 0.5967(7) 0.7145(8) 0.3345(6) 0.041(3) Uani 0.446(10) 1 d D . P A 2
 H35 H 0.557603 0.660028 0.372134 0.049 Uiso 0.446(10) 1 calc R U P A 2
 C36 C 0.6909(3) 0.6649(3) 0.2530(2) 0.0444(8) Uani 1 1 d D . . . .
 H36A H 0.683034 0.603779 0.298624 0.053 Uiso 0.554(10) 1 calc R U P A 1
 H36B H 0.781305 0.655085 0.230568 0.053 Uiso 0.554(10) 1 calc R U P A 1
 H36C H 0.739443 0.590516 0.272641 0.053 Uiso 0.446(10) 1 calc R U P A 2
 H36D H 0.751075 0.706469 0.229200 0.053 Uiso 0.446(10) 1 calc R U P A 2
 C37 C 0.6793(2) 0.7415(3) 0.3826(2) 0.0671(12) Uani 1 1 d DG . . . .
 C38 C 0.6690(3) 0.6668(2) 0.4584(3) 0.0972(16) Uani 1 1 d G . . A .
 H38 H 0.625079 0.616888 0.463993 0.117 Uiso 1 1 calc R U . . .
 C39 C 0.7245(4) 0.6665(3) 0.52592(19) 0.120(2) Uani 1 1 d G . . A .
 H39 H 0.717684 0.616502 0.576666 0.145 Uiso 1 1 calc R U . . .
 C40 C 0.7902(3) 0.7411(3) 0.51758(19) 0.1058(19) Uani 1 1 d G . . A .
 H40 H 0.827347 0.740898 0.562749 0.127 Uiso 1 1 calc R U . . .
 C41 C 0.8004(2) 0.8158(3) 0.4417(3) 0.0875(15) Uani 1 1 d G . . A .
 H41 H 0.844406 0.865683 0.436158 0.105 Uiso 1 1 calc R U . . .
 C42 C 0.7450(3) 0.8160(2) 0.37423(17) 0.0680(11) Uani 1 1 d G . . A .
 H42 H 0.751801 0.866071 0.323483 0.082 Uiso 1 1 calc R U . . .
 C43 C 0.6332(6) 0.7683(6) 0.2912(5) 0.042(2) Uani 0.554(10) 1 d D . P A 1
 H43 H 0.666311 0.825869 0.252778 0.051 Uiso 0.554(10) 1 calc R U P A 1
 Cl3 Cl 0.5937(2) 0.1287(2) 0.31067(12) 0.1886(9) Uani 1 1 d . . . . .
 Cl4 Cl 0.53576(18) 0.22672(15) 0.14344(9) 0.1484(7) Uani 1 1 d . . . . .
 C44 C 0.5438(7) 0.2450(5) 0.2417(4) 0.182(3) Uani 1 1 d . . . . .
 H44A H 0.459761 0.287125 0.268650 0.218 Uiso 1 1 calc R U . . .
 H44B H 0.601341 0.288002 0.233482 0.218 Uiso 1 1 calc R U . . .

loop_
  _atom_site_aniso_label
  _atom_site_aniso_U_11
  _atom_site_aniso_U_22
  _atom_site_aniso_U_33
  _atom_site_aniso_U_23
  _atom_site_aniso_U_13
  _atom_site_aniso_U_12
 Ni1 0.0371(2) 0.0394(3) 0.0396(2) -0.00795(19) -0.00798(19) -0.0121(2)
 Cl1 0.0536(6) 0.0720(7) 0.0533(6) 0.0091(5) -0.0183(5) -0.0244(5)
 Cl2 0.0540(5) 0.0465(5) 0.0536(5) 0.0003(4) -0.0143(4) -0.0132(4)
 P1 0.0351(5) 0.0402(5) 0.0431(5) -0.0090(4) -0.0058(4) -0.0095(4)
 P2 0.0386(5) 0.0434(6) 0.0463(5) -0.0080(4) -0.0084(4) -0.0148(4)
 Si1 0.0409(5) 0.0451(6) 0.0432(6) -0.0121(5) -0.0070(4) -0.0137(5)
 O1 0.0420(14) 0.085(2) 0.0485(15) -0.0229(14) -0.0141(12) 0.0094(14)
 O2 0.0664(17) 0.0795(19) 0.0403(14) 0.0024(13) -0.0133(12) -0.0446(15)
 C1 0.075(3) 0.066(3) 0.051(2) -0.019(2) -0.001(2) -0.033(2)
 C2 0.045(2) 0.062(2) 0.046(2) -0.0149(18) 0.0007(16) -0.0251(19)
 C3 0.058(2) 0.064(3) 0.041(2) -0.016(2) 0.0022(19) -0.034(2)
 C4 0.068(3) 0.068(3) 0.051(2) -0.005(2) -0.010(2) -0.018(2)
 C5 0.066(3) 0.076(3) 0.075(3) -0.033(3) 0.014(2) -0.023(3)
 C6 0.116(4) 0.086(4) 0.045(3) -0.015(3) 0.002(3) -0.053(3)
 C7 0.091(4) 0.070(3) 0.073(3) -0.004(3) -0.020(3) -0.041(3)
 C8 0.060(3) 0.059(3) 0.073(3) -0.010(2) -0.007(2) -0.026(2)
 C9 0.064(3) 0.055(3) 0.079(3) -0.003(2) -0.010(2) -0.016(2)
 C10 0.069(3) 0.083(3) 0.067(3) -0.035(2) -0.008(2) -0.027(2)
 C11 0.048(2) 0.054(2) 0.049(2) -0.0028(18) -0.0152(17) -0.0215(19)
 C12 0.058(3) 0.071(3) 0.080(3) -0.003(2) -0.022(2) -0.033(2)
 C13 0.089(4) 0.092(4) 0.094(4) 0.011(3) -0.036(3) -0.063(3)
 C14 0.118(5) 0.074(4) 0.134(5) 0.003(3) -0.065(4) -0.059(4)
 C15 0.106(4) 0.080(4) 0.129(4) -0.042(3) -0.038(3) -0.039(3)
 C16 0.072(3) 0.068(3) 0.080(3) -0.026(2) -0.014(2) -0.031(2)
 C17 0.0357(18) 0.052(2) 0.047(2) -0.0063(18) -0.0081(16) -0.0132(17)
 C18 0.080(3) 0.051(3) 0.122(4) -0.019(3) -0.057(3) -0.011(2)
 C19 0.108(4) 0.053(3) 0.165(5) -0.027(3) -0.082(4) 0.005(3)
 C20 0.073(3) 0.068(3) 0.105(4) -0.015(3) -0.047(3) 0.006(3)
 C21 0.075(3) 0.090(4) 0.076(3) -0.022(3) -0.041(2) -0.004(3)
 C22 0.074(3) 0.060(3) 0.065(3) -0.019(2) -0.028(2) -0.003(2)
 C23 0.053(2) 0.045(2) 0.040(2) -0.0084(17) -0.0010(17) -0.0103(19)
 C24 0.064(3) 0.071(3) 0.055(2) -0.015(2) -0.007(2) 0.004(2)
 C25 0.090(4) 0.093(4) 0.071(3) -0.020(3) 0.003(3) 0.031(3)
 C26 0.147(6) 0.060(3) 0.066(3) -0.027(3) 0.018(4) 0.005(4)
 C27 0.136(5) 0.073(4) 0.096(4) -0.047(3) 0.012(4) -0.041(4)
 C28 0.078(3) 0.075(3) 0.087(3) -0.041(3) 0.002(2) -0.026(3)
 C29 0.0322(17) 0.040(2) 0.046(2) -0.0034(16) -0.0108(15) -0.0092(15)
 C30 0.070(3) 0.050(3) 0.054(2) -0.010(2) 0.016(2) -0.018(2)
 C31 0.075(3) 0.040(2) 0.069(3) -0.008(2) -0.007(2) -0.014(2)
 C32 0.067(3) 0.053(3) 0.055(2) 0.005(2) -0.014(2) -0.019(2)
 C33 0.095(3) 0.061(3) 0.048(2) -0.002(2) 0.010(2) -0.010(3)
 C34 0.095(3) 0.049(2) 0.045(2) -0.0072(19) 0.001(2) -0.019(2)
 C35 0.045(5) 0.045(6) 0.035(5) -0.009(4) -0.009(4) -0.014(4)
 C36 0.0342(18) 0.047(2) 0.051(2) -0.0072(17) -0.0105(16) -0.0095(16)
 C37 0.047(2) 0.075(3) 0.087(3) -0.041(3) -0.028(2) 0.003(2)
 C38 0.070(3) 0.083(4) 0.138(5) -0.033(4) 0.001(3) -0.028(3)
 C39 0.134(6) 0.101(5) 0.084(4) 0.006(3) -0.010(4) -0.004(4)
 C40 0.097(4) 0.133(5) 0.078(4) -0.045(4) -0.043(3) 0.014(4)
 C41 0.054(3) 0.110(4) 0.121(4) -0.063(3) -0.022(3) -0.020(3)
 C42 0.062(3) 0.072(3) 0.063(3) -0.027(2) -0.009(2) -0.004(2)
 C43 0.038(4) 0.048(5) 0.048(5) -0.007(4) -0.014(3) -0.019(3)
 Cl3 0.234(2) 0.216(2) 0.1652(17) 0.0262(16) -0.0951(17) -0.125(2)
 Cl4 0.2002(18) 0.1622(17) 0.1022(11) -0.0351(11) -0.0059(11) -0.0867(15)
 C44 0.302(10) 0.078(4) 0.201(7) -0.039(5) -0.160(7) -0.010(5)

_geom_special_details
;
 All esds (except the esd in the dihedral angle between two l.s. planes)
 are estimated using the full covariance matrix.  The cell esds are taken
 into account individually in the estimation of esds in distances, angles
 and torsion angles; correlations between esds in cell parameters are only
 used when they are defined by crystal symmetry.  An approximate (isotropic)
 treatment of cell esds is used for estimating esds involving l.s. planes.
;
loop_
  _geom_bond_atom_site_label_1
  _geom_bond_atom_site_label_2
  _geom_bond_distance
  _geom_bond_site_symmetry_2
  _geom_bond_publ_flag
 Ni1 Cl1 2.1435(10) . ?
 Ni1 Cl2 2.1856(10) . ?
 Ni1 P1 2.2322(10) . ?
 Ni1 P2 2.2293(10) . ?
 P1 C23 1.818(3) . ?
 P1 C29 1.819(3) . ?
 P1 C36 1.842(3) . ?
 P2 C2 1.843(3) . ?
 P2 C11 1.827(4) . ?
 P2 C17 1.814(3) . ?
 Si1 O1 1.616(2) . ?
 Si1 O2 1.639(2) . ?
 Si1 C9 1.829(3) . ?
 Si1 C10 1.841(3) . ?
 O1 C35 1.345(8) . ?
 O1 C43 1.338(6) . ?
 O2 C1 1.385(4) . ?
 C1 H1 0.9800 . ?
 C1 C2 1.533(4) . ?
 C1 C3 1.516(4) . ?
 C2 H2A 0.9700 . ?
 C2 H2B 0.9700 . ?
 C3 C4 1.380(5) . ?
 C3 C8 1.369(5) . ?
 C4 H4 0.9300 . ?
 C4 C5 1.393(5) . ?
 C5 H5 0.9300 . ?
 C5 C6 1.379(6) . ?
 C6 H6 0.9300 . ?
 C6 C7 1.321(6) . ?
 C7 H7 0.9300 . ?
 C7 C8 1.371(5) . ?
 C8 H8 0.9300 . ?
 C9 H9A 0.9600 . ?
 C9 H9B 0.9600 . ?
 C9 H9C 0.9600 . ?
 C10 H10A 0.9600 . ?
 C10 H10B 0.9600 . ?
 C10 H10C 0.9600 . ?
 C11 C12 1.387(5) . ?
 C11 C16 1.387(5) . ?
 C12 H12 0.9300 . ?
 C12 C13 1.391(5) . ?
 C13 H13 0.9300 . ?
 C13 C14 1.356(6) . ?
 C14 H14 0.9300 . ?
 C14 C15 1.351(6) . ?
 C15 H15 0.9300 . ?
 C15 C16 1.381(5) . ?
 C16 H16 0.9300 . ?
 C17 C18 1.369(5) . ?
 C17 C22 1.380(4) . ?
 C18 H18 0.9300 . ?
 C18 C19 1.386(5) . ?
 C19 H19 0.9300 . ?
 C19 C20 1.348(5) . ?
 C20 H20 0.9300 . ?
 C20 C21 1.353(6) . ?
 C21 H21 0.9300 . ?
 C21 C22 1.379(5) . ?
 C22 H22 0.9300 . ?
 C23 C24 1.383(5) . ?
 C23 C28 1.376(5) . ?
 C24 H24 0.9300 . ?
 C24 C25 1.379(6) . ?
 C25 H25 0.9300 . ?
 C25 C26 1.355(7) . ?
 C26 H26 0.9300 . ?
 C26 C27 1.361(7) . ?
 C27 H27 0.9300 . ?
 C27 C28 1.401(6) . ?
 C28 H28 0.9300 . ?
 C29 C30 1.372(5) . ?
 C29 C34 1.378(4) . ?
 C30 H30 0.9300 . ?
 C30 C31 1.380(4) . ?
 C31 H31 0.9300 . ?
 C31 C32 1.365(5) . ?
 C32 H32 0.9300 . ?
 C32 C33 1.357(5) . ?
 C33 H33 0.9300 . ?
 C33 C34 1.373(5) . ?
 C34 H34 0.9300 . ?
 C35 H35 0.9800 . ?
 C35 C36 1.578(8) . ?
 C35 C37 1.529(7) . ?
 C36 H36A 0.9700 . ?
 C36 H36B 0.9700 . ?
 C36 H36C 0.9700 . ?
 C36 H36D 0.9700 . ?
 C36 C43 1.495(7) . ?
 C37 C38 1.3900 . ?
 C37 C42 1.3900 . ?
 C37 C43 1.612(7) . ?
 C38 H38 0.9300 . ?
 C38 C39 1.3900 . ?
 C39 H39 0.9300 . ?
 C39 C40 1.3900 . ?
 C40 H40 0.9300 . ?
 C40 C41 1.3900 . ?
 C41 H41 0.9300 . ?
 C41 C42 1.3900 . ?
 C42 H42 0.9300 . ?
 C43 H43 0.9800 . ?
 Cl3 C44 1.689(5) . ?
 Cl4 C44 1.686(5) . ?
 C44 H44A 0.9700 . ?
 C44 H44B 0.9700 . ?

loop_
  _geom_angle_atom_site_label_1
  _geom_angle_atom_site_label_2
  _geom_angle_atom_site_label_3
  _geom_angle
  _geom_angle_site_symmetry_1
  _geom_angle_site_symmetry_3
  _geom_angle_publ_flag
 Cl1 Ni1 Cl2 164.83(4) . . ?
 Cl1 Ni1 P1 91.41(4) . . ?
 Cl1 Ni1 P2 91.93(4) . . ?
 Cl2 Ni1 P1 89.63(4) . . ?
 Cl2 Ni1 P2 89.00(4) . . ?
 P2 Ni1 P1 172.17(4) . . ?
 C23 P1 Ni1 111.66(12) . . ?
 C23 P1 C29 103.12(15) . . ?
 C23 P1 C36 105.18(16) . . ?
 C29 P1 Ni1 119.70(10) . . ?
 C29 P1 C36 102.97(15) . . ?
 C36 P1 Ni1 112.78(10) . . ?
 C2 P2 Ni1 113.91(10) . . ?
 C11 P2 Ni1 113.06(12) . . ?
 C11 P2 C2 103.00(15) . . ?
 C17 P2 Ni1 117.56(11) . . ?
 C17 P2 C2 105.36(16) . . ?
 C17 P2 C11 102.32(16) . . ?
 O1 Si1 O2 105.92(14) . . ?
 O1 Si1 C9 109.50(16) . . ?
 O1 Si1 C10 112.02(15) . . ?
 O2 Si1 C9 104.82(15) . . ?
 O2 Si1 C10 112.09(14) . . ?
 C9 Si1 C10 112.08(18) . . ?
 C35 O1 Si1 136.5(4) . . ?
 C43 O1 Si1 145.6(3) . . ?
 C1 O2 Si1 127.1(2) . . ?
 O2 C1 H1 107.2 . . ?
 O2 C1 C2 110.8(3) . . ?
 O2 C1 C3 112.7(3) . . ?
 C2 C1 H1 107.2 . . ?
 C3 C1 H1 107.2 . . ?
 C3 C1 C2 111.3(3) . . ?
 P2 C2 H2A 108.3 . . ?
 P2 C2 H2B 108.3 . . ?
 C1 C2 P2 116.0(2) . . ?
 C1 C2 H2A 108.3 . . ?
 C1 C2 H2B 108.3 . . ?
 H2A C2 H2B 107.4 . . ?
 C4 C3 C1 121.4(4) . . ?
 C8 C3 C1 119.2(4) . . ?
 C8 C3 C4 119.3(3) . . ?
 C3 C4 H4 120.4 . . ?
 C3 C4 C5 119.2(4) . . ?
 C5 C4 H4 120.4 . . ?
 C4 C5 H5 120.4 . . ?
 C6 C5 C4 119.2(4) . . ?
 C6 C5 H5 120.4 . . ?
 C5 C6 H6 119.4 . . ?
 C7 C6 C5 121.2(4) . . ?
 C7 C6 H6 119.4 . . ?
 C6 C7 H7 119.8 . . ?
 C6 C7 C8 120.4(4) . . ?
 C8 C7 H7 119.8 . . ?
 C3 C8 C7 120.7(4) . . ?
 C3 C8 H8 119.7 . . ?
 C7 C8 H8 119.7 . . ?
 Si1 C9 H9A 109.5 . . ?
 Si1 C9 H9B 109.5 . . ?
 Si1 C9 H9C 109.5 . . ?
 H9A C9 H9B 109.5 . . ?
 H9A C9 H9C 109.5 . . ?
 H9B C9 H9C 109.5 . . ?
 Si1 C10 H10A 109.5 . . ?
 Si1 C10 H10B 109.5 . . ?
 Si1 C10 H10C 109.5 . . ?
 H10A C10 H10B 109.5 . . ?
 H10A C10 H10C 109.5 . . ?
 H10B C10 H10C 109.5 . . ?
 C12 C11 P2 121.5(3) . . ?
 C12 C11 C16 119.0(3) . . ?
 C16 C11 P2 119.4(3) . . ?
 C11 C12 H12 120.2 . . ?
 C11 C12 C13 119.7(4) . . ?
 C13 C12 H12 120.2 . . ?
 C12 C13 H13 120.3 . . ?
 C14 C13 C12 119.4(4) . . ?
 C14 C13 H13 120.3 . . ?
 C13 C14 H14 118.9 . . ?
 C15 C14 C13 122.1(4) . . ?
 C15 C14 H14 118.9 . . ?
 C14 C15 H15 120.3 . . ?
 C14 C15 C16 119.3(5) . . ?
 C16 C15 H15 120.3 . . ?
 C11 C16 H16 119.8 . . ?
 C15 C16 C11 120.4(4) . . ?
 C15 C16 H16 119.8 . . ?
 C18 C17 P2 121.9(3) . . ?
 C18 C17 C22 116.9(3) . . ?
 C22 C17 P2 121.1(3) . . ?
 C17 C18 H18 119.6 . . ?
 C17 C18 C19 120.8(4) . . ?
 C19 C18 H18 119.6 . . ?
 C18 C19 H19 119.4 . . ?
 C20 C19 C18 121.2(4) . . ?
 C20 C19 H19 119.4 . . ?
 C19 C20 H20 120.4 . . ?
 C19 C20 C21 119.1(4) . . ?
 C21 C20 H20 120.4 . . ?
 C20 C21 H21 119.9 . . ?
 C20 C21 C22 120.2(4) . . ?
 C22 C21 H21 119.9 . . ?
 C17 C22 H22 119.1 . . ?
 C21 C22 C17 121.7(4) . . ?
 C21 C22 H22 119.1 . . ?
 C24 C23 P1 122.6(3) . . ?
 C28 C23 P1 118.5(3) . . ?
 C28 C23 C24 118.8(4) . . ?
 C23 C24 H24 119.9 . . ?
 C25 C24 C23 120.2(4) . . ?
 C25 C24 H24 119.9 . . ?
 C24 C25 H25 119.8 . . ?
 C26 C25 C24 120.5(5) . . ?
 C26 C25 H25 119.8 . . ?
 C25 C26 H26 119.6 . . ?
 C25 C26 C27 120.8(5) . . ?
 C27 C26 H26 119.6 . . ?
 C26 C27 H27 120.4 . . ?
 C26 C27 C28 119.2(5) . . ?
 C28 C27 H27 120.4 . . ?
 C23 C28 C27 120.5(4) . . ?
 C23 C28 H28 119.8 . . ?
 C27 C28 H28 119.8 . . ?
 C30 C29 P1 120.3(3) . . ?
 C30 C29 C34 117.1(3) . . ?
 C34 C29 P1 122.5(3) . . ?
 C29 C30 H30 118.9 . . ?
 C29 C30 C31 122.3(3) . . ?
 C31 C30 H30 118.9 . . ?
 C30 C31 H31 120.3 . . ?
 C32 C31 C30 119.4(4) . . ?
 C32 C31 H31 120.3 . . ?
 C31 C32 H32 120.5 . . ?
 C33 C32 C31 119.0(4) . . ?
 C33 C32 H32 120.5 . . ?
 C32 C33 H33 119.2 . . ?
 C32 C33 C34 121.6(4) . . ?
 C34 C33 H33 119.2 . . ?
 C29 C34 C33 120.5(4) . . ?
 C29 C34 H34 119.8 . . ?
 C33 C34 H34 119.8 . . ?
 O1 C35 H35 109.8 . . ?
 O1 C35 C36 108.5(6) . . ?
 O1 C35 C37 113.0(6) . . ?
 C36 C35 H35 109.8 . . ?
 C37 C35 H35 109.8 . . ?
 C37 C35 C36 105.7(5) . . ?
 P1 C36 H36A 108.9 . . ?
 P1 C36 H36B 108.9 . . ?
 P1 C36 H36C 108.3 . . ?
 P1 C36 H36D 108.3 . . ?
 C35 C36 P1 116.0(3) . . ?
 C35 C36 H36C 108.3 . . ?
 C35 C36 H36D 108.3 . . ?
 H36A C36 H36B 107.7 . . ?
 H36C C36 H36D 107.4 . . ?
 C43 C36 P1 113.4(3) . . ?
 C43 C36 H36A 108.9 . . ?
 C43 C36 H36B 108.9 . . ?
 C38 C37 C35 99.5(5) . . ?
 C38 C37 C42 120.0 . . ?
 C38 C37 C43 136.1(4) . . ?
 C42 C37 C35 140.3(5) . . ?
 C42 C37 C43 103.9(4) . . ?
 C37 C38 H38 120.0 . . ?
 C39 C38 C37 120.0 . . ?
 C39 C38 H38 120.0 . . ?
 C38 C39 H39 120.0 . . ?
 C38 C39 C40 120.0 . . ?
 C40 C39 H39 120.0 . . ?
 C39 C40 H40 120.0 . . ?
 C41 C40 C39 120.0 . . ?
 C41 C40 H40 120.0 . . ?
 C40 C41 H41 120.0 . . ?
 C42 C41 C40 120.0 . . ?
 C42 C41 H41 120.0 . . ?
 C37 C42 H42 120.0 . . ?
 C41 C42 C37 120.0 . . ?
 C41 C42 H42 120.0 . . ?
 O1 C43 C36 114.0(5) . . ?
 O1 C43 C37 108.5(5) . . ?
 O1 C43 H43 109.5 . . ?
 C36 C43 C37 105.7(4) . . ?
 C36 C43 H43 109.5 . . ?
 C37 C43 H43 109.5 . . ?
 Cl3 C44 H44A 108.5 . . ?
 Cl3 C44 H44B 108.5 . . ?
 Cl4 C44 Cl3 115.0(3) . . ?
 Cl4 C44 H44A 108.5 . . ?
 Cl4 C44 H44B 108.5 . . ?
 H44A C44 H44B 107.5 . . ?

loop_
  _geom_torsion_atom_site_label_1
  _geom_torsion_atom_site_label_2
  _geom_torsion_atom_site_label_3
  _geom_torsion_atom_site_label_4
  _geom_torsion
  _geom_torsion_site_symmetry_1
  _geom_torsion_site_symmetry_2
  _geom_torsion_site_symmetry_3
  _geom_torsion_site_symmetry_4
  _geom_torsion_publ_flag
 Ni1 P1 C23 C24 -150.1(3) . . . . ?
 Ni1 P1 C23 C28 32.4(3) . . . . ?
 Ni1 P1 C29 C30 60.3(3) . . . . ?
 Ni1 P1 C29 C34 -120.5(3) . . . . ?
 Ni1 P1 C36 C35 -23.5(5) . . . . ?
 Ni1 P1 C36 C43 -65.0(4) . . . . ?
 Ni1 P2 C2 C1 25.6(3) . . . . ?
 Ni1 P2 C11 C12 163.9(2) . . . . ?
 Ni1 P2 C11 C16 -19.3(3) . . . . ?
 Ni1 P2 C17 C18 -78.2(3) . . . . ?
 Ni1 P2 C17 C22 97.8(3) . . . . ?
 P1 C23 C24 C25 -177.7(3) . . . . ?
 P1 C23 C28 C27 176.9(3) . . . . ?
 P1 C29 C30 C31 176.3(3) . . . . ?
 P1 C29 C34 C33 -177.7(3) . . . . ?
 P1 C36 C43 O1 44.4(7) . . . . ?
 P1 C36 C43 C37 163.5(3) . . . . ?
 P2 C11 C12 C13 178.6(3) . . . . ?
 P2 C11 C16 C15 -178.1(3) . . . . ?
 P2 C17 C18 C19 175.8(3) . . . . ?
 P2 C17 C22 C21 -176.0(3) . . . . ?
 Si1 O1 C35 C36 177.0(3) . . . . ?
 Si1 O1 C35 C37 -66.1(10) . . . . ?
 Si1 O1 C43 C36 171.5(3) . . . . ?
 Si1 O1 C43 C37 54.0(10) . . . . ?
 Si1 O2 C1 C2 -155.4(2) . . . . ?
 Si1 O2 C1 C3 79.1(4) . . . . ?
 O1 Si1 O2 C1 63.4(3) . . . . ?
 O1 C35 C36 P1 -40.6(8) . . . . ?
 O1 C35 C37 C38 127.8(6) . . . . ?
 O1 C35 C37 C42 -46.6(9) . . . . ?
 O2 Si1 O1 C35 -87.9(7) . . . . ?
 O2 Si1 O1 C43 -158.9(7) . . . . ?
 O2 C1 C2 P2 49.8(4) . . . . ?
 O2 C1 C3 C4 47.9(5) . . . . ?
 O2 C1 C3 C8 -132.3(3) . . . . ?
 C1 C3 C4 C5 -178.7(3) . . . . ?
 C1 C3 C8 C7 179.3(3) . . . . ?
 C2 P2 C11 C12 40.5(3) . . . . ?
 C2 P2 C11 C16 -142.7(3) . . . . ?
 C2 P2 C17 C18 50.0(4) . . . . ?
 C2 P2 C17 C22 -134.1(3) . . . . ?
 C2 C1 C3 C4 -77.3(4) . . . . ?
 C2 C1 C3 C8 102.5(4) . . . . ?
 C3 C1 C2 P2 176.1(3) . . . . ?
 C3 C4 C5 C6 -0.8(6) . . . . ?
 C4 C3 C8 C7 -0.9(5) . . . . ?
 C4 C5 C6 C7 -0.6(6) . . . . ?
 C5 C6 C7 C8 1.2(7) . . . . ?
 C6 C7 C8 C3 -0.4(6) . . . . ?
 C8 C3 C4 C5 1.5(5) . . . . ?
 C9 Si1 O1 C35 159.6(7) . . . . ?
 C9 Si1 O1 C43 88.5(7) . . . . ?
 C9 Si1 O2 C1 179.2(3) . . . . ?
 C10 Si1 O1 C35 34.6(7) . . . . ?
 C10 Si1 O1 C43 -36.4(8) . . . . ?
 C10 Si1 O2 C1 -59.0(3) . . . . ?
 C11 P2 C2 C1 148.4(3) . . . . ?
 C11 P2 C17 C18 157.3(3) . . . . ?
 C11 P2 C17 C22 -26.7(3) . . . . ?
 C11 C12 C13 C14 -1.8(6) . . . . ?
 C12 C11 C16 C15 -1.2(6) . . . . ?
 C12 C13 C14 C15 1.2(8) . . . . ?
 C13 C14 C15 C16 -0.6(8) . . . . ?
 C14 C15 C16 C11 0.6(7) . . . . ?
 C16 C11 C12 C13 1.8(5) . . . . ?
 C17 P2 C2 C1 -104.7(3) . . . . ?
 C17 P2 C11 C12 -68.7(3) . . . . ?
 C17 P2 C11 C16 108.1(3) . . . . ?
 C17 C18 C19 C20 1.0(8) . . . . ?
 C18 C17 C22 C21 0.2(6) . . . . ?
 C18 C19 C20 C21 -1.5(8) . . . . ?
 C19 C20 C21 C22 1.3(7) . . . . ?
 C20 C21 C22 C17 -0.7(7) . . . . ?
 C22 C17 C18 C19 -0.3(6) . . . . ?
 C23 P1 C29 C30 -175.0(3) . . . . ?
 C23 P1 C29 C34 4.2(3) . . . . ?
 C23 P1 C36 C35 -145.4(5) . . . . ?
 C23 P1 C36 C43 173.1(4) . . . . ?
 C23 C24 C25 C26 0.1(7) . . . . ?
 C24 C23 C28 C27 -0.7(6) . . . . ?
 C24 C25 C26 C27 0.8(8) . . . . ?
 C25 C26 C27 C28 -1.6(8) . . . . ?
 C26 C27 C28 C23 1.6(7) . . . . ?
 C28 C23 C24 C25 -0.1(6) . . . . ?
 C29 P1 C23 C24 80.1(3) . . . . ?
 C29 P1 C23 C28 -97.4(3) . . . . ?
 C29 P1 C36 C35 106.9(5) . . . . ?
 C29 P1 C36 C43 65.4(4) . . . . ?
 C29 C30 C31 C32 1.5(6) . . . . ?
 C30 C29 C34 C33 1.6(6) . . . . ?
 C30 C31 C32 C33 1.4(6) . . . . ?
 C31 C32 C33 C34 -2.8(7) . . . . ?
 C32 C33 C34 C29 1.3(7) . . . . ?
 C34 C29 C30 C31 -3.0(6) . . . . ?
 C35 C37 C38 C39 -175.9(3) . . . . ?
 C35 C37 C42 C41 173.7(5) . . . . ?
 C36 P1 C23 C24 -27.4(3) . . . . ?
 C36 P1 C23 C28 155.0(3) . . . . ?
 C36 P1 C29 C30 -65.8(3) . . . . ?
 C36 P1 C29 C34 113.5(3) . . . . ?
 C36 C35 C37 C38 -113.6(5) . . . . ?
 C36 C35 C37 C42 71.9(7) . . . . ?
 C37 C35 C36 P1 -162.1(4) . . . . ?
 C37 C38 C39 C40 0.0 . . . . ?
 C38 C37 C42 C41 0.0 . . . . ?
 C38 C37 C43 O1 64.6(6) . . . . ?
 C38 C37 C43 C36 -58.0(6) . . . . ?
 C38 C39 C40 C41 0.0 . . . . ?
 C39 C40 C41 C42 0.0 . . . . ?
 C40 C41 C42 C37 0.0 . . . . ?
 C42 C37 C38 C39 0.0 . . . . ?
 C42 C37 C43 O1 -116.4(5) . . . . ?
 C42 C37 C43 C36 121.0(4) . . . . ?
 C43 C37 C38 C39 178.9(4) . . . . ?
 C43 C37 C42 C41 -179.2(3) . . . . ?

_shelx_res_file
;
TITL mo221124a_a.res in P-1
    mo221124a.res
    created by SHELXL-2018/3 at 20:27:47 on 28-Nov-2022
REM Old TITL mo_221124a_0m in P-1
REM SHELXT solution in P-1
REM R1 0.181, Rweak 0.010, Alpha 0.067, Orientation as input
REM Formula found by SHELXT: C39 N8 P5 Ni
CELL 0.71073 11.3595 13.185 16.1226 76.717 75.085 69.919
ZERR 2 0.0027 0.0031 0.0038 0.005 0.005 0.005
LATT 1
SFAC C H Cl Ni O P Si
UNIT 86 88 8 2 4 4 2
SADI O1 C43 O1 C35
SADI C36 C43 C36 C35
SADI C37 C43 C37 C35

L.S. 20 0 0
PLAN  5
SIZE 0.12 0.12 0.08
TEMP 23
CONF
BOND $H
list 4
MORE -1
fmap 2 53
ACTA
REM <olex2.extras>
REM <HklSrc "%.\\mo221124a.hkl">
REM </olex2.extras>

WGHT    0.038700
FVAR       0.46334   0.55397
NI1   4    0.412334    0.665487    0.210893    11.00000    0.03707    0.03938 =
         0.03961   -0.00795   -0.00798   -0.01210
CL1   3    0.362353    0.767685    0.093170    11.00000    0.05363    0.07204 =
         0.05328    0.00906   -0.01827   -0.02437
CL2   3    0.468724    0.527020    0.312205    11.00000    0.05403    0.04646 =
         0.05364    0.00028   -0.01431   -0.01315
P1    6    0.616218    0.662560    0.164946    11.00000    0.03507    0.04020 =
         0.04312   -0.00901   -0.00583   -0.00945
P2    6    0.208230    0.680463    0.270927    11.00000    0.03857    0.04342 =
         0.04633   -0.00800   -0.00840   -0.01481
SI1   7    0.377987    0.889639    0.350332    11.00000    0.04087    0.04508 =
         0.04317   -0.01208   -0.00701   -0.01372
O1    5    0.505419    0.802952    0.306417    11.00000    0.04205    0.08479 =
         0.04854   -0.02294   -0.01405    0.00939
O2    5    0.261936    0.836226    0.365381    11.00000    0.06644    0.07953 =
         0.04030    0.00240   -0.01325   -0.04461
C1    1    0.250358    0.740055    0.418664    11.00000    0.07462    0.06558 =
         0.05066   -0.01863   -0.00096   -0.03291
AFIX  13
H1    2    0.336019    0.687047    0.413878    11.00000   -1.20000
AFIX   0
C2    1    0.166693    0.692646    0.387275    11.00000    0.04530    0.06177 =
         0.04594   -0.01488    0.00071   -0.02511
AFIX  23
H2A   2    0.078760    0.738330    0.400032    11.00000   -1.20000
H2B   2    0.171106    0.620625    0.420717    11.00000   -1.20000
AFIX   0
C3    1    0.201986    0.753442    0.513525    11.00000    0.05786    0.06376 =
         0.04122   -0.01552    0.00219   -0.03371
C4    1    0.097051    0.838981    0.539331    11.00000    0.06775    0.06780 =
         0.05054   -0.00507   -0.01037   -0.01770
AFIX  43
H4    2    0.052922    0.889421    0.498588    11.00000   -1.20000
AFIX   0
C5    1    0.057995    0.848892    0.627128    11.00000    0.06635    0.07602 =
         0.07534   -0.03255    0.01431   -0.02274
AFIX  43
H5    2   -0.011900    0.906519    0.645659    11.00000   -1.20000
AFIX   0
C6    1    0.124280    0.772171    0.686244    11.00000    0.11615    0.08611 =
         0.04484   -0.01517    0.00246   -0.05324
AFIX  43
H6    2    0.098947    0.778900    0.744864    11.00000   -1.20000
AFIX   0
C7    1    0.223134    0.689268    0.661116    11.00000    0.09114    0.07041 =
         0.07329   -0.00435   -0.02040   -0.04078
AFIX  43
H7    2    0.265496    0.637706    0.702195    11.00000   -1.20000
AFIX   0
C8    1    0.263619    0.678798    0.574895    11.00000    0.05970    0.05932 =
         0.07330   -0.01010   -0.00688   -0.02602
AFIX  43
H8    2    0.333661    0.620399    0.557916    11.00000   -1.20000
AFIX   0
C9    1    0.336007    1.014198    0.271775    11.00000    0.06429    0.05474 =
         0.07853   -0.00286   -0.00959   -0.01555
AFIX 137
H9A   2    0.316374    0.997365    0.223009    11.00000   -1.50000
H9B   2    0.406744    1.043533    0.252282    11.00000   -1.50000
H9C   2    0.262871    1.067067    0.298807    11.00000   -1.50000
AFIX   0
C10   1    0.395378    0.918143    0.452392    11.00000    0.06938    0.08278 =
         0.06706   -0.03459   -0.00786   -0.02651
AFIX 137
H10A  2    0.316815    0.967591    0.477544    11.00000   -1.50000
H10B  2    0.462957    0.950591    0.440626    11.00000   -1.50000
H10C  2    0.415429    0.851109    0.492218    11.00000   -1.50000
AFIX   0
C11   1    0.163830    0.560303    0.269409    11.00000    0.04790    0.05372 =
         0.04877   -0.00285   -0.01516   -0.02147
C12   1    0.052908    0.541793    0.321473    11.00000    0.05825    0.07111 =
         0.07960   -0.00298   -0.02219   -0.03329
AFIX  43
H12   2    0.000015    0.590179    0.359198    11.00000   -1.20000
AFIX   0
C13   1    0.021165    0.450487    0.316983    11.00000    0.08877    0.09245 =
         0.09450    0.01050   -0.03627   -0.06256
AFIX  43
H13   2   -0.051740    0.436310    0.352811    11.00000   -1.20000
AFIX   0
C14   1    0.097420    0.382360    0.259934    11.00000    0.11846    0.07364 =
         0.13415    0.00329   -0.06541   -0.05946
AFIX  43
H14   2    0.074691    0.322291    0.256501    11.00000   -1.20000
AFIX   0
C15   1    0.205350    0.398949    0.207923    11.00000    0.10576    0.08015 =
         0.12918   -0.04176   -0.03774   -0.03914
AFIX  43
H15   2    0.256370    0.350522    0.169766    11.00000   -1.20000
AFIX   0
C16   1    0.239182    0.488551    0.211976    11.00000    0.07160    0.06824 =
         0.08034   -0.02629   -0.01369   -0.03067
AFIX  43
H16   2    0.312941    0.500843    0.175972    11.00000   -1.20000
AFIX   0
C17   1    0.087347    0.790851    0.221760    11.00000    0.03570    0.05182 =
         0.04702   -0.00634   -0.00813   -0.01318
C18   1    0.056418    0.896256    0.235698    11.00000    0.07958    0.05134 =
         0.12199   -0.01946   -0.05716   -0.01146
AFIX  43
H18   2    0.094034    0.911679    0.274256    11.00000   -1.20000
AFIX   0
C19   1   -0.030299    0.980262    0.193023    11.00000    0.10806    0.05331 =
         0.16497   -0.02667   -0.08196    0.00506
AFIX  43
H19   2   -0.048985    1.051472    0.202753    11.00000   -1.20000
AFIX   0
C20   1   -0.088087    0.960719    0.137669    11.00000    0.07330    0.06782 =
         0.10476   -0.01496   -0.04745    0.00645
AFIX  43
H20   2   -0.147591    1.017553    0.110441    11.00000   -1.20000
AFIX   0
C21   1   -0.058387    0.857352    0.122247    11.00000    0.07495    0.09032 =
         0.07599   -0.02157   -0.04054   -0.00438
AFIX  43
H21   2   -0.096299    0.843108    0.083263    11.00000   -1.20000
AFIX   0
C22   1    0.027926    0.773059    0.164156    11.00000    0.07390    0.06000 =
         0.06511   -0.01937   -0.02775   -0.00288
AFIX  43
H22   2    0.046602    0.702338    0.153323    11.00000   -1.20000
AFIX   0
C23   1    0.714063    0.538450    0.120539    11.00000    0.05282    0.04525 =
         0.03951   -0.00841   -0.00097   -0.01029
C24   1    0.842259    0.492022    0.123975    11.00000    0.06448    0.07116 =
         0.05546   -0.01459   -0.00679    0.00362
AFIX  43
H24   2    0.880819    0.522978    0.151664    11.00000   -1.20000
AFIX   0
C25   1    0.913123    0.399985    0.086492    11.00000    0.08980    0.09283 =
         0.07131   -0.01987    0.00305    0.03149
AFIX  43
H25   2    0.999252    0.369130    0.089162    11.00000   -1.20000
AFIX   0
C26   1    0.858217    0.354172    0.045806    11.00000    0.14659    0.05980 =
         0.06633   -0.02657    0.01775    0.00527
AFIX  43
H26   2    0.906898    0.291608    0.021408    11.00000   -1.20000
AFIX   0
C27   1    0.732729    0.398556    0.040193    11.00000    0.13571    0.07331 =
         0.09639   -0.04707    0.01217   -0.04101
AFIX  43
H27   2    0.696143    0.367750    0.010945    11.00000   -1.20000
AFIX   0
C28   1    0.659297    0.491249    0.079023    11.00000    0.07767    0.07527 =
         0.08668   -0.04077    0.00222   -0.02562
AFIX  43
H28   2    0.572968    0.521067    0.076719    11.00000   -1.20000
AFIX   0
C29   1    0.656709    0.770165    0.080696    11.00000    0.03221    0.03952 =
         0.04621   -0.00335   -0.01084   -0.00917
C30   1    0.608052    0.877164    0.093810    11.00000    0.06973    0.05045 =
         0.05437   -0.01017    0.01594   -0.01801
AFIX  43
H30   2    0.550320    0.894039    0.144939    11.00000   -1.20000
AFIX   0
C31   1    0.641807    0.960631    0.033758    11.00000    0.07506    0.03951 =
         0.06880   -0.00796   -0.00703   -0.01432
AFIX  43
H31   2    0.608772    1.032173    0.045101    11.00000   -1.20000
AFIX   0
C32   1    0.724142    0.937232   -0.042458    11.00000    0.06703    0.05255 =
         0.05501    0.00550   -0.01401   -0.01882
AFIX  43
H32   2    0.749342    0.992259   -0.083070    11.00000   -1.20000
AFIX   0
C33   1    0.768628    0.832493   -0.058042    11.00000    0.09473    0.06133 =
         0.04756   -0.00186    0.00992   -0.00970
AFIX  43
H33   2    0.821719    0.816817   -0.110960    11.00000   -1.20000
AFIX   0
C34   1    0.737181    0.749053    0.002412    11.00000    0.09481    0.04857 =
         0.04457   -0.00715    0.00064   -0.01943
AFIX  43
H34   2    0.770429    0.677791   -0.009566    11.00000   -1.20000
AFIX   0
PART 2
C35   1    0.596693    0.714460    0.334505   -21.00000    0.04454    0.04542 =
         0.03535   -0.00852   -0.00931   -0.01370
AFIX  13
H35   2    0.557603    0.660028    0.372134   -21.00000   -1.20000
AFIX   0
PART 0
C36   1    0.690927    0.664852    0.253006    11.00000    0.03416    0.04736 =
         0.05061   -0.00717   -0.01049   -0.00952
PART 1
AFIX  23
H36A  2    0.683034    0.603779    0.298624    21.00000   -1.20000
H36B  2    0.781305    0.655085    0.230568    21.00000   -1.20000
AFIX  23
PART 2
H36C  2    0.739443    0.590516    0.272641   -21.00000   -1.20000
H36D  2    0.751075    0.706469    0.229200   -21.00000   -1.20000
AFIX  66
PART 0
C37   1    0.679258    0.741517    0.382568    11.00000    0.04675    0.07454 =
         0.08709   -0.04144   -0.02812    0.00264
C38   1    0.669038    0.666755    0.458413    11.00000    0.07005    0.08254 =
         0.13825   -0.03303    0.00120   -0.02773
AFIX  43
H38   2    0.625079    0.616888    0.463993    11.00000   -1.20000
AFIX  65
C39   1    0.724522    0.666523    0.525920    11.00000    0.13417    0.10085 =
         0.08369    0.00592   -0.00958   -0.00407
AFIX  43
H39   2    0.717684    0.616502    0.576666    11.00000   -1.20000
AFIX  65
C40   1    0.790225    0.741054    0.517582    11.00000    0.09658    0.13345 =
         0.07819   -0.04542   -0.04317    0.01443
AFIX  43
H40   2    0.827347    0.740898    0.562749    11.00000   -1.20000
AFIX  65
C41   1    0.800446    0.815817    0.441736    11.00000    0.05402    0.10953 =
         0.12105   -0.06305   -0.02152   -0.01977
AFIX  43
H41   2    0.844406    0.865683    0.436158    11.00000   -1.20000
AFIX  65
C42   1    0.744963    0.816050    0.374229    11.00000    0.06247    0.07235 =
         0.06257   -0.02669   -0.00931   -0.00396
AFIX  43
H42   2    0.751801    0.866071    0.323483    11.00000   -1.20000
AFIX   0
PART 1
C43   1    0.633212    0.768350    0.291210    21.00000    0.03841    0.04777 =
         0.04790   -0.00690   -0.01386   -0.01905
AFIX  13
H43   2    0.666311    0.825869    0.252778    21.00000   -1.20000
AFIX   0

PART 0
CL3   3    0.593743    0.128692    0.310666    11.00000    0.23400    0.21627 =
         0.16520    0.02625   -0.09510   -0.12511
CL4   3    0.535763    0.226715    0.143439    11.00000    0.20024    0.16216 =
         0.10224   -0.03509   -0.00586   -0.08668
C44   1    0.543785    0.245041    0.241740    11.00000    0.30169    0.07837 =
         0.20115   -0.03851   -0.16029   -0.00976
AFIX  23
H44A  2    0.459761    0.287125    0.268650    11.00000   -1.20000
H44B  2    0.601341    0.288002    0.233482    11.00000   -1.20000
AFIX   0
HKLF 4


REM  mo221124a_a.res in P-1
REM wR2 = 0.1216, GooF = S = 0.838, Restrained GooF = 0.839 for all data
REM R1 = 0.0527 for 4896 Fo > 4sig(Fo) and 0.1394 for all 11764 data
REM 478 parameters refined using 3 restraints

END

WGHT      0.0424      0.0000

REM Highest difference peak  0.636,  deepest hole -0.531,  1-sigma level  0.064
Q1    1   0.4794  0.2145  0.3268  11.00000  0.05    0.64
Q2    1   0.1698  0.7997  0.4063  11.00000  0.05    0.50
Q3    1   0.7613  0.6841  0.5197  11.00000  0.05    0.38
Q4    1   0.6591  0.1243  0.2241  11.00000  0.05    0.34
Q5    1   0.7979  0.7629  0.4828  11.00000  0.05    0.31
;
_shelx_res_checksum                37975
_shelx_hkl_file
;
   0   0  -1   12.72    1.88
   0   0  -1   16.39    2.01
   0   0   1    0.94    0.90
   0   0   1   -0.21    0.94
   0   0  -2 3570.21   20.07
   0   0  -2 3495.24   28.52
   0   0  -2 3722.28   30.01
   0   0   2 3675.79   20.49
   0   0   2 3564.06   29.20
   0   0  -3   48.88    3.54
   0   0  -3   50.29    5.64
   0   0  -3   46.53    5.85
   0   0   3   50.89    3.67
   0   0  -4   14.94    2.90
   0   0  -4   13.36    4.40
   0   0  -4   12.34    4.78
   0   0   4   16.74    3.24
   0   0  -5  723.46   16.14
   0   0  -5  813.28   22.29
   0   0  -5  758.60   22.29
   0   0   5  681.79   14.17
   0   0  -6   28.82    6.57
   0   0  -6   28.01    6.79
   0   0   6   28.56    4.44
   0   0  -7  158.39   13.02
   0   0  -7  169.10   13.58
   0   0   7  171.32    8.79
   0   0  -8   83.76   12.55
   0   0  -8   82.91   12.21
   0   0   8   88.20    7.17
   0   0  -9  105.28   12.76
   0   0  -9  114.71   13.49
   0   0   9  105.36    8.11
   0   0 -10   41.11   10.37
   0   0 -10   22.16    7.98
   0   0  10   40.51    6.32
   0   0 -11    2.26    6.49
   0   0 -11   -1.07    4.78
   0   0  11    2.18    3.33
   0   0 -12   19.42    9.95
   0   0 -12   13.87    8.41
   0   0 -13   11.40    8.88
   0   0 -13   15.92    9.22
   0   0 -14   32.74   11.57
   0   0 -14   31.81   11.95
   0   0 -15   -1.32    7.73
   0   0 -15   -3.88    7.51
   0   0 -16   52.60   15.71
   0   0 -16   49.65   15.58
   0   0 -17   41.45   15.37
   0   0 -17   44.23   15.71
   0   0 -18    2.69    9.43
   0   0 -18   -0.43    9.90
   0   0 -19   49.78   17.97
   0   0 -19   72.24   20.45
   0   0 -20   -5.21   10.16
   0   0 -20   -2.99   10.59
   0   0 -21   25.10   15.88
   0   1 -21    8.62   11.95
   0   1 -20   -2.01   10.67
   0   1 -20   -5.98   10.97
   0   1 -19   -2.95    9.52
   0   1 -19   19.34   12.55
   0   1 -18   -1.32    8.84
   0   1 -18   -1.28    9.31
   0   1 -17   99.26   21.69
   0   1 -17   82.61   19.21
   0   1 -16   20.58   12.17
   0   1 -16    4.31    9.56
   0   1 -15  130.04   22.75
   0   1 -15  125.43   21.77
   0   1 -14   23.27   13.19
   0   1 -14    8.11    8.32
   0   1 -13    3.88    8.58
   0   1 -13   -2.73    6.15
   0   1 -12  121.97   18.96
   0   1 -12  126.16   18.78
   0   1 -11    8.58    7.81
   0   1 -11    4.27    6.92
   0  -1  10   40.26    4.91
   0   1 -10   33.21   10.12
   0   1 -10   36.25    9.90
   0  -1   9  103.78    6.62
   0   1  -9  120.86   16.52
   0   1  -9  108.57   15.07
   0  -1   8  504.36   12.55
   0   1  -8  470.47   23.78
   0   1  -8  494.33   23.48
   0  -1   7  319.34    9.48
   0   1  -7  308.41   10.20
   0   1  -7  340.60   19.64
   0   1  -7  318.35   17.67
   0  -1   6  223.62    7.39
   0   1  -6  211.97    7.13
   0   1  -6  227.63   14.90
   0   1  -6  225.37   14.43
   0  -1   5   22.11    2.90
   0   1  -5   25.27    3.03
   0   1  -5   27.07    6.40
   0   1  -5   27.15    6.57
   0  -1   4    5.04    1.88
   0   1  -4    7.73    1.84
   0   1  -4    5.34    4.01
   0   1  -4    4.35    3.93
   0  -1   3  119.20    3.93
   0   1  -3  117.15    3.93
   0   1  -3  134.39    4.01
   0   1  -3  138.75    9.26
   0   1  -3  119.41    8.28
   0  -1   2  592.57    7.43
   0   1  -2  641.24    7.68
   0   1  -2  639.40    7.64
   0   1  -2  652.76   15.28
   0   1  -2  676.24   14.47
   0  -1   1 5312.13   36.20
   0  -1   1 4937.08   31.76
   0   1  -1 5265.73   46.15
   0   1  -1 5415.28   35.56
   0   1  -1 4342.55   29.63
   0  -1   0  568.27    9.26
   0  -1   0  534.89    9.43
   0   1   0  557.17    9.22
   0   1   0  582.23    9.01
   0   1   0  467.69    8.75
   0  -1  -1 2536.21   16.01
   0  -1  -1 2867.50   24.04
   0   1   1 2660.53   22.97
   0   1   1 2258.80   15.07
   0   1   1    0.09    0.34
   0  -1  -2 1050.40   16.31
   0  -1  -2 1022.82   13.28
   0  -1  -2 1085.06   17.93
   0   1   2 1084.72   16.65
   0   1   2 1278.54   14.77
   0  -1  -3   51.44    4.82
   0  -1  -3   56.10    6.02
   0   1   3   52.64    4.91
   0   1   3   61.95    5.29
   0  -1  -4 1041.73   20.36
   0  -1  -4  965.31   22.71
   0   1   4 1003.26   19.38
   0  -1  -5   12.30    4.40
   0  -1  -5    5.21    4.40
   0   1   5   10.42    3.80
   0  -1  -6  399.21   16.39
   0  -1  -6  408.05   18.36
   0   1   6  458.73   15.24
   0  -1  -7  700.96   23.40
   0  -1  -7  665.91   25.19
   0   1   7  687.13   19.55
   0  -1  -8    2.05    4.44
   0  -1  -8   -2.01    4.35
   0   1   8   -3.20    3.12
   0  -1  -9  263.11   17.29
   0  -1  -9  267.34   19.04
   0   1   9  297.27   14.56
   0  -1 -10  415.86   22.75
   0  -1 -10  423.42   24.72
   0   1  10  428.37   17.80
   0  -1 -11  149.76   15.88
   0  -1 -11  133.46   15.58
   0   1  11  148.82   11.61
   0  -1 -12  133.97   15.97
   0  -1 -12  130.72   19.17
   0   1  12  144.38   11.74
   0  -1 -13   19.81    9.52
   0  -1 -13   33.51   12.00
   0  -1 -14   32.36   11.36
   0  -1 -14   32.06   12.68
   0  -1 -15   14.60   10.63
   0  -1 -15   44.78   14.43
   0  -1 -16    0.30    8.20
   0  -1 -16    3.93    9.48
   0  -1 -17    7.98   10.50
   0  -1 -17    5.68   10.03
   0  -1 -18   17.55   11.91
   0  -1 -18   39.62   15.67
   0  -1 -19   28.95   14.77
   0  -1 -19    9.82   12.21
   0  -1 -20   18.87   13.19
   0  -1 -21    2.26   12.17
   0   2 -21   -3.24   11.40
   0  -2  20    4.57   12.25
   0   2 -20   13.41   13.11
   0  -2  19   -5.51   10.50
   0   2 -19   -1.54   10.08
   0   2 -19    2.65   12.55
   0   2 -18   63.10   18.96
   0   2 -18   41.88   16.69
   0   2 -17    2.52    9.61
   0   2 -17    9.86   11.27
   0   2 -16  109.25   21.77
   0   2 -16  157.49   25.19
   0   2 -15   -3.93    7.73
   0   2 -15   -2.90    7.90
   0   2 -14   56.14   15.71
   0   2 -14   69.80   16.14
   0   2 -13   53.62   15.20
   0   2 -13   39.70   11.48
   0   2 -12  155.48   18.78
   0   2 -12  154.63   18.40
   0   2 -11   11.87    7.73
   0   2 -11    9.61    7.00
   0   2 -10   32.66   10.84
   0   2 -10   14.69    7.81
   0   2  -9   32.45    9.86
   0   2  -9   42.35   10.20
   0   2  -8   12.72    2.39
   0   2  -8    8.37    2.31
   0   2  -8   11.44    7.56
   0   2  -8   11.31    6.15
   0   2  -7  249.71    6.62
   0   2  -7  236.22    6.53
   0   2  -7  245.31   17.55
   0   2  -7  238.69   16.31
   0   2  -6   29.50    3.16
   0   2  -6   37.74    3.12
   0   2  -6   46.24    9.26
   0   2  -6   24.89    6.87
   0   2  -5   85.43    4.27
   0   2  -5   94.43    4.35
   0   2  -5  100.24   10.93
   0   2  -5   86.71    9.18
   0  -2   4  119.71   10.08
   0   2  -4  141.27    5.38
   0   2  -4  151.90    5.55
   0   2  -4  123.89   10.54
   0   2  -4  129.14   10.33
   0  -2   3  538.05   10.37
   0  -2   3  460.86   16.01
   0   2  -3  393.96    9.01
   0   2  -3  445.41   16.78
   0   2  -3  437.08   15.58
   0  -2   2   19.98    3.37
   0  -2   2   26.60    5.21
   0   2  -2   26.30    3.67
   0   2  -2   26.08    5.29
   0  -2   1 1344.20   18.61
   0  -2   1 1190.90   20.79
   0   2  -1 1447.30   19.42
   0   2  -1 1343.61   22.41
   0  -2   0 4566.94   35.26
   0  -2   0 4426.53   38.12
   0   2   0 4400.40   36.42
   0   2   0 4512.17   35.26
   0  -2  -1    8.75    2.39
   0  -2  -1    6.87    3.07
   0   2   1    7.56    3.03
   0  -2  -2  157.41    6.32
   0  -2  -2  148.14    8.67
   0   2   2  146.35    8.32
   0  -2  -3 3990.56   31.89
   0  -2  -3 4599.39   47.77
   0   2   3 4461.24   45.04
   0   2   3 4355.66   33.17
   0  -2  -4  477.00   13.23
   0  -2  -4  461.97   17.20
   0   2   4  460.99   15.88
   0  -2  -5  225.84   10.84
   0  -2  -5  238.26   13.83
   0   2   5  239.84   12.34
   0  -2  -6   64.38    7.51
   0  -2  -6   60.28    9.14
   0   2   6   69.46    7.77
   0  -2  -7    0.60    3.59
   0  -2  -7    0.98    3.93
   0   2   7    2.13    3.50
   0  -2  -8  577.07   21.94
   0  -2  -8  586.93   25.74
   0   2   8  588.89   21.47
   0  -2  -9  196.60   14.73
   0  -2  -9  197.79   16.95
   0   2   9  203.04   13.79
   0  -2 -10   13.28    6.36
   0  -2 -10   16.78    7.26
   0   2  10   16.39    5.81
   0  -2 -11  204.62   17.08
   0  -2 -11  183.96   18.66
   0   2  11  187.80   14.17
   0  -2 -12   11.10    7.00
   0  -2 -12    7.00    7.21
   0   2  12   13.32    5.98
   0  -2 -13    4.27    6.66
   0  -2 -13    3.67    6.75
   0   2  13    6.02    5.17
   0  -2 -14   23.61   10.25
   0  -2 -14   29.20   11.65
   0  -2 -15   -2.31    7.21
   0  -2 -15    1.20    8.28
   0  -2 -16   -4.87    6.70
   0  -2 -16   -1.28    7.86
   0  -2 -17   60.88   16.39
   0  -2 -17   48.41   16.44
   0  -2 -18   13.32   11.27
   0  -2 -18   11.78   11.44
   0  -2 -19   48.75   16.52
   0  -2 -20   26.68   15.84
   0  -2 -21    3.42   12.04
   0  -2 -22   15.71   15.24
   0   3 -20    4.40   12.85
   0  -3  19   13.15   14.00
   0   3 -19    8.54   13.06
   0   3 -19   -7.21   10.72
   0  -3  18    9.31   12.08
   0   3 -18    1.20   10.46
   0   3 -18   20.41   13.70
   0  -3  17   38.68   15.11
   0   3 -17   41.80   15.92
   0   3 -17   43.76   17.03
   0  -3  16   45.25   15.63
   0   3 -16   40.94   16.52
   0   3 -16   48.46   15.84
   0  -3  15   33.43   13.53
   0   3 -15   21.35   12.89
   0   3 -15   39.36   14.26
   0  -3  14   41.28   12.76
   0   3 -14  100.67   20.75
   0   3 -14   89.48   18.02
   0  -3  13   26.43   11.27
   0   3 -13   17.42   10.67
   0   3 -13   25.02   10.84
   0  -3  12    0.60    6.36
   0   3 -12    2.95    7.68
   0   3 -12    5.89    7.64
   0  -3  11   41.28   11.65
   0   3 -11   45.21   13.45
   0   3 -11   48.24   12.21
   0  -3  10   69.67   13.62
   0   3 -10   84.57   16.44
   0   3 -10   46.79   11.65
   0  -3   9  555.77   27.88
   0   3  -9  657.33   32.40
   0   3  -9  607.81   28.95
   0  -3   8    8.50    5.59
   0   3  -8    9.86    6.75
   0   3  -8    8.75    5.85
   0  -3   7  132.52   13.53
   0   3  -7  111.77    4.99
   0   3  -7  102.76    4.70
   0   3  -7  124.19   14.09
   0   3  -7  136.87   13.49
   0  -3   6   -0.81    4.44
   0   3  -6   -0.21    1.62
   0   3  -6   -5.85    6.49
   0   3  -6    2.82    4.78
   0  -3   5 3020.42   49.82
   0   3  -5 3579.56   30.18
   0   3  -5 3497.59   29.63
   0   3  -5 3750.80   60.24
   0   3  -5 3689.41   54.86
   0  -3   4 3369.39   41.58
   0  -3   4 3262.02   48.50
   0   3  -4 3025.80   29.67
   0   3  -4 3408.92   53.66
   0   3  -3  620.40   14.60
   0   3  -3  641.88   22.20
   0  -3   2   17.55    5.12
   0   3  -2   21.35    4.40
   0   3  -2   19.89    5.93
   0  -3   1  134.35    9.95
   0   3  -1  144.77    8.62
   0   3  -1  132.35    9.22
   0  -3   0    2.13    3.50
   0   3   0    5.81    3.24
   0   3   0    5.21    3.54
   0  -3  -1   84.36    8.50
   0   3   1   74.50    7.43
   0  -3  -2  255.60   12.89
   0   3   2  289.41   13.45
   0  -3  -3 2664.29   28.60
   0  -3  -3 2426.02   38.94
   0   3   3 2510.85   39.23
   0  -3  -4 1329.35   21.73
   0  -3  -4 1170.66   29.29
   0   3   4 1144.75   27.84
   0  -3  -5  853.67   19.30
   0  -3  -5  870.53   27.07
   0   3   5  805.94   24.59
   0  -3  -6  874.68   21.47
   0  -3  -6  908.74   29.20
   0   3   6  861.61   26.34
   0  -3  -7  121.76   10.80
   0  -3  -7  112.19   12.59
   0   3   7  118.30   11.48
   0  -3  -8   22.33    6.28
   0  -3  -8   17.80    7.43
   0   3   8   22.54    7.09
   0  -3  -9   54.18    9.18
   0  -3  -9   66.81   12.25
   0   3   9   65.79   11.10
   0  -3 -10   40.00    9.09
   0  -3 -10   38.21   10.03
   0   3  10   52.60   10.12
   0  -3 -11    1.02    4.95
   0  -3 -11    6.49    6.83
   0   3  11   -0.68    4.53
   0  -3 -12    7.04    6.70
   0  -3 -12   18.14    9.61
   0   3  12   11.78    6.23
   0  -3 -13  148.65   17.12
   0  -3 -13  162.10   23.48
   0   3  13  155.19   15.41
   0  -3 -14    2.56    6.66
   0  -3 -14    0.98    7.47
   0   3  14    4.18    5.55
   0  -3 -15   35.01   11.95
   0  -3 -15   37.87   13.32
   0  -3 -16  106.73   18.61
   0  -3 -16  118.68   21.56
   0  -3 -17   10.25    9.69
   0  -3 -17   11.83   11.10
   0  -3 -18   51.74   17.59
   0  -3 -19   11.10   13.36
   0  -3 -20   -1.32   10.25
   0  -3 -21    0.17   12.04
   0   4 -20    0.34   13.66
   0  -4  19    5.34   16.78
   0   4 -19   15.07   14.30
   0  -4  18    0.90    9.82
   0   4 -18    4.14    9.73
   0   4 -18  -14.47    9.43
   0  -4  17    7.68   10.59
   0   4 -17   13.62   12.81
   0   4 -17   -1.88   10.67
   0  -4  16    9.65   11.27
   0   4 -16   -3.50    9.39
   0   4 -16    2.56   10.25
   0  -4  15   38.12   14.26
   0   4 -15   14.73   11.87
   0   4 -15   28.43   13.32
   0  -4  14   -1.84    7.30
   0   4 -14   -0.47    9.31
   0   4 -14    5.51    8.58
   0  -4  13  115.78   20.19
   0   4 -13   94.56   20.32
   0   4 -13  113.99   19.68
   0  -4  12    2.31    6.75
   0   4 -12   12.17    8.88
   0   4 -12   15.50    8.79
   0  -4  11   17.16    9.18
   0   4 -11   15.11    8.92
   0   4 -11   17.25    9.78
   0  -4  10  189.81   19.13
   0   4 -10  209.79   20.79
   0   4 -10  217.35   20.07
   0  -4   9   11.78    7.30
   0   4  -9   14.22    8.54
   0   4  -9   16.52    8.07
   0  -4   8   -1.37    5.29
   0   4  -8    1.41    1.88
   0   4  -8    1.15    1.54
   0   4  -8   -4.78    4.61
   0   4  -8   -2.82    5.12
   0  -4   7  125.00   13.83
   0   4  -7  142.34    6.83
   0   4  -7  141.31   15.16
   0   4  -7  129.61   13.41
   0  -4   6  217.86   16.48
   0   4  -6  174.40    8.50
   0   4  -6  241.51   18.61
   0  -4   5  633.72   25.19
   0   4  -5  758.08   18.31
   0   4  -5  631.50   27.54
   0  -4   4  431.02   20.24
   0   4  -4  532.37   15.58
   0   4  -4  441.56   21.47
   0  -4   3  176.49   13.19
   0   4  -3  166.46    9.78
   0   4  -3  187.55   14.13
   0  -4   2  150.70   11.53
   0   4  -2  129.44    9.22
   0   4  -2  136.19   11.14
   0  -4   1   76.89    8.84
   0   4  -1   70.57    7.56
   0   4  -1   66.81    7.86
   0  -4   0   53.49    8.32
   0   4   0   54.56    8.03
   0   4   0   52.98    7.34
   0  -4  -1 1500.37   32.19
   0   4   1 1525.30   32.02
   0   4   1 1470.40   26.85
   0  -4  -2  802.61   24.38
   0   4   2  906.27   25.83
   0  -4  -3  332.36   12.12
   0  -4  -3  441.39   19.08
   0   4   3  445.83   19.08
   0  -4  -4 1450.59   24.55
   0  -4  -4 1798.19   39.19
   0   4   4 1800.92   38.72
   0  -4  -5  264.69   11.57
   0  -4  -5  248.25   16.18
   0   4   5  222.47   15.11
   0  -4  -6  314.47   13.23
   0  -4  -6  317.84   19.17
   0   4   6  294.79   17.63
   0  -4  -7  375.82   15.54
   0  -4  -7  348.07   20.96
   0   4   7  355.16   20.11
   0  -4  -8    0.47    3.59
   0  -4  -8   -0.55    4.14
   0   4   8   -0.94    4.65
   0  -4  -9   17.38    6.10
   0  -4  -9   14.34    7.17
   0   4   9   18.91    7.09
   0  -4 -10  146.60   12.94
   0  -4 -10  142.34   16.86
   0   4  10  154.72   15.16
   0  -4 -11   70.19   11.65
   0  -4 -11   74.54   14.43
   0   4  11   79.66   13.62
   0  -4 -12   65.40   12.25
   0  -4 -12   69.16   15.45
   0   4  12   63.14   12.76
   0  -4 -13    0.17    7.56
   0  -4 -13    6.79    7.51
   0   4  13    3.80    6.79
   0  -4 -14   82.52   15.50
   0  -4 -14   50.68   14.60
   0   4  14   75.61   14.98
   0  -4 -15   55.33   13.41
   0  -4 -15   18.53   12.25
   0  -4 -16  152.45   24.12
   0  -4 -17   47.00   15.45
   0  -4 -18   29.16   14.81
   0  -4 -19    5.38   11.95
   0  -4 -20   -5.64    9.39
   0  -4 -21   21.05   15.45
   0   5 -19   -7.86   10.89
   0  -5  18   12.25   13.28
   0   5 -18   11.48   13.70
   0  -5  17    3.20   10.46
   0   5 -17   -1.45    9.18
   0  -5  16   -0.77    9.90
   0   5 -16   -1.92    9.05
   0   5 -16    4.10   10.54
   0  -5  15   -4.27    8.62
   0   5 -15   -4.23    7.94
   0   5 -15    0.73    9.52
   0  -5  14   22.03   12.25
   0   5 -14   22.03   13.66
   0   5 -14   17.55   11.27
   0  -5  13    9.52   10.12
   0   5 -13    2.09    8.45
   0   5 -13    3.63    8.58
   0  -5  12    4.57    8.32
   0   5 -12   -1.37    7.21
   0   5 -12    9.26    9.18
   0  -5  11    2.18    7.21
   0   5 -11    3.76    7.34
   0  -5  10    1.41    6.87
   0   5 -10   -2.77    6.19
   0  -5   9   -3.54    5.34
   0   5  -9    1.28    6.92
   0  -5   8   -1.28    5.55
   0   5  -8   -0.94    2.65
   0   5  -8   -0.68    5.76
   0  -5   7    7.00    5.72
   0   5  -7    6.53    3.37
   0   5  -7    4.35    6.23
   0  -5   6   54.13   10.37
   0   5  -6   52.34    6.92
   0   5  -6   71.21   13.70
   0  -5   5   58.57   11.01
   0   5  -5   64.21    8.88
   0   5  -5   56.44   11.36
   0  -5   4  641.66   25.96
   0   5  -4  717.87   21.05
   0   5  -4  786.22   30.48
   0  -5   3  896.19   29.50
   0   5  -3  813.20   23.95
   0   5  -3  931.88   31.17
   0  -5   2  722.99   25.91
   0   5  -2  655.92   21.60
   0   5  -2  742.12   26.30
   0  -5   1  936.71   29.03
   0   5  -1  916.00   26.08
   0   5  -1 1072.72   29.59
   0  -5   0  409.12   19.77
   0   5   0  378.38   17.72
   0   5   0  397.25   17.38
   0  -5  -1   17.67    6.66
   0   5   1   21.82    6.83
   0   5   1   17.63    5.51
   0  -5  -2    5.17    5.38
   0   5   2    8.84    5.34
   0  -5  -3  503.34   22.33
   0   5   3  497.88   22.41
   0  -5  -4  843.04   20.92
   0  -5  -4  744.76   27.96
   0   5   4  737.46   27.49
   0  -5  -5   -4.48    2.60
   0  -5  -5    7.86    6.32
   0   5   5    5.25    5.51
   0  -5  -6  375.82   14.81
   0  -5  -6  392.04   22.37
   0   5   6  455.65   23.40
   0  -5  -7   51.79    7.68
   0  -5  -7   51.66   10.76
   0   5   7   37.70    9.48
   0  -5  -8   41.11    7.34
   0  -5  -8   33.47    9.48
   0   5   8   31.51    9.61
   0  -5  -9  252.74   14.60
   0  -5  -9  235.70   19.94
   0   5   9  245.44   18.70
   0  -5 -10    4.74    4.70
   0  -5 -10    6.45    6.40
   0   5  10    2.35    6.62
   0  -5 -11    9.48    5.93
   0  -5 -11    7.43    7.68
   0   5  11    6.92    6.79
   0  -5 -12    4.78    5.98
   0  -5 -12    0.64    6.53
   0   5  12   -0.85    5.98
   0  -5 -13  170.04   16.48
   0  -5 -13  176.32   21.94
   0   5  13  182.94   19.34
   0  -5 -14   -1.66    7.13
   0  -5 -14   -2.01    6.92
   0   5  14    0.26    7.56
   0  -5 -15  160.31   25.23
   0   5  15  158.73   22.11
   0  -5 -16   12.55   11.57
   0  -5 -17   12.34   11.06
   0  -5 -18    4.99   11.40
   0  -5 -19   16.69   14.13
   0  -5 -20   18.96   15.03
   0  -5 -21   -4.87   11.95
   0   6 -18   -1.58   11.48
   0  -6  17    5.89   11.53
   0   6 -17   -0.38   11.31
   0  -6  16    3.50   10.08
   0   6 -16   -4.48   10.16
   0  -6  15   -1.71    9.14
   0   6 -15    3.33    9.61
   0  -6  14   11.31   10.37
   0   6 -14   -7.60    8.75
   0  -6  13    0.00    7.64
   0   6 -13    1.49    9.52
   0  -6  12   43.33   13.58
   0   6 -12   51.06   16.65
   0  -6  11    8.24    8.67
   0   6 -11   22.75   11.65
   0  -6  10    2.09    7.00
   0   6 -10    9.65    9.69
   0  -6   9   15.41    8.97
   0   6  -9   26.55   11.06
   0  -6   8   12.12    7.81
   0   6  -8    8.92    4.44
   0   6  -8    6.45    7.64
   0  -6   7   14.05    7.30
   0   6  -7   20.24    5.42
   0   6  -7   18.44    9.18
   0  -6   6    4.65    5.64
   0   6  -6   -0.51    3.54
   0   6  -6    6.45    6.62
   0   6  -5  124.19   10.59
   0   6  -5  119.75   14.94
   0  -6   4  333.13   21.18
   0   6  -4  330.05   16.52
   0   6  -4  370.91   22.58
   0  -6   3  200.44   16.74
   0   6  -3  196.13   14.77
   0   6  -3  221.87   17.55
   0  -6   2 1156.32   35.86
   0   6  -2 1134.29   31.42
   0   6  -2 1114.82   34.67
   0  -6   1   77.49   12.25
   0   6  -1   78.89   12.21
   0   6  -1   71.64   10.89
   0  -6   0  890.86   31.12
   0   6   0  792.88   29.20
   0   6   0  856.10   27.58
   0  -6  -1  292.74   18.83
   0   6   1  291.42   19.51
   0  -6  -2  453.22   23.27
   0   6   2  467.56   23.48
   0  -6  -3   79.54   12.76
   0   6   3   80.26   13.49
   0  -6  -4   43.12    7.34
   0  -6  -4   37.36    9.73
   0   6   4   55.84   11.78
   0  -6  -5  350.63   15.16
   0  -6  -5  350.93   22.11
   0   6   5  364.21   22.29
   0  -6  -6   18.49    5.21
   0  -6  -6   22.20    8.45
   0   6   6   27.07    9.18
   0  -6  -7    8.50    4.10
   0  -6  -7    2.95    5.17
   0   6   7    7.73    6.53
   0  -6  -8  159.24   11.40
   0  -6  -8  156.47   17.33
   0   6   8  157.75   16.27
   0  -6  -9   68.69    9.90
   0  -6  -9   66.17   13.58
   0   6   9   72.02   14.05
   0  -6 -10    0.90    4.23
   0  -6 -10   -1.24    6.23
   0   6  10    0.04    6.10
   0  -6 -11    1.92    4.78
   0  -6 -11   -1.79    5.59
   0   6  11   16.14    9.31
   0  -6 -12  203.94   16.65
   0  -6 -12  176.75   21.56
   0   6  12  187.76   20.79
   0  -6 -13    7.26    9.86
   0   6  13    2.95    7.73
   0  -6 -14   99.05   19.98
   0   6  14   95.72   18.70
   0  -6 -15   24.42   12.47
   0   6  15   16.61    9.56
   0  -6 -16    2.73    9.18
   0   6  16    7.98    8.84
   0  -6 -17   29.41   15.50
   0  -6 -18    9.39   13.32
   0  -6 -19   62.25   21.18
   0  -6 -20   16.01   13.41
   0  -6 -21   26.68   17.67
   0   7 -17   -1.92    9.52
   0  -7  16    2.43   10.37
   0   7 -16    0.64   12.17
   0  -7  15   20.28   13.32
   0   7 -15   17.16   13.19
   0  -7  14    6.36    9.39
   0   7 -14   -4.18    7.26
   0  -7  13    4.01    9.05
   0   7 -13   -4.99    7.81
   0  -7  12   28.56   12.30
   0   7 -12   31.55   13.96
   0  -7  11   20.41   10.72
   0   7 -11   17.55   11.27
   0  -7  10   42.52   13.32
   0   7 -10   53.15   15.71
   0  -7   9   -1.66    6.57
   0   7  -9   -3.37    6.15
   0  -7   8   -1.66    6.36
   0   7  -8    0.17    6.79
   0  -7   7    3.20    7.21
   0   7  -7   11.91    6.19
   0   7  -7   11.36    8.54
   0  -7   6    4.95    6.53
   0   7  -6    2.65    4.40
   0   7  -6    1.41    6.45
   0  -7   5    9.61    6.66
   0   7  -5   17.80    6.87
   0   7  -5   10.25    7.56
   0  -7   4   21.69    8.71
   0   7  -4   20.92    7.17
   0   7  -4   22.93    8.41
   0  -7   3 1522.66   45.08
   0   7  -3 1539.14   38.89
   0   7  -3 1512.96   45.17
   0  -7   2    8.32    6.28
   0   7  -2   -2.18    4.57
   0   7  -2    3.33    5.76
   0  -7   1 2001.75   50.25
   0   7  -1 1926.69   45.77
   0   7  -1 1964.18   47.05
   0  -7   0  473.11   25.79
   0   7   0  520.33   25.74
   0   7   0  532.54   23.95
   0  -7  -1  208.08   17.89
   0   7   1  199.29   18.19
   0  -7  -2  199.33   18.74
   0   7   2  232.20   18.83
   0  -7  -3   63.65   12.25
   0   7   3   87.99   14.69
   0  -7  -4  235.79   18.96
   0   7   4  249.96   19.47
   0  -7  -5    8.07    4.48
   0  -7  -5    2.09    5.68
   0   7   5   -1.49    4.65
   0  -7  -6   14.73    5.25
   0  -7  -6    3.33    5.64
   0   7   6    3.84    6.10
   0  -7  -7  106.52    9.82
   0  -7  -7  121.33   17.85
   0   7   7  127.39   15.63
   0  -7  -8  343.80   16.52
   0  -7  -8  318.10   24.63
   0   7   8  326.30   24.25
   0  -7  -9   48.46    8.58
   0  -7  -9   34.71   11.48
   0   7   9   41.92   12.30
   0  -7 -10    6.06    4.65
   0  -7 -10   -0.09    6.92
   0   7  10    5.29    8.37
   0  -7 -11  290.39   17.38
   0  -7 -11  331.25   27.37
   0   7  11  317.59   25.62
   0  -7 -12   31.63   13.19
   0   7  12   23.14   10.97
   0  -7 -13  137.00   23.86
   0   7  13  128.12   21.94
   0  -7 -14    7.56    9.48
   0   7  14   18.70   11.31
   0  -7 -15    3.54    9.31
   0   7  15    3.33    9.35
   0  -7 -16   42.69   16.44
   0   7  16   43.20   15.20
   0  -7 -17    4.57   10.63
   0  -7 -18   45.00   18.66
   0  -7 -19   -7.64   10.84
   0  -7 -20    1.71   13.15
   0   8 -16   -0.47   12.30
   0  -8  15    2.35   11.10
   0   8 -15   -8.07    8.67
   0  -8  14   14.05   12.68
   0   8 -14    1.49    9.56
   0  -8  13    1.37    9.52
   0   8 -13    4.18   10.80
   0  -8  12   17.16   11.40
   0   8 -12   17.16   12.94
   0  -8  11    4.99    9.61
   0   8 -11   14.81   12.85
   0  -8  10   -5.93    5.72
   0   8 -10    0.77    9.73
   0  -8   9   12.94    9.73
   0   8  -9   19.77   11.83
   0  -8   8   57.21   14.39
   0   8  -8   72.28   17.50
   0  -8   7    2.39    7.43
   0   8  -7    4.27    9.95
   0   8  -7   11.91    9.73
   0  -8   6   24.21    9.69
   0   8  -6   13.36    6.92
   0   8  -6   25.44   10.72
   0  -8   5   19.08    9.14
   0   8  -5   15.41    7.17
   0   8  -5   16.99    8.84
   0  -8   4   58.06   12.89
   0   8  -4   84.79   13.28
   0   8  -4   79.49   15.80
   0  -8   3   53.28   11.91
   0   8  -3   78.72   13.23
   0   8  -3   69.80   14.73
   0  -8   2  191.43   19.08
   0   8  -2  207.10   17.46
   0   8  -2  207.91   18.70
   0  -8   1 1089.29   40.51
   0   8  -1 1127.11   38.21
   0   8  -1 1212.58   39.92
   0  -8   0   -0.38    5.25
   0   8   0    1.02    6.02
   0   8   0   -1.66    4.57
   0  -8  -1  600.17   30.14
   0   8   1  558.24   28.22
   0  -8  -2   -0.34    5.51
   0   8   2    1.96    5.68
   0  -8  -3  152.67   16.69
   0   8   3  141.95   16.18
   0  -8  -4   51.96   11.78
   0   8   4   65.83   13.70
   0  -8  -5  164.24   12.72
   0  -8  -5  198.48   19.89
   0   8   5  187.12   18.74
   0  -8  -6    2.39    4.23
   0  -8  -6   -0.60    5.93
   0   8   6    8.88    8.24
   0  -8  -7  144.94   11.91
   0  -8  -7  159.75   18.40
   0   8   7  158.26   21.94
   0  -8  -8  248.98   14.94
   0  -8  -8  253.51   23.61
   0   8   8  263.50   23.27
   0  -8  -9  145.24   12.30
   0  -8  -9  127.78   20.11
   0   8   9  131.45   21.39
   0  -8 -10   21.90   11.36
   0   8  10   31.12   12.17
   0  -8 -11    6.62    7.94
   0   8  11   -3.42    8.03
   0  -8 -12   52.72   16.05
   0   8  12   60.92   17.55
   0  -8 -13   16.69   11.70
   0   8  13   -1.49    8.41
   0  -8 -14    1.54    9.09
   0   8  14   13.36   10.63
   0  -8 -15   47.22   17.03
   0   8  15   37.65   15.92
   0  -8 -16   -1.41   10.76
   0   8  16   -0.90    9.39
   0  -8 -17   83.89   22.71
   0   8  17   60.03   17.29
   0  -8 -18   -0.21   11.10
   0  -8 -19   -0.51   13.41
   0  -8 -20   -0.43   12.81
   0  -9  15   -7.68   17.67
   0   9 -15   -3.50    9.73
   0  -9  14   -7.43   10.08
   0   9 -14    5.51   11.36
   0  -9  13   -6.23    9.78
   0   9 -13   12.51   13.96
   0  -9  12   -2.60    8.45
   0   9 -12    2.01    9.95
   0  -9  11    8.41    9.09
   0   9 -11    6.15   10.76
   0  -9  10   -4.74    7.73
   0   9 -10    6.66   11.06
   0  -9   9   63.87   16.61
   0   9  -9   78.13   19.47
   0  -9   8   11.83   10.20
   0   9  -8   -3.33    7.21
   0  -9   7   72.88   16.39
   0   9  -7   59.26   16.01
   0  -9   6    1.66    7.21
   0   9  -6    5.72    6.92
   0   9  -6   -7.30    5.81
   0  -9   5   34.24   11.87
   0   9  -5   39.40   11.14
   0   9  -5   45.21   13.49
   0  -9   4    0.17    6.28
   0   9  -4    1.28    6.23
   0   9  -4    4.06    7.39
   0  -9   3  253.76   23.40
   0   9  -3  208.94   20.24
   0   9  -3  241.64   22.29
   0  -9   2  646.19   34.20
   0   9  -2  656.05   31.25
   0   9  -2  675.09   33.21
   0  -9   1    4.14    7.26
   0   9  -1   -1.11    6.06
   0   9  -1    0.26    5.81
   0  -9   0  803.81   37.40
   0   9   0  782.80   35.31
   0   9   0  873.05   35.05
   0  -9  -1   11.95    9.26
   0   9   1   13.87    8.88
   0  -9  -2  293.12   23.61
   0   9   2  294.70   23.18
   0  -9  -3    1.75    6.28
   0   9   3   -0.90    5.93
   0  -9  -4   51.10   12.85
   0   9   4   51.87   13.19
   0  -9  -5   54.13   10.03
   0  -9  -5   44.61   13.02
   0   9   5   58.62   14.86
   0  -9  -6   13.49    6.02
   0  -9  -6   13.66   10.12
   0   9   6    8.41    8.28
   0  -9  -7    3.59    4.70
   0  -9  -7  -10.59    4.99
   0   9   7    2.31   10.33
   0  -9  -8   21.69    6.83
   0  -9  -8    8.45    7.73
   0   9   8   14.69    9.90
   0  -9  -9   15.75   10.76
   0   9   9    6.92   11.06
   0  -9 -10   71.68   17.25
   0   9  10   83.21   18.23
   0  -9 -11    2.95    9.31
   0   9  11   17.08   12.12
   0  -9 -12   -0.55    9.14
   0   9  12   10.93   11.19
   0  -9 -13    3.71   11.23
   0   9  13    3.71   11.19
   0  -9 -14   34.11   15.50
   0   9  14   91.32   21.99
   0  -9 -15    0.68    9.86
   0   9  15    9.35   11.36
   0  -9 -16   83.51   23.61
   0   9  16   44.06   15.88
   0  -9 -17   -9.99   10.80
   0   9  17   -5.89   11.19
   0  -9 -18    0.77   10.67
   0  -9 -19   -3.12   13.23
   0 -10  14   -4.44   16.39
   0  10 -14    4.61   13.32
   0 -10  13   -4.27   10.33
   0  10 -13    5.76   12.12
   0 -10  12   19.34   12.59
   0  10 -12   12.72   13.96
   0 -10  11    0.47    9.48
   0  10 -11    9.26   12.59
   0 -10  10    7.51   10.25
   0  10 -10   13.19   12.25
   0 -10   9    2.90    9.22
   0  10  -9   -4.18    8.62
   0 -10   8   35.48   13.87
   0  10  -8   44.02   15.41
   0 -10   7   12.42   10.84
   0  10  -7   13.87   11.23
   0 -10   6   89.10   18.06
   0  10  -6  102.46   20.53
   0 -10   5   76.21   16.95
   0  10  -5   97.21   18.19
   0  10  -5   88.63   18.53
   0 -10   4    9.01    8.50
   0  10  -4    0.43    7.17
   0  10  -4   18.44   10.76
   0 -10   3   87.18   17.72
   0  10  -3   90.42   17.25
   0  10  -3   95.93   18.06
   0 -10   2  297.65   26.30
   0  10  -2  258.37   23.05
   0  10  -2  256.75   23.31
   0 -10   1  348.67   27.11
   0  10  -1  357.33   26.38
   0  10  -1  379.28   26.38
   0 -10   0   87.13   17.72
   0  10   0   71.68   16.09
   0 -10  -1   88.84   17.12
   0  10   1  108.69   20.11
   0 -10  -2  182.00   21.47
   0  10   2  257.31   25.70
   0 -10  -3    0.09    7.04
   0  10   3    9.99   10.03
   0 -10  -4   60.84   14.64
   0  10   4   77.02   17.63
   0 -10  -5   12.25    6.53
   0 -10  -5   11.14    8.88
   0  10   5    7.77    8.37
   0 -10  -6   61.01   11.27
   0 -10  -6   37.18   13.06
   0  10   6   64.55   16.18
   0 -10  -7   10.29    7.04
   0 -10  -7   10.37   10.16
   0  10   7   20.28   12.21
   0 -10  -8   34.32   12.98
   0  10   8   21.56   11.65
   0 -10  -9   -5.34    8.41
   0  10   9    1.71    9.05
   0 -10 -10   96.36   20.75
   0  10  10  102.63   21.69
   0 -10 -11    8.28   10.25
   0  10  11   13.66   11.44
   0 -10 -12   48.41   17.29
   0  10  12   49.35   16.52
   0 -10 -13   27.62   14.77
   0  10  13   13.23   12.25
   0 -10 -14    0.30   11.83
   0  10  14    1.79   12.25
   0 -10 -15   96.36   24.16
   0  10  15   60.75   20.15
   0 -10 -16    2.09   12.51
   0  10  16    4.78   13.49
   0 -10 -17   23.52   15.20
   0  10  17   24.93   16.14
   0 -10 -18    9.14   15.37
   0  10  18    7.68   13.62
   0 -11  13   10.33   14.22
   0  11 -13   -7.04    8.97
   0 -11  12    8.97   12.89
   0  11 -12    4.91   11.57
   0 -11  11    8.32   12.98
   0  11 -11    5.93   11.44
   0 -11  10   15.92   12.51
   0  11 -10   32.36   16.78
   0 -11   9    2.65   10.25
   0  11  -9    2.73   12.08
   0 -11   8    7.73   11.06
   0  11  -8    0.64    9.05
   0 -11   7   12.85   11.40
   0  11  -7   -1.11    9.82
   0 -11   6   32.10   14.26
   0  11  -6   38.76   14.90
   0 -11   5    4.61   10.29
   0  11  -5   20.02   12.51
   0  11  -5    5.76    9.05
   0 -11   4  132.69   23.65
   0  11  -4  139.69   22.20
   0  11  -4  183.62   27.24
   0 -11   3    4.14    9.48
   0  11  -3    8.62    9.99
   0  11  -3    1.37    8.41
   0 -11   2  146.95   23.18
   0  11  -2  127.39   23.52
   0  11  -2  147.33   22.03
   0 -11   1    3.24    8.97
   0  11  -1   -6.57    7.47
   0 -11   0  172.09   24.76
   0  11   0  171.11   24.16
   0 -11  -1  124.28   21.35
   0  11   1  145.07   22.29
   0 -11  -2   39.28   13.58
   0  11   2   53.49   15.16
   0 -11  -3  130.94   22.75
   0  11   3  155.19   23.52
   0 -11  -4  149.21   24.80
   0  11   4  106.73   20.79
   0 -11  -5    9.39    6.70
   0 -11  -5    9.14    9.95
   0  11   5    8.79   10.59
   0 -11  -6    5.46    9.86
   0  11   6    7.81   10.97
   0 -11  -7   12.30   11.78
   0  11   7   17.80   13.49
   0 -11  -8    9.61   10.93
   0  11   8    4.48   10.50
   0 -11  -9   30.99   14.64
   0  11   9   22.54   14.26
   0 -11 -10    0.60   10.89
   0  11  10    1.37   10.29
   0 -11 -11    6.83    9.99
   0  11  11    5.29    9.95
   0 -11 -12   -9.31   10.08
   0  11  12    7.21   12.64
   0 -11 -13    9.31   12.00
   0  11  13   17.29   13.75
   0 -11 -14   28.82   16.74
   0  11  14   21.60   14.60
   0 -11 -15   21.47   16.01
   0  11  15   26.94   15.45
   0 -11 -16   -2.90   13.96
   0  11  16  -10.12   12.08
   0 -11 -17   34.71   18.31
   0  11  17   58.83   19.94
   0  11  18    5.85   14.09
   0 -12  12    2.48   14.77
   0 -12  11    8.07   13.32
   0  12 -11   -0.21   12.72
   0 -12  10   -0.30   11.78
   0  12 -10    4.23   13.92
   0 -12   9   30.14   16.74
   0  12  -9   22.20   15.88
   0 -12   8   -3.42   10.08
   0  12  -8    8.88   12.12
   0 -12   7    5.68   11.78
   0  12  -7   10.29   12.68
   0 -12   6   51.02   18.19
   0  12  -6   50.72   17.67
   0 -12   5   81.67   20.36
   0  12  -5   92.86   22.11
   0 -12   4  120.65   23.74
   0  12  -4  109.04   20.28
   0  12  -4  112.79   22.41
   0 -12   3   77.74   20.49
   0  12  -3  109.68   20.49
   0  12  -3  103.53   21.60
   0 -12   2    9.43   10.12
   0  12  -2    2.48    9.61
   0  12  -2   -5.12    8.45
   0 -12   1    0.43   10.93
   0  12  -1   13.23   12.98
   0 -12   0  100.11   22.03
   0  12   0   84.02   18.87
   0 -12  -1   10.46   10.72
   0  12   1    5.93   10.97
   0 -12  -2    8.24   11.40
   0  12   2   43.55   16.69
   0 -12  -3   58.15   16.91
   0  12   3   78.72   19.89
   0 -12  -4   -3.54    9.73
   0  12   4    7.77   11.53
   0 -12  -5   29.63   15.67
   0  12   5   43.84   15.92
   0 -12  -6   22.29   12.42
   0  12   6   24.04   13.58
   0 -12  -7    1.07    8.97
   0  12   7    1.24    9.26
   0 -12  -8   29.33   15.97
   0  12   8   10.20   13.02
   0 -12  -9    2.65   10.25
   0  12   9    5.51   10.80
   0 -12 -10    9.65   12.17
   0  12  10   22.93   13.96
   0 -12 -11    5.51   10.37
   0  12  11   11.78   13.66
   0 -12 -12    3.33   12.89
   0  12  12   -6.23   10.63
   0 -12 -13   -2.52   11.53
   0  12  13   -2.60   13.28
   0 -12 -14   26.43   18.10
   0  12  14   10.76   16.31
   0 -12 -15   10.37   16.22
   0  12  15   19.25   15.80
   0 -12 -16   24.63   18.02
   0  12  16   23.18   18.78
   0  12  17   -3.63   12.51
   0  12  18    6.19   16.18
   0 -13  11    2.77   20.49
   0 -13  10    4.06   13.66
   0  13 -10    4.01   13.19
   0 -13   9  -11.06   11.36
   0  13  -9    0.90   12.00
   0 -13   8   11.87   13.28
   0  13  -8  -12.55   10.50
   0 -13   7    5.17   12.64
   0  13  -7   -1.66    9.90
   0 -13   6   19.98   13.06
   0  13  -6   22.80   15.80
   0 -13   5   40.39   16.82
   0  13  -5   50.46   18.53
   0 -13   4    2.90   12.04
   0  13  -4    6.87   11.57
   0 -13   3   79.19   20.71
   0  13  -3   71.21   19.51
   0  13  -3   66.77   18.27
   0 -13   2    1.11   11.23
   0  13  -2    5.34   11.87
   0 -13   1   76.85   19.30
   0  13  -1  112.24   23.01
   0 -13   0    9.26   11.78
   0  13   0    0.47   10.42
   0 -13  -1   34.03   15.71
   0  13   1   45.68   15.71
   0 -13  -2   -0.77    9.48
   0  13   2    6.62   12.55
   0 -13  -3   -1.02    9.52
   0  13   3   10.08   11.31
   0 -13  -4    5.64   11.65
   0  13   4    4.35   10.67
   0 -13  -5   82.65   21.52
   0  13   5   73.17   20.45
   0 -13  -6   -2.31   10.97
   0  13   6    0.98   10.03
   0 -13  -7   64.12   19.68
   0  13   7   48.16   18.57
   0 -13  -8    0.85   11.36
   0  13   8   -0.73   11.06
   0 -13  -9    9.52   14.17
   0  13   9   13.11   13.53
   0 -13 -10   -3.07   13.36
   0  13  10    7.09   14.39
   0 -13 -11    9.52   14.39
   0  13  11   -0.98   13.53
   0 -13 -12  -10.12   12.12
   0  13  12    1.11   14.47
   0 -13 -13   -1.45   13.58
   0  13  13   -6.23   14.69
   0 -13 -14    0.81   14.64
   0  13  14    0.68   12.94
   0 -13 -15    5.25   16.14
   0  13  15    4.53   17.29
   0  13  16   26.13   19.64
   0 -14   9    1.37   14.22
   0  14  -9   -4.74   14.69
   0 -14   8   -0.30   13.11
   0  14  -8   -3.07   11.91
   0 -14   7   19.08   15.07
   0  14  -7   13.45   14.56
   0 -14   6    2.01   13.83
   0  14  -6    5.34   12.94
   0 -14   5    4.35   13.66
   0  14  -5   -5.04    9.22
   0 -14   4   15.97   14.69
   0 -14   3   42.99   16.48
   0 -14   2    2.90   12.59
   0  14  -2   22.07   15.50
   0 -14   1   64.38   21.47
   0  14  -1   42.44   17.29
   0 -14   0   87.90   23.40
   0  14   0   94.95   23.57
   0 -14  -1   38.55   18.36
   0  14   1    2.69   13.28
   0 -14  -2    2.56   11.31
   0  14   2   13.28   15.28
   0 -14  -3    5.85   14.34
   0  14   3    9.01   14.30
   0 -14  -4   -2.39   10.12
   0  14   4   15.80   16.18
   0 -14  -5   -4.70   10.50
   0  14   5  -10.63   11.70
   0 -14  -6    9.22   14.81
   0  14   6    3.50   12.72
   0 -14  -7    2.56   13.53
   0  14   7    9.56   13.96
   0 -14  -8   12.51   15.20
   0  14   8    2.56   13.87
   0 -14  -9   11.23   15.16
   0  14   9    0.55   13.87
   0 -14 -10    4.87   13.53
   0  14  10   -0.64   14.05
   0 -14 -11    8.62   13.53
   0  14  11  -12.51   14.05
   0 -14 -12   -0.55   15.16
   0  14  12   -7.68   12.59
   0 -14 -13   -4.99   16.82
   0  14  13   20.15   18.10
   0  14  14   -0.17   14.39
   0 -15   8    1.24   15.80
   0 -15   7    8.15   16.27
   0  15  -7   -2.90   12.47
   0 -15   6    5.76   15.71
   0 -15   5    7.34   16.31
   0 -15   4    5.38   15.41
   0 -15   3   14.17   15.84
   0 -15   2   32.87   19.60
   0 -15   1    5.17   15.92
   0  15  -1   -8.92   15.07
   0 -15   0   31.08   19.04
   0  15   0   29.63   21.82
   0 -15  -1    3.67   13.28
   0  15   1   17.33   19.30
   0 -15  -2   18.74   15.20
   0  15   2   20.49   17.72
   0 -15  -3   19.89   15.54
   0  15   3   37.10   20.75
   0 -15  -4    3.07   14.69
   0  15   4   -4.99   13.92
   0 -15  -5   11.95   16.09
   0  15   5   -9.95   13.66
   0 -15  -6   -8.84   13.15
   0  15   6   -1.07   16.09
   0 -15  -7   15.07   17.50
   0  15   7   -0.38   17.20
   0 -15  -8   23.31   17.33
   0  15   8   10.54   16.35
   0 -15  -9   11.31   16.18
   0  15   9    0.47   14.43
   0 -15 -10   18.06   17.12
   0  15  10    8.88   15.45
   0 -15 -11    4.48   17.16
   0  15  11    2.43   19.34
   0 -16   5   18.57   18.14
   0 -16   4   24.08   19.72
   0 -16   3    9.31   16.05
   0 -16   2    9.61   16.09
   0 -16   1    1.24   14.26
   0 -16   0   24.63   19.00
   0  16   0    9.43   17.63
   0 -16  -1   -5.98   14.60
   0  16   1    1.79   17.20
   0 -16  -2   40.30   20.45
   0  16   2   32.45   21.35
   0 -16  -3    1.37   12.76
   0  16   3   -3.80   16.31
   0 -16  -4   15.92   17.46
   0  16   4   10.33   18.06
   0 -16  -5    2.01   15.11
   0  16   5    7.43   17.93
   0 -16  -6  -10.80   14.52
   0  16   6   -4.31   16.86
   0 -16  -7   -6.70   13.36
   0  16   7   -9.01   17.46
   0 -16  -8   11.31   16.52
   0  16   8    1.28   16.31
   0 -16  -9   28.77   31.42
   0 -17  -1    3.67   26.21
   0  17   1    1.96   18.49
   0 -17  -2  -12.72   25.36
   0  17   2   16.39   21.43
   0  17   3   11.19   21.35
   0  17   4    2.22   20.36
  -1  17   2    0.38   20.96
  -1  17   1   -7.21   16.48
  -1  16   6  -12.38   13.75
   1 -16  -6  -14.13   13.79
  -1  16   5   -8.84   15.24
   1 -16  -5    7.34   14.94
  -1  16   4    7.81   19.72
   1 -16  -4   -5.51   14.39
  -1  16   3   -7.94   17.67
   1 -16  -3    9.56   17.97
  -1  16   2   -1.37   17.55
   1 -16  -2   15.54   19.81
  -1  16   1   -3.59   15.97
   1 -16  -1    2.31   14.90
  -1  16   0   -6.83   15.45
   1 -16   0   22.80   19.25
   1 -16   1   -4.14   16.01
   1 -16   2   -7.51   16.05
   1 -16   3   -7.34   15.92
  -1  15  10    7.98   19.89
   1 -15 -10   11.01   18.66
  -1  15   9   29.07   20.83
   1 -15  -9   19.08   17.93
  -1  15   8   -8.50   12.98
   1 -15  -8   -9.48   11.36
  -1  15   7  -16.65   13.58
   1 -15  -7   -2.82   14.52
  -1  15   6   -3.59   15.50
   1 -15  -6   -4.27   14.52
  -1  15   5    2.52   16.05
   1 -15  -5    9.22   16.95
  -1  15   4   -2.56   18.70
   1 -15  -4   -2.95   15.84
  -1  15   3    7.90   16.48
   1 -15  -3    1.37   16.82
  -1  15   2    0.55   15.50
   1 -15  -2   14.00   16.69
  -1  15   1   -1.24   17.89
   1 -15  -1   11.06   16.74
  -1  15   0  -10.16   14.52
   1 -15   0    2.65   17.08
  -1  15  -1   -2.90   15.03
   1 -15   1   12.64   17.33
   1 -15   2    2.22   12.76
   1 -15   3   21.60   18.06
   1 -15   4    7.94   14.26
   1 -15   5    2.82   15.33
   1 -15   6   16.35   17.93
   1 -15   7  -10.37   14.13
  -1  14  12   22.24   20.15
   1 -14 -12   16.99   18.53
  -1  14  11   -8.50   12.42
   1 -14 -11    3.20   14.22
  -1  14  10    9.90   18.40
   1 -14 -10    6.02   14.60
  -1  14   9    4.14   16.91
   1 -14  -9   21.43   16.27
  -1  14   8    6.23   16.86
   1 -14  -8   -6.57   12.00
  -1  14   7   -8.50   11.23
   1 -14  -7   -9.48   12.85
  -1  14   6    7.30   14.98
   1 -14  -6   10.93   15.07
  -1  14   5   -7.30    9.82
   1 -14  -5    1.96   14.22
  -1  14   4   11.23   14.52
   1 -14  -4   12.12   13.06
  -1  14   3   11.87   14.52
   1 -14  -3    0.30   13.53
  -1  14   2   -1.88   12.98
   1 -14  -2    4.74   12.76
  -1  14   1   16.74   15.58
   1 -14  -1   12.81   14.43
  -1  14   0    3.54   13.75
   1 -14   0    5.76   15.11
  -1  14  -1   12.76   14.60
   1 -14   1   11.44   14.90
  -1  14  -2   15.16   15.16
   1 -14   2   21.05   14.94
   1 -14   3   10.80   15.88
   1 -14   4   11.36   16.44
   1 -14   5   13.06   17.08
   1 -14   6   13.11   14.73
   1 -14   7   28.22   17.59
  -1  14  -8   -7.94   11.70
   1 -14   8   16.05   15.67
   1 -14   9   20.49   17.97
   1 -14  10   -9.39   20.36
  -1  13  14    6.62   15.84
   1 -13 -14    7.34   16.14
  -1  13  13   37.36   19.64
   1 -13 -13   46.71   20.71
  -1  13  12   14.05   16.35
   1 -13 -12    3.37   15.63
  -1  13  11   -9.31   14.73
   1 -13 -11   -6.23   12.12
  -1  13  10   47.99   19.30
   1 -13 -10   51.91   19.98
  -1  13   9    1.15   13.23
   1 -13  -9    5.81   12.38
  -1  13   8   69.12   22.75
   1 -13  -8   58.83   21.09
  -1  13   7   33.56   17.80
   1 -13  -7   30.44   18.91
  -1  13   6    3.12   13.06
   1 -13  -6    7.90   11.78
  -1  13   5   70.78   21.56
   1 -13  -5   68.26   20.83
  -1  13   4    4.65   13.45
   1 -13  -4   12.12   12.64
  -1  13   3    0.81   11.27
   1 -13  -3   -0.98   10.08
  -1  13   2   -7.94   10.93
   1 -13  -2   -0.17    9.95
  -1  13   1   14.56   14.30
   1 -13  -1   38.42   18.14
  -1  13   0    1.41   12.17
   1 -13   0   -1.49   11.44
  -1  13  -1   15.67   15.54
   1 -13   1   23.35   15.97
  -1  13  -2   -2.73   12.17
   1 -13   2  -11.87   10.80
  -1  13  -3   24.51   14.26
   1 -13   3   40.00   18.57
   1 -13   4   -2.05   10.59
   1 -13   5    5.76   13.11
  -1  13  -6   43.97   18.40
   1 -13   6   33.73   16.09
  -1  13  -7   -2.39   11.01
   1 -13   7    2.39   12.85
  -1  13  -8   19.13   16.05
   1 -13   8   16.27   16.39
  -1  13  -9    4.78   12.55
   1 -13   9   27.32   17.16
  -1  13 -10   13.79   15.28
   1 -13  10   10.12   14.43
   1 -13  11    7.64   14.86
   1 -13  12    0.98   21.73
  -1  12  16   23.91   17.08
   1 -12 -16   35.26   30.95
  -1  12  15  -10.63   13.06
   1 -12 -15    4.61   14.17
  -1  12  14   -1.07   14.60
   1 -12 -14    8.45   12.68
  -1  12  13   -4.57   14.26
   1 -12 -13    8.71   13.70
  -1  12  12    8.67   13.15
   1 -12 -12    0.73   12.98
  -1  12  11   88.50   23.48
   1 -12 -11  102.59   26.13
  -1  12  10   -0.13   13.28
   1 -12 -10   -2.05    9.90
  -1  12   9   81.58   22.03
   1 -12  -9  110.44   24.59
  -1  12   8   -0.26   10.89
   1 -12  -8   -3.12   10.63
  -1  12   7   35.69   16.86
   1 -12  -7   14.64   13.15
  -1  12   6   -5.85    9.39
   1 -12  -6   25.15   15.37
  -1  12   5    1.15   10.16
   1 -12  -5   23.52   13.62
  -1  12   4    0.68    9.61
   1 -12  -4    4.87   10.42
  -1  12   3   19.00   12.47
   1 -12  -3   21.18   14.13
  -1  12   2   24.68   14.77
   1 -12  -2   53.71   17.16
  -1  12   1   -1.32   10.63
   1 -12  -1   -0.21    8.84
  -1  12   0    4.18   10.72
   1 -12   0    0.81    9.90
  -1  12  -1   37.61   14.47
   1 -12   1   25.62   13.06
  -1  12  -2   -2.09    9.61
   1 -12   2    6.57   12.17
  -1  12  -3   57.51   16.09
   1 -12   3   81.37   20.32
  -1  12  -4   24.25   14.00
   1 -12   4   41.62   17.16
  -1  12  -5  188.40   30.14
   1 -12   5  160.14   28.30
  -1  12  -6   -6.92   10.59
   1 -12   6    0.77   12.04
  -1  12  -7   27.54   16.18
   1 -12   7   29.12   16.05
  -1  12  -8   14.05   14.90
   1 -12   8   17.55   14.52
  -1  12  -9    1.84   13.36
   1 -12   9    7.68   13.70
  -1  12 -10    5.29   13.70
   1 -12  10   -0.34   12.00
  -1  12 -11   -0.04   13.15
   1 -12  11    5.76   14.56
   1 -12  12    6.36   14.56
   1 -12  13   -5.89   12.30
  -1  11  18    0.04   12.89
  -1  11  17   25.49   16.91
   1 -11 -17   19.47   16.35
  -1  11  16    2.95   14.34
   1 -11 -16    2.86   13.41
  -1  11  15   16.61   16.35
   1 -11 -15   16.44   15.54
  -1  11  14   24.16   16.48
   1 -11 -14   20.75   17.20
  -1  11  13    8.20   11.87
   1 -11 -13   13.41   13.19
  -1  11  12   74.54   21.73
   1 -11 -12   61.86   20.83
  -1  11  11   10.33   14.43
   1 -11 -11    7.04   11.23
  -1  11  10   29.03   16.61
   1 -11 -10   47.82   16.95
  -1  11   9   23.35   14.09
   1 -11  -9   11.36   11.70
  -1  11   8    2.65   10.12
   1 -11  -8    5.89   10.80
  -1  11   7    7.86   10.20
   1 -11  -7   16.27   12.21
  -1  11   6    2.52    9.69
   1 -11  -6    0.98    7.98
   1 -11  -6    0.60    8.32
  -1  11   5   26.85   13.92
   1 -11  -5   27.71   10.29
   1 -11  -5   52.77   16.01
  -1  11   4   46.28   18.31
   1 -11  -4   30.65   15.11
  -1  11   3   49.61   18.19
   1 -11  -3   53.32   17.55
  -1  11   2   32.28   15.41
   1 -11  -2   33.21   15.33
  -1  11   1   35.14   15.84
   1 -11  -1   21.73   13.36
  -1  11   0   10.84   15.24
   1 -11   0    4.23   10.29
  -1  11  -1   -5.17   10.33
   1 -11   1    6.19   11.40
  -1  11  -2   85.60   17.97
   1 -11   2   67.20   18.96
  -1  11  -3   36.12   14.73
   1 -11   3   24.46   14.00
  -1  11  -4  193.31   22.93
  -1  11  -4  210.17   29.88
   1 -11   4  194.42   28.56
  -1  11  -5    9.95   11.06
   1 -11   5   -3.37    9.05
  -1  11  -6  156.42   27.66
   1 -11   6  141.52   24.59
  -1  11  -7   56.99   19.30
   1 -11   7   39.75   16.44
  -1  11  -8    5.81   12.08
   1 -11   8   -3.07    9.05
  -1  11  -9   16.86   14.30
   1 -11   9    7.86   12.04
  -1  11 -10   17.67   14.34
   1 -11  10    9.65   11.14
  -1  11 -11   17.46   15.45
   1 -11  11    6.32   13.15
  -1  11 -12   -0.60   11.14
   1 -11  12    1.54   12.55
  -1  11 -13    2.13   13.87
   1 -11  13    5.85   12.38
   1 -11  14    2.73   13.62
  -1  10  18   10.54   12.21
   1 -10 -18    7.51   16.14
  -1  10  17   -2.65   11.91
   1 -10 -17   -2.13   13.23
  -1  10  16    0.60   12.81
   1 -10 -16    5.72   13.58
  -1  10  15   79.62   22.84
   1 -10 -15   59.73   19.72
  -1  10  14   14.47   14.69
   1 -10 -14    4.10   12.98
  -1  10  13   79.24   22.37
   1 -10 -13   68.65   19.77
  -1  10  12   -1.02    9.31
   1 -10 -12   -1.79    9.69
  -1  10  11   10.08   12.38
   1 -10 -11    1.41   10.54
  -1  10  10   -1.45    8.84
   1 -10 -10   -0.94    9.22
  -1  10   9   35.82   14.43
   1 -10  -9   39.96   14.52
  -1  10   8   55.20   17.50
   1 -10  -8   35.35   15.11
  -1  10   7   19.64   12.00
   1 -10  -7    8.67    6.83
   1 -10  -7    4.31    9.22
  -1  10   6   97.68   20.58
   1 -10  -6   87.52   14.56
   1 -10  -6   63.70   16.48
  -1  10   5   -1.66   10.63
   1 -10  -5   -1.28    5.34
   1 -10  -5    2.09   10.16
  -1  10   4   41.62   15.63
   1 -10  -4   43.03   14.81
  -1  10   3  173.67   24.85
   1 -10  -3  189.64   22.37
  -1  10   2   40.81   13.53
   1 -10  -2   35.18   12.42
  -1  10   1   65.23   16.52
   1 -10  -1   43.55   14.73
  -1  10   0    5.46   10.54
   1 -10   0   13.49    9.43
  -1  10  -1   16.48   12.94
   1 -10   1   15.80   10.42
  -1  10  -2   78.17   16.01
   1 -10   2   87.35   18.57
  -1  10  -3   31.12   11.27
  -1  10  -3   48.58   14.60
   1 -10   3   30.48   12.55
  -1  10  -4   14.09   10.72
  -1  10  -4   15.67   10.84
   1 -10   4    6.57    8.67
  -1  10  -5   64.85   14.52
  -1  10  -5   59.47   17.29
   1 -10   5   61.99   18.23
  -1  10  -6  113.35   22.46
   1 -10   6  143.70   24.25
  -1  10  -7    2.65   10.46
   1 -10   7   -3.03    7.77
  -1  10  -8  115.61   23.69
   1 -10   8  116.89   22.71
  -1  10  -9   29.80   15.63
   1 -10   9   37.74   15.07
  -1  10 -10    4.57    9.99
   1 -10  10    2.43   10.63
  -1  10 -11   -0.13   11.27
   1 -10  11    5.08   11.06
  -1  10 -12    2.48   10.67
   1 -10  12   11.10   12.55
  -1  10 -13    7.43   12.85
   1 -10  13   -0.43   10.84
  -1  10 -14   -7.86    9.39
   1 -10  14   -8.75   11.27
   1 -10  15   12.17   14.73
   1  -9 -19    5.89   17.29
   1  -9 -18    5.29   14.52
  -1   9  17    7.64   12.17
   1  -9 -17    0.81   11.78
  -1   9  16   51.96   18.78
   1  -9 -16   80.65   23.35
  -1   9  15   30.18   14.69
   1  -9 -15   48.07   17.72
  -1   9  14   83.55   22.41
   1  -9 -14   89.57   23.35
  -1   9  13   50.93   18.14
   1  -9 -13   53.37   17.93
  -1   9  12   66.43   18.74
   1  -9 -12   58.66   17.25
  -1   9  11    5.98   10.46
   1  -9 -11    3.33    9.82
  -1   9  10   -9.31    8.84
   1  -9 -10   -1.37    7.56
  -1   9   9   31.21   12.51
   1  -9  -9   23.82   11.61
  -1   9   8   -3.12    7.98
   1  -9  -8    3.20    5.42
   1  -9  -8   -2.13    8.37
  -1   9   7   50.12   14.34
   1  -9  -7   52.55   10.80
   1  -9  -7   45.04   14.43
  -1   9   6   11.31    9.90
   1  -9  -6    4.31    5.51
   1  -9  -6    4.31    7.43
  -1   9   5    8.67   10.89
   1  -9  -5    2.69    5.21
   1  -9  -5   13.62   10.93
  -1   9   4   32.96   11.91
   1  -9  -4   36.97   11.95
  -1   9   3   34.54   12.72
   1  -9  -3   49.44   13.92
  -1   9   2    8.84    7.60
   1  -9  -2   13.87    8.71
  -1   9   1   -0.77    6.87
   1  -9  -1    0.13    7.17
  -1   9   0  152.97   17.72
   1  -9   0  151.43   18.49
  -1   9  -1   18.87    9.18
   1  -9   1   25.06   10.67
  -1   9  -2    4.40    9.35
  -1   9  -2   -5.46    6.36
   1  -9   2    8.92    8.45
  -1   9  -3  177.30   18.10
  -1   9  -3  220.50   21.35
   1  -9   3  186.74   21.73
  -1   9  -4   93.45   15.45
  -1   9  -4   87.09   17.67
   1  -9   4   68.01   15.88
  -1   9  -5    1.92    7.68
  -1   9  -5    6.66    9.78
   1  -9   5   10.33    9.26
  -1   9  -6   12.85    7.86
  -1   9  -6   18.91   11.10
   1  -9   6    5.72    8.67
  -1   9  -7  208.08   24.51
   1  -9   7  219.57   24.08
  -1   9  -8  108.95   21.64
   1  -9   8   87.52   18.27
  -1   9  -9   66.47   19.08
   1  -9   9   52.81   16.48
  -1   9 -10    8.92   10.72
   1  -9  10    2.43    9.78
  -1   9 -11    4.82   10.54
   1  -9  11    6.70   11.10
  -1   9 -12   11.19   11.06
   1  -9  12   12.51   12.51
  -1   9 -13    5.76   10.76
   1  -9  13    4.44   10.42
  -1   9 -14   -2.09    8.88
   1  -9  14   -1.54   10.63
  -1   9 -15    5.85   12.94
   1  -9  15   -4.70   10.37
   1  -9  16    5.59   13.49
   1  -8 -19    9.86   14.64
   1  -8 -18   -5.29   11.57
  -1   8  17    6.45   10.67
   1  -8 -17    0.13   13.49
  -1   8  16   27.19   13.87
   1  -8 -16   30.06   15.07
  -1   8  15   17.12   13.45
   1  -8 -15   22.54   14.56
  -1   8  14   39.32   15.16
   1  -8 -14   48.50   16.61
  -1   8  13   13.49   12.00
   1  -8 -13    1.15    9.82
  -1   8  12   27.58   12.68
   1  -8 -12   45.72   15.41
  -1   8  11   81.37   19.38
   1  -8 -11   60.62   16.31
  -1   8  10  182.55   22.24
   1  -8 -10  190.75   16.05
   1  -8 -10  135.85   21.94
  -1   8   9    2.90    9.01
   1  -8  -9   10.20    5.98
   1  -8  -9   -1.75    6.49
  -1   8   8  254.83   24.46
   1  -8  -8  267.08   17.85
   1  -8  -8  242.28   23.31
  -1   8   7    2.05    6.79
   1  -8  -7    3.50    5.46
   1  -8  -7    4.82    7.17
  -1   8   6    6.83    7.39
   1  -8  -6    7.09    5.46
   1  -8  -6    1.07    6.02
  -1   8   5    8.58    8.03
   1  -8  -5   13.96    6.45
   1  -8  -5    4.65    6.75
  -1   8   4   11.70    8.79
   1  -8  -4   11.61    6.32
   1  -8  -4   18.31    9.18
  -1   8   3   46.41   12.38
   1  -8  -3   33.81   10.84
  -1   8   2   87.99   16.22
   1  -8  -2   63.18   13.53
  -1   8   1  291.67   22.29
   1  -8  -1  279.16   22.88
  -1   8   0   51.57   11.87
   1  -8   0   73.47   14.56
  -1   8  -1   79.28   14.56
   1  -8   1   92.64   16.39
  -1   8  -2   60.75   12.55
  -1   8  -2   63.01   13.36
   1  -8   2   51.27   12.68
  -1   8  -3   46.41   11.10
  -1   8  -3   46.83   12.68
   1  -8   3   36.42   11.27
  -1   8  -4  152.15   15.54
  -1   8  -4  182.04   19.34
   1  -8   4  140.41   20.02
  -1   8  -5  289.32   19.89
  -1   8  -5  280.44   24.68
   1  -8   5  289.32   24.55
  -1   8  -6   14.98    7.17
  -1   8  -6   14.47    9.35
   1  -8   6   18.36    9.82
  -1   8  -7  174.01   21.30
   1  -8   7  136.15   21.69
  -1   8  -8   45.13   14.90
   1  -8   8   26.26   11.06
  -1   8  -9  158.73   25.66
   1  -8   9  141.87   22.54
  -1   8 -10    1.49    7.98
   1  -8  10    4.78    8.37
  -1   8 -11    6.83    9.95
   1  -8  11   10.03   10.76
  -1   8 -12   13.41   11.65
   1  -8  12   30.31   14.17
  -1   8 -13    8.50   11.53
   1  -8  13    9.09   10.54
  -1   8 -14    4.14   11.83
   1  -8  14    9.43   11.48
  -1   8 -15   -1.92    9.52
   1  -8  15   -2.05    9.35
  -1   8 -16    7.30   11.65
   1  -8  16    9.95   13.32
   1  -8  17    3.03   12.76
   1  -7 -20    7.30   13.53
   1  -7 -19   -1.45   11.57
   1  -7 -18   -3.84    9.73
   1  -7 -17    8.37   11.65
  -1   7  16   14.56   10.84
   1  -7 -16    0.73   11.19
  -1   7  15   24.08   12.17
   1  -7 -15   29.88   14.39
  -1   7  14   23.57   11.83
   1  -7 -14   15.45   11.23
  -1   7  13   51.40   15.71
   1  -7 -13   61.73   16.56
  -1   7  12   73.30   18.74
   1  -7 -12   75.74   18.14
  -1   7  11  158.81   23.31
   1  -7 -11  137.77   14.47
   1  -7 -11  154.76   23.61
  -1   7  10  343.16   27.02
   1  -7 -10  362.11   20.88
   1  -7 -10  318.57   26.55
  -1   7   9   94.73   18.02
   1  -7  -9  109.21   12.59
   1  -7  -9   95.37   17.42
  -1   7   8   -1.84    5.93
   1  -7  -8    1.28    4.70
   1  -7  -8   -0.13    6.02
  -1   7   7  176.32   19.72
   1  -7  -7  176.23   14.09
   1  -7  -7  160.56   18.06
  -1   7   6    1.58    5.68
   1  -7  -6   -0.51    3.97
   1  -7  -6   -1.02    5.38
  -1   7   5   52.13   12.51
   1  -7  -5   60.71   10.20
   1  -7  -5   31.89    9.90
  -1   7   4   -0.26    4.99
   1  -7  -4    4.44    4.99
   1  -7  -4    2.56    6.40
  -1   7   3   45.89   11.78
   1  -7  -3   48.58   11.87
  -1   7   2    1.11    5.76
   1  -7  -2   -0.55    4.87
  -1   7   1   16.91    7.60
   1  -7  -1   17.93    7.81
  -1   7   0  413.13   23.10
   1  -7   0  468.33   26.60
  -1   7  -1  345.89   21.05
  -1   7  -1  382.05   22.75
   1  -7   1  348.28   23.05
  -1   7  -2  131.11   13.66
  -1   7  -2  170.60   16.27
   1  -7   2  138.49   16.44
  -1   7  -3  536.77   24.21
  -1   7  -3  587.44   29.54
   1  -7   3  590.65   30.57
  -1   7  -4  404.76   21.05
  -1   7  -4  426.24   26.43
   1  -7   4  405.36   26.13
  -1   7  -5   12.85    6.02
  -1   7  -5    3.54    6.49
   1  -7   5    5.64    7.30
  -1   7  -6   94.73   10.72
  -1   7  -6  126.24   20.41
   1  -7   6   79.71   15.07
  -1   7  -7   71.17   10.25
  -1   7  -7   92.64   18.57
   1  -7   7   68.52   14.64
  -1   7  -8  149.81   23.69
   1  -7   8  133.24   20.02
  -1   7  -9   46.62   14.47
   1  -7   9   67.24   15.75
  -1   7 -10  111.00   22.07
   1  -7  10  106.77   19.25
  -1   7 -11   74.33   18.78
   1  -7  11   48.11   14.81
  -1   7 -12    6.87   10.20
   1  -7  12   37.74   14.56
  -1   7 -13   -2.05    8.32
   1  -7  13   -6.02    8.11
  -1   7 -14    2.09    9.90
   1  -7  14    6.70   10.50
  -1   7 -15   35.31   17.29
   1  -7  15   27.45   14.00
  -1   7 -16   -6.62   10.63
   1  -7  16   18.31   13.19
  -1   7 -17   -3.50   10.76
   1  -7  17   12.81   12.12
   1  -7  18    7.21   13.23
   1  -6 -20    0.17   12.68
   1  -6 -19   15.28   13.32
   1  -6 -18   -0.68   11.31
   1  -6 -17   -1.15   10.33
  -1   6  16   49.74   15.20
   1  -6 -16   22.24   14.73
  -1   6  15   47.94   14.56
   1  -6 -15   30.48   12.89
  -1   6  14   45.77   13.75
   1  -6 -14   30.52   13.87
  -1   6  13  224.86   23.99
   1  -6 -13  209.15   19.21
   1  -6 -13  199.71   24.29
  -1   6  12    1.07    7.04
   1  -6 -12   11.83    7.17
   1  -6 -12   -0.38    7.90
  -1   6  11  332.53   25.79
   1  -6 -11  320.19   20.53
   1  -6 -11  318.35   26.94
  -1   6  10  147.46   21.64
   1  -6 -10  141.10   13.75
   1  -6 -10  159.20   22.29
  -1   6   9   21.90    9.31
   1  -6  -9   32.10    8.28
   1  -6  -9   26.68    9.73
  -1   6   8   78.60   15.33
   1  -6  -8   64.51   10.42
   1  -6  -8   41.62   11.31
  -1   6   7  132.77   15.50
   1  -6  -7  107.58   11.23
   1  -6  -7   98.70   15.45
  -1   6   6   34.84   10.16
   1  -6  -6   50.72    9.18
   1  -6  -6   42.39   11.06
  -1   6   5  230.71   18.74
   1  -6  -5  279.55   15.92
   1  -6  -5  201.72   18.06
  -1   6   4  129.49   15.11
   1  -6  -4  154.80   12.55
   1  -6  -4  122.31   14.47
  -1   6   3   40.51   10.42
   1  -6  -3   28.99    9.09
  -1   6   2   34.71    9.09
   1  -6  -2   28.22    8.41
  -1   6   1   14.26    7.17
   1  -6  -1   18.49    7.60
  -1   6   0   12.17    6.70
   1  -6   0    9.26    6.36
  -1   6  -1  326.08   19.00
  -1   6  -1  367.41   20.49
   1  -6   1  375.99   22.41
  -1   6  -2  224.60   16.52
  -1   6  -2  271.05   18.53
   1  -6   2  267.64   19.81
  -1   6  -3 1209.21   32.66
  -1   6  -3 1246.52   39.79
   1  -6   3 1212.80   39.83
  -1   6  -4   73.81   10.42
  -1   6  -4   76.29   13.41
   1  -6   4   68.22   12.89
  -1   6  -5   15.71    5.59
  -1   6  -5    9.78    6.70
   1  -6   5   10.08    7.26
  -1   6  -6  115.57   10.29
  -1   6  -6  107.71   17.03
   1  -6   6  140.93   16.05
  -1   6  -7   11.78    4.53
  -1   6  -7   11.06    7.51
   1  -6   7    8.79    7.13
  -1   6  -8  136.36   20.58
   1  -6   8  144.73   20.41
  -1   6  -9   83.25   18.14
   1  -6   9   79.49   16.27
  -1   6 -10  182.89   22.80
   1  -6  10  148.82   21.90
  -1   6 -11    0.04    7.81
   1  -6  11    0.38    8.07
  -1   6 -12   14.26   10.84
   1  -6  12   54.01   15.50
  -1   6 -13    1.58    9.52
   1  -6  13   -0.55    8.97
  -1   6 -14   10.63   10.63
   1  -6  14    0.51    9.43
  -1   6 -15    1.11    9.78
   1  -6  15    2.18    8.88
  -1   6 -16    0.68    9.65
   1  -6  16    7.68   10.67
  -1   6 -17   -3.20   10.54
   1  -6  17    3.46   11.06
  -1   6 -18    2.82   11.10
   1  -6  18    0.09   11.57
   1  -6  19   34.20   19.25
   1  -5 -21   -1.71   12.30
   1  -5 -20   15.54   14.05
   1  -5 -19   12.51   12.59
   1  -5 -18    1.15   11.19
   1  -5 -17   19.38   12.94
   1  -5 -16   15.24   12.38
  -1   5  15   64.29   15.50
   1  -5 -15   38.00   15.03
  -1   5  14   97.89   18.27
   1  -5 -14   96.95   16.95
   1  -5 -14   73.69   17.33
  -1   5  13   43.29   12.72
   1  -5 -13   53.07   12.55
   1  -5 -13   34.92   13.32
  -1   5  12  168.08   19.85
   1  -5 -12  203.60   18.49
   1  -5 -12  176.96   21.35
  -1   5  11   13.32    9.56
   1  -5 -11   19.89    7.81
   1  -5 -11   22.46    9.90
  -1   5  10    9.01    7.30
   1  -5 -10   19.94    7.47
   1  -5 -10   17.38    9.18
  -1   5   9  184.86   17.93
   1  -5  -9  183.36   14.60
   1  -5  -9  145.49   16.61
  -1   5   8   77.23   14.26
   1  -5  -8   67.62   10.50
   1  -5  -8   79.49   14.64
  -1   5   7  453.09   24.93
   1  -5  -7  524.22   21.43
   1  -5  -7  455.44   25.36
  -1   5   6  380.34   22.80
   1  -5  -6  393.58   17.85
   1  -5  -6  354.73   21.99
  -1   5   5  156.68   15.33
   1  -5  -5  151.73   11.65
   1  -5  -5  158.73   14.94
  -1   5   4  488.57   25.02
   1  -5  -4  484.09   19.21
   1  -5  -4  414.24   22.46
  -1   5   3   29.76    8.28
   1  -5  -3   29.07    6.49
   1  -5  -3   31.55    8.20
  -1   5   2  225.88   15.75
   1  -5  -2  239.50   16.99
  -1   5   1   97.12   10.72
   1  -5  -1  115.10   12.21
  -1   5   0  778.36   26.43
   1  -5   0  810.13   28.69
  -1   5  -1  197.28   13.83
  -1   5  -1  211.88   15.16
  -1   5  -2 1736.67   37.31
  -1   5  -2 1895.40   43.67
   1  -5   2 1766.81   42.95
  -1   5  -3  328.73   16.91
  -1   5  -3  358.53   20.79
   1  -5   3  342.52   20.79
  -1   5  -4 1047.66   26.13
  -1   5  -4 1138.77   37.23
   1  -5   4 1197.26   37.78
  -1   5  -5  488.06   17.16
  -1   5  -5  571.86   28.22
   1  -5   5  500.05   25.53
  -1   5  -6    4.40    3.33
  -1   5  -6    0.26    5.42
   1  -5   6    5.04    6.10
  -1   5  -7  121.67    7.77
  -1   5  -7  141.57   16.74
   1  -5   7  101.65   15.37
  -1   5  -8   14.17    2.90
  -1   5  -8    9.39    7.68
   1  -5   8   10.08    7.60
  -1   5  -9   50.63   13.28
   1  -5   9   37.74   11.27
  -1   5 -10    6.15    7.04
   1  -5  10   -4.27    4.57
  -1   5 -11   -1.02    6.53
   1  -5  11   -6.02    5.76
  -1   5 -12   75.48   17.85
   1  -5  12   87.22   17.93
  -1   5 -13    2.95    9.69
   1  -5  13    3.80    8.37
  -1   5 -14   39.45   14.77
   1  -5  14   24.63   11.83
  -1   5 -15   -1.20    9.43
   1  -5  15   -5.38    8.41
  -1   5 -16   -3.42    8.41
   1  -5  16   -0.21    9.73
  -1   5 -17   -2.01   10.89
   1  -5  17   -1.24   10.08
  -1   5 -18   -8.20    7.81
   1  -5  18   -6.87   10.29
  -1   5 -19   -0.21   10.89
   1  -5  19   -3.46   11.06
   1  -4 -21   17.16   15.11
   1  -4 -20    4.78   12.81
   1  -4 -19   -3.80   10.37
   1  -4 -18  -10.72    7.04
   1  -4 -17   66.43   19.04
   1  -4 -16   39.45   15.63
   1  -4 -16   36.25   14.13
  -1   4  15  218.46   22.20
   1  -4 -15  215.85   21.73
   1  -4 -15  226.65   24.97
  -1   4  14   24.89   10.03
   1  -4 -14   19.85   10.33
   1  -4 -14   24.55   11.01
  -1   4  13  200.78   19.55
   1  -4 -13  182.08   18.36
   1  -4 -13  192.16   22.24
  -1   4  12   12.25    7.73
   1  -4 -12   15.97    8.11
   1  -4 -12   20.19    9.99
  -1   4  11    9.48    7.00
   1  -4 -11   -1.37    5.17
   1  -4 -11   -4.65    5.34
  -1   4  10  157.88   16.44
   1  -4 -10  150.49   14.39
   1  -4 -10  145.71   17.33
  -1   4   9  191.43   17.03
   1  -4  -9  199.20   15.37
   1  -4  -9  184.09   17.93
  -1   4   8  121.54   13.36
   1  -4  -8  116.51   11.65
   1  -4  -8  109.68   13.45
  -1   4   7   79.24   12.72
   1  -4  -7   75.99    9.43
   1  -4  -7   67.67   11.65
  -1   4   6    4.95    5.89
   1  -4  -6   -0.34    3.16
   1  -4  -6   -0.47    3.93
  -1   4   5  409.76   21.26
   1  -4  -5  320.62   15.41
   1  -4  -5  366.30   19.89
  -1   4   4  972.35   30.57
   1  -4  -4  971.25   25.02
   1  -4  -4  910.88   29.67
  -1   4   3   34.41    7.94
   1  -4  -3   35.18    6.79
   1  -4  -3   36.29    7.98
  -1   4   2  118.85   10.97
   1  -4  -2  116.93   11.74
  -1   4   1  138.66   11.65
   1  -4  -1  149.85   12.68
  -1   4   0  116.34   10.29
   1  -4   0  115.35   11.06
  -1   4  -1   82.69    8.62
  -1   4  -1  102.42    9.90
   1  -4   1   83.98   10.03
  -1   4  -2  184.81   11.19
  -1   4  -2  207.06   14.00
   1  -4   2  209.06   14.94
  -1   4  -3  457.45   16.09
  -1   4  -3  520.20   22.58
   1  -4   3  395.33   19.85
  -1   4  -4  774.90   19.85
  -1   4  -4  751.04   28.30
  -1   4  -5    5.93    3.33
  -1   4  -5    7.30    5.89
   1  -4   5    0.51    5.04
  -1   4  -6 2609.55   29.24
  -1   4  -6 2747.79   59.17
   1  -4   6 2477.25   54.18
  -1   4  -7    0.26    1.62
  -1   4  -7   -1.15    1.58
  -1   4  -7    0.94    5.42
   1  -4   7    2.90    5.51
  -1   4  -8  133.11   16.14
  -1   4  -8  150.70   16.35
   1  -4   8  137.26   15.33
  -1   4  -9  125.69   18.87
  -1   4  -9  132.69   16.01
   1  -4   9  101.14   16.05
  -1   4 -10    5.34    7.68
  -1   4 -10    0.85    6.79
   1  -4  10    0.90    7.04
  -1   4 -11   -5.12    6.15
  -1   4 -11    6.32    8.07
   1  -4  11    3.97    6.92
  -1   4 -12   15.58    9.48
  -1   4 -12   20.24   10.63
   1  -4  12   22.03   10.93
  -1   4 -13  111.21   21.77
  -1   4 -13  109.21   19.77
   1  -4  13   79.54   16.74
  -1   4 -14  103.91   21.86
  -1   4 -14   93.50   19.25
   1  -4  14   77.78   17.46
  -1   4 -15    3.24    9.14
  -1   4 -15    2.95    9.99
   1  -4  15    3.76    9.56
  -1   4 -16    0.94   10.67
  -1   4 -16    0.17   10.54
   1  -4  16    1.49    8.79
  -1   4 -17   10.33   11.14
  -1   4 -17   -0.51   10.46
   1  -4  17    4.18   10.25
  -1   4 -18    4.57   10.20
  -1   4 -18    0.77   11.36
   1  -4  18   -2.48   10.29
  -1   4 -19   -6.40   10.84
  -1   4 -19   -3.07   10.54
   1  -4  19    0.47   12.12
  -1   4 -20   -0.77   13.45
  -1   4 -20    1.28   14.94
   1  -4  20    0.21   13.23
   1  -3 -21    7.13   14.13
   1  -3 -20   -6.92    9.95
   1  -3 -19    0.77   10.76
   1  -3 -18   50.59   18.02
   1  -3 -17    0.98    9.09
   1  -3 -17   -0.17    9.78
   1  -3 -16  104.21   19.51
   1  -3 -16   85.90   18.74
   1  -3 -15   -3.80    6.53
   1  -3 -15    3.76    9.26
  -1   3  14  140.59   16.74
   1  -3 -14  153.09   21.64
   1  -3 -14  106.77   19.13
  -1   3  13   17.76    8.62
   1  -3 -13    7.73    8.45
   1  -3 -13    4.70    7.64
  -1   3  12   92.60   14.98
   1  -3 -12   85.30   14.98
   1  -3 -12   89.14   17.03
  -1   3  11  152.84   15.28
   1  -3 -11  169.15   16.35
   1  -3 -11  194.72   19.64
  -1   3  10    4.10    5.38
   1  -3 -10    6.66    5.98
   1  -3 -10    6.66    6.02
  -1   3   9  364.93   20.96
   1  -3  -9  377.65   20.53
   1  -3  -9  385.00   23.57
  -1   3   8   42.73    9.56
   1  -3  -8   41.41    8.67
   1  -3  -8   37.10    9.61
  -1   3   7   15.54    6.53
   1  -3  -7   20.41    6.45
   1  -3  -7    8.54    6.19
  -1   3   6  553.37   23.01
   1  -3  -6  558.50   20.24
   1  -3  -6  571.73   24.16
  -1   3   5  216.62   14.86
   1  -3  -5  254.66   13.49
   1  -3  -5  201.63   14.22
  -1   3   4  142.21   11.61
   1  -3  -4  164.15   10.46
   1  -3  -4  142.16   12.04
  -1   3   3   -0.43    3.37
   1  -3  -3    2.99    3.63
   1  -3  -3    1.28    3.59
  -1   3   2   32.53    6.75
   1  -3  -2   24.51    5.59
   1  -3  -2   28.90    6.57
  -1   3   1  213.25   12.12
  -1   3   0   15.88    4.65
   1  -3   0   14.81    5.17
  -1   3  -1  149.21    9.39
  -1   3  -1  174.87   11.57
   1  -3   1  155.95   11.65
  -1   3  -2   -2.31    2.31
  -1   3  -2   -0.43    3.93
   1  -3   2    0.94    4.53
  -1   3  -3  755.35   17.12
  -1   3  -3  767.09   24.89
   1  -3   3  668.52   23.01
  -1   3  -4  570.28   13.70
  -1   3  -4  587.40   23.44
   1  -3   4  515.64   21.43
  -1   3  -5 3151.06   27.54
  -1   3  -5 3143.16   56.01
   1  -3   5 3023.71   26.90
   1  -3   5 3357.99   56.18
  -1   3  -6   27.75    3.24
  -1   3  -6   42.22    3.03
  -1   3  -6   42.82    9.86
  -1   3  -6   40.56    9.35
   1  -3   6   47.64    3.24
   1  -3   6   45.81    9.73
  -1   3  -7  873.10   33.30
  -1   3  -7  877.75   32.23
   1  -3   7 1000.96   34.45
  -1   3  -8    4.10    6.10
  -1   3  -8    3.84    5.25
   1  -3   8    4.99    5.51
  -1   3  -9   31.25   10.54
  -1   3  -9   34.67   10.33
   1  -3   9   40.47   10.80
  -1   3 -10   55.63   13.06
  -1   3 -10   67.07   13.92
   1  -3  10   52.60   12.42
  -1   3 -11  306.57   24.59
  -1   3 -11  324.59   25.15
   1  -3  11  325.83   25.10
  -1   3 -12   30.99   12.51
  -1   3 -12   44.95   12.34
   1  -3  12   30.87   11.27
  -1   3 -13   -2.82    7.13
  -1   3 -13   -6.02    6.53
   1  -3  13    7.39    8.54
  -1   3 -14   -1.49    7.60
  -1   3 -14   -0.21    9.26
   1  -3  14    5.25    9.35
  -1   3 -15   16.09   11.95
  -1   3 -15   34.15   14.22
   1  -3  15   26.21   12.47
  -1   3 -16   17.33   12.25
  -1   3 -16   -3.80    9.26
   1  -3  16    7.56   10.67
  -1   3 -17   -1.54    8.20
  -1   3 -17   -1.96    9.35
   1  -3  17   -2.05    7.86
  -1   3 -18   -2.26    9.86
  -1   3 -18  -11.65    9.99
   1  -3  18    7.34   11.74
  -1   3 -19    4.48   11.19
  -1   3 -19    0.90   11.57
   1  -3  19    8.11   12.64
  -1   3 -20   -5.68    8.62
  -1   3 -20   25.23   15.71
   1  -3  20   -1.96   11.06
   1  -3  21    8.88   13.70
   1  -2 -20    5.93   12.21
   1  -2 -19   28.48   14.43
   1  -2 -18    1.24   10.03
   1  -2 -18   -4.06    9.35
   1  -2 -17   63.48   17.67
   1  -2 -17   58.66   16.65
   1  -2 -16    3.63    9.26
   1  -2 -16   10.84    9.86
   1  -2 -15   40.56   13.87
   1  -2 -15   28.69   11.74
   1  -2 -14  127.82   20.66
   1  -2 -14  122.36   20.11
  -1   2  13   28.65    9.14
   1  -2 -13   42.91   13.15
   1  -2 -13   38.81   12.55
  -1   2  12  387.60   22.11
   1  -2 -12  360.88   25.19
   1  -2 -12  325.40   24.89
  -1   2  11   36.16    9.05
   1  -2 -11   30.10    9.52
   1  -2 -11   40.09   11.57
  -1   2  10  473.63   22.71
   1  -2 -10  397.89   22.75
   1  -2 -10  394.05   24.42
  -1   2   9   43.50    9.05
   1  -2  -9   20.36    7.34
   1  -2  -9   32.74    9.43
  -1   2   8    4.48    4.35
   1  -2  -8    6.32    5.72
   1  -2  -8    0.47    3.84
  -1   2   7  364.97   18.87
   1  -2  -7  417.32   19.64
   1  -2  -7  399.26   20.58
  -1   2   6  290.78   15.58
   1  -2  -6  312.04   15.67
   1  -2  -6  295.73   16.86
  -1   2   5   35.73    7.30
   1  -2  -5   39.70    7.00
   1  -2  -5   28.60    6.79
  -1   2   4  495.66   18.40
   1  -2  -4  494.50   16.65
   1  -2  -4  528.66   19.13
  -1   2   3 2576.55   38.98
   1  -2  -3 2424.91   33.34
   1  -2  -3 2262.55   35.82
  -1   2   2   41.03    6.62
   1  -2  -2   62.29    6.62
   1  -2  -2   51.32    7.00
  -1   2   1 8382.55   62.33
   1  -2  -1 8652.02   62.67
  -1   2   0 1048.26   20.92
   1  -2   0 1112.39   22.71
  -1   2  -1   13.32    3.63
  -1   2  -1   11.14    4.10
   1  -2   1    7.43    4.01
  -1   2  -2  187.42    7.98
  -1   2  -2  176.23   10.67
   1  -2   2  172.90   11.06
  -1   2  -3 1188.46   16.65
  -1   2  -3 1144.23   27.19
   1  -2   3 1107.77   15.97
   1  -2   3 1046.68   25.79
  -1   2  -4  143.40    5.25
  -1   2  -4  159.33   11.78
  -1   2  -4  166.46   12.51
   1  -2   4  168.76    5.64
   1  -2   4  161.63   12.34
  -1   2  -5   81.46   11.57
  -1   2  -5   68.35   10.25
   1  -2   5   72.58   10.50
  -1   2  -6  868.19   29.24
  -1   2  -6  875.02   29.24
   1  -2   6  847.27   28.90
  -1   2  -7  650.50   27.32
  -1   2  -7  661.26   26.90
  -1   2  -8   39.66    9.26
  -1   2  -8   66.73   12.21
  -1   2  -9   55.03   11.65
  -1   2  -9   75.39   13.36
  -1   2 -10    3.07    5.76
  -1   2 -10    0.98    5.42
  -1   2 -11    2.60    6.10
  -1   2 -11    2.35    6.32
  -1   2 -12   28.30   11.53
  -1   2 -12   30.06   10.63
  -1   2 -13    8.75    8.71
  -1   2 -13    8.37    8.45
  -1   2 -14   21.69   11.74
  -1   2 -14   16.86    9.73
  -1   2 -15   51.40   15.03
  -1   2 -15   59.26   16.69
  -1   2 -16   25.44   12.25
  -1   2 -16   39.70   14.34
  -1   2 -17   49.91   16.95
  -1   2 -17   41.16   15.92
  -1   2 -18   19.85   14.09
  -1   2 -18   34.28   15.84
   1  -2  18   13.41   12.98
  -1   2 -19   -3.29    8.20
  -1   2 -19    5.29   12.21
   1  -2  19    3.84   10.80
  -1   2 -20   12.89   13.75
  -1   2 -20   10.08   14.34
   1  -2  20    6.75   13.58
  -1   2 -21    1.62   11.61
  -1   2 -21    2.95   13.70
   1  -2  21   -0.13   11.31
   1  -1 -20    6.53   14.64
   1  -1 -19   -0.85   10.63
   1  -1 -19    2.65   11.57
   1  -1 -18   61.01   18.02
   1  -1 -18   59.56   17.33
   1  -1 -17   33.51   14.64
   1  -1 -17   25.70   12.89
   1  -1 -16   -0.34    8.67
   1  -1 -16   -3.76    7.94
   1  -1 -15   59.04   16.48
   1  -1 -15   69.33   15.80
   1  -1 -14   68.05   16.95
   1  -1 -14   63.06   15.50
  -1   1  13  197.19   18.27
   1  -1 -13  186.48   21.18
   1  -1 -13  189.30   20.71
  -1   1  12    2.13    4.57
   1  -1 -12   -7.17    6.19
   1  -1 -12    6.02    7.04
  -1   1  11  434.78   20.88
   1  -1 -11  422.61   25.19
   1  -1 -11  463.72   27.15
  -1   1  10   23.91    6.66
   1  -1 -10   17.55    7.98
   1  -1 -10   16.44    7.04
  -1   1   9  310.58   16.65
   1  -1  -9  337.57   20.53
   1  -1  -9  355.50   20.96
  -1   1   8  346.49   16.78
   1  -1  -8  342.99   19.55
   1  -1  -8  338.98   19.51
  -1   1   7   12.89    5.34
   1  -1  -7   18.49    7.81
   1  -1  -7   16.56    6.23
  -1   1   6    3.76    3.80
   1  -1  -6    1.41    4.10
   1  -1  -6    3.07    4.01
  -1   1   5   28.95    5.89
   1  -1  -5   37.44    7.17
   1  -1  -5   27.75    5.85
  -1   1   4  155.27   10.03
   1  -1  -4  154.93   10.16
   1  -1  -4  167.87   10.67
  -1   1   3  548.25   16.48
  -1   1   2  938.67   19.72
   1  -1  -2  905.67   18.27
   1  -1  -2  874.16   17.63
  -1   1   1  174.18    8.24
   1  -1  -1  128.72    7.13
   1  -1  -1  153.39    7.43
  -1   1   0  784.13   14.98
   1  -1   0  804.58   15.33
  -1   1  -1 2320.66   22.80
  -1   1  -1 2304.52   27.58
   1  -1   1 2276.17   22.41
   1  -1   1 2285.39   27.37
  -1   1  -2    1.24    1.62
  -1   1  -2    0.13    2.69
  -1   1  -2   -0.38    3.12
   1  -1   2    2.05    1.45
   1  -1   2    0.26    2.99
  -1   1  -3 4026.97   20.36
  -1   1  -3 4110.74   44.83
  -1   1  -3 4210.72   45.94
   1  -1   3 4387.59   21.18
   1  -1   3 4155.22   45.55
  -1   1  -4   28.22    6.02
  -1   1  -4   24.68    5.93
  -1   1  -5 1011.59   26.94
  -1   1  -5 1040.36   28.05
  -1   1  -6  722.05   24.89
  -1   1  -6  678.55   24.80
  -1   1  -7  231.22   15.88
  -1   1  -7  238.90   16.22
  -1   1  -8  682.35   27.49
  -1   1  -8  653.70   27.54
  -1   1  -9  762.05   30.91
  -1   1  -9  764.53   31.46
  -1   1 -10    4.53    5.21
  -1   1 -10    2.56    5.85
  -1   1 -11   69.84   13.58
  -1   1 -11   61.60   13.49
  -1   1 -12    1.58    5.72
  -1   1 -12   -2.39    6.28
  -1   1 -13  140.84   21.00
  -1   1 -13   88.46   16.61
  -1   1 -14    3.29    7.98
  -1   1 -14    2.05    6.87
  -1   1 -15    9.48    9.61
  -1   1 -15   12.98    9.65
  -1   1 -16  128.03   22.33
  -1   1 -16  115.82   21.43
  -1   1 -17   -4.48    8.20
  -1   1 -17   -1.28   10.20
  -1   1 -18   18.02   11.53
  -1   1 -18   22.11   12.85
  -1   1 -19   -6.75    8.67
  -1   1 -19    1.54   12.17
  -1   1 -20    3.67   11.48
  -1   1 -20   -1.62   12.76
  -1   1 -21   10.03   15.33
  -1   1 -21    0.21   14.05
   1  -1  21   -1.58   12.72
   1   0 -20    2.35   12.04
   1   0 -19   12.89   13.06
   1   0 -19   12.55   12.72
   1   0 -18    2.52   10.20
   1   0 -18    9.61   11.31
   1   0 -17   -2.95    7.90
   1   0 -17   -7.98    7.73
   1   0 -16   53.37   15.28
   1   0 -16   61.39   16.27
   1   0 -15   99.26   20.11
   1   0 -15   95.97   18.44
   1   0 -14  141.78   23.86
   1   0 -14  110.91   18.49
   1   0 -13  139.18   21.64
   1   0 -13  151.73   18.78
  -1   0  12   72.49   10.46
   1   0 -12   67.97   14.73
   1   0 -12   69.50   13.96
  -1   0  11   78.21    9.61
   1   0 -11   91.92   16.52
   1   0 -11   71.04   13.53
  -1   0  10  149.00   11.70
   1   0 -10  158.64   16.65
   1   0 -10  189.30   16.95
  -1   0   9  244.03   13.62
   1   0  -9  223.19   18.06
   1   0  -9  258.76   18.14
  -1   0   8   30.70    6.28
   1   0  -8   39.53    9.39
   1   0  -8   22.03    6.96
  -1   0   7   25.91    5.72
   1   0  -7   36.03    9.39
   1   0  -7   21.86    6.57
  -1   0   6   48.20    7.00
   1   0  -6   57.29    9.86
   1   0  -6   45.64    7.90
  -1   0   5  758.64   19.21
   1   0  -5  723.25   22.97
   1   0  -5  735.58   21.30
  -1   0   4   12.81    3.88
   1   0  -4   20.49    5.89
   1   0  -4    6.19    3.71
  -1   0   3 2246.84   28.43
   1   0  -3 2012.25   30.65
   1   0  -3 2127.22   27.24
  -1   0   2   49.99    5.12
  -1   0   2   59.77    4.57
   1   0  -2   58.06    6.02
   1   0  -2   57.29    4.70
  -1   0   1   28.95    3.59
  -1   0   1   34.03    3.97
  -1   0   1   31.42    2.73
   1   0  -1   23.91    3.54
   1   0  -1   29.07    2.77
  -1   0   0 2917.41   24.12
  -1   0   0   -0.04    0.47
  -1   0   0 2631.88   17.89
   1   0   0 2832.83   23.82
   1   0   0 2725.29   18.27
  -1   0  -1  724.91   10.80
  -1   0  -1  726.66   12.17
   1   0   1  715.95   10.67
   1   0   1  732.55   12.17
  -1   0  -2 1343.26   13.23
  -1   0  -2 1397.18   19.13
  -1   0  -2 1399.79   20.96
   1   0   2 1213.44   12.59
   1   0   2 1375.50   13.36
  -1   0  -3 1177.92   12.00
  -1   0  -3 1300.40   21.52
  -1   0  -3 1331.22   24.04
   1   0   3 1188.21   12.08
   1   0   3 1235.08   12.30
  -1   0  -4  198.01    5.55
  -1   0  -4  183.23   10.03
  -1   0  -4  183.15   11.40
   1   0   4  165.86    5.12
  -1   0  -5  117.74    4.91
  -1   0  -5  125.86    9.61
  -1   0  -5  126.50   10.93
   1   0   5  117.70    4.74
  -1   0  -6 1190.77   15.54
  -1   0  -6 1141.89   28.35
  -1   0  -6 1139.11   30.57
   1   0   6 1150.72   15.33
  -1   0  -7  314.77    9.05
  -1   0  -7  366.00   17.97
  -1   0  -7  360.75   19.17
   1   0   7  346.28    9.43
  -1   0  -8 1121.22   23.48
  -1   0  -8 1201.01   33.94
  -1   0  -8 1177.87   35.90
   1   0   8 1269.41   19.17
  -1   0  -9   75.18   12.55
  -1   0  -9   70.70   12.47
   1   0   9   51.40    4.95
  -1   0 -10   12.30    6.96
  -1   0 -10   18.66    8.41
   1   0  10   14.69    3.46
  -1   0 -11   -3.50    4.31
  -1   0 -11   11.53    8.07
   1   0  11    2.95    2.65
  -1   0 -12   44.61   12.08
  -1   0 -12   44.83   11.87
  -1   0 -13    4.74    7.26
  -1   0 -13    1.75    7.21
  -1   0 -14   -1.58    5.64
  -1   0 -14    4.78    7.64
  -1   0 -15   21.05   10.80
  -1   0 -15   28.26   12.38
  -1   0 -16    7.17    8.79
  -1   0 -16    8.75    9.82
  -1   0 -17   63.14   16.56
  -1   0 -17   45.60   15.88
  -1   0 -18   24.25   13.06
  -1   0 -18   37.44   16.35
  -1   0 -19   -2.39    9.73
  -1   0 -19   -1.02   11.23
  -1   0 -20   28.52   14.73
  -1   0 -20   16.91   14.09
  -1   0 -21   17.08   14.69
   1   1 -21    0.00   11.40
   1   1 -20   -1.79    9.95
   1   1 -19    3.03   10.72
   1   1 -18    0.21   10.97
   1   1 -18    6.02   10.42
   1   1 -17   48.93   17.03
   1   1 -17   56.57   16.78
   1   1 -16   75.65   18.61
   1   1 -16   57.38   15.33
   1   1 -15   28.99   12.72
   1   1 -15   17.59   11.01
   1   1 -14   71.81   17.85
   1   1 -14   72.24   15.63
   1   1 -13    0.26    7.56
   1   1 -13    0.04    7.04
   1   1 -12    3.54    7.04
   1   1 -12    4.14    6.57
  -1  -1  11   55.33    8.11
   1   1 -11   62.42   13.79
   1   1 -11   61.14   12.59
  -1  -1  10   64.64    7.64
   1   1 -10   85.21   15.41
   1   1 -10   66.90   12.51
  -1  -1   9   32.62    6.06
   1   1  -9   36.46   10.25
   1   1  -9   39.23    9.14
  -1  -1   8  827.76   21.22
   1   1  -8  832.37   32.28
   1   1  -8  803.12   28.56
  -1  -1   7   21.77    4.91
   1   1  -7   25.83    9.35
   1   1  -7   20.28    6.36
  -1  -1   6   74.33    6.70
   1   1  -6   77.74   11.61
   1   1  -6   75.82    8.84
  -1  -1   5  370.70   12.55
   1   1  -5  338.68   17.16
   1   1  -5  357.55   15.07
  -1  -1   4  414.88   12.47
   1   1  -4  408.86   16.86
   1   1  -4  424.57   14.52
  -1  -1   3  649.05   14.34
   1   1  -3  732.68   20.24
   1   1  -3  713.17   15.71
  -1  -1   2 1053.43   16.91
   1   1  -2 1125.02   17.29
   1   1  -2 1181.20   22.03
   1   1  -2 1167.12   15.71
  -1  -1   1   52.00    4.44
  -1  -1   1   58.83    2.73
   1   1  -1   59.34    4.95
   1   1  -1   54.48    2.73
  -1  -1   0 1315.22   16.78
  -1  -1   0 1117.81   15.63
  -1  -1   0 1078.40   13.96
  -1  -1   0  908.87    7.43
   1   1   0  967.23   14.56
   1   1   0 1081.56   14.05
   1   1   0 1045.91    7.94
  -1  -1  -1  582.66   11.27
  -1  -1  -1  527.08    7.30
  -1  -1  -1  538.99    9.65
   1   1   1  550.94   10.97
   1   1   1  541.76    7.43
   1   1   1  544.58    9.61
  -1  -1  -2 1796.27   20.07
  -1  -1  -2 1849.72   14.94
  -1  -1  -2 1752.47   22.50
   1   1   2 1805.92   20.24
   1   1   2 1770.23   14.60
   1   1   2 1660.21   24.51
  -1  -1  -3 3838.62   30.91
  -1  -1  -3 3816.42   28.60
  -1  -1  -3 3771.16   39.28
   1   1   3 3730.48   30.61
   1   1   3 3905.39   28.77
  -1  -1  -4  922.45   18.74
  -1  -1  -4  963.69   17.97
  -1  -1  -4  938.59   22.93
   1   1   4  918.69   16.39
  -1  -1  -5   92.73    7.64
  -1  -1  -5   99.52    9.52
   1   1   5   89.01    6.10
  -1  -1  -6  523.19   17.59
  -1  -1  -6  492.41   20.45
   1   1   6  511.28   14.05
  -1  -1  -7  620.57   21.18
  -1  -1  -7  576.94   23.74
   1   1   7  603.24   16.14
  -1  -1  -8  293.34   16.69
  -1  -1  -8  293.17   18.91
   1   1   8  310.50   13.36
  -1  -1  -9  250.60   16.78
  -1  -1  -9  260.17   18.70
   1   1   9  262.04   12.30
  -1  -1 -10  361.47   20.53
  -1  -1 -10  387.81   24.12
   1   1  10  336.16   14.09
  -1  -1 -11   23.61    8.24
  -1  -1 -11   28.13    9.52
   1   1  11   26.94    5.76
  -1  -1 -12  185.75   17.46
  -1  -1 -12  212.01   20.92
   1   1  12  218.93   12.38
  -1  -1 -13   -1.11    5.59
  -1  -1 -13   -1.45    6.32
  -1  -1 -14   -0.98    5.76
  -1  -1 -14   -0.13    6.45
  -1  -1 -15    2.82    7.21
  -1  -1 -15    2.01    8.67
  -1  -1 -16   -0.73    7.26
  -1  -1 -16    4.74    9.05
  -1  -1 -17   12.89    9.95
  -1  -1 -17   12.25   11.61
  -1  -1 -18    0.55    8.92
  -1  -1 -18   -0.43   10.20
  -1  -1 -19   63.27   18.02
  -1  -1 -19   92.56   22.20
  -1  -1 -20   -1.84   12.12
  -1  -1 -21   15.41   14.69
  -1  -1 -22    2.26   14.00
   1   2 -21   -1.45   14.00
   1   2 -20   -3.20   11.40
   1   2 -19    3.63   10.33
   1   2 -18    3.50   11.48
   1   2 -18   10.08   13.15
   1   2 -17   38.29   16.35
   1   2 -17   14.43   11.31
   1   2 -16   40.13   15.97
   1   2 -16   31.63   14.00
   1   2 -15   48.71   16.48
   1   2 -15   46.41   14.00
   1   2 -14   11.36   10.93
   1   2 -14   18.10   10.16
   1   2 -13   66.43   16.22
   1   2 -13   73.26   15.45
   1   2 -12  100.88   18.19
   1   2 -12   86.66   15.20
   1   2 -11   12.55    8.62
   1   2 -11    3.46    6.62
  -1  -2  10  189.72   10.59
   1   2 -10  215.00   20.58
   1   2 -10  219.78   18.14
  -1  -2   9  401.73   14.30
   1   2  -9  385.38   24.68
   1   2  -9  405.70   22.50
  -1  -2   8  207.31   10.33
   1   2  -8  219.78   18.36
   1   2  -8  233.91   16.48
  -1  -2   7    7.47    3.37
   1   2  -7   -1.49    4.44
   1   2  -7    3.84    4.61
  -1  -2   6   89.10    6.87
   1   2  -6  104.94   11.78
   1   2  -6   96.53    9.95
  -1  -2   5   60.45    5.85
   1   2  -5   66.17   10.72
   1   2  -5   66.09    8.03
  -1  -2   4   92.09    6.45
   1   2  -4   93.07    6.66
   1   2  -4   91.92    9.65
   1   2  -4   92.90    8.28
  -1  -2   3  675.77   14.98
  -1  -2   3  699.55   17.12
   1   2  -3  709.20   15.37
   1   2  -3  677.31   20.88
   1   2  -3  762.05   17.72
  -1  -2   2 8368.67   49.69
   1   2  -2 9999.00   55.16
   1   2  -2 7501.38   60.54
  -1  -2   1 1172.45   16.52
   1   2  -1 1433.43   21.13
   1   2  -1 1251.56   21.69
   1   2  -1 1204.39   16.65
  -1  -2   0  603.11   12.47
  -1  -2   0  541.25   11.01
   1   2   0  522.38   13.11
   1   2   0  577.20   12.34
   1   2   0  536.85   10.93
  -1  -2  -1  739.09   10.08
  -1  -2  -1  735.97   14.17
   1   2   1  863.45   17.33
   1   2   1  816.14   10.59
  -1  -2  -2 1130.57   20.15
   1   2   2 1189.10   21.05
  -1  -2  -3 2753.55   15.80
  -1  -2  -3 2593.42   34.58
   1   2   3 2743.86   33.09
   1   2   3 2774.64   16.05
  -1  -2  -4 1520.91   18.02
  -1  -2  -4 1434.20   29.12
   1   2   4 1470.57   25.66
   1   2   4 1429.84   17.50
  -1  -2  -5   12.17    3.50
  -1  -2  -5   12.89    5.51
   1   2   5   12.30    4.06
  -1  -2  -6  953.74   21.00
  -1  -2  -6  889.36   27.49
   1   2   6  908.91   22.29
  -1  -2  -7  289.11   13.62
  -1  -2  -7  285.44   17.33
   1   2   7  252.99   12.81
  -1  -2  -8   49.10    8.37
  -1  -2  -8   49.35    9.99
   1   2   8   52.68    8.84
  -1  -2  -9   14.17    6.02
  -1  -2  -9   13.06    6.79
   1   2   9   15.54    5.34
  -1  -2 -10   63.95   10.80
  -1  -2 -10   63.78   12.64
   1   2  10   63.27    9.31
  -1  -2 -11  308.36   19.42
  -1  -2 -11  324.84   23.82
   1   2  11  348.41   17.16
  -1  -2 -12    1.15    5.17
  -1  -2 -12    5.55    6.66
   1   2  12    7.47    4.70
  -1  -2 -13    9.22    6.83
  -1  -2 -13    3.24    7.68
   1   2  13    4.78    4.61
  -1  -2 -14   -1.32    5.38
  -1  -2 -14    3.59    8.50
  -1  -2 -15    0.85    6.87
  -1  -2 -15    0.90    8.58
  -1  -2 -16    2.09    6.62
  -1  -2 -16    4.10    8.67
  -1  -2 -17    2.01    8.32
  -1  -2 -17    1.96    9.82
  -1  -2 -18   68.86   18.40
  -1  -2 -18   51.44   18.23
  -1  -2 -19   -4.61   10.25
  -1  -2 -20   26.90   15.45
  -1  -2 -21   14.52   13.28
  -1  -2 -22   17.46   16.14
   1   3 -20   -2.18   11.61
   1   3 -19    2.09   12.72
  -1  -3  18    5.29   16.31
   1   3 -18   27.02   14.47
  -1  -3  17   -2.31    8.71
   1   3 -17    0.13   10.67
   1   3 -17    5.25   10.03
  -1  -3  16   62.03   16.65
   1   3 -16   83.25   20.83
   1   3 -16  118.94   21.94
  -1  -3  15   -2.09    7.86
   1   3 -15    0.94    8.92
   1   3 -15    6.23    9.18
   1   3 -14   53.02   15.92
   1   3 -14   32.28   11.87
   1   3 -13   21.82   12.42
   1   3 -13   21.26   10.20
   1   3 -12   13.11   10.80
   1   3 -12   10.67    7.86
   1   3 -11  140.37   21.26
   1   3 -11  120.65   17.42
   1   3 -10   10.89    3.67
   1   3 -10    6.66    7.73
   1   3 -10    5.81    6.96
   1   3  -9    2.48    2.90
   1   3  -9    1.07    6.53
   1   3  -9   -2.43    4.57
   1   3  -8    0.60    2.77
   1   3  -8   -0.34    5.68
   1   3  -8    0.30    4.57
  -1  -3   7    8.54    5.46
   1   3  -7    4.70    3.20
   1   3  -7   12.38    8.37
   1   3  -7    7.64    5.42
  -1  -3   6   29.97    7.26
   1   3  -6   27.71    4.82
   1   3  -6   19.85    8.75
   1   3  -6   31.17    7.21
  -1  -3   5  471.79   19.00
   1   3  -5  551.33   15.20
   1   3  -5  617.80   25.10
   1   3  -5  583.17   20.75
  -1  -3   4  671.63   20.62
   1   3  -4  644.39   16.35
   1   3  -4  791.55   26.55
   1   3  -4  723.42   21.22
  -1  -3   3 1864.66   30.95
   1   3  -3 1730.22   26.38
   1   3  -3 2132.26   39.40
  -1  -3   2  201.59   10.25
   1   3  -2  176.28    9.26
   1   3  -2  160.22   10.76
  -1  -3   1   90.93    7.56
   1   3  -1   99.81    7.81
   1   3  -1  116.59    8.54
  -1  -3   0  180.93    9.26
   1   3   0  178.62    9.78
   1   3   0  194.04    9.22
  -1  -3  -1 1609.83   20.11
  -1  -3  -1 1441.71   24.59
   1   3   1 1439.88   26.47
   1   3   1 1507.59   19.77
  -1  -3  -2   58.45    3.71
  -1  -3  -2   51.61    6.92
   1   3   2   59.17    7.09
   1   3   2   59.13    3.80
  -1  -3  -3 3270.43   17.50
  -1  -3  -3 4485.74   19.81
  -1  -3  -3 4373.46   49.48
   1   3   3 4299.65   48.71
  -1  -3  -4  140.76    5.04
  -1  -3  -4  130.13   10.46
   1   3   4  137.85    9.99
   1   3   4  112.71    4.70
  -1  -3  -5 1588.36   19.85
  -1  -3  -5 1559.37   34.96
   1   3   5 1498.71   31.29
   1   3   5 1751.44   20.92
  -1  -3  -6  635.43   15.50
  -1  -3  -6  591.37   23.44
   1   3   6  604.90   20.92
  -1  -3  -7  391.32   14.22
  -1  -3  -7  392.60   20.96
   1   3   7  359.21   17.16
  -1  -3  -8    2.09    3.33
  -1  -3  -8    2.56    4.91
   1   3   8    6.87    5.34
  -1  -3  -9  166.88   12.00
  -1  -3  -9  158.05   15.50
   1   3   9  147.03   12.42
  -1  -3 -10   33.94    7.73
  -1  -3 -10   21.52    8.32
   1   3  10   20.11    6.49
  -1  -3 -11   10.67    6.40
  -1  -3 -11   15.11    8.75
   1   3  11   14.34    6.23
  -1  -3 -12   37.83    9.52
  -1  -3 -12   41.67   11.40
   1   3  12   49.27    9.99
  -1  -3 -13  173.29   16.18
  -1  -3 -13  187.76   20.71
   1   3  13  172.69   15.07
  -1  -3 -14   12.30    7.43
  -1  -3 -14    7.81    9.18
  -1  -3 -15    9.65    7.98
  -1  -3 -15   12.98   10.54
  -1  -3 -16    2.43    6.92
  -1  -3 -16    1.45    8.45
  -1  -3 -17   44.40   15.88
  -1  -3 -18   24.25   14.34
  -1  -3 -19   37.31   16.22
  -1  -3 -20    7.39   12.89
  -1  -3 -21   -5.25   11.48
  -1  -3 -22    8.11   16.65
   1   4 -19   -3.46   12.30
   1   4 -18   -3.03   11.57
  -1  -4  17   27.32   12.98
   1   4 -17   29.12   15.50
  -1  -4  16   10.46   10.93
   1   4 -16    6.75   10.59
   1   4 -16   -5.46    8.67
  -1  -4  15   63.14   16.65
   1   4 -15   78.55   20.24
   1   4 -15   80.09   18.49
  -1  -4  14  114.76   20.28
   1   4 -14  118.77   23.14
   1   4 -14  123.04   20.53
  -1  -4  13   24.46   10.72
   1   4 -13   23.18   13.15
   1   4 -13   25.49   10.63
  -1  -4  12   15.50    8.88
   1   4 -12   20.75   11.10
   1   4 -12   23.14    9.95
  -1  -4  11   35.43   10.97
   1   4 -11   19.42   10.67
   1   4 -11   23.65    9.56
  -1  -4  10   23.69    9.14
   1   4 -10   21.69   10.54
   1   4 -10   25.96    9.69
  -1  -4   9   10.76    7.43
   1   4  -9   14.43    4.01
   1   4  -9    4.18    7.47
   1   4  -9   12.55    7.21
  -1  -4   8   17.55    7.47
   1   4  -8   18.49    4.31
   1   4  -8   15.97    8.54
   1   4  -8   27.62    8.67
  -1  -4   7   32.79    8.54
   1   4  -7   25.23    4.95
   1   4  -7   37.27    9.99
   1   4  -7   39.32    8.71
  -1  -4   6  141.10   12.85
   1   4  -6  131.96    8.71
   1   4  -6  116.34   13.96
  -1  -4   5  826.43   26.55
   1   4  -5  797.10   19.85
   1   4  -5  913.44   32.70
  -1  -4   4  487.46   19.55
   1   4  -4  483.49   15.92
   1   4  -4  564.22   24.38
  -1  -4   3  103.02    9.90
   1   4  -3  128.67    9.22
   1   4  -3  125.73   11.87
  -1  -4   2    3.42    3.76
   1   4  -2    4.23    3.67
   1   4  -2   -0.30    3.71
  -1  -4   1  231.43   12.30
   1   4  -1  229.64   12.21
   1   4  -1  244.58   13.11
  -1  -4   0    4.48    3.63
   1   4   0    4.48    4.18
   1   4   0    3.37    3.29
  -1  -4  -1  794.97   21.82
   1   4   1  905.88   24.21
   1   4   1  864.17   18.61
  -1  -4  -2 2003.28   35.31
   1   4   2 2099.85   37.74
   1   4   2 2058.66   24.51
  -1  -4  -3  107.84    5.42
  -1  -4  -3  120.86   10.25
   1   4   3  126.20   10.72
  -1  -4  -4 1091.04   14.52
  -1  -4  -4 1286.65   31.98
   1   4   4 1204.30   30.40
  -1  -4  -5  432.81   10.16
  -1  -4  -5  460.99   20.62
   1   4   5  438.19   19.51
  -1  -4  -6    9.43    3.16
  -1  -4  -6   12.47    6.06
   1   4   6   10.16    5.25
  -1  -4  -7  484.04   14.94
  -1  -4  -7  437.85   22.63
   1   4   7  484.68   22.37
  -1  -4  -8  107.63    8.84
  -1  -4  -8  113.65   13.79
   1   4   8   95.67   11.19
  -1  -4  -9  186.05   11.70
  -1  -4  -9  168.76   16.31
   1   4   9  164.32   14.09
  -1  -4 -10   -2.26    3.33
  -1  -4 -10    0.13    5.17
   1   4  10    4.01    4.87
  -1  -4 -11   46.11    8.92
  -1  -4 -11   33.26   10.93
   1   4  11   33.00    8.88
  -1  -4 -12   97.34   13.36
  -1  -4 -12  102.03   18.06
   1   4  12   95.42   14.17
  -1  -4 -13  161.50   15.20
  -1  -4 -13  139.69   21.69
   1   4  13  179.69   16.74
  -1  -4 -14   91.06   14.39
  -1  -4 -14   84.96   18.66
   1   4  14   93.62   15.03
  -1  -4 -15   12.34    7.60
  -1  -4 -15   -1.07    7.90
  -1  -4 -16    5.51   11.06
  -1  -4 -17   37.31   16.01
  -1  -4 -18   78.94   20.32
  -1  -4 -19    7.56   12.47
  -1  -4 -20   11.19   11.70
  -1  -4 -21   12.47   14.47
   1   5 -19    7.00   14.34
   1   5 -18   -8.32    8.50
   1   5 -17   25.83   16.35
  -1  -5  16    6.75   10.42
   1   5 -16    9.43   11.53
  -1  -5  15   79.62   18.14
   1   5 -15   60.37   19.25
   1   5 -15   79.19   18.36
  -1  -5  14    1.54    8.88
   1   5 -14    7.90   11.10
   1   5 -14   11.06    9.86
  -1  -5  13  183.92   21.82
   1   5 -13  208.72   30.57
   1   5 -13  153.48   21.99
  -1  -5  12   50.33   13.28
   1   5 -12   59.17   17.12
   1   5 -12   58.45   14.77
  -1  -5  11   18.31    9.09
   1   5 -11    0.85    7.77
   1   5 -11    6.66    7.60
  -1  -5  10   15.50    8.07
   1   5 -10    1.96    8.11
  -1  -5   9   33.04    9.99
   1   5  -9   41.92   12.59
  -1  -5   8  112.28   16.01
   1   5  -8  139.77    9.22
   1   5  -8  141.31   20.96
  -1  -5   7   97.81   14.17
   1   5  -7   91.02    7.94
   1   5  -7  120.73   18.02
  -1  -5   6  326.30   19.64
   1   5  -6  334.75   14.30
   1   5  -6  318.31   21.90
  -1  -5   5   88.71   11.01
   1   5  -5  122.83    9.61
   1   5  -5   94.61   14.34
  -1  -5   4  610.80   23.78
   1   5  -4  757.91   22.11
   1   5  -4  692.04   28.30
  -1  -5   3    3.59    4.27
   1   5  -3    3.93    3.67
   1   5  -3    2.82    4.78
  -1  -5   2  138.24   11.65
   1   5  -2  153.52   11.23
   1   5  -2  166.11   12.85
  -1  -5   1  877.79   25.66
   1   5  -1  969.03   26.68
   1   5  -1  938.93   26.73
  -1  -5   0  178.54   12.30
   1   5   0  187.42   12.68
   1   5   0  187.25   11.78
  -1  -5  -1  342.01   16.86
   1   5   1  325.74   16.65
   1   5   1  375.01   14.56
  -1  -5  -2    7.64    5.12
   1   5   2    9.01    5.17
   1   5   2   11.06    3.71
  -1  -5  -3 1503.32   35.82
   1   5   3 1545.58   36.97
  -1  -5  -4 1252.20   19.47
  -1  -5  -4 1623.88   38.59
   1   5   4 1709.18   39.87
  -1  -5  -5   10.25    2.99
  -1  -5  -5    7.81    5.59
   1   5   5   16.95    7.00
  -1  -5  -6  966.98   17.46
  -1  -5  -6  945.25   32.66
   1   5   6  797.92   29.37
  -1  -5  -7    7.00    2.90
  -1  -5  -7    1.96    4.57
   1   5   7    6.66    5.55
  -1  -5  -8  254.15   11.48
  -1  -5  -8  264.90   20.15
   1   5   8  276.26   19.13
  -1  -5  -9  355.16   14.73
  -1  -5  -9  375.90   24.55
   1   5   9  340.34   20.92
  -1  -5 -10   23.10    6.02
  -1  -5 -10   28.60    9.78
   1   5  10   22.07    8.15
  -1  -5 -11   23.57    6.62
  -1  -5 -11   13.70    8.32
   1   5  11   14.34    7.43
  -1  -5 -12  205.99   15.37
  -1  -5 -12  237.92   23.40
   1   5  12  173.63   17.29
  -1  -5 -13   67.97   12.00
  -1  -5 -13   58.06   15.58
   1   5  13   47.60   12.04
  -1  -5 -14   72.49   13.75
  -1  -5 -14   81.84   18.44
   1   5  14   98.75   16.99
  -1  -5 -15    4.40    8.71
   1   5  15   18.02    9.43
  -1  -5 -16   19.81   12.17
  -1  -5 -17   21.35   12.68
  -1  -5 -18    7.68   11.48
  -1  -5 -19   -5.08    9.18
  -1  -5 -20   22.41   14.98
  -1  -5 -21    1.32   13.45
   1   6 -18    5.21   12.98
   1   6 -17    0.43   10.08
   1   6 -16    3.84   10.46
  -1  -6  15   -0.43    9.52
   1   6 -15    1.49    9.48
  -1  -6  14   22.24   11.70
   1   6 -14   28.60   14.17
  -1  -6  13    8.45   10.25
   1   6 -13    1.49    8.24
  -1  -6  12    7.81    8.62
   1   6 -12   -1.79    8.28
  -1  -6  11  174.44   19.98
   1   6 -11  196.38   28.95
  -1  -6  10   36.67   11.61
   1   6 -10   43.03   14.26
  -1  -6   9   -1.11    5.38
   1   6  -9   -2.01    6.45
  -1  -6   8   80.22   14.00
   1   6  -8   86.20    8.54
   1   6  -8   73.94   15.67
  -1  -6   7   15.50    7.04
   1   6  -7   14.43    4.95
   1   6  -7   10.63    7.90
  -1  -6   6    3.12    5.38
   1   6  -6    4.40    3.76
   1   6  -6    9.56    6.75
  -1  -6   5   22.54    7.39
   1   6  -5   28.82    6.75
   1   6  -5   29.63    9.61
  -1  -6   4   93.32   13.19
   1   6  -4   81.58    9.18
   1   6  -4   89.14   14.30
  -1  -6   3  677.95   26.43
   1   6  -3  665.70   23.69
   1   6  -3  607.21   26.73
   1   6  -2 1082.16   30.52
   1   6  -2  988.41   31.89
  -1  -6   1  180.33   15.11
   1   6  -1  180.54   14.52
   1   6  -1  163.89   13.28
  -1  -6   0  741.26   26.38
   1   6   0  842.19   28.05
   1   6   0  865.62   26.30
  -1  -6  -1  208.72   14.94
   1   6   1  201.85   14.77
   1   6   1  184.60   12.12
  -1  -6  -2 1062.09   32.36
   1   6   2 1058.25   32.79
   1   6   2 1147.61   25.91
  -1  -6  -3  316.26   19.00
   1   6   3  311.78   18.87
  -1  -6  -4  941.28   32.57
   1   6   4  991.99   33.51
  -1  -6  -5  990.16   19.68
  -1  -6  -5 1141.37   36.46
   1   6   5 1184.75   37.40
  -1  -6  -6  416.55   12.76
  -1  -6  -6  393.32   23.27
   1   6   6  326.98   20.71
  -1  -6  -7  200.31    9.35
  -1  -6  -7  196.51   17.67
   1   6   7  178.15   16.27
  -1  -6  -8  117.49    7.98
  -1  -6  -8  102.72   16.14
   1   6   8  113.73   14.17
  -1  -6  -9  138.28    9.39
  -1  -6  -9  127.56   15.84
   1   6   9  134.99   15.50
  -1  -6 -10    0.21    3.24
  -1  -6 -10    5.46    7.09
   1   6  10    9.48    8.03
  -1  -6 -11  151.98   11.70
  -1  -6 -11  131.24   19.77
   1   6  11  150.49   17.12
  -1  -6 -12    6.57    5.12
  -1  -6 -12    3.67    8.07
   1   6  12    0.77    5.93
  -1  -6 -13   19.17   10.80
   1   6  13   29.33   10.84
  -1  -6 -14    5.29    8.50
   1   6  14    2.95    7.56
  -1  -6 -15    6.32    9.73
   1   6  15   -0.60    7.73
  -1  -6 -16   19.89   13.06
  -1  -6 -17   19.89   12.89
  -1  -6 -18    2.77   10.16
  -1  -6 -19   24.76   15.37
  -1  -6 -20    2.22   10.97
  -1  -6 -21   14.13   14.43
   1   7 -17    7.47   12.51
   1   7 -16    1.88   10.42
   1   7 -15   -5.76    8.32
  -1  -7  14   19.30   12.30
   1   7 -14   26.81   15.07
  -1  -7  13    2.39    8.88
   1   7 -13   -2.09    8.58
  -1  -7  12  106.69   19.60
   1   7 -12  115.48   22.84
  -1  -7  11   12.38    8.71
   1   7 -11    6.32    9.90
  -1  -7  10   93.37   17.25
   1   7 -10   77.96   18.78
  -1  -7   9   -4.74    5.46
   1   7  -9   -7.86    6.83
  -1  -7   8   43.59   11.40
   1   7  -8   37.95   12.85
  -1  -7   7   90.12   15.37
   1   7  -7  126.67   11.65
   1   7  -7   86.75   16.61
  -1  -7   6    6.96    6.70
   1   7  -6    9.01    5.17
   1   7  -6    5.29    6.40
  -1  -7   5    8.79    6.87
   1   7  -5    8.20    5.72
   1   7  -5    1.75    6.19
  -1  -7   4    2.77    4.78
   1   7  -4    3.88    4.78
   1   7  -4    0.81    5.51
  -1  -7   3  203.81   16.91
   1   7  -3  186.78   14.52
   1   7  -3  220.16   17.76
  -1  -7   2  308.66   19.94
   1   7  -2  313.19   18.70
   1   7  -2  292.23   19.13
  -1  -7   1  181.74   16.44
   1   7  -1  197.66   16.27
   1   7  -1  180.46   14.81
  -1  -7   0  370.01   21.52
   1   7   0  377.18   21.39
   1   7   0  395.16   19.77
  -1  -7  -1  284.24   18.83
   1   7   1  273.19   18.74
   1   7   1  264.09   15.67
  -1  -7  -2  389.74   21.90
   1   7   2  417.40   22.80
   1   7   2  455.65   18.70
  -1  -7  -3   88.37   13.92
   1   7   3  119.50   16.56
  -1  -7  -4  169.15   17.12
   1   7   4  178.20   17.08
  -1  -7  -5   64.55    6.83
  -1  -7  -5   81.84   13.75
   1   7   5   68.31   12.76
  -1  -7  -6   10.97    3.84
  -1  -7  -6   19.08    8.45
   1   7   6    9.56    7.77
  -1  -7  -7  147.07    8.88
  -1  -7  -7  177.77   17.55
   1   7   7  165.00   16.74
  -1  -7  -8  232.33   10.93
  -1  -7  -8  236.09   20.66
   1   7   8  224.65   19.72
  -1  -7  -9   12.34    4.31
  -1  -7  -9   13.53    8.24
   1   7   9   10.08    8.58
  -1  -7 -10  121.67    9.52
  -1  -7 -10  111.55   18.49
   1   7  10  130.34   19.77
  -1  -7 -11   10.12    8.37
   1   7  11    6.02    8.37
  -1  -7 -12    6.79    8.54
   1   7  12   -1.75    7.47
  -1  -7 -13   68.01   17.59
   1   7  13   60.92   15.03
  -1  -7 -14   14.56   11.48
   1   7  14   19.77   11.06
  -1  -7 -15  107.71   22.93
   1   7  15   85.77   18.31
  -1  -7 -16   -5.81    9.61
   1   7  16    2.22    8.79
  -1  -7 -17   76.72   20.71
  -1  -7 -18   20.88   15.03
  -1  -7 -19    2.65   12.94
  -1  -7 -20   28.22   18.19
  -1  -7 -21    0.90   14.05
   1   8 -16   -9.39    9.26
   1   8 -15    1.45   11.57
  -1  -8  14    0.98   11.31
   1   8 -14    1.37    9.18
  -1  -8  13   28.69   13.83
   1   8 -13   19.42   13.92
  -1  -8  12   -1.41    7.98
   1   8 -12   -3.12    8.84
  -1  -8  11   59.77   15.67
   1   8 -11   50.89   17.08
  -1  -8  10    4.44    8.50
   1   8 -10   10.97   11.23
  -1  -8   9    8.54    8.24
   1   8  -9    3.59    9.48
  -1  -8   8    8.79    7.90
   1   8  -8   18.02   10.72
  -1  -8   7    0.13    5.72
   1   8  -7    2.95    5.29
   1   8  -7   -7.73    6.49
  -1  -8   6   18.78    8.37
   1   8  -6   14.52    7.43
   1   8  -6    1.37    6.75
  -1  -8   5   36.76   10.59
   1   8  -5   38.89    9.43
   1   8  -5   36.03   11.44
  -1  -8   4   21.22    8.45
   1   8  -4   25.66    8.11
   1   8  -4   35.48   11.23
  -1  -8   3   10.72    7.60
   1   8  -3   12.30    7.17
   1   8  -3   16.39    8.50
  -1  -8   2    1.45    5.72
   1   8  -2    2.31    5.04
   1   8  -2   10.20    6.79
  -1  -8   1  585.69   28.60
   1   8  -1  590.82   27.62
   1   8  -1  589.49   27.24
  -1  -8   0  239.46   19.30
   1   8   0  224.73   18.31
   1   8   0  226.14   16.78
  -1  -8  -1  520.46   26.77
   1   8   1  468.12   25.79
   1   8   1  558.97   24.04
  -1  -8  -2  226.48   19.25
   1   8   2  246.63   19.42
   1   8   2  246.93   15.80
  -1  -8  -3  589.71   29.07
   1   8   3  622.49   30.23
  -1  -8  -4   82.99   14.69
   1   8   4   95.20   15.92
  -1  -8  -5  228.87   19.77
   1   8   5  209.06   19.17
  -1  -8  -6   53.96    7.56
  -1  -8  -6   77.27   14.94
   1   8   6   58.23   13.15
  -1  -8  -7  167.14   10.16
  -1  -8  -7  164.24   22.11
   1   8   7  148.44   17.59
  -1  -8  -8    7.56    3.97
  -1  -8  -8   12.64    8.24
   1   8   8   15.16    8.75
  -1  -8  -9  285.14   13.79
  -1  -8  -9  272.63   23.95
   1   8   9  277.75   23.61
  -1  -8 -10   13.02    9.26
   1   8  10    5.08    8.79
  -1  -8 -11   84.74   18.27
   1   8  11   94.78   19.00
  -1  -8 -12    3.46    9.26
   1   8  12    6.79    8.88
  -1  -8 -13   -1.54    7.60
   1   8  13   -4.95    7.04
  -1  -8 -14   26.90   14.26
   1   8  14   34.41   13.49
  -1  -8 -15    6.02   11.53
   1   8  15   11.31   11.06
  -1  -8 -16   47.94   18.70
   1   8  16   53.71   16.74
  -1  -8 -17   -7.98    9.56
   1   8  17   -8.24    9.01
  -1  -8 -18    9.48   13.96
  -1  -8 -19   10.84   14.56
  -1  -8 -20    9.78   12.68
   1   9 -15   -9.31   10.03
   1   9 -14   28.05   15.84
  -1  -9  13   -1.02    9.56
   1   9 -13    2.95   11.65
  -1  -9  12   12.55   10.80
   1   9 -12    4.53   12.08
  -1  -9  11   -0.98    8.28
   1   9 -11    0.90    9.69
  -1  -9  10    0.98    8.15
   1   9 -10   -0.64    8.92
  -1  -9   9   24.55   11.10
   1   9  -9   21.18   12.38
  -1  -9   8   72.24   15.63
   1   9  -8   86.75   20.45
  -1  -9   7   -2.95    6.40
   1   9  -7   -0.47    7.64
  -1  -9   6    8.32    8.28
   1   9  -6    5.93    6.79
   1   9  -6   12.94    9.18
  -1  -9   5    2.13    6.92
   1   9  -5    5.25    6.40
   1   9  -5   -8.50    5.81
  -1  -9   4   51.10   12.64
   1   9  -4   52.94   12.38
   1   9  -4   74.58   15.28
  -1  -9   3   31.17   10.93
   1   9  -3   11.01    7.94
   1   9  -3   17.67    8.45
  -1  -9   2   44.57   12.08
   1   9  -2   40.09   10.46
   1   9  -2   47.39   11.70
  -1  -9   1   24.12    9.48
   1   9  -1   24.80    9.39
   1   9  -1   15.58    7.64
  -1  -9   0  652.25   32.53
   1   9   0  571.01   30.14
   1   9   0  637.78   29.03
  -1  -9  -1  325.31   23.61
   1   9   1  341.92   23.86
   1   9   1  342.22   20.92
  -1  -9  -2  233.61   20.62
   1   9   2  231.09   20.41
  -1  -9  -3  202.23   20.32
   1   9   3  203.13   20.53
  -1  -9  -4   36.07   12.00
   1   9   4   53.62   13.45
  -1  -9  -5  137.38   19.98
   1   9   5  143.96   17.67
  -1  -9  -6   23.95    6.19
  -1  -9  -6   24.85    9.69
   1   9   6   24.68   11.01
  -1  -9  -7   48.97    7.94
  -1  -9  -7   50.38   13.23
   1   9   7   43.42   12.94
  -1  -9  -8    5.81    8.24
   1   9   8    2.60    8.11
  -1  -9  -9    7.17    7.47
   1   9   9    6.28    8.41
  -1  -9 -10   -4.70    7.04
   1   9  10    8.62   11.14
  -1  -9 -11  160.27   25.70
   1   9  11  132.30   22.71
  -1  -9 -12    2.48    8.32
   1   9  12   -1.54    9.09
  -1  -9 -13   18.74   12.38
   1   9  13   22.97   13.83
  -1  -9 -14    2.99   10.20
   1   9  14   23.69   13.19
  -1  -9 -15   26.94   14.86
   1   9  15   36.20   15.37
  -1  -9 -16    0.43   10.76
   1   9  16   -3.24    9.56
  -1  -9 -17   27.75   17.42
   1   9  17   20.02   13.62
  -1  -9 -18    0.34   11.65
  -1  -9 -19    3.46   15.33
   1  10 -14    6.06   12.17
   1  10 -13    4.99   11.27
  -1 -10  12   -2.82    9.56
   1  10 -12   -6.53   10.33
  -1 -10  11    0.00    8.92
   1  10 -11   -2.52    9.31
  -1 -10  10    8.24   10.20
   1  10 -10   -1.11    9.35
  -1 -10   9   16.05   11.48
   1  10  -9    5.46   12.17
  -1 -10   8   -0.64    8.62
   1  10  -8   10.29   11.14
  -1 -10   7   42.14   14.39
   1  10  -7   51.79   17.12
  -1 -10   6   -4.35    7.68
   1  10  -6   -3.54    7.17
  -1 -10   5   26.04   10.72
   1  10  -5   35.48   11.19
   1  10  -5   24.93   11.91
  -1 -10   4   -1.88    6.15
   1  10  -4   -0.90    6.96
   1  10  -4    6.32    8.07
  -1 -10   3   42.69   12.72
   1  10  -3   34.71   11.91
   1  10  -3   28.39   10.80
  -1 -10   2   20.28   10.42
   1  10  -2   23.14   10.63
   1  10  -2   21.35    9.86
  -1 -10   1  109.21   18.40
   1  10  -1  113.43   19.00
   1  10  -1   96.74   16.18
  -1 -10   0  219.61   22.33
   1  10   0  242.19   24.33
   1  10   0  223.71   19.51
  -1 -10  -1   10.89    9.01
   1  10   1   10.42    9.52
   1  10   1    3.07    5.89
  -1 -10  -2  334.66   25.91
   1  10   2  382.78   27.58
  -1 -10  -3   30.82   12.64
   1  10   3   53.28   13.83
  -1 -10  -4  192.67   22.41
   1  10   4  204.75   22.37
  -1 -10  -5  104.00   19.34
   1  10   5  129.23   21.86
  -1 -10  -6  330.18   17.55
  -1 -10  -6  345.04   28.01
   1  10   6  304.74   27.24
  -1 -10  -7   37.65   13.70
   1  10   7   53.88   15.45
  -1 -10  -8   37.31   13.23
   1  10   8   70.78   17.46
  -1 -10  -9    7.09    9.61
   1  10   9    0.81    8.58
  -1 -10 -10   90.34   20.07
   1  10  10  108.18   22.24
  -1 -10 -11    3.88    9.18
   1  10  11   -4.40   10.25
  -1 -10 -12   74.41   19.81
   1  10  12   70.95   19.21
  -1 -10 -13    0.43    9.26
   1  10  13    5.85   10.25
  -1 -10 -14   25.91   15.45
   1  10  14   17.42   13.06
  -1 -10 -15   -9.31   10.12
   1  10  15   -0.30   11.74
  -1 -10 -16    4.99   13.75
   1  10  16   11.87   13.58
  -1 -10 -17   15.71   14.56
   1  10  17    5.76   12.76
  -1 -10 -18   12.34   17.03
   1  10  18   -0.55   13.58
  -1 -10 -19    9.65   14.81
   1  11 -13   15.28   14.81
   1  11 -12   10.20   12.81
  -1 -11  11   -3.84   10.42
   1  11 -11    9.22   12.04
  -1 -11  10    7.56   10.50
   1  11 -10   -2.82    9.61
  -1 -11   9    3.84    9.90
   1  11  -9   12.81   12.98
  -1 -11   8    1.66    9.56
   1  11  -8   -3.88   10.12
  -1 -11   7   13.11   10.80
   1  11  -7    7.00   10.84
  -1 -11   6   24.89   12.64
   1  11  -6   21.94   12.94
  -1 -11   5   26.34   12.04
   1  11  -5   31.89   12.64
   1  11  -5   16.44   10.37
  -1 -11   4  130.34   22.33
   1  11  -4  118.51   19.21
   1  11  -4  129.61   21.94
  -1 -11   3   53.96   16.44
   1  11  -3   75.91   18.27
   1  11  -3   62.16   15.71
  -1 -11   2   57.04   15.24
   1  11  -2   51.44   14.17
   1  11  -2   85.51   17.72
  -1 -11   1    9.14    9.43
   1  11  -1   -7.04    7.21
   1  11  -1    2.60    7.98
  -1 -11   0   34.20   13.49
   1  11   0   11.01   10.72
   1  11   0   29.80   11.10
  -1 -11  -1  147.59   23.52
   1  11   1  166.88   25.49
  -1 -11  -2  165.47   24.08
   1  11   2  196.81   24.51
  -1 -11  -3   53.66   15.67
   1  11   3   49.65   15.54
  -1 -11  -4  341.96   29.59
   1  11   4  383.08   30.57
  -1 -11  -5   26.68   11.95
   1  11   5   35.86   13.92
  -1 -11  -6  193.95   27.19
   1  11   6  175.04   25.79
  -1 -11  -7   23.18   12.12
   1  11   7   22.97   12.76
  -1 -11  -8    3.63    9.56
   1  11   8   28.09   14.73
  -1 -11  -9   15.28   12.47
   1  11   9   12.04   12.64
  -1 -11 -10   69.80   19.55
   1  11  10   52.72   16.74
  -1 -11 -11   59.90   17.63
   1  11  11   61.52   18.14
  -1 -11 -12   37.74   17.42
   1  11  12   32.10   16.18
  -1 -11 -13   18.40   14.22
   1  11  13   -3.07   10.93
  -1 -11 -14   -3.16   12.34
   1  11  14    4.44   11.19
  -1 -11 -15   -4.99   12.42
   1  11  15    6.62   13.02
  -1 -11 -16    9.56   16.09
   1  11  16    9.43   13.36
  -1 -11 -17    8.58   15.20
   1  11  17   -0.38   13.36
  -1 -11 -18   28.43   19.85
   1  11  18   25.15   17.97
   1  12 -12    3.54   12.08
   1  12 -11    0.09   12.51
  -1 -12  10   19.55   13.58
   1  12 -10   -1.92   10.89
  -1 -12   9   -4.99    9.73
   1  12  -9   -7.26   10.63
  -1 -12   8   -4.87    9.95
   1  12  -8    2.99   12.25
  -1 -12   7   -0.43   10.33
   1  12  -7    1.41    9.90
  -1 -12   6   42.39   15.11
   1  12  -6   31.85   14.22
  -1 -12   5    8.03   10.67
   1  12  -5   33.90   14.98
  -1 -12   4   45.25   15.20
   1  12  -4   18.49   11.70
   1  12  -4   25.02   13.32
  -1 -12   3   35.73   13.87
   1  12  -3   39.36   14.64
   1  12  -3   54.65   16.65
  -1 -12   2   78.77   19.42
   1  12  -2  111.85   20.62
   1  12  -2   94.73   18.57
  -1 -12   1    4.27   10.37
   1  12  -1    4.31    9.61
   1  12  -1    0.90    8.07
  -1 -12   0   95.80   20.32
   1  12   0  105.96   19.72
   1  12   0  106.26   19.04
  -1 -12  -1    1.96   10.37
   1  12   1   19.85   14.39
  -1 -12  -2   18.83   13.19
   1  12   2   26.73   15.24
  -1 -12  -3   97.17   21.99
   1  12   3   87.22   22.20
  -1 -12  -4    9.26   11.19
   1  12   4   -1.28   10.25
  -1 -12  -5   32.45   13.66
   1  12   5   40.51   15.58
  -1 -12  -6    7.17    9.69
   1  12   6    0.43    8.75
  -1 -12  -7    4.27   10.33
   1  12   7    6.75   11.31
  -1 -12  -8    8.24   11.78
   1  12   8   -1.45    9.39
  -1 -12  -9    2.60    9.01
   1  12   9   -9.39    7.81
  -1 -12 -10   18.87   12.85
   1  12  10   27.02   14.34
  -1 -12 -11    8.71   13.23
   1  12  11   20.02   14.22
  -1 -12 -12   15.80   14.05
   1  12  12    5.55   12.30
  -1 -12 -13   -2.48   10.46
   1  12  13   -1.37   12.76
  -1 -12 -14   20.92   16.31
   1  12  14   25.62   17.55
  -1 -12 -15   28.01   17.76
   1  12  15   20.45   16.95
  -1 -12 -16   -4.06   11.74
   1  12  16    2.31   12.81
  -1 -12 -17   53.83   22.63
   1  12  17   47.52   21.00
   1  12  18   -5.89   13.92
   1  13 -10    4.06   11.91
  -1 -13   9   -1.62   11.83
   1  13  -9    2.60   12.68
  -1 -13   8   12.94   13.28
   1  13  -8   -4.99   10.72
  -1 -13   7   -0.38   10.76
   1  13  -7    9.86   12.55
  -1 -13   6    3.71   11.78
   1  13  -6    3.03   12.25
  -1 -13   5   13.41   12.34
   1  13  -5    7.98   11.74
  -1 -13   4   -4.70   10.80
   1  13  -4    7.94   10.37
  -1 -13   3   -6.53    9.82
   1  13  -3    8.54   11.44
   1  13  -3   -0.09    9.95
  -1 -13   2    0.77   11.01
   1  13  -2    5.42   10.67
   1  13  -2    1.15    9.52
  -1 -13   1   26.47   14.26
   1  13  -1   49.01   16.65
   1  13  -1   45.08   14.64
  -1 -13   0   62.25   19.13
   1  13   0   46.15   16.35
  -1 -13  -1   77.19   19.13
   1  13   1  126.33   23.95
  -1 -13  -2   76.16   19.25
   1  13   2   51.70   16.82
  -1 -13  -3   -3.33    9.90
   1  13   3   13.62   11.36
  -1 -13  -4    7.51   11.53
   1  13   4   12.85   11.36
  -1 -13  -5   15.84   12.30
   1  13   5    3.80   11.74
  -1 -13  -6   -3.50    9.14
   1  13   6   -1.28   10.08
  -1 -13  -7   57.76   18.44
   1  13   7   76.59   21.05
  -1 -13  -8   11.06   13.53
   1  13   8   15.71   12.47
  -1 -13  -9    4.23   11.70
   1  13   9   11.48   13.83
  -1 -13 -10   -2.05   10.67
   1  13  10    6.32   14.43
  -1 -13 -11   -6.66   10.12
   1  13  11    3.03   12.72
  -1 -13 -12    4.57   12.51
   1  13  12   -9.56   11.31
  -1 -13 -13   24.16   18.19
   1  13  13   13.23   15.20
  -1 -13 -14    2.52   14.90
   1  13  14   13.62   16.95
  -1 -13 -15    4.65   12.89
   1  13  15   -0.13   15.33
  -1 -13 -16   48.20   23.31
   1  13  16   30.78   19.64
   1  13  17   12.08   16.95
   1  14  -9    2.39   14.09
  -1 -14   8   14.73   15.88
   1  14  -8   -1.84   10.76
  -1 -14   7    9.65   13.75
   1  14  -7   13.41   15.54
  -1 -14   6    5.85   12.94
   1  14  -6   -3.80   11.19
  -1 -14   5   10.84   14.05
   1  14  -5    2.43   11.23
  -1 -14   4    6.53   12.17
   1  14  -4    3.67   10.54
  -1 -14   3   38.42   17.20
   1  14  -3   46.71   16.31
  -1 -14   2    2.52   11.44
   1  14  -2    1.92   11.91
   1  14  -2    0.81    9.65
  -1 -14   1   70.44   20.53
   1  14  -1   98.87   23.65
  -1 -14   0   23.10   14.69
   1  14   0   34.54   17.76
  -1 -14  -1   84.15   22.11
   1  14   1   93.79   23.52
  -1 -14  -2    7.26   12.94
   1  14   2    6.15   13.87
  -1 -14  -3   61.48   20.15
   1  14   3   50.33   18.70
  -1 -14  -4   27.79   15.33
   1  14   4   23.40   14.81
  -1 -14  -5    2.95   10.93
   1  14   5    8.41   14.77
  -1 -14  -6   58.49   20.58
   1  14   6   35.56   17.80
  -1 -14  -7    4.40   13.62
   1  14   7   -1.84   11.83
  -1 -14  -8   -4.99   10.72
   1  14   8  -10.54    9.69
  -1 -14  -9    9.86   14.39
   1  14   9   11.48   15.63
  -1 -14 -10   -6.32    9.78
   1  14  10    6.53   12.59
  -1 -14 -11   -3.20   12.00
   1  14  11    2.09   14.09
  -1 -14 -12   -7.04   13.70
   1  14  12   -0.47   15.58
  -1 -14 -13   -0.09   13.49
   1  14  13    0.68   15.20
  -1 -14 -14   27.37   18.06
   1  14  14    5.21   15.84
   1  14  15    1.88   15.75
  -1 -15   7    6.87   24.12
   1  15  -7   -2.99   12.08
  -1 -15   6    9.52   14.17
   1  15  -6   12.85   15.20
  -1 -15   5   11.61   15.45
   1  15  -5   -2.13   12.55
  -1 -15   4   22.75   16.22
   1  15  -4    6.49   12.12
  -1 -15   3    4.14   14.81
  -1 -15   2   26.73   18.10
   1  15  -2   40.94   22.16
  -1 -15   1    3.88   12.68
   1  15  -1   19.51   17.80
  -1 -15   0   49.05   18.53
   1  15   0   62.03   21.30
  -1 -15  -1  -13.28   11.01
   1  15   1    7.68   14.90
  -1 -15  -2   75.78   22.88
   1  15   2   49.78   19.42
  -1 -15  -3   45.34   18.74
   1  15   3   39.75   19.30
  -1 -15  -4   13.02   13.62
   1  15   4   24.33   17.03
  -1 -15  -5   24.80   16.39
   1  15   5   38.21   18.53
  -1 -15  -6    2.52   13.02
   1  15   6    1.75   13.23
  -1 -15  -7    3.80   12.25
   1  15   7    1.92   14.47
  -1 -15  -8   13.32   15.92
   1  15   8   12.51   16.22
  -1 -15  -9   15.71   17.89
   1  15   9   24.51   19.81
  -1 -15 -10    6.62   15.16
   1  15  10    9.52   18.96
  -1 -15 -11   16.35   16.61
   1  15  11   -3.84   12.34
  -1 -15 -12    9.09   18.02
   1  15  12   -1.02   14.00
  -1 -15 -13   -3.42   14.90
   1  15  13    4.31   15.92
   1  16  -6   18.83   15.97
  -1 -16   5    9.22   17.50
  -1 -16   4   -2.90   14.39
  -1 -16   3  -10.16   13.53
  -1 -16   2    0.47   14.64
  -1 -16   1   19.60   16.31
   1  16  -1   -0.94   15.54
  -1 -16   0   15.50   16.95
   1  16   0   15.28   18.87
  -1 -16  -1    3.16   13.58
   1  16   1   -4.40   13.92
  -1 -16  -2   37.36   19.60
   1  16   2   30.99   20.83
  -1 -16  -3   -4.91   14.13
   1  16   3   16.48   17.59
  -1 -16  -4   33.94   19.13
   1  16   4   39.23   23.01
  -1 -16  -5  -11.74   12.98
   1  16   5   -3.29   17.42
  -1 -16  -6   -3.33   13.19
   1  16   6  -16.74   15.24
  -1 -16  -7   -1.96   14.43
   1  16   7   -7.13   13.02
  -1 -16  -8   63.31   23.82
   1  16   8   52.38   24.46
  -1 -16  -9   -6.96   12.12
   1  16   9   11.78   18.83
  -1 -16 -10   31.93   18.14
   1  16  10   23.05   23.40
  -1 -17   3    9.95   16.99
  -1 -17   2    4.91   16.86
  -1 -17   1   17.03   19.13
  -1 -17   0   -1.79   15.84
   1  17   0    1.58   19.00
  -1 -17  -1   42.18   21.60
   1  17   1   23.82   19.72
  -1 -17  -2    6.57   16.74
   1  17   2   -0.73   17.97
  -1 -17  -3   35.82   19.72
   1  17   3   25.96   21.09
  -1 -17  -4   -8.79   14.52
   1  17   4   18.53   18.23
  -1 -17  -5   -4.91   16.27
   1  17   5   10.08   18.36
  -1 -17  -6    6.15   13.53
   1  17   6    6.70   18.83
  -1 -17  -7   12.25   19.94
  -2  16   4  -23.10   16.48
  -2  16   3   -6.62   18.40
  -2  16   2  -13.83   16.91
  -2  16   1   17.16   21.18
  -2  16   0    5.04   20.79
  -2  15   8   -8.84   17.55
   2 -15  -8    7.34   16.78
  -2  15   7    1.96   16.14
   2 -15  -7  -11.10   15.75
  -2  15   6   -8.71   15.20
   2 -15  -6   63.18   22.50
  -2  15   5   16.27   17.03
   2 -15  -5    3.37   16.27
  -2  15   4   11.27   18.02
   2 -15  -4   13.53   17.12
  -2  15   3  -18.70   13.66
   2 -15  -3   -0.98   16.65
  -2  15   2   -0.94   15.75
   2 -15  -2   17.16   18.06
  -2  15   1   13.15   15.41
   2 -15  -1   18.74   17.93
  -2  15   0  -18.02   12.47
   2 -15   0   -2.48   13.19
  -2  15  -1   -0.38   18.02
   2 -15   1   -3.20   15.45
   2 -15   2    7.39   17.50
   2 -15   3   -4.31   15.37
   2 -15   4   -5.85   15.63
   2 -15   5    8.32   17.93
  -2  14  11   -3.59   13.87
   2 -14 -11    7.04   18.27
  -2  14  10    9.31   16.74
   2 -14 -10   -5.85   14.56
  -2  14   9    3.46   14.34
   2 -14  -9   12.98   16.48
  -2  14   8   -6.15   13.58
   2 -14  -8   14.90   16.35
  -2  14   7   22.58   18.53
   2 -14  -7   36.03   21.26
  -2  14   6   -2.05   17.08
   2 -14  -6  -13.96   11.74
  -2  14   5    4.53   18.44
   2 -14  -5    8.41   17.50
  -2  14   4    5.25   16.01
   2 -14  -4    6.75   14.90
  -2  14   3  -10.37   14.64
   2 -14  -3   13.45   16.35
  -2  14   2    7.51   16.65
   2 -14  -2    1.28   12.81
  -2  14   1    5.08   14.09
   2 -14  -1   -5.68   11.95
  -2  14   0    1.62   16.82
   2 -14   0    0.38   12.89
  -2  14  -1  -18.70   14.56
   2 -14   1   10.72   15.84
  -2  14  -2   11.01   17.72
   2 -14   2   49.39   20.92
   2 -14   3   -7.86   15.11
   2 -14   4  -16.44   12.98
   2 -14   5   -2.69   14.64
   2 -14   6    7.43   14.39
   2 -14   7    3.24   16.39
   2 -14   8   -2.56   13.28
  -2  13  13   26.98   18.23
   2 -13 -13    0.77   13.32
  -2  13  12    6.32   17.08
   2 -13 -12   11.83   15.16
  -2  13  11    2.86   13.66
   2 -13 -11   -2.13   13.53
  -2  13  10   42.73   22.24
   2 -13 -10   37.10   20.11
  -2  13   9   13.92   17.50
   2 -13  -9   19.98   15.80
  -2  13   8   80.09   23.78
   2 -13  -8   61.18   21.26
  -2  13   7   16.95   14.05
   2 -13  -7   -3.33   12.08
  -2  13   6   38.34   18.70
   2 -13  -6   17.85   16.61
  -2  13   5    6.15   14.26
   2 -13  -5   -3.59   12.94
  -2  13   4    5.51   14.13
   2 -13  -4  -10.03   12.21
  -2  13   3   -1.79   11.36
   2 -13  -3    3.20   14.26
  -2  13   2   -4.23   11.36
   2 -13  -2    1.96   12.47
  -2  13   1    0.17   13.19
   2 -13  -1   14.77   16.27
  -2  13   0    0.64   12.34
   2 -13   0    3.16   12.38
  -2  13  -1   16.44   14.22
   2 -13   1   15.11   14.69
  -2  13  -2   -1.75   11.36
   2 -13   2   -9.35   12.08
   2 -13   3   21.18   14.52
   2 -13   4    3.80   13.15
   2 -13   5    8.71   14.56
   2 -13   6   15.24   14.05
   2 -13   7   24.76   16.31
   2 -13   8   -1.92   13.62
   2 -13   9   30.99   19.25
   2 -13  10   -6.75   13.49
  -2  12  15    1.96   14.17
   2 -12 -15   -3.54   13.53
  -2  12  14    2.56   14.64
   2 -12 -14    4.53   15.50
  -2  12  13    4.78   13.28
   2 -12 -13   10.29   13.11
  -2  12  12    6.49   13.23
   2 -12 -12    7.26   12.25
  -2  12  11   41.41   18.87
   2 -12 -11   15.24   14.86
  -2  12  10   67.58   22.37
   2 -12 -10   62.84   19.94
  -2  12   9   36.63   17.55
   2 -12  -9   56.65   20.75
  -2  12   8   47.64   19.04
   2 -12  -8   59.09   20.71
  -2  12   7   36.42   18.70
   2 -12  -7   33.60   16.44
  -2  12   6    8.58   11.87
   2 -12  -6   10.93   13.87
  -2  12   5    2.09   11.91
   2 -12  -5    9.43   12.08
  -2  12   4    1.79   10.93
   2 -12  -4   -4.01    7.86
   2 -12  -4    0.47   12.04
  -2  12   3    9.52   11.27
   2 -12  -3   -3.16    8.75
  -2  12   2   -2.09   10.46
   2 -12  -2   -8.32    8.58
  -2  12   1   -4.48   10.33
   2 -12  -1   -6.49    8.32
  -2  12   0    5.76   11.27
   2 -12   0    5.25   10.89
  -2  12  -1   -6.96    8.97
   2 -12   1   -3.97   11.74
  -2  12  -2    5.29   11.23
   2 -12   2   -1.79    9.31
  -2  12  -3    5.42   11.23
   2 -12   3    8.71   12.47
   2 -12   4    5.46   11.65
   2 -12   5   55.03   19.81
   2 -12   6   17.97   15.24
   2 -12   7   -1.66   10.37
  -2  12  -8    3.54   13.66
   2 -12   8    4.78   13.96
  -2  12  -9    6.19   14.64
   2 -12   9    4.70   14.09
  -2  12 -10   10.37   15.28
   2 -12  10   17.55   15.63
  -2  12 -11    8.15   14.81
   2 -12  11   -0.64   13.96
   2 -12  12    9.52   16.35
  -2  11  17   25.10   17.72
  -2  11  16   10.08   13.70
   2 -11 -16   12.94   15.37
  -2  11  15   28.43   16.95
   2 -11 -15    9.90   13.02
  -2  11  14   -4.70   12.85
   2 -11 -14    6.53   13.96
  -2  11  13   -2.13   12.64
   2 -11 -13   -0.64   10.42
  -2  11  12   12.76   14.22
   2 -11 -12   20.83   16.39
  -2  11  11   67.20   21.22
   2 -11 -11   29.03   16.05
  -2  11  10   18.36   14.43
   2 -11 -10    4.53   11.06
  -2  11   9  110.40   25.15
   2 -11  -9  106.56   23.52
  -2  11   8   15.92   14.22
   2 -11  -8    8.75   11.31
  -2  11   7    9.35   12.47
   2 -11  -7   16.22   12.89
  -2  11   6    5.76   11.57
   2 -11  -6   23.40   10.50
   2 -11  -6   11.27   11.65
  -2  11   5  111.98   23.40
   2 -11  -5   94.73   17.08
   2 -11  -5   98.02   21.09
  -2  11   4   11.61   11.91
   2 -11  -4    9.86    8.84
   2 -11  -4    3.67   10.16
  -2  11   3   39.96   15.71
   2 -11  -3   47.86   16.69
  -2  11   2   20.71   13.79
   2 -11  -2    4.27   10.37
  -2  11   1   -4.06   11.01
   2 -11  -1    9.14   11.61
  -2  11   0   20.71   13.06
   2 -11   0   25.40   13.11
  -2  11  -1   72.24   18.36
   2 -11   1   79.71   19.89
  -2  11  -2    1.75   10.46
   2 -11   2   12.98   11.61
  -2  11  -3   69.97   17.20
   2 -11   3   90.55   21.64
  -2  11  -4    7.30    9.86
   2 -11   4   16.44   12.38
   2 -11   5    7.39   13.06
   2 -11   6   47.17   17.08
  -2  11  -7   47.47   18.23
   2 -11   7   45.64   16.99
  -2  11  -8   14.69   14.17
   2 -11   8    6.45   12.34
  -2  11  -9   22.75   14.94
   2 -11   9    3.71   13.23
  -2  11 -10   48.58   18.57
   2 -11  10   42.52   19.04
  -2  11 -11    0.04   12.00
   2 -11  11   -2.01   12.04
  -2  11 -12   16.22   14.90
   2 -11  12   13.32   15.41
   2 -11  13    8.37   15.03
   2 -11  14   10.12   16.65
  -2  10  18   19.94   14.81
  -2  10  17    3.37   11.01
   2 -10 -17   -5.42   12.55
  -2  10  16    3.59   13.15
   2 -10 -16   -5.04   12.17
  -2  10  15    4.91   12.76
   2 -10 -15   20.53   14.73
  -2  10  14    0.26   10.59
   2 -10 -14   20.49   15.45
  -2  10  13   71.59   22.20
   2 -10 -13   55.29   18.78
  -2  10  12   32.10   15.50
   2 -10 -12   11.48   11.95
  -2  10  11   24.80   14.73
   2 -10 -11    2.05    9.61
  -2  10  10   63.40   19.13
   2 -10 -10   67.03   19.00
  -2  10   9   26.43   15.20
   2 -10  -9   17.76   12.81
  -2  10   8   19.30   13.06
   2 -10  -8   17.76   11.87
  -2  10   7  102.46   21.60
   2 -10  -7  156.89   17.38
   2 -10  -7  150.32   26.51
  -2  10   6  126.28   24.12
   2 -10  -6  102.38   16.52
   2 -10  -6   95.80   20.79
  -2  10   5   75.18   18.78
   2 -10  -5   59.90   13.66
   2 -10  -5   76.59   17.97
  -2  10   4  189.89   23.35
   2 -10  -4  142.08   17.72
   2 -10  -4  216.45   25.40
  -2  10   3    2.77    9.01
   2 -10  -3   -0.68    8.15
  -2  10   2   85.47   18.06
   2 -10  -2   94.22   20.45
  -2  10   1    2.69    8.15
   2 -10  -1    5.59    8.88
  -2  10   0    2.13    7.56
   2 -10   0   -1.49    7.34
  -2  10  -1    1.62    8.28
   2 -10   1    0.85    7.94
  -2  10  -2   -8.92    8.15
   2 -10   2    1.96    9.26
  -2  10  -3  -10.89   10.08
   2 -10   3   -8.54    8.15
  -2  10  -4   78.72   15.88
   2 -10   4  106.60   21.18
  -2  10  -5   -2.99    7.77
  -2  10  -5    5.12   10.37
   2 -10   5   -2.18    8.07
  -2  10  -6   62.71   17.38
   2 -10   6   96.87   20.75
  -2  10  -7   20.19   13.87
   2 -10   7    4.35   11.44
  -2  10  -8   68.09   18.87
   2 -10   8   65.36   18.66
  -2  10  -9   73.09   20.41
   2 -10   9   73.99   20.75
  -2  10 -10   -1.15   11.31
   2 -10  10    0.68   10.76
  -2  10 -11   17.38   13.58
   2 -10  11   36.97   17.63
  -2  10 -12    1.32   12.42
   2 -10  12    6.75   11.57
  -2  10 -13   -1.88    9.99
   2 -10  13   -0.85   12.00
  -2  10 -14   27.49   19.64
   2 -10  14   -3.03   13.53
   2 -10  15    6.32   16.01
   2  -9 -18   -8.75   12.12
  -2   9  17   -2.56   10.63
   2  -9 -17    3.84   13.02
  -2   9  16   -2.09   10.89
   2  -9 -16   -5.21   10.29
  -2   9  15   17.03   13.49
   2  -9 -15    1.96   11.74
  -2   9  14   45.55   16.95
   2  -9 -14   28.90   14.17
  -2   9  13   52.00   18.61
   2  -9 -13   83.21   21.05
  -2   9  12   16.91   12.64
   2  -9 -12   13.49   11.91
  -2   9  11   77.83   19.94
   2  -9 -11   97.55   21.39
  -2   9  10   30.23   15.07
   2  -9 -10   21.94   11.74
  -2   9   9   30.74   13.66
   2  -9  -9   39.70   10.67
   2  -9  -9   23.10   12.21
  -2   9   8  106.18   21.47
   2  -9  -8  108.99   16.52
   2  -9  -8   85.81   19.72
  -2   9   7   38.47   14.69
   2  -9  -7   37.10   10.89
   2  -9  -7   58.36   17.29
  -2   9   6  245.95   27.32
   2  -9  -6  296.58   21.90
   2  -9  -6  215.89   24.12
  -2   9   5   25.70   12.98
   2  -9  -5   28.86    9.78
   2  -9  -5   31.38   12.25
  -2   9   4   -1.96    6.92
   2  -9  -4   -2.43    5.72
   2  -9  -4   -2.82    7.68
  -2   9   3   17.33    9.69
   2  -9  -3   23.27   11.31
  -2   9   2   24.80   11.44
   2  -9  -2   33.04   12.08
  -2   9   1   26.51   11.78
   2  -9  -1   32.32   11.87
  -2   9   0   60.28   14.60
   2  -9   0   60.96   15.03
  -2   9  -1    9.43    8.20
   2  -9   1    5.64    8.84
  -2   9  -2   67.75   14.43
   2  -9   2   67.28   16.86
  -2   9  -3  -10.50    8.88
   2  -9   3    6.83    9.35
  -2   9  -4   19.68    9.35
  -2   9  -4    7.73    8.11
   2  -9   4   10.84   10.72
  -2   9  -5   46.02   11.78
  -2   9  -5   42.91   15.03
   2  -9   5   55.93   15.84
  -2   9  -6  256.28   27.19
   2  -9   6  218.11   25.79
  -2   9  -7   72.06   18.83
   2  -9   7   43.16   14.81
  -2   9  -8  239.25   28.43
   2  -9   8  243.94   27.07
  -2   9  -9    2.09   10.16
   2  -9   9    8.97   11.65
  -2   9 -10   53.15   17.42
   2  -9  10   64.29   19.38
  -2   9 -11   -1.37   10.03
   2  -9  11    0.30    9.61
  -2   9 -12   -0.98    9.39
   2  -9  12    9.82   11.40
  -2   9 -13   10.46   13.02
   2  -9  13    6.62   12.51
  -2   9 -14   -6.45   10.84
   2  -9  14   -1.75   11.19
  -2   9 -15   18.31   15.37
   2  -9  15    4.78   13.49
   2  -9  16   -2.95   13.02
   2  -8 -19   -4.53   13.62
   2  -8 -18    3.93   13.23
  -2   8  17    1.45   10.29
   2  -8 -17   -5.51   11.44
  -2   8  16   33.77   16.39
   2  -8 -16   19.08   14.52
  -2   8  15   19.30   12.81
   2  -8 -15   11.36   11.65
  -2   8  14   66.39   19.08
   2  -8 -14   77.49   21.00
  -2   8  13    9.09    9.90
   2  -8 -13    4.27   10.76
  -2   8  12   16.95   12.00
   2  -8 -12   23.48   12.76
  -2   8  11   15.58   11.48
   2  -8 -11   11.06   10.80
  -2   8  10  109.63   22.33
   2  -8 -10  142.25   16.39
   2  -8 -10  121.80   22.29
  -2   8   9  248.00   25.44
   2  -8  -9  232.16   19.17
   2  -8  -9  209.83   23.95
  -2   8   8   31.12   13.70
   2  -8  -8   22.75    8.28
   2  -8  -8    9.56    9.05
  -2   8   7  147.03   22.97
   2  -8  -7  153.78   15.88
   2  -8  -7  138.37   21.73
  -2   8   6  -11.31    7.43
   2  -8  -6    8.37    6.23
   2  -8  -6    0.60    8.11
  -2   8   5    0.98    6.87
   2  -8  -5   -2.35    5.29
   2  -8  -5   -1.11    6.66
  -2   8   4   43.76   12.64
   2  -8  -4   35.56    9.99
   2  -8  -4   36.46   11.91
  -2   8   3    4.95    7.09
   2  -8  -3    6.57    7.04
  -2   8   2   92.00   16.95
   2  -8  -2   79.36   15.67
  -2   8   1   81.50   15.28
   2  -8  -1   55.50   13.19
  -2   8   0    6.75    7.17
   2  -8   0    2.48    6.28
  -2   8  -1  139.01   16.39
   2  -8   1  143.70   20.58
  -2   8  -2   87.90   14.56
   2  -8   2  111.00   18.49
  -2   8  -3    7.77    7.68
   2  -8   3   12.94    8.75
  -2   8  -4    9.05    8.11
  -2   8  -4    8.84    8.62
   2  -8   4   11.74    9.39
  -2   8  -5  100.63   14.47
  -2   8  -5  116.17   20.75
   2  -8   5  107.11   18.83
  -2   8  -6   -9.86    6.45
  -2   8  -6   -5.04    6.06
   2  -8   6    4.27    8.67
  -2   8  -7  290.65   27.07
   2  -8   7  252.14   25.32
  -2   8  -8   13.32    9.73
   2  -8   8   -3.12    9.52
  -2   8  -9  237.24   26.43
   2  -8   9  211.84   24.97
  -2   8 -10   96.01   22.20
   2  -8  10   73.86   18.10
  -2   8 -11   -3.71    8.41
   2  -8  11    6.96   10.54
  -2   8 -12    6.36   11.40
   2  -8  12   17.03   12.34
  -2   8 -13    1.92    8.97
   2  -8  13    7.26   11.74
  -2   8 -14    4.99   10.37
   2  -8  14    5.68   11.57
  -2   8 -15    3.63   10.54
   2  -8  15   -2.60   12.17
  -2   8 -16    1.66   12.21
   2  -8  16   -6.02   10.67
   2  -8  17  -14.34    9.78
   2  -7 -19   -0.60   12.64
   2  -7 -18    6.96   11.91
   2  -7 -17   14.69   14.05
  -2   7  16   48.88   17.33
   2  -7 -16   27.79   14.43
  -2   7  15    6.36   10.76
   2  -7 -15    2.65   10.50
  -2   7  14   -1.28    8.50
   2  -7 -14   -2.26    9.61
  -2   7  13   11.70   10.25
   2  -7 -13    3.63    9.69
  -2   7  12  118.85   22.71
   2  -7 -12  136.87   16.56
   2  -7 -12  109.85   20.75
  -2   7  11   19.30   12.21
   2  -7 -11   19.51    8.97
   2  -7 -11   10.08    9.43
  -2   7  10  658.35   38.21
   2  -7 -10  688.20   31.29
   2  -7 -10  636.50   37.31
  -2   7   9   78.72   17.29
   2  -7  -9   99.90   14.98
   2  -7  -9   75.18   16.48
  -2   7   8  176.83   25.23
   2  -7  -8  241.30   18.61
   2  -7  -8  213.03   22.24
  -2   7   7    5.17    7.68
   2  -7  -7   11.74    6.70
   2  -7  -7    2.39    7.26
  -2   7   6    2.05    6.66
   2  -7  -6    4.74    5.68
   2  -7  -6    3.12    6.53
  -2   7   5   27.15   10.63
   2  -7  -5   34.37    9.26
   2  -7  -5   23.86    9.73
  -2   7   4   66.56   14.09
   2  -7  -4   78.94   13.06
   2  -7  -4   56.82   12.68
  -2   7   3   56.05   12.76
   2  -7  -3   42.95    9.78
   2  -7  -3   62.63   13.87
  -2   7   2   67.28   13.19
   2  -7  -2   56.44   12.51
  -2   7   1  222.85   19.38
   2  -7  -1  227.21   19.94
  -2   7   0  160.48   15.97
   2  -7   0  142.34   16.44
  -2   7  -1   33.68    9.78
   2  -7   1   27.92   10.12
  -2   7  -2   12.00    6.75
   2  -7   2    8.88    7.98
  -2   7  -3   44.40   10.84
  -2   7  -3   40.86   11.10
   2  -7   3   38.17   11.27
  -2   7  -4    1.88    5.21
  -2   7  -4    0.13    5.93
   2  -7   4   -0.09    5.85
  -2   7  -5   25.96    7.77
  -2   7  -5   16.39    9.78
   2  -7   5   19.25    9.05
  -2   7  -6   62.29   10.93
  -2   7  -6   72.19   15.75
   2  -7   6   39.23   11.70
  -2   7  -7  197.96   13.92
  -2   7  -7  219.35   23.35
   2  -7   7  170.26   20.15
  -2   7  -8   59.81   15.71
   2  -7   8   29.76   11.95
  -2   7  -9  431.53   33.34
   2  -7   9  370.70   30.57
  -2   7 -10   14.81   11.23
   2  -7  10   18.31   11.40
  -2   7 -11  215.98   26.94
   2  -7  11  134.10   22.67
  -2   7 -12   -3.12    7.47
   2  -7  12   -4.87    7.21
  -2   7 -13    0.55    9.22
   2  -7  13    6.79   11.44
  -2   7 -14    0.04    9.82
   2  -7  14    4.18   10.76
  -2   7 -15   -1.45    9.31
   2  -7  15    3.84   10.97
  -2   7 -16    0.09   11.48
   2  -7  16    4.91   12.00
  -2   7 -17   -1.54   11.65
   2  -7  17    1.66   12.76
   2  -7  18    5.51   14.05
   2  -6 -20   -3.63   10.59
   2  -6 -19    6.87   12.30
   2  -6 -18    5.59   11.53
   2  -6 -17   27.19   14.26
  -2   6  16   29.71   13.53
   2  -6 -16   17.85   13.19
  -2   6  15    3.16    9.09
   2  -6 -15    4.35    9.65
  -2   6  14    5.64    9.18
   2  -6 -14    2.43    8.11
  -2   6  13  145.03   23.52
   2  -6 -13  144.90   20.15
   2  -6 -13  150.70   24.42
  -2   6  12   34.03   13.32
   2  -6 -12   16.31    9.14
   2  -6 -12   26.51   12.55
  -2   6  11  201.93   22.93
   2  -6 -11  198.95   18.57
   2  -6 -11  223.92   23.78
  -2   6  10   -1.54    7.56
   2  -6 -10   -0.38    5.46
   2  -6 -10    2.09    6.62
  -2   6   9  153.05   22.41
   2  -6  -9  135.08   15.07
   2  -6  -9  111.90   17.89
  -2   6   8  138.32   20.83
   2  -6  -8  170.85   15.28
   2  -6  -8  146.65   18.14
  -2   6   7    5.76    7.34
   2  -6  -7    8.11    6.15
   2  -6  -7    4.31    6.28
  -2   6   6   46.96   12.08
   2  -6  -6   65.75   11.48
   2  -6  -6   56.10   13.23
  -2   6   5    4.35    6.28
   2  -6  -5    2.05    4.82
   2  -6  -5    4.14    6.28
  -2   6   4   97.21   16.35
   2  -6  -4   93.58   13.23
   2  -6  -4   78.94   13.62
  -2   6   3    6.75    6.23
   2  -6  -3    5.25    5.38
   2  -6  -3    8.54    6.83
  -2   6   2   23.99    9.05
   2  -6  -2   13.96    7.21
  -2   6   1   -1.07    5.25
   2  -6  -1   -0.26    5.46
  -2   6   0   26.90    8.62
   2  -6   0   10.89    7.13
  -2   6  -1  163.30   14.52
   2  -6   1  154.59   16.09
  -2   6  -2    2.77    5.17
   2  -6   2    6.10    6.45
  -2   6  -3  432.43   21.18
  -2   6  -3  448.99   25.91
   2  -6   3  437.25   26.13
  -2   6  -4   28.13    7.60
  -2   6  -4   33.47   10.72
   2  -6   4   18.31    7.98
  -2   6  -5   38.42    7.90
  -2   6  -5   46.53   12.17
   2  -6   5   31.59   10.08
  -2   6  -6   18.66    5.98
  -2   6  -6   16.48    8.58
   2  -6   6    9.26    8.28
  -2   6  -7    0.73    3.42
  -2   6  -7    0.13    5.46
   2  -6   7    5.59    6.75
  -2   6  -8  156.51   23.14
   2  -6   8  115.06   18.96
  -2   6  -9   -1.41    6.02
   2  -6   9   -3.12    7.51
  -2   6 -10  518.88   35.86
   2  -6  10  560.21   36.07
  -2   6 -11   76.16   18.74
   2  -6  11   46.66   14.30
  -2   6 -12   77.32   20.11
   2  -6  12   47.26   15.50
  -2   6 -13   20.15   13.49
   2  -6  13   17.59   12.25
  -2   6 -14   -2.82    9.01
   2  -6  14   -2.90    8.32
  -2   6 -15   -4.27    8.45
   2  -6  15    6.62   11.10
  -2   6 -16    4.31   11.57
   2  -6  16    8.71   12.38
  -2   6 -17    1.45   11.70
   2  -6  17    1.96   11.53
  -2   6 -18   -3.84   10.54
   2  -6  18   -9.90    9.73
   2  -6  19   -4.10   13.49
   2  -5 -20    2.01   13.58
   2  -5 -19    8.20   11.53
   2  -5 -18   -0.43    9.95
   2  -5 -17   -1.71    9.43
   2  -5 -16    7.00   10.16
  -2   5  15    3.84    8.67
   2  -5 -15   -3.59    7.04
  -2   5  14   52.68   14.69
   2  -5 -14   89.14   17.12
   2  -5 -14   72.36   18.19
  -2   5  13    8.32    8.15
   2  -5 -13    3.33    7.26
   2  -5 -13    3.03    7.98
  -2   5  12  153.44   22.84
   2  -5 -12  125.98   18.27
   2  -5 -12  130.51   21.30
  -2   5  11  114.59   18.87
   2  -5 -11  128.08   17.72
   2  -5 -11  102.72   18.31
  -2   5  10   52.81   13.45
   2  -5 -10   42.39   10.80
   2  -5 -10   50.76   13.15
  -2   5   9   34.54   10.59
   2  -5  -9   36.89    9.82
   2  -5  -9   31.42    9.90
  -2   5   8   -3.93    6.62
   2  -5  -8    4.14    5.34
   2  -5  -8    2.73    5.89
  -2   5   7  911.01   37.06
   2  -5  -7 1006.30   33.17
   2  -5  -7  857.51   35.39
  -2   5   6   22.84    8.45
   2  -5  -6   21.99    7.39
   2  -5  -6   23.14    8.28
  -2   5   5  425.13   24.59
   2  -5  -5  393.19   20.28
   2  -5  -5  390.80   23.40
  -2   5   4   72.96   13.11
   2  -5  -4   76.76   11.48
   2  -5  -4   64.59   11.44
  -2   5   3  683.24   29.03
   2  -5  -3  498.05   22.11
   2  -5  -3  681.32   28.69
  -2   5   2  118.26   15.92
   2  -5  -2  120.95   15.80
  -2   5   1   15.50    9.73
   2  -5  -1   22.97    8.97
  -2   5   0   -7.17    5.89
   2  -5   0   15.63    8.79
  -2   5  -1   -4.74    4.65
   2  -5   1    0.09    5.72
  -2   5  -2  955.11   29.24
   2  -5   2 1034.09   35.35
  -2   5  -3   11.83    6.79
  -2   5  -3   12.47    6.57
   2  -5   3    4.18    6.36
  -2   5  -4  193.10   13.02
  -2   5  -4  215.38   17.72
   2  -5   4  185.58   17.38
  -2   5  -5   50.72    7.98
  -2   5  -5   46.83   10.80
   2  -5   5   43.03   11.06
  -2   5  -6   62.71    7.26
  -2   5  -6   63.57   13.02
   2  -5   6   54.35   12.38
  -2   5  -7   43.89    6.49
  -2   5  -7   51.87   12.51
   2  -5   7   34.37   10.16
  -2   5  -8   55.93    5.29
  -2   5  -8   57.25   13.36
   2  -5   8   46.58   12.51
  -2   5  -9  311.91   25.83
   2  -5   9  294.02   24.85
  -2   5 -10   89.48   17.67
   2  -5  10  124.06   20.07
  -2   5 -11   69.50   17.08
   2  -5  11   74.97   17.50
  -2   5 -12  145.07   24.51
   2  -5  12  131.58   22.20
  -2   5 -13   15.07   11.06
   2  -5  13   17.38   12.25
  -2   5 -14   37.44   15.80
   2  -5  14   11.83   10.16
  -2   5 -15   11.36   11.70
   2  -5  15    4.18   11.36
  -2   5 -16   -1.66    9.18
   2  -5  16    5.72   10.80
  -2   5 -17    0.81   11.06
   2  -5  17   -1.07   10.89
  -2   5 -18   -1.62    9.52
   2  -5  18   -1.07   10.76
  -2   5 -19    1.49   11.53
   2  -5  19   -1.28   11.61
   2  -5  20  -11.36   20.83
   2  -4 -19   -1.79   10.50
   2  -4 -18    8.41   11.31
   2  -4 -17   -0.85    8.79
   2  -4 -16    1.37    9.73
   2  -4 -16    1.32    9.35
  -2   4  15   91.28   17.59
   2  -4 -15   98.36   18.91
   2  -4 -15  116.46   21.56
  -2   4  14    7.39    7.81
   2  -4 -14    0.94    7.90
   2  -4 -14   -4.40    7.47
  -2   4  13  164.32   19.42
   2  -4 -13  176.53   20.36
   2  -4 -13  147.25   21.73
  -2   4  12   54.48   13.83
   2  -4 -12   75.31   15.07
   2  -4 -12   54.52   13.83
  -2   4  11   22.37    9.39
   2  -4 -11   13.19    8.41
   2  -4 -11   18.53    9.35
  -2   4  10   44.19   11.44
   2  -4 -10   45.55   11.23
   2  -4 -10   37.06   11.14
  -2   4   9  408.22   25.27
   2  -4  -9  409.89   23.01
   2  -4  -9  431.40   26.04
  -2   4   8  892.61   35.48
   2  -4  -8  905.16   32.10
   2  -4  -8  812.22   33.81
  -2   4   7   22.29    8.28
   2  -4  -7   11.74    6.19
   2  -4  -7   16.61    6.96
  -2   4   6 1324.14   40.90
   2  -4  -6 1337.33   35.78
   2  -4  -6 1220.74   38.38
  -2   4   5    2.69    5.68
   2  -4  -5    1.62    4.57
   2  -4  -5   -2.56    4.01
  -2   4   4  296.07   20.71
   2  -4  -4  264.14   15.88
   2  -4  -4  292.36   18.57
  -2   4   3  662.33   26.73
   2  -4  -3  565.07   22.16
   2  -4  -3  559.91   23.99
  -2   4   2  755.95   27.41
   2  -4  -2  801.46   27.96
  -2   4   1   28.30    7.81
   2  -4  -1   26.55    7.39
  -2   4   0   10.03    5.29
   2  -4   0   13.15    5.93
  -2   4  -1   48.75    8.62
   2  -4   1   45.68    8.97
  -2   4  -2  274.68   14.90
   2  -4   2  265.16   17.25
  -2   4  -3  385.21   18.02
  -2   4  -3  410.53   21.35
  -2   4  -4  720.30   21.05
  -2   4  -4  722.48   29.07
   2  -4   4  735.37   29.33
  -2   4  -5  150.83   10.20
  -2   4  -5  157.49   15.63
   2  -4   5  134.05   14.69
  -2   4  -6  551.54   15.63
  -2   4  -6  624.20   29.46
   2  -4   6  578.52   28.48
  -2   4  -7   94.31    6.10
  -2   4  -7  103.57   16.74
   2  -4   7   84.02   14.13
  -2   4  -8   70.66   14.90
   2  -4   8   54.52   12.08
  -2   4  -9    5.89    6.45
   2  -4   9   -2.35    6.19
  -2   4 -10   28.43   11.14
  -2   4 -10   23.10    9.90
   2  -4  10   24.46   10.20
  -2   4 -11  126.20   21.64
  -2   4 -11  118.56   19.25
   2  -4  11   72.66   15.28
  -2   4 -12  120.09   20.66
  -2   4 -12  106.39   19.64
   2  -4  12   82.52   18.23
  -2   4 -13  223.96   24.80
  -2   4 -13  214.78   24.21
   2  -4  13  150.28   23.05
  -2   4 -14   87.43   20.02
  -2   4 -14   79.45   18.70
   2  -4  14   96.44   20.83
  -2   4 -15   11.23   10.76
  -2   4 -15   17.25   12.47
   2  -4  15    5.34   10.93
  -2   4 -16   -4.40    8.15
  -2   4 -16   -3.93    9.09
   2  -4  16   -2.48    7.51
  -2   4 -17    2.22    8.92
  -2   4 -17    1.24    9.52
   2  -4  17   -6.36    9.05
  -2   4 -18    5.64   11.95
  -2   4 -18    3.20   11.31
   2  -4  18   11.06   13.15
  -2   4 -19   13.19   13.87
  -2   4 -19   -8.54   11.61
   2  -4  19   12.47   14.26
  -2   4 -20   -0.17   12.47
  -2   4 -20   -9.90   11.65
   2  -4  20   -2.13   13.75
   2  -3 -19    9.65   11.48
   2  -3 -18   19.30   12.55
   2  -3 -17   14.73   12.42
   2  -3 -17    7.64   10.59
   2  -3 -16   12.59   11.36
   2  -3 -16   -2.26    8.62
   2  -3 -15   15.75    9.86
   2  -3 -15    1.66    8.32
  -2   3  14  168.08   19.04
   2  -3 -14  169.32   23.86
   2  -3 -14  175.89   21.90
  -2   3  13   45.60   12.00
   2  -3 -13   42.18   12.94
   2  -3 -13   43.50   12.81
  -2   3  12    8.97    8.03
   2  -3 -12   14.43    8.58
   2  -3 -12    1.28    6.66
  -2   3  11  111.08   16.74
   2  -3 -11  135.21   16.52
   2  -3 -11  125.17   18.61
  -2   3  10   85.17   15.07
   2  -3 -10   75.78   13.45
   2  -3 -10   74.88   14.60
  -2   3   9  409.20   23.69
   2  -3  -9  436.01   23.74
   2  -3  -9  429.48   25.10
  -2   3   8  397.80   22.71
   2  -3  -8  430.38   22.50
   2  -3  -8  408.61   23.52
  -2   3   7  460.09   24.04
   2  -3  -7  487.93   22.71
   2  -3  -7  445.15   23.22
  -2   3   6    6.87    5.29
   2  -3  -6    9.95    5.89
   2  -3  -6    9.73    5.59
  -2   3   5  380.69   20.79
   2  -3  -5  344.82   17.76
   2  -3  -5  365.15   19.42
  -2   3   4   85.85   12.59
   2  -3  -4   65.28    9.99
   2  -3  -4   56.52    9.22
  -2   3   3  286.89   16.99
   2  -3  -3  231.22   14.05
   2  -3  -3  237.11   14.94
  -2   3   2  345.42   17.55
   2  -3  -2  330.99   16.01
   2  -3  -2  315.37   16.61
  -2   3   1   25.19    6.92
   2  -3  -1   26.73    7.13
  -2   3   0  181.57   12.12
   2  -3   0  184.09   12.89
  -2   3  -1  269.60   13.92
   2  -3   1  264.95   15.75
  -2   3  -2   36.50    6.53
   2  -3   2   38.94    8.11
  -2   3  -3  969.24   22.58
  -2   3  -3  921.94   28.99
   2  -3   3  916.56   29.24
  -2   3  -4  150.79    9.01
  -2   3  -4  132.64   12.55
   2  -3   4  136.49   13.58
  -2   3  -5 1539.22   24.33
  -2   3  -5 1457.59   39.70
   2  -3   5 1518.86   40.64
  -2   3  -6  523.11   12.30
  -2   3  -6  562.17   26.21
   2  -3   6  484.09   12.81
   2  -3   6  576.43   26.94
  -2   3  -7  365.66   22.84
  -2   3  -7  367.02   22.54
   2  -3   7  329.33   21.43
  -2   3  -8  283.99   20.83
  -2   3  -8  298.50   21.99
   2  -3   8  279.42   21.52
  -2   3  -9   79.83   15.37
  -2   3  -9   47.90   12.47
   2  -3   9   55.67   12.89
  -2   3 -10   27.75    9.86
  -2   3 -10   30.48   11.27
   2  -3  10   20.15    9.86
  -2   3 -11  107.71   18.10
  -2   3 -11  120.26   19.00
   2  -3  11   84.15   16.35
  -2   3 -12  183.15   21.26
  -2   3 -12  165.35   20.32
   2  -3  12  159.16   19.77
  -2   3 -13   88.67   18.96
  -2   3 -13   88.88   18.61
   2  -3  13   65.87   16.27
  -2   3 -14   20.83   11.36
  -2   3 -14   12.08   10.72
   2  -3  14   12.68   10.16
  -2   3 -15   35.18   13.75
  -2   3 -15   56.99   17.55
   2  -3  15   34.32   14.39
  -2   3 -16    0.13    7.90
  -2   3 -16   14.52   12.17
   2  -3  16   11.91   10.63
  -2   3 -17   17.85   13.49
  -2   3 -17   10.67   12.55
   2  -3  17    6.36   11.53
  -2   3 -18   -8.15    8.71
  -2   3 -18    7.43   12.00
   2  -3  18    7.04   11.40
  -2   3 -19    0.17   10.42
  -2   3 -19    8.11   12.76
   2  -3  19    7.68   12.94
  -2   3 -20   -2.39    9.99
  -2   3 -20  -11.23   11.36
   2  -3  20   -0.26   11.53
  -2   3 -21    3.12   14.98
   2  -3  21   -0.09   13.32
   2  -2 -18   -3.93    9.48
   2  -2 -18    0.38    9.73
   2  -2 -17   20.36   12.55
   2  -2 -17   12.30   10.42
   2  -2 -16    8.75    9.35
   2  -2 -16   11.53   10.63
   2  -2 -15   11.65   10.08
   2  -2 -15    6.49    8.41
  -2   2  14   74.80   19.85
   2  -2 -14   83.46   18.10
   2  -2 -14   67.97   16.05
  -2   2  13    3.29    6.32
   2  -2 -13   -3.20    6.02
   2  -2 -13    0.77    6.87
  -2   2  12  496.89   27.11
   2  -2 -12  498.64   29.84
   2  -2 -12  522.08   30.74
  -2   2  11  301.79   20.96
   2  -2 -11  216.11   19.77
   2  -2 -11  241.25   20.75
  -2   2  10  157.19   15.16
   2  -2 -10  190.02   17.67
   2  -2 -10  154.55   16.39
  -2   2   9  484.90   24.33
   2  -2  -9  439.13   24.16
   2  -2  -9  425.55   23.65
  -2   2   8   11.78    5.85
   2  -2  -8    9.61    6.49
   2  -2  -8   10.08    6.15
  -2   2   7   26.73    7.64
   2  -2  -7   12.21    6.10
   2  -2  -7   15.11    5.98
  -2   2   6   34.03    8.67
   2  -2  -6   29.67    8.07
   2  -2  -6   32.23    7.98
  -2   2   5    2.26    4.10
   2  -2  -5   -4.61    3.50
   2  -2  -5    4.27    4.57
  -2   2   4    5.76    4.31
   2  -2  -4    4.99    4.10
   2  -2  -4    4.27    4.10
  -2   2   3  989.73   27.62
   2  -2  -3  889.02   24.80
   2  -2  -3  961.72   25.32
  -2   2   2 2588.42   42.56
   2  -2  -2 2151.55   36.72
   2  -2  -2 2499.66   38.68
  -2   2   1 4118.29   50.97
   2  -2  -1 3493.71   45.60
   2  -2  -1 4042.04   48.20
  -2   2   0 1611.24   30.52
   2  -2   0 1694.41   31.55
  -2   2  -1  652.98   18.78
   2  -2   1  615.19   20.15
  -2   2  -2    8.20    3.67
   2  -2   2    3.12    4.14
  -2   2  -3 1871.11   27.15
  -2   2  -3 1834.86   36.93
   2  -2   3 1800.84   36.89
  -2   2  -4 2031.89   25.83
  -2   2  -4 2098.70   41.58
  -2   2  -4 2141.99   42.48
   2  -2   4 2109.80   42.18
  -2   2  -5 3159.56   28.26
  -2   2  -5 3151.32   53.66
  -2   2  -5 3241.70   55.20
   2  -2   5 3131.55   27.92
   2  -2   5 3129.37   54.22
  -2   2  -6  422.27    8.24
  -2   2  -6  467.73   22.46
  -2   2  -6  487.03   23.35
   2  -2   6  375.61    7.73
   2  -2   6  451.43   22.54
  -2   2  -7  874.93   31.76
  -2   2  -7  879.50   32.45
   2  -2   7  783.74   30.74
  -2   2  -8   41.88   10.50
  -2   2  -8   36.12   10.16
   2  -2   8   44.40   10.54
  -2   2  -9   51.87   11.65
  -2   2  -9   34.67    9.99
   2  -2   9   49.39   11.65
  -2   2 -10   77.10   14.81
  -2   2 -10   79.79   15.20
   2  -2  10   51.10   12.00
  -2   2 -11   89.40   16.22
  -2   2 -11  102.50   16.91
  -2   2 -12  130.17   20.53
  -2   2 -12  131.75   20.19
  -2   2 -13   28.90   11.70
  -2   2 -13   25.62   11.31
  -2   2 -14   10.46    9.86
  -2   2 -14   17.67   11.65
  -2   2 -15    3.84    8.71
  -2   2 -15    4.27    9.78
   2  -2  15    7.86   10.67
  -2   2 -16   10.50   10.29
  -2   2 -16    6.83   10.63
   2  -2  16    2.77    9.01
  -2   2 -17   15.11   11.01
  -2   2 -17   32.45   15.63
   2  -2  17   17.12   12.68
  -2   2 -18    3.54    9.39
  -2   2 -18    3.50   12.12
   2  -2  18    4.99   10.33
  -2   2 -19   -8.03    8.37
  -2   2 -19  -10.46    8.75
   2  -2  19   -2.35    9.43
  -2   2 -20   -1.28   11.10
  -2   2 -20    4.23   13.58
   2  -2  20   -7.64   10.46
  -2   2 -21   -4.27   11.27
  -2   2 -21    7.77   14.47
   2  -2  21    5.76   14.22
   2  -1 -19   -0.77   11.36
   2  -1 -18   20.49   15.54
   2  -1 -18   16.35   12.38
   2  -1 -17   -6.57    7.56
   2  -1 -17    2.43    9.78
   2  -1 -16   34.11   13.92
   2  -1 -16   25.53   12.76
   2  -1 -15   27.88   12.21
   2  -1 -15   29.29   12.00
   2  -1 -14   55.16   15.92
   2  -1 -14   76.93   16.86
  -2   1  13  139.39   15.33
   2  -1 -13  156.00   22.50
   2  -1 -13  118.00   18.14
  -2   1  12  446.69   24.25
   2  -1 -12  433.67   28.86
   2  -1 -12  399.47   26.64
  -2   1  11  290.69   19.55
   2  -1 -11  278.44   22.80
   2  -1 -11  280.40   21.69
  -2   1  10  574.55   25.57
   2  -1 -10  553.03   29.03
   2  -1 -10  546.80   27.54
  -2   1   9    1.79    4.35
   2  -1  -9   -1.11    5.08
   2  -1  -9    0.55    4.91
  -2   1   8   77.44   11.44
   2  -1  -8   62.59   11.48
   2  -1  -8   47.43    9.43
  -2   1   7  228.27   15.16
   2  -1  -7  249.24   17.20
   2  -1  -7  222.04   15.24
  -2   1   6   54.94    9.22
   2  -1  -6   43.20    8.97
   2  -1  -6   39.19    7.64
  -2   1   5  333.89   16.56
   2  -1  -5  370.61   18.10
   2  -1  -5  304.74   15.11
  -2   1   4    1.84    4.10
   2  -1  -4   -0.13    3.80
   2  -1  -4    2.65    3.54
  -2   1   3 3010.35   44.19
   2  -1  -3 2975.55   43.25
   2  -1  -3 2702.84   36.63
  -2   1   2  603.45   19.30
   2  -1  -2  476.96   16.91
   2  -1  -2  544.24   15.88
  -2   1   1   25.96    5.59
   2  -1  -1   30.31    6.02
   2  -1  -1   22.71    4.82
  -2   1   0  103.91    8.03
   2  -1   0  107.24    7.94
  -2   1  -1 1488.63   24.97
   2  -1   1 1429.46   25.62
  -2   1  -2 1730.27   25.10
   2  -1   2 1593.78   29.03
  -2   1  -3  519.48   12.98
  -2   1  -3  572.12   18.87
  -2   1  -3  603.75   19.85
   2  -1   3  559.99   19.08
  -2   1  -4    0.77    2.13
  -2   1  -4    3.76    3.97
  -2   1  -4    1.71    4.01
   2  -1   4    7.00    2.39
   2  -1   4    2.73    4.18
  -2   1  -5    1.32    1.84
  -2   1  -5    2.05    4.31
  -2   1  -5    3.12    4.35
   2  -1   5    2.01    1.71
  -2   1  -6 1025.72   30.27
  -2   1  -6 1016.37   31.42
   2  -1   6  998.70   10.93
   2  -1   6  995.24   10.84
  -2   1  -7 1541.14   39.02
  -2   1  -7 1480.86   40.13
  -2   1  -8  613.36   26.34
  -2   1  -8  632.95   28.26
  -2   1  -9 2099.55   50.80
  -2   1  -9 2087.90   53.02
  -2   1 -10  255.68   19.38
  -2   1 -10  248.17   20.41
  -2   1 -11  228.10   19.81
  -2   1 -11  241.94   21.86
  -2   1 -12   75.39   15.37
  -2   1 -12   68.73   14.64
  -2   1 -13   27.02   11.23
  -2   1 -13   36.12   11.95
  -2   1 -14   85.26   17.55
  -2   1 -14   78.17   16.95
  -2   1 -15   14.05    9.73
  -2   1 -15   11.44    9.86
  -2   1 -16   19.04   10.63
  -2   1 -16   12.89   10.84
  -2   1 -17   -7.73    6.87
  -2   1 -17    6.32   10.76
  -2   1 -18    0.85    8.79
  -2   1 -18   -0.81   10.29
  -2   1 -19   -2.31    9.95
  -2   1 -19   -6.57   10.42
  -2   1 -20   -1.92   10.29
  -2   1 -20    4.78   13.79
   2  -1  20   -9.43   10.33
  -2   1 -21   -4.65   10.59
   2  -1  21   -2.18   12.08
   2   0 -20   -3.24   10.80
   2   0 -19   19.00   13.96
   2   0 -18    0.98   11.87
   2   0 -17   -0.38    9.78
   2   0 -17    7.68    9.61
   2   0 -16    6.40   10.12
   2   0 -16    2.43    8.28
   2   0 -15   72.45   18.19
   2   0 -15   49.35   14.26
   2   0 -14    1.62    8.75
   2   0 -14   -0.21    6.70
   2   0 -13  409.63   30.23
   2   0 -13  388.84   27.28
  -2   0  12   36.76    9.01
   2   0 -12   38.89   12.81
   2   0 -12   38.72   11.27
  -2   0  11  577.24   24.97
   2   0 -11  564.69   31.55
   2   0 -11  563.71   28.90
  -2   0  10   27.11    7.64
   2   0 -10   26.13    9.39
   2   0 -10   27.02    8.45
  -2   0   9  363.78   19.00
   2   0  -9  419.32   24.76
   2   0  -9  349.35   20.53
  -2   0   8  301.32   16.65
   2   0  -8  259.91   18.74
   2   0  -8  288.51   17.55
  -2   0   7    1.84    3.71
   2   0  -7    3.37    5.64
   2   0  -7    2.56    4.18
  -2   0   6  185.67   12.51
   2   0  -6  171.24   14.17
   2   0  -6  165.30   11.74
  -2   0   5   56.57    8.45
   2   0  -5   54.22    9.31
   2   0  -5   56.23    7.73
  -2   0   4  106.77    9.48
   2   0  -4   90.68    9.48
   2   0  -4  102.59    7.94
  -2   0   3  710.31   20.49
   2   0  -3  634.58   20.58
   2   0  -3  639.19   15.80
  -2   0   2 3423.78   41.67
   2   0  -2 2292.18   35.01
   2   0  -2 3128.56   29.84
  -2   0   1  370.27   13.75
  -2   0   1  360.28    9.61
   2   0  -1  338.38   13.06
   2   0  -1  372.36    9.73
  -2   0   0  292.01   11.44
  -2   0   0  266.74    8.62
   2   0   0  254.66   11.10
   2   0   0  262.98    8.50
  -2   0  -1   17.20    3.88
   2   0   1   21.30    3.80
  -2   0  -2 3309.41   32.49
  -2   0  -2 3468.09   37.61
   2   0   2 3164.98   35.69
  -2   0  -3  137.51    7.04
  -2   0  -3  145.37    8.92
  -2   0  -3  150.06   10.20
   2   0   3  126.88    7.98
  -2   0  -4  547.40   12.25
  -2   0  -4  596.66   18.23
  -2   0  -4  608.11   20.32
   2   0   4  600.29   12.76
   2   0   4  543.34   12.08
  -2   0  -5  272.85   13.79
  -2   0  -5  250.94   14.64
   2   0   5  281.77    8.62
   2   0   5  286.12    8.62
  -2   0  -6 1585.07   33.94
  -2   0  -6 1569.06   37.31
   2   0   6 1593.10   18.91
   2   0   6 1481.20   18.23
  -2   0  -7   50.93    8.88
  -2   0  -7   51.19    9.73
   2   0   7   56.95    4.18
   2   0   7   50.08    4.18
  -2   0  -8 3467.88   57.25
  -2   0  -8 3496.18   63.27
   2   0   8 3486.45   27.19
   2   0   8 3262.27   26.26
  -2   0  -9   88.20   12.76
  -2   0  -9  106.00   15.54
   2   0   9  104.68    5.21
   2   0   9   95.80    5.08
  -2   0 -10  404.25   22.88
  -2   0 -10  421.93   25.44
   2   0  10  419.11    9.31
   2   0  10  383.55    8.92
  -2   0 -11   12.17    6.79
  -2   0 -11   10.16    7.86
  -2   0 -12    3.42    5.64
  -2   0 -12    4.18    7.17
  -2   0 -13    5.89    6.28
  -2   0 -13    0.77    7.94
  -2   0 -14   10.08    7.68
  -2   0 -14   26.38   12.08
  -2   0 -15   -1.54    6.70
  -2   0 -15    0.85    8.37
  -2   0 -16    4.99    7.64
  -2   0 -16    7.13    9.48
  -2   0 -17    9.61    9.56
  -2   0 -17   -4.65    9.52
  -2   0 -18   12.98   10.16
  -2   0 -18   17.97   12.85
  -2   0 -19   18.66   13.45
  -2   0 -19    1.45   10.72
  -2   0 -20   18.49   15.28
  -2   0 -21   14.30   14.73
   2   1 -21   10.63   16.27
   2   1 -20   10.89   14.60
   2   1 -19    4.53   12.04
   2   1 -18   -2.31    9.95
   2   1 -17   32.06   15.88
   2   1 -16   34.92   16.78
   2   1 -16   33.39   13.32
   2   1 -15   -4.65    7.21
   2   1 -15    3.42    7.94
   2   1 -14   25.23   12.98
   2   1 -14   27.11   11.57
   2   1 -13   10.20    9.18
   2   1 -13   16.09    9.14
   2   1 -12   54.35   14.73
   2   1 -12   29.12   10.59
  -2  -1  11  154.84   13.19
   2   1 -11  145.20   21.13
   2   1 -11  149.46   16.18
  -2  -1  10   85.94   10.12
   2   1 -10   99.26   16.91
   2   1 -10   85.85   13.32
  -2  -1   9  569.64   22.03
   2   1  -9  617.24   30.23
   2   1  -9  602.34   26.21
  -2  -1   8  442.29   18.83
   2   1  -8  461.42   25.53
   2   1  -8  435.63   20.83
  -2  -1   7    8.45    4.27
   2   1  -7   14.64    7.13
   2   1  -7    8.54    4.87
  -2  -1   6    2.05    3.67
   2   1  -6    0.51    4.53
   2   1  -6   -0.30    3.29
  -2  -1   5    5.42    3.84
   2   1  -5    0.81    4.91
   2   1  -5    4.44    3.59
  -2  -1   4  305.72   13.75
   2   1  -4  246.46   14.94
   2   1  -4  311.52   11.91
  -2  -1   3  235.62   11.83
   2   1  -3  249.11   13.66
   2   1  -3  226.87    8.84
  -2  -1   2   30.91    5.68
  -2  -1   2   32.87    3.33
   2   1  -2   35.86    6.57
   2   1  -2   40.60    3.71
  -2  -1   1   88.63    7.68
  -2  -1   1   77.19    2.90
   2   1  -1   84.40    7.39
   2   1  -1   89.53    3.03
  -2  -1   0  341.49   12.30
   2   1   0  363.61   11.87
   2   1   0  329.80    6.10
   2   1   0  346.96    6.32
  -2  -1  -1    4.10    2.99
  -2  -1  -1    3.67    2.18
   2   1   1    2.69    2.39
   2   1   1    3.46    2.13
  -2  -1  -2  243.00    9.69
  -2  -1  -2  254.83    9.69
   2   1   2  249.71    9.69
  -2  -1  -3  418.04   14.56
   2   1   3  408.05   12.34
  -2  -1  -4   35.78    5.42
  -2  -1  -4   41.20    7.09
   2   1   4   43.97    5.34
  -2  -1  -5   88.88    7.68
  -2  -1  -5   78.68    9.61
   2   1   5   88.93    6.45
  -2  -1  -6   91.87    8.62
  -2  -1  -6   92.94   10.42
   2   1   6   89.01    6.45
  -2  -1  -7 2282.02   39.58
  -2  -1  -7 2348.41   48.20
   2   1   7 2254.10   29.37
  -2  -1  -8   87.82    9.69
  -2  -1  -8   76.29   12.04
   2   1   8   74.20    7.04
  -2  -1  -9  585.01   23.78
  -2  -1  -9  576.56   27.58
   2   1   9  605.59   16.44
  -2  -1 -10  284.97   18.14
  -2  -1 -10  297.31   21.43
   2   1  10  293.94   12.00
  -2  -1 -11    8.07    5.93
  -2  -1 -11    5.25    7.00
   2   1  11    8.37    3.67
  -2  -1 -12   86.96   14.52
  -2  -1 -12   69.67   14.22
  -2  -1 -13   -0.38    5.25
  -2  -1 -13    1.75    7.73
  -2  -1 -14  111.81   18.23
  -2  -1 -14   97.72   18.87
  -2  -1 -15    6.28    7.21
  -2  -1 -15    2.48    7.94
  -2  -1 -16   14.13    8.97
  -2  -1 -16   14.69   10.20
  -2  -1 -17   -3.71    7.09
  -2  -1 -17   10.16   11.31
  -2  -1 -18   47.99   15.50
  -2  -1 -18   49.14   17.50
  -2  -1 -19   -1.79   14.98
  -2  -1 -19   15.67   13.32
  -2  -1 -20    6.83   11.40
  -2  -1 -21    0.04   13.02
  -2  -1 -22   19.38   25.79
   2   2 -20    4.82   11.74
   2   2 -19   -9.01   10.93
   2   2 -18   42.48   18.66
   2   2 -17   14.00   13.32
   2   2 -16    8.58   12.42
   2   2 -16    7.26    8.88
   2   2 -15   34.58   14.69
   2   2 -15   37.18   12.89
   2   2 -14   18.44   11.78
   2   2 -14   29.63   11.23
   2   2 -13    6.49   10.46
   2   2 -13    6.10    7.26
   2   2 -12   13.49    9.69
   2   2 -12    5.55    6.96
  -2  -2  11   48.33    8.67
   2   2 -11   44.44   13.19
   2   2 -11   49.61   11.44
  -2  -2  10  762.99   24.55
   2   2 -10  755.61   36.20
   2   2 -10  791.81   31.59
  -2  -2   9    6.45    4.65
   2   2  -9    4.91    6.83
   2   2  -9   11.23    6.49
  -2  -2   8 1013.51   26.73
   2   2  -8 1055.05   38.34
   2   2  -8 1040.49   31.68
  -2  -2   7    7.64    4.31
   2   2  -7   13.36    7.68
   2   2  -7    6.70    4.91
  -2  -2   6  157.28   10.72
   2   2  -6  181.19   16.31
   2   2  -6  161.38   11.44
  -2  -2   5   92.43    8.54
   2   2  -5  118.60   12.59
   2   2  -5  109.21    8.84
  -2  -2   4  633.81   18.91
   2   2  -4  546.71   21.90
   2   2  -4  672.27   17.03
  -2  -2   3  838.00   20.88
   2   2  -3  905.71   25.66
   2   2  -3  917.50   16.65
  -2  -2   2    7.34    4.27
  -2  -2   2    7.68    2.43
  -2  -2   2    8.97    2.26
   2   2  -2    1.02    4.06
   2   2  -2    6.32    2.35
  -2  -2   1 1354.49   24.93
  -2  -2   1 1476.42   11.87
  -2  -2   1 1471.00   11.70
   2   2  -1 1063.84   22.20
   2   2  -1 1519.16   27.15
   2   2  -1 1131.90   10.59
  -2  -2   0    7.98    3.80
  -2  -2   0    5.04    1.62
   2   2   0    4.78    3.59
   2   2   0    5.04    3.07
   2   2   0    5.17    1.62
  -2  -2  -1  530.88   12.25
  -2  -2  -1  502.27   10.84
   2   2   1  615.96   16.69
   2   2   1  537.32   12.34
   2   2   1  513.50   10.80
  -2  -2  -2  465.43    9.90
  -2  -2  -2  447.20   12.85
   2   2   2  440.97    9.73
  -2  -2  -3    4.35    3.33
   2   2   3    4.23    3.37
  -2  -2  -4 1295.53   27.79
   2   2   4 1307.06   24.63
   2   2   4 1292.42   17.55
  -2  -2  -5  342.60   11.06
  -2  -2  -5  369.63   17.20
   2   2   5  366.77   13.70
  -2  -2  -6 2025.87   29.63
  -2  -2  -6 1914.40   40.34
   2   2   6 2079.92   32.62
  -2  -2  -7 1394.24   27.75
  -2  -2  -7 1462.33   38.04
   2   2   7 1356.20   27.19
  -2  -2  -8  782.93   23.10
  -2  -2  -8  757.78   29.54
   2   2   8  752.62   21.35
  -2  -2  -9  663.69   23.31
  -2  -2  -9  665.61   29.84
   2   2   9  653.10   20.32
  -2  -2 -10  148.06   12.81
  -2  -2 -10  167.95   16.78
   2   2  10  149.81   10.80
  -2  -2 -11  283.35   18.02
  -2  -2 -11  301.58   23.40
   2   2  11  306.23   15.03
  -2  -2 -12   44.57   10.20
  -2  -2 -12   34.32   11.23
   2   2  12   26.08    6.49
  -2  -2 -13   66.00   12.72
  -2  -2 -13   62.67   15.07
  -2  -2 -14    4.61    6.49
  -2  -2 -14    2.26    7.21
  -2  -2 -15    0.90    6.92
  -2  -2 -15    9.22    9.86
  -2  -2 -16   -0.60    6.32
  -2  -2 -16    5.93    9.69
  -2  -2 -17   30.78   11.83
  -2  -2 -17   19.81   12.00
  -2  -2 -18   17.50   13.28
  -2  -2 -19   46.11   17.46
  -2  -2 -20   -2.99   11.36
  -2  -2 -21    0.77   13.02
  -2  -2 -22    0.17   15.41
   2   3 -19    8.79   13.49
   2   3 -18   22.29   14.30
   2   3 -17    6.06   12.85
  -2  -3  16   44.57   15.20
   2   3 -16   58.45   18.27
   2   3 -15   27.92   14.94
   2   3 -15   38.17   12.98
   2   3 -14   34.28   14.34
   2   3 -14   39.79   12.76
   2   3 -13  109.97   22.16
   2   3 -13   69.84   14.81
   2   3 -12   14.34    9.82
   2   3 -12    0.85    5.85
   2   3 -11   12.08    9.43
   2   3 -11    9.48    7.00
  -2  -3  10   73.77    8.79
   2   3 -10   76.67    8.97
   2   3 -10   83.42   16.99
   2   3 -10   75.91   12.89
  -2  -3   9  172.18   11.83
   2   3  -9  171.49   11.91
   2   3  -9  179.90   19.00
   2   3  -9  176.28   15.16
  -2  -3   8  206.63   12.55
   2   3  -8  206.72   12.59
   2   3  -8  254.96   21.13
   2   3  -8  228.10   15.84
  -2  -3   7  211.45   12.51
   2   3  -7  189.38   11.91
   2   3  -7  245.91   19.21
   2   3  -7  255.90   15.67
  -2  -3   6 1539.65   30.70
  -2  -3   6 1438.72   32.49
   2   3  -6 1560.35   30.82
   2   3  -6 1541.27   42.99
   2   3  -6 1658.25   34.62
  -2  -3   5   11.31    4.35
  -2  -3   5   12.42    4.74
   2   3  -5    6.06    4.06
   2   3  -5   16.78    7.00
   2   3  -5   10.80    4.57
  -2  -3   4  103.02    8.88
  -2  -3   4  115.10    8.58
   2   3  -4  120.35    9.43
   2   3  -4  136.02   12.47
   2   3  -4  107.71    8.45
  -2  -3   3  749.50   20.71
  -2  -3   3  735.58   17.29
   2   3  -3  867.72   22.07
   2   3  -3  788.27   25.36
  -2  -3   2   19.51    3.80
   2   3  -2   15.07    4.95
   2   3  -2   16.05    5.81
  -2  -3   1  721.88   14.00
   2   3  -1  776.65   20.79
   2   3  -1  796.59   21.35
   2   3  -1  723.25   13.96
  -2  -3   0 1830.94   22.20
   2   3   0 1754.73   30.61
   2   3   0 1994.66   29.20
   2   3   0 1950.00   22.97
  -2  -3  -1 6470.46   45.81
   2   3   1 7648.71   63.74
   2   3   1 7155.92   46.71
  -2  -3  -2 3217.92   24.63
  -2  -3  -2 3416.35   37.70
   2   3   2 3650.64   44.87
   2   3   2 3483.46   25.79
  -2  -3  -3 4138.10   46.36
   2   3   3 3992.73   47.64
   2   3   3 4067.92   19.08
  -2  -3  -4  202.70   12.21
   2   3   4  223.62   12.25
   2   3   4  222.55    4.40
  -2  -3  -5 2133.45   19.47
  -2  -3  -5 2120.17   40.09
   2   3   5 2188.99   37.18
   2   3   5 2205.56   19.72
  -2  -3  -6    1.54    2.26
  -2  -3  -6    7.60    5.21
   2   3   6    5.12    3.97
   2   3   6   -0.21    2.35
  -2  -3  -7  991.65   20.28
  -2  -3  -7  997.80   32.10
   2   3   7  975.17   26.38
  -2  -3  -8    4.40    3.33
  -2  -3  -8    1.45    4.65
   2   3   8    7.73    5.25
  -2  -3  -9  164.88   11.23
  -2  -3  -9  158.39   15.67
   2   3   9  152.11   12.21
  -2  -3 -10  626.93   22.58
  -2  -3 -10  640.81   30.91
   2   3  10  645.46   23.61
  -2  -3 -11  399.77   19.77
  -2  -3 -11  378.81   26.04
   2   3  11  375.43   18.78
  -2  -3 -12  160.91   14.00
  -2  -3 -12  147.97   18.06
   2   3  12  166.37   13.53
  -2  -3 -13  237.67   17.89
  -2  -3 -13  235.19   23.05
   2   3  13  233.06   16.05
  -2  -3 -14    1.58    5.38
  -2  -3 -14    3.88    8.03
  -2  -3 -15    0.04    6.02
  -2  -3 -15    9.78    9.39
  -2  -3 -16   20.15    9.52
  -2  -3 -16   17.76   11.10
  -2  -3 -17    5.81    9.90
  -2  -3 -18   10.33   12.00
  -2  -3 -19    0.94   13.02
  -2  -3 -20  -12.00   10.12
  -2  -3 -21   -4.74   12.21
  -2  -3 -22   -2.05   13.19
   2   4 -19    4.65   11.57
   2   4 -18   10.89   13.75
   2   4 -17   -6.62   10.29
   2   4 -16   32.02   15.20
  -2  -4  15    7.17    9.22
   2   4 -15   28.82   14.17
  -2  -4  14  179.61   21.18
   2   4 -14  216.32   26.51
   2   4 -14  218.63   23.22
  -2  -4  13    2.09    7.64
   2   4 -13    8.32    9.69
   2   4 -13    7.98    8.92
  -2  -4  12   62.80   13.79
   2   4 -12   51.02   15.67
   2   4 -12   55.37   13.36
  -2  -4  11    1.11    6.06
   2   4 -11   -2.56    7.60
   2   4 -11    2.31    6.40
  -2  -4  10  113.86   14.17
   2   4 -10  126.67   11.31
   2   4 -10  116.42   20.62
   2   4 -10  108.57   15.54
  -2  -4   9  241.25   18.40
   2   4  -9  216.15   12.85
   2   4  -9  249.96   22.97
   2   4  -9  245.95   17.97
  -2  -4   8    3.37    4.91
   2   4  -8    4.53    4.10
   2   4  -8    8.28    7.00
   2   4  -8   13.75    6.36
  -2  -4   7  578.14   23.91
   2   4  -7  541.55   19.34
   2   4  -7  570.75   29.41
   2   4  -7  569.94   23.40
  -2  -4   6  516.75   21.00
   2   4  -6  514.91   18.61
   2   4  -6  460.18   25.70
   2   4  -6  470.34   20.15
  -2  -4   5   57.76    8.67
   2   4  -5   68.14    8.24
   2   4  -5   71.38   12.51
  -2  -4   4   26.04    5.76
   2   4  -4   27.37    5.98
   2   4  -4   23.95    7.68
  -2  -4   3   39.19    6.40
   2   4  -3   42.39    7.17
   2   4  -3   59.47   10.29
  -2  -4   2  172.52    9.82
   2   4  -2  160.18   11.14
   2   4  -2  164.66   12.51
  -2  -4   1   10.37    3.88
   2   4  -1   11.91    5.08
   2   4  -1   10.20    4.74
  -2  -4   0    8.45    3.76
   2   4   0   12.00    5.38
   2   4   0    6.70    3.97
  -2  -4  -1  458.81   15.20
   2   4   1  452.02   17.89
   2   4   1  504.32   14.47
  -2  -4  -2   34.84    4.23
  -2  -4  -2   38.29    6.53
   2   4   2   47.73    7.86
   2   4   2   42.48    4.40
  -2  -4  -3  635.04    9.31
  -2  -4  -3  633.59   20.41
   2   4   3  730.03   23.48
   2   4   3  724.10   10.12
  -2  -4  -4  464.62   19.13
   2   4   4  505.30   19.89
  -2  -4  -5  560.89   22.11
   2   4   5  585.74   22.07
  -2  -4  -6   19.04    2.43
  -2  -4  -6   19.17    6.57
   2   4   6   27.58    7.17
   2   4   6   11.06    2.18
  -2  -4  -7  624.63   13.53
  -2  -4  -7  686.02   27.62
   2   4   7  698.06   25.06
   2   4   7  677.61   14.09
  -2  -4  -8   45.94    5.38
  -2  -4  -8   37.83    9.95
   2   4   8   35.95    8.03
  -2  -4  -9  622.19   18.31
  -2  -4  -9  663.18   30.40
   2   4   9  613.02   24.80
  -2  -4 -10  327.23   15.11
  -2  -4 -10  346.02   23.69
   2   4  10  369.24   20.15
  -2  -4 -11    6.70    4.61
  -2  -4 -11    1.02    6.06
   2   4  11    3.42    4.91
  -2  -4 -12  144.04   12.68
  -2  -4 -12  164.49   19.64
   2   4  12  163.34   14.90
  -2  -4 -13   97.34   13.62
  -2  -4 -13  124.23   20.62
   2   4  13  112.79   13.19
  -2  -4 -14   52.30   11.10
  -2  -4 -14   43.93   13.79
   2   4  14   48.54   10.89
  -2  -4 -15   74.16   13.23
  -2  -4 -15   69.03   18.19
  -2  -4 -16   -5.04    7.51
  -2  -4 -17    0.09    7.94
  -2  -4 -18   10.67   12.94
  -2  -4 -19   15.03   14.17
  -2  -4 -20   11.14   12.89
  -2  -4 -21   -4.65   11.91
   2   5 -18   -1.07   13.06
   2   5 -17   -5.04   11.36
   2   5 -16    3.63   11.36
   2   5 -15  169.19   28.90
  -2  -5  14    0.68    8.03
   2   5 -14    7.60   10.76
  -2  -5  13  209.66   22.16
   2   5 -13  260.38   28.22
   2   5 -13  285.78   24.85
  -2  -5  12   43.80   12.76
   2   5 -12   89.53   19.77
   2   5 -12   68.69   14.05
  -2  -5  11    8.67    7.64
   2   5 -11   15.03   11.01
   2   5 -11   12.85    8.28
  -2  -5  10  203.94   18.44
   2   5 -10  213.46   23.18
   2   5 -10  207.27   18.96
  -2  -5   9   32.19    9.35
   2   5  -9   30.61    6.66
   2   5  -9   29.50   11.70
  -2  -5   8   34.24    9.22
   2   5  -8   37.57    7.26
   2   5  -8   41.92   12.76
  -2  -5   7    2.95    4.65
   2   5  -7   -1.15    3.33
   2   5  -7    0.13    6.53
  -2  -5   6  197.11   14.77
   2   5  -6  223.28   13.45
   2   5  -6  227.63   19.72
  -2  -5   5   28.95    7.04
   2   5  -5   37.23    7.47
   2   5  -5   39.45   10.80
  -2  -5   4   38.21    7.39
   2   5  -4   38.55    7.60
   2   5  -4   41.20    9.69
  -2  -5   3   20.02    5.76
   2   5  -3   20.02    5.93
   2   5  -3   22.50    7.26
  -2  -5   2    5.55    4.18
   2   5  -2   12.04    5.12
   2   5  -2   10.50    5.76
  -2  -5   1   20.28    5.42
   2   5  -1   22.80    6.49
   2   5  -1   26.21    6.70
  -2  -5   0  110.36    9.52
   2   5   0  179.22   12.72
   2   5   0  132.52   10.16
  -2  -5  -1   11.78    4.61
   2   5   1   22.80    6.79
   2   5   1   12.51    4.57
  -2  -5  -2 1786.11   35.01
   2   5   2 2018.91   41.16
   2   5   2 2017.12   27.88
  -2  -5  -3   56.91    4.82
  -2  -5  -3   44.91    7.77
   2   5   3   58.66    9.82
   2   5   3   62.97    4.87
  -2  -5  -4 1171.77   11.53
  -2  -5  -4 1217.92   32.40
   2   5   4 1399.15   36.33
  -2  -5  -5  188.96   14.30
   2   5   5  209.11   14.90
  -2  -5  -6  420.86   22.07
   2   5   6  426.88   21.09
  -2  -5  -7   14.77    7.34
   2   5   7   21.09    7.09
  -2  -5  -8  184.69    7.51
  -2  -5  -8  188.70   16.74
   2   5   8  204.28   15.92
   2   5   8  180.63    8.37
  -2  -5  -9   29.71    4.95
  -2  -5  -9   23.27    8.84
   2   5   9   16.05    6.62
  -2  -5 -10  164.41   10.12
  -2  -5 -10  146.01   16.65
   2   5  10  190.75   16.35
  -2  -5 -11  122.44    9.90
  -2  -5 -11  136.27   19.55
   2   5  11  150.66   15.28
  -2  -5 -12   58.70    9.26
  -2  -5 -12   63.14   14.64
   2   5  12   57.21   12.17
  -2  -5 -13   40.90    8.79
  -2  -5 -13   35.35   13.49
   2   5  13   30.52    9.52
  -2  -5 -14  283.69   27.49
   2   5  14  278.05   21.30
  -2  -5 -15    2.95    9.14
   2   5  15    1.54    6.15
  -2  -5 -16    5.59   10.46
  -2  -5 -17    3.71    9.61
  -2  -5 -18    4.95   12.55
  -2  -5 -19   13.32   13.32
  -2  -5 -20    1.45   13.28
  -2  -5 -21    6.10   14.30
   2   6 -17    4.53   12.98
   2   6 -16   -3.63   10.89
   2   6 -15    8.45   11.23
   2   6 -14   39.92   16.22
  -2  -6  13  194.89   22.84
   2   6 -13  146.43   26.90
  -2  -6  12   -4.91    7.17
   2   6 -12   -2.43    8.92
  -2  -6  11  359.04   25.91
   2   6 -11  382.05   32.83
  -2  -6  10    8.71    7.47
   2   6 -10    6.96    9.35
  -2  -6   9   38.34   10.63
   2   6  -9   46.24   13.75
  -2  -6   8  116.63   14.05
   2   6  -8  124.58   11.19
   2   6  -8   97.34   17.80
  -2  -6   7   25.23    8.11
   2   6  -7   37.44    7.90
   2   6  -7   14.73    8.84
  -2  -6   6   17.29    6.87
   2   6  -6   25.27    6.70
   2   6  -6   22.41    8.97
  -2  -6   5   24.85    7.13
   2   6  -5   37.14    7.68
   2   6  -5   33.51    9.86
  -2  -6   4  443.31   20.58
   2   6  -4  503.77   21.22
   2   6  -4  502.10   26.30
  -2  -6   3  934.40   28.60
   2   6  -3  839.37   27.19
   2   6  -3  913.01   32.62
  -2  -6   2    0.98    3.88
   2   6  -2    3.67    4.65
   2   6  -2    5.34    5.12
  -2  -6   1  125.43   13.23
   2   6  -1  114.59   11.78
   2   6  -1  120.82   11.70
  -2  -6   0   10.97    5.59
   2   6   0   15.41    6.53
   2   6   0    9.65    4.82
  -2  -6  -1  134.44   11.95
   2   6   1  156.17   13.83
   2   6   1  145.11   10.37
  -2  -6  -2   23.14    6.83
   2   6   2   24.51    7.94
   2   6   2   31.08    5.76
  -2  -6  -3   72.41   10.97
   2   6   3   71.13   11.53
   2   6   3   75.48    6.40
  -2  -6  -4   35.14    5.64
  -2  -6  -4   26.47    9.09
   2   6   4   33.47    8.37
  -2  -6  -5  357.76    7.73
  -2  -6  -5  333.25   20.15
   2   6   5  350.46   21.05
  -2  -6  -6 1750.80   45.38
   2   6   6 1921.36   47.43
  -2  -6  -7  201.55   17.20
   2   6   7  210.94   17.12
  -2  -6  -8  454.50   26.30
   2   6   8  432.77   23.95
  -2  -6  -9   20.49    3.63
  -2  -6  -9   10.76    6.96
   2   6   9   16.27    7.81
  -2  -6 -10  490.57   14.26
  -2  -6 -10  503.81   29.71
   2   6  10  521.10   27.75
  -2  -6 -11   50.68    7.09
  -2  -6 -11   53.07   13.70
   2   6  11   53.71   12.59
  -2  -6 -12   15.80   10.16
   2   6  12   17.33    8.97
  -2  -6 -13  193.74   23.05
   2   6  13  183.49   19.21
  -2  -6 -14   45.34   14.00
   2   6  14   40.22   12.30
  -2  -6 -15   22.03   13.19
   2   6  15    7.86    7.77
  -2  -6 -16    6.02   10.89
  -2  -6 -17   22.84   13.96
  -2  -6 -18   17.97   13.83
  -2  -6 -19    7.13   11.65
  -2  -6 -20   26.17   17.16
  -2  -6 -21   10.84   13.75
   2   7 -17    0.77   13.53
   2   7 -16  -10.54    8.20
   2   7 -15   -0.13   10.76
   2   7 -14   58.49   19.89
  -2  -7  13   17.76   16.14
   2   7 -13   18.36   13.49
  -2  -7  12  169.32   20.41
   2   7 -12  138.15   25.36
  -2  -7  11  185.54   20.62
   2   7 -11  154.76   26.21
  -2  -7  10  113.73   17.85
   2   7 -10  175.04   26.64
  -2  -7   9   -0.04    5.93
   2   7  -9    6.15    8.37
  -2  -7   8    7.56    7.17
   2   7  -8   11.19    5.72
   2   7  -8    5.98    8.15
  -2  -7   7   26.68    9.01
   2   7  -7   26.60    7.34
   2   7  -7   26.08   11.44
  -2  -7   6    3.12    5.29
   2   7  -6   -0.73    3.93
   2   7  -6    0.98    6.87
  -2  -7   5   15.11    6.87
   2   7  -5    7.21    5.38
   2   7  -5    8.15    7.00
  -2  -7   4    7.09    5.72
   2   7  -4   14.77    6.36
   2   7  -4    4.74    5.85
  -2  -7   3   74.92   11.91
   2   7  -3   72.53   11.44
   2   7  -3   61.01   11.95
  -2  -7   2   59.68   10.59
   2   7  -2   60.67   10.76
   2   7  -2   56.05   10.76
  -2  -7   1   23.99    7.81
   2   7  -1   22.03    7.56
   2   7  -1   22.50    7.21
  -2  -7   0   10.59    6.19
   2   7   0   11.10    6.62
   2   7   0   19.64    6.57
  -2  -7  -1    3.37    4.95
   2   7   1   -2.26    3.97
   2   7   1    6.66    4.44
  -2  -7  -2  319.55   19.13
   2   7   2  323.22   20.15
   2   7   2  360.19   15.84
  -2  -7  -3  144.21   14.30
   2   7   3  146.01   14.60
   2   7   3  144.68    9.56
  -2  -7  -4  114.37   13.23
   2   7   4  110.96   13.75
  -2  -7  -5  514.18   26.17
   2   7   5  562.43   27.84
  -2  -7  -6    0.68    1.79
  -2  -7  -6    1.75    4.74
   2   7   6   -2.52    4.10
  -2  -7  -7  211.92   18.44
   2   7   7  205.43   18.49
  -2  -7  -8  194.25   18.83
   2   7   8  157.23   16.52
  -2  -7  -9  248.04    6.36
  -2  -7  -9  254.79   21.73
   2   7   9  281.94   21.82
  -2  -7 -10  152.92   21.64
   2   7  10  134.35   16.39
  -2  -7 -11   29.29   11.44
   2   7  11   46.41   12.85
  -2  -7 -12   -3.03    6.96
   2   7  12   -1.11    7.00
  -2  -7 -13   38.17   14.26
   2   7  13   50.72   13.79
  -2  -7 -14    7.86   10.46
   2   7  14    2.90    8.28
  -2  -7 -15    2.31    8.41
   2   7  15    7.47    8.88
  -2  -7 -16   13.96   12.89
   2   7  16   30.70   12.21
  -2  -7 -17   65.58   20.53
  -2  -7 -18   15.50   13.45
  -2  -7 -19   27.71   17.76
  -2  -7 -20   12.98   14.34
  -2  -7 -21    0.34   11.95
   2   8 -16    2.18   13.15
   2   8 -15    6.62   12.12
   2   8 -14   17.93   14.30
   2   8 -13   30.31   15.63
  -2  -8  12  115.14   22.54
   2   8 -12  104.60   23.31
  -2  -8  11   78.04   16.65
   2   8 -11   43.89   15.88
  -2  -8  10   60.62   14.52
   2   8 -10   51.83   16.56
  -2  -8   9    9.14    8.45
   2   8  -9   29.29   12.76
  -2  -8   8   28.35    9.95
   2   8  -8   43.20   14.52
  -2  -8   7   -1.49    5.59
   2   8  -7    7.04    6.10
   2   8  -7   -2.73    7.30
  -2  -8   6    4.65    6.57
   2   8  -6    7.56    5.89
   2   8  -6    0.26    6.32
  -2  -8   5   -1.79    5.38
   2   8  -5   -1.11    4.87
   2   8  -5    4.06    6.45
  -2  -8   4   79.62   13.23
   2   8  -4  106.99   13.28
   2   8  -4   90.85   16.09
  -2  -8   3    1.88    5.85
   2   8  -3    1.41    5.08
   2   8  -3    6.83    5.93
  -2  -8   2  129.02   14.60
   2   8  -2  137.26   14.34
   2   8  -2  140.33   15.11
  -2  -8   1    4.06    5.42
   2   8  -1   -0.64    5.29
   2   8  -1    4.31    5.29
  -2  -8   0  181.19   16.14
   2   8   0  195.49   16.86
   2   8   0  196.90   15.24
  -2  -8  -1  136.19   14.47
   2   8   1  144.26   14.94
   2   8   1  122.78   11.61
  -2  -8  -2    3.76    5.38
   2   8   2    5.12    5.81
   2   8   2    5.29    4.48
  -2  -8  -3  314.51   21.13
   2   8   3  296.37   21.60
   2   8   3  347.17   15.92
  -2  -8  -4   48.24   10.80
   2   8   4   68.01   13.75
  -2  -8  -5    8.20    6.83
   2   8   5    4.48    6.28
  -2  -8  -6  295.60   10.63
  -2  -8  -6  382.91   24.63
   2   8   6  392.17   25.32
  -2  -8  -7  337.69    9.39
  -2  -8  -7  276.47   22.41
   2   8   7  291.20   22.63
  -2  -8  -8  206.37   20.62
   2   8   8  203.43   19.85
  -2  -8  -9  481.61   30.23
   2   8   9  542.66   31.29
  -2  -8 -10   94.69   18.40
   2   8  10  117.15   20.11
  -2  -8 -11    1.71    7.30
   2   8  11   19.42    9.99
  -2  -8 -12    2.73    8.92
   2   8  12   -3.07    8.32
  -2  -8 -13    9.18    8.97
   2   8  13    1.92    8.92
  -2  -8 -14   25.02   13.53
   2   8  14   24.46   12.04
  -2  -8 -15   13.06   13.58
   2   8  15   20.96   11.95
  -2  -8 -16   28.86   15.16
   2   8  16   29.03   12.72
  -2  -8 -17   27.24   15.50
  -2  -8 -18    6.70   13.75
  -2  -8 -19   11.10   14.64
  -2  -8 -20    2.05   14.94
   2   9 -15    2.43   10.89
   2   9 -14    3.37   10.25
   2   9 -13   18.31   14.00
   2   9 -12    8.45   12.47
  -2  -9  11   66.17   16.52
   2   9 -11   94.82   23.10
  -2  -9  10   21.35   11.06
   2   9 -10   21.39   13.70
  -2  -9   9   26.26   11.27
   2   9  -9   34.92   14.17
  -2  -9   8   49.86   13.19
   2   9  -8   42.56   15.16
  -2  -9   7   27.62   10.63
   2   9  -7   48.37   15.37
  -2  -9   6    3.97    7.56
   2   9  -6   11.95    7.51
   2   9  -6    4.18    7.73
  -2  -9   5   91.06   15.75
   2   9  -5  101.48   15.28
   2   9  -5  119.84   20.66
  -2  -9   4   48.80   12.38
   2   9  -4   57.46   12.55
   2   9  -4   42.05   12.94
  -2  -9   3    9.01    7.39
   2   9  -3    9.01    6.83
   2   9  -3   13.45    8.03
  -2  -9   2   59.73   12.89
   2   9  -2   66.17   13.28
   2   9  -2   61.65   12.76
  -2  -9   1    8.62    7.00
   2   9  -1   20.71    8.75
   2   9  -1    3.46    5.72
  -2  -9   0   54.69   12.17
   2   9   0   39.11   10.97
   2   9   0   35.95    9.43
  -2  -9  -1  210.00   19.00
   2   9   1  211.88   19.47
   2   9   1  204.28   15.71
  -2  -9  -2    3.07    5.76
   2   9   2    2.13    5.46
   2   9   2    5.08    4.95
  -2  -9  -3  217.47   19.64
   2   9   3  182.08   18.40
   2   9   3  250.65   15.16
  -2  -9  -4   -1.71    6.15
   2   9   4    0.38    5.76
  -2  -9  -5  298.16   23.31
   2   9   5  305.59   24.33
  -2  -9  -6  449.63   15.28
  -2  -9  -6  459.45   28.30
   2   9   6  471.70   29.41
  -2  -9  -7   32.15    5.51
  -2  -9  -7   31.04   11.14
   2   9   7   32.36   12.08
  -2  -9  -8  497.11   31.12
   2   9   8  585.44   33.85
  -2  -9  -9   17.55   10.16
   2   9   9   31.68   12.30
  -2  -9 -10    2.73    8.20
   2   9  10    2.73    7.64
  -2  -9 -11   -2.13    7.17
   2   9  11    1.84    8.24
  -2  -9 -12   18.74   11.27
   2   9  12   41.37   14.30
  -2  -9 -13    8.79   10.37
   2   9  13    7.64   10.33
  -2  -9 -14    5.55    9.82
   2   9  14    6.92   11.06
  -2  -9 -15    7.00   11.61
   2   9  15    4.99   10.16
  -2  -9 -16   15.24   13.92
   2   9  16   12.51   11.48
  -2  -9 -17   -4.91   11.78
   2   9  17   -0.77    9.65
  -2  -9 -18   12.98   14.43
  -2  -9 -19   -1.07   12.08
  -2  -9 -20    0.00   14.73
   2  10 -14    2.31   11.87
   2  10 -13    1.84   12.04
   2  10 -12   -3.29   10.63
   2  10 -11   33.09   15.41
  -2 -10  10    7.90   10.12
   2  10 -10    7.39   11.74
  -2 -10   9  155.10   23.22
   2  10  -9  124.19   23.91
  -2 -10   8   -0.60    7.90
   2  10  -8   16.82   12.38
  -2 -10   7   53.92   14.30
   2  10  -7   68.39   18.19
  -2 -10   6   16.74   10.12
   2  10  -6    4.31    8.24
   2  10  -6    2.18    8.03
  -2 -10   5    9.73    8.28
   2  10  -5    4.10    6.62
   2  10  -5   11.31    9.48
  -2 -10   4  135.25   19.72
   2  10  -4  159.80   18.06
   2  10  -4  163.98   23.57
  -2 -10   3    2.90    6.87
   2  10  -3    5.17    6.87
   2  10  -3    9.14    7.90
  -2 -10   2   64.51   13.92
   2  10  -2   60.67   13.58
   2  10  -2   65.36   14.64
  -2 -10   1    5.46    9.26
   2  10  -1    9.78    9.56
   2  10  -1    7.68    7.39
  -2 -10   0   18.83    9.78
   2  10   0   10.33    8.62
   2  10   0   10.80    7.26
  -2 -10  -1   42.39   11.83
   2  10   1   35.01   11.27
   2  10   1   37.87    9.78
  -2 -10  -2   15.33    8.97
   2  10   2   21.73    9.65
   2  10   2   31.89    8.79
  -2 -10  -3  110.36   17.97
   2  10   3  140.20   20.96
  -2 -10  -4   10.37    7.90
   2  10   4   21.60    9.73
  -2 -10  -5  395.03   27.75
   2  10   5  454.76   30.14
  -2 -10  -6   14.60    6.40
  -2 -10  -6   -2.01    6.32
   2  10   6   17.59   10.50
  -2 -10  -7  272.46   25.06
   2  10   7  260.21   24.59
  -2 -10  -8   -1.07    6.70
   2  10   8   -3.97    6.19
  -2 -10  -9   53.54   15.11
   2  10   9   46.88   14.94
  -2 -10 -10   35.56   13.62
   2  10  10   35.99   13.49
  -2 -10 -11    6.19   10.03
   2  10  11    4.53   11.74
  -2 -10 -12  252.27   27.75
   2  10  12  238.69   26.38
  -2 -10 -13   38.47   14.73
   2  10  13   39.11   14.43
  -2 -10 -14   35.43   16.18
   2  10  14   15.92   13.11
  -2 -10 -15   25.02   13.87
   2  10  15   10.08   11.23
  -2 -10 -16   -9.48   11.19
   2  10  16    2.09   11.91
  -2 -10 -17    7.34   13.79
   2  10  17   -0.30   10.63
  -2 -10 -18    3.54   12.51
  -2 -10 -19    3.16   15.33
   2  11 -13   -6.53   11.70
   2  11 -12    3.33   12.94
   2  11 -11    9.35   12.51
   2  11 -10   58.92   20.11
  -2 -11   9    0.60    9.52
   2  11  -9   -0.30    8.97
  -2 -11   8   43.89   15.16
   2  11  -8   50.93   17.33
  -2 -11   7   45.55   13.96
   2  11  -7   33.51   14.47
  -2 -11   6    4.18    9.56
   2  11  -6   12.30   11.19
  -2 -11   5    1.07    8.24
   2  11  -5   15.97   10.50
   2  11  -5    9.31    8.92
  -2 -11   4   10.37    9.39
   2  11  -4    6.10    8.71
   2  11  -4   -0.68    8.03
  -2 -11   3    5.76    8.88
   2  11  -3   -2.22    7.43
   2  11  -3   10.25    9.22
  -2 -11   2   17.93    9.61
   2  11  -2   26.90   11.53
   2  11  -2   30.65   11.91
  -2 -11   1    7.94    8.45
   2  11  -1    3.80    8.24
   2  11  -1    2.35    7.04
  -2 -11   0    7.09    9.56
   2  11   0    2.13    9.61
   2  11   0    8.97    7.56
  -2 -11  -1   52.77   14.69
   2  11   1   51.53   14.90
   2  11   1   40.60   11.14
  -2 -11  -2  165.52   19.60
   2  11   2  174.40   20.58
   2  11   2  201.12   17.85
  -2 -11  -3   -0.90    7.98
   2  11   3    0.81    7.30
   2  11   4  373.98   29.80
  -2 -11  -5   -7.00    7.94
   2  11   5    6.57    8.37
  -2 -11  -6  234.85   23.82
   2  11   6  241.25   26.43
  -2 -11  -7   14.22    9.69
   2  11   7    7.13    9.18
  -2 -11  -8   14.17    9.65
   2  11   8   25.15   11.95
  -2 -11  -9   72.06   17.46
   2  11   9   87.73   21.09
  -2 -11 -10   32.19   14.56
   2  11  10   31.29   14.86
  -2 -11 -11   82.14   19.21
   2  11  11   74.97   20.41
  -2 -11 -12   23.48   13.15
   2  11  12   22.20   14.22
  -2 -11 -13    1.11    9.90
   2  11  13   12.17   11.44
  -2 -11 -14   32.28   16.56
   2  11  14   21.43   15.45
  -2 -11 -15    7.64   12.98
   2  11  15   17.12   14.00
  -2 -11 -16    8.24   13.28
   2  11  16   11.70   13.70
  -2 -11 -17   17.08   17.03
   2  11  17   27.62   17.03
  -2 -11 -18   -8.67   12.55
   2  11  18   -3.12   13.19
   2  12 -12   -3.33   12.25
   2  12 -11   37.74   18.74
   2  12 -10   11.61   15.16
   2  12  -9    2.90   12.59
  -2 -12   8   23.69   13.41
   2  12  -8   14.17   12.64
  -2 -12   7   29.80   13.32
   2  12  -7    3.20   10.20
  -2 -12   6   31.81   13.58
   2  12  -6   40.26   16.65
  -2 -12   5    9.95   11.01
   2  12  -5   25.96   13.79
  -2 -12   4   -3.37    8.41
   2  12  -4    8.07   10.12
   2  12  -4   10.20   10.76
  -2 -12   3   16.18   10.97
   2  12  -3   16.65   11.14
   2  12  -3    3.71    8.75
  -2 -12   2   34.41   13.92
   2  12  -2   27.75   12.30
   2  12  -2   17.20   10.54
  -2 -12   1   18.14   10.97
   2  12  -1    7.30   10.29
   2  12  -1   10.97    9.05
  -2 -12   0   31.34   13.70
   2  12   0   27.92   13.75
   2  12   0   32.02   11.83
  -2 -12  -1   87.43   19.72
   2  12   1  106.05   20.88
   2  12   1  105.88   17.42
  -2 -12  -2   22.50   12.68
   2  12   2   30.27   12.72
  -2 -12  -3  204.15   24.93
   2  12   3  265.37   27.71
  -2 -12  -4   40.77   14.94
   2  12   4    9.95   10.37
  -2 -12  -5  105.41   20.49
   2  12   5  146.31   25.57
  -2 -12  -6    2.99    8.62
   2  12   6   14.43   12.17
  -2 -12  -7   81.11   20.15
   2  12   7   64.76   18.61
  -2 -12  -8   66.17   17.67
   2  12   8   96.31   22.03
  -2 -12  -9   -0.34    9.61
   2  12   9    1.71   10.59
  -2 -12 -10   24.68   13.11
   2  12  10   14.43   12.17
  -2 -12 -11   16.48   13.28
   2  12  11   41.71   17.29
  -2 -12 -12    4.70   10.50
   2  12  12    3.59   12.12
  -2 -12 -13   40.47   17.16
   2  12  13   23.91   16.18
  -2 -12 -14   30.10   18.02
   2  12  14   54.77   19.47
  -2 -12 -15    8.84   14.56
   2  12  15    1.58   11.01
  -2 -12 -16   22.07   18.70
   2  12  16   12.76   15.67
  -2 -12 -17   19.68   16.22
   2  12  17   12.76   15.41
   2  12  18   -0.55   14.17
   2  13 -10    6.87   14.81
   2  13  -9  -10.25   10.67
   2  13  -8    4.44   13.45
  -2 -13   7   10.42   12.51
   2  13  -7   10.42   13.06
  -2 -13   6    6.66   10.84
   2  13  -6   25.66   14.90
  -2 -13   5    8.58   11.70
   2  13  -5   11.10   11.40
  -2 -13   4    2.82    9.82
   2  13  -4    4.48   12.76
   2  13  -4    9.78   11.10
  -2 -13   3   -8.88    8.79
   2  13  -3    7.13   11.44
   2  13  -3    1.54    8.92
  -2 -13   2   -1.58    8.11
   2  13  -2   -2.60    9.39
   2  13  -2    4.53    8.50
  -2 -13   1    2.90    9.52
   2  13  -1   10.80   11.57
   2  13  -1    5.51    8.75
  -2 -13   0   22.11   13.75
   2  13   0   48.37   16.05
   2  13   0   16.31   10.37
  -2 -13  -1    2.52    9.14
   2  13   1    6.62   11.70
   2  13   1    7.64    8.07
  -2 -13  -2   68.95   18.27
   2  13   2   66.56   19.13
  -2 -13  -3   -5.46    9.31
   2  13   3    5.93   11.40
  -2 -13  -4    2.52    9.52
   2  13   4   20.45   13.02
  -2 -13  -5   23.31   12.76
   2  13   5   27.32   13.53
  -2 -13  -6    4.95   11.01
   2  13   6    4.82   10.37
  -2 -13  -7  228.74   28.43
   2  13   7  273.96   31.04
  -2 -13  -8   -9.09    7.00
   2  13   8    2.82   10.84
  -2 -13  -9  116.98   23.86
   2  13   9  119.24   24.63
  -2 -13 -10   27.07   13.96
   2  13  10   20.96   14.52
  -2 -13 -11    1.15   10.89
   2  13  11    6.02   12.68
  -2 -13 -12    2.95   11.44
   2  13  12   -1.24   11.87
  -2 -13 -13   75.91   23.14
   2  13  13   51.53   19.98
  -2 -13 -14   -0.68   11.31
   2  13  14   -4.18   12.34
  -2 -13 -15   22.50   16.78
   2  13  15   19.64   15.67
  -2 -13 -16   17.72   16.09
   2  13  16    2.77   15.71
   2  13  17   -3.76   15.75
   2  13  18   -7.26   15.37
   2  14  -9   -0.64   14.34
   2  14  -8    1.96   12.00
   2  14  -7   -1.58   12.25
  -2 -14   6    3.67   13.23
   2  14  -6    2.77   10.76
  -2 -14   5   -0.21   11.06
   2  14  -5   -3.16   11.10
  -2 -14   4   14.77   12.98
   2  14  -4   20.41   13.62
  -2 -14   3    1.32   10.80
   2  14  -3    3.67   12.25
   2  14  -3    1.58   10.16
  -2 -14   2   19.13   14.05
   2  14  -2   13.28   13.28
   2  14  -2   13.23   11.78
  -2 -14   1    7.00   12.59
   2  14  -1    8.24   13.79
   2  14  -1    7.51   10.42
  -2 -14   0   27.54   14.81
   2  14   0   17.29   13.02
  -2 -14  -1   65.96   18.10
   2  14   1  109.76   23.48
  -2 -14  -2   11.95   12.59
   2  14   2    5.12   10.50
  -2 -14  -3   23.91   14.09
   2  14   3   20.66   14.34
  -2 -14  -4    4.82   10.33
   2  14   4   11.78   12.04
  -2 -14  -5   15.16   13.92
   2  14   5   28.90   16.18
  -2 -14  -6   43.72   17.76
   2  14   6   36.20   16.56
  -2 -14  -7   24.89   15.24
   2  14   7   27.92   16.78
  -2 -14  -8  104.34   24.55
   2  14   8   82.05   23.40
  -2 -14  -9   19.17   13.70
   2  14   9   27.28   16.27
  -2 -14 -10    2.95   10.76
   2  14  10   -7.90    9.48
  -2 -14 -11  -13.23   11.06
   2  14  11    9.09   12.59
  -2 -14 -12   20.07   15.33
   2  14  12   23.44   15.92
  -2 -14 -13    8.58   14.52
   2  14  13   18.10   18.02
  -2 -14 -14   31.38   17.63
   2  14  14   41.75   19.77
  -2 -14 -15   -4.35   16.52
   2  14  15   -2.05   15.33
   2  14  16    4.87   16.01
   2  15  -8    9.18   15.41
   2  15  -7    9.78   13.87
   2  15  -6    8.32   13.45
  -2 -15   5    6.10   15.37
   2  15  -5    8.54   13.49
  -2 -15   4   -4.35   13.62
   2  15  -4   -2.22   11.57
  -2 -15   3   46.62   19.13
   2  15  -3   32.28   15.92
  -2 -15   2   -5.21   12.55
   2  15  -2    1.79   15.58
  -2 -15   1   21.60   15.33
   2  15  -1   17.16   16.52
  -2 -15   0   13.02   13.23
   2  15   0   17.50   14.77
  -2 -15  -1    0.81   11.14
   2  15   1    3.63   13.75
  -2 -15  -2   15.45   12.98
   2  15   2    0.13   11.61
  -2 -15  -3   35.39   17.08
   2  15   3   34.71   17.20
  -2 -15  -4   -3.42   11.48
   2  15   4    7.34   14.39
  -2 -15  -5   31.59   16.05
   2  15   5   17.42   15.07
  -2 -15  -6   36.54   17.59
   2  15   6   45.47   19.98
  -2 -15  -7   18.44   14.00
   2  15   7   18.44   16.95
  -2 -15  -8   28.39   16.48
   2  15   8   14.77   15.67
  -2 -15  -9   -3.42   12.38
   2  15   9    4.65   15.37
  -2 -15 -10    2.86   13.19
   2  15  10    8.50   15.20
  -2 -15 -11   28.05   18.40
   2  15  11   22.71   18.83
  -2 -15 -12  -11.70   10.97
   2  15  12   10.25   16.09
  -2 -15 -13   11.57   17.46
   2  15  13   16.01   17.59
  -2 -15 -14   -7.13   26.04
   2  15  14    5.42   16.01
   2  16  -6    4.10   14.94
   2  16  -5   -1.15   12.25
  -2 -16   3   -2.90   14.13
  -2 -16   2   17.42   15.67
  -2 -16   1   22.71   16.56
   2  16  -1   -3.84   15.63
  -2 -16   0   -0.98   15.11
   2  16   0   19.34   20.49
  -2 -16  -1   -2.77   13.75
   2  16   1   20.83   20.15
  -2 -16  -2   16.61   15.84
   2  16   2   18.57   18.91
  -2 -16  -3   -4.14   13.45
   2  16   3   21.69   19.64
  -2 -16  -4   29.37   17.33
   2  16   4   44.57   22.88
  -2 -16  -5   37.10   19.17
   2  16   5   58.40   24.21
  -2 -16  -6   -3.97   12.98
   2  16   6   -3.16   13.83
  -2 -16  -7   -1.49   13.70
   2  16   7   24.85   21.00
  -2 -16  -8    0.21   12.34
   2  16   8   12.64   17.08
  -2 -16  -9    7.17   13.36
   2  16   9   -0.47   13.62
  -2 -16 -10   16.52   16.05
   2  16  10    9.18   17.55
  -2 -16 -11  -18.87   12.34
   2  16  11    2.13   15.41
  -2 -17   2    9.01   16.56
  -2 -17   1    4.53   15.92
  -2 -17   0   -1.20   14.52
   2  17   0   -0.43   16.82
  -2 -17  -1   20.32   17.16
   2  17   1   -0.04   17.85
  -2 -17  -2   12.42   16.82
   2  17   2   62.50   25.49
  -2 -17  -3   -5.93   13.28
   2  17   3   29.97   21.47
  -2 -17  -4   -2.56   14.81
   2  17   4   14.77   21.43
  -2 -17  -5   -2.60   13.75
   2  17   5    6.40   17.08
  -2 -17  -6    5.72   14.47
   2  17   6   25.19   20.02
  -2 -17  -7    6.45   13.70
   2  17   7    2.31   17.42
  -2 -17  -8   -4.01   13.79
   2  17   8   11.31   19.51
  -2 -17  -9   14.56   18.19
  -2 -18   0    2.48   24.25
  -2 -18  -1   -9.52   15.54
   2  18   1    0.38   19.38
  -2 -18  -2   -8.75   13.62
   2  18   2    5.93   22.20
  -2 -18  -3   -9.31   20.45
  -3  16   1    0.51   16.95
  -3  15   6   16.86   28.86
  -3  15   5   11.01   16.48
  -3  15   4    1.41   17.33
   3 -15  -4   13.02   21.26
  -3  15   3    5.72   17.97
   3 -15  -3   21.82   18.74
  -3  15   2   -5.21   16.14
   3 -15  -2    9.99   18.78
  -3  15   1   16.18   18.53
   3 -15  -1   22.07   20.45
  -3  15   0   -8.67   13.53
   3 -15   0   21.52   18.27
   3 -15   1    9.31   20.83
  -3  14   9   -4.35   15.88
   3 -14  -9    7.56   16.65
  -3  14   8   -0.43   15.50
   3 -14  -8   12.04   14.52
  -3  14   7   14.98   18.66
   3 -14  -7    8.50   18.36
  -3  14   6   20.88   18.44
   3 -14  -6   12.72   18.49
  -3  14   5   -6.02   14.60
   3 -14  -5   10.50   15.92
  -3  14   4   26.55   19.68
   3 -14  -4   58.27   25.79
  -3  14   3   -3.20   14.98
   3 -14  -3    4.44   15.41
  -3  14   2   -5.29   17.20
   3 -14  -2   17.80   17.93
  -3  14   1    1.75   15.75
   3 -14  -1   17.38   19.81
  -3  14   0   -9.82   14.30
   3 -14   0    7.68   15.80
  -3  14  -1   -7.04   12.34
   3 -14   1    2.35   14.94
   3 -14   2   46.75   22.07
   3 -14   3    4.65   16.69
   3 -14   4   -6.92   15.45
   3 -14   5   -3.03   14.60
   3 -14   6  -11.36   14.77
  -3  13  11    3.20   14.56
   3 -13 -11   -0.34   14.73
  -3  13  10    0.30   13.49
   3 -13 -10   -0.94   13.92
  -3  13   9    4.78   14.81
   3 -13  -9    4.06   16.86
  -3  13   8   -3.67   15.16
   3 -13  -8    3.67   13.15
  -3  13   7   44.95   20.36
   3 -13  -7    4.95   15.45
  -3  13   6   36.93   19.04
   3 -13  -6   13.41   16.01
  -3  13   5   33.04   18.27
   3 -13  -5   49.74   19.81
  -3  13   4   24.42   16.91
   3 -13  -4   18.66   16.39
  -3  13   3   -6.49   11.01
   3 -13  -3   11.19   10.63
   3 -13  -3   -0.13   13.36
  -3  13   2   47.47   18.70
   3 -13  -2   79.36   24.42
  -3  13   1    1.37   12.72
   3 -13  -1  -11.57   10.42
  -3  13   0   26.51   16.27
   3 -13   0   36.84   17.97
  -3  13  -1    8.41   13.32
   3 -13   1   11.87   15.24
  -3  13  -2   -8.24   11.78
   3 -13   2    0.90   12.25
   3 -13   3   22.75   18.61
   3 -13   4    7.90   14.09
   3 -13   5    4.95   15.37
   3 -13   6   -3.24   13.96
   3 -13   7    2.22   15.24
   3 -13   8   -3.07   14.00
   3 -13   9    8.97   17.89
  -3  12  13   14.81   15.03
   3 -12 -13   11.91   14.39
  -3  12  12    9.73   13.49
   3 -12 -12   -4.14   11.87
  -3  12  11   -1.07   14.09
   3 -12 -11    3.33   13.75
  -3  12  10   40.69   20.71
   3 -12 -10   40.34   19.13
  -3  12   9    0.94   14.69
   3 -12  -9    4.01   16.05
  -3  12   8   73.13   23.10
   3 -12  -8   90.64   25.44
  -3  12   7    1.66   11.91
   3 -12  -7    6.45   13.28
  -3  12   6   61.48   21.52
   3 -12  -6   55.16   21.86
  -3  12   5    7.90   15.20
   3 -12  -5   24.55   16.31
  -3  12   4   18.10   14.81
   3 -12  -4    4.18    9.52
   3 -12  -4   -0.47   12.08
  -3  12   3   61.01   21.18
   3 -12  -3   51.74   14.81
   3 -12  -3   75.22   22.58
  -3  12   2    8.79   14.30
   3 -12  -2    1.49   13.19
  -3  12   1   13.75   14.43
   3 -12  -1   25.70   17.12
  -3  12   0  -10.97   10.97
   3 -12   0  -11.01    9.99
  -3  12  -1   -6.10   12.04
   3 -12   1   -6.40   12.72
  -3  12  -2    3.80   12.25
   3 -12   2   10.03   12.72
  -3  12  -3   -4.14    9.52
   3 -12   3    6.28   12.25
   3 -12   4   11.01   14.30
   3 -12   5    5.89   13.15
   3 -12   6    5.29   14.22
   3 -12   7    1.75   13.02
   3 -12   8   -1.88   14.13
   3 -12   9    2.05   14.00
   3 -12  10    1.07   12.94
   3 -12  11    5.25   15.58
  -3  11  15   27.92   17.46
   3 -11 -15   28.39   17.85
  -3  11  14   -1.66   13.45
   3 -11 -14   20.32   15.80
  -3  11  13   17.29   15.20
   3 -11 -13   13.36   14.22
  -3  11  12   -0.30   13.58
   3 -11 -12   -0.38   10.25
  -3  11  11   -5.17   10.72
   3 -11 -11    1.11   11.53
  -3  11  10   -2.01   11.10
   3 -11 -10    6.10   11.78
  -3  11   9   65.70   20.11
   3 -11  -9   75.78   23.18
  -3  11   8   18.23   14.86
   3 -11  -8    9.26   14.47
  -3  11   7   33.47   15.75
   3 -11  -7   31.21   17.89
  -3  11   6   28.99   14.90
   3 -11  -6   48.16   13.62
   3 -11  -6   35.78   17.55
  -3  11   5    7.13   12.25
   3 -11  -5   -0.85    7.00
   3 -11  -5   16.05   12.85
  -3  11   4   88.12   21.35
   3 -11  -4  112.32   19.68
   3 -11  -4   80.56   21.39
  -3  11   3   -1.41    8.79
   3 -11  -3    6.83    8.71
   3 -11  -3   -1.54   11.06
  -3  11   2   15.16   11.78
   3 -11  -2    5.68   13.32
  -3  11   1    9.09   11.31
   3 -11  -1   -1.24    9.35
  -3  11   0   -3.33    9.05
   3 -11   0   -1.62    9.69
  -3  11  -1   -7.60    7.09
   3 -11   1  -10.42    7.43
  -3  11  -2   -2.52    9.39
   3 -11   2    1.79    9.95
  -3  11  -3    8.97   10.50
   3 -11   3    2.82   10.20
  -3  11  -4    8.62   10.89
   3 -11   4    7.47   11.23
   3 -11   5   27.88   15.92
   3 -11   6   18.74   13.62
   3 -11   7   -3.63   10.42
   3 -11   8    2.82   12.38
   3 -11   9    9.18   13.06
   3 -11  10   13.15   14.05
  -3  11 -11   12.21   13.11
   3 -11  11    3.42   13.75
  -3  11 -12   57.85   24.33
   3 -11  12   28.77   20.28
   3 -11  13    0.81   13.23
  -3  10  17    4.61   14.17
  -3  10  16   -2.26   12.04
   3 -10 -16    8.58   13.23
  -3  10  15    4.35   14.26
   3 -10 -15    7.43   14.30
  -3  10  14    2.56   11.57
   3 -10 -14    0.26   11.40
  -3  10  13   -9.18    8.79
   3 -10 -13    3.59   10.12
  -3  10  12   -0.94    9.86
   3 -10 -12    1.54   10.12
  -3  10  11   10.29   13.11
   3 -10 -11    8.41   10.20
  -3  10  10   43.93   19.04
   3 -10 -10   29.67   14.26
  -3  10   9   -4.01    9.05
   3 -10  -9    7.13   11.27
  -3  10   8    0.21    9.14
   3 -10  -8   -6.79    7.04
   3 -10  -8   -4.91    8.20
  -3  10   7  148.78   26.43
   3 -10  -7  138.71   20.79
   3 -10  -7  137.60   25.15
  -3  10   6   -0.17   12.00
   3 -10  -6    5.55    8.03
   3 -10  -6   25.70   14.39
  -3  10   5  214.74   26.81
   3 -10  -5  228.87   22.24
   3 -10  -5  212.61   26.26
  -3  10   4   18.53   12.47
   3 -10  -4    5.04    7.77
   3 -10  -4    3.80   10.46
  -3  10   3  156.08   26.60
   3 -10  -3  162.40   19.94
   3 -10  -3  129.27   23.69
  -3  10   2   16.52   11.57
   3 -10  -2    4.74   11.14
  -3  10   1   -2.39   10.54
   3 -10  -1   12.72   13.23
  -3  10   0    4.27   11.06
   3 -10   0   13.53   11.48
  -3  10  -1   48.63   14.94
   3 -10   1   55.29   17.93
  -3  10  -2    9.31   11.57
   3 -10   2   19.38   12.64
  -3  10  -3    2.82    9.69
   3 -10   3    6.36   11.31
  -3  10  -4   13.45   10.76
   3 -10   4   11.91   11.61
  -3  10  -5   -3.80   10.72
   3 -10   5   -1.75    8.50
   3 -10   6    5.38   11.36
   3 -10   7    1.66   10.12
   3 -10   8   -3.07   11.01
  -3  10  -9   26.13   15.97
   3 -10   9   15.92   13.45
  -3  10 -10   14.26   14.26
   3 -10  10   19.00   15.75
  -3  10 -11   11.53   11.70
   3 -10  11   16.52   13.15
  -3  10 -12    1.71   11.19
   3 -10  12   12.68   14.34
  -3  10 -13   11.01   13.41
   3 -10  13  -10.16   11.14
   3 -10  14   19.47   16.35
  -3   9  17   10.25   12.81
   3  -9 -17   -0.94   12.00
  -3   9  16    2.86   11.87
   3  -9 -16   -5.08   11.83
  -3   9  15   -2.73   11.57
   3  -9 -15    1.11   10.67
  -3   9  14   16.09   13.32
   3  -9 -14    7.04   12.30
  -3   9  13   23.10   14.73
   3  -9 -13   24.29   13.41
  -3   9  12   18.23   13.23
   3  -9 -12    8.62   10.89
  -3   9  11   55.12   17.85
   3  -9 -11   53.07   17.59
  -3   9  10   11.53   12.21
   3  -9 -10    4.99    8.79
  -3   9   9    4.95   10.63
   3  -9  -9    4.87    7.43
   3  -9  -9    9.69   10.25
  -3   9   8  164.24   27.62
   3  -9  -8  134.18   19.89
   3  -9  -8  161.72   27.37
  -3   9   7   60.92   18.53
   3  -9  -7   67.75   14.81
   3  -9  -7   63.74   18.23
  -3   9   6  138.07   25.19
   3  -9  -6  118.73   18.36
   3  -9  -6  181.74   27.54
  -3   9   5   52.04   15.97
   3  -9  -5   72.53   15.03
   3  -9  -5   72.66   19.13
  -3   9   4  108.82   20.79
   3  -9  -4  130.85   19.51
   3  -9  -4  129.10   22.63
  -3   9   3   63.23   16.61
   3  -9  -3   65.02   14.73
   3  -9  -3   75.65   17.46
  -3   9   2   30.06   13.28
   3  -9  -2   20.49   12.00
  -3   9   1  226.44   24.42
   3  -9  -1  204.75   25.06
  -3   9   0   29.88   13.70
   3  -9   0   36.84   13.41
  -3   9  -1  109.38   19.85
   3  -9   1  109.76   20.71
  -3   9  -2   13.92    8.45
   3  -9   2    8.11    9.52
  -3   9  -3  135.85   20.24
   3  -9   3  182.94   26.98
  -3   9  -4    1.24    9.82
   3  -9   4   16.78   11.48
  -3   9  -5    5.12    8.11
   3  -9   5   15.84   11.23
   3  -9   6  127.56   23.40
  -3   9  -7   -4.78    8.37
   3  -9   7   -1.41    8.62
  -3   9  -8   87.01   20.71
   3  -9   8   97.38   21.18
  -3   9  -9    3.93   10.20
   3  -9   9   -3.29   10.16
  -3   9 -10   12.21   12.64
   3  -9  10   29.84   16.35
  -3   9 -11    3.59    9.95
   3  -9  11    8.32   11.57
  -3   9 -12    2.86   12.17
   3  -9  12   -5.64    9.82
  -3   9 -13    9.86   11.48
   3  -9  13    4.57   12.94
  -3   9 -14   11.10   14.77
   3  -9  14   10.76   14.05
   3  -9  15   21.56   16.31
   3  -8 -18   -7.43   10.59
  -3   8  17    6.40   11.95
   3  -8 -17   -0.51   12.47
  -3   8  16   12.30   13.36
   3  -8 -16   -4.23    8.88
  -3   8  15   -8.32   10.12
   3  -8 -15   -4.01    9.90
  -3   8  14   25.27   14.94
   3  -8 -14    2.48   11.40
  -3   8  13    4.82   11.70
   3  -8 -13    4.99   10.16
  -3   8  12   26.73   13.92
   3  -8 -12   41.62   15.11
  -3   8  11    7.77    9.61
   3  -8 -11    2.95    7.51
  -3   8  10    7.77   10.20
   3  -8 -10    5.51    8.11
   3  -8 -10    3.16    8.62
  -3   8   9  147.16   25.23
   3  -8  -9  130.04   18.91
   3  -8  -9   97.42   19.25
  -3   8   8   36.50   14.77
   3  -8  -8   44.70   11.83
   3  -8  -8   50.38   14.64
  -3   8   7   51.23   16.18
   3  -8  -7   41.41   11.91
   3  -8  -7   28.56   11.70
  -3   8   6  102.55   21.35
   3  -8  -6   97.51   16.31
   3  -8  -6   99.13   20.32
  -3   8   5   -0.30    7.64
   3  -8  -5   -1.28    5.42
   3  -8  -5    1.84    8.45
  -3   8   4  161.72   24.12
   3  -8  -4  166.54   17.80
   3  -8  -4  161.89   23.61
  -3   8   3  -10.37    6.70
   3  -8  -3    1.24    6.66
   3  -8  -3    7.81   10.03
  -3   8   2  505.69   31.93
   3  -8  -2  555.04   33.73
  -3   8   1   33.30   12.17
   3  -8  -1   37.48   12.30
  -3   8   0  536.13   32.02
   3  -8   0  492.84   31.76
  -3   8  -1   32.40   12.81
   3  -8   1   21.13    9.65
  -3   8  -2   16.14    9.52
   3  -8   2   17.97   10.33
  -3   8  -3   73.73   14.47
   3  -8   3   98.83   19.98
  -3   8  -4   87.86   15.45
   3  -8   4   69.59   16.18
  -3   8  -5   -4.74    5.51
   3  -8   5    0.34    7.73
  -3   8  -6    0.13    5.93
  -3   8  -6    2.65    7.94
   3  -8   6    9.09   10.42
  -3   8  -7  196.21   28.56
   3  -8   7  169.87   25.19
  -3   8  -8   26.30   12.81
   3  -8   8   27.92   12.89
  -3   8  -9   28.09   14.09
   3  -8   9   20.96   13.36
  -3   8 -10   62.71   18.44
   3  -8  10   46.79   15.88
  -3   8 -11   -7.56    7.56
   3  -8  11    0.77   11.10
  -3   8 -12    0.34    9.65
   3  -8  12   16.86   13.62
  -3   8 -13    3.63   10.12
   3  -8  13   -1.20   10.84
  -3   8 -14   13.58   13.41
   3  -8  14   11.87   13.70
  -3   8 -15   22.50   16.69
   3  -8  15   22.75   16.31
  -3   8 -16    5.81   15.28
   3  -8  16   10.97   14.13
   3  -8  17    1.24   14.22
   3  -7 -19    1.32   13.58
   3  -7 -18    7.13   11.95
  -3   7  17   16.39   19.68
   3  -7 -17   15.24   13.58
  -3   7  16    7.86    9.61
   3  -7 -16    2.09   10.93
  -3   7  15   25.87   13.92
   3  -7 -15   24.59   13.79
  -3   7  14    4.74   10.93
   3  -7 -14   -0.13    9.82
  -3   7  13    3.07   10.16
   3  -7 -13   -0.30    8.32
  -3   7  12   19.47   11.23
   3  -7 -12   23.05    9.65
   3  -7 -12   27.54   13.28
  -3   7  11    8.71   10.67
   3  -7 -11    5.51    7.43
   3  -7 -11    5.64    9.26
  -3   7  10   42.73   15.54
   3  -7 -10   32.87   11.06
   3  -7 -10   31.63   12.25
  -3   7   9   -6.70    8.03
   3  -7  -9    7.09    7.34
   3  -7  -9    5.29    8.45
  -3   7   8  291.33   27.66
   3  -7  -8  301.62   22.54
   3  -7  -8  338.59   28.18
  -3   7   7  339.53   28.30
   3  -7  -7  289.41   22.20
   3  -7  -7  287.66   25.66
  -3   7   6  101.91   20.02
   3  -7  -6   94.09   15.33
   3  -7  -6   70.74   15.16
  -3   7   5  153.78   22.37
   3  -7  -5  161.25   16.65
   3  -7  -5  134.05   20.49
  -3   7   4  243.00   22.33
   3  -7  -4  262.21   20.41
   3  -7  -4  233.87   22.24
  -3   7   3  167.61   18.74
   3  -7  -3  149.04   16.31
   3  -7  -3  126.92   19.34
  -3   7   2   70.40   15.28
   3  -7  -2   57.38   13.45
  -3   7   1  563.36   30.99
   3  -7  -1  584.84   32.15
  -3   7   0    7.81    7.09
   3  -7   0   -4.06    5.72
  -3   7  -1  340.21   23.48
   3  -7   1  295.86   23.91
  -3   7  -2  118.73   14.81
   3  -7   2  134.18   20.15
  -3   7  -3   51.87   11.48
   3  -7   3   68.31   14.90
  -3   7  -4    5.12    6.15
   3  -7   4   -1.66    6.75
  -3   7  -5   -8.15    4.40
   3  -7   5   -0.26    6.45
  -3   7  -6   36.93    8.92
  -3   7  -6   31.81   11.70
   3  -7   6   35.14   12.81
  -3   7  -7    6.06    9.95
  -3   7  -7   19.85   10.20
   3  -7   7   25.23   12.12
  -3   7  -8   23.14   12.76
   3  -7   8   18.14   10.76
  -3   7  -9  109.85   21.39
   3  -7   9  118.47   22.11
  -3   7 -10   35.09   14.47
   3  -7  10   54.30   16.27
  -3   7 -11   57.16   17.76
   3  -7  11   55.59   16.52
  -3   7 -12   27.11   12.89
   3  -7  12   15.63   12.21
  -3   7 -13   16.99   12.72
   3  -7  13   16.18   12.08
  -3   7 -14   -0.64    9.69
   3  -7  14   -1.79    8.75
  -3   7 -15   -1.07    9.82
   3  -7  15   13.66   12.17
  -3   7 -16    6.15   11.65
   3  -7  16   14.30   15.84
  -3   7 -17   11.61   13.96
   3  -7  17    6.66   14.77
   3  -7  18   24.63   25.36
   3  -6 -18   38.64   18.14
   3  -6 -17    0.30   11.57
  -3   6  16   51.23   16.18
   3  -6 -16   51.61   17.93
  -3   6  15    4.27    8.79
   3  -6 -15   -3.54    8.88
  -3   6  14    4.31   10.03
   3  -6 -14   -0.13    8.79
  -3   6  13   19.38   11.36
   3  -6 -13    2.43    7.60
   3  -6 -13    1.49    8.32
  -3   6  12   27.88   12.59
   3  -6 -12   18.74    9.48
   3  -6 -12   12.42    9.73
  -3   6  11   39.92   14.81
   3  -6 -11   40.64   12.04
   3  -6 -11   33.47   12.30
  -3   6  10   61.99   15.54
   3  -6 -10   37.48   11.31
   3  -6 -10   35.78   12.98
  -3   6   9  254.79   24.97
   3  -6  -9  252.57   21.26
   3  -6  -9  216.71   22.67
  -3   6   8    1.07    7.09
   3  -6  -8    9.99    7.56
   3  -6  -8    8.50    7.51
  -3   6   7    1.02    7.64
   3  -6  -7   -5.64    4.48
   3  -6  -7    1.79    6.06
  -3   6   6  352.21   26.00
   3  -6  -6  333.38   22.16
   3  -6  -6  347.98   24.89
  -3   6   5  180.93   19.30
   3  -6  -5  170.68   16.31
   3  -6  -5  176.57   19.04
  -3   6   4    3.97    6.28
   3  -6  -4    0.13    5.42
   3  -6  -4   -5.25    5.21
  -3   6   3  385.17   25.53
   3  -6  -3  503.34   26.13
   3  -6  -3  373.47   25.15
  -3   6   2   -0.77    5.42
   3  -6  -2    5.17    6.19
   3  -6  -2   -2.39    4.95
  -3   6   1    6.23    6.45
   3  -6  -1   13.70    7.68
  -3   6   0   17.93    7.81
   3  -6   0   17.63    8.24
  -3   6  -1  229.43   18.36
   3  -6   1  259.01   21.43
  -3   6  -2  107.88   13.28
   3  -6   2  107.46   16.82
  -3   6  -3   16.31    7.09
   3  -6   3   14.52    8.79
  -3   6  -4   47.64   10.29
   3  -6   4   58.02   13.28
  -3   6  -5    6.36    5.04
  -3   6  -5   10.12    7.60
   3  -6   5   15.58    8.75
  -3   6  -6   38.64    8.28
  -3   6  -6   34.45   11.70
   3  -6   6   43.38   12.94
  -3   6  -7    0.81    3.76
  -3   6  -7   -3.97    6.66
   3  -6   7    1.15    6.92
  -3   6  -8   20.58   10.54
   3  -6   8   21.64   10.25
  -3   6  -9  175.51   25.49
   3  -6   9  122.53   20.24
  -3   6 -10  204.62   23.95
   3  -6  10  184.94   22.88
  -3   6 -11  145.92   26.00
   3  -6  11   96.91   20.53
  -3   6 -12   18.23   11.36
   3  -6  12   24.25   13.19
  -3   6 -13   10.59   11.44
   3  -6  13   15.33   11.01
  -3   6 -14   -1.88    8.41
   3  -6  14    1.84    8.92
  -3   6 -15    3.76   10.03
   3  -6  15   -2.31   10.03
  -3   6 -16  -13.87    8.71
   3  -6  16  -11.44    8.15
  -3   6 -17    0.51    9.99
   3  -6  17  -12.12    8.15
  -3   6 -18   13.28   14.94
   3  -6  18    2.90   13.06
   3  -5 -18    2.48   11.14
   3  -5 -17    7.98   11.48
  -3   5  16   -1.84   14.30
   3  -5 -16   -4.78    8.71
  -3   5  15   31.76   13.45
   3  -5 -15   58.53   20.36
   3  -5 -15   29.59   13.66
  -3   5  14   11.01    9.52
   3  -5 -14   19.13   10.37
   3  -5 -14   21.09   12.08
  -3   5  13    1.58    8.15
   3  -5 -13    5.55    8.11
   3  -5 -13    5.93    8.67
  -3   5  12   46.71   14.69
   3  -5 -12   56.65   14.09
   3  -5 -12   55.03   14.77
  -3   5  11    3.12    7.13
   3  -5 -11    4.14    6.15
   3  -5 -11    0.98    6.62
  -3   5  10    2.39    9.52
   3  -5 -10    0.00    5.93
   3  -5 -10   -2.77    5.21
  -3   5   9   26.00   11.44
   3  -5  -9   12.94    7.64
   3  -5  -9   16.52    8.71
  -3   5   8   62.37   14.22
   3  -5  -8   64.04   12.55
   3  -5  -8   58.74   13.11
  -3   5   7  598.71   32.70
   3  -5  -7  584.80   28.30
   3  -5  -7  565.41   30.44
  -3   5   6  289.03   22.63
   3  -5  -6  267.17   19.51
   3  -5  -6  260.38   21.05
  -3   5   5  246.97   20.45
   3  -5  -5  254.91   18.78
   3  -5  -5  238.14   19.47
  -3   5   4  148.78   16.61
   3  -5  -4  198.43   16.56
   3  -5  -4  157.02   16.22
  -3   5   3   32.10    9.95
   3  -5  -3   27.19    8.58
   3  -5  -3   22.63    8.11
  -3   5   2   17.89    7.68
   3  -5  -2    4.95    5.38
   3  -5  -2   11.70    7.09
  -3   5   1   93.54   14.64
   3  -5  -1  100.75   15.07
  -3   5   0   22.11    8.71
   3  -5   0   17.63    8.41
  -3   5  -1   23.78    8.50
   3  -5   1   26.55    8.75
  -3   5  -2  212.65   15.63
   3  -5   2  198.77   17.55
  -3   5  -3  204.37   14.98
   3  -5   3  182.38   17.63
  -3   5  -4  100.41   10.59
   3  -5   4   78.17   13.70
  -3   5  -5    6.92    4.87
  -3   5  -5    2.48    5.59
   3  -5   5    7.09    7.30
  -3   5  -6    4.74    4.35
  -3   5  -6    2.05    5.21
   3  -5   6    4.40    6.10
  -3   5  -7    2.77    3.29
  -3   5  -7    4.61    7.51
   3  -5   7    6.83    7.34
  -3   5  -8   93.67    8.88
  -3   5  -8   85.98   16.56
   3  -5   8   62.12   13.75
  -3   5  -9   14.47    9.22
   3  -5   9    5.21    7.47
  -3   5 -10  334.83   28.56
   3  -5  10  266.40   25.27
  -3   5 -11   28.05   12.64
   3  -5  11   27.54   13.23
  -3   5 -12  172.65   26.94
   3  -5  12  157.53   25.02
  -3   5 -13   23.01   12.68
   3  -5  13   38.34   15.11
  -3   5 -14    5.17   10.46
   3  -5  14   -9.99    8.24
  -3   5 -15   13.15   11.83
   3  -5  15    7.39   10.33
  -3   5 -16    1.88    9.82
   3  -5  16    0.73    9.90
  -3   5 -17    6.45   12.08
   3  -5  17    3.88   11.70
  -3   5 -18    2.26   12.94
   3  -5  18  -14.43   10.37
  -3   5 -19   10.25   14.17
   3  -5  19    2.05   14.56
   3  -4 -18    4.78   12.68
   3  -4 -17    0.60   10.25
   3  -4 -16   16.22   12.51
   3  -4 -16   14.39   11.87
  -3   4  15   44.87   14.43
   3  -4 -15   43.08   14.05
   3  -4 -15   36.12   14.60
  -3   4  14   19.64   10.42
   3  -4 -14   28.01   12.00
   3  -4 -14    7.77    9.18
  -3   4  13  100.84   19.34
   3  -4 -13  107.54   19.13
   3  -4 -13   87.52   18.10
  -3   4  12   27.24   11.44
   3  -4 -12   33.43   12.59
   3  -4 -12   38.08   12.85
  -3   4  11   56.10   14.60
   3  -4 -11   52.60   12.94
   3  -4 -11   47.22   12.89
  -3   4  10   40.73   12.51
   3  -4 -10   44.49   11.74
   3  -4 -10   32.92   10.84
  -3   4   9  284.59   22.97
   3  -4  -9  292.83   21.56
   3  -4  -9  306.79   23.22
  -3   4   8    4.99    6.40
   3  -4  -8    6.57    6.40
   3  -4  -8    2.52    5.89
  -3   4   7  651.23   32.23
   3  -4  -7  538.86   26.77
   3  -4  -7  618.91   29.84
  -3   4   6  599.91   29.76
   3  -4  -6  563.66   26.60
   3  -4  -6  541.81   27.02
  -3   4   5  235.70   18.87
   3  -4  -5  272.59   18.19
   3  -4  -5  262.60   18.96
  -3   4   4    0.21    5.55
   3  -4  -4    1.37    4.74
   3  -4  -4    2.22    4.40
  -3   4   3  156.55   15.24
   3  -4  -3  185.88   15.28
   3  -4  -3  159.50   14.90
  -3   4   2   -1.96    5.21
   3  -4  -2    2.22    4.91
   3  -4  -2   -0.77    4.99
  -3   4   1  203.77   17.93
   3  -4  -1  236.60   17.72
  -3   4   0   -5.46    7.30
   3  -4   0    6.10    6.06
  -3   4  -1  155.78   14.94
   3  -4   1  187.93   16.48
  -3   4  -2  222.81   15.11
   3  -4   2  220.93   17.25
  -3   4  -3   18.23    6.10
   3  -4   3   11.83    6.40
  -3   4  -4  642.69   22.63
   3  -4   4  647.04   29.24
  -3   4  -5   16.27    5.04
  -3   4  -5    1.88    5.17
   3  -4   5    9.48    7.04
  -3   4  -6    1.49    2.86
  -3   4  -6   -1.45    4.65
   3  -4   6   -3.42    4.48
  -3   4  -7    0.81    2.82
  -3   4  -7   -3.84    4.10
   3  -4   7   -6.23    4.53
  -3   4  -8   38.59    5.17
  -3   4  -8   27.49   10.25
   3  -4   8   27.75    9.86
  -3   4  -9   29.54   11.06
   3  -4   9   18.96    9.01
  -3   4 -10    5.93    7.60
   3  -4  10   -4.40    5.12
  -3   4 -11  166.76   25.15
   3  -4  11  124.96   20.41
  -3   4 -12  252.27   25.36
  -3   4 -12  224.05   25.79
   3  -4  12  198.43   24.51
  -3   4 -13   50.04   16.44
  -3   4 -13   41.67   15.58
   3  -4  13   49.78   15.67
  -3   4 -14  142.55   24.51
  -3   4 -14  190.96   28.90
   3  -4  14  164.24   26.04
  -3   4 -15   17.97   11.48
  -3   4 -15   16.22   12.98
   3  -4  15    6.79   11.36
  -3   4 -16    7.77   11.23
  -3   4 -16    3.33   11.74
   3  -4  16    5.25   11.57
  -3   4 -17   13.06   13.58
  -3   4 -17   -3.29   11.65
   3  -4  17    3.29   11.01
  -3   4 -18    1.62   11.61
  -3   4 -18    7.90   12.25
   3  -4  18   11.87   13.02
  -3   4 -19    6.75   12.30
   3  -4  19   -4.35   10.37
  -3   4 -20   17.67   15.54
   3  -4  20   13.45   15.11
   3  -3 -17    0.04    9.39
   3  -3 -17    8.97   10.80
   3  -3 -16   16.56   12.12
   3  -3 -16   11.70   11.31
   3  -3 -15   -1.88    7.51
   3  -3 -15   -4.57    7.68
  -3   3  14   81.46   17.20
   3  -3 -14   64.64   16.31
   3  -3 -14   59.90   15.80
  -3   3  13   14.86    9.56
   3  -3 -13    6.83    9.18
   3  -3 -13   21.30   10.37
  -3   3  12   -1.75    6.19
   3  -3 -12    5.51    6.87
   3  -3 -12   -1.62    6.66
  -3   3  11   -3.07    6.15
   3  -3 -11    7.94    7.34
   3  -3 -11    3.71    6.79
  -3   3  10  228.45   20.92
   3  -3 -10  222.38   20.15
   3  -3 -10  184.22   18.57
  -3   3   9    8.24    6.92
   3  -3  -9    2.90    6.36
   3  -3  -9    2.73    5.89
  -3   3   8  400.37   25.15
   3  -3  -8  402.89   23.95
   3  -3  -8  357.50   22.63
  -3   3   7  130.77   14.60
   3  -3  -7  140.03   14.77
   3  -3  -7  119.50   13.70
  -3   3   6 1184.07   39.40
   3  -3  -6 1262.66   38.17
   3  -3  -6 1106.88   35.48
  -3   3   5  161.67   16.14
   3  -3  -5  142.38   13.79
   3  -3  -5  125.69   13.06
  -3   3   4  121.89   13.41
   3  -3  -4  105.66   12.12
   3  -3  -4  116.04   12.08
  -3   3   3 1131.34   35.73
   3  -3  -3  872.41   29.16
   3  -3  -3 1049.59   31.59
  -3   3   2   12.94    6.15
   3  -3  -2   12.12    6.40
   3  -3  -2   13.58    5.81
  -3   3   1  108.31   11.40
   3  -3  -1  103.31   11.23
   3  -3  -1  106.35   11.57
  -3   3   0   48.88    9.18
   3  -3   0   37.10    7.90
  -3   3  -1  342.65   17.33
   3  -3   1  315.28   17.93
  -3   3  -2   39.66    7.77
   3  -3   2   32.15    8.07
  -3   3  -3   76.76    9.31
   3  -3   3   86.11   12.55
  -3   3  -4  739.60   22.07
   3  -3   4  734.39   28.95
  -3   3  -5    7.30    3.97
  -3   3  -5   14.81    6.79
   3  -3   5    5.25    5.64
  -3   3  -6  324.20   12.85
  -3   3  -6  340.55   21.64
   3  -3   6  327.66   21.56
  -3   3  -7  259.74   10.42
  -3   3  -7  288.43   21.22
   3  -3   7  219.44   18.87
  -3   3  -8  205.61    7.30
  -3   3  -8  206.42   18.74
  -3   3  -8  188.06   18.57
   3  -3   8  204.92    7.56
   3  -3   8  223.49   20.49
  -3   3  -9    2.18    6.83
  -3   3  -9   -1.79    5.72
   3  -3   9   10.97    7.64
  -3   3 -10   85.98   16.22
  -3   3 -10   68.52   15.16
   3  -3  10   82.01   15.88
  -3   3 -11  172.01   19.55
  -3   3 -11  198.56   22.46
   3  -3  11  194.16   21.77
  -3   3 -12   -2.99    6.53
  -3   3 -12   -1.79    8.15
   3  -3  12    5.04    8.84
  -3   3 -13  533.99   35.09
  -3   3 -13  656.73   40.47
   3  -3  13  572.93   37.87
  -3   3 -14   12.12   10.59
  -3   3 -14   26.98   13.70
   3  -3  14   10.25   10.97
  -3   3 -15   31.63   12.98
  -3   3 -15   42.05   15.97
   3  -3  15   24.89   14.17
  -3   3 -16   -8.75    8.07
  -3   3 -16    1.79    9.69
   3  -3  16    8.50   10.37
  -3   3 -17    2.99   10.54
  -3   3 -17    2.77   10.16
   3  -3  17    1.66    9.73
  -3   3 -18    3.71   11.65
  -3   3 -18    1.54   10.29
   3  -3  18    5.46   10.08
  -3   3 -19    1.11   11.01
  -3   3 -19   -5.64   11.36
   3  -3  19    0.43   10.84
  -3   3 -20    0.68   12.64
  -3   3 -20   -5.38   12.25
   3  -3  20    0.60   13.06
  -3   3 -21   10.33   16.74
   3  -2 -18    3.16   11.65
   3  -2 -17   -3.03   10.25
   3  -2 -16   -4.53    8.45
   3  -2 -16   -3.59    8.54
   3  -2 -15   12.94   11.40
   3  -2 -15    3.71    8.97
  -3   2  14    2.73    7.56
   3  -2 -14    8.03    9.26
   3  -2 -14    5.21    8.79
  -3   2  13   -1.11    5.93
   3  -2 -13    2.09    8.20
   3  -2 -13   -4.44    6.45
  -3   2  12   77.87   15.20
   3  -2 -12   81.71   16.65
   3  -2 -12   85.34   16.01
  -3   2  11  291.07   22.37
   3  -2 -11  257.99   22.71
   3  -2 -11  275.96   22.11
  -3   2  10   47.69   11.57
   3  -2 -10   34.45   10.76
   3  -2 -10   38.04   10.72
  -3   2   9  263.37   20.15
   3  -2  -9  245.31   20.28
   3  -2  -9  204.75   17.50
  -3   2   8  104.55   15.33
   3  -2  -8  113.05   16.09
   3  -2  -8  113.43   12.98
  -3   2   7  127.27   13.62
   3  -2  -7  117.40   13.75
   3  -2  -7  131.75   13.15
  -3   2   6  552.91   26.13
   3  -2  -6  685.76   27.88
   3  -2  -6  565.29   23.91
  -3   2   5    6.23    5.51
   3  -2  -5   -1.11    3.93
   3  -2  -5    3.63    4.53
  -3   2   4 1855.36   43.84
   3  -2  -4 1749.69   40.73
   3  -2  -4 1690.39   36.93
  -3   2   3  116.21   11.83
   3  -2  -3  117.53   11.53
   3  -2  -3  101.31   10.12
  -3   2   2  869.85   28.13
   3  -2  -2  804.53   26.34
   3  -2  -2  780.84   23.95
  -3   2   1  221.91   14.77
   3  -2  -1  198.30   14.17
   3  -2  -1  229.90   13.75
  -3   2   0   60.03    9.09
   3  -2   0   58.45    9.05
  -3   2  -1    7.00    4.82
   3  -2   1    8.54    4.61
  -3   2  -2  487.76   18.31
   3  -2   2  467.69   20.02
  -3   2  -3  449.51   16.86
   3  -2   3  453.99   20.49
  -3   2  -4   94.73    8.28
   3  -2   4   93.67   11.06
  -3   2  -5  441.09   14.73
  -3   2  -5  458.51   22.58
  -3   2  -5  475.33   23.18
   3  -2   5  463.42   22.88
  -3   2  -6  560.46   15.11
  -3   2  -6  638.29   27.37
  -3   2  -6  573.01   26.55
   3  -2   6  562.51   26.26
  -3   2  -7  228.70    8.71
  -3   2  -7  233.57   18.10
  -3   2  -7  218.71   18.49
   3  -2   7  244.50   19.34
  -3   2  -8   19.68    8.67
  -3   2  -8   24.42    9.22
   3  -2   8   24.97    2.86
   3  -2   8   15.41    7.98
  -3   2  -9   -4.18    5.21
  -3   2  -9    4.65    6.53
   3  -2   9   -1.02    5.42
  -3   2 -10  305.08   22.75
  -3   2 -10  320.53   24.55
   3  -2  10  277.16   22.84
  -3   2 -11   10.93    7.43
  -3   2 -11   22.71   10.67
   3  -2  11   13.15    9.48
  -3   2 -12  332.70   26.26
  -3   2 -12  330.39   28.09
   3  -2  12  254.70   24.08
  -3   2 -13   35.09   11.78
  -3   2 -13   51.36   15.11
   3  -2  13   46.83   14.98
  -3   2 -14   95.84   19.68
  -3   2 -14   94.56   20.15
   3  -2  14   55.24   15.33
  -3   2 -15   82.01   18.53
  -3   2 -15  105.58   22.20
   3  -2  15   69.46   18.27
  -3   2 -16    5.55    9.82
  -3   2 -16    4.70   11.40
   3  -2  16   -3.03    8.84
  -3   2 -17   30.06   14.22
  -3   2 -17   11.70   13.11
   3  -2  17   26.17   14.86
  -3   2 -18    5.59   10.42
  -3   2 -18    3.88   11.83
   3  -2  18    0.04   11.19
  -3   2 -19    0.98   11.36
  -3   2 -19    2.65   12.64
   3  -2  19   -0.17   11.78
  -3   2 -20   -4.48    9.05
  -3   2 -20    1.37   13.36
   3  -2  20   -1.58   11.27
  -3   2 -21    4.99   11.78
  -3   2 -21    3.93   23.31
   3  -2  21    4.87   15.28
   3  -1 -19    4.74   13.11
   3  -1 -18    1.02   11.91
   3  -1 -17   -3.24    9.22
   3  -1 -16    6.36   10.80
   3  -1 -16    6.49    8.71
   3  -1 -15    0.81    8.84
   3  -1 -15    9.26    9.05
   3  -1 -14    7.98    9.52
   3  -1 -14    3.20    7.60
  -3   1  13    9.43    7.68
   3  -1 -13    4.78    8.50
   3  -1 -13    2.01    6.32
  -3   1  12  172.43   17.55
   3  -1 -12  170.55   20.66
   3  -1 -12  163.94   18.31
  -3   1  11   59.90   12.64
   3  -1 -11   55.07   13.75
   3  -1 -11   70.57   13.92
  -3   1  10  406.30   23.99
   3  -1 -10  379.11   25.83
   3  -1 -10  387.09   23.65
  -3   1   9   49.35   11.14
   3  -1  -9   61.09   13.28
   3  -1  -9   58.96   11.10
  -3   1   8   18.66    7.43
   3  -1  -8   14.26    7.26
   3  -1  -8   21.73    6.87
  -3   1   7  328.26   19.89
   3  -1  -7  334.54   21.18
   3  -1  -7  323.90   18.10
  -3   1   6    1.02    3.88
   3  -1  -6    2.65    4.78
   3  -1  -6    2.86    4.06
  -3   1   5  560.29   24.29
   3  -1  -5  629.92   25.83
   3  -1  -5  601.70   21.52
  -3   1   4  441.78   20.66
   3  -1  -4  482.29   21.52
   3  -1  -4  425.81   17.20
  -3   1   3 2064.67   42.01
   3  -1  -3 1942.45   40.39
   3  -1  -3 1925.88   33.64
  -3   1   2  302.94   16.22
   3  -1  -2  316.82   16.86
   3  -1  -2  302.52   13.49
  -3   1   1   10.59    5.08
   3  -1  -1    7.17    4.65
   3  -1  -1    8.88    4.23
  -3   1   0  379.45   16.65
   3  -1   0  257.01   14.34
   3  -1   0  354.17   14.52
  -3   1  -1   68.35    8.28
   3  -1   1   53.19    7.51
  -3   1  -2 1266.46   27.07
   3  -1   2 1205.24   28.30
  -3   1  -3    3.12    3.37
   3  -1   3   -0.30    3.63
  -3   1  -4  117.06    8.41
  -3   1  -4  110.79   11.06
   3  -1   4  117.28   11.19
  -3   1  -5   57.04    6.06
  -3   1  -5   46.66    8.71
  -3   1  -5   71.00   11.40
   3  -1   5   63.23   10.84
  -3   1  -6   40.69    5.34
  -3   1  -6   40.56    9.22
  -3   1  -6   42.99    9.52
   3  -1   6   34.79    8.88
  -3   1  -7  964.54   32.19
  -3   1  -7  944.01   33.81
   3  -1   7  975.00   16.91
   3  -1   7 1001.26   19.55
  -3   1  -8  357.89   21.39
  -3   1  -8  357.59   22.93
   3  -1   8  408.56    9.22
   3  -1   8  348.37    8.54
  -3   1  -9 1032.42   36.72
  -3   1  -9 1017.44   39.06
  -3   1 -10   39.11   10.37
  -3   1 -10   28.65   10.29
  -3   1 -11  518.15   28.73
  -3   1 -11  508.33   30.70
  -3   1 -12    3.29    6.87
  -3   1 -12    4.18    8.07
  -3   1 -13  368.43   26.77
  -3   1 -13  360.83   28.95
  -3   1 -14  100.63   18.49
  -3   1 -14   82.01   18.31
  -3   1 -15   75.52   17.59
  -3   1 -15   92.73   19.94
  -3   1 -16   34.37   13.49
  -3   1 -16   39.83   16.14
  -3   1 -17   11.78   10.76
  -3   1 -17   36.20   15.37
  -3   1 -18    2.09    9.22
  -3   1 -18   10.84   12.00
  -3   1 -19    1.79    9.65
  -3   1 -19    0.34   12.30
   3  -1  19    3.42   12.51
  -3   1 -20    1.15   11.57
  -3   1 -20   -4.44   12.30
   3  -1  20  -16.35   10.42
  -3   1 -21   -6.23   10.93
   3  -1  21    3.33   11.87
   3   0 -20   10.67   14.64
   3   0 -19   -3.63   12.08
   3   0 -18   17.20   14.69
   3   0 -17   -1.28   10.37
   3   0 -16    8.79   11.70
   3   0 -15   10.97   11.01
   3   0 -15   -1.71    7.34
   3   0 -14    2.09    7.56
   3   0 -14   -0.09    7.17
   3   0 -13   36.59   14.64
   3   0 -13   30.10   11.14
  -3   0  12   34.84    9.78
   3   0 -12   37.40   13.15
   3   0 -12   33.13   10.46
  -3   0  11  414.54   23.74
   3   0 -11  442.85   29.59
   3   0 -11  423.93   25.44
  -3   0  10  147.12   15.24
   3   0 -10  156.89   21.39
   3   0 -10  123.21   14.56
  -3   0   9   21.26    7.64
   3   0  -9   39.40   11.70
   3   0  -9   26.21    7.86
  -3   0   8  596.20   25.96
   3   0  -8  557.99   28.26
   3   0  -8  545.90   23.44
  -3   0   7  343.54   19.42
   3   0  -7  347.68   22.03
   3   0  -7  333.34   17.55
  -3   0   6  156.42   13.53
   3   0  -6  166.24   15.28
   3   0  -6  168.51   12.04
  -3   0   5  239.84   15.67
   3   0  -5  207.27   15.84
   3   0  -5  218.28   12.30
  -3   0   4  721.41   24.80
   3   0  -4  626.72   24.29
   3   0  -4  705.27   19.38
  -3   0   3  659.29   22.97
   3   0  -3  700.02   24.51
   3   0  -3  664.16   17.29
  -3   0   2   15.20    5.68
   3   0  -2   13.36    5.55
   3   0  -2   14.98    3.84
  -3   0   1  463.93   18.14
   3   0  -1  517.94   19.13
   3   0  -1  469.14   13.19
  -3   0   0  472.99   17.63
   3   0   0  420.52   17.03
   3   0   0  439.22   13.15
  -3   0  -1  364.76   15.24
   3   0   1  358.78   15.24
   3   0   1  338.98   12.55
  -3   0  -2 1214.46   25.40
  -3   0  -2 1260.48   25.91
   3   0   2 1118.83   24.12
  -3   0  -3  397.72   14.47
  -3   0  -3  416.67   16.91
   3   0   3  376.76   16.01
  -3   0  -4   45.42    6.32
  -3   0  -4   56.35    8.84
  -3   0  -5    8.88    3.50
  -3   0  -5    1.71    3.63
  -3   0  -5   -2.69    3.71
   3   0   5    4.44    3.24
  -3   0  -6  767.48   25.36
  -3   0  -6  827.16   28.99
   3   0   6  774.65   17.50
  -3   0  -7  216.41   14.98
  -3   0  -7  223.75   17.20
   3   0   7  213.80    9.22
  -3   0  -8  855.85   29.54
  -3   0  -8  891.41   33.81
   3   0   8  818.15   16.31
  -3   0  -9  220.25   16.74
  -3   0  -9  220.33   19.00
   3   0   9  205.86    7.94
   3   0   9  217.86    9.61
  -3   0 -10  396.65   23.05
  -3   0 -10  387.05   25.27
   3   0  10  393.36    9.48
   3   0  10  385.47    9.48
  -3   0 -11   41.62   10.89
  -3   0 -11   26.98   10.76
  -3   0 -12   35.73   10.42
  -3   0 -12   48.80   14.43
  -3   0 -13   39.19   12.00
  -3   0 -13   11.40    9.52
  -3   0 -14    5.55    7.26
  -3   0 -14   -3.54    6.79
  -3   0 -15  136.27   21.60
  -3   0 -15  131.71   23.27
  -3   0 -16   99.77   19.51
  -3   0 -16  119.41   22.75
  -3   0 -17   13.70   10.80
  -3   0 -17    6.02   11.23
  -3   0 -18   -0.85    8.67
  -3   0 -18   -0.13   10.72
  -3   0 -19   -4.18    9.43
  -3   0 -19   -3.03   11.91
  -3   0 -20   -3.63   12.42
  -3   0 -21    1.28   13.02
   3   1 -20   12.81   14.56
   3   1 -19   -2.26   12.72
   3   1 -18   -1.62   12.72
   3   1 -17    9.82   13.06
   3   1 -16   -4.82    9.61
   3   1 -15   15.75   10.67
   3   1 -14   -3.88    7.68
   3   1 -14   -5.34    6.45
   3   1 -13    6.19    9.73
   3   1 -13    8.28    7.43
  -3  -1  12   29.84    8.92
   3   1 -12   51.23   15.20
   3   1 -12   43.42   11.48
  -3  -1  11   72.32   12.00
   3   1 -11   42.48   12.72
   3   1 -11   61.22   12.30
  -3  -1  10    1.37    5.25
   3   1 -10    3.97    7.51
   3   1 -10    0.43    4.78
  -3  -1   9  333.64   19.38
   3   1  -9  344.01   24.93
   3   1  -9  377.23   20.92
  -3  -1   8  148.01   13.49
   3   1  -8  135.42   15.50
   3   1  -8  146.78   12.81
  -3  -1   7  828.27   28.13
   3   1  -7  850.51   33.51
   3   1  -7  874.50   26.34
  -3  -1   6   -1.28    3.50
   3   1  -6    4.57    5.85
   3   1  -6   -2.22    2.90
  -3  -1   5  211.24   14.13
   3   1  -5  227.80   16.44
   3   1  -5  259.78   12.38
  -3  -1   4   32.62    7.51
   3   1  -4   33.34    8.07
   3   1  -4   32.40    5.29
  -3  -1   3  185.84   12.76
   3   1  -3  200.65   13.83
   3   1  -3  157.79    7.56
  -3  -1   2 2897.08   44.27
  -3  -1   2 2736.86   23.95
   3   1  -2 2838.47   45.98
   3   1  -2 2965.01   25.27
  -3  -1   1 1453.11   30.48
  -3  -1   1 1450.29   16.05
   3   1  -1 1479.24   30.78
   3   1  -1 1326.49   15.50
  -3  -1   0 5547.37   57.08
  -3  -1   0 4632.90   31.51
   3   1   0 5628.91   56.14
   3   1   0 5208.44   33.60
   3   1   0 5613.16   35.18
  -3  -1  -1 3448.97   43.76
  -3  -1  -1 3546.56   33.21
   3   1   1 3498.49   42.22
   3   1   1 3471.46   32.53
  -3  -1  -2   64.55    7.77
  -3  -1  -2   63.95    6.53
   3   1   2   58.40    7.51
  -3  -1  -3  759.15   19.94
  -3  -1  -3  775.54   20.62
  -3  -1  -4 1519.88   27.24
  -3  -1  -4 1520.09   31.85
   3   1   4 1543.53   27.41
  -3  -1  -5    4.95    4.61
   3   1   5    9.09    3.80
  -3  -1  -6    6.96    4.18
  -3  -1  -6    7.34    5.08
   3   1   6    9.48    3.84
  -3  -1  -7  458.94   19.04
  -3  -1  -7  450.15   22.46
   3   1   7  486.05   15.33
  -3  -1  -8  267.34   15.84
  -3  -1  -8  264.78   19.13
   3   1   8  246.29   11.19
  -3  -1  -9  333.72   18.78
  -3  -1  -9  343.33   22.29
   3   1   9  321.56   12.55
  -3  -1 -10  479.94   23.48
  -3  -1 -10  453.73   26.77
   3   1  10  468.89   14.86
  -3  -1 -11    2.60    5.04
  -3  -1 -11   -3.46    5.04
   3   1  11    0.94    2.56
  -3  -1 -12  498.86   26.38
  -3  -1 -12  557.13   32.62
  -3  -1 -13   15.84    8.03
  -3  -1 -13   19.51   10.67
  -3  -1 -14   56.74   12.98
  -3  -1 -14   81.20   17.76
  -3  -1 -15   24.25   10.20
  -3  -1 -15   18.23   10.93
  -3  -1 -16    0.09    6.66
  -3  -1 -16    8.62    9.78
  -3  -1 -17    4.35    7.94
  -3  -1 -17    3.50   10.67
  -3  -1 -18   24.08   12.00
  -3  -1 -18   52.17   18.78
  -3  -1 -19   -5.46    8.88
  -3  -1 -20    7.77   13.32
  -3  -1 -21   -3.84   12.85
   3   2 -19   11.57   12.89
   3   2 -18   -0.60   11.95
   3   2 -17   12.68   14.73
   3   2 -16    2.86   10.33
   3   2 -15   19.55   12.68
   3   2 -14   -0.38    8.84
   3   2 -14    1.49    7.81
   3   2 -13   10.33   10.12
   3   2 -13    4.82    7.47
   3   2 -12    2.01    8.67
   3   2 -12    0.47    5.76
  -3  -2  11   22.97    8.03
   3   2 -11   15.97    9.90
   3   2 -11   25.83    8.71
  -3  -2  10  485.45   23.01
   3   2 -10  552.39   32.53
   3   2 -10  510.17   25.19
  -3  -2   9  176.32   14.30
   3   2  -9  191.77   19.47
   3   2  -9  175.93   14.77
  -3  -2   8  317.46   17.80
   3   2  -8  356.05   24.55
   3   2  -8  385.98   19.17
  -3  -2   7  872.84   27.96
   3   2  -7  915.23   35.69
   3   2  -7  923.17   26.60
  -3  -2   6   30.44    7.26
   3   2  -6   38.42    9.90
   3   2  -6   33.21    6.23
  -3  -2   5  327.32   16.74
   3   2  -5  349.09   20.53
   3   2  -5  329.11   13.15
  -3  -2   4   91.28    9.22
   3   2  -4   89.01   12.59
   3   2  -4   92.21    6.62
  -3  -2   3  413.00   17.80
  -3  -2   3  402.07    9.78
   3   2  -3  416.93   19.47
   3   2  -3  391.53    9.73
  -3  -2   2  120.14   10.46
   3   2  -2  136.96   11.65
   3   2  -2  121.72    3.54
  -3  -2   1 1114.60   26.94
  -3  -2   0  928.68   24.12
  -3  -2   0  963.99   10.54
   3   2   0  983.20   23.48
   3   2   0  866.86    9.86
  -3  -2  -1  977.95   24.29
  -3  -2  -1  961.98   15.50
   3   2   1 1019.06   24.80
   3   2   1  944.09   21.13
   3   2   1  944.14   15.24
  -3  -2  -2  497.70   17.42
  -3  -2  -2  520.29   14.34
   3   2   2  485.96   17.16
   3   2   2  484.17   14.34
  -3  -2  -3 1389.93   28.30
  -3  -2  -3 1505.62   27.54
   3   2   3 1511.60   29.33
   3   2   3 1464.42   23.65
  -3  -2  -4  115.06    9.95
   3   2   4  125.22    9.26
  -3  -2  -5   21.22    6.19
   3   2   5   22.75    5.38
  -3  -2  -6 1844.94   30.70
  -3  -2  -6 1860.48   40.73
   3   2   6 1912.05   33.09
  -3  -2  -7   44.91    7.30
  -3  -2  -7   53.28   10.54
   3   2   7   40.51    6.79
  -3  -2  -8  372.36   16.74
  -3  -2  -8  370.27   21.56
   3   2   8  380.73   15.67
  -3  -2  -9  558.41   21.73
  -3  -2  -9  565.46   27.84
   3   2   9  581.00   19.38
  -3  -2 -10  823.96   27.96
  -3  -2 -10  796.29   34.92
   3   2  10  766.75   22.24
  -3  -2 -11   63.70   10.89
  -3  -2 -11   68.22   13.66
   3   2  11   61.48    8.50
  -3  -2 -12  238.86   17.89
  -3  -2 -12  256.32   23.40
   3   2  12  224.39   13.06
  -3  -2 -13  124.15   14.26
  -3  -2 -13  172.01   20.28
  -3  -2 -14   44.66   11.27
  -3  -2 -14   43.03   13.92
  -3  -2 -15   67.33   14.43
  -3  -2 -15  114.93   22.16
  -3  -2 -16   15.97    8.97
  -3  -2 -16   27.45   13.49
  -3  -2 -17   -3.12    6.70
  -3  -2 -17    9.61   11.70
  -3  -2 -18   -6.02    9.39
  -3  -2 -19   11.57   13.49
  -3  -2 -20   20.83   16.05
  -3  -2 -21   -3.67   12.72
   3   3 -19   -4.74   12.68
   3   3 -18   16.31   14.43
   3   3 -17   11.36   14.05
   3   3 -16   22.37   14.52
   3   3 -15   15.37   13.28
   3   3 -14    1.28    8.92
   3   3 -13   40.64   14.64
   3   3 -13   34.41   11.36
   3   3 -12   43.25   15.45
   3   3 -12   49.22   11.70
   3   3 -11   -5.04    7.26
   3   3 -11   -0.38    4.65
  -3  -3  10   10.16    5.72
   3   3 -10    5.12    9.31
   3   3 -10    3.50    5.81
  -3  -3   9   81.24   11.48
   3   3  -9  129.83   20.49
   3   3  -9   89.31   12.59
  -3  -3   8  916.90   29.03
   3   3  -8 1008.22   40.39
   3   3  -8  976.07   29.80
  -3  -3   7    0.85    4.23
   3   3  -7   11.91    7.60
   3   3  -7    8.97    4.74
  -3  -3   6  458.09   19.85
   3   3  -6  442.16   25.23
   3   3  -6  450.06   17.16
  -3  -3   5   23.40    6.49
  -3  -3   5   23.14    5.12
   3   3  -5   34.50    9.65
   3   3  -5   24.08    5.12
  -3  -3   4   71.00    9.65
  -3  -3   4   60.84    6.06
   3   3  -4   67.07   11.10
   3   3  -4   67.80    6.10
  -3  -3   3   19.98    5.85
  -3  -3   3   18.70    3.42
  -3  -3   3   18.57    3.33
   3   3  -3   27.02    7.68
  -3  -3   2    1.02    4.14
  -3  -3   2    5.29    1.88
  -3  -3   2    2.52    1.66
   3   3  -2    1.15    3.71
   3   3  -2    3.71    4.91
  -3  -3   1    7.81    4.61
  -3  -3   1    5.81    1.62
   3   3  -1    6.75    4.57
   3   3  -1    3.63    4.57
   3   3  -1    2.43    1.58
  -3  -3   0  458.04   18.06
  -3  -3   0  423.12    8.79
   3   3   0  452.11   17.97
   3   3   0  487.50   17.08
   3   3   0  451.81    9.05
  -3  -3  -1 4507.86   35.22
   3   3   1 4302.17   53.11
   3   3   1 4598.96   45.68
   3   3   1 4139.77   33.56
  -3  -3  -2  620.36   15.97
   3   3   2  589.49   20.15
   3   3   2  567.16   14.69
  -3  -3  -3    0.73    3.12
   3   3   3    5.29    4.10
   3   3   3    1.15    2.39
  -3  -3  -4  240.27   13.11
   3   3   4  255.47   13.62
   3   3   4  259.82    8.88
  -3  -3  -5  228.66   14.39
   3   3   5  217.05   12.72
  -3  -3  -6  101.91   11.06
   3   3   6   95.33    9.35
  -3  -3  -7  268.11   11.40
  -3  -3  -7  269.39   18.06
   3   3   7  281.30   14.98
  -3  -3  -8   55.37    7.43
  -3  -3  -8   49.31   10.93
   3   3   8   64.12    9.39
  -3  -3  -9  432.64   17.29
  -3  -3  -9  437.30   24.76
   3   3   9  467.31   19.68
  -3  -3 -10   96.06    9.99
  -3  -3 -10   86.79   15.16
   3   3  10   89.65    9.61
  -3  -3 -11  591.63   23.44
  -3  -3 -11  650.07   33.13
   3   3  11  544.32   21.90
  -3  -3 -12   49.52   10.03
  -3  -3 -12   58.79   14.26
   3   3  12   52.13    9.48
  -3  -3 -13   88.16   13.53
  -3  -3 -13   72.66   16.09
   3   3  13   81.93   11.53
  -3  -3 -14   10.89    6.40
  -3  -3 -14   14.26    9.48
  -3  -3 -15   49.10   11.95
  -3  -3 -15   50.55   16.48
  -3  -3 -16   10.12    7.81
  -3  -3 -16   12.00   10.08
  -3  -3 -17    8.45   10.08
  -3  -3 -18   26.55   15.24
  -3  -3 -19   -4.65   10.37
  -3  -3 -20   -3.07   12.08
  -3  -3 -21    4.61   12.94
   3   4 -18   -8.50   11.57
   3   4 -17   -2.95   10.84
   3   4 -16    8.67   11.10
   3   4 -15    0.26   10.54
   3   4 -14   41.11   16.09
  -3  -4  13    1.41    7.68
   3   4 -13    7.68   10.84
  -3  -4  12   41.28   11.48
   3   4 -12   31.89   13.23
   3   4 -12   32.92   10.46
  -3  -4  11   28.01    9.65
   3   4 -11   33.64   13.79
   3   4 -11   16.86    8.20
  -3  -4  10    8.79    6.96
  -3  -4  10   11.27    6.53
   3   4 -10    8.37    5.68
   3   4 -10   11.53    8.41
   3   4 -10   10.25    6.70
  -3  -4   9   32.70    8.24
  -3  -4   9   34.20    8.84
   3   4  -9   30.57    7.56
   3   4  -9   29.24   11.65
   3   4  -9   29.71    8.20
  -3  -4   8   10.59    5.85
  -3  -4   8    8.97    5.29
   3   4  -8    2.56    4.57
   3   4  -8   13.87    8.24
   3   4  -8    6.92    5.29
  -3  -4   7  918.95   28.56
  -3  -4   7 1031.44   29.41
   3   4  -7  895.77   28.22
   3   4  -7  999.29   39.53
   3   4  -7 1111.28   30.18
  -3  -4   6  964.03   28.77
  -3  -4   6  864.17   24.93
   3   4  -6 1053.47   30.10
   3   4  -6 1053.60   38.85
   3   4  -6 1131.21   28.01
  -3  -4   5  144.43   12.25
  -3  -4   5  152.37   10.46
   3   4  -5  181.27   13.19
   3   4  -5  165.69   15.88
  -3  -4   4 1052.45   29.20
  -3  -4   4 1011.42   22.11
   3   4  -4 1095.82   29.88
   3   4  -4  968.64   33.39
  -3  -4   3  347.90   17.25
  -3  -4   3  351.31   12.08
   3   4  -3  367.41   17.72
   3   4  -3  327.32   18.66
  -3  -4   2  551.03   13.49
   3   4  -2  540.35   21.00
   3   4  -2  533.39   21.86
  -3  -4   1  188.74    8.11
   3   4  -1  161.46   12.47
   3   4  -1  188.66   12.98
  -3  -4   0  693.15   15.16
   3   4   0  749.03   24.16
   3   4   0  777.85   22.20
  -3  -4  -1 1121.01   21.05
   3   4   1 1230.17   24.76
  -3  -4  -2    3.59    3.24
   3   4   2    1.24    4.31
   3   4   2    3.50    2.82
  -3  -4  -3  750.48   16.74
  -3  -4  -3  835.70   22.37
   3   4   3  918.39   27.02
   3   4   3  834.97   15.24
  -3  -4  -4   -1.32    3.50
   3   4   4    0.26    3.63
   3   4   4    3.67    1.92
  -3  -4  -5 1640.02   36.84
   3   4   5 1610.47   36.37
   3   4   5 1405.81   13.66
   3   4   5 1585.29   14.90
  -3  -4  -6   57.93   10.46
   3   4   6   61.86    9.86
   3   4   6   62.29    3.88
  -3  -4  -7  175.72   15.37
   3   4   7  185.80   13.83
   3   4   7  178.58    7.51
  -3  -4  -8  153.86    8.11
  -3  -4  -8  149.46   15.33
   3   4   8  161.16   13.19
  -3  -4  -9   73.90    7.00
  -3  -4  -9   78.34   13.75
   3   4   9   83.25   10.29
  -3  -4 -10  883.90   23.44
  -3  -4 -10  906.57   37.27
   3   4  10  885.60   29.84
  -3  -4 -11   16.18    5.59
  -3  -4 -11   20.96    9.65
   3   4  11    7.21    5.42
  -3  -4 -12  158.86   12.68
  -3  -4 -12  144.68   20.62
   3   4  12  171.02   14.77
  -3  -4 -13   97.64   11.44
  -3  -4 -13  109.42   19.17
   3   4  13   94.14   13.53
  -3  -4 -14    5.98    5.55
  -3  -4 -14    5.55    7.94
   3   4  14   -1.45    5.08
  -3  -4 -15   70.02   17.55
  -3  -4 -16   43.80   15.97
  -3  -4 -17    2.22   10.29
  -3  -4 -18   -7.56   10.42
  -3  -4 -19    9.18   12.08
  -3  -4 -20   20.62   14.60
  -3  -4 -21   26.55   16.86
   3   5 -18   -9.73   10.80
   3   5 -17    4.10   12.21
   3   5 -16    0.04   11.27
   3   5 -15   55.80   19.68
   3   5 -14   22.97   13.32
   3   5 -13   47.82   16.31
  -3  -5  12   40.30   11.74
   3   5 -12   42.18   15.33
  -3  -5  11    3.80    6.79
   3   5 -11   14.64   11.06
   3   5 -11   17.55    8.28
  -3  -5  10    3.20    5.98
   3   5 -10    6.79    9.35
   3   5 -10    6.79    6.49
  -3  -5   9   60.07   11.57
   3   5  -9   57.81   10.12
   3   5  -9   58.66   14.94
  -3  -5   8  267.85   17.72
   3   5  -8  324.20   18.19
   3   5  -8  280.57   23.74
  -3  -5   7  494.12   21.77
   3   5  -7  436.23   20.58
   3   5  -7  460.86   29.03
  -3  -5   6   33.90    7.51
   3   5  -6   53.32    9.65
   3   5  -6   39.15   10.97
  -3  -5   5  152.20   11.27
   3   5  -5  135.68   12.51
   3   5  -5  163.21   16.78
  -3  -5   4   52.77    7.64
   3   5  -4   55.80    9.69
   3   5  -4   62.33   11.83
  -3  -5   3    3.16    3.54
   3   5  -3   -0.30    4.06
   3   5  -3    0.90    4.82
   3   5  -2    6.75    5.12
   3   5  -2    0.98    4.01
  -3  -5   1   51.23    6.83
   3   5  -1   54.35    9.22
   3   5  -1   71.08   10.54
  -3  -5   0    2.13    3.12
   3   5   0   -1.58    3.71
   3   5   0    2.39    3.93
  -3  -5  -1  718.04   19.89
   3   5   1  907.51   28.52
   3   5   1  816.83   21.73
  -3  -5  -2    6.87    3.93
   3   5   2    8.88    5.64
   3   5   2   15.28    4.14
  -3  -5  -3  793.43   23.78
   3   5   3  808.84   27.75
   3   5   3  987.94   17.67
  -3  -5  -4  440.20    8.62
  -3  -5  -4  454.41   19.47
   3   5   4  454.80   21.56
   3   5   4  518.32    9.69
  -3  -5  -5  820.50   27.71
   3   5   5  800.60   28.13
  -3  -5  -6   -3.80    3.16
   3   5   6    6.15    5.21
  -3  -5  -7  382.44   21.64
   3   5   7  446.09   22.07
  -3  -5  -8   32.32    9.01
   3   5   8   21.39    7.17
   3   5   8   29.46    2.95
  -3  -5  -9  302.22    9.90
  -3  -5  -9  331.03   22.97
   3   5   9  325.53   19.55
  -3  -5 -10   45.04    6.10
  -3  -5 -10   59.38   13.02
   3   5  10   40.81    9.78
  -3  -5 -11  282.02   13.19
  -3  -5 -11  321.22   24.97
   3   5  11  276.13   19.25
  -3  -5 -12   90.51    9.22
  -3  -5 -12   77.14   16.22
   3   5  12   93.32   14.64
  -3  -5 -13   14.17    5.64
  -3  -5 -13   22.71   10.80
   3   5  13   13.87    7.47
  -3  -5 -14  157.06   25.06
   3   5  14  148.61   16.05
  -3  -5 -15    7.81    9.48
  -3  -5 -16   42.27   15.67
  -3  -5 -17   -1.84   10.46
  -3  -5 -18   12.21   13.53
  -3  -5 -19   12.30   14.26
  -3  -5 -20   29.71   18.10
  -3  -5 -21   15.41   16.31
   3   6 -17   -0.43   11.06
   3   6 -16   -8.67    8.67
   3   6 -15    1.45   10.16
   3   6 -14   20.28   14.05
   3   6 -13   54.65   18.87
   3   6 -12   -4.65    7.86
  -3  -6  11   18.83    8.67
   3   6 -11   16.61   12.81
  -3  -6  10  163.13   16.99
   3   6 -10  146.65   23.86
  -3  -6   9   70.78   12.55
   3   6  -9   93.11   11.31
   3   6  -9  128.63   22.75
  -3  -6   8   48.11   10.20
   3   6  -8   60.11   10.37
   3   6  -8   65.75   16.61
  -3  -6   7    1.41    4.91
   3   6  -7   -0.98    4.18
   3   6  -7    4.27    7.47
  -3  -6   6   55.63    9.73
   3   6  -6   69.42   11.10
   3   6  -6   68.22   14.77
  -3  -6   5  151.39   12.47
   3   6  -5  205.52   15.28
   3   6  -5  162.61   16.91
  -3  -6   4  137.21   11.48
   3   6  -4  118.17   12.17
   3   6  -4  156.30   15.75
  -3  -6   3 1335.11   30.65
   3   6  -3 1076.40   32.66
   3   6  -3 1394.37   40.86
  -3  -6   2   -0.90    3.42
   3   6  -2    0.47    4.53
   3   6  -2    0.64    4.35
  -3  -6   1   33.77    6.75
   3   6  -1   39.96    9.26
   3   6  -1   38.08    8.88
  -3  -6   0   65.02   10.29
   3   6   0   87.26   10.89
   3   6   0   82.99    9.69
  -3  -6  -1  302.39   16.74
   3   6   1  310.71   18.53
   3   6   1  310.46   15.07
  -3  -6  -2   77.14   10.63
   3   6   2  106.82   14.30
   3   6   2   97.04    8.37
  -3  -6  -3  423.85   19.81
   3   6   3  485.88   23.61
   3   6   3  470.72   14.05
  -3  -6  -4  576.64   11.95
  -3  -6  -4  584.92   23.99
   3   6   4  675.22   27.58
   3   6   4  657.12   12.98
  -3  -6  -5  107.37   12.12
   3   6   5  132.94   14.09
  -3  -6  -6  507.27   24.72
   3   6   6  497.53   24.89
  -3  -6  -7   11.61    7.13
   3   6   7   13.41    6.83
  -3  -6  -8  518.15   27.24
   3   6   8  482.29   25.32
  -3  -6  -9   32.96   10.42
   3   6   9   34.50    9.26
  -3  -6 -10  786.05   36.76
   3   6  10  711.34   31.46
  -3  -6 -11   89.78    6.83
  -3  -6 -11   82.95   16.01
   3   6  11   85.13   14.39
  -3  -6 -12   38.98   12.59
   3   6  12   32.62   10.20
  -3  -6 -13  101.69   18.96
   3   6  13  117.83   17.85
  -3  -6 -14  110.57   21.00
   3   6  14  104.81   17.29
  -3  -6 -15   21.52   13.11
   3   6  15   25.79   10.42
  -3  -6 -16   -4.06    8.11
  -3  -6 -17   22.93   15.11
  -3  -6 -18   -4.06    9.14
  -3  -6 -19   17.42   15.07
  -3  -6 -20   -2.99   13.06
  -3  -6 -21   -7.68   12.17
   3   7 -16    2.31   14.05
   3   7 -15    4.82   11.91
   3   7 -14  -10.37    9.48
   3   7 -13   22.80   13.79
   3   7 -12   61.86   18.83
   3   7 -11  270.54   30.18
  -3  -7  10    6.53    6.62
   3   7 -10    7.77   10.63
  -3  -7   9   80.82   14.17
   3   7  -9   98.87   20.53
  -3  -7   8    8.58    6.40
   3   7  -8    6.45    5.51
   3   7  -8    9.14    9.52
  -3  -7   7   11.61    6.45
   3   7  -7   14.17    6.70
   3   7  -7   24.42   11.23
  -3  -7   6   88.63   12.76
   3   7  -6   94.90   13.45
   3   7  -6   98.45   18.36
  -3  -7   5    1.45    4.48
   3   7  -5   -1.15    4.44
   3   7  -5   -6.06    4.70
   3   7  -4  598.97   26.13
   3   7  -4  608.40   30.91
  -3  -7   3    2.90    4.10
   3   7  -3   -0.13    4.65
   3   7  -3    0.13    4.78
  -3  -7   2  166.76   13.06
   3   7  -2  170.51   15.41
   3   7  -2  179.14   15.88
  -3  -7   1    4.61    4.40
   3   7  -1    3.76    5.46
   3   7  -1   -0.60    4.18
  -3  -7   0    0.85    5.72
   3   7   0    2.99    4.99
   3   7   0    3.67    4.44
  -3  -7  -1  144.13   13.11
   3   7   1  176.02   15.41
   3   7   1  172.31   12.55
  -3  -7  -2    7.98    5.51
   3   7   2   -1.45    4.14
   3   7   2    2.43    3.46
  -3  -7  -3    5.64    5.25
   3   7   3   20.02    8.11
   3   7   3    9.43    3.84
  -3  -7  -4   68.78   11.27
   3   7   4   79.19   13.02
   3   7   4   88.29    6.45
  -3  -7  -5  153.35   14.34
   3   7   5  165.82   16.52
  -3  -7  -6  219.18   17.50
   3   7   6  227.85   18.49
  -3  -7  -7   31.34    9.56
   3   7   7   46.62   11.57
  -3  -7  -8  397.16   25.10
   3   7   8  421.29   25.40
  -3  -7  -9  121.46   17.72
   3   7   9  133.03   18.87
  -3  -7 -10  423.08   28.18
   3   7  10  436.53   26.64
  -3  -7 -11  248.43   23.82
   3   7  11  238.22   21.18
  -3  -7 -12  314.94   26.81
   3   7  12  307.08   24.12
  -3  -7 -13   18.19   11.23
   3   7  13   21.39   10.29
  -3  -7 -14   10.63    9.99
   3   7  14    3.03    8.32
  -3  -7 -15    0.90    9.35
   3   7  15    5.38    8.45
  -3  -7 -16   65.11   19.25
   3   7  16   40.26   13.02
  -3  -7 -17   14.90   14.13
  -3  -7 -18    9.31   12.25
  -3  -7 -19   -2.39   12.25
  -3  -7 -20   26.26   17.50
  -3  -7 -21   -3.63   13.32
   3   8 -16    3.20   12.47
   3   8 -15    0.26   11.19
   3   8 -14   -2.43   11.78
   3   8 -13   10.20   12.17
   3   8 -12  118.51   25.57
   3   8 -11   33.21   15.67
   3   8 -10  172.90   27.32
  -3  -8   9   20.32    9.14
   3   8  -9   11.95   11.14
  -3  -8   8   28.18    9.69
   3   8  -8   21.26   12.34
  -3  -8   7   29.16    8.84
   3   8  -7   38.89   10.29
   3   8  -7   38.21   14.22
  -3  -8   6   57.68   11.53
   3   8  -6   89.82   13.62
   3   8  -6   83.59   16.86
  -3  -8   5  102.42   12.72
   3   8  -5  119.62   13.66
   3   8  -5   97.68   17.25
  -3  -8   4    1.54    5.17
   3   8  -4   -0.34    5.12
   3   8  -4    2.05    7.21
  -3  -8   3  247.70   17.46
   3   8  -3  250.13   19.13
   3   8  -3  245.61   20.71
  -3  -8   2  295.94   18.40
   3   8  -2  315.49   21.09
   3   8  -2  289.07   20.58
  -3  -8   1   -3.07    4.23
   3   8  -1   -0.68    4.40
   3   8  -1    2.52    4.61
  -3  -8   0  195.62   15.67
   3   8   0  253.42   19.55
   3   8   0  223.92   16.05
  -3  -8  -1    5.98    5.25
   3   8   1   11.78    6.79
   3   8   1    4.78    4.35
  -3  -8  -2   -2.56    4.35
   3   8   2    1.75    5.81
   3   8   2   -0.43    3.46
  -3  -8  -3    4.48    5.25
   3   8   3    1.45    5.25
   3   8   3    8.11    4.06
  -3  -8  -4  182.21   15.84
   3   8   4  175.46   17.08
   3   8   4  182.72   10.12
  -3  -8  -5   41.07   10.37
   3   8   5   28.43    9.61
  -3  -8  -6   30.74    9.09
   3   8   6   34.62   10.46
  -3  -8  -7  254.40   20.58
   3   8   7  281.90   22.41
  -3  -8  -8   30.01    9.95
   3   8   8   24.89    9.65
  -3  -8  -9 1365.93   48.93
   3   8   9 1433.22   49.27
  -3  -8 -10  118.68   20.11
   3   8  10  131.66   20.58
  -3  -8 -11 1040.28   46.19
   3   8  11 1135.18   45.77
  -3  -8 -12   25.44   12.38
   3   8  12   24.59   11.70
  -3  -8 -13   27.28   12.98
   3   8  13   16.27   10.25
  -3  -8 -14    7.39   10.63
   3   8  14   14.34   10.80
  -3  -8 -15   17.12   11.87
   3   8  15   31.59   12.51
  -3  -8 -16    3.16    9.69
   3   8  16    1.58    8.45
  -3  -8 -17   34.75   16.69
  -3  -8 -18    4.99   12.51
  -3  -8 -19    1.96   13.53
  -3  -8 -20    7.34   15.58
   3   9 -15    0.43   13.19
   3   9 -14   14.77   15.16
   3   9 -13    6.62   13.36
   3   9 -12    0.81   10.59
   3   9 -11   40.09   17.89
   3   9 -10  126.84   24.51
  -3  -9   9    3.76    8.54
   3   9  -9    2.99    9.22
  -3  -9   8  309.77   23.86
   3   9  -8  291.16   28.43
  -3  -9   7    0.30    6.62
   3   9  -7    6.10    7.00
   3   9  -7   -5.68    6.62
  -3  -9   6  247.49   20.07
   3   9  -6  245.35   19.68
   3   9  -6  280.02   26.30
  -3  -9   5   43.03   10.80
   3   9  -5   48.03   11.19
   3   9  -5   27.66   10.84
  -3  -9   4   46.66   11.19
   3   9  -4   69.76   13.75
   3   9  -4   51.10   13.32
  -3  -9   3   -0.90    5.21
   3   9  -3    3.03    6.02
   3   9  -3    6.62    7.04
  -3  -9   2  158.52   15.63
   3   9  -2  183.75   17.25
   3   9  -2  145.58   16.61
  -3  -9   1   86.28   14.13
   3   9  -1   95.08   15.92
   3   9  -1  110.62   15.97
  -3  -9   0  258.71   19.34
   3   9   0  261.19   21.43
   3   9   0  294.11   19.55
  -3  -9  -1   73.26   12.89
   3   9   1   70.87   13.66
   3   9   1   65.53   11.48
  -3  -9  -2   -2.65    5.17
   3   9   2   -0.81    5.34
   3   9   2    3.97    4.65
  -3  -9  -3   97.08   14.60
   3   9   3  115.44   17.63
   3   9   3   98.41   10.03
  -3  -9  -4    1.20    5.85
   3   9   4    5.59    6.66
   3   9   4    5.08    3.93
  -3  -9  -5   32.96    9.95
   3   9   5   29.54   10.12
  -3  -9  -6  200.06   18.96
   3   9   6  206.29   20.07
  -3  -9  -7   72.06   14.47
   3   9   7   78.72   16.35
  -3  -9  -8  449.38   29.67
   3   9   8  458.94   29.63
  -3  -9  -9  230.11   22.97
   3   9   9  232.76   22.67
  -3  -9 -10  151.47   22.16
   3   9  10  181.36   21.35
  -3  -9 -11   10.97    9.69
   3   9  11    5.42    9.86
  -3  -9 -12   29.54   13.36
   3   9  12   46.92   14.34
  -3  -9 -13   83.80   19.72
   3   9  13  140.71   22.93
  -3  -9 -14   18.61   12.81
   3   9  14   -0.98    9.82
  -3  -9 -15   50.21   18.02
   3   9  15   51.87   15.88
  -3  -9 -16    8.79   13.75
   3   9  16    3.24   10.80
  -3  -9 -17    6.57   14.05
   3   9  17    1.02   10.03
  -3  -9 -18    8.24   14.26
  -3  -9 -19   19.34   17.46
  -3  -9 -20    2.95   13.75
   3  10 -14    1.07   14.00
   3  10 -13   16.48   15.20
   3  10 -12    2.82   11.83
   3  10 -11   18.49   12.64
   3  10 -10   -4.53    8.41
   3  10  -9  228.27   33.77
  -3 -10   8   65.36   15.24
   3  10  -8   85.81   19.98
  -3 -10   7  176.02   19.72
   3  10  -7  187.76   27.62
  -3 -10   6   -0.04    6.87
   3  10  -6    1.20    6.53
   3  10  -6    3.03    7.86
  -3 -10   5   63.40   13.96
   3  10  -5   49.05   12.42
   3  10  -5   30.40   12.34
  -3 -10   4   -2.43    5.89
   3  10  -4    2.90    6.40
   3  10  -4   -2.05    7.09
  -3 -10   3   -1.07    6.57
   3  10  -3    4.78    7.09
   3  10  -3   -2.22    6.19
  -3 -10   2  142.59   17.16
   3  10  -2  160.91   18.27
   3  10  -2  148.06   17.93
  -3 -10   1  111.17   17.42
   3  10  -1  111.13   17.76
   3  10  -1   89.74   15.45
  -3 -10   0   15.54    8.62
   3  10   0   16.52    9.39
   3  10   0    3.12    6.10
  -3 -10  -1   30.35    9.78
   3  10   1   26.13   11.06
   3  10   1   25.57    8.58
  -3 -10  -2   28.26    9.99
   3  10   2   32.06   11.01
   3  10   2   37.23    8.84
  -3 -10  -3   14.56    8.11
   3  10   3   27.41   10.63
   3  10   3   19.94    6.83
  -3 -10  -4   22.24    9.69
   3  10   4   28.95   10.89
   3  10   4   32.57    7.30
  -3 -10  -5   17.29    8.54
   3  10   5   31.72   11.31
  -3 -10  -6    5.76    7.51
   3  10   6   -0.60    6.70
  -3 -10  -7  158.52   19.64
   3  10   7  154.89   22.80
  -3 -10  -8   97.47   19.34
   3  10   8   78.64   17.97
  -3 -10  -9   29.16   11.53
   3  10   9   24.16   11.74
  -3 -10 -10   40.00   13.19
   3  10  10   42.91   14.43
  -3 -10 -11    0.34    7.04
   3  10  11   -2.22    7.68
  -3 -10 -12   38.72   14.43
   3  10  12   28.69   13.28
  -3 -10 -13   16.35   11.61
   3  10  13   15.84   12.94
  -3 -10 -14  189.08   31.21
   3  10  14  159.16   26.60
  -3 -10 -15   22.41   14.05
   3  10  15   43.97   16.18
  -3 -10 -16   -5.25   10.42
   3  10  16   -8.41    9.48
  -3 -10 -17   -3.50   12.47
   3  10  17    7.09   11.23
  -3 -10 -18   11.87   17.16
  -3 -10 -19   16.35   18.14
   3  11 -13    4.82   12.21
   3  11 -12    7.30   13.19
   3  11 -11   -2.95   11.53
   3  11 -10   39.75   16.99
   3  11  -9   14.56   13.28
   3  11  -8   68.91   20.15
  -3 -11   7   86.37   17.80
   3  11  -7   89.57   21.69
  -3 -11   6   15.20    9.35
   3  11  -6   -2.43    7.73
  -3 -11   5   33.00   12.21
   3  11  -5   26.73   11.23
   3  11  -5   30.57   13.23
  -3 -11   4   10.63    9.05
   3  11  -4   16.14    9.56
   3  11  -4    4.14    7.94
  -3 -11   3   19.38   10.67
   3  11  -3    5.68    8.32
   3  11  -3    6.66    8.58
  -3 -11   2   35.52   11.65
   3  11  -2   35.99   11.61
   3  11  -2   56.01   14.73
  -3 -11   1    7.26    7.81
   3  11  -1    9.65    9.86
   3  11  -1    3.37    7.68
  -3 -11   0    8.03    8.71
   3  11   0    7.43    9.31
   3  11   0    1.71    6.75
  -3 -11  -1  341.84   25.66
   3  11   1  336.03   26.60
   3  11   1  346.66   22.88
  -3 -11  -2   18.44    9.69
   3  11   2   30.95   11.19
   3  11   2   36.67    9.52
  -3 -11  -3   48.37   12.72
   3  11   3   54.99   14.30
   3  11   3   55.88   10.59
  -3 -11  -4  163.13   19.94
   3  11   4  152.28   22.80
  -3 -11  -5   16.91   10.12
   3  11   5   23.52   11.53
   3  11   6  422.57   31.59
  -3 -11  -7   31.34   11.65
   3  11   7   65.96   16.82
  -3 -11  -8    3.46    8.28
   3  11   8   -6.70    7.26
  -3 -11  -9   35.99   14.17
   3  11   9   36.97   14.56
  -3 -11 -10   -2.31    8.28
   3  11  10    3.80   10.84
  -3 -11 -11    3.80    9.56
   3  11  11   -1.54    9.18
  -3 -11 -12   97.55   22.07
   3  11  12   93.50   21.94
  -3 -11 -13   40.47   17.25
   3  11  13   48.80   16.78
  -3 -11 -14   23.61   14.81
   3  11  14   53.41   17.38
  -3 -11 -15   -5.93   11.10
   3  11  15   14.13   12.12
  -3 -11 -16   -6.45   11.74
   3  11  16   -3.37   11.10
  -3 -11 -17    8.84   13.62
   3  11  17   19.17   14.90
  -3 -11 -18   -5.38   12.85
   3  11  18  -11.74    9.78
  -3 -11 -19    0.85   14.05
   3  12 -12    1.02   14.73
   3  12 -11   21.43   15.20
   3  12 -10   -2.65   11.91
   3  12  -9   15.92   14.56
   3  12  -8   34.28   16.56
   3  12  -7   12.17   12.04
  -3 -12   6    2.43    9.56
   3  12  -6   13.79   11.83
  -3 -12   5   41.84   13.66
   3  12  -5   41.41   15.45
   3  12  -5   61.73   18.74
  -3 -12   4   26.00   11.74
   3  12  -4   10.76    9.52
   3  12  -4    8.20   10.25
  -3 -12   3   -3.54    8.03
   3  12  -3    5.04    8.79
   3  12  -3    3.76    8.20
  -3 -12   2   25.15   11.61
   3  12  -2   17.12   11.01
   3  12  -2   11.57    9.14
  -3 -12   1   17.80   10.25
   3  12  -1   31.08   13.06
   3  12  -1   18.70   10.16
  -3 -12   0    5.89   10.12
   3  12   0   -0.85    9.82
   3  12   0    7.09    8.07
  -3 -12  -1    3.59    9.22
   3  12   1    5.17    8.71
   3  12   1   -4.44    5.59
  -3 -12  -2  163.25   22.97
   3  12   2  174.61   25.74
   3  12   2  164.66   17.16
  -3 -12  -3   10.54    9.86
   3  12   3   13.45   10.46
  -3 -12  -4   87.86   18.91
   3  12   4   80.52   18.40
  -3 -12  -5   13.66   11.91
   3  12   5   23.35   11.65
  -3 -12  -6   18.10   10.72
   3  12   6   21.43   12.81
  -3 -12  -7   -3.37    7.73
   3  12   7   11.53   11.91
  -3 -12  -8   89.91   19.72
   3  12   8   79.71   19.00
  -3 -12  -9   13.70   12.04
   3  12   9   23.65   13.19
  -3 -12 -10  120.95   24.76
   3  12  10  104.89   22.03
  -3 -12 -11   14.34   12.59
   3  12  11    7.60   10.46
  -3 -12 -12    6.36   11.48
   3  12  12   -8.37    8.58
  -3 -12 -13   20.71   14.43
   3  12  13   24.85   14.73
  -3 -12 -14  -15.88   10.46
   3  12  14    1.62   11.91
  -3 -12 -15    8.62   14.05
   3  12  15   -0.55   12.47
  -3 -12 -16   26.51   17.08
   3  12  16    4.18   12.47
  -3 -12 -17   -3.97   12.34
   3  12  17  -13.41    8.92
  -3 -12 -18   13.70   16.31
   3  12  18   -0.94   13.11
   3  13 -10   18.87   16.91
   3  13  -9   -0.43   12.34
   3  13  -8    4.27   12.47
   3  13  -7   33.00   16.31
   3  13  -6   76.50   21.39
  -3 -13   5    0.21    9.56
   3  13  -5    5.55   10.93
  -3 -13   4   25.74   13.02
   3  13  -4   27.79   13.62
   3  13  -4   18.57   12.68
  -3 -13   3   -5.08    7.94
   3  13  -3    9.22   10.29
   3  13  -3    0.38    8.71
  -3 -13   2    7.34    9.99
   3  13  -2    6.79   10.29
   3  13  -2    4.82    8.92
  -3 -13   1   -5.42    7.51
   3  13  -1    4.82    8.71
   3  13  -1    2.26    8.54
  -3 -13   0   -0.77    8.03
   3  13   0   -1.58    8.92
   3  13   0    4.99    7.60
  -3 -13  -1   24.04   12.64
   3  13   1   41.62   14.34
   3  13   1   50.76   14.98
  -3 -13  -2   -5.93    8.03
   3  13   2    0.60    8.71
  -3 -13  -3   44.14   14.94
   3  13   3   57.34   17.80
  -3 -13  -4    5.98   11.31
   3  13   4    6.92   10.46
  -3 -13  -5   12.25   10.16
   3  13   5   -3.80    8.03
  -3 -13  -6   34.15   13.53
   3  13   6   24.59   14.34
  -3 -13  -7   93.24   20.45
   3  13   7   95.84   21.39
  -3 -13  -8   82.87   20.88
   3  13   8   97.47   21.77
  -3 -13  -9  197.79   30.10
   3  13   9  161.55   27.41
  -3 -13 -10   43.55   16.44
   3  13  10   48.24   18.10
  -3 -13 -11   11.48   11.70
   3  13  11   -1.58    9.86
  -3 -13 -12   13.45   13.70
   3  13  12   27.41   16.82
  -3 -13 -13    2.90   11.57
   3  13  13   -1.96   12.81
  -3 -13 -14   13.36   15.03
   3  13  14  -10.12   11.95
  -3 -13 -15   28.95   18.23
   3  13  15   32.10   19.00
  -3 -13 -16   -2.09   12.21
   3  13  16   12.68   15.58
  -3 -13 -17    4.61   14.09
   3  13  17  -10.54   10.89
   3  13  18    5.34   15.16
   3  13  19   -9.56   14.47
   3  14  -9   -4.78   10.89
   3  14  -8   18.10   15.84
   3  14  -7    5.85   13.58
   3  14  -6   -1.11   11.74
   3  14  -5    7.47   12.08
  -3 -14   4   28.30   14.64
   3  14  -4   44.23   16.99
  -3 -14   3    8.62   11.36
   3  14  -3   14.43   12.12
   3  14  -3   21.30   12.59
  -3 -14   2   16.14   12.51
   3  14  -2   35.99   15.88
   3  14  -2   23.78   13.06
  -3 -14   1    6.87   11.36
   3  14  -1    8.84   12.51
   3  14  -1    9.22   10.03
  -3 -14   0    2.69    9.95
   3  14   0   10.25   10.59
  -3 -14  -1   16.52   11.95
   3  14   1   19.17   13.58
  -3 -14  -2    4.01    9.65
   3  14   2   23.69   13.06
  -3 -14  -3   -3.07    8.67
   3  14   3    4.61   10.93
  -3 -14  -4    2.95   10.03
   3  14   4   -2.82   10.08
  -3 -14  -5   65.62   18.27
   3  14   5   85.90   22.16
  -3 -14  -6   -2.65    9.56
   3  14   6   -0.38   11.95
  -3 -14  -7  141.40   26.38
   3  14   7  113.01   25.23
  -3 -14  -8   65.40   19.51
   3  14   8   68.05   19.85
  -3 -14  -9  106.39   23.52
   3  14   9   93.07   23.18
  -3 -14 -10   18.61   15.28
   3  14  10    7.56   12.81
  -3 -14 -11   21.22   14.22
   3  14  11   30.06   16.39
  -3 -14 -12   35.69   19.08
   3  14  12    2.39   13.79
  -3 -14 -13  -10.93   11.91
   3  14  13   -0.51   12.85
  -3 -14 -14    9.05   14.39
   3  14  14   29.76   19.13
  -3 -14 -15    6.28   13.87
   3  14  15   21.26   18.57
  -3 -14 -16    4.06   18.74
   3  14  16    5.25   15.50
   3  14  17   15.03   18.44
   3  15  -8   16.78   17.12
   3  15  -7   -0.68   13.58
   3  15  -6   -4.57   11.19
   3  15  -5    4.27   11.83
   3  15  -4    2.56   11.27
  -3 -15   3   31.38   21.30
   3  15  -3   30.14   15.07
  -3 -15   2    8.03   12.51
   3  15  -2   26.55   16.91
  -3 -15   1   -5.64   10.72
   3  15  -1   18.70   15.11
  -3 -15   0    0.43   10.89
   3  15   0   -3.50   11.78
  -3 -15  -1   24.04   14.09
   3  15   1   -5.25   10.89
  -3 -15  -2   -1.11   10.03
   3  15   2    2.99   11.23
  -3 -15  -3    5.21   11.27
   3  15   3    6.92   11.23
  -3 -15  -4    9.86   13.45
   3  15   4    8.79   12.81
  -3 -15  -5    2.35   11.23
   3  15   5   -1.02   11.65
  -3 -15  -6   54.05   18.44
   3  15   6   70.19   21.60
  -3 -15  -7    3.16   11.65
   3  15   7   -0.98   11.61
  -3 -15  -8   52.55   18.66
   3  15   8   72.06   23.35
  -3 -15  -9    1.15   12.04
   3  15   9   -9.48   10.16
  -3 -15 -10   62.97   22.07
   3  15  10   44.87   20.28
  -3 -15 -11   60.03   21.90
   3  15  11   56.10   23.27
  -3 -15 -12    5.42   12.68
   3  15  12   12.21   18.87
  -3 -15 -13   16.48   15.84
   3  15  13   33.73   19.04
  -3 -15 -14    2.43   16.82
   3  15  14    2.99   17.76
   3  15  15   -4.23   14.60
   3  16  -6   -2.95   12.34
   3  16  -5    7.30   14.60
  -3 -16   1   -1.66   13.06
   3  16  -1   19.68   18.91
  -3 -16   0    2.01   13.75
   3  16   0   10.54   18.27
  -3 -16  -1   -5.55   12.04
   3  16   1    5.81   16.48
  -3 -16  -2  -15.20   11.10
   3  16   2   22.71   18.02
  -3 -16  -3  -11.06   10.59
   3  16   3   34.92   21.64
  -3 -16  -4  -11.53   11.06
   3  16   4   24.33   19.81
  -3 -16  -5    9.90   14.22
   3  16   5   33.98   20.36
  -3 -16  -6   -5.76   10.67
   3  16   6   16.18   16.99
  -3 -16  -7    0.60   11.57
   3  16   7   16.18   17.33
  -3 -16  -8   20.96   14.64
   3  16   8   30.82   19.72
  -3 -16  -9    4.61   12.00
   3  16   9   11.10   16.22
  -3 -16 -10   79.79   23.91
   3  16  10   77.23   25.15
  -3 -16 -11    5.25   13.15
   3  16  11   -1.58   13.62
  -3 -16 -12   35.31   19.64
   3  16  12   44.06   21.73
  -3 -17   0   -7.60   11.91
   3  17   0   -3.71   15.50
  -3 -17  -1   -6.70   12.85
   3  17   1   40.30   22.33
  -3 -17  -2   -9.14   12.59
   3  17   2    3.63   18.83
  -3 -17  -3   -6.36   13.02
   3  17   3    6.62   16.09
  -3 -17  -4   20.92   15.58
   3  17   4    7.00   18.31
  -3 -17  -5    0.73   13.70
   3  17   5   12.42   17.46
  -3 -17  -6  -10.59   11.14
   3  17   6    5.68   15.75
  -3 -17  -7    4.06   12.51
   3  17   7    3.59   18.57
  -3 -17  -8   -0.64   14.05
   3  17   8    7.17   17.59
  -3 -17  -9   28.09   18.44
   3  17   9   17.38   19.42
  -3 -17 -10   10.37   15.84
  -3 -18  -1  -14.17   14.43
   3  18   1    2.05   19.89
  -3 -18  -2   -2.95   13.28
   3  18   2    3.24   19.68
  -3 -18  -3   -5.25   14.30
   3  18   3    7.17   22.33
  -3 -18  -4  -10.46   11.74
  -3 -18  -5    2.01   13.79
  -3 -18  -6   10.25   14.81
  -4  15   3   47.47   25.06
  -4  15   2    5.42   17.59
  -4  15   1    0.98   16.05
  -4  15   0   27.92   19.51
  -4  14   6   17.08   15.80
   4 -14  -6   18.06   18.87
  -4  14   5   -8.75   14.00
   4 -14  -5    9.48   15.84
  -4  14   4   34.54   20.88
   4 -14  -4   40.17   23.31
  -4  14   3    9.43   17.42
   4 -14  -3    2.26   18.70
  -4  14   2    2.60   17.08
   4 -14  -2   17.38   19.51
  -4  14   1   24.46   19.17
   4 -14  -1   24.85   14.34
   4 -14  -1   40.86   22.41
  -4  14   0   -4.23   15.80
   4 -14   0    6.28   18.61
  -4  14  -1    5.81   16.14
   4 -14   1   17.93   19.34
   4 -14   2    6.96   18.31
   4 -14   3   -2.26   17.59
   4 -13 -10   14.90   16.86
  -4  13   9    0.13   14.98
   4 -13  -9    0.60   14.17
  -4  13   8   14.00   16.48
   4 -13  -8   -1.96   12.89
  -4  13   7   18.27   17.72
   4 -13  -7   16.82   18.23
  -4  13   6    6.15   14.52
   4 -13  -6   14.73   17.16
  -4  13   5   13.66   15.63
   4 -13  -5   22.07   17.93
  -4  13   4   13.06   17.42
   4 -13  -4   10.59   15.75
  -4  13   3  -11.40   13.28
   4 -13  -3    8.71   11.53
   4 -13  -3   -8.07   14.86
  -4  13   2   68.52   22.84
   4 -13  -2   40.73   15.84
   4 -13  -2   60.79   23.31
  -4  13   1   -7.39   13.19
   4 -13  -1   -7.77   15.16
  -4  13   0   68.52   22.50
   4 -13   0  110.02   30.65
  -4  13  -1  -11.01   12.00
   4 -13   1   -4.78   15.75
  -4  13  -2   14.94   15.88
   4 -13   2   23.78   19.51
   4 -13   3    3.20   17.29
   4 -13   4   -1.79   13.75
   4 -13   5   -8.88   13.83
   4 -13   6   30.31   19.64
   4 -13   7   -6.66   16.82
   4 -12 -12    2.52   11.48
  -4  12  11   -0.13   12.42
   4 -12 -11    5.34   13.23
  -4  12  10    3.59   13.79
   4 -12 -10    5.59   13.92
  -4  12   9  -11.36   11.06
   4 -12  -9   -3.97   13.79
  -4  12   8   57.46   22.11
   4 -12  -8  101.95   28.26
  -4  12   7   11.95   14.47
   4 -12  -7   16.44   15.24
  -4  12   6   12.00   13.49
   4 -12  -6    4.99   15.84
  -4  12   5   -1.02   10.29
   4 -12  -5   -4.48   12.47
   4 -12  -5   10.03   14.39
  -4  12   4   -0.09   13.15
   4 -12  -4    5.12    9.82
   4 -12  -4    1.75   13.23
  -4  12   3   58.19   20.07
   4 -12  -3   80.82   18.87
   4 -12  -3  109.25   27.07
  -4  12   2   38.64   17.97
   4 -12  -2   47.47   16.48
   4 -12  -2   51.27   20.19
  -4  12   1   26.30   14.81
   4 -12  -1   40.86   18.19
  -4  12   0   23.18   13.62
   4 -12   0   15.67   17.42
  -4  12  -1   12.68   12.72
   4 -12   1   20.11   17.16
  -4  12  -2   11.61   12.21
   4 -12   2   11.40   14.43
  -4  12  -3   15.37   12.21
   4 -12   3    0.77   14.22
   4 -12   4   -6.28   13.66
   4 -12   5   -5.51   12.85
   4 -12   6   -5.21   13.36
   4 -12   7  -13.32   12.94
   4 -12   8   -3.54   12.94
   4 -12   9   -2.65   13.41
   4 -12  10   -2.60   17.20
   4 -11 -14   -3.97   13.15
  -4  11  13    0.00   11.87
   4 -11 -13    0.98   11.65
  -4  11  12   -2.60   12.42
   4 -11 -12   -0.38   11.44
  -4  11  11    5.04   12.68
   4 -11 -11   -2.22   11.83
  -4  11  10   -2.52   11.36
   4 -11 -10    4.82   10.29
  -4  11   9   25.83   15.71
   4 -11  -9   39.49   19.21
  -4  11   8   -4.57    8.97
   4 -11  -8  -10.46    9.35
  -4  11   7   15.88   15.07
   4 -11  -7   31.55   17.25
  -4  11   6    6.79   13.45
   4 -11  -6   -1.15    8.54
   4 -11  -6   -6.75   12.38
  -4  11   5   -6.62   11.53
   4 -11  -5    5.72    8.79
   4 -11  -5   10.80   14.64
  -4  11   4   54.26   18.19
   4 -11  -4   80.39   18.14
   4 -11  -4  128.33   26.77
  -4  11   3   39.53   17.08
   4 -11  -3   24.04   12.34
   4 -11  -3   38.34   17.38
  -4  11   2   49.74   18.10
   4 -11  -2   41.11   14.52
   4 -11  -2   38.12   17.08
  -4  11   1   77.87   19.55
   4 -11  -1  108.22   25.27
  -4  11   0   -5.72    8.88
   4 -11   0   -5.04   11.78
  -4  11  -1   62.07   17.46
   4 -11   1   51.19   18.87
  -4  11  -2   16.91   12.38
   4 -11   2   -5.64   10.80
  -4  11  -3   40.51   15.03
   4 -11   3   51.27   18.14
   4 -11   4   17.72   15.03
   4 -11   5   60.71   21.52
   4 -11   6    9.61   13.83
   4 -11   7    5.21   13.49
   4 -11   8   55.29   21.64
   4 -11   9    3.46   14.52
   4 -11  10    7.34   16.22
   4 -11  11   -0.04   14.34
   4 -11  12   12.08   28.22
  -4  10  15   -3.37   12.08
   4 -10 -15    5.85   13.66
  -4  10  14   -3.67   10.93
   4 -10 -14    6.96   12.30
  -4  10  13   16.44   14.13
   4 -10 -13    4.01   12.47
  -4  10  12    8.32   13.79
   4 -10 -12   10.89   13.36
  -4  10  11   -0.81   10.59
   4 -10 -11    7.34   11.06
  -4  10  10    9.39   12.94
   4 -10 -10   13.11   10.67
  -4  10   9   -9.65    7.90
   4 -10  -9   -9.73    9.73
  -4  10   8   -6.02   11.23
   4 -10  -8    1.79    8.58
   4 -10  -8    1.84   11.65
  -4  10   7   15.20   13.45
   4 -10  -7   21.99   11.19
   4 -10  -7   27.28   14.00
  -4  10   6   13.15   12.51
   4 -10  -6   17.93   10.89
   4 -10  -6   18.70   14.30
  -4  10   5   83.80   21.47
   4 -10  -5   78.13   17.72
   4 -10  -5   65.87   20.71
  -4  10   4   63.70   19.72
   4 -10  -4   45.00   13.70
   4 -10  -4   37.18   15.75
  -4  10   3  176.75   27.84
   4 -10  -3  149.59   23.35
   4 -10  -3  143.06   25.91
  -4  10   2   68.31   18.44
   4 -10  -2   49.05   14.22
   4 -10  -2   62.25   18.44
  -4  10   1    1.62   11.14
   4 -10  -1    7.04   10.72
  -4  10   0   64.81   18.14
   4 -10   0   72.58   20.07
  -4  10  -1   67.75   17.80
   4 -10   1   37.10   15.63
  -4  10  -2   53.83   16.31
   4 -10   2   43.33   17.80
  -4  10  -3   -3.03    8.45
   4 -10   3   -4.91    9.99
  -4  10  -4   75.65   16.74
   4 -10   4   66.98   19.77
   4 -10   5    1.11   12.76
   4 -10   6   12.64   13.06
   4 -10   7    0.64   10.80
   4 -10   8   -4.31   12.17
   4 -10   9   35.65   17.46
   4 -10  10   10.80   14.90
   4 -10  11    0.30   12.21
   4 -10  12   -4.35   11.83
   4 -10  13    7.00   15.92
   4  -9 -17   15.97   22.46
  -4   9  16   -0.21   11.19
   4  -9 -16   12.98   13.96
  -4   9  15    2.01   12.21
   4  -9 -15    0.43   11.06
  -4   9  14   -2.69   10.37
   4  -9 -14  -12.30    8.92
  -4   9  13   -2.09   11.65
   4  -9 -13    5.08   10.72
  -4   9  12   22.33   15.11
   4  -9 -12    2.99   10.97
  -4   9  11   67.03   19.94
   4  -9 -11   74.88   20.36
  -4   9  10    1.15   12.00
   4  -9 -10    1.45    8.92
  -4   9   9   17.33   12.42
   4  -9  -9   13.41    9.65
   4  -9  -9    4.53   10.54
  -4   9   8   16.05   12.25
   4  -9  -8   25.23   11.48
   4  -9  -8   30.57   14.77
  -4   9   7  131.92   25.36
   4  -9  -7  108.48   19.08
   4  -9  -7  113.13   22.97
  -4   9   6    7.13   11.06
   4  -9  -6    7.86    8.50
   4  -9  -6    8.67   12.47
  -4   9   5  112.71   22.33
   4  -9  -5  114.03   19.72
   4  -9  -5  113.90   22.75
  -4   9   4   23.10   12.72
   4  -9  -4   37.06   12.64
   4  -9  -4   29.88   13.41
  -4   9   3   76.25   20.36
   4  -9  -3   60.41   14.94
   4  -9  -3   66.90   18.02
  -4   9   2    0.47   12.21
   4  -9  -2    4.35    7.90
   4  -9  -2    3.42    9.95
  -4   9   1   44.57   16.56
   4  -9  -1   30.82   12.81
  -4   9   0   73.05   18.87
   4  -9   0   44.14   15.58
  -4   9  -1    1.20   11.65
   4  -9   1   -1.79    8.92
  -4   9  -2   54.22   15.75
   4  -9   2   47.13   15.88
  -4   9  -3   15.50   10.50
   4  -9   3   19.38   12.59
  -4   9  -4   -5.08    6.83
   4  -9   4   -1.28   10.29
  -4   9  -5   -0.85    7.64
   4  -9   5    0.47    9.26
   4  -9   6   18.83   13.87
   4  -9   7    3.59    9.82
   4  -9   8   -0.30    9.86
   4  -9   9    5.85   11.70
   4  -9  10   -2.43    9.95
   4  -9  11    7.77   14.09
  -4   9 -12   -5.55   10.33
   4  -9  12   -6.53   11.87
  -4   9 -13    9.18   13.87
   4  -9  13    5.46   14.17
  -4   9 -14   14.30   15.20
   4  -9  14    5.12   14.22
   4  -9  15   28.65   20.62
  -4   8  17    6.57   12.85
   4  -8 -17    3.29   12.55
  -4   8  16   15.33   14.00
   4  -8 -16    2.31   11.10
  -4   8  15   53.83   18.78
   4  -8 -15   15.71   13.92
  -4   8  14   -8.28   10.59
   4  -8 -14    0.21    9.43
  -4   8  13    0.47    9.90
   4  -8 -13   -2.35    9.26
  -4   8  12   78.55   20.83
   4  -8 -12   56.78   18.57
  -4   8  11    2.56   10.03
   4  -8 -11    1.15    9.95
   4  -8 -11   -3.93    8.03
  -4   8  10   35.86   14.60
   4  -8 -10   25.02   11.01
   4  -8 -10   12.72   11.23
  -4   8   9    8.20    9.99
   4  -8  -9    5.68    8.41
   4  -8  -9    8.11    9.90
  -4   8   8   20.02   12.76
   4  -8  -8   12.04    8.84
   4  -8  -8   14.86   10.63
  -4   8   7   -0.94    8.45
   4  -8  -7    4.95    7.51
   4  -8  -7   -5.25    8.24
  -4   8   6   54.82   16.65
   4  -8  -6   63.36   15.16
   4  -8  -6   65.49   16.39
  -4   8   5   93.88   19.25
   4  -8  -5   81.80   16.01
   4  -8  -5  106.22   20.79
  -4   8   4  121.89   22.07
   4  -8  -4  133.80   20.96
   4  -8  -4  111.64   19.85
  -4   8   3  164.15   25.62
   4  -8  -3  202.06   21.22
   4  -8  -3  137.81   23.22
  -4   8   2  117.06   21.86
   4  -8  -2  136.23   20.53
   4  -8  -2   83.72   17.72
  -4   8   1  289.62   28.01
   4  -8  -1  289.92   27.28
  -4   8   0  223.75   25.02
   4  -8   0  213.20   24.29
  -4   8  -1  141.35   22.75
   4  -8   1  141.95   22.46
  -4   8  -2   -2.13    8.67
   4  -8   2    3.20    8.97
  -4   8  -3   24.33   10.46
   4  -8   3   16.56   10.80
  -4   8  -4  107.71   16.69
   4  -8   4  106.18   20.53
  -4   8  -5    7.39    8.71
   4  -8   5   30.10   13.87
  -4   8  -6   -1.71    5.68
   4  -8   6    7.77    9.95
   4  -8   7  109.80   22.58
   4  -8   8   29.29   15.11
   4  -8   9    3.20    9.65
  -4   8 -10    0.38   10.93
   4  -8  10   18.53   12.38
  -4   8 -11    6.92   11.14
   4  -8  11   -3.76   10.25
  -4   8 -12    4.95   10.25
   4  -8  12   10.03   13.79
  -4   8 -13    0.68    9.31
   4  -8  13    7.17   13.79
  -4   8 -14   -1.54    9.14
   4  -8  14   11.74   13.02
  -4   8 -15   17.33   15.20
   4  -8  15   40.77   18.23
   4  -8  16    3.16   13.75
  -4   7  17   12.51   20.02
   4  -7 -17    4.48   12.55
  -4   7  16    4.87   11.53
   4  -7 -16    2.09   10.46
  -4   7  15   14.09   13.79
   4  -7 -15    5.93   11.01
  -4   7  14   14.69   12.12
   4  -7 -14    0.21   10.20
  -4   7  13   14.94   11.40
   4  -7 -13    9.26   11.44
  -4   7  12    6.75   10.50
   4  -7 -12   -1.20    7.86
   4  -7 -12   -3.46    8.45
  -4   7  11   -0.64    9.26
   4  -7 -11   -7.13    6.28
   4  -7 -11   -0.64    8.50
  -4   7  10   11.53   10.37
   4  -7 -10    8.88    8.79
   4  -7 -10   19.25   10.67
  -4   7   9    9.69    9.35
   4  -7  -9   -3.37    6.10
   4  -7  -9    5.85    8.62
  -4   7   8   86.02   19.68
   4  -7  -8   89.14   16.91
   4  -7  -8  106.69   19.85
  -4   7   7   58.87   16.14
   4  -7  -7   49.39   13.19
   4  -7  -7   58.96   15.67
  -4   7   6   82.99   19.13
   4  -7  -6  101.78   17.16
   4  -7  -6  111.00   20.11
  -4   7   5    6.92    8.54
   4  -7  -5    6.23    7.34
   4  -7  -5   -3.71    5.72
  -4   7   4  419.45   29.97
   4  -7  -4  392.60   26.77
   4  -7  -4  439.64   30.57
  -4   7   3  126.03   21.22
   4  -7  -3   94.86   16.91
   4  -7  -3   97.12   17.55
  -4   7   2  529.89   32.32
   4  -7  -2  527.42   30.74
   4  -7  -2  566.91   33.81
  -4   7   1  175.38   23.69
   4  -7  -1  161.21   22.54
  -4   7   0  512.69   30.35
   4  -7   0  493.90   31.29
  -4   7  -1   41.88   12.94
   4  -7   1   30.82   12.30
  -4   7  -2   -3.67    6.83
   4  -7   2    8.88    8.71
  -4   7  -3   57.42   12.98
   4  -7   3   35.09   12.17
  -4   7  -4   87.18   14.90
   4  -7   4   90.98   18.36
  -4   7  -5   16.14    8.84
   4  -7   5   23.44   11.06
  -4   7  -6    4.95    5.46
   4  -7   6   -0.21    8.54
   4  -7   7    7.13    9.35
   4  -7   8   39.45   15.20
  -4   7  -9   43.80   15.45
   4  -7   9   41.45   15.11
  -4   7 -10   36.46   15.50
   4  -7  10   44.95   15.97
  -4   7 -11    9.01   10.80
   4  -7  11    2.18    9.18
  -4   7 -12   12.94   12.00
   4  -7  12   13.32   11.83
  -4   7 -13    4.44   11.06
   4  -7  13   -6.36    7.98
  -4   7 -14    0.77    9.18
   4  -7  14   -2.90    9.09
  -4   7 -15   -7.39    9.95
   4  -7  15    2.69   10.42
  -4   7 -16   22.50   16.09
   4  -7  16   18.87   15.71
   4  -7  17   18.70   16.78
   4  -6 -17   -3.93   12.12
  -4   6  16   12.89   12.25
   4  -6 -16   -2.09    9.86
  -4   6  15   12.04   12.38
   4  -6 -15    7.94   10.93
  -4   6  14    8.11   10.59
   4  -6 -14   -0.64    9.56
  -4   6  13    7.56    9.73
   4  -6 -13   -2.73    8.58
   4  -6 -13    3.59    9.22
  -4   6  12   25.40   13.23
   4  -6 -12   31.42   12.42
   4  -6 -12   21.43   11.83
  -4   6  11    7.86   10.12
   4  -6 -11    4.61    7.47
   4  -6 -11    3.12    9.26
  -4   6  10   46.62   16.09
   4  -6 -10   47.35   13.41
   4  -6 -10   32.40   11.70
  -4   6   9   38.94   14.81
   4  -6  -9   22.11   10.63
   4  -6  -9   15.88    9.31
  -4   6   8   22.88   11.31
   4  -6  -8   13.49    8.84
   4  -6  -8   12.42    9.26
  -4   6   7   18.02   10.37
   4  -6  -7   12.94    8.32
   4  -6  -7    7.04    7.90
  -4   6   6   28.09   12.21
   4  -6  -6   28.73   10.46
   4  -6  -6   29.20   11.48
  -4   6   5  366.47   27.45
   4  -6  -5  502.96   28.86
   4  -6  -5  379.15   27.07
  -4   6   4    3.37    6.62
   4  -6  -4    5.17    6.96
   4  -6  -4   -2.39    5.29
  -4   6   3  562.13   31.85
   4  -6  -3  573.10   30.40
   4  -6  -3  597.52   32.57
  -4   6   2   35.90   11.01
   4  -6  -2   51.70   12.89
   4  -6  -2   18.61    9.14
  -4   6   1  471.19   28.60
   4  -6  -1  482.55   29.37
  -4   6   0   15.28    7.94
   4  -6   0   17.29    8.20
  -4   6  -1  115.87   16.99
   4  -6   1  116.59   18.49
  -4   6  -2  329.63   22.33
   4  -6   2  310.24   24.89
  -4   6  -3   14.34    7.51
   4  -6   3   21.94   10.54
  -4   6  -4   46.11   10.54
   4  -6   4   36.54   11.65
  -4   6  -5    1.41    5.25
   4  -6   5   -3.46    6.49
  -4   6  -6   53.96   10.12
   4  -6   6   53.07   14.90
  -4   6  -7   26.47    7.60
   4  -6   7   35.78   12.76
  -4   6  -8   -1.84    7.04
   4  -6   8    1.41    6.92
  -4   6  -9   44.53   14.64
   4  -6   9   50.29   14.69
  -4   6 -10    8.84   10.20
   4  -6  10   16.91   10.67
  -4   6 -11  145.62   25.36
   4  -6  11  113.13   22.16
  -4   6 -12   -9.18    7.77
   4  -6  12   -1.15    8.58
  -4   6 -13   10.46   12.38
   4  -6  13   10.63   12.25
  -4   6 -14    3.20   10.29
   4  -6  14   11.40   12.34
  -4   6 -15   -6.28    9.69
   4  -6  15   -1.79   10.59
  -4   6 -16    2.82   11.44
   4  -6  16    1.28   10.12
  -4   6 -17   -3.20   11.70
   4  -6  17    6.23   12.00
   4  -6  18   42.22   18.66
  -4   5  16   -7.04    9.65
   4  -5 -16    4.87   10.29
  -4   5  15    8.50   10.20
   4  -5 -15    1.15    9.69
   4  -5 -15    2.09    9.39
  -4   5  14    5.85    9.95
   4  -5 -14    9.22    9.73
   4  -5 -14   -3.59    8.24
  -4   5  13    3.03    9.05
   4  -5 -13    4.23    8.79
   4  -5 -13   -1.84    7.77
  -4   5  12   10.03   10.20
   4  -5 -12   -0.21    7.04
   4  -5 -12    6.87    9.14
  -4   5  11    9.43    9.14
   4  -5 -11    2.99    7.68
   4  -5 -11    2.77    6.83
  -4   5  10    3.16    8.32
   4  -5 -10    1.07    7.13
   4  -5 -10    9.01    8.37
  -4   5   9  115.65   20.71
   4  -5  -9   93.28   17.03
   4  -5  -9  140.71   20.66
  -4   5   8   -3.54    6.45
   4  -5  -8   -1.84    5.85
   4  -5  -8    6.62    7.60
  -4   5   7   64.64   15.88
   4  -5  -7   55.71   12.68
   4  -5  -7   52.90   12.94
  -4   5   6  313.87   25.40
   4  -5  -6  254.40   20.96
   4  -5  -6  266.74   22.11
  -4   5   5    0.30    5.81
   4  -5  -5   -1.45    4.82
   4  -5  -5   -0.81    5.08
  -4   5   4 1067.26   42.22
   4  -5  -4  935.77   36.67
   4  -5  -4 1134.12   41.33
  -4   5   3   63.27   13.75
   4  -5  -3   44.02   10.80
   4  -5  -3   48.16   11.87
  -4   5   2   44.44   11.44
   4  -5  -2   36.12    9.78
   4  -5  -2   28.99   10.03
  -4   5   1  195.32   18.27
   4  -5  -1  182.85   17.42
  -4   5   0   38.25   10.29
   4  -5   0   26.34    9.73
  -4   5  -1  422.78   24.25
   4  -5   1  384.48   24.46
  -4   5  -2   79.24   13.11
   4  -5   2   56.23   12.38
  -4   5  -3  380.26   21.60
   4  -5   3  401.90   25.83
  -4   5  -4    2.48    5.21
   4  -5   4    8.28    7.26
  -4   5  -5   45.81    9.26
   4  -5   5   38.55   11.19
  -4   5  -6  127.56   11.95
   4  -5   6  122.57   19.42
  -4   5  -7   26.00    6.75
   4  -5   7    4.65    6.96
  -4   5  -8    4.35    7.26
   4  -5   8    4.65    7.73
  -4   5  -9    1.79    8.03
   4  -5   9    8.03    8.67
  -4   5 -10  154.50   24.80
   4  -5  10  132.60   22.54
  -4   5 -11    4.70   10.08
   4  -5  11   -0.09    8.15
  -4   5 -12    6.87   10.54
   4  -5  12    4.87    9.78
  -4   5 -13   35.95   14.94
   4  -5  13   39.66   15.71
  -4   5 -14    1.41    9.26
   4  -5  14   -4.70    9.22
  -4   5 -15   30.18   14.73
   4  -5  15   24.80   14.64
  -4   5 -16   10.08   10.67
   4  -5  16   18.10   13.11
  -4   5 -17   14.52   14.56
   4  -5  17   34.15   17.03
  -4   5 -18    8.32   12.38
   4  -5  18    6.87   13.41
  -4   5 -19    8.15   16.86
   4  -5  19   14.73   24.55
   4  -4 -16   10.03   12.94
   4  -4 -16    0.98   12.12
  -4   4  15   30.27   13.87
   4  -4 -15   23.69   13.45
   4  -4 -15   25.40   12.98
  -4   4  14    0.00    8.71
   4  -4 -14    5.38   10.33
   4  -4 -14    5.72    9.43
  -4   4  13   10.46    8.71
   4  -4 -13   16.01   10.84
   4  -4 -13   11.27    9.22
  -4   4  12   -3.07    7.34
   4  -4 -12    4.01    8.50
   4  -4 -12   -2.26    6.96
  -4   4  11   -3.88    6.32
   4  -4 -11    7.34    7.81
   4  -4 -11   -3.59    5.59
  -4   4  10   10.46    8.88
   4  -4 -10    3.42    7.13
   4  -4 -10    7.13    7.64
  -4   4   9   79.49   16.27
   4  -4  -9   88.93   15.88
   4  -4  -9   73.26   14.60
  -4   4   8   16.39   10.12
   4  -4  -8   25.91    9.82
   4  -4  -8   25.70    9.48
  -4   4   7  519.90   30.65
   4  -4  -7  504.71   28.39
   4  -4  -7  517.09   28.35
  -4   4   6   16.91    9.22
   4  -4  -6   20.88    9.09
   4  -4  -6   11.19    7.68
  -4   4   5  890.81   37.78
   4  -4  -5  840.69   34.58
   4  -4  -5  877.24   34.54
  -4   4   4  161.50   17.46
   4  -4  -4  151.00   16.05
   4  -4  -4  152.37   15.03
  -4   4   3  174.70   17.03
   4  -4  -3  209.36   17.80
   4  -4  -3  172.13   16.18
  -4   4   2   12.21    6.83
   4  -4  -2    6.83    5.89
   4  -4  -2   10.72    6.40
  -4   4   1  349.09   22.24
   4  -4  -1  323.86   21.52
   4  -4  -1  339.23   21.64
  -4   4   0 1641.55   44.61
   4  -4   0 1490.64   43.20
  -4   4  -1    6.45    5.64
   4  -4   1    3.71    6.23
  -4   4  -2 1170.62   35.82
   4  -4   2 1088.09   37.83
  -4   4  -3    1.24    4.14
   4  -4   3    4.31    5.72
  -4   4  -4  189.94   14.34
   4  -4   4  196.00   17.97
  -4   4  -5    9.69    5.17
   4  -4   5   15.84    7.51
  -4   4  -6  135.29   11.57
   4  -4   6  115.31   17.85
  -4   4  -7   65.92    9.09
  -4   4  -7   84.87   16.14
   4  -4   7   65.36   13.62
  -4   4  -8   19.34    5.25
  -4   4  -8   12.08    8.24
   4  -4   8   23.78    9.65
  -4   4  -9   11.23    8.37
   4  -4   9   15.71    9.56
  -4   4 -10   -4.27    5.55
   4  -4  10    3.50    8.24
  -4   4 -11    1.49    7.43
   4  -4  11    9.18    8.88
  -4   4 -12  129.61   22.80
   4  -4  12   83.42   18.19
  -4   4 -13    8.92   10.08
   4  -4  13   -0.13    8.62
  -4   4 -14  125.17   23.05
   4  -4  14   71.77   18.10
  -4   4 -15   -1.15    9.05
   4  -4  15   -0.26    9.78
  -4   4 -16   52.77   18.57
   4  -4  16   52.64   18.74
  -4   4 -17    5.76   11.14
   4  -4  17   -0.43   11.83
  -4   4 -18   16.74   13.32
   4  -4  18    0.09   12.42
  -4   4 -19   10.89   13.19
   4  -4  19    4.61   13.23
   4  -3 -17   44.83   19.38
   4  -3 -16   11.87   11.65
   4  -3 -15    4.95    9.90
   4  -3 -15    8.75    9.43
  -4   3  14   10.03    9.99
   4  -3 -14    2.65    9.31
   4  -3 -14   23.18   11.36
  -4   3  13    4.95    8.03
   4  -3 -13   -5.08    7.68
   4  -3 -13    3.12    8.32
  -4   3  12   -3.93    7.30
   4  -3 -12    5.04    7.73
   4  -3 -12    1.20    7.39
  -4   3  11    2.69    7.09
   4  -3 -11    2.26    7.47
   4  -3 -11    8.45    8.03
  -4   3  10   55.41   14.17
   4  -3 -10   63.70   14.47
   4  -3 -10   69.25   14.09
  -4   3   9    8.62    7.26
   4  -3  -9    3.54    6.32
   4  -3  -9    9.43    7.21
  -4   3   8   17.59    9.26
   4  -3  -8   12.17    7.47
   4  -3  -8   10.03    6.28
  -4   3   7   11.70    7.98
   4  -3  -7    5.81    6.75
   4  -3  -7    9.18    6.36
  -4   3   6  540.31   29.41
   4  -3  -6  548.72   28.39
   4  -3  -6  473.28   24.68
  -4   3   5  536.26   28.18
   4  -3  -5  517.09   26.81
   4  -3  -5  533.01   25.27
  -4   3   4  399.34   23.95
   4  -3  -4  409.29   23.61
   4  -3  -4  380.98   21.09
  -4   3   3  400.71   23.48
   4  -3  -3  414.20   23.18
   4  -3  -3  442.33   22.37
  -4   3   2  297.35   20.02
   4  -3  -2  289.96   19.21
   4  -3  -2  322.71   19.08
  -4   3   1  479.82   24.04
   4  -3  -1  494.84   24.72
   4  -3  -1  465.13   22.88
  -4   3   0  271.56   18.27
   4  -3   0  254.49   17.46
  -4   3  -1  180.29   14.94
   4  -3   1  178.62   15.11
  -4   3  -2   45.77    9.26
   4  -3   2   50.55   10.20
  -4   3  -3  143.49   12.55
   4  -3   3  160.27   15.45
  -4   3  -4  352.72   17.76
   4  -3   4  311.82   21.09
  -4   3  -5  162.66   12.08
   4  -3   5  141.82   15.20
  -4   3  -6   75.57    8.37
   4  -3   6   61.78   12.25
  -4   3  -7  130.47    9.90
  -4   3  -7  127.65   18.36
   4  -3   7   94.73   16.01
  -4   3  -8    5.08    3.29
  -4   3  -8    7.21    7.64
   4  -3   8    8.79    7.09
  -4   3  -9   81.20    7.17
  -4   3  -9   91.06   17.29
   4  -3   9  102.76   18.10
  -4   3 -10    3.20    6.57
  -4   3 -10   16.22   10.25
   4  -3  10    1.15    7.43
  -4   3 -11   55.76   14.90
  -4   3 -11   68.26   16.74
   4  -3  11   67.28   16.09
  -4   3 -12   69.29   16.86
  -4   3 -12   67.37   16.74
   4  -3  12   59.85   15.67
  -4   3 -13  329.63   28.69
  -4   3 -13  277.07   28.43
   4  -3  13  263.15   27.11
  -4   3 -14   68.52   18.23
  -4   3 -14   94.05   22.37
   4  -3  14   64.98   18.10
  -4   3 -15   55.07   16.44
  -4   3 -15   31.85   15.24
   4  -3  15   53.79   16.48
  -4   3 -16   -0.98    8.75
  -4   3 -16  -12.42    9.69
   4  -3  16   -0.30   10.16
  -4   3 -17    4.31   11.23
  -4   3 -17   -5.81    9.73
   4  -3  17    0.34    9.48
  -4   3 -18   -2.39   10.12
  -4   3 -18    6.66   14.86
   4  -3  18   11.23   13.06
  -4   3 -19   -7.04    9.95
  -4   3 -19   -2.09   13.62
   4  -3  19   -2.18   11.95
  -4   3 -20    0.26    9.95
  -4   3 -20   40.34   21.73
   4  -3  20   -0.04   12.34
   4  -2 -18   19.51   15.54
   4  -2 -17   -0.13   11.40
   4  -2 -16    3.20   10.80
   4  -2 -15   19.04   12.30
  -4   2  14   11.40    9.35
   4  -2 -14   21.26   11.95
   4  -2 -14   21.99   11.27
  -4   2  13    1.32    8.37
   4  -2 -13   10.50   10.20
   4  -2 -13    1.24    7.43
  -4   2  12    2.18    7.94
   4  -2 -12    0.51    8.58
   4  -2 -12   15.80    9.14
  -4   2  11   21.35   10.33
   4  -2 -11   20.15   10.20
   4  -2 -11   29.41   10.08
  -4   2  10    3.29    6.49
   4  -2 -10   -0.94    6.53
   4  -2 -10    5.25    6.32
  -4   2   9    1.41    5.98
   4  -2  -9    9.95    7.73
   4  -2  -9   12.38    6.57
  -4   2   8   73.86   14.77
   4  -2  -8   74.33   14.43
   4  -2  -8   67.37   12.12
  -4   2   7    1.02    5.98
   4  -2  -7    1.71    5.59
   4  -2  -7    5.38    4.82
  -4   2   6  372.57   23.69
   4  -2  -6  310.50   21.73
   4  -2  -6  342.60   19.60
  -4   2   5   10.08    7.04
   4  -2  -5   12.47    6.53
   4  -2  -5   17.29    6.10
  -4   2   4 1622.34   44.87
   4  -2  -4 1266.72   38.76
   4  -2  -4 1590.49   38.00
  -4   2   3  289.37   19.47
   4  -2  -3  328.30   19.89
   4  -2  -3  277.84   16.48
  -4   2   2   -1.75    5.55
   4  -2  -2   -1.15    4.31
   4  -2  -2    9.90    5.34
  -4   2   1  802.87   29.41
   4  -2  -1  847.48   29.97
   4  -2  -1  789.97   25.87
  -4   2   0  409.08   20.62
   4  -2   0  423.76   21.90
   4  -2   0  389.31   19.08
  -4   2  -1   55.54   10.20
   4  -2   1   55.97    9.69
  -4   2  -2  347.60   18.19
   4  -2   2  283.90   17.16
  -4   2  -3  259.91   15.50
   4  -2   3  261.57   17.16
  -4   2  -4   14.73    5.55
   4  -2   4   13.58    6.92
  -4   2  -5  263.20   14.13
   4  -2   5  243.81   18.44
  -4   2  -6   20.45    5.34
   4  -2   6   21.13    8.24
  -4   2  -7   36.16    6.15
  -4   2  -7   52.77   11.91
  -4   2  -7   39.66   10.12
   4  -2   7   25.66    8.71
  -4   2  -8  293.17   11.95
  -4   2  -8  327.62   22.88
  -4   2  -8  317.50   23.57
   4  -2   8  301.45   22.63
  -4   2  -9  124.62   15.41
  -4   2  -9  108.86   18.02
   4  -2   9  113.73    6.87
   4  -2   9  113.30   17.93
  -4   2 -10  142.51   20.32
  -4   2 -10  116.93   18.23
   4  -2  10   85.30   15.80
  -4   2 -11  159.54   19.08
  -4   2 -11  150.83   21.94
   4  -2  11  143.83   21.47
  -4   2 -12   97.64   18.91
  -4   2 -12   72.79   16.78
   4  -2  12   76.63   16.65
  -4   2 -13  128.20   21.05
  -4   2 -13  151.94   24.42
   4  -2  13  151.94   24.08
  -4   2 -14   38.08   13.28
  -4   2 -14   42.91   15.71
   4  -2  14   35.35   13.87
  -4   2 -15  106.35   21.56
  -4   2 -15   84.15   21.60
   4  -2  15   80.13   19.55
  -4   2 -16   13.23   11.65
  -4   2 -16    7.60   11.48
   4  -2  16   12.85   11.78
  -4   2 -17    0.60    9.56
  -4   2 -17   14.64   14.30
   4  -2  17   -0.73   10.76
  -4   2 -18    2.95   10.12
  -4   2 -18    9.65   12.04
   4  -2  18    7.34   10.80
  -4   2 -19   41.92   16.86
  -4   2 -19   39.19   18.19
   4  -2  19    9.86   13.49
  -4   2 -20    8.62   12.38
  -4   2 -20   14.00   15.97
   4  -2  20    9.73   13.75
  -4   2 -21   -0.85   12.38
   4  -1 -19    7.68   15.37
   4  -1 -18    4.14   13.41
   4  -1 -17   -2.43   10.25
   4  -1 -16   -7.94   10.33
   4  -1 -15    1.11   11.19
   4  -1 -14    6.57   10.97
   4  -1 -14    7.04    8.92
  -4   1  13    5.51    8.11
   4  -1 -13    5.42    8.20
   4  -1 -13   12.47    8.71
  -4   1  12   63.44   14.69
   4  -1 -12   39.70   14.34
   4  -1 -12   39.06   11.31
  -4   1  11    8.58    7.30
   4  -1 -11    6.23    8.62
   4  -1 -11   -6.49    5.76
  -4   1  10   25.62   10.25
   4  -1 -10   30.91   10.72
   4  -1 -10   24.97    8.50
  -4   1   9  119.41   17.25
   4  -1  -9   99.34   17.03
   4  -1  -9  127.35   13.87
  -4   1   8  224.94   19.25
   4  -1  -8  248.34   21.05
   4  -1  -8  209.79   16.39
  -4   1   7   63.27   12.47
   4  -1  -7   47.60   11.83
   4  -1  -7   47.30    9.26
  -4   1   6  199.50   16.78
   4  -1  -6  168.59   16.61
   4  -1  -6  171.02   13.15
  -4   1   5  673.08   28.90
   4  -1  -5  581.89   27.24
   4  -1  -5  715.90   24.29
  -4   1   4  536.47   25.23
   4  -1  -4  424.57   22.63
   4  -1  -4  462.91   19.13
  -4   1   3 1815.05   44.27
   4  -1  -3 1879.90   44.83
   4  -1  -3 1620.85   33.47
  -4   1   2 1715.28   41.67
   4  -1  -2 1622.47   40.51
   4  -1  -2 1758.10   34.03
  -4   1   1  291.29   17.76
   4  -1  -1  241.38   16.09
   4  -1  -1  289.88   14.47
  -4   1   0  198.95   14.26
   4  -1   0  179.73   14.34
   4  -1   0  209.40   12.72
  -4   1  -1   45.42    8.41
   4  -1   1   56.01    9.99
   4  -1   1   46.28    7.68
  -4   1  -2  118.56   11.01
   4  -1   2  107.16   10.25
  -4   1  -3  157.70   11.87
   4  -1   3  160.10   13.19
  -4   1  -4   30.82    6.70
   4  -1   4   22.67    6.87
  -4   1  -5    5.04    3.80
  -4   1  -5   14.05    6.23
   4  -1   5   15.50    6.36
  -4   1  -6    0.81    3.24
  -4   1  -6    2.43    5.08
   4  -1   6   -4.10    3.93
  -4   1  -7    4.01    3.07
  -4   1  -7    7.13    5.59
  -4   1  -7    1.54    5.46
   4  -1   7   -0.73    4.78
  -4   1  -8   33.04    5.38
  -4   1  -8   39.40   10.33
  -4   1  -8   31.46    9.65
   4  -1   8   36.42    5.68
   4  -1   8   34.54    9.95
  -4   1  -9   25.79    9.31
  -4   1  -9   21.64    9.65
   4  -1   9   20.24    4.06
   4  -1   9   29.46   10.16
  -4   1 -10    4.35    6.57
  -4   1 -10    6.96    7.98
   4  -1  10    2.22    6.66
  -4   1 -11   73.30   14.34
  -4   1 -11   62.03   15.20
   4  -1  11   59.64   14.43
  -4   1 -12   25.96   10.80
  -4   1 -12   42.44   13.45
   4  -1  12   25.66   10.37
  -4   1 -13   -2.01    6.66
  -4   1 -13    9.43    9.82
  -4   1 -14   59.38   15.20
  -4   1 -14   46.41   15.20
   4  -1  14   38.89   13.15
  -4   1 -15  207.95   23.57
  -4   1 -15  205.43   30.14
   4  -1  15  154.84   26.43
  -4   1 -16   16.48   11.10
  -4   1 -16   -1.49   11.48
   4  -1  16    0.98    9.69
  -4   1 -17   97.12   20.24
  -4   1 -17  102.16   24.59
   4  -1  17  103.31   22.97
  -4   1 -18   23.52   13.70
  -4   1 -18   33.21   16.65
   4  -1  18   23.48   12.76
  -4   1 -19    2.43   10.16
  -4   1 -19   -3.97   11.53
   4  -1  19   16.44   14.17
  -4   1 -20   13.75   13.06
  -4   1 -20   30.27   19.30
   4  -1  20   14.86   15.63
  -4   1 -21   -5.81   23.01
   4  -1  21   -8.54   13.28
   4   0 -20   12.00   19.08
   4   0 -19   -3.33   11.40
   4   0 -18   -5.42   10.54
   4   0 -17   19.30   13.79
   4   0 -16   21.47   14.13
   4   0 -15    6.10   10.33
   4   0 -14    4.61   10.89
  -4   0  13   25.53   10.50
   4   0 -13   40.77   15.20
   4   0 -13   21.90    9.39
  -4   0  12    9.26    7.90
   4   0 -12   15.20   12.00
   4   0 -12    3.46    6.92
  -4   0  11  257.90   21.18
   4   0 -11  307.13   21.86
  -4   0  10    0.90    6.36
   4   0 -10   -0.26    7.43
   4   0 -10    4.57    5.59
  -4   0   9    6.19    5.85
   4   0  -9   -0.09    5.98
   4   0  -9   -2.77    4.23
  -4   0   8   67.62   12.51
   4   0  -8   66.26   14.43
   4   0  -8   79.11   11.44
  -4   0   7  456.85   24.33
   4   0  -7  419.58   25.19
   4   0  -7  427.48   19.77
  -4   0   6    6.66    5.38
   4   0  -6    5.25    5.76
   4   0  -6   10.84    4.91
  -4   0   5  204.79   16.56
   4   0  -5  225.63   17.97
   4   0  -5  190.96   12.00
  -4   0   4  114.24   12.85
   4   0  -4  119.67   13.66
   4   0  -4  114.67    9.35
  -4   0   3  598.80   25.19
   4   0  -3  592.95   25.44
   4   0  -3  515.21   16.74
  -4   0   2   36.37    8.62
   4   0  -2   42.39    9.26
   4   0  -2   39.79    6.02
  -4   0   1 1704.78   39.11
   4   0  -1 1738.85   39.32
   4   0  -1 1638.99   27.96
  -4   0   0  231.90   14.94
   4   0   0  189.34   13.62
   4   0   0  207.10   10.84
  -4   0  -1    5.72    4.87
   4   0   1    1.28    4.35
   4   0   1    5.34    3.37
  -4   0  -2   13.87    5.51
   4   0   2    9.35    5.34
   4   0   2   10.59    4.27
  -4   0  -3  203.09   12.64
  -4   0  -3  195.27   13.19
   4   0   3  183.15   12.30
  -4   0  -4    4.99    4.18
  -4   0  -4    3.20    4.40
   4   0   4   -1.45    4.40
  -4   0  -5  381.50   15.84
  -4   0  -5  381.28   19.81
   4   0   5  360.96   19.21
  -4   0  -6  580.23   18.78
  -4   0  -6  662.97   27.15
   4   0   6  599.82   19.00
  -4   0  -7   65.45    7.09
  -4   0  -7   78.38   13.28
   4   0   7   90.59    8.07
  -4   0  -8   11.01    6.23
  -4   0  -8    7.00    6.28
   4   0   8    8.71    3.63
  -4   0  -9  205.18   16.91
  -4   0  -9  247.61   20.62
   4   0   9  205.05   10.29
  -4   0 -10   12.47    6.79
  -4   0 -10   10.63    7.94
   4   0  10    9.61    3.46
  -4   0 -11    3.59    5.72
  -4   0 -11    4.99    6.92
  -4   0 -12    1.54    6.32
  -4   0 -12    0.51    6.70
  -4   0 -13   73.47   14.94
  -4   0 -13  102.12   20.11
  -4   0 -14   79.49   17.08
  -4   0 -14   62.76   16.99
  -4   0 -15   20.15   10.37
  -4   0 -15   19.81   12.76
  -4   0 -16  316.52   28.26
  -4   0 -16  372.53   34.67
  -4   0 -17    6.53    9.35
  -4   0 -17    3.80   12.25
  -4   0 -18   45.77   15.58
  -4   0 -18   15.41   13.70
  -4   0 -19   -0.47   10.54
  -4   0 -19    0.60   11.40
  -4   0 -20    7.39   14.81
  -4   0 -21    8.45   15.97
   4   0  21    0.26   14.05
   4   1 -19   -7.30   13.87
   4   1 -18    8.07   14.56
   4   1 -17   -7.43   10.12
   4   1 -16   -2.43   11.06
   4   1 -15   -0.38   10.97
   4   1 -14   13.32   11.91
   4   1 -13    3.50    9.09
  -4  -1  12   14.94    8.58
   4   1 -12   22.03   13.23
   4   1 -12   15.24    8.58
  -4  -1  11   29.07    9.43
   4   1 -11   19.98   10.97
   4   1 -11   17.42    7.98
  -4  -1  10    6.36    6.23
   4   1 -10   -1.15    6.87
   4   1 -10    6.57    6.06
  -4  -1   9  211.11   17.85
   4   1  -9  236.73   22.16
   4   1  -9  207.70   15.75
  -4  -1   8  288.21   19.81
   4   1  -8  319.00   24.25
   4   1  -8  309.47   17.46
  -4  -1   7    4.18    4.82
   4   1  -7   12.34    7.09
   4   1  -7   13.28    5.21
  -4  -1   6   85.38   13.32
   4   1  -6   69.37   13.53
   4   1  -6   65.75    7.94
  -4  -1   5  478.66   23.14
   4   1  -5  507.91   25.87
   4   1  -5  413.81   15.28
  -4  -1   4  365.40   19.68
   4   1  -4  340.85   20.28
   4   1  -4  355.11   12.85
  -4  -1   3  219.14   15.24
   4   1  -3  183.70   15.07
   4   1  -3  183.62    8.67
  -4  -1   2 2350.93   45.98
   4   1  -2 2617.28   49.14
   4   1  -2 2127.30   25.40
  -4  -1   1 2938.88   49.82
   4   1  -1 2835.69   48.75
   4   1  -1 2780.41   28.73
  -4  -1   0 1916.96   39.49
   4   1   0 1713.49   36.67
   4   1   0 1721.90   24.29
  -4  -1  -1  930.90   26.98
   4   1   1 1035.62   27.79
   4   1   1  927.53   19.89
  -4  -1  -2   14.30    5.93
  -4  -1  -2   16.65    4.70
   4   1   2   13.41    5.42
   4   1   2   14.86    4.44
  -4  -1  -3  412.75   17.67
  -4  -1  -3  452.96   17.55
   4   1   3  403.10   17.20
   4   1   3  411.12   16.44
  -4  -1  -4   41.20    7.60
  -4  -1  -4   49.39    8.24
  -4  -1  -5   12.00    4.82
  -4  -1  -5   10.84    5.59
   4   1   5    9.86    4.53
  -4  -1  -6  281.77   13.96
  -4  -1  -6  344.31   19.64
   4   1   6  293.12   14.22
  -4  -1  -7   18.40    7.39
   4   1   7   17.25    5.04
  -4  -1  -8  330.56   18.40
  -4  -1  -8  334.45   21.39
   4   1   8  346.23   14.73
  -4  -1  -9    4.06    4.95
  -4  -1  -9    4.14    5.72
   4   1   9    3.42    3.37
  -4  -1 -10   49.91   10.76
  -4  -1 -10   52.08   12.17
   4   1  10   41.62    6.49
  -4  -1 -11    5.64    5.81
  -4  -1 -11    0.90    5.76
   4   1  11    0.68    3.07
  -4  -1 -12   46.71   11.19
  -4  -1 -12   31.04   11.31
  -4  -1 -13   44.78   11.91
  -4  -1 -13   32.23   12.30
  -4  -1 -14    9.26    7.56
  -4  -1 -14   13.06   10.42
  -4  -1 -15  406.60   28.56
  -4  -1 -15  480.16   35.48
  -4  -1 -16    5.93    8.11
  -4  -1 -16    5.08    9.82
  -4  -1 -17  102.29   19.38
  -4  -1 -17   96.53   22.16
  -4  -1 -18   41.03   14.00
  -4  -1 -18   50.72   18.06
  -4  -1 -19   -1.71   11.40
  -4  -1 -20   -4.74   11.19
  -4  -1 -21    5.42   15.03
   4   2 -19    7.77   13.92
   4   2 -18    4.31   13.96
   4   2 -17   33.90   17.50
   4   2 -16    3.88    9.31
   4   2 -15   -7.47    9.39
   4   2 -14   34.37   15.50
   4   2 -13    2.01    9.05
   4   2 -12    0.00    8.32
  -4  -2  11    7.26    6.45
   4   2 -11    6.06    8.28
   4   2 -11    4.61    5.98
  -4  -2  10  100.20   14.86
   4   2 -10   98.58   18.83
   4   2 -10   83.42   12.94
  -4  -2   9  156.08   15.16
   4   2  -9  180.03   20.45
   4   2  -9  194.42   14.90
  -4  -2   8  100.92   12.38
   4   2  -8   85.77   15.84
   4   2  -8   93.37   10.42
  -4  -2   7 1095.01   35.18
   4   2  -7  978.37   39.23
   4   2  -7 1015.30   26.85
  -4  -2   6   47.09    9.18
   4   2  -6   53.32   12.08
   4   2  -6   43.20    6.79
  -4  -2   5  312.25   18.74
   4   2  -5  329.20   21.18
   4   2  -5  335.73   12.59
  -4  -2   4 1116.01   33.00
   4   2  -4 1161.95   36.50
   4   2  -4 1268.98   20.11
  -4  -2   3   18.91    6.53
  -4  -2   3   20.96    3.07
   4   2  -3   14.64    6.40
   4   2  -3   25.27    3.20
  -4  -2   2 1487.09   36.46
   4   2  -2 1478.21   37.18
  -4  -2   1  237.07   15.07
   4   2  -1  204.32   13.96
  -4  -2   0 1135.27   30.52
   4   2   0 1080.45   28.48
   4   2   0 1028.07   14.17
   4   2   0 1167.67   15.28
  -4  -2  -1  272.46   15.41
  -4  -2  -1  308.11   10.42
   4   2   1  291.63   14.86
   4   2   1  267.64    9.61
  -4  -2  -2  897.73   26.51
  -4  -2  -2  974.23   20.83
   4   2   2  922.23   24.08
  -4  -2  -3  162.02   12.25
  -4  -2  -3  174.01   10.97
   4   2   3  148.61   11.27
   4   2   3  165.94   10.54
  -4  -2  -4   28.77    6.83
  -4  -2  -4   28.52    6.32
   4   2   4   30.95    6.70
   4   2   4   37.36    6.66
  -4  -2  -5  227.12   14.47
   4   2   5  204.54   12.85
  -4  -2  -6  662.28   25.79
   4   2   6  656.86   21.73
  -4  -2  -7   18.91    7.00
   4   2   7   26.13    6.32
  -4  -2  -8  123.12   13.83
   4   2   8  111.77    9.90
  -4  -2  -9    9.95    5.21
  -4  -2  -9   13.28    7.30
   4   2   9    8.84    4.48
  -4  -2 -10  632.10   25.27
  -4  -2 -10  605.63   30.95
   4   2  10  581.94   20.45
  -4  -2 -11   16.52    6.87
  -4  -2 -11   14.43    8.97
   4   2  11   17.42    5.38
  -4  -2 -12  363.27   21.90
  -4  -2 -12  397.93   28.18
   4   2  12  357.97   16.22
  -4  -2 -13   38.38   10.80
  -4  -2 -13   52.43   14.09
  -4  -2 -14  114.80   17.25
  -4  -2 -14  117.15   20.58
  -4  -2 -15   -4.18    5.34
  -4  -2 -15   -1.96    7.30
  -4  -2 -16   77.19   15.67
  -4  -2 -16   91.79   21.77
  -4  -2 -17   55.67   14.43
  -4  -2 -17   29.54   14.64
  -4  -2 -18   -2.35   11.65
  -4  -2 -19   58.02   19.72
  -4  -2 -20   -0.21   11.48
  -4  -2 -21    2.43   13.49
   4   3 -18   -2.09   11.61
   4   3 -17   -9.82   10.03
   4   3 -16   39.96   18.10
   4   3 -15   -4.23    8.54
   4   3 -14  -10.12    8.11
   4   3 -13    2.56    9.95
   4   3 -12   53.54   15.88
  -4  -3  11    1.24    6.23
   4   3 -11    8.45    9.78
  -4  -3  10   16.86    7.51
   4   3 -10   21.22   11.23
   4   3 -10   18.36    7.09
  -4  -3   9   44.70   10.03
   4   3  -9   49.57   14.09
   4   3  -9   55.76    9.82
  -4  -3   8  358.31   20.92
   4   3  -8  394.18   27.15
   4   3  -8  356.56   17.67
  -4  -3   7  177.13   15.41
   4   3  -7  156.38   18.02
   4   3  -7  148.10   11.06
  -4  -3   6  145.88   13.75
   4   3  -6  151.68   16.39
   4   3  -6  150.79    9.86
  -4  -3   5  401.56   20.79
   4   3  -5  446.39   25.19
   4   3  -5  445.19   13.70
  -4  -3   4  118.34   11.74
  -4  -3   4  152.33    7.13
  -4  -3   4  135.12    7.00
   4   3  -4  134.35   13.96
   4   3  -4  126.11    6.45
  -4  -3   3  191.64   14.64
   4   3  -3  207.31   16.27
  -4  -3   2    8.88    5.59
   4   3  -2    0.21    4.82
  -4  -3   1  852.65   27.71
   4   3  -1  898.75   27.62
  -4  -3   0  446.30   20.02
  -4  -3   0  513.76    8.24
   4   3   0  423.76   19.51
   4   3   0  414.16   17.93
   4   3   0  457.57    7.56
  -4  -3  -1  489.34   20.62
  -4  -3  -1  539.67   12.47
   4   3   1  559.78   22.29
   4   3   1  502.61   18.31
   4   3   1  569.94   12.68
  -4  -3  -2 1785.77   38.29
  -4  -3  -2 1801.44   27.19
   4   3   2 1844.94   38.81
   4   3   2 1849.59   32.45
  -4  -3  -3  211.71   13.96
  -4  -3  -3  241.64   12.04
   4   3   3  224.39   14.26
   4   3   3  219.82   11.31
  -4  -3  -4  191.22   12.21
   4   3   4  201.17   13.70
   4   3   4  211.54   10.76
  -4  -3  -5   14.56    5.81
   4   3   5   17.46    5.76
   4   3   5   21.86    4.91
  -4  -3  -6  452.88   21.56
   4   3   6  437.64   18.91
  -4  -3  -7  459.54   22.88
   4   3   7  434.82   19.13
  -4  -3  -8    1.45    5.68
   4   3   8   -1.66    3.33
  -4  -3  -9  196.55   12.59
  -4  -3  -9  179.22   17.46
   4   3   9  180.29   13.15
  -4  -3 -10    3.67    4.06
  -4  -3 -10    0.30    6.28
   4   3  10   -1.49    3.20
  -4  -3 -11  483.40   21.73
  -4  -3 -11  575.40   31.72
   4   3  11  544.28   22.24
  -4  -3 -12   41.58    9.35
  -4  -3 -12   36.42   12.85
   4   3  12   34.50    7.51
  -4  -3 -13   88.07   13.70
  -4  -3 -13   95.89   18.10
   4   3  13   83.55   10.12
  -4  -3 -14    0.34    5.34
  -4  -3 -14    8.67    9.52
  -4  -3 -15  124.83   15.24
  -4  -3 -15  135.85   23.52
  -4  -3 -16   37.74   12.89
  -4  -3 -16   74.03   19.64
  -4  -3 -17   10.97   10.97
  -4  -3 -18  111.34   24.04
  -4  -3 -19   29.97   15.88
  -4  -3 -20    4.27   13.02
  -4  -3 -21   13.28   14.98
   4   4 -18   11.70   14.30
   4   4 -17    7.39   13.11
   4   4 -16   -6.96    9.82
   4   4 -15   -0.47    9.22
   4   4 -14    0.81    8.62
   4   4 -13    3.33    8.67
   4   4 -12   16.56   11.83
   4   4 -11   -3.93    8.45
  -4  -4  10   -5.17    4.65
  -4  -4  10   -0.85    4.61
   4   4 -10   -1.11    5.08
   4   4 -10    0.94    7.98
   4   4 -10   -5.29    7.17
  -4  -4   9   22.54    7.86
  -4  -4   9   29.16    7.73
   4   4  -9   19.17    7.86
   4   4  -9   21.94   11.06
   4   4  -9   13.06    6.28
  -4  -4   8  150.75   14.86
  -4  -4   8  135.72   12.04
   4   4  -8  189.42   16.09
   4   4  -8  158.26   19.42
   4   4  -8  154.89   12.64
  -4  -4   7  467.65   23.18
  -4  -4   7  558.41   20.32
   4   4  -7  488.74   23.86
   4   4  -7  493.52   29.59
   4   4  -7  519.01   19.51
  -4  -4   6 1000.62   32.96
  -4  -4   6  869.25   22.71
   4   4  -6 1046.38   33.68
   4   4  -6 1072.25   41.03
   4   4  -6 1053.51   24.55
  -4  -4   5  120.86   12.64
  -4  -4   5  138.66    8.71
   4   4  -5  117.70   12.64
   4   4  -5  120.22   15.03
  -4  -4   4 1005.78   31.93
  -4  -4   4 1130.91   19.42
   4   4  -4 1021.15   32.23
   4   4  -4 1201.23   39.11
  -4  -4   3    5.51    4.70
  -4  -4   3    2.73    2.05
  -4  -4   3    4.70    2.01
   4   4  -3    4.99    4.78
   4   4  -3    4.53    5.42
  -4  -4   2   51.96    9.31
   4   4  -2   39.92    8.41
   4   4  -2   41.11    8.71
  -4  -4   1  499.41   22.24
   4   4  -1  563.96   23.61
   4   4  -1  518.32   21.90
   4   4  -1  352.85    7.04
  -4  -4   0   82.27   10.29
  -4  -4   0   85.94    4.99
   4   4   0   65.40   10.33
   4   4   0   80.99    9.56
   4   4   0   85.77    5.04
  -4  -4  -1 1536.83   22.54
   4   4   1 1768.86   40.56
   4   4   1 1708.03   33.39
  -4  -4  -2   26.85    4.99
   4   4   2   26.98    7.34
   4   4   2   25.57    5.51
  -4  -4  -3   92.39    8.28
   4   4   3  103.19   10.97
   4   4   3  101.86    7.73
  -4  -4  -4  329.97   15.84
   4   4   4  332.36   18.23
   4   4   4  318.65   11.83
  -4  -4  -5   30.18    7.21
   4   4   5   30.06    7.34
   4   4   5   30.65    4.78
  -4  -4  -6  579.89   23.99
   4   4   6  576.47   23.57
   4   4   6  599.35   14.86
  -4  -4  -7   22.54    7.68
   4   4   7   18.83    6.23
  -4  -4  -8   80.99   12.76
   4   4   8   92.17   10.72
  -4  -4  -9   27.54    9.35
   4   4   9   28.52    7.68
  -4  -4 -10  159.71   17.76
   4   4  10  164.19   14.09
  -4  -4 -11  275.58   14.98
  -4  -4 -11  281.04   23.05
   4   4  11  275.15   17.85
  -4  -4 -12  128.38   11.78
  -4  -4 -12  166.54   19.34
   4   4  12  124.40   12.72
  -4  -4 -13  133.63   12.81
  -4  -4 -13  158.13   24.04
   4   4  13  138.32   13.66
  -4  -4 -14    3.16    4.91
  -4  -4 -14    7.21   10.63
  -4  -4 -15   70.31   17.38
  -4  -4 -16   30.06   13.53
  -4  -4 -17  169.74   29.41
  -4  -4 -18  -10.97    9.73
  -4  -4 -19   -1.20   10.97
  -4  -4 -20   -4.61   12.08
  -4  -4 -21   30.23   17.42
   4   5 -17    4.57   11.83
   4   5 -16    8.07   13.53
   4   5 -15    9.99   11.48
   4   5 -14   21.05   14.56
   4   5 -13   26.85   14.26
   4   5 -12   -0.09    8.32
   4   5 -11   22.11   12.51
  -4  -5  10   35.82   14.77
   4   5 -10   30.99    9.09
   4   5 -10   39.28   13.66
  -4  -5   9  110.40   13.15
  -4  -5   9  110.23   12.55
   4   5  -9  143.02   14.86
   4   5  -9  125.51   21.35
  -4  -5   8   -4.40    4.61
  -4  -5   8   -0.64    4.23
   4   5  -8   -1.41    4.70
   4   5  -8    5.85    8.28
  -4  -5   7  648.32   27.62
  -4  -5   7  662.75   23.10
   4   5  -7  593.16   26.60
   4   5  -7  705.61   36.54
  -4  -5   6    4.18    5.21
  -4  -5   6    2.99    3.88
   4   5  -6    4.57    6.10
   4   5  -6    8.32    7.26
  -4  -5   5  822.04   30.06
  -4  -5   5  636.84   19.00
   4   5  -5  817.55   30.10
   4   5  -5  721.92   33.00
  -4  -5   4   98.79   12.08
  -4  -5   4  118.43    8.28
   4   5  -4  111.64   12.72
   4   5  -4  119.32   14.86
  -4  -5   3   65.83    6.40
   4   5  -3   54.01   10.08
   4   5  -3   66.30   12.47
  -4  -5   2  444.60   12.25
   4   5  -2  489.25   23.05
   4   5  -2  467.69   23.05
  -4  -5   1   57.93    6.45
   4   5  -1   64.00   10.59
   4   5  -1   71.08   11.36
  -4  -5   0  110.70    7.39
   4   5   0  129.06   12.68
   4   5   0  124.58   11.31
  -4  -5  -1  121.16    8.11
   4   5   1  161.03   14.26
   4   5   1  125.43   10.63
  -4  -5  -2  120.69    9.14
   4   5   2  149.38   13.49
   4   5   2  126.54    9.43
  -4  -5  -3   83.25    8.75
   4   5   3   84.66   12.12
   4   5   3   93.03    7.47
  -4  -5  -4  293.17   15.84
   4   5   4  302.94   18.36
   4   5   4  278.78   10.46
  -4  -5  -5    2.86    4.48
   4   5   5   -1.15    3.88
   4   5   5    1.58    2.22
  -4  -5  -6  559.95   24.42
   4   5   6  563.75   25.10
   4   5   6  486.13   10.12
   4   5   6  527.38   10.67
  -4  -5  -7   29.59    8.67
   4   5   7   35.78    9.09
   4   5   7   34.79    3.46
   4   5   7   37.48    3.50
  -4  -5  -8   56.01   11.74
   4   5   8   64.68   11.40
   4   5   8   65.40    4.82
   4   5   8   59.77    4.61
  -4  -5  -9    2.35    5.72
   4   5   9    6.79    5.64
  -4  -5 -10   92.68   15.80
   4   5  10  102.20   14.17
  -4  -5 -11   35.26   11.95
   4   5  11   27.49    8.45
  -4  -5 -12  110.06    9.73
  -4  -5 -12  107.71   18.96
   4   5  12  117.28   13.96
  -4  -5 -13   -0.30    5.93
   4   5  13    2.39    5.93
  -4  -5 -14   74.33   17.89
   4   5  14   80.65   14.26
  -4  -5 -15   -7.21    6.75
  -4  -5 -16  177.86   29.54
  -4  -5 -17   -3.12    9.09
  -4  -5 -18   57.21   19.34
  -4  -5 -19   -4.14   12.34
  -4  -5 -20   47.47   19.55
  -4  -5 -21   -2.22   11.78
   4   6 -17   -6.40   13.23
   4   6 -16   -4.87    9.48
   4   6 -15   13.19   14.13
   4   6 -14    2.01   12.21
   4   6 -13   11.57   13.62
   4   6 -12    9.69   11.91
   4   6 -11   13.58   10.97
   4   6 -10   -1.20    7.56
  -4  -6   9    4.10    5.64
   4   6  -9    3.67    5.55
   4   6  -9    4.14    7.51
  -4  -6   8   65.58   10.76
   4   6  -8   71.98   12.42
   4   6  -8   66.90   16.31
  -4  -6   7   -3.63    3.54
   4   6  -7    4.14    5.21
   4   6  -7    1.49    7.39
  -4  -6   6  275.92   15.50
   4   6  -6  261.66   18.57
   4   6  -6  272.08   23.57
  -4  -6   5  619.42   20.79
   4   6  -5  612.08   26.98
   4   6  -5  651.44   32.57
  -4  -6   4    2.18    3.42
   4   6  -4    1.32    5.21
   4   6  -4    7.73    7.00
  -4  -6   3 1415.54   27.49
   4   6  -3 1599.37   42.44
   4   6  -3 1390.23   42.31
  -4  -6   2    2.60    3.24
   4   6  -2    2.73    5.68
   4   6  -2    4.91    5.59
  -4  -6   1 1236.58   25.10
   4   6  -1 1435.73   39.87
   4   6  -1 1421.26   38.08
  -4  -6   0   60.75    7.09
   4   6   0  103.49   14.47
   4   6   0  101.95   10.97
  -4  -6  -1    7.77    3.93
   4   6   1    2.31    5.21
   4   6   1   10.29    5.21
  -4  -6  -2  318.40   15.24
   4   6   2  340.60   20.45
   4   6   2  348.07   15.45
  -4  -6  -3  244.67   14.39
   4   6   3  216.92   17.25
   4   6   3  261.53   12.17
  -4  -6  -4  348.79   17.93
   4   6   4  374.79   21.52
   4   6   4  362.20   12.00
  -4  -6  -5  574.04   24.25
   4   6   5  622.19   27.54
   4   6   5  637.39   12.08
  -4  -6  -6   37.83    9.14
   4   6   6   22.80    7.90
  -4  -6  -7   17.08    6.83
   4   6   7    9.18    6.87
  -4  -6  -8  220.33   18.70
   4   6   8  240.48   18.74
  -4  -6  -9   63.27   12.94
   4   6   9   57.42   11.95
  -4  -6 -10   55.20   12.81
   4   6  10   37.70   10.03
  -4  -6 -11  176.36   19.47
   4   6  11  176.70   17.16
  -4  -6 -12    5.64    8.20
   4   6  12    0.77    6.02
  -4  -6 -13   78.94   17.08
   4   6  13   58.02   12.85
  -4  -6 -14  117.79   22.24
   4   6  14  108.65   17.33
  -4  -6 -15   29.37   13.92
   4   6  15   11.57    8.71
  -4  -6 -16   46.45   17.80
  -4  -6 -17   -3.71   11.44
  -4  -6 -18   42.14   19.04
  -4  -6 -19   -0.38   13.28
  -4  -6 -20   -4.87   14.13
  -4  -6 -21    9.78   16.52
   4   7 -16   -4.82   11.70
   4   7 -15    7.60   13.49
   4   7 -14   -2.52   11.31
   4   7 -13    3.50   10.67
   4   7 -12    8.32   10.37
   4   7 -11   24.59   14.00
   4   7 -10    8.54   11.78
   4   7  -9   84.49   20.41
  -4  -7   8    0.00    4.95
   4   7  -8    4.74    5.93
   4   7  -8    4.48    8.15
  -4  -7   7   47.73    9.52
   4   7  -7   44.74   10.46
   4   7  -7   28.13   11.70
  -4  -7   6  150.45   13.06
   4   7  -6  132.73   14.34
   4   7  -6  142.04   20.88
  -4  -7   5   83.21   10.20
   4   7  -5   79.96   13.19
   4   7  -5   81.33   15.88
  -4  -7   4  708.05   23.69
   4   7  -4  874.55   33.39
   4   7  -4  668.05   33.09
  -4  -7   3  350.46   16.52
   4   7  -3  303.28   20.53
   4   7  -3  356.91   23.48
  -4  -7   2  400.88   17.25
   4   7  -2  391.40   22.88
   4   7  -2  457.74   24.76
  -4  -7   1   -1.02    3.33
   4   7  -1    1.84    4.95
   4   7  -1    0.04    4.53
  -4  -7   0   92.47    9.35
   4   7   0  115.99   14.00
   4   7   0  120.43   12.17
  -4  -7  -1    6.06    4.61
   4   7   1   12.25    6.79
   4   7   1   10.46    5.51
  -4  -7  -2  259.82   15.54
   4   7   2  287.36   19.98
   4   7   2  272.12   14.47
  -4  -7  -3  178.75   13.87
   4   7   3  231.90   18.31
   4   7   3  187.67   11.19
  -4  -7  -4   10.63    5.64
   4   7   4   14.60    7.43
   4   7   4   19.89    4.48
  -4  -7  -5   59.00    4.57
  -4  -7  -5   52.85   10.37
   4   7   5   60.88   12.89
   4   7   5   59.98    4.65
  -4  -7  -6  120.52   13.75
   4   7   6  148.70   16.18
  -4  -7  -7  224.26   18.61
   4   7   7  224.22   18.83
  -4  -7  -8    3.93    6.28
   4   7   8    3.20    6.32
  -4  -7  -9  196.38   19.55
   4   7   9  200.48   19.13
  -4  -7 -10  271.65   22.84
   4   7  10  280.74   22.07
  -4  -7 -11   18.36   10.20
   4   7  11   13.83    7.94
  -4  -7 -12  238.01   24.33
   4   7  12  207.31   20.41
  -4  -7 -13   49.65   15.37
   4   7  13   46.41   13.06
  -4  -7 -14   -0.47    7.04
   4   7  14    0.85    7.13
  -4  -7 -15   72.79   19.51
   4   7  15   83.51   17.12
  -4  -7 -16    6.23   10.72
  -4  -7 -17   62.59   20.41
  -4  -7 -18    6.75   13.23
  -4  -7 -19   15.41   15.58
  -4  -7 -20   28.26   17.33
  -4  -7 -21   10.76   15.37
   4   8 -15   11.23   14.39
   4   8 -14    2.60   11.48
   4   8 -13    3.88   12.17
   4   8 -12   27.24   14.69
   4   8 -11    1.75   10.37
   4   8 -10   15.24   12.98
   4   8  -9   17.20   12.47
   4   8  -8   31.55   10.42
   4   8  -8   40.22   15.16
  -4  -8   7   24.80    8.58
   4   8  -7   37.74   10.29
   4   8  -7   25.44   12.04
  -4  -8   6    7.09    5.81
   4   8  -6   20.88    8.11
   4   8  -6   12.59    9.52
  -4  -8   5  451.43   22.20
   4   8  -5  529.13   27.37
   4   8  -5  494.72   31.81
  -4  -8   4  420.77   20.88
   4   8  -4  521.19   27.54
   4   8  -4  385.59   26.51
  -4  -8   3  559.05   23.05
   4   8  -3  597.77   29.20
   4   8  -3  541.85   29.88
  -4  -8   2   93.03   12.17
   4   8  -2  100.24   15.20
   4   8  -2   90.55   14.90
  -4  -8   1    5.59    4.91
   4   8  -1   -0.09    5.98
   4   8  -1    3.54    5.64
  -4  -8   0   19.17    6.53
   4   8   0   31.81    9.48
   4   8   0   36.07    8.88
  -4  -8  -1    9.26    5.55
   4   8   1   13.45    7.77
   4   8   1    4.78    4.70
  -4  -8  -2    8.92    5.38
   4   8   2    8.58    6.75
   4   8   2   14.60    5.38
  -4  -8  -3   44.23    9.31
   4   8   3   44.27   11.44
   4   8   3   48.58    7.73
  -4  -8  -4    0.21    4.27
   4   8   4    0.43    5.59
   4   8   4    2.77    2.90
  -4  -8  -5   42.61   10.12
   4   8   5   58.36   12.47
   4   8   5   47.43    4.91
  -4  -8  -6  276.43   20.41
   4   8   6  257.13   21.00
  -4  -8  -7   -0.09    4.61
   4   8   7    0.85    6.10
  -4  -8  -8  322.67   23.86
   4   8   8  340.17   24.85
  -4  -8  -9   23.10    9.35
   4   8   9    5.08    7.60
  -4  -8 -10   20.88    9.73
   4   8  10   26.13   10.29
  -4  -8 -11  191.60   22.16
   4   8  11  215.25   21.56
  -4  -8 -12   74.46   17.76
   4   8  12   73.30   15.84
  -4  -8 -13    3.20    7.68
   4   8  13    3.97    7.77
  -4  -8 -14  127.91   23.52
   4   8  14  133.84   21.73
  -4  -8 -15  191.13   29.97
   4   8  15  139.94   22.54
  -4  -8 -16   18.31   13.96
   4   8  16    4.10    9.31
  -4  -8 -17   60.84   19.85
  -4  -8 -18   16.22   13.87
  -4  -8 -19   18.96   16.09
  -4  -8 -20    5.21   13.06
  -4  -8 -21    7.77   17.67
   4   9 -14  -19.13    7.81
   4   9 -13   -0.55   10.97
   4   9 -12   10.29   12.17
   4   9 -11   -0.43    9.86
   4   9 -10   78.68   20.83
   4   9  -9   10.33   12.76
   4   9  -8   37.31   14.64
   4   9  -7   68.99   14.17
   4   9  -7   48.20   15.07
  -4  -9   6   71.47   12.94
   4   9  -6   75.99   14.39
   4   9  -6   71.34   16.74
  -4  -9   5   54.56   11.48
   4   9  -5   61.14   13.28
   4   9  -5   77.10   17.59
  -4  -9   4   44.66   10.20
   4   9  -4   54.39   12.94
   4   9  -4   51.91   14.09
  -4  -9   3  122.57   14.47
   4   9  -3  104.08   16.48
   4   9  -3  110.70   17.67
  -4  -9   2  248.89   17.67
   4   9  -2  226.48   20.15
   4   9  -2  227.55   19.68
  -4  -9   1  169.10   14.64
   4   9  -1  219.14   19.51
   4   9  -1  195.79   17.63
  -4  -9   0  649.56   27.15
   4   9   0  702.28   33.73
   4   9   0  636.71   28.52
  -4  -9  -1    7.47    5.76
   4   9   1    2.86    5.93
   4   9   1    3.59    4.99
  -4  -9  -2   -6.23    4.44
   4   9   2   -1.15    5.34
   4   9   2    0.04    4.01
  -4  -9  -3   66.00   12.47
   4   9   3   95.37   16.82
   4   9   3   94.78    9.82
  -4  -9  -4    1.45    5.17
   4   9   4   -6.87    5.34
   4   9   4    3.71    3.33
  -4  -9  -5   -4.70    4.78
   4   9   5    1.62    5.89
   4   9   5    3.97    3.07
  -4  -9  -6   12.55    7.34
   4   9   6   -2.09    5.64
  -4  -9  -7  340.13   24.51
   4   9   7  331.67   25.27
  -4  -9  -8    9.43    7.68
   4   9   8    6.87    7.39
  -4  -9  -9  205.56   21.60
   4   9   9  165.22   19.34
  -4  -9 -10   -2.82    6.49
   4   9  10    6.92    8.45
  -4  -9 -11   63.78   16.65
   4   9  11   61.22   16.48
  -4  -9 -12   46.92   14.73
   4   9  12   55.80   15.71
  -4  -9 -13   56.70   16.61
   4   9  13   65.23   17.08
  -4  -9 -14  181.78   28.77
   4   9  14  172.26   25.27
  -4  -9 -15   29.88   14.94
   4   9  15   40.94   14.69
  -4  -9 -16   50.72   18.78
   4   9  16   44.19   15.45
  -4  -9 -17    5.17   12.89
   4   9  17   -3.50    8.54
  -4  -9 -18   -2.39   13.06
  -4  -9 -19    4.18   12.89
  -4  -9 -20   -0.04   15.33
   4  10 -13   -7.68   11.48
   4  10 -12    5.17   13.06
   4  10 -11    3.07   11.91
   4  10 -10   29.50   16.09
   4  10  -9   23.74   13.32
   4  10  -8  153.01   26.21
   4  10  -7    4.70   10.67
   4  10  -6   22.03    9.48
   4  10  -6   17.93   11.14
  -4 -10   5   27.32   10.84
   4  10  -5   26.38    9.90
   4  10  -5   14.73   10.08
  -4 -10   4   59.64   12.38
   4  10  -4   66.56   14.22
   4  10  -4   82.10   17.72
  -4 -10   3    8.79    8.28
   4  10  -3   13.36    8.67
   4  10  -3    9.52    9.14
  -4 -10   2   69.80   13.11
   4  10  -2   91.19   16.61
   4  10  -2   59.43   14.22
  -4 -10   1  504.88   26.17
   4  10  -1  546.33   31.59
   4  10  -1  599.65   30.91
  -4 -10   0   66.09   13.28
   4  10   0   61.86   14.69
   4  10   0   74.75   13.58
  -4 -10  -1  159.11   16.52
   4  10   1  155.27   18.78
   4  10   1  178.88   15.84
  -4 -10  -2   -2.13    5.21
   4  10   2   -6.62    5.34
   4  10   2    0.09    4.48
  -4 -10  -3   54.48   12.30
   4  10   3   46.49   12.59
   4  10   3   58.74    9.61
  -4 -10  -4   14.30    8.45
   4  10   4    2.56    6.83
   4  10   4   16.52    5.51
  -4 -10  -5    4.65    7.17
   4  10   5   17.38    9.31
  -4 -10  -6    0.43    6.62
   4  10   6    8.41    8.58
  -4 -10  -7   40.51   12.34
   4  10   7   47.00   13.41
  -4 -10  -8   17.03    9.86
   4  10   8   13.83    9.05
  -4 -10  -9   10.37    8.97
   4  10   9   11.06    8.97
  -4 -10 -10    7.26    9.43
   4  10  10   17.59   10.67
  -4 -10 -11   58.40   16.74
   4  10  11   44.06   14.17
  -4 -10 -12    8.75    9.99
   4  10  12    5.72    8.58
  -4 -10 -13  162.49   28.13
   4  10  13  162.57   26.51
  -4 -10 -14  111.13   24.72
   4  10  14  110.74   22.50
  -4 -10 -15  159.97   29.76
   4  10  15  181.14   27.54
  -4 -10 -16    6.83   12.89
   4  10  16   -4.48   10.08
  -4 -10 -17   -4.01   10.89
   4  10  17    4.78   11.06
  -4 -10 -18   17.55   15.24
  -4 -10 -19    5.76   14.22
  -4 -10 -20   14.47   20.19
   4  11 -12   10.25   12.94
   4  11 -11   -8.11   11.27
   4  11 -10   25.19   15.84
   4  11  -9   86.71   22.58
   4  11  -8   19.55   13.02
   4  11  -7  139.18   26.17
   4  11  -6   -5.93    8.75
  -4 -11   5   31.38   17.25
   4  11  -5   38.98   12.68
   4  11  -5   22.63   11.87
  -4 -11   4   20.07    9.56
   4  11  -4   31.38   11.83
   4  11  -4   14.56   10.29
  -4 -11   3   39.96   13.41
   4  11  -3   39.23   12.98
   4  11  -3   42.69   13.92
  -4 -11   2  110.87   16.99
   4  11  -2  126.03   20.53
   4  11  -2  138.32   21.43
  -4 -11   1   18.87    9.35
   4  11  -1   24.16   11.14
   4  11  -1   24.80   10.37
  -4 -11   0  113.60   17.76
   4  11   0  165.43   23.99
   4  11   0  121.72   18.06
  -4 -11  -1   59.13   13.53
   4  11   1   88.03   17.50
   4  11   1   88.07   14.52
  -4 -11  -2   39.58   11.74
   4  11   2   51.19   14.09
   4  11   2   52.34   10.76
  -4 -11  -3   60.79   13.70
   4  11   3   57.59   15.33
   4  11   3   64.51   11.06
  -4 -11  -4   -3.03    5.72
   4  11   4   -2.90    7.30
  -4 -11  -5   13.49    8.67
   4  11   5    1.45    7.73
  -4 -11  -6  155.95   22.46
   4  11   6  167.22   20.75
  -4 -11  -7   32.87   12.76
   4  11   7   46.28   15.54
  -4 -11  -8   -0.85    7.09
   4  11   8    0.30    7.13
  -4 -11  -9    0.21    6.49
   4  11   9    1.32    9.18
  -4 -11 -10   78.21   17.59
   4  11  10   86.88   19.68
  -4 -11 -11   -1.37    8.71
   4  11  11   -9.05    8.62
  -4 -11 -12  129.66   24.63
   4  11  12  161.38   25.96
  -4 -11 -13   65.83   19.68
   4  11  13   49.65   16.44
  -4 -11 -14  110.44   24.55
   4  11  14  113.65   23.01
  -4 -11 -15   27.45   15.11
   4  11  15   10.20   13.06
  -4 -11 -16   14.56   13.53
   4  11  16    5.08    9.99
  -4 -11 -17    7.17   14.22
   4  11  17   14.43   13.36
  -4 -11 -18   -9.22   13.87
   4  11  18    0.34   12.17
  -4 -11 -19   10.20   16.74
   4  12 -11   -7.17   13.06
   4  12 -10    1.32   12.81
   4  12  -9   -3.29   10.97
   4  12  -8   26.30   15.75
   4  12  -7   32.83   16.44
   4  12  -6   53.37   17.85
   4  12  -5  157.96   22.75
   4  12  -5  166.24   27.41
  -4 -12   4   15.67   11.36
   4  12  -4   21.82   11.23
   4  12  -4   27.32   13.83
  -4 -12   3   78.72   15.88
   4  12  -3   77.53   17.42
   4  12  -3   85.64   18.49
  -4 -12   2   22.63   10.59
   4  12  -2   12.42   10.03
   4  12  -2   19.42   10.63
  -4 -12   1   46.62   13.06
   4  12  -1   40.60   13.06
   4  12  -1   51.91   14.30
  -4 -12   0   -5.42    7.39
   4  12   0   -6.23    7.09
   4  12   0    0.98    6.87
  -4 -12  -1   -3.20    8.62
   4  12   1   -0.51    7.13
   4  12   1   -0.98    6.36
  -4 -12  -2   59.94   14.69
   4  12   2   55.41   15.03
   4  12   2   92.94   15.07
  -4 -12  -3   89.65   17.46
   4  12   3  100.50   19.72
  -4 -12  -4   23.27   10.89
   4  12   4   38.51   13.62
  -4 -12  -5   11.31   10.12
   4  12   5   10.67    9.69
  -4 -12  -6   14.81   10.63
   4  12   6   26.68   12.68
  -4 -12  -7   -0.34    7.86
   4  12   7    2.13    7.94
  -4 -12  -8   15.88    9.99
   4  12   8    3.76    8.45
  -4 -12  -9   50.85   16.05
   4  12   9   27.07   13.75
  -4 -12 -10    3.59    8.84
   4  12  10    4.44    9.69
  -4 -12 -11   45.89   16.52
   4  12  11   17.42   11.91
  -4 -12 -12   -4.14    9.01
   4  12  12    6.23   10.59
  -4 -12 -13  136.40   27.58
   4  12  13   92.13   22.58
  -4 -12 -14   -7.73   10.50
   4  12  14   -3.03   11.44
  -4 -12 -15   14.09   13.53
   4  12  15    2.90   13.66
  -4 -12 -16   48.16   19.42
   4  12  16   40.47   18.10
  -4 -12 -17   -7.26   12.47
   4  12  17   -3.12   12.85
  -4 -12 -18    2.69   18.06
   4  12  18   34.32   17.08
   4  13 -10   -5.76   14.22
   4  13  -9    8.03   13.11
   4  13  -8   12.08   13.15
   4  13  -7    2.01   10.20
   4  13  -6  136.32   26.60
   4  13  -5    2.99   11.31
   4  13  -4  128.12   22.46
   4  13  -4  162.61   26.98
  -4 -13   3    5.51    9.56
   4  13  -3   -0.21    8.92
   4  13  -3    0.77    8.88
  -4 -13   2   28.01   12.55
   4  13  -2   36.29   14.00
   4  13  -2   40.05   14.22
  -4 -13   1    7.60    9.31
   4  13  -1   23.61   12.17
   4  13  -1    5.59    8.58
  -4 -13   0    3.20    8.84
   4  13   0    5.04    9.22
   4  13   0   -5.89    5.76
  -4 -13  -1   -2.09    7.43
   4  13   1   -4.23    8.11
  -4 -13  -2   17.59   11.23
   4  13   2   15.50   10.50
  -4 -13  -3    5.12    9.78
   4  13   3   16.48   12.76
  -4 -13  -4    2.05    7.64
   4  13   4   -5.38    7.56
  -4 -13  -5    6.23    8.62
   4  13   5    7.13    9.65
  -4 -13  -6   11.44   10.37
   4  13   6   11.10   10.29
  -4 -13  -7    8.28    9.01
   4  13   7   16.05   11.65
  -4 -13  -8   31.21   13.45
   4  13   8   50.76   17.03
  -4 -13  -9   -4.87    8.97
   4  13   9   -0.43   10.54
  -4 -13 -10  104.17   22.58
   4  13  10  100.16   22.33
  -4 -13 -11   -3.24   10.46
   4  13  11    1.45   11.65
  -4 -13 -12   21.09   12.98
   4  13  12   26.73   16.61
  -4 -13 -13    8.32   13.53
   4  13  13    4.31   12.25
  -4 -13 -14    5.42   14.60
   4  13  14    4.23   11.65
  -4 -13 -15   61.69   22.41
   4  13  15   69.16   23.01
  -4 -13 -16   12.12   16.01
   4  13  16   -4.53   11.70
  -4 -13 -17   38.81   20.75
   4  13  17   27.19   17.20
   4  13  18    3.24   12.25
   4  14  -9    1.92   13.53
   4  14  -8   -2.13   11.36
   4  14  -7   65.92   22.07
   4  14  -6    4.82   12.85
   4  14  -5   69.97   20.96
   4  14  -4   43.33   16.78
   4  14  -3    7.98   10.54
   4  14  -3    9.86   10.93
  -4 -14   2   19.08   16.48
   4  14  -2    8.62   12.00
   4  14  -2   22.58   12.81
  -4 -14   1    2.65   10.20
   4  14  -1    5.38   10.08
   4  14  -1   11.10   10.25
  -4 -14   0    4.31    9.56
   4  14   0    7.94   11.65
  -4 -14  -1    3.20    9.14
   4  14   1   -0.34    8.07
  -4 -14  -2    2.90    9.52
   4  14   2   -1.11    8.71
  -4 -14  -3   -7.00    7.39
   4  14   3   10.46   10.46
  -4 -14  -4   54.05   16.69
   4  14   4   55.24   17.85
  -4 -14  -5    8.37   10.29
   4  14   5    6.06   11.87
  -4 -14  -6   70.83   18.61
   4  14   6   70.23   19.17
  -4 -14  -7   35.09   14.56
   4  14   7   35.05   15.58
  -4 -14  -8   15.71   12.17
   4  14   8    1.45   10.72
  -4 -14  -9   64.29   19.64
   4  14   9   60.75   19.72
  -4 -14 -10   -2.48    9.82
   4  14  10   -8.67    8.88
  -4 -14 -11   13.41   13.83
   4  14  11   21.43   14.86
  -4 -14 -12   24.51   15.84
   4  14  12    0.98   10.97
  -4 -14 -13   -3.59   11.95
   4  14  13   -6.32   11.83
  -4 -14 -14   24.68   16.82
   4  14  14    3.29   15.71
  -4 -14 -15   -0.43   14.52
   4  14  15  -14.13   12.76
  -4 -14 -16   22.54   19.38
   4  14  16   18.06   15.80
   4  14  17   14.90   16.99
   4  15  -8   33.47   18.40
   4  15  -7    1.37   14.05
   4  15  -6    9.90   13.83
   4  15  -5   -9.69   10.25
   4  15  -4   -2.43   11.36
   4  15  -3   72.19   20.66
   4  15  -2    9.73   13.58
   4  15  -1   40.13   18.06
  -4 -15   0    5.85   10.80
   4  15   0   17.89   14.34
  -4 -15  -1    7.13   11.14
   4  15   1   10.50   14.00
  -4 -15  -2  -11.27    8.15
   4  15   2    0.90   11.74
  -4 -15  -3   36.63   15.11
   4  15   3   23.57   15.41
  -4 -15  -4   -5.85    8.88
   4  15   4   -3.20   10.76
  -4 -15  -5   40.69   16.39
   4  15   5   42.78   18.66
  -4 -15  -6    1.75    9.22
   4  15   6   -7.86    8.58
  -4 -15  -7    5.76   12.42
   4  15   7   19.64   14.47
  -4 -15  -8    1.37   12.30
   4  15   8    3.12   13.58
  -4 -15  -9   12.64   13.70
   4  15   9    4.06   12.25
  -4 -15 -10    7.73   13.36
   4  15  10  -16.91    8.50
  -4 -15 -11   22.20   16.18
   4  15  11   28.52   16.91
  -4 -15 -12   -7.68   11.57
   4  15  12    2.82   15.41
  -4 -15 -13   11.31   15.16
   4  15  13   17.16   15.92
  -4 -15 -14    7.51   15.24
   4  15  14    3.24   16.48
  -4 -15 -15    1.92   15.88
   4  15  15   -4.74   14.05
   4  16  -6    2.99   13.79
   4  16  -1   12.42   16.78
   4  16   0    7.68   16.39
  -4 -16  -1  -13.66   10.84
   4  16   1   18.23   17.46
  -4 -16  -2   -5.42   11.10
   4  16   2   13.32   16.35
  -4 -16  -3    3.88   12.89
   4  16   3    1.07   14.39
  -4 -16  -4    2.65   12.72
   4  16   4   26.17   18.02
  -4 -16  -5   -8.84   10.80
   4  16   5    0.21   12.81
  -4 -16  -6    1.11   12.25
   4  16   6    3.42   14.86
  -4 -16  -7   -3.71   11.57
   4  16   7   29.59   18.78
  -4 -16  -8    9.69   12.89
   4  16   8   18.57   17.16
  -4 -16  -9    2.60   11.27
   4  16   9    8.97   16.31
  -4 -16 -10   17.67   14.56
   4  16  10   27.84   17.85
  -4 -16 -11   18.31   16.09
   4  16  11   12.72   15.71
  -4 -16 -12   21.94   17.20
   4  16  12   15.58   17.29
  -4 -16 -13    0.30   14.17
   4  16  13   -4.95   14.17
   4  17   0   16.65   17.97
   4  17   1    9.18   18.44
  -4 -17  -2  -13.66   10.63
   4  17   2    5.64   14.30
  -4 -17  -3    7.43   12.89
   4  17   3   19.64   18.40
  -4 -17  -4    9.48   12.72
   4  17   4   -3.29   13.92
  -4 -17  -5   11.14   13.15
   4  17   5   -5.25   14.34
  -4 -17  -6   11.83   14.34
   4  17   6   -3.76   14.47
  -4 -17  -7   -1.45   12.94
   4  17   7    6.96   16.48
  -4 -17  -8    3.97   13.49
   4  17   8    7.26   14.81
  -4 -17  -9   -0.73   11.19
   4  17   9   -0.81   15.20
  -4 -17 -10    4.99   15.28
  -4 -17 -11   25.19   18.27
   4  18   1    6.79   17.89
   4  18   2    2.69   16.14
  -4 -18  -3    0.04   21.69
   4  18   3   16.56   20.24
  -4 -18  -4   -6.87   12.25
   4  18   4   -1.41   15.84
  -4 -18  -5    1.15   12.98
  -4 -18  -6    4.87   14.26
  -4 -18  -7    2.60   14.52
  -4 -18  -8   -2.18   12.81
  -5  14   3   -8.20   11.06
  -5  14   2    2.18   15.07
  -5  14   1   13.83   16.65
   5 -14  -1   -4.53   13.79
  -5  14   0   -6.10   13.53
   5 -14   0    0.43   11.87
  -5  13   7    3.20   15.16
   5 -13  -7   -4.70   17.29
  -5  13   6   -1.92   13.75
   5 -13  -6   -7.26   17.12
  -5  13   5   -1.28   15.28
   5 -13  -5    3.88   17.16
  -5  13   4  -19.94   12.68
   5 -13  -4   26.51   18.87
  -5  13   3   -0.81   14.09
   5 -13  -3    4.99   11.95
   5 -13  -3   18.06   20.41
  -5  13   2    0.09   12.51
   5 -13  -2   -2.39   10.72
   5 -13  -2    6.96   15.67
  -5  13   1    9.14   14.73
   5 -13  -1  -10.42    9.09
   5 -13  -1   14.05   19.21
  -5  13   0   39.40   18.57
   5 -13   0   38.08   17.33
   5 -13   0   12.85   19.25
  -5  13  -1    5.89   14.26
   5 -13   1   21.09   19.04
   5 -13   2   17.76   19.55
   5 -13   3   20.07   18.27
   5 -13   4   13.36   19.85
   5 -12 -10   20.88   16.14
  -5  12   9    2.73   12.21
   5 -12  -9   13.06   14.77
  -5  12   8   31.34   19.55
   5 -12  -8   30.44   20.66
  -5  12   7    8.28   15.20
   5 -12  -7    2.95   16.91
  -5  12   6   14.69   17.03
   5 -12  -6   29.46   18.31
  -5  12   5   -4.99   11.19
   5 -12  -5    8.20   15.63
  -5  12   4    1.96   13.41
   5 -12  -4    5.42   10.72
   5 -12  -4  -15.88   13.96
  -5  12   3   -9.56   12.38
   5 -12  -3    2.90   11.19
   5 -12  -3   16.35   17.93
  -5  12   2   24.16   16.86
   5 -12  -2   16.91   12.89
   5 -12  -2   48.16   21.77
  -5  12   1    0.98   13.58
   5 -12  -1    6.66   12.30
   5 -12  -1    9.35   14.34
  -5  12   0   27.15   18.02
   5 -12   0   51.74   22.93
  -5  12  -1  -16.99    9.78
   5 -12   1   28.65   18.14
  -5  12  -2   41.24   17.08
   5 -12   2   66.17   25.19
   5 -12   3   -9.61   12.00
   5 -12   4   29.97   21.00
   5 -12   5   19.81   17.97
   5 -12   6   -2.01   15.45
   5 -12   7    7.51   15.07
   5 -12   8    7.04   15.67
   5 -11 -12   13.92   14.86
  -5  11  11    5.64   12.94
   5 -11 -11   -3.33   11.14
  -5  11  10   10.20   12.89
   5 -11 -10   23.10   14.69
  -5  11   9   11.70   14.00
   5 -11  -9    4.48   15.24
  -5  11   8    0.98   14.47
   5 -11  -8   -7.26   13.53
  -5  11   7   28.26   17.42
   5 -11  -7   60.75   22.03
  -5  11   6    1.79   11.31
   5 -11  -6    9.01   10.20
   5 -11  -6    0.21   13.75
  -5  11   5   10.16   14.05
   5 -11  -5   17.55   11.83
   5 -11  -5   27.15   16.52
  -5  11   4   -1.45    9.43
   5 -11  -4   -1.49    8.67
   5 -11  -4    9.78   14.94
  -5  11   3   17.93   12.47
   5 -11  -3   21.18   12.64
   5 -11  -3   16.09   13.96
  -5  11   2    8.75   12.38
   5 -11  -2    2.90   10.12
   5 -11  -2   -8.97   13.41
  -5  11   1   57.93   18.44
   5 -11  -1   66.22   18.27
   5 -11  -1   77.61   23.91
  -5  11   0    8.92   12.12
   5 -11   0    0.73   13.53
  -5  11  -1   34.92   16.14
   5 -11   1    8.15   14.22
  -5  11  -2   58.40   17.97
   5 -11   2   63.23   21.56
  -5  11  -3   62.33   17.59
   5 -11   3   62.29   21.86
   5 -11   4   78.34   23.31
   5 -11   5   41.28   19.30
   5 -11   6    7.56   16.74
   5 -11   7   -7.43   12.25
   5 -11   8  -14.26   14.17
   5 -11   9  -22.20   12.25
   5 -11  10   12.08   15.67
   5 -10 -14   17.12   14.86
  -5  10  13   -2.56   12.04
   5 -10 -13   11.36   14.26
  -5  10  12   -6.32   10.84
   5 -10 -12    2.73   12.42
  -5  10  11   18.40   15.11
   5 -10 -11   16.61   12.55
  -5  10  10   -0.94   12.85
   5 -10 -10    3.63    9.73
  -5  10   9    5.59   12.85
   5 -10  -9   -9.48   11.10
  -5  10   8   -4.10    9.61
   5 -10  -8    4.53    9.26
   5 -10  -8    1.88   12.68
  -5  10   7    1.20   10.80
   5 -10  -7   -6.10    7.13
   5 -10  -7    6.06   11.14
  -5  10   6   -4.57   10.20
   5 -10  -6   -4.23    8.07
   5 -10  -6   -4.01   10.25
  -5  10   5   25.70   16.52
   5 -10  -5   23.35   12.42
   5 -10  -5   45.85   17.89
  -5  10   4   21.52   13.49
   5 -10  -4   28.90   12.68
   5 -10  -4   56.10   18.57
  -5  10   3   21.09   12.42
   5 -10  -3   14.90   12.00
   5 -10  -3    1.32   11.91
  -5  10   2   62.93   17.67
   5 -10  -2   52.98   15.54
   5 -10  -2   76.97   20.41
  -5  10   1    0.43    9.90
   5 -10  -1   -1.02    8.67
   5 -10  -1   -6.40   11.36
  -5  10   0    5.51   10.72
   5 -10   0   10.76   12.25
  -5  10  -1  141.57   24.46
   5 -10   1  151.90   28.35
  -5  10  -2    1.49    9.90
   5 -10   2   -7.17    9.35
  -5  10  -3  120.01   21.22
   5 -10   3  158.52   29.46
  -5  10  -4   13.11   11.10
   5 -10   4   24.93   17.03
   5 -10   5   33.68   17.12
   5 -10   6   18.53   16.69
   5 -10   7    9.39   15.20
   5 -10   8    5.89   13.32
   5 -10   9   15.50   16.09
   5 -10  10   -4.31   12.89
   5 -10  11    3.67   16.14
   5 -10  12  -12.12   13.70
   5  -9 -16   25.49   17.50
  -5   9  15    5.89   13.62
   5  -9 -15    5.89   13.66
  -5   9  14   41.41   19.21
   5  -9 -14    4.87   12.00
  -5   9  13   15.67   14.09
   5  -9 -13    0.94   11.14
  -5   9  12   17.72   15.33
   5  -9 -12   14.30   13.66
  -5   9  11   -3.07    9.52
   5  -9 -11   18.57   11.87
  -5   9  10  -10.20    8.07
   5  -9 -10    4.31   10.93
  -5   9   9   -0.30   10.08
   5  -9  -9    0.64    7.90
   5  -9  -9   -5.17    7.34
  -5   9   8    2.56   11.40
   5  -9  -8    3.37    8.45
   5  -9  -8    9.22   10.33
  -5   9   7    8.75   10.84
   5  -9  -7   -1.37    8.20
   5  -9  -7   -5.42    9.73
  -5   9   6   19.00   14.22
   5  -9  -6   17.63   11.06
   5  -9  -6   21.90   14.34
  -5   9   5   25.53   15.45
   5  -9  -5    7.81    9.61
   5  -9  -5   21.82   12.76
  -5   9   4   23.74   12.98
   5  -9  -4   17.46   11.19
   5  -9  -4   14.52   12.30
  -5   9   3  158.60   27.32
   5  -9  -3  149.85   23.27
   5  -9  -3  182.25   29.24
  -5   9   2   -0.60    9.61
   5  -9  -2    7.77    9.56
   5  -9  -2    5.04    9.69
  -5   9   1   31.38   14.47
   5  -9  -1   32.15   12.94
   5  -9  -1   43.38   15.92
  -5   9   0  143.92   24.63
   5  -9   0  127.27   23.86
  -5   9  -1   27.37   12.98
   5  -9   1   74.88   20.75
  -5   9  -2  105.15   19.98
   5  -9   2  105.79   22.63
  -5   9  -3    8.37    9.26
   5  -9   3   -5.89    8.97
  -5   9  -4   48.07   13.87
   5  -9   4   52.72   18.14
  -5   9  -5   17.89    9.73
   5  -9   5   14.34   14.22
   5  -9   6   18.74   13.62
   5  -9   7   32.06   16.99
   5  -9   8    5.51   12.47
   5  -9   9   17.59   15.80
   5  -9  10   -2.48   10.97
   5  -9  11   23.44   16.05
   5  -9  12   -1.88   12.21
   5  -9  13    3.24   15.20
   5  -9  14    0.68   15.84
  -5   8  16    0.13   12.21
  -5   8  15   42.95   17.85
   5  -8 -15   25.83   16.14
  -5   8  14   12.38   13.19
   5  -8 -14    0.73   10.84
  -5   8  13   48.67   19.04
   5  -8 -13   19.08   13.53
  -5   8  12   -1.02    9.61
   5  -8 -12  -10.72    9.14
  -5   8  11    3.80   10.37
   5  -8 -11   11.48   11.10
   5  -8 -11   -3.16    8.03
  -5   8  10    8.03   12.21
   5  -8 -10    4.27    9.69
   5  -8 -10    7.77    9.39
  -5   8   9   -7.34    9.01
   5  -8  -9    1.24    8.07
   5  -8  -9    3.76    9.69
  -5   8   8    3.29    9.78
   5  -8  -8   -3.33    7.60
   5  -8  -8    2.65    8.75
  -5   8   7   18.19   12.51
   5  -8  -7    0.77    8.28
   5  -8  -7    7.81   11.01
  -5   8   6    4.87    9.86
   5  -8  -6    5.12    8.24
   5  -8  -6    2.26    8.71
  -5   8   5   -8.03    6.87
   5  -8  -5    3.42    8.32
   5  -8  -5   -0.64    8.75
  -5   8   4   54.86   16.39
   5  -8  -4   42.48   14.17
   5  -8  -4   61.22   16.48
  -5   8   3   -5.68    8.07
   5  -8  -3    2.22    7.81
   5  -8  -3   -1.79    8.97
  -5   8   2  100.20   21.18
   5  -8  -2   85.26   18.14
   5  -8  -2   94.73   19.34
  -5   8   1  102.97   21.30
   5  -8  -1  105.36   19.51
   5  -8  -1   81.54   18.61
  -5   8   0  -14.60    7.98
   5  -8   0  -11.10    7.43
  -5   8  -1   42.86   14.05
   5  -8   1   52.72   15.92
  -5   8  -2   24.68   12.68
   5  -8   2   38.64   14.26
  -5   8  -3   39.53   13.11
   5  -8   3   17.93   13.15
  -5   8  -4   53.49   13.79
   5  -8   4   71.04   18.40
  -5   8  -5    4.48    7.43
   5  -8   5   10.84   12.04
   5  -8   6  176.87   29.20
   5  -8   7    3.63    9.90
   5  -8   8   59.90   18.57
   5  -8   9   -1.62   11.91
   5  -8  10   -1.24   12.42
   5  -8  11   28.43   16.35
   5  -8  12   11.78   14.94
   5  -8  13  -15.16   10.76
   5  -8  14   -4.48   14.17
   5  -8  15   -4.01   12.64
  -5   7  16   12.00   11.57
  -5   7  15   16.56   13.87
   5  -7 -15   10.29   12.08
  -5   7  14   22.41   13.96
   5  -7 -14   21.82   12.47
  -5   7  13   -3.29    9.52
   5  -7 -13    7.21   10.67
  -5   7  12   15.58   12.55
   5  -7 -12    2.52    9.18
   5  -7 -12    3.84   10.16
  -5   7  11    1.49    8.97
   5  -7 -11    3.24    8.71
   5  -7 -11   -1.88    9.09
  -5   7  10   13.75   11.87
   5  -7 -10   14.86   10.63
   5  -7 -10   20.28   11.23
  -5   7   9   34.20   14.22
   5  -7  -9   36.80   13.53
   5  -7  -9   40.94   13.79
  -5   7   8   20.32   12.85
   5  -7  -8   31.25   12.68
   5  -7  -8   35.05   12.94
  -5   7   7    0.85    9.39
   5  -7  -7    0.94    7.51
   5  -7  -7   -2.65    6.53
  -5   7   6   10.03    9.99
   5  -7  -6   -2.35    7.26
   5  -7  -6    7.21    8.97
  -5   7   5   -0.60    7.64
   5  -7  -5   -1.15    7.00
   5  -7  -5   -0.64    7.39
  -5   7   4  159.16   25.36
   5  -7  -4  158.69   22.80
   5  -7  -4  191.26   22.50
  -5   7   3    6.62    9.09
   5  -7  -3    7.04    7.77
   5  -7  -3   -1.62    8.28
  -5   7   2   35.61   14.00
   5  -7  -2   63.36   15.63
   5  -7  -2   32.06   13.02
  -5   7   1    3.42   10.97
   5  -7  -1   -1.45    7.86
   5  -7  -1   12.85    9.01
  -5   7   0  100.88   20.24
   5  -7   0  144.68   22.75
  -5   7  -1  -16.65    7.56
   5  -7   1   -1.32    8.41
  -5   7  -2    6.28   10.29
   5  -7   2   13.62   10.20
  -5   7  -3   74.28   15.45
   5  -7   3   62.84   16.14
  -5   7  -4  137.21   16.82
   5  -7   4  163.72   24.72
  -5   7  -5  104.08   16.74
   5  -7   5  139.35   24.29
  -5   7  -6   76.76   14.26
   5  -7   6   57.16   16.44
   5  -7   7   24.85   13.36
   5  -7   8    1.24    9.18
   5  -7   9    8.45   12.12
   5  -7  10    7.47   12.51
   5  -7  11   25.02   14.69
   5  -7  12   -1.20   10.63
   5  -7  13    1.84   11.70
   5  -7  14   -6.15   10.37
  -5   7 -15    5.93   11.78
   5  -7  15   -4.01   11.91
  -5   7 -16    1.58   12.81
   5  -7  16    7.04   14.64
  -5   6  16    1.75   11.57
  -5   6  15   -4.65   10.72
   5  -6 -15   -4.61   18.96
  -5   6  14    7.56   11.01
   5  -6 -14    6.66   10.67
  -5   6  13   11.87   12.08
   5  -6 -13   15.54   10.80
   5  -6 -13    3.84    9.61
  -5   6  12   17.97   13.96
   5  -6 -12   12.98   10.93
   5  -6 -12   11.48   10.37
  -5   6  11   -5.38    8.24
   5  -6 -11    2.39    7.68
   5  -6 -11    0.98    8.41
  -5   6  10   73.43   18.44
   5  -6 -10   59.00   16.27
   5  -6 -10   77.06   17.55
  -5   6   9   16.52   11.70
   5  -6  -9   13.36   10.08
   5  -6  -9    5.17    8.79
  -5   6   8   71.08   18.57
   5  -6  -8   63.06   15.50
   5  -6  -8   42.69   13.41
  -5   6   7   29.37   12.81
   5  -6  -7   15.58    8.79
   5  -6  -7   25.87   11.01
  -5   6   6    7.51    8.54
   5  -6  -6   13.19    8.88
   5  -6  -6    7.34    8.50
  -5   6   5   79.32   18.23
   5  -6  -5   86.32   17.38
   5  -6  -5   85.43   16.65
  -5   6   4   26.17   11.83
   5  -6  -4   18.49    9.61
   5  -6  -4   26.68   10.42
  -5   6   3   22.71   10.16
   5  -6  -3   31.04   10.84
   5  -6  -3   13.19    9.69
  -5   6   2    0.85    7.04
   5  -6  -2    2.90    6.66
   5  -6  -2    2.77    7.13
  -5   6   1  180.93   20.15
   5  -6  -1  157.62   18.96
   5  -6  -1  176.10   19.64
  -5   6   0  138.58   20.19
   5  -6   0  112.96   18.78
  -5   6  -1   -2.65    6.92
   5  -6   1   -2.31    6.49
  -5   6  -2  514.31   29.50
   5  -6   2  532.50   33.09
  -5   6  -3   28.69   10.16
   5  -6   3   23.69   10.97
  -5   6  -4    3.03    5.98
   5  -6   4    5.46    8.58
  -5   6  -5  101.48   15.37
   5  -6   5   66.26   15.88
  -5   6  -6   -3.20    5.04
   5  -6   6    7.21    9.48
  -5   6  -7   38.68    9.56
   5  -6   7   53.71   16.14
   5  -6   8   13.79   10.33
   5  -6   9   22.03   12.55
   5  -6  10    9.90    9.90
   5  -6  11    5.76   11.01
   5  -6  12   -5.17    7.90
  -5   6 -13   -8.84    9.05
   5  -6  13   -6.49    9.43
  -5   6 -14   11.48   11.40
   5  -6  14    7.21   10.89
  -5   6 -15    0.73   11.19
   5  -6  15   -4.74    9.65
  -5   6 -16    1.92   11.01
   5  -6  16   12.55   14.77
  -5   6 -17    3.29   12.12
   5  -6  17    7.00   14.00
  -5   5  16   -5.89   10.20
  -5   5  15   15.80   13.19
   5  -5 -15   21.09   15.50
  -5   5  14    2.52   11.27
   5  -5 -14    3.80    9.99
   5  -5 -14    1.28    8.97
  -5   5  13    9.82   11.57
   5  -5 -13    0.09    8.67
   5  -5 -13    5.89    9.78
  -5   5  12    8.71    9.78
   5  -5 -12    9.61   10.84
   5  -5 -12   23.31   11.23
  -5   5  11   18.78   11.27
   5  -5 -11   24.51   10.93
   5  -5 -11    9.99    9.31
  -5   5  10    3.71    9.61
   5  -5 -10    4.78    8.79
   5  -5 -10    6.28    8.41
  -5   5   9   31.63   12.47
   5  -5  -9   43.03   13.41
   5  -5  -9   21.73   10.72
  -5   5   8   28.39   11.91
   5  -5  -8   32.45   11.44
   5  -5  -8   24.33   10.29
  -5   5   7   -6.45    7.09
   5  -5  -7   -1.75    6.87
   5  -5  -7    1.88    7.04
  -5   5   6    6.87    8.41
   5  -5  -6    6.79    7.47
   5  -5  -6    6.92    7.51
  -5   5   5   10.25    9.35
   5  -5  -5   -0.09    6.15
   5  -5  -5    0.09    5.51
  -5   5   4  107.97   19.13
   5  -5  -4  105.88   18.10
   5  -5  -4   95.67   16.05
  -5   5   3   -2.82    6.36
   5  -5  -3    1.92    5.68
   5  -5  -3    2.35    6.96
  -5   5   2   -2.65    6.10
   5  -5  -2   -1.20    6.10
   5  -5  -2    0.98    6.23
  -5   5   1  402.42   26.60
   5  -5  -1  279.04   22.67
   5  -5  -1  376.89   25.91
  -5   5   0  165.26   18.23
   5  -5   0  146.95   20.45
   5  -5   0  124.75   18.14
  -5   5  -1 1003.35   39.36
   5  -5   1  898.84   38.68
  -5   5  -2  335.09   23.05
   5  -5   2  344.44   25.87
  -5   5  -3  453.60   25.53
   5  -5   3  405.57   27.37
  -5   5  -4  116.38   13.96
   5  -5   4  116.42   18.74
  -5   5  -5   36.93    9.56
   5  -5   5   38.47   12.38
  -5   5  -6   30.27    8.50
   5  -5   6   22.71   10.63
  -5   5  -7    9.26    6.15
   5  -5   7    9.01    8.62
   5  -5   8    4.01    7.90
   5  -5   9   15.97   11.44
   5  -5  10   28.05   12.98
   5  -5  11  102.33   21.52
  -5   5 -12   -1.66    9.48
   5  -5  12    0.94    9.43
  -5   5 -13   -6.10    6.92
   5  -5  13   -7.68    7.30
  -5   5 -14    3.33    9.95
   5  -5  14   -1.71    9.99
  -5   5 -15    5.93   10.59
   5  -5  15   -4.10   10.80
  -5   5 -16    5.46   12.21
   5  -5  16    1.84   11.87
  -5   5 -17   -1.96   11.44
   5  -5  17   -2.82   10.67
  -5   5 -18   17.38   15.54
   5  -5  18   21.13   17.89
   5  -4 -16    7.09   12.34
  -5   4  15    1.71   10.29
   5  -4 -15    1.62   10.67
  -5   4  14   35.35   14.52
   5  -4 -14   31.46   14.34
   5  -4 -14   15.84   18.87
  -5   4  13   10.93   10.80
   5  -4 -13   12.34   10.59
   5  -4 -13   17.76   10.50
  -5   4  12    0.55    9.05
   5  -4 -12   -0.55    7.51
   5  -4 -12    1.49    7.51
  -5   4  11    8.32   10.29
   5  -4 -11    1.79    7.56
   5  -4 -11    4.87    7.98
  -5   4  10   11.23    9.14
   5  -4 -10    7.81    8.28
   5  -4 -10    5.93    7.56
  -5   4   9   66.90   16.99
   5  -4  -9   77.61   15.75
   5  -4  -9   82.91   16.01
  -5   4   8   13.92    9.95
   5  -4  -8    5.21    8.07
   5  -4  -8    5.25    7.13
  -5   4   7  100.33   19.17
   5  -4  -7   73.05   15.67
   5  -4  -7   61.99   13.02
  -5   4   6   43.63   12.98
   5  -4  -6   48.63   13.06
   5  -4  -6   33.81   10.93
  -5   4   5  145.92   17.76
   5  -4  -5  159.20   18.14
   5  -4  -5  169.74   17.25
  -5   4   4   14.60    8.28
   5  -4  -4   11.19    8.50
   5  -4  -4    8.03    6.53
  -5   4   3   11.06    8.03
   5  -4  -3   16.69    8.41
   5  -4  -3   12.81    7.43
  -5   4   2   84.44   14.90
   5  -4  -2  101.22   16.61
   5  -4  -2   85.04   14.69
  -5   4   1  362.67   24.12
   5  -4  -1  323.90   22.93
   5  -4  -1  354.56   22.75
  -5   4   0  421.67   25.44
   5  -4   0  423.04   26.51
   5  -4   0  404.98   24.46
  -5   4  -1  899.65   35.22
   5  -4   1  920.27   36.76
  -5   4  -2  704.50   30.57
   5  -4   2  724.53   33.00
  -5   4  -3  172.95   15.92
   5  -4   3  165.09   18.02
  -5   4  -4   28.09    8.50
   5  -4   4   34.96   10.50
  -5   4  -5    6.53    5.51
   5  -4   5   13.23    7.81
  -5   4  -6   10.54    5.81
   5  -4   6   14.52    8.41
  -5   4  -7  121.54   11.91
   5  -4   7   94.22   17.46
  -5   4  -8   10.50    5.34
   5  -4   8    6.96    8.24
   5  -4   9    8.50    7.90
   5  -4  10   52.85   14.52
  -5   4 -11   10.89   10.46
   5  -4  11   12.17   10.72
  -5   4 -12   29.20   13.79
   5  -4  12   34.50   14.34
  -5   4 -13   64.29   18.02
   5  -4  13   46.02   15.84
  -5   4 -14   -0.73    9.73
   5  -4  14    6.87   10.46
  -5   4 -15   15.37   12.59
   5  -4  15   -3.03    8.24
  -5   4 -16   12.81   11.40
   5  -4  16   10.03   13.23
  -5   4 -17    4.99   10.08
   5  -4  17    5.42   12.64
  -5   4 -18   -1.49   10.72
   5  -4  18    5.25   12.08
  -5   4 -19    9.56   13.36
   5  -4  19   19.42   18.74
   5  -3 -17   18.14   14.47
   5  -3 -16   23.31   16.18
  -5   3  15   33.09   16.01
   5  -3 -15   57.59   19.38
  -5   3  14   12.17   11.61
   5  -3 -14   33.30   14.86
  -5   3  13   13.58   10.80
   5  -3 -13    7.21    9.69
   5  -3 -13    7.30    9.14
  -5   3  12    3.12    9.14
   5  -3 -12    3.12    8.32
   5  -3 -12    7.34    7.64
  -5   3  11    2.35    8.54
   5  -3 -11   12.98    9.35
   5  -3 -11    3.33    7.39
  -5   3  10   18.91   11.14
   5  -3 -10   26.51   12.08
   5  -3 -10    6.70    7.21
  -5   3   9   50.16   14.00
   5  -3  -9   59.60   14.90
   5  -3  -9   35.26   10.84
  -5   3   8   88.50   17.03
   5  -3  -8   64.42   14.69
   5  -3  -8   68.82   13.66
  -5   3   7    1.45    6.02
   5  -3  -7    4.70    6.66
   5  -3  -7    2.22    5.42
  -5   3   6  267.38   23.35
   5  -3  -6  236.98   20.71
   5  -3  -6  278.86   20.11
  -5   3   5  207.70   20.53
   5  -3  -5  220.29   20.11
   5  -3  -5  192.33   16.78
  -5   3   4   52.21   12.51
   5  -3  -4   30.78    9.78
   5  -3  -4   34.20    9.14
  -5   3   3   35.99   10.29
   5  -3  -3   26.26    9.14
   5  -3  -3   28.01    8.50
  -5   3   2  599.40   30.18
   5  -3  -2  641.92   30.74
   5  -3  -2  552.31   26.00
  -5   3   1    4.48    5.76
   5  -3  -1   -4.57    4.35
   5  -3  -1   -4.82    3.37
  -5   3   0  632.18   29.46
   5  -3   0  602.94   27.19
  -5   3  -1    7.68    5.85
   5  -3   1   -1.37    4.95
   5  -3   1    1.37    4.91
  -5   3  -2  913.40   33.26
   5  -3   2  777.76   31.76
  -5   3  -3  369.88   21.13
   5  -3   3  360.15   23.14
  -5   3  -4  175.64   14.81
   5  -3   4  153.48   16.14
  -5   3  -5   90.04   11.19
   5  -3   5   61.65   12.42
  -5   3  -6   21.26    6.87
   5  -3   6   21.09    8.97
  -5   3  -7    2.52    4.14
   5  -3   7    3.12    6.75
  -5   3  -8    3.24    4.01
   5  -3   8    8.58    7.51
  -5   3  -9  155.48   12.12
   5  -3   9  104.00   17.97
   5  -3  10   14.73    9.65
  -5   3 -11    5.72    9.56
   5  -3  11    7.64    8.71
  -5   3 -12  176.57   21.90
  -5   3 -12  246.08   27.84
   5  -3  12  216.15   25.57
  -5   3 -13   -4.35    6.66
  -5   3 -13   -4.23    9.82
   5  -3  13   -0.13    8.41
  -5   3 -14   95.50   21.22
  -5   3 -14  108.95   24.21
   5  -3  14   73.56   19.17
  -5   3 -15   -2.52    9.18
  -5   3 -15    1.62   10.29
   5  -3  15    2.86    9.22
  -5   3 -16    2.22   10.67
  -5   3 -16    1.32   11.40
   5  -3  16   -0.51    9.43
  -5   3 -17    6.87   10.80
  -5   3 -17    4.01   14.56
   5  -3  17    0.13   11.14
  -5   3 -18   18.40   14.47
  -5   3 -18   10.93   14.73
   5  -3  18    8.15   14.47
  -5   3 -19    2.48   11.40
  -5   3 -19   -5.42   14.26
   5  -3  19   21.13   16.09
  -5   3 -20   16.22   15.28
   5  -2 -18    0.13   11.06
   5  -2 -17   51.96   18.74
   5  -2 -16   -9.69    9.90
   5  -2 -15   53.54   18.27
  -5   2  14   15.63   11.14
   5  -2 -14    4.53   11.01
  -5   2  13   42.61   14.09
   5  -2 -13   30.35   13.32
  -5   2  12   -2.56    7.98
   5  -2 -12   14.43   10.54
   5  -2 -12    6.57    7.81
  -5   2  11    6.70    9.31
   5  -2 -11    3.84    8.97
   5  -2 -11    1.02    6.45
  -5   2  10    0.34    7.86
   5  -2 -10    4.10    7.34
   5  -2 -10    1.92    5.98
  -5   2   9   76.38   15.63
   5  -2  -9   90.51   17.89
   5  -2  -9   58.62   12.08
  -5   2   8  130.47   19.81
   5  -2  -8  147.59   21.30
   5  -2  -8  104.51   15.24
  -5   2   7   -2.31    4.99
   5  -2  -7    3.24    7.04
   5  -2  -7   -0.98    4.31
  -5   2   6   77.32   14.98
   5  -2  -6   73.86   14.81
   5  -2  -6   57.04   10.67
  -5   2   5   26.60    9.35
   5  -2  -5   23.01    9.43
   5  -2  -5   19.60    7.43
  -5   2   4  215.00   19.47
   5  -2  -4  196.73   18.44
   5  -2  -4  178.37   14.81
  -5   2   3  989.26   37.44
   5  -2  -3  861.87   34.88
   5  -2  -3  930.82   30.61
  -5   2   2  134.57   15.54
   5  -2  -2  148.10   15.33
   5  -2  -2  114.63   12.04
  -5   2   1  370.44   22.41
   5  -2  -1  400.84   23.31
   5  -2  -1  325.40   18.74
  -5   2   0    5.98    5.89
   5  -2   0   -0.13    5.04
   5  -2   0    2.65    4.44
  -5   2  -1  160.27   15.20
   5  -2   1  125.73   14.64
   5  -2   1  150.66   13.96
  -5   2  -2  101.74   13.87
   5  -2   2  102.72   12.00
  -5   2  -3  384.02   20.66
   5  -2   3  350.76   20.92
  -5   2  -4  766.02   27.62
   5  -2   4  686.83   29.63
  -5   2  -5  192.16   14.26
   5  -2   5  189.34   17.08
  -5   2  -6  239.59   15.03
   5  -2   6  230.41   19.30
  -5   2  -7    1.88    3.67
   5  -2   7    6.87    7.04
  -5   2  -8   23.78    6.10
  -5   2  -8   38.85   11.48
   5  -2   8   28.56   10.29
  -5   2  -9   10.03    4.40
  -5   2  -9    9.65    8.15
   5  -2   9    9.22    4.48
   5  -2   9   12.85    8.20
  -5   2 -10  109.21   18.23
  -5   2 -10  107.63   18.78
   5  -2  10  112.15   18.91
  -5   2 -11    1.88    7.64
  -5   2 -11   16.61    9.86
   5  -2  11    5.17    7.98
  -5   2 -12   -2.31    7.26
  -5   2 -12    3.29   10.12
   5  -2  12   -4.06    7.30
  -5   2 -13   83.85   18.40
  -5   2 -13   82.74   19.81
   5  -2  13   76.72   18.53
  -5   2 -14   16.74   10.16
  -5   2 -14   17.16   11.78
   5  -2  14   20.28   12.00
  -5   2 -15   59.04   16.74
  -5   2 -15   44.78   16.52
   5  -2  15   39.87   15.03
  -5   2 -16   18.61   13.58
  -5   2 -16    4.23   11.27
   5  -2  16    5.76   10.59
  -5   2 -17   -4.57    9.01
  -5   2 -17    9.69   12.89
   5  -2  17   17.38   13.53
  -5   2 -18    0.64   11.10
  -5   2 -18   25.79   17.67
   5  -2  18   23.91   15.45
  -5   2 -19   -0.55   11.44
  -5   2 -19   27.62   19.13
   5  -2  19    7.09   13.36
  -5   2 -20   21.09   14.52
  -5   2 -20   26.34   20.24
   5  -2  20   41.33   19.13
   5  -1 -19    6.66   14.39
   5  -1 -18   21.22   15.58
   5  -1 -17    6.75   13.45
   5  -1 -16   32.74   16.99
   5  -1 -15   17.25   13.58
   5  -1 -14   31.51   15.50
  -5   1  13    2.99    8.15
   5  -1 -13    1.45    9.31
  -5   1  12  109.72   19.34
   5  -1 -12   88.63   18.87
  -5   1  11   -1.28    7.00
   5  -1 -11   16.56   10.25
   5  -1 -11   -1.92    5.72
  -5   1  10   13.70    9.05
   5  -1 -10   25.02   10.93
   5  -1 -10   26.51    8.67
  -5   1   9   46.71   13.11
   5  -1  -9   40.00   12.30
   5  -1  -9   41.71   10.08
  -5   1   8   26.38   10.63
   5  -1  -8   26.17   10.08
   5  -1  -8   28.95    8.20
  -5   1   7   23.78    8.92
   5  -1  -7   23.82    9.48
   5  -1  -7   29.63    8.28
  -5   1   6   44.91   11.40
   5  -1  -6   45.94   11.44
   5  -1  -6   56.18    9.86
  -5   1   5   61.09   12.68
   5  -1  -5   95.46   15.24
   5  -1  -5   93.97   10.59
  -5   1   4  439.64   25.19
   5  -1  -4  449.21   25.57
   5  -1  -4  422.10   19.34
  -5   1   3  511.11   26.68
   5  -1  -3  486.22   25.79
   5  -1  -3  466.03   19.94
  -5   1   2 1474.33   43.08
   5  -1  -2 1538.32   43.67
   5  -1  -2 1279.14   31.63
  -5   1   1   11.40    6.83
   5  -1  -1   14.47    6.87
   5  -1  -1    9.52    4.95
  -5   1   0  202.57   16.05
   5  -1   0  167.52   15.63
   5  -1   0  180.63   13.32
  -5   1  -1    6.96    5.38
   5  -1   1    3.37    5.34
   5  -1   1    3.12    4.44
  -5   1  -2  109.16   11.83
   5  -1   2  123.64   13.83
   5  -1   2  121.59   12.00
  -5   1  -3  412.32   20.62
   5  -1   3  418.08   21.26
  -5   1  -4   13.92    5.93
   5  -1   4   12.89    6.66
  -5   1  -5 1641.04   37.44
   5  -1   5 1625.50   44.19
  -5   1  -6  173.88   12.72
  -5   1  -6  192.84   17.76
   5  -1   6  190.41   17.46
  -5   1  -7   29.59    6.75
  -5   1  -7   22.50    8.50
   5  -1   7   24.68    8.41
  -5   1  -8    0.94    3.29
  -5   1  -8    1.07    6.53
   5  -1   8    1.54    3.54
   5  -1   8    4.23    6.83
  -5   1  -9    5.04    3.84
  -5   1  -9    6.06    6.96
   5  -1   9    3.42    3.76
   5  -1   9    1.02    6.45
  -5   1 -10   92.34   15.84
  -5   1 -10  127.86   19.64
   5  -1  10  102.16   17.29
  -5   1 -11   86.58   16.09
  -5   1 -11  117.74   19.38
   5  -1  11   76.08   16.01
  -5   1 -12   32.79   10.97
  -5   1 -12   31.46   12.55
   5  -1  12   18.10    9.95
  -5   1 -13    7.90    8.24
  -5   1 -13    3.80    8.75
   5  -1  13    7.30    8.67
  -5   1 -14   37.27   12.68
  -5   1 -14   39.96   14.73
   5  -1  14   24.08   11.95
  -5   1 -15   83.08   18.19
  -5   1 -15  102.67   23.78
   5  -1  15   87.22   20.75
  -5   1 -16   -1.07    9.26
  -5   1 -16   -5.93    9.26
   5  -1  16   -5.64    8.28
  -5   1 -17   93.97   21.00
  -5   1 -17  165.69   30.14
   5  -1  17   97.21   23.05
  -5   1 -18    0.17    9.90
  -5   1 -18   10.89   14.73
   5  -1  18   12.42   13.53
  -5   1 -19   15.58   12.17
  -5   1 -19   20.36   15.71
   5  -1  19   28.43   15.45
  -5   1 -20    4.40   12.17
  -5   1 -20   -1.24   15.11
   5  -1  20   -4.23   12.30
   5   0 -19    2.35   13.92
   5   0 -18    2.43   14.00
   5   0 -17    7.68   12.59
   5   0 -16   66.22   21.30
   5   0 -15    5.93   11.70
   5   0 -14   37.87   15.33
  -5   0  13   44.95   13.70
   5   0 -13   56.31   16.69
  -5   0  12   25.79   11.10
   5   0 -12   24.46   12.55
  -5   0  11   60.32   14.39
   5   0 -11   81.71   18.19
   5   0 -11   89.40   16.91
  -5   0  10   30.91   11.06
   5   0 -10   17.67   10.80
   5   0 -10   17.93    7.51
  -5   0   9   38.81   11.48
   5   0  -9   40.47   13.53
   5   0  -9   37.40    9.61
  -5   0   8    4.40    6.53
   5   0  -8   -1.54    5.51
   5   0  -8   -0.85    3.84
  -5   0   7    5.85    6.53
   5   0  -7    2.77    6.92
   5   0  -7    6.15    4.78
  -5   0   6   57.08   12.68
   5   0  -6   34.92   10.42
   5   0  -6   44.44    8.11
  -5   0   5  413.99   24.25
   5   0  -5  439.86   25.74
   5   0  -5  437.64   18.31
  -5   0   4   13.62    7.56
   5   0  -4    9.18    6.53
   5   0  -4   11.57    4.70
  -5   0   3  667.19   29.12
   5   0  -3  689.22   30.14
   5   0  -3  688.28   20.88
  -5   0   2  165.05   15.07
   5   0  -2  205.69   16.65
   5   0  -2  195.49   11.83
  -5   0   1  139.43   13.75
   5   0  -1  192.37   15.71
   5   0  -1  159.20   10.76
  -5   0   0  569.17   25.10
   5   0   0  576.64   25.27
   5   0   0  571.48   19.42
  -5   0  -1  205.99   15.37
   5   0   1  231.05   16.48
   5   0   1  196.55   12.30
  -5   0  -2  327.79   18.44
   5   0   2  356.82   20.15
   5   0   2  353.62   16.91
  -5   0  -3    5.17    4.82
   5   0   3    6.75    5.89
   5   0   3   -1.41    2.56
  -5   0  -4   65.19   10.12
  -5   0  -4   51.10    9.26
   5   0   4   54.43    9.69
  -5   0  -5    0.73    4.01
  -5   0  -5    0.00    4.27
   5   0   5   -0.38    3.93
  -5   0  -6    2.99    4.31
  -5   0  -6    2.52    5.04
   5   0   6    1.02    5.76
  -5   0  -7 1227.78   30.44
  -5   0  -7 1288.83   41.37
   5   0   7 1245.93   30.74
   5   0   7 1166.73   39.23
  -5   0  -8  127.39   10.42
  -5   0  -8  130.47   15.37
   5   0   8  118.94   10.42
   5   0   8  110.15   16.74
  -5   0  -9  103.96   16.99
   5   0   9   82.31    8.62
  -5   0 -10   -2.60    6.02
   5   0  10    1.71    3.37
  -5   0 -11   24.51    9.52
  -5   0 -11   32.70   12.12
  -5   0 -12  135.16   19.89
  -5   0 -12  118.94   19.98
  -5   0 -13   21.00    9.90
  -5   0 -13   28.39   12.42
  -5   0 -14   41.37   13.15
  -5   0 -14   41.41   15.16
  -5   0 -15   15.37   10.80
  -5   0 -15    7.68   10.93
  -5   0 -16  105.49   20.75
  -5   0 -16  131.83   26.90
  -5   0 -17   39.02   14.13
  -5   0 -17   11.74   14.39
  -5   0 -18   78.21   19.60
  -5   0 -18   82.01   22.33
   5   0  18   54.69   18.02
  -5   0 -19    1.32   11.10
  -5   0 -19    5.51   14.05
   5   0  19   17.93   13.79
  -5   0 -20   16.99   17.42
   5   0  20   13.41   14.86
  -5   0 -21    1.41   25.15
   5   0  21   -2.31   15.03
   5   1 -18    5.76   13.62
   5   1 -17   19.17   14.77
   5   1 -16   17.97   15.33
   5   1 -15   44.36   18.44
   5   1 -14   -5.59    9.65
   5   1 -13   10.03   12.25
  -5  -1  12    2.31    7.26
   5   1 -12    2.39    9.43
  -5  -1  11    1.84    6.79
   5   1 -11    9.99   10.59
  -5  -1  10   17.08    8.97
   5   1 -10   24.12   12.25
   5   1 -10   10.89    7.56
  -5  -1   9   37.14   10.67
   5   1  -9   50.08   13.36
   5   1  -9   45.77    9.52
  -5  -1   8   16.52    8.71
   5   1  -8   15.88    9.05
   5   1  -8   16.09    5.98
  -5  -1   7    3.80    5.34
   5   1  -7    2.09    6.83
   5   1  -7    9.39    4.70
  -5  -1   6    2.48    5.76
   5   1  -6    7.30    6.40
   5   1  -6    4.01    3.97
  -5  -1   5    8.75    6.10
   5   1  -5   20.66    8.88
   5   1  -5   16.78    4.78
  -5  -1   4   34.20    9.52
   5   1  -4   22.29    8.24
   5   1  -4   28.13    5.12
  -5  -1   3   78.94   12.30
   5   1  -3   87.01   13.92
   5   1  -3   89.61    7.21
  -5  -1   2  109.93   12.59
   5   1  -2  133.71   14.13
   5   1  -2  110.23    7.81
  -5  -1   1 2888.59   55.54
   5   1  -1 2628.34   52.72
   5   1  -1 2674.15   33.39
  -5  -1   0  129.57   12.89
   5   1   0  133.63   13.49
   5   1   0  119.24    8.32
  -5  -1  -1 1070.50   32.66
   5   1   1  975.22   30.70
   5   1   1 1036.86   23.78
  -5  -1  -2  111.17   11.57
   5   1   2  115.52   11.53
   5   1   2  112.66    9.56
  -5  -1  -3   40.39    8.79
  -5  -1  -3   42.86    8.03
   5   1   3   33.13    7.60
   5   1   3   38.17    7.39
  -5  -1  -4  344.44   18.14
  -5  -1  -4  382.78   18.83
   5   1   4  359.38   17.97
  -5  -1  -5   79.28    9.69
  -5  -1  -5   80.82   11.74
   5   1   5   67.62   11.10
  -5  -1  -6    3.42    4.35
  -5  -1  -6    4.48    4.99
   5   1   6    1.41    3.84
  -5  -1  -7  244.88   14.77
  -5  -1  -7  280.57   19.47
   5   1   7  275.96   15.33
  -5  -1  -8  315.24   21.64
   5   1   8  288.47   15.45
  -5  -1  -9   78.55   14.05
   5   1   9   67.75    9.31
  -5  -1 -10   36.50   10.89
   5   1  10   69.50    8.54
  -5  -1 -11   12.42    7.68
  -5  -1 -11   29.50   11.23
   5   1  11   16.22    5.34
  -5  -1 -12   86.20   15.11
  -5  -1 -12  105.53   19.30
  -5  -1 -13   13.32    7.86
  -5  -1 -13   15.67    9.48
  -5  -1 -14   -4.10    6.06
  -5  -1 -14   -1.11    7.43
  -5  -1 -15   21.69   10.42
  -5  -1 -15   18.10   11.61
  -5  -1 -16   73.30   17.20
  -5  -1 -16  118.51   24.63
  -5  -1 -17   27.79   11.78
  -5  -1 -17   33.77   15.75
  -5  -1 -18   54.99   15.88
  -5  -1 -18   49.10   19.64
  -5  -1 -19   -3.71   12.76
  -5  -1 -20   34.67   19.77
  -5  -1 -21   14.81   16.91
   5   2 -18   25.49   18.53
   5   2 -17    4.53   13.02
   5   2 -16   43.16   17.59
   5   2 -15   -0.51    9.52
   5   2 -14    3.24   10.89
   5   2 -13    4.53   10.93
   5   2 -12   36.89   14.98
  -5  -2  11   49.18   12.25
   5   2 -11   24.59   12.55
  -5  -2  10    9.14    6.87
   5   2 -10   -0.55    8.71
  -5  -2   9   99.39   16.27
   5   2  -9  119.41   20.71
   5   2  -9  119.54   13.62
  -5  -2   8   86.96   14.43
   5   2  -8  101.91   18.44
   5   2  -8   86.32    9.99
  -5  -2   7   19.21    8.03
   5   2  -7    1.11    6.32
   5   2  -7   29.71    6.28
  -5  -2   6    6.06    5.68
   5   2  -6    3.33    5.81
   5   2  -6   -0.47    2.69
  -5  -2   5    7.64    5.81
   5   2  -5   14.60    7.56
   5   2  -5   11.78    3.80
  -5  -2   4    6.02    6.02
   5   2  -4    6.57    5.89
   5   2  -4    7.21    2.77
  -5  -2   3    8.28    6.45
[truncated: 360,982 more chars]
