# Supplementary material for: Siloxane-containing phosphine (oxide) ligands for enhanced catalytic activity of cobalt complexes for hydrosilylation reactions
Source: Royal Society of Chemistry journal article supplement (doi:10.1039/d4ob00333k), 2024-01-01
Supplement: d4ob00333k2.zip [file d4ob00333k2.zip › NiCl2-2b.cif]

data_mo221108a_sq
_audit_creation_date               2023-06-08
_audit_creation_method
;
Olex2 1.5
(compiled 2021.11.18 svn.ra9532c28 for OlexSys, GUI svn.r6427)
;
_shelx_SHELXL_version_number       '2018/3'
_audit_contact_author_address      ?
_audit_contact_author_email        ?
_audit_contact_author_name         ''
_audit_contact_author_phone        ?
_publ_contact_author_id_orcid      ?
_publ_section_references
;
Dolomanov, O.V., Bourhis, L.J., Gildea, R.J, Howard, J.A.K. & Puschmann, H.
 (2009), J. Appl. Cryst. 42, 339-341.

Sheldrick, G.M. (2015). Acta Cryst. A71, 3-8.

Sheldrick, G.M. (2015). Acta Cryst. C71, 3-8.
;
_chemical_name_common              ?
_chemical_name_systematic          ?
_chemical_formula_moiety           'C47 H44 Cl2 Ni O2 P2 Si'
_chemical_formula_sum              'C47 H44 Cl2 Ni O2 P2 Si'
_chemical_formula_weight           860.46
_chemical_melting_point            ?
loop_
  _atom_type_symbol
  _atom_type_description
  _atom_type_scat_dispersion_real
  _atom_type_scat_dispersion_imag
  _atom_type_scat_source
 'C' 'C' 0.0033 0.0016 'International Tables Vol C Tables 4.2.6.8 and 6.1.1.4'
 'H' 'H' 0.0000 0.0000 'International Tables Vol C Tables 4.2.6.8 and 6.1.1.4'
 'Cl' 'Cl' 0.1484 0.1585 'International Tables Vol C Tables 4.2.6.8 and 6.1.1.4'
 'Ni' 'Ni' 0.3393 1.1124 'International Tables Vol C Tables 4.2.6.8 and 6.1.1.4'
 'O' 'O' 0.0106 0.0060 'International Tables Vol C Tables 4.2.6.8 and 6.1.1.4'
 'P' 'P' 0.1023 0.0942 'International Tables Vol C Tables 4.2.6.8 and 6.1.1.4'
 'Si' 'Si' 0.0817 0.0704 'International Tables Vol C Tables 4.2.6.8 and 6.1.1.4'

_shelx_space_group_comment
;
The symmetry employed for this shelxl refinement is uniquely defined
by the following loop, which should always be used as a source of
symmetry information in preference to the above space-group names.
They are only intended as comments.
;
_space_group_crystal_system        'triclinic'
_space_group_IT_number             2
_space_group_name_H-M_alt          'P -1'
_space_group_name_Hall             '-P 1'
loop_
  _space_group_symop_operation_xyz
 'x, y, z'
 '-x, -y, -z'

_cell_length_a                     11.184(3)
_cell_length_b                     19.316(6)
_cell_length_c                     23.366(7)
_cell_angle_alpha                  83.286(7)
_cell_angle_beta                   84.457(7)
_cell_angle_gamma                  75.853(6)
_cell_volume                       4849(3)
_cell_formula_units_Z              4
_cell_measurement_reflns_used      3220
_cell_measurement_temperature      296.15
_cell_measurement_theta_max        19.346
_cell_measurement_theta_min        2.228
_shelx_estimated_absorpt_T_max     0.963
_shelx_estimated_absorpt_T_min     0.939
_exptl_absorpt_coefficient_mu      0.634
_exptl_absorpt_correction_T_max    1.0000
_exptl_absorpt_correction_T_min    0.8859
_exptl_absorpt_correction_type     multi-scan
_exptl_absorpt_process_details
;
SADABS-2016/2 (Bruker,2016/2) was used for absorption correction.
wR2(int) was 0.0838 before and 0.0680 after correction.
The Ratio of minimum to maximum transmission is 0.8859.
The \l/2 correction factor is 0.00150.
;
_exptl_absorpt_special_details     ?
_exptl_crystal_colour              violet
_exptl_crystal_colour_primary      violet
_exptl_crystal_density_diffrn      1.179
_exptl_crystal_density_meas        ?
_exptl_crystal_density_method      ?
_exptl_crystal_description         block
_exptl_crystal_F_000               1792
_exptl_crystal_size_max            0.1
_exptl_crystal_size_mid            0.08
_exptl_crystal_size_min            0.06
_exptl_transmission_factor_max     ?
_exptl_transmission_factor_min     ?
_diffrn_reflns_av_R_equivalents    0.1855
_diffrn_reflns_av_unetI/netI       0.2925
_diffrn_reflns_Laue_measured_fraction_full  1.000
_diffrn_reflns_Laue_measured_fraction_max  1.000
_diffrn_reflns_limit_h_max         13
_diffrn_reflns_limit_h_min         -13
_diffrn_reflns_limit_k_max         23
_diffrn_reflns_limit_k_min         -22
_diffrn_reflns_limit_l_max         28
_diffrn_reflns_limit_l_min         -28
_diffrn_reflns_number              42305
_diffrn_reflns_point_group_measured_fraction_full  1.000
_diffrn_reflns_point_group_measured_fraction_max  1.000
_diffrn_reflns_theta_full          25.242
_diffrn_reflns_theta_max           25.497
_diffrn_reflns_theta_min           1.335
_diffrn_ambient_temperature        296.15
_diffrn_detector_area_resol_mean   ?
_diffrn_measured_fraction_theta_full  1.000
_diffrn_measured_fraction_theta_max  1.000
_diffrn_measurement_device_type    'Bruker APEX-II CCD'
_diffrn_measurement_method         '\f and \w scans'
_diffrn_radiation_type             MoK\a
_diffrn_radiation_wavelength       0.71073
_diffrn_source                     ?
_diffrn_source_current             30.0
_diffrn_source_power               1.35
_diffrn_source_voltage             45.0
_diffrn_standards_number           0
_reflns_Friedel_coverage           0.000
_reflns_Friedel_fraction_full      .
_reflns_Friedel_fraction_max       .
_reflns_number_gt                  5659
_reflns_number_total               18055
_reflns_special_details
;
 Reflections were merged by SHELXL according to the crystal
 class for the calculation of statistics and refinement.
 
 Structure factors included contributions from the .fab file.
 
 _reflns_Friedel_fraction is defined as the number of unique
 Friedel pairs measured divided by the number that would be
 possible theoretically, ignoring centric projections and
 systematic absences.
;
_reflns_threshold_expression       'I > 2\s(I)'
_computing_cell_refinement         'SAINT v8.37A (Bruker, 2015)'
_computing_data_collection         ?
_computing_data_reduction          'SAINT v8.37A (Bruker, 2015)'
_computing_molecular_graphics      'Olex2 1.5 (Dolomanov et al., 2009)'
_computing_publication_material    'Olex2 1.5 (Dolomanov et al., 2009)'
_computing_structure_refinement    'SHELXL 2018/3 (Sheldrick, 2015)'
_computing_structure_solution      'SHELXT 2014/5 (Sheldrick, 2014)'
_refine_diff_density_max           0.743
_refine_diff_density_min           -0.405
_refine_diff_density_rms           0.089
_refine_ls_extinction_coef         .
_refine_ls_extinction_method       none
_refine_ls_goodness_of_fit_ref     0.839
_refine_ls_hydrogen_treatment      constr
_refine_ls_matrix_type             full
_refine_ls_number_parameters       969
_refine_ls_number_reflns           18055
_refine_ls_number_restraints       882
_refine_ls_R_factor_all            0.2623
_refine_ls_R_factor_gt             0.0870
_refine_ls_restrained_S_all        0.827
_refine_ls_shift/su_max            0.000
_refine_ls_shift/su_mean           0.000
_refine_ls_structure_factor_coef   Fsqd
_refine_ls_weighting_details      
 'w=1/[\s^2^(Fo^2^)+(0.0887P)^2^] where P=(Fo^2^+2Fc^2^)/3'
_refine_ls_weighting_scheme        calc
_refine_ls_wR_factor_gt            0.1925
_refine_ls_wR_factor_ref           0.2428
_refine_special_details            ?
_olex2_refinement_description
;
1. Fixed Uiso
 At 1.2 times of:
  All C(H) groups, All C(H,H) groups
 At 1.5 times of:
  All C(H,H,H) groups
2. Rigid bond restraints
 C12, C17
 with sigma for 1-2 distances of 0.01 and sigma for 1-3 distances of 0.01
 C13, C14
 with sigma for 1-2 distances of 0.01 and sigma for 1-3 distances of 0.01
 C14, C15
 with sigma for 1-2 distances of 0.01 and sigma for 1-3 distances of 0.01
 C17, C16
 with sigma for 1-2 distances of 0.01 and sigma for 1-3 distances of 0.01
3. Uiso/Uaniso restraints and constraints
C12 \\sim C13: within 2A with sigma of 0.04 and sigma for terminal atoms of
0.08 within 2A
C12 \\sim C17: within 2A with sigma of 0.04 and sigma for terminal atoms of
0.08 within 2A
C13 \\sim C14: within 2A with sigma of 0.04 and sigma for terminal atoms of
0.08 within 2A
C14 \\sim C15: within 2A with sigma of 0.04 and sigma for terminal atoms of
0.08 within 2A
C17 \\sim C16: within 2A with sigma of 0.04 and sigma for terminal atoms of
0.08 within 2A
4. Rigid body (RIGU) restrains
 All non-hydrogen atoms
 with sigma for 1-2 distances of 0.004 and sigma for 1-3 distances of 0.004
5.a Ternary CH refined with riding coordinates:
 C2(H2), C3(H3), C49(H49), C50(H50)
5.b Secondary CH2 refined with riding coordinates:
 C1(H1A,H1B), C4(H4A,H4B), C48(H48A,H48B), C51(H51A,H51B)
5.c Aromatic/amide H refined with riding coordinates:
 C6(H6), C7(H7), C8(H8), C9(H9), C10(H10), C13(H13), C14(H14), C15(H15),
 C16(H16), C17(H17), C19(H19), C20(H20), C21(H21), C22(H22), C23(H23), C25(H25),
  C26(H26), C27(H27), C28(H28), C29(H29), C31(H31), C32(H32), C33(H33),
 C34(H34), C35(H35), C37(H37), C38(H38), C39(H39), C40(H40), C41(H41), C43(H43),
  C44(H44), C45(H45), C46(H46), C47(H47), C53(H53), C54(H54), C55(H55),
 C56(H56), C57(H57), C60(H60), C61(H61), C62(H62), C63(H63), C64(H64), C66(H66),
  C67(H67), C68(H68), C69(H69), C70(H70), C72(H72), C73(H73), C74(H74),
 C75(H75), C76(H76), C78(H78), C79(H79), C80(H80), C81(H81), C82(H82), C84(H84),
  C85(H85), C86(H86), C87(H87), C88(H88), C90(H90), C91(H91), C92(H92),
 C93(H93), C94(H94)
5.d Fitted hexagon refined as free rotating group:
 C12(C13,C14,C15,C16,C17), C59(C60,C61,C62,C63,C64)
5.e Idealised Me refined as rotating group:
 C11(H11A,H11B,H11C), C58(H58A,H58B,H58C)
;
_atom_sites_solution_hydrogens     geom
_atom_sites_solution_primary       dual
_atom_sites_solution_secondary     ?
loop_
  _atom_site_label
  _atom_site_type_symbol
  _atom_site_fract_x
  _atom_site_fract_y
  _atom_site_fract_z
  _atom_site_U_iso_or_equiv
  _atom_site_adp_type
  _atom_site_occupancy
  _atom_site_site_symmetry_order
  _atom_site_calc_flag
  _atom_site_refinement_flags_posn
  _atom_site_refinement_flags_adp
  _atom_site_refinement_flags_occupancy
  _atom_site_disorder_assembly
  _atom_site_disorder_group
 Ni1 Ni 0.38532(9) 0.86583(6) 0.67541(5) 0.0475(3) Uani 1 1 d . . . . .
 Cl1 Cl 0.3425(2) 0.79258(15) 0.74691(11) 0.0795(9) Uani 1 1 d . . . . .
 Cl2 Cl 0.3976(2) 0.96152(12) 0.61706(10) 0.0598(7) Uani 1 1 d . . . . .
 P1 P 0.5672(2) 0.86633(12) 0.70812(10) 0.0453(6) Uani 1 1 d . . . . .
 P2 P 0.2213(2) 0.85912(13) 0.63002(10) 0.0511(7) Uani 1 1 d . . . . .
 Si1 Si 0.5818(2) 0.73023(15) 0.56470(12) 0.0596(8) Uani 1 1 d . . . . .
 O1 O 0.6190(6) 0.7881(4) 0.6015(3) 0.078(2) Uani 1 1 d . . . . .
 O2 O 0.4352(5) 0.7611(3) 0.5574(3) 0.0630(17) Uani 1 1 d . . . . .
 C1 C 0.6854(7) 0.8723(5) 0.6497(4) 0.050(2) Uani 1 1 d . . . . .
 H1A H 0.663743 0.919582 0.628793 0.060 Uiso 1 1 calc R U . . .
 H1B H 0.763200 0.868035 0.666460 0.060 Uiso 1 1 calc R U . . .
 C2 C 0.7040(11) 0.8187(7) 0.6083(5) 0.119(5) Uani 1 1 d . . . . .
 H2 H 0.757797 0.778797 0.630335 0.142 Uiso 1 1 calc R U . . .
 C3 C 0.3858(8) 0.8298(5) 0.5291(4) 0.068(3) Uani 1 1 d . . . . .
 H3 H 0.434576 0.862194 0.538379 0.081 Uiso 1 1 calc R U . . .
 C4 C 0.2483(7) 0.8604(5) 0.5517(4) 0.056(2) Uani 1 1 d . . . . .
 H4A H 0.196803 0.832910 0.537986 0.068 Uiso 1 1 calc R U . . .
 H4B H 0.221973 0.909505 0.534789 0.068 Uiso 1 1 calc R U . . .
 C5 C 0.7956(9) 0.8288(6) 0.5563(5) 0.070(3) Uani 1 1 d . . . . .
 C6 C 0.9076(9) 0.7801(5) 0.5494(4) 0.070(3) Uani 1 1 d . . . . .
 H6 H 0.930085 0.741623 0.577228 0.083 Uiso 1 1 calc R U . . .
 C7 C 0.9846(9) 0.7883(6) 0.5023(5) 0.076(3) Uani 1 1 d . . . . .
 H7 H 1.059537 0.754748 0.498101 0.092 Uiso 1 1 calc R U . . .
 C8 C 0.9567(12) 0.8429(7) 0.4618(5) 0.095(4) Uani 1 1 d . . . . .
 H8 H 1.014066 0.847813 0.430894 0.114 Uiso 1 1 calc R U . . .
 C9 C 0.8458(13) 0.8918(6) 0.4645(5) 0.101(4) Uani 1 1 d . . . . .
 H9 H 0.825639 0.928955 0.435395 0.121 Uiso 1 1 calc R U . . .
 C10 C 0.7635(10) 0.8843(6) 0.5124(5) 0.084(3) Uani 1 1 d . . . . .
 H10 H 0.686778 0.916483 0.515115 0.101 Uiso 1 1 calc R U . . .
 C11 C 0.6706(9) 0.7197(6) 0.4922(4) 0.092(4) Uani 1 1 d . . . . .
 H11A H 0.636414 0.690498 0.470811 0.138 Uiso 1 1 calc R U . . .
 H11B H 0.755735 0.697138 0.497723 0.138 Uiso 1 1 calc R U . . .
 H11C H 0.664722 0.766017 0.471195 0.138 Uiso 1 1 calc R U . . .
 C12 C 0.6100(8) 0.6427(4) 0.6089(4) 0.084(3) Uani 1 1 d G U . . .
 C13 C 0.5186(7) 0.6229(5) 0.6474(4) 0.131(5) Uani 1 1 d G U . . .
 H13 H 0.440015 0.653173 0.650256 0.157 Uiso 1 1 calc R U . . .
 C14 C 0.5446(10) 0.5579(6) 0.6817(4) 0.203(8) Uani 1 1 d G U . . .
 H14 H 0.483492 0.544721 0.707422 0.243 Uiso 1 1 calc R U . . .
 C15 C 0.6621(12) 0.5127(5) 0.6774(5) 0.201(8) Uani 1 1 d G U . . .
 H15 H 0.679502 0.469259 0.700355 0.241 Uiso 1 1 calc R U . . .
 C16 C 0.7535(8) 0.5325(5) 0.6390(6) 0.243(10) Uani 1 1 d G U . . .
 H16 H 0.832037 0.502246 0.636121 0.291 Uiso 1 1 calc R U . . .
 C17 C 0.7274(8) 0.5975(6) 0.6047(5) 0.188(7) Uani 1 1 d G U . . .
 H17 H 0.788562 0.610697 0.578954 0.225 Uiso 1 1 calc R U . . .
 C18 C 0.3966(8) 0.8292(5) 0.4629(4) 0.059(2) Uani 1 1 d . . . . .
 C19 C 0.4452(9) 0.8812(5) 0.4271(5) 0.067(3) Uani 1 1 d . . . . .
 H19 H 0.471466 0.916147 0.443424 0.080 Uiso 1 1 calc R U . . .
 C20 C 0.4537(9) 0.8803(6) 0.3687(5) 0.082(3) Uani 1 1 d . . . . .
 H20 H 0.484321 0.915017 0.344875 0.098 Uiso 1 1 calc R U . . .
 C21 C 0.4167(10) 0.8275(6) 0.3453(5) 0.083(3) Uani 1 1 d . . . . .
 H21 H 0.422439 0.827109 0.305385 0.099 Uiso 1 1 calc R U . . .
 C22 C 0.3721(10) 0.7761(6) 0.3788(5) 0.089(3) Uani 1 1 d . . . . .
 H22 H 0.349986 0.740340 0.361716 0.107 Uiso 1 1 calc R U . . .
 C23 C 0.3591(9) 0.7764(6) 0.4381(5) 0.075(3) Uani 1 1 d . . . . .
 H23 H 0.326100 0.742046 0.461127 0.090 Uiso 1 1 calc R U . . .
 C24 C 0.5580(8) 0.9451(4) 0.7454(4) 0.049(2) Uani 1 1 d . . . . .
 C25 C 0.4498(9) 0.9746(6) 0.7765(5) 0.081(3) Uani 1 1 d . . . . .
 H25 H 0.380231 0.956404 0.775872 0.097 Uiso 1 1 calc R U . . .
 C26 C 0.4453(10) 1.0301(7) 0.8078(5) 0.103(4) Uani 1 1 d . . . . .
 H26 H 0.372879 1.046897 0.830153 0.124 Uiso 1 1 calc R U . . .
 C27 C 0.5387(10) 1.0623(6) 0.8086(5) 0.085(3) Uani 1 1 d . . . . .
 H27 H 0.529594 1.102267 0.828694 0.102 Uiso 1 1 calc R U . . .
 C28 C 0.6468(9) 1.0343(5) 0.7789(4) 0.069(3) Uani 1 1 d . . . . .
 H28 H 0.714477 1.054021 0.779858 0.083 Uiso 1 1 calc R U . . .
 C29 C 0.6570(8) 0.9770(5) 0.7472(4) 0.056(2) Uani 1 1 d . . . . .
 H29 H 0.731346 0.959137 0.726595 0.067 Uiso 1 1 calc R U . . .
 C30 C 0.6418(7) 0.7915(5) 0.7571(4) 0.047(2) Uani 1 1 d . . . . .
 C31 C 0.6501(8) 0.7223(5) 0.7452(4) 0.065(3) Uani 1 1 d . . . . .
 H31 H 0.611503 0.714679 0.713792 0.077 Uiso 1 1 calc R U . . .
 C32 C 0.7145(9) 0.6636(5) 0.7789(5) 0.073(3) Uani 1 1 d . . . . .
 H32 H 0.720277 0.617259 0.769735 0.088 Uiso 1 1 calc R U . . .
 C33 C 0.7690(9) 0.6747(5) 0.8254(4) 0.070(3) Uani 1 1 d . . . . .
 H33 H 0.810837 0.635412 0.848496 0.084 Uiso 1 1 calc R U . . .
 C34 C 0.7636(8) 0.7414(5) 0.8387(4) 0.064(3) Uani 1 1 d . . . . .
 H34 H 0.802450 0.748299 0.870311 0.077 Uiso 1 1 calc R U . . .
 C35 C 0.6983(8) 0.8005(5) 0.8041(4) 0.057(2) Uani 1 1 d . . . . .
 H35 H 0.693469 0.846614 0.813427 0.068 Uiso 1 1 calc R U . . .
 C36 C 0.0920(7) 0.9348(5) 0.6375(4) 0.051(2) Uani 1 1 d . . . . .
 C37 C -0.0063(8) 0.9488(5) 0.6036(4) 0.065(3) Uani 1 1 d . . . . .
 H37 H -0.005219 0.918253 0.575552 0.079 Uiso 1 1 calc R U . . .
 C38 C -0.1092(9) 1.0077(6) 0.6095(5) 0.081(3) Uani 1 1 d . . . . .
 H38 H -0.173655 1.016736 0.585233 0.098 Uiso 1 1 calc R U . . .
 C39 C -0.1104(9) 1.0496(6) 0.6509(5) 0.078(3) Uani 1 1 d . . . . .
 H39 H -0.177859 1.088148 0.655743 0.093 Uiso 1 1 calc R U . . .
 C40 C -0.0160(9) 1.0382(6) 0.6868(5) 0.083(3) Uani 1 1 d . . . . .
 H40 H -0.020945 1.068674 0.715441 0.099 Uiso 1 1 calc R U . . .
 C41 C 0.0887(9) 0.9808(5) 0.6807(4) 0.073(3) Uani 1 1 d . . . . .
 H41 H 0.153659 0.973402 0.704419 0.088 Uiso 1 1 calc R U . . .
 C42 C 0.1497(7) 0.7843(5) 0.6506(4) 0.052(2) Uani 1 1 d . . . . .
 C43 C 0.0501(8) 0.7884(5) 0.6913(4) 0.063(3) Uani 1 1 d . . . . .
 H43 H 0.019471 0.830956 0.708380 0.076 Uiso 1 1 calc R U . . .
 C44 C -0.0074(9) 0.7301(6) 0.7080(5) 0.077(3) Uani 1 1 d . . . . .
 H44 H -0.074660 0.733814 0.735152 0.092 Uiso 1 1 calc R U . . .
 C45 C 0.0422(10) 0.6680(6) 0.6817(5) 0.083(3) Uani 1 1 d . . . . .
 H45 H 0.005771 0.629400 0.691305 0.100 Uiso 1 1 calc R U . . .
 C46 C 0.1404(9) 0.6604(6) 0.6431(5) 0.086(4) Uani 1 1 d . . . . .
 H46 H 0.172339 0.617164 0.627152 0.104 Uiso 1 1 calc R U . . .
 C47 C 0.1931(8) 0.7186(5) 0.6275(5) 0.071(3) Uani 1 1 d . . . . .
 H47 H 0.260408 0.713526 0.600363 0.086 Uiso 1 1 calc R U . . .
 Ni2 Ni 0.23943(9) 0.26124(6) 0.95223(5) 0.0451(3) Uani 1 1 d . . . . .
 Cl3 Cl 0.15590(19) 0.34234(11) 1.01082(10) 0.0509(6) Uani 1 1 d . . . . .
 Cl4 Cl 0.3416(2) 0.16797(14) 0.91233(14) 0.0829(9) Uani 1 1 d . . . . .
 P3 P 0.3982(2) 0.31300(12) 0.93384(10) 0.0447(6) Uani 1 1 d . . . . .
 P4 P 0.0653(2) 0.22102(12) 0.96473(10) 0.0453(6) Uani 1 1 d . . . . .
 Si2 Si 0.0947(2) 0.38228(15) 0.81501(12) 0.0565(7) Uani 1 1 d . . . . .
 O3 O 0.2225(5) 0.3925(3) 0.8375(3) 0.0625(17) Uani 1 1 d . . . . .
 O4 O 0.0309(6) 0.3439(3) 0.8717(3) 0.084(2) Uani 1 1 d . . . . .
 C48 C 0.3486(7) 0.4088(4) 0.9101(4) 0.046(2) Uani 1 1 d . . . . .
 H48A H 0.343529 0.435095 0.943569 0.055 Uiso 1 1 calc R U . . .
 H48B H 0.413205 0.421635 0.883269 0.055 Uiso 1 1 calc R U . . .
 C49 C 0.2272(9) 0.4357(5) 0.8816(5) 0.070(3) Uani 1 1 d . . . . .
 H49 H 0.160572 0.430445 0.911081 0.084 Uiso 1 1 calc R U . . .
 C50 C -0.0699(10) 0.3399(8) 0.9006(6) 0.150(7) Uani 1 1 d . . . . .
 H50 H -0.095313 0.310184 0.875023 0.180 Uiso 1 1 calc R U . . .
 C51 C -0.0752(7) 0.2924(4) 0.9519(4) 0.051(2) Uani 1 1 d . . . . .
 H51A H -0.143508 0.270057 0.950552 0.061 Uiso 1 1 calc R U . . .
 H51B H -0.093456 0.320680 0.984739 0.061 Uiso 1 1 calc R U . . .
 C52 C 0.2062(9) 0.5145(5) 0.8601(4) 0.057(2) Uani 1 1 d . . . . .
 C53 C 0.1193(8) 0.5643(5) 0.8904(4) 0.064(3) Uani 1 1 d . . . . .
 H53 H 0.075280 0.549089 0.923278 0.077 Uiso 1 1 calc R U . . .
 C54 C 0.0990(9) 0.6354(6) 0.8715(5) 0.071(3) Uani 1 1 d . . . . .
 H54 H 0.039422 0.668137 0.891476 0.086 Uiso 1 1 calc R U . . .
 C55 C 0.1624(10) 0.6592(6) 0.8253(5) 0.077(3) Uani 1 1 d . . . . .
 H55 H 0.148108 0.708073 0.813727 0.093 Uiso 1 1 calc R U . . .
 C56 C 0.2475(10) 0.6119(6) 0.7952(5) 0.073(3) Uani 1 1 d . . . . .
 H56 H 0.291086 0.628764 0.762771 0.088 Uiso 1 1 calc R U . . .
 C57 C 0.2712(9) 0.5383(5) 0.8119(4) 0.067(3) Uani 1 1 d . . . . .
 H57 H 0.329599 0.506072 0.790913 0.080 Uiso 1 1 calc R U . . .
 C58 C -0.0048(8) 0.4720(5) 0.7872(5) 0.078(3) Uani 1 1 d . . . . .
 H58A H -0.052231 0.495192 0.819093 0.117 Uiso 1 1 calc R U . . .
 H58B H -0.059782 0.464535 0.760663 0.117 Uiso 1 1 calc R U . . .
 H58C H 0.047076 0.501670 0.767878 0.117 Uiso 1 1 calc R U . . .
 C59 C 0.1328(8) 0.3190(4) 0.7579(3) 0.079(3) Uani 1 1 d G . . . .
 C60 C 0.0493(8) 0.3246(5) 0.7162(4) 0.201(9) Uani 1 1 d G . . . .
 H60 H -0.022138 0.361342 0.715697 0.241 Uiso 1 1 calc R U . . .
 C61 C 0.0726(11) 0.2753(7) 0.6753(4) 0.272(14) Uani 1 1 d G . . . .
 H61 H 0.016769 0.279026 0.647436 0.326 Uiso 1 1 calc R U . . .
 C62 C 0.1794(11) 0.2204(5) 0.6761(4) 0.196(9) Uani 1 1 d G . . . .
 H62 H 0.194984 0.187371 0.648698 0.236 Uiso 1 1 calc R U . . .
 C63 C 0.2629(7) 0.2148(4) 0.7177(4) 0.129(5) Uani 1 1 d G . . . .
 H63 H 0.334293 0.178033 0.718222 0.155 Uiso 1 1 calc R U . . .
 C64 C 0.2395(6) 0.2641(5) 0.7586(3) 0.094(4) Uani 1 1 d G . . . .
 H64 H 0.295388 0.260350 0.786484 0.113 Uiso 1 1 calc R U . . .
 C65 C -0.1798(9) 0.4033(6) 0.8928(5) 0.073(3) Uani 1 1 d . . . . .
 C66 C -0.2625(9) 0.4036(5) 0.8540(5) 0.069(3) Uani 1 1 d . . . . .
 H66 H -0.253041 0.363848 0.833487 0.083 Uiso 1 1 calc R U . . .
 C67 C -0.3577(9) 0.4602(6) 0.8446(5) 0.084(3) Uani 1 1 d . . . . .
 H67 H -0.411631 0.460724 0.816558 0.101 Uiso 1 1 calc R U . . .
 C68 C -0.3743(12) 0.5152(7) 0.8756(7) 0.111(5) Uani 1 1 d . . . . .
 H68 H -0.442478 0.553421 0.870024 0.133 Uiso 1 1 calc R U . . .
 C69 C -0.2944(16) 0.5175(7) 0.9154(7) 0.121(5) Uani 1 1 d . . . . .
 H69 H -0.307657 0.556915 0.936583 0.145 Uiso 1 1 calc R U . . .
 C70 C -0.1912(12) 0.4593(8) 0.9242(5) 0.102(4) Uani 1 1 d . . . . .
 H70 H -0.133754 0.459515 0.950381 0.122 Uiso 1 1 calc R U . . .
 C71 C 0.4825(7) 0.3101(5) 0.9974(4) 0.047(2) Uani 1 1 d . . . . .
 C72 C 0.4680(8) 0.2623(5) 1.0452(4) 0.070(3) Uani 1 1 d . . . . .
 H72 H 0.414540 0.232342 1.044503 0.085 Uiso 1 1 calc R U . . .
 C73 C 0.5324(9) 0.2582(6) 1.0943(5) 0.089(4) Uani 1 1 d . . . . .
 H73 H 0.523365 0.225464 1.125906 0.107 Uiso 1 1 calc R U . . .
 C74 C 0.6089(8) 0.3035(6) 1.0947(4) 0.079(3) Uani 1 1 d . . . . .
 H74 H 0.650617 0.302193 1.127530 0.095 Uiso 1 1 calc R U . . .
 C75 C 0.6255(8) 0.3506(6) 1.0481(5) 0.070(3) Uani 1 1 d . . . . .
 H75 H 0.678905 0.380452 1.049153 0.084 Uiso 1 1 calc R U . . .
 C76 C 0.5627(7) 0.3539(5) 0.9993(4) 0.056(2) Uani 1 1 d . . . . .
 H76 H 0.574548 0.385830 0.967509 0.067 Uiso 1 1 calc R U . . .
 C77 C 0.5228(8) 0.2774(5) 0.8782(4) 0.056(2) Uani 1 1 d . . . . .
 C78 C 0.6264(9) 0.2243(5) 0.8964(5) 0.069(3) Uani 1 1 d . . . . .
 H78 H 0.633017 0.206841 0.935044 0.083 Uiso 1 1 calc R U . . .
 C79 C 0.7185(10) 0.1988(6) 0.8543(6) 0.085(3) Uani 1 1 d . . . . .
 H79 H 0.788019 0.163927 0.865152 0.102 Uiso 1 1 calc R U . . .
 C80 C 0.7093(10) 0.2235(7) 0.7986(6) 0.089(4) Uani 1 1 d . . . . .
 H80 H 0.772596 0.205849 0.771470 0.106 Uiso 1 1 calc R U . . .
 C81 C 0.6075(11) 0.2746(7) 0.7809(5) 0.096(4) Uani 1 1 d . . . . .
 H81 H 0.601590 0.291196 0.742024 0.115 Uiso 1 1 calc R U . . .
 C82 C 0.5146(9) 0.3010(6) 0.8210(4) 0.073(3) Uani 1 1 d . . . . .
 H82 H 0.445280 0.335321 0.809059 0.088 Uiso 1 1 calc R U . . .
 C83 C 0.0512(8) 0.1527(4) 0.9204(4) 0.052(2) Uani 1 1 d . . . . .
 C84 C 0.0776(9) 0.1622(5) 0.8626(4) 0.075(3) Uani 1 1 d . . . . .
 H84 H 0.102739 0.203245 0.846735 0.090 Uiso 1 1 calc R U . . .
 C85 C 0.0678(10) 0.1118(6) 0.8264(5) 0.086(3) Uani 1 1 d . . . . .
 H85 H 0.082397 0.120114 0.786597 0.103 Uiso 1 1 calc R U . . .
 C86 C 0.0365(12) 0.0501(6) 0.8500(6) 0.100(4) Uani 1 1 d . . . . .
 H86 H 0.033857 0.014582 0.826780 0.120 Uiso 1 1 calc R U . . .
 C87 C 0.0092(14) 0.0412(6) 0.9082(6) 0.125(5) Uani 1 1 d . . . . .
 H87 H -0.013526 -0.000446 0.924384 0.150 Uiso 1 1 calc R U . . .
 C88 C 0.0145(12) 0.0929(5) 0.9439(5) 0.104(4) Uani 1 1 d . . . . .
 H88 H -0.006724 0.086575 0.983332 0.125 Uiso 1 1 calc R U . . .
 C89 C 0.0447(9) 0.1817(4) 1.0391(4) 0.055(2) Uani 1 1 d . . . . .
 C90 C -0.0641(11) 0.1907(5) 1.0717(5) 0.087(3) Uani 1 1 d . . . . .
 H90 H -0.136522 0.217741 1.056147 0.104 Uiso 1 1 calc R U . . .
 C91 C -0.0672(15) 0.1585(6) 1.1302(6) 0.115(5) Uani 1 1 d . . . . .
 H91 H -0.139903 0.166347 1.154019 0.139 Uiso 1 1 calc R U . . .
 C92 C 0.0403(16) 0.1157(7) 1.1497(6) 0.113(5) Uani 1 1 d . . . . .
 H92 H 0.039610 0.093953 1.187400 0.135 Uiso 1 1 calc R U . . .
 C93 C 0.1479(14) 0.1039(7) 1.1163(6) 0.116(5) Uani 1 1 d . . . . .
 H93 H 0.219147 0.074035 1.130796 0.140 Uiso 1 1 calc R U . . .
 C94 C 0.1507(10) 0.1363(5) 1.0614(5) 0.082(3) Uani 1 1 d . . . . .
 H94 H 0.224384 0.127961 1.038337 0.098 Uiso 1 1 calc R U . . .

loop_
  _atom_site_aniso_label
  _atom_site_aniso_U_11
  _atom_site_aniso_U_22
  _atom_site_aniso_U_33
  _atom_site_aniso_U_23
  _atom_site_aniso_U_13
  _atom_site_aniso_U_12
 Ni1 0.0390(7) 0.0621(8) 0.0427(8) 0.0008(6) -0.0049(5) -0.0160(6)
 Cl1 0.0641(17) 0.122(2) 0.0600(18) 0.0310(16) -0.0169(13) -0.0507(16)
 Cl2 0.0515(14) 0.0683(16) 0.0595(17) 0.0094(12) -0.0105(12) -0.0188(12)
 P1 0.0397(13) 0.0561(15) 0.0402(15) -0.0003(12) -0.0031(11) -0.0134(12)
 P2 0.0401(14) 0.0706(17) 0.0432(16) 0.0019(13) -0.0047(11) -0.0173(13)
 Si1 0.0507(17) 0.0682(19) 0.063(2) -0.0137(15) -0.0104(14) -0.0132(14)
 O1 0.087(5) 0.107(5) 0.061(5) -0.021(4) 0.002(4) -0.061(4)
 O2 0.047(3) 0.087(4) 0.054(4) 0.007(3) -0.009(3) -0.020(3)
 C1 0.043(5) 0.067(6) 0.043(5) -0.002(4) 0.006(4) -0.021(5)
 C2 0.111(9) 0.178(12) 0.107(9) -0.088(8) 0.070(7) -0.106(9)
 C3 0.061(6) 0.089(7) 0.053(5) -0.010(5) 0.004(5) -0.018(5)
 C4 0.047(5) 0.065(6) 0.059(6) 0.007(5) -0.012(4) -0.020(4)
 C5 0.064(6) 0.097(8) 0.060(6) -0.030(5) 0.014(5) -0.037(5)
 C6 0.074(6) 0.083(7) 0.055(7) -0.009(5) 0.000(5) -0.025(5)
 C7 0.054(6) 0.108(9) 0.068(8) -0.014(6) 0.007(5) -0.021(6)
 C8 0.104(9) 0.107(10) 0.078(9) -0.008(6) 0.020(7) -0.043(6)
 C9 0.148(11) 0.086(9) 0.066(8) 0.008(7) -0.018(7) -0.025(7)
 C10 0.058(7) 0.103(9) 0.091(8) -0.027(6) -0.022(5) -0.001(6)
 C11 0.075(7) 0.138(10) 0.075(8) -0.035(7) 0.006(6) -0.040(7)
 C12 0.091(7) 0.072(7) 0.090(8) -0.023(6) -0.003(6) -0.015(5)
 C13 0.101(9) 0.129(10) 0.144(13) 0.034(8) 0.003(8) -0.015(8)
 C14 0.208(15) 0.160(14) 0.191(16) 0.077(12) 0.011(14) -0.004(11)
 C15 0.260(18) 0.126(13) 0.159(16) 0.055(11) 0.015(15) 0.021(11)
 C16 0.249(17) 0.139(14) 0.26(2) 0.060(12) 0.064(16) 0.043(13)
 C17 0.150(11) 0.120(11) 0.230(17) 0.042(10) 0.034(12) 0.045(9)
 C18 0.048(6) 0.078(6) 0.045(5) 0.000(4) -0.016(4) 0.000(5)
 C19 0.072(7) 0.065(6) 0.064(6) -0.004(5) -0.011(5) -0.016(5)
 C20 0.076(7) 0.099(8) 0.067(6) 0.003(6) -0.003(6) -0.018(6)
 C21 0.102(9) 0.106(9) 0.037(6) -0.007(5) 0.002(6) -0.021(7)
 C22 0.109(9) 0.098(8) 0.061(6) 0.002(6) -0.015(6) -0.026(7)
 C23 0.085(7) 0.090(7) 0.058(6) 0.004(5) -0.006(6) -0.039(6)
 C24 0.045(5) 0.056(5) 0.045(6) 0.000(4) -0.007(4) -0.014(4)
 C25 0.056(6) 0.101(8) 0.097(9) -0.047(7) 0.011(5) -0.028(6)
 C26 0.081(8) 0.129(10) 0.109(11) -0.072(8) 0.029(7) -0.028(7)
 C27 0.089(7) 0.073(7) 0.095(9) -0.030(6) -0.003(6) -0.016(6)
 C28 0.078(6) 0.067(7) 0.069(8) -0.011(5) -0.014(5) -0.026(6)
 C29 0.054(5) 0.062(6) 0.054(6) -0.007(4) -0.008(5) -0.016(5)
 C30 0.037(5) 0.061(5) 0.044(5) 0.005(4) -0.001(4) -0.020(4)
 C31 0.070(7) 0.067(5) 0.058(7) -0.009(5) -0.013(5) -0.014(5)
 C32 0.080(7) 0.056(6) 0.087(8) 0.005(5) -0.020(6) -0.024(5)
 C33 0.080(7) 0.064(5) 0.067(7) 0.022(5) -0.008(5) -0.031(6)
 C34 0.072(7) 0.076(6) 0.048(6) 0.005(5) -0.021(5) -0.026(5)
 C35 0.057(6) 0.060(5) 0.056(6) 0.000(4) -0.016(4) -0.016(5)
 C36 0.033(5) 0.059(5) 0.059(6) 0.006(4) -0.006(4) -0.014(4)
 C37 0.045(5) 0.085(7) 0.068(7) 0.001(5) -0.011(4) -0.019(5)
 C38 0.050(6) 0.094(8) 0.097(9) 0.012(6) -0.021(6) -0.015(5)
 C39 0.055(6) 0.070(7) 0.102(9) 0.014(5) -0.005(6) -0.013(6)
 C40 0.067(7) 0.093(8) 0.087(9) -0.023(7) 0.002(5) -0.011(5)
 C41 0.060(6) 0.092(7) 0.067(7) -0.014(5) -0.006(5) -0.013(5)
 C42 0.038(5) 0.070(5) 0.052(6) 0.003(4) -0.009(4) -0.019(4)
 C43 0.057(6) 0.085(6) 0.051(6) 0.001(5) -0.011(4) -0.022(5)
 C44 0.055(7) 0.107(7) 0.068(8) 0.032(6) -0.016(5) -0.030(6)
 C45 0.061(7) 0.084(7) 0.109(10) 0.028(6) -0.028(5) -0.033(6)
 C46 0.062(7) 0.074(7) 0.132(11) -0.007(7) -0.011(6) -0.031(6)
 C47 0.049(6) 0.083(6) 0.089(8) -0.014(6) 0.003(5) -0.028(5)
 Ni2 0.0398(7) 0.0478(7) 0.0503(8) -0.0079(6) -0.0034(5) -0.0139(5)
 Cl3 0.0513(14) 0.0544(14) 0.0491(15) -0.0084(11) -0.0022(11) -0.0152(11)
 Cl4 0.0599(17) 0.0720(18) 0.123(3) -0.0441(17) 0.0177(16) -0.0208(14)
 P3 0.0402(13) 0.0571(15) 0.0418(15) -0.0086(12) -0.0038(11) -0.0188(12)
 P4 0.0453(14) 0.0486(14) 0.0456(16) -0.0043(12) -0.0023(11) -0.0183(12)
 Si2 0.0523(17) 0.0750(19) 0.0476(18) -0.0009(14) -0.0092(13) -0.0252(15)
 O3 0.052(4) 0.063(4) 0.074(5) -0.014(3) -0.019(3) -0.008(3)
 O4 0.059(4) 0.077(5) 0.099(6) 0.021(4) 0.021(4) -0.009(4)
 C48 0.054(5) 0.052(5) 0.039(5) 0.000(4) -0.005(4) -0.030(4)
 C49 0.079(7) 0.067(5) 0.070(7) 0.002(5) -0.030(5) -0.021(5)
 C50 0.059(6) 0.187(12) 0.131(12) 0.103(9) 0.036(7) 0.037(7)
 C51 0.041(5) 0.037(5) 0.071(6) -0.001(4) 0.002(4) -0.009(4)
 C52 0.066(6) 0.056(5) 0.054(6) 0.003(4) -0.024(4) -0.024(4)
 C53 0.057(6) 0.084(6) 0.058(7) -0.010(5) -0.009(5) -0.024(5)
 C54 0.058(6) 0.078(6) 0.081(8) -0.018(6) -0.020(5) -0.010(5)
 C55 0.082(8) 0.059(6) 0.089(9) 0.010(5) -0.031(5) -0.012(5)
 C56 0.083(8) 0.079(6) 0.063(7) 0.010(5) -0.018(5) -0.031(6)
 C57 0.068(7) 0.066(5) 0.058(7) -0.007(5) -0.003(5) 0.000(5)
 C58 0.069(7) 0.078(7) 0.084(8) 0.014(6) -0.019(6) -0.015(6)
 C59 0.079(7) 0.087(7) 0.075(7) -0.011(6) -0.010(5) -0.025(5)
 C60 0.222(17) 0.220(17) 0.169(16) -0.113(13) -0.121(13) 0.018(13)
 C61 0.38(3) 0.22(2) 0.20(2) -0.118(16) -0.19(2) 0.072(17)
 C62 0.28(2) 0.181(17) 0.131(15) -0.078(13) -0.064(13) -0.006(13)
 C63 0.123(11) 0.153(12) 0.119(12) -0.065(9) 0.024(8) -0.035(9)
 C64 0.062(7) 0.122(9) 0.109(10) -0.052(7) -0.003(6) -0.024(6)
 C65 0.044(5) 0.089(7) 0.078(8) 0.015(5) 0.000(5) -0.014(5)
 C66 0.064(7) 0.058(6) 0.082(8) -0.002(5) -0.006(5) -0.010(5)
 C67 0.051(6) 0.089(8) 0.103(10) 0.032(6) -0.010(6) -0.016(5)
 C68 0.077(9) 0.072(8) 0.145(14) 0.022(7) 0.047(7) 0.017(7)
 C69 0.172(14) 0.073(8) 0.126(13) -0.040(9) 0.058(9) -0.055(7)
 C70 0.113(10) 0.132(10) 0.080(9) 0.000(7) 0.005(7) -0.075(7)
 C71 0.034(5) 0.067(6) 0.042(5) -0.015(4) -0.006(4) -0.012(4)
 C72 0.048(6) 0.096(8) 0.067(7) 0.010(5) -0.010(5) -0.023(5)
 C73 0.057(7) 0.139(10) 0.066(7) 0.032(7) -0.027(5) -0.025(6)
 C74 0.045(6) 0.147(10) 0.042(6) -0.016(6) -0.002(5) -0.016(6)
 C75 0.054(6) 0.104(8) 0.065(6) -0.030(5) -0.013(5) -0.030(6)
 C76 0.042(5) 0.078(6) 0.053(6) -0.018(5) -0.012(4) -0.016(5)
 C77 0.056(5) 0.072(6) 0.048(5) -0.019(5) -0.003(4) -0.027(4)
 C78 0.060(6) 0.079(7) 0.068(7) -0.012(5) 0.006(5) -0.019(5)
 C79 0.061(6) 0.087(8) 0.106(8) -0.034(7) 0.022(6) -0.016(6)
 C80 0.071(7) 0.114(10) 0.090(7) -0.060(7) 0.031(7) -0.028(6)
 C81 0.091(8) 0.134(11) 0.069(8) -0.041(7) 0.016(6) -0.034(7)
 C82 0.066(6) 0.111(8) 0.048(5) -0.019(5) -0.009(5) -0.025(6)
 C83 0.055(6) 0.050(5) 0.055(5) -0.005(4) -0.003(5) -0.023(4)
 C84 0.115(8) 0.072(7) 0.057(6) -0.016(5) 0.018(6) -0.063(6)
 C85 0.121(9) 0.095(8) 0.055(7) -0.020(5) 0.016(6) -0.057(7)
 C86 0.154(11) 0.068(7) 0.091(7) -0.013(6) -0.017(8) -0.045(7)
 C87 0.241(16) 0.079(8) 0.082(8) 0.011(6) -0.034(10) -0.087(10)
 C88 0.190(13) 0.067(7) 0.076(8) -0.003(5) -0.008(8) -0.069(8)
 C89 0.090(6) 0.038(5) 0.042(5) -0.004(4) -0.004(4) -0.026(5)
 C90 0.107(8) 0.069(7) 0.074(8) -0.008(6) 0.023(6) -0.014(6)
 C91 0.204(13) 0.062(9) 0.079(8) -0.027(6) 0.051(8) -0.044(8)
 C92 0.231(15) 0.078(9) 0.063(8) 0.001(7) -0.028(8) -0.097(10)
 C93 0.176(12) 0.108(10) 0.092(10) 0.030(8) -0.059(8) -0.085(10)
 C94 0.099(7) 0.075(7) 0.083(8) 0.018(6) -0.037(6) -0.042(6)

_geom_special_details
;
 All esds (except the esd in the dihedral angle between two l.s. planes)
 are estimated using the full covariance matrix.  The cell esds are taken
 into account individually in the estimation of esds in distances, angles
 and torsion angles; correlations between esds in cell parameters are only
 used when they are defined by crystal symmetry.  An approximate (isotropic)
 treatment of cell esds is used for estimating esds involving l.s. planes.
;
loop_
  _geom_bond_atom_site_label_1
  _geom_bond_atom_site_label_2
  _geom_bond_distance
  _geom_bond_site_symmetry_2
  _geom_bond_publ_flag
 Ni1 Cl1 2.156(3) . ?
 Ni1 Cl2 2.189(3) . ?
 Ni1 P1 2.243(2) . ?
 Ni1 P2 2.243(3) . ?
 P1 C1 1.821(8) . ?
 P1 C24 1.818(9) . ?
 P1 C30 1.818(9) . ?
 P2 C4 1.825(9) . ?
 P2 C36 1.800(9) . ?
 P2 C42 1.814(9) . ?
 Si1 O1 1.639(6) . ?
 Si1 O2 1.620(6) . ?
 Si1 C11 1.885(10) . ?
 Si1 C12 1.850(7) . ?
 O1 C2 1.266(10) . ?
 O2 C3 1.418(11) . ?
 C1 H1A 0.9700 . ?
 C1 H1B 0.9700 . ?
 C1 C2 1.464(12) . ?
 C2 H2 0.9800 . ?
 C2 C5 1.538(13) . ?
 C3 H3 0.9800 . ?
 C3 C4 1.569(11) . ?
 C3 C18 1.541(12) . ?
 C4 H4A 0.9700 . ?
 C4 H4B 0.9700 . ?
 C5 C6 1.379(13) . ?
 C5 C10 1.399(14) . ?
 C6 H6 0.9300 . ?
 C6 C7 1.349(12) . ?
 C7 H7 0.9300 . ?
 C7 C8 1.331(14) . ?
 C8 H8 0.9300 . ?
 C8 C9 1.365(15) . ?
 C9 H9 0.9300 . ?
 C9 C10 1.395(15) . ?
 C10 H10 0.9300 . ?
 C11 H11A 0.9600 . ?
 C11 H11B 0.9600 . ?
 C11 H11C 0.9600 . ?
 C12 C13 1.3900 . ?
 C12 C17 1.3900 . ?
 C13 H13 0.9300 . ?
 C13 C14 1.3900 . ?
 C14 H14 0.9300 . ?
 C14 C15 1.3900 . ?
 C15 H15 0.9300 . ?
 C15 C16 1.3900 . ?
 C16 H16 0.9300 . ?
 C16 C17 1.3900 . ?
 C17 H17 0.9300 . ?
 C18 C19 1.409(12) . ?
 C18 C23 1.394(12) . ?
 C19 H19 0.9300 . ?
 C19 C20 1.360(13) . ?
 C20 H20 0.9300 . ?
 C20 C21 1.375(13) . ?
 C21 H21 0.9300 . ?
 C21 C22 1.353(13) . ?
 C22 H22 0.9300 . ?
 C22 C23 1.380(13) . ?
 C23 H23 0.9300 . ?
 C24 C25 1.380(11) . ?
 C24 C29 1.398(11) . ?
 C25 H25 0.9300 . ?
 C25 C26 1.355(13) . ?
 C26 H26 0.9300 . ?
 C26 C27 1.343(13) . ?
 C27 H27 0.9300 . ?
 C27 C28 1.357(13) . ?
 C28 H28 0.9300 . ?
 C28 C29 1.378(11) . ?
 C29 H29 0.9300 . ?
 C30 C31 1.375(11) . ?
 C30 C35 1.367(11) . ?
 C31 H31 0.9300 . ?
 C31 C32 1.388(12) . ?
 C32 H32 0.9300 . ?
 C32 C33 1.358(13) . ?
 C33 H33 0.9300 . ?
 C33 C34 1.347(12) . ?
 C34 H34 0.9300 . ?
 C34 C35 1.407(12) . ?
 C35 H35 0.9300 . ?
 C36 C37 1.372(11) . ?
 C36 C41 1.411(12) . ?
 C37 H37 0.9300 . ?
 C37 C38 1.415(12) . ?
 C38 H38 0.9300 . ?
 C38 C39 1.330(14) . ?
 C39 H39 0.9300 . ?
 C39 C40 1.372(14) . ?
 C40 H40 0.9300 . ?
 C40 C41 1.412(13) . ?
 C41 H41 0.9300 . ?
 C42 C43 1.386(11) . ?
 C42 C47 1.395(12) . ?
 C43 H43 0.9300 . ?
 C43 C44 1.427(12) . ?
 C44 H44 0.9300 . ?
 C44 C45 1.381(14) . ?
 C45 H45 0.9300 . ?
 C45 C46 1.342(14) . ?
 C46 H46 0.9300 . ?
 C46 C47 1.390(12) . ?
 C47 H47 0.9300 . ?
 Ni2 Cl3 2.177(2) . ?
 Ni2 Cl4 2.145(3) . ?
 Ni2 P3 2.227(2) . ?
 Ni2 P4 2.249(2) . ?
 P3 C48 1.833(8) . ?
 P3 C71 1.823(8) . ?
 P3 C77 1.870(9) . ?
 P4 C51 1.843(8) . ?
 P4 C83 1.814(9) . ?
 P4 C89 1.830(9) . ?
 Si2 O3 1.632(6) . ?
 Si2 O4 1.631(7) . ?
 Si2 C58 1.897(9) . ?
 Si2 C59 1.864(6) . ?
 O3 C49 1.412(10) . ?
 O4 C50 1.272(11) . ?
 C48 H48A 0.9700 . ?
 C48 H48B 0.9700 . ?
 C48 C49 1.518(11) . ?
 C49 H49 0.9800 . ?
 C49 C52 1.515(12) . ?
 C50 H50 0.9800 . ?
 C50 C51 1.428(12) . ?
 C50 C65 1.516(14) . ?
 C51 H51A 0.9700 . ?
 C51 H51B 0.9700 . ?
 C52 C53 1.393(12) . ?
 C52 C57 1.376(12) . ?
 C53 H53 0.9300 . ?
 C53 C54 1.362(12) . ?
 C54 H54 0.9300 . ?
 C54 C55 1.333(13) . ?
 C55 H55 0.9300 . ?
 C55 C56 1.353(13) . ?
 C56 H56 0.9300 . ?
 C56 C57 1.397(12) . ?
 C57 H57 0.9300 . ?
 C58 H58A 0.9600 . ?
 C58 H58B 0.9600 . ?
 C58 H58C 0.9600 . ?
 C59 C60 1.3900 . ?
 C59 C64 1.3900 . ?
 C60 H60 0.9300 . ?
 C60 C61 1.3900 . ?
 C61 H61 0.9300 . ?
 C61 C62 1.3900 . ?
 C62 H62 0.9300 . ?
 C62 C63 1.3900 . ?
 C63 H63 0.9300 . ?
 C63 C64 1.3900 . ?
 C64 H64 0.9300 . ?
 C65 C66 1.356(13) . ?
 C65 C70 1.351(15) . ?
 C66 H66 0.9300 . ?
 C66 C67 1.341(13) . ?
 C67 H67 0.9300 . ?
 C67 C68 1.320(16) . ?
 C68 H68 0.9300 . ?
 C68 C69 1.363(18) . ?
 C69 H69 0.9300 . ?
 C69 C70 1.413(17) . ?
 C70 H70 0.9300 . ?
 C71 C72 1.387(12) . ?
 C71 C76 1.381(10) . ?
 C72 H72 0.9300 . ?
 C72 C73 1.397(13) . ?
 C73 H73 0.9300 . ?
 C73 C74 1.367(13) . ?
 C74 H74 0.9300 . ?
 C74 C75 1.363(13) . ?
 C75 H75 0.9300 . ?
 C75 C76 1.384(12) . ?
 C76 H76 0.9300 . ?
 C77 C78 1.410(12) . ?
 C77 C82 1.365(12) . ?
 C78 H78 0.9300 . ?
 C78 C79 1.393(12) . ?
 C79 H79 0.9300 . ?
 C79 C80 1.337(15) . ?
 C80 H80 0.9300 . ?
 C80 C81 1.374(15) . ?
 C81 H81 0.9300 . ?
 C81 C82 1.371(13) . ?
 C82 H82 0.9300 . ?
 C83 C84 1.357(12) . ?
 C83 C88 1.359(12) . ?
 C84 H84 0.9300 . ?
 C84 C85 1.392(12) . ?
 C85 H85 0.9300 . ?
 C85 C86 1.364(13) . ?
 C86 H86 0.9300 . ?
 C86 C87 1.366(15) . ?
 C87 H87 0.9300 . ?
 C87 C88 1.388(14) . ?
 C88 H88 0.9300 . ?
 C89 C90 1.356(12) . ?
 C89 C94 1.397(13) . ?
 C90 H90 0.9300 . ?
 C90 C91 1.437(15) . ?
 C91 H91 0.9300 . ?
 C91 C92 1.367(18) . ?
 C92 H92 0.9300 . ?
 C92 C93 1.355(18) . ?
 C93 H93 0.9300 . ?
 C93 C94 1.361(15) . ?
 C94 H94 0.9300 . ?

loop_
  _geom_angle_atom_site_label_1
  _geom_angle_atom_site_label_2
  _geom_angle_atom_site_label_3
  _geom_angle
  _geom_angle_site_symmetry_1
  _geom_angle_site_symmetry_3
  _geom_angle_publ_flag
 Cl1 Ni1 Cl2 164.66(12) . . ?
 Cl1 Ni1 P1 92.94(10) . . ?
 Cl1 Ni1 P2 91.86(10) . . ?
 Cl2 Ni1 P1 89.06(9) . . ?
 Cl2 Ni1 P2 88.36(10) . . ?
 P2 Ni1 P1 170.88(10) . . ?
 C1 P1 Ni1 112.2(3) . . ?
 C24 P1 Ni1 112.0(3) . . ?
 C24 P1 C1 103.4(4) . . ?
 C24 P1 C30 104.5(4) . . ?
 C30 P1 Ni1 119.4(3) . . ?
 C30 P1 C1 103.8(4) . . ?
 C4 P2 Ni1 114.3(3) . . ?
 C36 P2 Ni1 113.4(3) . . ?
 C36 P2 C4 101.9(4) . . ?
 C36 P2 C42 101.9(4) . . ?
 C42 P2 Ni1 119.3(3) . . ?
 C42 P2 C4 104.0(4) . . ?
 O1 Si1 C11 113.9(4) . . ?
 O1 Si1 C12 107.7(4) . . ?
 O2 Si1 O1 104.3(4) . . ?
 O2 Si1 C11 111.0(4) . . ?
 O2 Si1 C12 110.3(4) . . ?
 C12 Si1 C11 109.5(5) . . ?
 C2 O1 Si1 143.9(7) . . ?
 C3 O2 Si1 122.6(6) . . ?
 P1 C1 H1A 108.4 . . ?
 P1 C1 H1B 108.4 . . ?
 H1A C1 H1B 107.5 . . ?
 C2 C1 P1 115.5(6) . . ?
 C2 C1 H1A 108.4 . . ?
 C2 C1 H1B 108.4 . . ?
 O1 C2 C1 120.8(9) . . ?
 O1 C2 H2 98.5 . . ?
 O1 C2 C5 118.0(9) . . ?
 C1 C2 H2 98.5 . . ?
 C1 C2 C5 114.8(8) . . ?
 C5 C2 H2 98.5 . . ?
 O2 C3 H3 107.4 . . ?
 O2 C3 C4 111.4(7) . . ?
 O2 C3 C18 112.1(8) . . ?
 C4 C3 H3 107.4 . . ?
 C18 C3 H3 107.4 . . ?
 C18 C3 C4 110.8(8) . . ?
 P2 C4 H4A 108.5 . . ?
 P2 C4 H4B 108.5 . . ?
 C3 C4 P2 115.2(6) . . ?
 C3 C4 H4A 108.5 . . ?
 C3 C4 H4B 108.5 . . ?
 H4A C4 H4B 107.5 . . ?
 C6 C5 C2 120.8(11) . . ?
 C6 C5 C10 118.1(10) . . ?
 C10 C5 C2 120.9(11) . . ?
 C5 C6 H6 120.0 . . ?
 C7 C6 C5 119.9(11) . . ?
 C7 C6 H6 120.0 . . ?
 C6 C7 H7 119.0 . . ?
 C8 C7 C6 122.0(11) . . ?
 C8 C7 H7 119.0 . . ?
 C7 C8 H8 119.3 . . ?
 C7 C8 C9 121.4(12) . . ?
 C9 C8 H8 119.3 . . ?
 C8 C9 H9 121.1 . . ?
 C8 C9 C10 117.9(12) . . ?
 C10 C9 H9 121.1 . . ?
 C5 C10 H10 119.7 . . ?
 C9 C10 C5 120.5(11) . . ?
 C9 C10 H10 119.7 . . ?
 Si1 C11 H11A 109.5 . . ?
 Si1 C11 H11B 109.5 . . ?
 Si1 C11 H11C 109.5 . . ?
 H11A C11 H11B 109.5 . . ?
 H11A C11 H11C 109.5 . . ?
 H11B C11 H11C 109.5 . . ?
 C13 C12 Si1 121.6(6) . . ?
 C13 C12 C17 120.0 . . ?
 C17 C12 Si1 118.3(6) . . ?
 C12 C13 H13 120.0 . . ?
 C12 C13 C14 120.0 . . ?
 C14 C13 H13 120.0 . . ?
 C13 C14 H14 120.0 . . ?
 C13 C14 C15 120.0 . . ?
 C15 C14 H14 120.0 . . ?
 C14 C15 H15 120.0 . . ?
 C16 C15 C14 120.0 . . ?
 C16 C15 H15 120.0 . . ?
 C15 C16 H16 120.0 . . ?
 C15 C16 C17 120.0 . . ?
 C17 C16 H16 120.0 . . ?
 C12 C17 H17 120.0 . . ?
 C16 C17 C12 120.0 . . ?
 C16 C17 H17 120.0 . . ?
 C19 C18 C3 120.6(9) . . ?
 C23 C18 C3 119.7(9) . . ?
 C23 C18 C19 119.7(9) . . ?
 C18 C19 H19 120.0 . . ?
 C20 C19 C18 119.9(10) . . ?
 C20 C19 H19 120.0 . . ?
 C19 C20 H20 120.3 . . ?
 C19 C20 C21 119.3(11) . . ?
 C21 C20 H20 120.3 . . ?
 C20 C21 H21 119.1 . . ?
 C22 C21 C20 121.8(11) . . ?
 C22 C21 H21 119.1 . . ?
 C21 C22 H22 119.8 . . ?
 C21 C22 C23 120.5(11) . . ?
 C23 C22 H22 119.8 . . ?
 C18 C23 H23 120.6 . . ?
 C22 C23 C18 118.7(10) . . ?
 C22 C23 H23 120.6 . . ?
 C25 C24 P1 119.5(7) . . ?
 C25 C24 C29 116.5(8) . . ?
 C29 C24 P1 124.0(7) . . ?
 C24 C25 H25 120.1 . . ?
 C26 C25 C24 119.7(9) . . ?
 C26 C25 H25 120.1 . . ?
 C25 C26 H26 117.9 . . ?
 C27 C26 C25 124.3(11) . . ?
 C27 C26 H26 117.9 . . ?
 C26 C27 H27 121.3 . . ?
 C26 C27 C28 117.4(10) . . ?
 C28 C27 H27 121.3 . . ?
 C27 C28 H28 119.7 . . ?
 C27 C28 C29 120.5(10) . . ?
 C29 C28 H28 119.7 . . ?
 C24 C29 H29 119.3 . . ?
 C28 C29 C24 121.5(9) . . ?
 C28 C29 H29 119.3 . . ?
 C31 C30 P1 119.8(7) . . ?
 C35 C30 P1 122.7(7) . . ?
 C35 C30 C31 117.4(8) . . ?
 C30 C31 H31 119.1 . . ?
 C30 C31 C32 121.7(9) . . ?
 C32 C31 H31 119.1 . . ?
 C31 C32 H32 120.4 . . ?
 C33 C32 C31 119.1(10) . . ?
 C33 C32 H32 120.4 . . ?
 C32 C33 H33 119.4 . . ?
 C34 C33 C32 121.3(10) . . ?
 C34 C33 H33 119.4 . . ?
 C33 C34 H34 120.5 . . ?
 C33 C34 C35 119.0(9) . . ?
 C35 C34 H34 120.5 . . ?
 C30 C35 C34 121.4(9) . . ?
 C30 C35 H35 119.3 . . ?
 C34 C35 H35 119.3 . . ?
 C37 C36 P2 122.3(8) . . ?
 C37 C36 C41 118.1(9) . . ?
 C41 C36 P2 119.5(7) . . ?
 C36 C37 H37 118.5 . . ?
 C36 C37 C38 122.9(10) . . ?
 C38 C37 H37 118.5 . . ?
 C37 C38 H38 121.2 . . ?
 C39 C38 C37 117.5(11) . . ?
 C39 C38 H38 121.2 . . ?
 C38 C39 H39 118.7 . . ?
 C38 C39 C40 122.6(11) . . ?
 C40 C39 H39 118.7 . . ?
 C39 C40 H40 119.7 . . ?
 C39 C40 C41 120.6(11) . . ?
 C41 C40 H40 119.7 . . ?
 C36 C41 C40 118.2(10) . . ?
 C36 C41 H41 120.9 . . ?
 C40 C41 H41 120.9 . . ?
 C43 C42 P2 122.0(8) . . ?
 C43 C42 C47 115.8(9) . . ?
 C47 C42 P2 122.2(7) . . ?
 C42 C43 H43 118.6 . . ?
 C42 C43 C44 122.8(10) . . ?
 C44 C43 H43 118.6 . . ?
 C43 C44 H44 121.8 . . ?
 C45 C44 C43 116.3(10) . . ?
 C45 C44 H44 121.8 . . ?
 C44 C45 H45 118.3 . . ?
 C46 C45 C44 123.5(11) . . ?
 C46 C45 H45 118.3 . . ?
 C45 C46 H46 120.8 . . ?
 C45 C46 C47 118.4(11) . . ?
 C47 C46 H46 120.8 . . ?
 C42 C47 H47 118.5 . . ?
 C46 C47 C42 123.1(9) . . ?
 C46 C47 H47 118.5 . . ?
 Cl3 Ni2 P3 88.52(9) . . ?
 Cl3 Ni2 P4 89.07(9) . . ?
 Cl4 Ni2 Cl3 166.49(12) . . ?
 Cl4 Ni2 P3 91.18(10) . . ?
 Cl4 Ni2 P4 92.71(10) . . ?
 P3 Ni2 P4 172.93(10) . . ?
 C48 P3 Ni2 112.2(3) . . ?
 C48 P3 C77 104.3(4) . . ?
 C71 P3 Ni2 112.9(3) . . ?
 C71 P3 C48 104.2(4) . . ?
 C71 P3 C77 103.3(4) . . ?
 C77 P3 Ni2 118.5(3) . . ?
 C51 P4 Ni2 113.2(3) . . ?
 C83 P4 Ni2 118.2(3) . . ?
 C83 P4 C51 103.3(4) . . ?
 C83 P4 C89 104.6(4) . . ?
 C89 P4 Ni2 110.4(3) . . ?
 C89 P4 C51 106.2(4) . . ?
 O3 Si2 C58 110.7(4) . . ?
 O3 Si2 C59 109.4(4) . . ?
 O4 Si2 O3 103.7(4) . . ?
 O4 Si2 C58 113.3(4) . . ?
 O4 Si2 C59 108.3(4) . . ?
 C59 Si2 C58 111.1(4) . . ?
 C49 O3 Si2 124.2(6) . . ?
 C50 O4 Si2 145.7(8) . . ?
 P3 C48 H48A 107.7 . . ?
 P3 C48 H48B 107.7 . . ?
 H48A C48 H48B 107.1 . . ?
 C49 C48 P3 118.5(6) . . ?
 C49 C48 H48A 107.7 . . ?
 C49 C48 H48B 107.7 . . ?
 O3 C49 C48 110.1(8) . . ?
 O3 C49 H49 107.5 . . ?
 O3 C49 C52 112.5(8) . . ?
 C48 C49 H49 107.5 . . ?
 C52 C49 C48 111.4(7) . . ?
 C52 C49 H49 107.5 . . ?
 O4 C50 H50 96.0 . . ?
 O4 C50 C51 122.8(10) . . ?
 O4 C50 C65 117.6(10) . . ?
 C51 C50 H50 96.0 . . ?
 C51 C50 C65 116.4(9) . . ?
 C65 C50 H50 96.0 . . ?
 P4 C51 H51A 108.3 . . ?
 P4 C51 H51B 108.3 . . ?
 C50 C51 P4 116.0(7) . . ?
 C50 C51 H51A 108.3 . . ?
 C50 C51 H51B 108.3 . . ?
 H51A C51 H51B 107.4 . . ?
 C53 C52 C49 118.9(9) . . ?
 C57 C52 C49 122.0(10) . . ?
 C57 C52 C53 119.1(9) . . ?
 C52 C53 H53 120.1 . . ?
 C54 C53 C52 119.7(10) . . ?
 C54 C53 H53 120.1 . . ?
 C53 C54 H54 119.1 . . ?
 C55 C54 C53 121.7(11) . . ?
 C55 C54 H54 119.1 . . ?
 C54 C55 H55 120.1 . . ?
 C54 C55 C56 119.7(11) . . ?
 C56 C55 H55 120.1 . . ?
 C55 C56 H56 119.4 . . ?
 C55 C56 C57 121.2(10) . . ?
 C57 C56 H56 119.4 . . ?
 C52 C57 C56 118.5(10) . . ?
 C52 C57 H57 120.7 . . ?
 C56 C57 H57 120.7 . . ?
 Si2 C58 H58A 109.5 . . ?
 Si2 C58 H58B 109.5 . . ?
 Si2 C58 H58C 109.5 . . ?
 H58A C58 H58B 109.5 . . ?
 H58A C58 H58C 109.5 . . ?
 H58B C58 H58C 109.5 . . ?
 C60 C59 Si2 119.2(5) . . ?
 C60 C59 C64 120.0 . . ?
 C64 C59 Si2 120.7(5) . . ?
 C59 C60 H60 120.0 . . ?
 C61 C60 C59 120.0 . . ?
 C61 C60 H60 120.0 . . ?
 C60 C61 H61 120.0 . . ?
 C62 C61 C60 120.0 . . ?
 C62 C61 H61 120.0 . . ?
 C61 C62 H62 120.0 . . ?
 C61 C62 C63 120.0 . . ?
 C63 C62 H62 120.0 . . ?
 C62 C63 H63 120.0 . . ?
 C64 C63 C62 120.0 . . ?
 C64 C63 H63 120.0 . . ?
 C59 C64 H64 120.0 . . ?
 C63 C64 C59 120.0 . . ?
 C63 C64 H64 120.0 . . ?
 C66 C65 C50 119.9(12) . . ?
 C70 C65 C50 118.6(13) . . ?
 C70 C65 C66 121.5(11) . . ?
 C65 C66 H66 119.5 . . ?
 C67 C66 C65 121.0(11) . . ?
 C67 C66 H66 119.5 . . ?
 C66 C67 H67 120.3 . . ?
 C68 C67 C66 119.4(13) . . ?
 C68 C67 H67 120.3 . . ?
 C67 C68 H68 119.1 . . ?
 C67 C68 C69 121.9(14) . . ?
 C69 C68 H68 119.1 . . ?
 C68 C69 H69 120.4 . . ?
 C68 C69 C70 119.2(13) . . ?
 C70 C69 H69 120.4 . . ?
 C65 C70 C69 116.9(13) . . ?
 C65 C70 H70 121.5 . . ?
 C69 C70 H70 121.5 . . ?
 C72 C71 P3 119.8(7) . . ?
 C76 C71 P3 121.8(7) . . ?
 C76 C71 C72 118.4(8) . . ?
 C71 C72 H72 119.4 . . ?
 C71 C72 C73 121.1(9) . . ?
 C73 C72 H72 119.4 . . ?
 C72 C73 H73 120.8 . . ?
 C74 C73 C72 118.5(10) . . ?
 C74 C73 H73 120.8 . . ?
 C73 C74 H74 119.3 . . ?
 C75 C74 C73 121.5(10) . . ?
 C75 C74 H74 119.3 . . ?
 C74 C75 H75 120.1 . . ?
 C74 C75 C76 119.9(10) . . ?
 C76 C75 H75 120.1 . . ?
 C71 C76 C75 120.6(9) . . ?
 C71 C76 H76 119.7 . . ?
 C75 C76 H76 119.7 . . ?
 C78 C77 P3 118.5(8) . . ?
 C82 C77 P3 121.6(8) . . ?
 C82 C77 C78 120.0(9) . . ?
 C77 C78 H78 121.2 . . ?
 C79 C78 C77 117.5(11) . . ?
 C79 C78 H78 121.2 . . ?
 C78 C79 H79 119.3 . . ?
 C80 C79 C78 121.5(12) . . ?
 C80 C79 H79 119.3 . . ?
 C79 C80 H80 119.6 . . ?
 C79 C80 C81 120.9(11) . . ?
 C81 C80 H80 119.6 . . ?
 C80 C81 H81 120.2 . . ?
 C82 C81 C80 119.5(12) . . ?
 C82 C81 H81 120.2 . . ?
 C77 C82 C81 120.7(11) . . ?
 C77 C82 H82 119.7 . . ?
 C81 C82 H82 119.7 . . ?
 C84 C83 P4 118.8(7) . . ?
 C84 C83 C88 119.7(9) . . ?
 C88 C83 P4 121.5(8) . . ?
 C83 C84 H84 119.3 . . ?
 C83 C84 C85 121.4(9) . . ?
 C85 C84 H84 119.3 . . ?
 C84 C85 H85 120.4 . . ?
 C86 C85 C84 119.2(11) . . ?
 C86 C85 H85 120.4 . . ?
 C85 C86 H86 120.5 . . ?
 C85 C86 C87 119.0(11) . . ?
 C87 C86 H86 120.5 . . ?
 C86 C87 H87 119.2 . . ?
 C86 C87 C88 121.6(11) . . ?
 C88 C87 H87 119.2 . . ?
 C83 C88 C87 119.0(11) . . ?
 C83 C88 H88 120.5 . . ?
 C87 C88 H88 120.5 . . ?
 C90 C89 P4 125.3(9) . . ?
 C90 C89 C94 119.4(10) . . ?
 C94 C89 P4 115.2(8) . . ?
 C89 C90 H90 120.1 . . ?
 C89 C90 C91 119.8(12) . . ?
 C91 C90 H90 120.1 . . ?
 C90 C91 H91 121.1 . . ?
 C92 C91 C90 117.7(13) . . ?
 C92 C91 H91 121.1 . . ?
 C91 C92 H92 118.8 . . ?
 C93 C92 C91 122.5(15) . . ?
 C93 C92 H92 118.8 . . ?
 C92 C93 H93 120.3 . . ?
 C92 C93 C94 119.4(15) . . ?
 C94 C93 H93 120.3 . . ?
 C89 C94 H94 119.5 . . ?
 C93 C94 C89 121.0(12) . . ?
 C93 C94 H94 119.5 . . ?

loop_
  _geom_torsion_atom_site_label_1
  _geom_torsion_atom_site_label_2
  _geom_torsion_atom_site_label_3
  _geom_torsion_atom_site_label_4
  _geom_torsion
  _geom_torsion_site_symmetry_1
  _geom_torsion_site_symmetry_2
  _geom_torsion_site_symmetry_3
  _geom_torsion_site_symmetry_4
  _geom_torsion_publ_flag
 Ni1 P1 C1 C2 -53.2(9) . . . . ?
 Ni1 P1 C24 C25 33.2(9) . . . . ?
 Ni1 P1 C24 C29 -149.9(7) . . . . ?
 Ni1 P1 C30 C31 46.1(8) . . . . ?
 Ni1 P1 C30 C35 -138.4(6) . . . . ?
 Ni1 P2 C4 C3 27.9(7) . . . . ?
 Ni1 P2 C36 C37 165.8(6) . . . . ?
 Ni1 P2 C36 C41 -15.9(8) . . . . ?
 Ni1 P2 C42 C43 93.5(8) . . . . ?
 Ni1 P2 C42 C47 -85.0(8) . . . . ?
 P1 C1 C2 O1 23.5(17) . . . . ?
 P1 C1 C2 C5 174.6(9) . . . . ?
 P1 C24 C25 C26 175.2(9) . . . . ?
 P1 C24 C29 C28 -176.3(7) . . . . ?
 P1 C30 C31 C32 174.9(8) . . . . ?
 P1 C30 C35 C34 -175.0(7) . . . . ?
 P2 C36 C37 C38 179.3(7) . . . . ?
 P2 C36 C41 C40 -177.8(7) . . . . ?
 P2 C42 C43 C44 -180.0(7) . . . . ?
 P2 C42 C47 C46 179.3(8) . . . . ?
 Si1 O1 C2 C1 177.9(8) . . . . ?
 Si1 O1 C2 C5 28(2) . . . . ?
 Si1 O2 C3 C4 -153.7(6) . . . . ?
 Si1 O2 C3 C18 81.5(9) . . . . ?
 Si1 C12 C13 C14 -177.4(7) . . . . ?
 Si1 C12 C17 C16 177.5(7) . . . . ?
 O1 Si1 O2 C3 59.9(7) . . . . ?
 O1 Si1 C12 C13 90.1(7) . . . . ?
 O1 Si1 C12 C17 -87.3(6) . . . . ?
 O1 C2 C5 C6 -95.7(15) . . . . ?
 O1 C2 C5 C10 79.3(15) . . . . ?
 O2 Si1 O1 C2 -145.5(15) . . . . ?
 O2 Si1 C12 C13 -23.2(7) . . . . ?
 O2 Si1 C12 C17 159.4(5) . . . . ?
 O2 C3 C4 P2 51.1(9) . . . . ?
 O2 C3 C18 C19 -131.0(9) . . . . ?
 O2 C3 C18 C23 48.3(12) . . . . ?
 C1 P1 C24 C25 154.3(8) . . . . ?
 C1 P1 C24 C29 -28.8(8) . . . . ?
 C1 P1 C30 C31 -79.7(7) . . . . ?
 C1 P1 C30 C35 95.8(8) . . . . ?
 C1 C2 C5 C6 112.3(13) . . . . ?
 C1 C2 C5 C10 -72.7(15) . . . . ?
 C2 C5 C6 C7 177.4(9) . . . . ?
 C2 C5 C10 C9 -178.2(10) . . . . ?
 C3 C18 C19 C20 -179.7(9) . . . . ?
 C3 C18 C23 C22 -178.7(9) . . . . ?
 C4 P2 C36 C37 42.6(8) . . . . ?
 C4 P2 C36 C41 -139.2(7) . . . . ?
 C4 P2 C42 C43 -137.7(8) . . . . ?
 C4 P2 C42 C47 43.7(9) . . . . ?
 C4 C3 C18 C19 103.8(10) . . . . ?
 C4 C3 C18 C23 -76.9(11) . . . . ?
 C5 C6 C7 C8 0.7(17) . . . . ?
 C6 C5 C10 C9 -3.0(16) . . . . ?
 C6 C7 C8 C9 -3.0(19) . . . . ?
 C7 C8 C9 C10 2.1(19) . . . . ?
 C8 C9 C10 C5 0.9(18) . . . . ?
 C10 C5 C6 C7 2.3(15) . . . . ?
 C11 Si1 O1 C2 -24.3(17) . . . . ?
 C11 Si1 O2 C3 -63.1(8) . . . . ?
 C11 Si1 C12 C13 -145.6(6) . . . . ?
 C11 Si1 C12 C17 36.9(7) . . . . ?
 C12 Si1 O1 C2 97.3(16) . . . . ?
 C12 Si1 O2 C3 175.3(7) . . . . ?
 C12 C13 C14 C15 0.0 . . . . ?
 C13 C12 C17 C16 0.0 . . . . ?
 C13 C14 C15 C16 0.0 . . . . ?
 C14 C15 C16 C17 0.0 . . . . ?
 C15 C16 C17 C12 0.0 . . . . ?
 C17 C12 C13 C14 0.0 . . . . ?
 C18 C3 C4 P2 176.6(7) . . . . ?
 C18 C19 C20 C21 -1.2(16) . . . . ?
 C19 C18 C23 C22 0.6(15) . . . . ?
 C19 C20 C21 C22 -0.2(17) . . . . ?
 C20 C21 C22 C23 1.8(18) . . . . ?
 C21 C22 C23 C18 -2.0(17) . . . . ?
 C23 C18 C19 C20 1.0(14) . . . . ?
 C24 P1 C1 C2 -174.1(9) . . . . ?
 C24 P1 C30 C31 172.2(7) . . . . ?
 C24 P1 C30 C35 -12.3(8) . . . . ?
 C24 C25 C26 C27 4(2) . . . . ?
 C25 C24 C29 C28 0.7(14) . . . . ?
 C25 C26 C27 C28 -4(2) . . . . ?
 C26 C27 C28 C29 2.8(17) . . . . ?
 C27 C28 C29 C24 -1.1(15) . . . . ?
 C29 C24 C25 C26 -1.9(16) . . . . ?
 C30 P1 C1 C2 77.0(10) . . . . ?
 C30 P1 C24 C25 -97.4(8) . . . . ?
 C30 P1 C24 C29 79.5(8) . . . . ?
 C30 C31 C32 C33 1.2(16) . . . . ?
 C31 C30 C35 C34 0.7(13) . . . . ?
 C31 C32 C33 C34 -1.3(16) . . . . ?
 C32 C33 C34 C35 1.1(15) . . . . ?
 C33 C34 C35 C30 -0.8(14) . . . . ?
 C35 C30 C31 C32 -0.9(14) . . . . ?
 C36 P2 C4 C3 150.6(7) . . . . ?
 C36 P2 C42 C43 -32.1(9) . . . . ?
 C36 P2 C42 C47 149.3(8) . . . . ?
 C36 C37 C38 C39 -1.8(15) . . . . ?
 C37 C36 C41 C40 0.5(14) . . . . ?
 C37 C38 C39 C40 0.9(17) . . . . ?
 C38 C39 C40 C41 0.5(17) . . . . ?
 C39 C40 C41 C36 -1.3(15) . . . . ?
 C41 C36 C37 C38 1.0(14) . . . . ?
 C42 P2 C4 C3 -103.8(7) . . . . ?
 C42 P2 C36 C37 -64.7(8) . . . . ?
 C42 P2 C36 C41 113.5(8) . . . . ?
 C42 C43 C44 C45 0.5(14) . . . . ?
 C43 C42 C47 C46 0.7(15) . . . . ?
 C43 C44 C45 C46 1.1(16) . . . . ?
 C44 C45 C46 C47 -1.7(18) . . . . ?
 C45 C46 C47 C42 0.8(17) . . . . ?
 C47 C42 C43 C44 -1.4(14) . . . . ?
 Ni2 P3 C48 C49 -25.4(8) . . . . ?
 Ni2 P3 C71 C72 17.5(8) . . . . ?
 Ni2 P3 C71 C76 -163.3(6) . . . . ?
 Ni2 P3 C77 C78 -92.3(7) . . . . ?
 Ni2 P3 C77 C82 86.9(8) . . . . ?
 Ni2 P4 C51 C50 46.9(11) . . . . ?
 Ni2 P4 C83 C84 -48.6(9) . . . . ?
 Ni2 P4 C83 C88 131.7(8) . . . . ?
 Ni2 P4 C89 C90 138.6(8) . . . . ?
 Ni2 P4 C89 C94 -44.7(7) . . . . ?
 P3 C48 C49 O3 -49.4(10) . . . . ?
 P3 C48 C49 C52 -174.9(7) . . . . ?
 P3 C71 C72 C73 179.3(8) . . . . ?
 P3 C71 C76 C75 180.0(7) . . . . ?
 P3 C77 C78 C79 -179.6(7) . . . . ?
 P3 C77 C82 C81 179.5(8) . . . . ?
 P4 C83 C84 C85 -179.7(8) . . . . ?
 P4 C83 C88 C87 -177.9(10) . . . . ?
 P4 C89 C90 C91 -178.2(8) . . . . ?
 P4 C89 C94 C93 179.6(8) . . . . ?
 Si2 O3 C49 C48 154.6(6) . . . . ?
 Si2 O3 C49 C52 -80.5(10) . . . . ?
 Si2 O4 C50 C51 179.5(9) . . . . ?
 Si2 O4 C50 C65 -22(3) . . . . ?
 Si2 C59 C60 C61 -176.2(6) . . . . ?
 Si2 C59 C64 C63 176.1(6) . . . . ?
 O3 Si2 O4 C50 142.2(18) . . . . ?
 O3 Si2 C59 C60 -152.8(5) . . . . ?
 O3 Si2 C59 C64 31.0(6) . . . . ?
 O3 C49 C52 C53 130.0(9) . . . . ?
 O3 C49 C52 C57 -50.6(12) . . . . ?
 O4 Si2 O3 C49 -63.2(7) . . . . ?
 O4 Si2 C59 C60 94.7(6) . . . . ?
 O4 Si2 C59 C64 -81.4(6) . . . . ?
 O4 C50 C51 P4 -15(2) . . . . ?
 O4 C50 C65 C66 94.1(16) . . . . ?
 O4 C50 C65 C70 -84.4(17) . . . . ?
 C48 P3 C71 C72 139.5(7) . . . . ?
 C48 P3 C71 C76 -41.4(8) . . . . ?
 C48 P3 C77 C78 142.1(7) . . . . ?
 C48 P3 C77 C82 -38.7(8) . . . . ?
 C48 C49 C52 C53 -105.8(10) . . . . ?
 C48 C49 C52 C57 73.6(12) . . . . ?
 C49 C52 C53 C54 -179.9(8) . . . . ?
 C49 C52 C57 C56 -179.2(9) . . . . ?
 C50 C65 C66 C67 -177.3(9) . . . . ?
 C50 C65 C70 C69 179.6(10) . . . . ?
 C51 P4 C83 C84 77.2(8) . . . . ?
 C51 P4 C83 C88 -102.5(9) . . . . ?
 C51 P4 C89 C90 15.5(9) . . . . ?
 C51 P4 C89 C94 -167.7(7) . . . . ?
 C51 C50 C65 C66 -105.7(15) . . . . ?
 C51 C50 C65 C70 75.8(16) . . . . ?
 C52 C53 C54 C55 -1.5(15) . . . . ?
 C53 C52 C57 C56 0.1(14) . . . . ?
 C53 C54 C55 C56 1.4(16) . . . . ?
 C54 C55 C56 C57 -0.4(16) . . . . ?
 C55 C56 C57 C52 -0.3(15) . . . . ?
 C57 C52 C53 C54 0.7(14) . . . . ?
 C58 Si2 O3 C49 58.7(8) . . . . ?
 C58 Si2 O4 C50 22.1(19) . . . . ?
 C58 Si2 C59 C60 -30.3(6) . . . . ?
 C58 Si2 C59 C64 153.5(5) . . . . ?
 C59 Si2 O3 C49 -178.6(7) . . . . ?
 C59 Si2 O4 C50 -101.6(18) . . . . ?
 C59 C60 C61 C62 0.0 . . . . ?
 C60 C59 C64 C63 0.0 . . . . ?
 C60 C61 C62 C63 0.0 . . . . ?
 C61 C62 C63 C64 0.0 . . . . ?
 C62 C63 C64 C59 0.0 . . . . ?
 C64 C59 C60 C61 0.0 . . . . ?
 C65 C50 C51 P4 -173.9(10) . . . . ?
 C65 C66 C67 C68 -3.1(16) . . . . ?
 C66 C65 C70 C69 1.1(17) . . . . ?
 C66 C67 C68 C69 3(2) . . . . ?
 C67 C68 C69 C70 0(2) . . . . ?
 C68 C69 C70 C65 -1.5(19) . . . . ?
 C70 C65 C66 C67 1.1(16) . . . . ?
 C71 P3 C48 C49 -147.9(7) . . . . ?
 C71 P3 C77 C78 33.4(8) . . . . ?
 C71 P3 C77 C82 -147.4(8) . . . . ?
 C71 C72 C73 C74 1.1(16) . . . . ?
 C72 C71 C76 C75 -0.9(13) . . . . ?
 C72 C73 C74 C75 -1.6(16) . . . . ?
 C73 C74 C75 C76 0.9(16) . . . . ?
 C74 C75 C76 C71 0.4(14) . . . . ?
 C76 C71 C72 C73 0.1(14) . . . . ?
 C77 P3 C48 C49 104.1(7) . . . . ?
 C77 P3 C71 C72 -111.7(8) . . . . ?
 C77 P3 C71 C76 67.4(8) . . . . ?
 C77 C78 C79 C80 -0.3(15) . . . . ?
 C78 C77 C82 C81 -1.3(15) . . . . ?
 C78 C79 C80 C81 -0.6(18) . . . . ?
 C79 C80 C81 C82 0.5(18) . . . . ?
 C80 C81 C82 C77 0.5(16) . . . . ?
 C82 C77 C78 C79 1.2(13) . . . . ?
 C83 P4 C51 C50 -82.0(10) . . . . ?
 C83 P4 C89 C90 -93.3(9) . . . . ?
 C83 P4 C89 C94 83.4(7) . . . . ?
 C83 C84 C85 C86 -3.1(18) . . . . ?
 C84 C83 C88 C87 2.4(18) . . . . ?
 C84 C85 C86 C87 3(2) . . . . ?
 C85 C86 C87 C88 -1(2) . . . . ?
 C86 C87 C88 C83 -2(2) . . . . ?
 C88 C83 C84 C85 0.1(17) . . . . ?
 C89 P4 C51 C50 168.2(10) . . . . ?
 C89 P4 C83 C84 -171.8(8) . . . . ?
 C89 P4 C83 C88 8.4(10) . . . . ?
 C89 C90 C91 C92 -3.9(17) . . . . ?
 C90 C89 C94 C93 -3.5(15) . . . . ?
 C90 C91 C92 C93 1(2) . . . . ?
 C91 C92 C93 C94 1(2) . . . . ?
 C92 C93 C94 C89 0.4(18) . . . . ?
 C94 C89 C90 C91 5.2(15) . . . . ?

_shelx_res_file
;
TITL mo221108a_a.res in P-1
    mo221108a_sq.res
    created by SHELXL-2018/3 at 09:25:17 on 08-Jun-2023
REM Old TITL mo_221108a_0m in P-1
REM SHELXT solution in P-1
REM R1 0.244, Rweak 0.025, Alpha 0.106, Orientation as input
REM Formula found by SHELXT: C93 O5 Si2 Cl8 Ni2
CELL 0.71073 11.1845 19.316 23.3664 83.286 84.457 75.853
ZERR 4 0.0033 0.0058 0.0073 0.007 0.007 0.006
LATT 1
SFAC C H Cl Ni O P Si
UNIT 188 176 8 4 8 8 4
DELU C12 C17
SIMU C12 C13
SIMU C12 C17
SIMU C13 C14
DELU C13 C14
SIMU C14 C15
SIMU C17 C16
DELU C14 C15
RIGU
DELU C17 C16

L.S. 10 0 97
PLAN  50
SIZE 0.1 0.08 0.06
TEMP 23
CONF
BOND $H
MORE -1
ABIN
fmap 2 53
acta
OMIT 0 51
OMIT 0 0 1
OMIT -1 1 0
OMIT 0 -1 1
OMIT 6 6 27
OMIT 1 -1 11
OMIT 0 0 2
OMIT 1 0 1
REM <olex2.extras>
REM <HklSrc "%.\\mo221108a_sq.hkl">
REM </olex2.extras>

WGHT    0.088700
FVAR       0.29408
NI1   4    0.385324    0.865827    0.675413    11.00000    0.03896    0.06206 =
         0.04273    0.00076   -0.00490   -0.01600
CL1   3    0.342469    0.792579    0.746906    11.00000    0.06414    0.12223 =
         0.05996    0.03099   -0.01687   -0.05067
CL2   3    0.397624    0.961519    0.617062    11.00000    0.05146    0.06834 =
         0.05953    0.00940   -0.01055   -0.01878
P1    6    0.567174    0.866327    0.708122    11.00000    0.03972    0.05613 =
         0.04016   -0.00032   -0.00308   -0.01342
P2    6    0.221345    0.859116    0.630023    11.00000    0.04009    0.07061 =
         0.04324    0.00194   -0.00473   -0.01732
SI1   7    0.581782    0.730228    0.564702    11.00000    0.05070    0.06820 =
         0.06260   -0.01373   -0.01038   -0.01319
O1    5    0.619007    0.788106    0.601543    11.00000    0.08691    0.10693 =
         0.06090   -0.02100    0.00217   -0.06092
O2    5    0.435210    0.761062    0.557413    11.00000    0.04715    0.08721 =
         0.05444    0.00700   -0.00864   -0.01993
C1    1    0.685397    0.872319    0.649682    11.00000    0.04274    0.06667 =
         0.04287   -0.00202    0.00624   -0.02096
AFIX  23
H1A   2    0.663743    0.919582    0.628793    11.00000   -1.20000
H1B   2    0.763200    0.868035    0.666460    11.00000   -1.20000
AFIX   0
C2    1    0.704047    0.818663    0.608295    11.00000    0.11061    0.17803 =
         0.10703   -0.08759    0.06967   -0.10580
AFIX  13
H2    2    0.757797    0.778797    0.630335    11.00000   -1.20000
AFIX   0
C3    1    0.385753    0.829750    0.529066    11.00000    0.06108    0.08869 =
         0.05266   -0.01041    0.00363   -0.01798
AFIX  13
H3    2    0.434576    0.862194    0.538379    11.00000   -1.20000
AFIX   0
C4    1    0.248343    0.860385    0.551664    11.00000    0.04653    0.06543 =
         0.05919    0.00707   -0.01184   -0.02039
AFIX  23
H4A   2    0.196803    0.832910    0.537986    11.00000   -1.20000
H4B   2    0.221973    0.909505    0.534789    11.00000   -1.20000
AFIX   0
C5    1    0.795553    0.828753    0.556250    11.00000    0.06382    0.09714 =
         0.06032   -0.03042    0.01375   -0.03715
C6    1    0.907606    0.780082    0.549412    11.00000    0.07397    0.08286 =
         0.05488   -0.00940    0.00037   -0.02515
AFIX  43
H6    2    0.930085    0.741623    0.577228    11.00000   -1.20000
AFIX   0
C7    1    0.984637    0.788286    0.502330    11.00000    0.05409    0.10774 =
         0.06775   -0.01384    0.00702   -0.02121
AFIX  43
H7    2    1.059537    0.754748    0.498101    11.00000   -1.20000
AFIX   0
C8    1    0.956742    0.842882    0.461765    11.00000    0.10399    0.10689 =
         0.07772   -0.00759    0.02009   -0.04350
AFIX  43
H8    2    1.014066    0.847813    0.430894    11.00000   -1.20000
AFIX   0
C9    1    0.845776    0.891801    0.464506    11.00000    0.14787    0.08597 =
         0.06611    0.00830   -0.01801   -0.02521
AFIX  43
H9    2    0.825639    0.928955    0.435395    11.00000   -1.20000
AFIX   0
C10   1    0.763508    0.884304    0.512367    11.00000    0.05778    0.10320 =
         0.09069   -0.02727   -0.02201   -0.00146
AFIX  43
H10   2    0.686778    0.916483    0.515115    11.00000   -1.20000
AFIX   0
C11   1    0.670553    0.719676    0.492215    11.00000    0.07514    0.13793 =
         0.07525   -0.03540    0.00562   -0.03961
AFIX 137
H11A  2    0.636414    0.690498    0.470811    11.00000   -1.50000
H11B  2    0.755735    0.697138    0.497723    11.00000   -1.50000
H11C  2    0.664722    0.766017    0.471195    11.00000   -1.50000
AFIX  66
C12   1    0.609977    0.642688    0.608937    11.00000    0.09092    0.07207 =
         0.09045   -0.02293   -0.00296   -0.01459
C13   1    0.518589    0.622923    0.647422    11.00000    0.10064    0.12865 =
         0.14417    0.03393    0.00263   -0.01527
AFIX  43
H13   2    0.440015    0.653173    0.650256    11.00000   -1.20000
AFIX  65
C14   1    0.544637    0.557945    0.681673    11.00000    0.20792    0.15996 =
         0.19146    0.07655    0.01137   -0.00429
AFIX  43
H14   2    0.483492    0.544721    0.707422    11.00000   -1.20000
AFIX  65
C15   1    0.662074    0.512733    0.677439    11.00000    0.26019    0.12648 =
         0.15857    0.05497    0.01530    0.02090
AFIX  43
H15   2    0.679502    0.469259    0.700355    11.00000   -1.20000
AFIX  65
C16   1    0.753464    0.532497    0.638954    11.00000    0.24950    0.13924 =
         0.25722    0.05969    0.06374    0.04257
AFIX  43
H16   2    0.832037    0.502246    0.636121    11.00000   -1.20000
AFIX  65
C17   1    0.727417    0.597474    0.604703    11.00000    0.14958    0.12002 =
         0.22984    0.04209    0.03379    0.04505
AFIX  43
H17   2    0.788562    0.610697    0.578954    11.00000   -1.20000
AFIX   0
C18   1    0.396562    0.829236    0.462853    11.00000    0.04795    0.07814 =
         0.04539   -0.00047   -0.01634    0.00023
C19   1    0.445214    0.881231    0.427111    11.00000    0.07206    0.06526 =
         0.06444   -0.00416   -0.01067   -0.01606
AFIX  43
H19   2    0.471466    0.916147    0.443424    11.00000   -1.20000
AFIX   0
C20   1    0.453746    0.880307    0.368724    11.00000    0.07551    0.09935 =
         0.06678    0.00277   -0.00325   -0.01810
AFIX  43
H20   2    0.484321    0.915017    0.344875    11.00000   -1.20000
AFIX   0
C21   1    0.416684    0.827504    0.345323    11.00000    0.10206    0.10573 =
         0.03708   -0.00708    0.00234   -0.02074
AFIX  43
H21   2    0.422439    0.827109    0.305385    11.00000   -1.20000
AFIX   0
C22   1    0.372079    0.776114    0.378799    11.00000    0.10924    0.09813 =
         0.06102    0.00205   -0.01476   -0.02621
AFIX  43
H22   2    0.349986    0.740340    0.361716    11.00000   -1.20000
AFIX   0
C23   1    0.359146    0.776419    0.438103    11.00000    0.08513    0.08996 =
         0.05780    0.00442   -0.00636   -0.03904
AFIX  43
H23   2    0.326100    0.742046    0.461127    11.00000   -1.20000
AFIX   0
C24   1    0.557995    0.945122    0.745442    11.00000    0.04484    0.05633 =
         0.04518   -0.00036   -0.00704   -0.01379
C25   1    0.449788    0.974560    0.776452    11.00000    0.05645    0.10083 =
         0.09660   -0.04667    0.01068   -0.02849
AFIX  43
H25   2    0.380231    0.956404    0.775872    11.00000   -1.20000
AFIX   0
C26   1    0.445313    1.030058    0.807765    11.00000    0.08074    0.12873 =
         0.10922   -0.07215    0.02913   -0.02778
AFIX  43
H26   2    0.372879    1.046897    0.830153    11.00000   -1.20000
AFIX   0
C27   1    0.538666    1.062304    0.808560    11.00000    0.08905    0.07327 =
         0.09517   -0.03032   -0.00330   -0.01624
AFIX  43
H27   2    0.529594    1.102267    0.828694    11.00000   -1.20000
AFIX   0
C28   1    0.646757    1.034344    0.778858    11.00000    0.07758    0.06716 =
         0.06867   -0.01061   -0.01351   -0.02551
AFIX  43
H28   2    0.714477    1.054021    0.779858    11.00000   -1.20000
AFIX   0
C29   1    0.656953    0.977014    0.747225    11.00000    0.05392    0.06167 =
         0.05434   -0.00687   -0.00844   -0.01560
AFIX  43
H29   2    0.731346    0.959137    0.726595    11.00000   -1.20000
AFIX   0
C30   1    0.641759    0.791463    0.757106    11.00000    0.03693    0.06094 =
         0.04386    0.00486   -0.00091   -0.02014
C31   1    0.650076    0.722304    0.745227    11.00000    0.07047    0.06654 =
         0.05788   -0.00908   -0.01282   -0.01415
AFIX  43
H31   2    0.611503    0.714679    0.713792    11.00000   -1.20000
AFIX   0
C32   1    0.714498    0.663593    0.778900    11.00000    0.08038    0.05558 =
         0.08729    0.00490   -0.01966   -0.02370
AFIX  43
H32   2    0.720277    0.617259    0.769735    11.00000   -1.20000
AFIX   0
C33   1    0.768984    0.674666    0.825400    11.00000    0.08037    0.06417 =
         0.06724    0.02195   -0.00824   -0.03117
AFIX  43
H33   2    0.810837    0.635412    0.848496    11.00000   -1.20000
AFIX   0
C34   1    0.763603    0.741372    0.838724    11.00000    0.07237    0.07580 =
         0.04790    0.00536   -0.02059   -0.02552
AFIX  43
H34   2    0.802450    0.748299    0.870311    11.00000   -1.20000
AFIX   0
C35   1    0.698282    0.800454    0.804114    11.00000    0.05719    0.06031 =
         0.05575   -0.00041   -0.01599   -0.01586
AFIX  43
H35   2    0.693469    0.846614    0.813427    11.00000   -1.20000
AFIX   0
C36   1    0.092010    0.934817    0.637535    11.00000    0.03290    0.05897 =
         0.05928    0.00596   -0.00571   -0.01391
C37   1   -0.006273    0.948817    0.603633    11.00000    0.04485    0.08464 =
         0.06837    0.00086   -0.01131   -0.01923
AFIX  43
H37   2   -0.005219    0.918253    0.575552    11.00000   -1.20000
AFIX   0
C38   1   -0.109219    1.007696    0.609473    11.00000    0.05009    0.09404 =
         0.09696    0.01168   -0.02076   -0.01466
AFIX  43
H38   2   -0.173655    1.016736    0.585233    11.00000   -1.20000
AFIX   0
C39   1   -0.110380    1.049616    0.650914    11.00000    0.05504    0.06955 =
         0.10220    0.01376   -0.00468   -0.01294
AFIX  43
H39   2   -0.177859    1.088148    0.655743    11.00000   -1.20000
AFIX   0
C40   1   -0.015965    1.038246    0.686808    11.00000    0.06698    0.09257 =
         0.08673   -0.02264    0.00224   -0.01082
AFIX  43
H40   2   -0.020945    1.068674    0.715441    11.00000   -1.20000
AFIX   0
C41   1    0.088685    0.980777    0.680678    11.00000    0.06004    0.09172 =
         0.06740   -0.01435   -0.00602   -0.01256
AFIX  43
H41   2    0.153659    0.973402    0.704419    11.00000   -1.20000
AFIX   0
C42   1    0.149721    0.784307    0.650601    11.00000    0.03760    0.06963 =
         0.05223    0.00264   -0.00922   -0.01937
C43   1    0.050118    0.788422    0.691275    11.00000    0.05739    0.08467 =
         0.05098    0.00054   -0.01144   -0.02218
AFIX  43
H43   2    0.019471    0.830956    0.708380    11.00000   -1.20000
AFIX   0
C44   1   -0.007414    0.730146    0.708022    11.00000    0.05492    0.10662 =
         0.06786    0.03237   -0.01604   -0.03030
AFIX  43
H44   2   -0.074660    0.733814    0.735152    11.00000   -1.20000
AFIX   0
C45   1    0.042248    0.668014    0.681734    11.00000    0.06058    0.08355 =
         0.10897    0.02755   -0.02812   -0.03346
AFIX  43
H45   2    0.005771    0.629400    0.691305    11.00000   -1.20000
AFIX   0
C46   1    0.140370    0.660388    0.643100    11.00000    0.06152    0.07370 =
         0.13242   -0.00708   -0.01123   -0.03126
AFIX  43
H46   2    0.172339    0.617164    0.627152    11.00000   -1.20000
AFIX   0
C47   1    0.193070    0.718608    0.627492    11.00000    0.04923    0.08264 =
         0.08853   -0.01432    0.00313   -0.02796
AFIX  43
H47   2    0.260408    0.713526    0.600363    11.00000   -1.20000
AFIX   0

NI2   4    0.239427    0.261240    0.952229    11.00000    0.03981    0.04781 =
         0.05033   -0.00793   -0.00340   -0.01386
CL3   3    0.155900    0.342335    1.010825    11.00000    0.05128    0.05445 =
         0.04911   -0.00840   -0.00224   -0.01518
CL4   3    0.341642    0.167970    0.912334    11.00000    0.05986    0.07204 =
         0.12308   -0.04410    0.01766   -0.02083
P3    6    0.398239    0.312998    0.933839    11.00000    0.04019    0.05711 =
         0.04184   -0.00856   -0.00385   -0.01884
P4    6    0.065323    0.221017    0.964735    11.00000    0.04527    0.04861 =
         0.04563   -0.00427   -0.00229   -0.01833
SI2   7    0.094741    0.382284    0.815008    11.00000    0.05228    0.07496 =
         0.04764   -0.00095   -0.00922   -0.02523
O3    5    0.222513    0.392458    0.837533    11.00000    0.05162    0.06337 =
         0.07436   -0.01442   -0.01868   -0.00801
O4    5    0.030878    0.343898    0.871671    11.00000    0.05897    0.07709 =
         0.09929    0.02102    0.02134   -0.00945
C48   1    0.348571    0.408846    0.910129    11.00000    0.05437    0.05236 =
         0.03881    0.00027   -0.00480   -0.03016
AFIX  23
H48A  2    0.343529    0.435095    0.943569    11.00000   -1.20000
H48B  2    0.413205    0.421635    0.883269    11.00000   -1.20000
AFIX   0
C49   1    0.227215    0.435659    0.881640    11.00000    0.07894    0.06743 =
         0.06971    0.00180   -0.03016   -0.02133
AFIX  13
H49   2    0.160572    0.430445    0.911081    11.00000   -1.20000
AFIX   0
C50   1   -0.069935    0.339931    0.900590    11.00000    0.05873    0.18707 =
         0.13148    0.10302    0.03612    0.03742
AFIX  13
H50   2   -0.095313    0.310184    0.875023    11.00000   -1.20000
AFIX   0
C51   1   -0.075165    0.292403    0.951930    11.00000    0.04145    0.03664 =
         0.07142   -0.00064    0.00202   -0.00894
AFIX  23
H51A  2   -0.143508    0.270057    0.950552    11.00000   -1.20000
H51B  2   -0.093456    0.320680    0.984739    11.00000   -1.20000
AFIX   0
C52   1    0.206196    0.514463    0.860094    11.00000    0.06645    0.05647 =
         0.05394    0.00349   -0.02444   -0.02422
C53   1    0.119290    0.564285    0.890356    11.00000    0.05727    0.08412 =
         0.05775   -0.01017   -0.00932   -0.02429
AFIX  43
H53   2    0.075280    0.549089    0.923278    11.00000   -1.20000
AFIX   0
C54   1    0.099019    0.635367    0.871531    11.00000    0.05764    0.07819 =
         0.08058   -0.01818   -0.01965   -0.00967
AFIX  43
H54   2    0.039422    0.668137    0.891476    11.00000   -1.20000
AFIX   0
C55   1    0.162381    0.659188    0.825263    11.00000    0.08202    0.05856 =
         0.08914    0.00976   -0.03095   -0.01182
AFIX  43
H55   2    0.148108    0.708073    0.813727    11.00000   -1.20000
AFIX   0
C56   1    0.247526    0.611929    0.795172    11.00000    0.08250    0.07907 =
         0.06260    0.01029   -0.01847   -0.03136
AFIX  43
H56   2    0.291086    0.628764    0.762771    11.00000   -1.20000
AFIX   0
C57   1    0.271198    0.538277    0.811898    11.00000    0.06775    0.06602 =
         0.05840   -0.00698   -0.00251   -0.00018
AFIX  43
H57   2    0.329599    0.506072    0.790913    11.00000   -1.20000
AFIX   0
C58   1   -0.004845    0.471998    0.787231    11.00000    0.06903    0.07802 =
         0.08439    0.01363   -0.01923   -0.01549
AFIX 137
H58A  2   -0.052231    0.495192    0.819093    11.00000   -1.50000
H58B  2   -0.059782    0.464535    0.760663    11.00000   -1.50000
H58C  2    0.047076    0.501670    0.767878    11.00000   -1.50000
AFIX  66
C59   1    0.132767    0.319008    0.757858    11.00000    0.07890    0.08746 =
         0.07498   -0.01090   -0.01047   -0.02493
C60   1    0.049302    0.324602    0.716203    11.00000    0.22167    0.22011 =
         0.16912   -0.11299   -0.12085    0.01758
AFIX  43
H60   2   -0.022138    0.361342    0.715697    11.00000   -1.20000
AFIX  65
C61   1    0.072613    0.275283    0.675305    11.00000    0.37534    0.22331 =
         0.19990   -0.11751   -0.18602    0.07190
AFIX  43
H61   2    0.016769    0.279026    0.647436    11.00000   -1.20000
AFIX  65
C62   1    0.179388    0.220369    0.676062    11.00000    0.27783    0.18084 =
         0.13098   -0.07781   -0.06440   -0.00639
AFIX  43
H62   2    0.194984    0.187371    0.648698    11.00000   -1.20000
AFIX  65
C63   1    0.262853    0.214774    0.717716    11.00000    0.12282    0.15292 =
         0.11891   -0.06519    0.02448   -0.03461
AFIX  43
H63   2    0.334293    0.178033    0.718222    11.00000   -1.20000
AFIX  65
C64   1    0.239544    0.264093    0.758614    11.00000    0.06235    0.12205 =
         0.10932   -0.05160   -0.00310   -0.02412
AFIX  43
H64   2    0.295388    0.260350    0.786484    11.00000   -1.20000
AFIX   0
C65   1   -0.179817    0.403284    0.892823    11.00000    0.04413    0.08900 =
         0.07755    0.01452    0.00004   -0.01385
C66   1   -0.262509    0.403557    0.853969    11.00000    0.06440    0.05790 =
         0.08243   -0.00164   -0.00563   -0.01000
AFIX  43
H66   2   -0.253041    0.363848    0.833487    11.00000   -1.20000
AFIX   0
C67   1   -0.357736    0.460188    0.844612    11.00000    0.05129    0.08903 =
         0.10253    0.03233   -0.01009   -0.01614
AFIX  43
H67   2   -0.411631    0.460724    0.816558    11.00000   -1.20000
AFIX   0
C68   1   -0.374329    0.515178    0.875567    11.00000    0.07716    0.07249 =
         0.14505    0.02243    0.04705    0.01687
AFIX  43
H68   2   -0.442478    0.553421    0.870024    11.00000   -1.20000
AFIX   0
C69   1   -0.294404    0.517493    0.915426    11.00000    0.17200    0.07258 =
         0.12634   -0.03959    0.05816   -0.05531
AFIX  43
H69   2   -0.307657    0.556915    0.936583    11.00000   -1.20000
AFIX   0
C70   1   -0.191197    0.459282    0.924204    11.00000    0.11324    0.13217 =
         0.07954   -0.00032    0.00484   -0.07499
AFIX  43
H70   2   -0.133754    0.459515    0.950381    11.00000   -1.20000
AFIX   0
C71   1    0.482545    0.310120    0.997380    11.00000    0.03401    0.06706 =
         0.04230   -0.01462   -0.00585   -0.01151
C72   1    0.468033    0.262255    1.045166    11.00000    0.04810    0.09597 =
         0.06712    0.01019   -0.01042   -0.02269
AFIX  43
H72   2    0.414540    0.232342    1.044503    11.00000   -1.20000
AFIX   0
C73   1    0.532384    0.258221    1.094253    11.00000    0.05683    0.13851 =
         0.06648    0.03178   -0.02688   -0.02500
AFIX  43
H73   2    0.523365    0.225464    1.125906    11.00000   -1.20000
AFIX   0
C74   1    0.608923    0.303521    1.094709    11.00000    0.04538    0.14722 =
         0.04182   -0.01588   -0.00237   -0.01604
AFIX  43
H74   2    0.650617    0.302193    1.127530    11.00000   -1.20000
AFIX   0
C75   1    0.625481    0.350586    1.048131    11.00000    0.05440    0.10370 =
         0.06530   -0.03005   -0.01320   -0.03002
AFIX  43
H75   2    0.678905    0.380452    1.049153    11.00000   -1.20000
AFIX   0
C76   1    0.562673    0.353863    0.999312    11.00000    0.04150    0.07826 =
         0.05333   -0.01846   -0.01174   -0.01557
AFIX  43
H76   2    0.574548    0.385830    0.967509    11.00000   -1.20000
AFIX   0
C77   1    0.522829    0.277393    0.878175    11.00000    0.05585    0.07160 =
         0.04846   -0.01858   -0.00271   -0.02678
C78   1    0.626441    0.224259    0.896369    11.00000    0.05980    0.07934 =
         0.06759   -0.01194    0.00554   -0.01857
AFIX  43
H78   2    0.633017    0.206841    0.935044    11.00000   -1.20000
AFIX   0
C79   1    0.718543    0.198835    0.854285    11.00000    0.06142    0.08706 =
         0.10634   -0.03387    0.02194   -0.01608
AFIX  43
H79   2    0.788019    0.163927    0.865152    11.00000   -1.20000
AFIX   0
C80   1    0.709291    0.223510    0.798584    11.00000    0.07057    0.11405 =
         0.08995   -0.06047    0.03090   -0.02841
AFIX  43
H80   2    0.772596    0.205849    0.771470    11.00000   -1.20000
AFIX   0
C81   1    0.607466    0.274620    0.780892    11.00000    0.09098    0.13424 =
         0.06873   -0.04128    0.01585   -0.03403
AFIX  43
H81   2    0.601590    0.291196    0.742024    11.00000   -1.20000
AFIX   0
C82   1    0.514577    0.301005    0.820968    11.00000    0.06619    0.11069 =
         0.04823   -0.01910   -0.00895   -0.02536
AFIX  43
H82   2    0.445280    0.335321    0.809059    11.00000   -1.20000
AFIX   0
C83   1    0.051205    0.152721    0.920431    11.00000    0.05498    0.05001 =
         0.05524   -0.00510   -0.00290   -0.02340
C84   1    0.077583    0.162199    0.862561    11.00000    0.11475    0.07172 =
         0.05703   -0.01608    0.01815   -0.06259
AFIX  43
H84   2    0.102739    0.203245    0.846735    11.00000   -1.20000
AFIX   0
C85   1    0.067800    0.111810    0.826375    11.00000    0.12139    0.09539 =
         0.05545   -0.02040    0.01601   -0.05689
AFIX  43
H85   2    0.082397    0.120114    0.786597    11.00000   -1.20000
AFIX   0
C86   1    0.036528    0.050075    0.849982    11.00000    0.15398    0.06816 =
         0.09097   -0.01259   -0.01714   -0.04501
AFIX  43
H86   2    0.033857    0.014582    0.826780    11.00000   -1.20000
AFIX   0
C87   1    0.009199    0.041212    0.908237    11.00000    0.24064    0.07854 =
         0.08198    0.01122   -0.03351   -0.08684
AFIX  43
H87   2   -0.013526   -0.000446    0.924384    11.00000   -1.20000
AFIX   0
C88   1    0.014515    0.092853    0.943921    11.00000    0.18984    0.06668 =
         0.07579   -0.00322   -0.00842   -0.06916
AFIX  43
H88   2   -0.006724    0.086575    0.983332    11.00000   -1.20000
AFIX   0
C89   1    0.044653    0.181678    1.039092    11.00000    0.09005    0.03814 =
         0.04185   -0.00352   -0.00359   -0.02604
C90   1   -0.064148    0.190730    1.071663    11.00000    0.10727    0.06893 =
         0.07415   -0.00755    0.02271   -0.01394
AFIX  43
H90   2   -0.136522    0.217741    1.056147    11.00000   -1.20000
AFIX   0
C91   1   -0.067242    0.158454    1.130219    11.00000    0.20376    0.06240 =
         0.07935   -0.02677    0.05077   -0.04402
AFIX  43
H91   2   -0.139903    0.166347    1.154019    11.00000   -1.20000
AFIX   0
C92   1    0.040312    0.115738    1.149748    11.00000    0.23130    0.07800 =
         0.06256    0.00065   -0.02796   -0.09686
AFIX  43
H92   2    0.039610    0.093953    1.187400    11.00000   -1.20000
AFIX   0
C93   1    0.147864    0.103945    1.116331    11.00000    0.17613    0.10757 =
         0.09234    0.03027   -0.05884   -0.08478
AFIX  43
H93   2    0.219147    0.074035    1.130796    11.00000   -1.20000
AFIX   0
C94   1    0.150699    0.136254    1.061390    11.00000    0.09906    0.07468 =
         0.08302    0.01773   -0.03689   -0.04187
AFIX  43
H94   2    0.224384    0.127961    1.038337    11.00000   -1.20000
AFIX   0
HKLF 4


REM  mo221108a_a.res in P-1
REM wR2 = 0.2428, GooF = S = 0.839, Restrained GooF = 0.827 for all data
REM R1 = 0.0870 for 5659 Fo > 4sig(Fo) and 0.2623 for all 18055 data
REM 969 parameters refined using 882 restraints

END

WGHT      0.0885      0.0000

REM Highest difference peak  0.743,  deepest hole -0.405,  1-sigma level  0.089
Q1    1   0.2819  0.4448  0.6255  11.00000  0.05    0.74
Q2    1   0.6417  0.6004  0.3767  11.00000  0.05    0.72
Q3    1   0.3624  0.4197  0.6557  11.00000  0.05    0.68
Q4    1   0.3946  0.4159  0.6429  11.00000  0.05    0.66
Q5    1   0.3679  0.4746  0.6347  11.00000  0.05    0.52
Q6    1   0.3190  0.4166  0.8559  11.00000  0.05    0.44
Q7    1   0.7186  0.6194  0.3602  11.00000  0.05    0.39
Q8    1   0.6480  0.6604  0.4225  11.00000  0.05    0.35
Q9    1   0.7185  0.6833  0.5315  11.00000  0.05    0.34
Q10   1   0.6312  0.8544  0.5800  11.00000  0.05    0.33
Q11   1   0.1660  0.3374  0.8008  11.00000  0.05    0.33
Q12   1   0.3710  1.0943  0.8217  11.00000  0.05    0.33
Q13   1   0.7361  0.8129  0.6166  11.00000  0.05    0.32
Q14   1   0.5168  0.4979  0.6632  11.00000  0.05    0.32
Q15   1   0.5644  0.5408  0.6222  11.00000  0.05    0.32
Q16   1   0.4748  0.0562  1.0539  11.00000  0.05    0.31
Q17   1   0.7714  0.6250  0.5264  11.00000  0.05    0.31
Q18   1   0.5419  0.6849  0.4916  11.00000  0.05    0.31
Q19   1   0.5365  0.6382  0.6559  11.00000  0.05    0.31
Q20   1   0.5363  0.8015  0.6765  11.00000  0.05    0.31
Q21   1   0.5413  1.1520  0.8381  11.00000  0.05    0.31
Q22   1  -0.0073  0.2427  0.8411  11.00000  0.05    0.30
Q23   1   0.8407  0.9196  0.5226  11.00000  0.05    0.30
Q24   1  -0.0021  0.4020  0.9405  11.00000  0.05    0.30
Q25   1   0.3768  1.0212  0.8594  11.00000  0.05    0.30
Q26   1   1.0730  0.7194  0.5360  11.00000  0.05    0.29
Q27   1   0.7627  0.8961  0.5424  11.00000  0.05    0.29
Q28   1  -0.0147  0.0203  0.7801  11.00000  0.05    0.29
Q29   1   0.8394  0.1439  0.9380  11.00000  0.05    0.29
Q30   1   0.4179  0.2400  0.8145  11.00000  0.05    0.29
Q31   1   0.6397  0.9028  0.5396  11.00000  0.05    0.29
Q32   1   0.4994  0.5988  0.5945  11.00000  0.05    0.29
Q33   1   0.5483  0.6949  0.6212  11.00000  0.05    0.29
Q34   1   0.1389  0.3810  0.7048  11.00000  0.05    0.29
Q35   1   0.5404  0.6357  0.6050  11.00000  0.05    0.28
Q36   1   0.1419  0.2237  0.9492  11.00000  0.05    0.28
Q37   1   0.3679  0.7008  0.4589  11.00000  0.05    0.28
Q38   1   0.8377  0.6382  0.5922  11.00000  0.05    0.28
Q39   1   1.0541  0.7161  0.4871  11.00000  0.05    0.28
Q40   1   0.7366  0.7055  0.4254  11.00000  0.05    0.28
Q41   1   0.2870  0.2387  0.8047  11.00000  0.05    0.28
Q42   1   0.5467  0.0826  1.0060  11.00000  0.05    0.28
Q43   1   0.0835  0.3088  0.8769  11.00000  0.05    0.28
Q44   1   0.5965  0.5927  0.5770  11.00000  0.05    0.27
Q45   1   0.6628  0.8946  0.6215  11.00000  0.05    0.27
Q46   1   0.7662  0.6984  0.5611  11.00000  0.05    0.27
Q47   1   0.6247  0.7196  0.4983  11.00000  0.05    0.27
Q48   1   0.6965  0.3182  0.9599  11.00000  0.05    0.27
Q49   1   0.6706  0.0760  1.0166  11.00000  0.05    0.27
Q50   1   0.7040  0.0605  1.0007  11.00000  0.05    0.27
;
_shelx_res_checksum                64802
_shelx_hkl_file
;
  -1   0   0  607.34   51.99
  -1   0   0  643.54   52.29
   1   0   0  643.04   52.09
   1   0   0  606.84   52.19
  -2   0   0  183.28   21.00
   2   0   0  136.19   20.10
   2   0   0  180.08   17.10
  -3   0   0 1335.17  125.99
   3   0   0 1496.55  122.39
   3   0   0 1689.43  127.99
  -4   0   0  361.06   42.00
   4   0   0  376.96   42.60
   4   0   0  392.06   35.70
  -5   0   0  894.01   86.99
   5   0   0  922.81   88.39
   5   0   0  966.00   79.99
  -6   0   0  683.53   71.09
   6   0   0  692.33   72.79
   6   0   0  715.73   62.49
  -7   0   0  137.69   32.40
   7   0   0  162.08   22.40
   7   0   0  193.88   36.90
  -8   0   0   94.59   29.00
   8   0   0  113.79   19.60
   8   0   0  104.09   30.90
  -9   0   0   -2.50   17.90
   9   0   0   11.60   21.40
 -10   0   0  -19.00   20.50
  10   0   0    1.50   26.60
 -11   0   0    1.20   24.90
  11   0   0   36.10   29.50
 -12   0   0   45.40   32.30
  12   0   0   -4.80   27.30
 -13   0   0    1.70   29.40
  13   0   0   29.20   34.50
  14   0   0   -0.40   33.50
  14  -1   0   20.40   39.60
 -14   1   0   14.40   36.40
  13  -1   0   16.60   31.90
 -13   1   0   39.20   35.60
  12  -1   0    1.70   29.50
 -12   1   0   -5.80   27.20
  11  -1   0   66.79   31.50
 -11   1   0   73.99   34.90
  10  -1   0   90.99   34.40
 -10   1   0   38.30   28.60
   9  -1   0    4.40   21.20
  -9   1   0   11.20   22.30
   8  -1   0   21.00   19.40
  -8   1   0   44.80   21.70
   7  -1   0   34.70   19.30
   7  -1   0   -6.40    7.40
  -7   1   0   27.70   19.50
   6  -1   0   37.00   18.30
   6  -1   0   38.00   11.00
  -6   1   0   41.90   23.20
   5  -1   0  761.72   72.89
   5  -1   0  743.73   63.79
  -5   1   0  700.63   72.29
   4  -1   0    1.70    7.10
   4  -1   0    1.20   10.60
  -4   1   0  -16.30   12.70
   3  -1   0   41.90   13.00
   3  -1   0    2.80    6.10
  -3   1   0   22.10   12.80
   2  -1   0 4159.38  331.07
   2  -1   0 4055.09  334.27
  -2   1   0 4256.67  335.17
   1  -1   0  383.06   29.20
   1  -1   0  274.37   30.20
  -1   1   0  279.37   30.40
  -1   1   0  388.06   32.00
  -1   1   0  395.56   29.40
  -1  -1   0 1884.51  152.58
  -1  -1   0 1945.51  153.68
  -1  -1   0 1936.81  151.78
   1   1   0 1896.71  152.68
   1   1   0 1912.51  153.88
   1   1   0 1831.62  151.78
  -2  -1   0  136.69   16.80
  -2  -1   0  124.19   15.50
   2   1   0  118.89   19.50
   2   1   0  145.39   16.30
   2   1   0  139.39   15.90
  -3  -1   0 1855.61  158.78
   3   1   0 2063.89  161.68
   3   1   0 1884.21  156.68
  -4  -1   0  616.34   57.79
   4   1   0  618.24   53.29
   4   1   0  541.55   58.89
  -5  -1   0  109.69   24.30
   5   1   0  136.09   19.60
   5   1   0  118.29   25.10
  -6  -1   0    8.80   15.10
   6   1   0    7.80   10.10
   6   1   0   20.20   18.30
  -7  -1   0    9.80   15.50
   7   1   0    4.30   16.10
   7   1   0   -6.60    9.00
  -8  -1   0   19.70   18.20
   8   1   0   33.30   22.10
   8   1   0   17.20   10.90
  -9  -1   0    3.40   19.40
   9   1   0   11.50   23.00
 -10  -1   0   87.79   31.60
  10   1   0   56.19   31.70
 -11  -1   0  112.19   34.60
  11   1   0   52.59   34.00
 -12  -1   0    5.40   26.00
  12   1   0   17.20   29.60
 -13  -1   0  -54.09   18.80
  13   1   0   29.50   34.20
  14   1   0   28.00   35.40
 -14   2   0  -25.40   29.70
  13  -2   0    0.30   31.70
 -13   2   0   38.60   37.40
  12  -2   0   48.80   33.50
 -12   2   0   -6.90   25.20
  11  -2   0    9.00   25.20
 -11   2   0   -6.60   22.60
  10  -2   0   63.39   30.70
 -10   2   0  117.19   36.90
   9  -2   0    2.30   22.60
  -9   2   0   35.60   24.50
   8  -2   0   21.40   19.80
  -8   2   0  107.09   31.60
   7  -2   0  707.73   62.69
   7  -2   0  773.22   76.99
  -7   2   0  667.03   76.89
   6  -2   0    8.80    7.80
   6  -2   0    0.00   14.10
  -6   2   0    7.50   17.90
   5  -2   0   14.10   13.10
  -5   2   0  -13.20   13.80
   4  -2   0  349.77   41.20
  -4   2   0  422.36   46.20
   3  -2   0  146.89   25.30
   3  -2   0  220.68   20.70
  -3   2   0  218.38   21.20
  -3   2   0  205.18   28.80
   2  -2   0 2040.80  164.08
   2  -2   0 1962.10  166.68
  -2   2   0 2096.89  164.08
  -2   2   0 2030.10  168.48
   1  -2   0  217.78   23.30
   1  -2   0  328.47   24.80
  -1   2   0  284.37   24.50
  -1   2   0  206.98   25.50
  -1   2   0  216.08   23.70
   0  -2   0 5418.46  410.76
   0  -2   0 5155.08  410.96
   0  -2   0 4804.02  410.36
   0   2   0 5405.56  410.66
   0   2   0 5248.27  410.96
   0   2   0 4912.31  410.36
  -1  -2   0 1035.00   86.89
  -1  -2   0 1040.50   87.29
   1   2   0 1048.70   86.99
   1   2   0 1086.29   87.29
  -2  -2   0  724.73   64.09
  -2  -2   0  703.63   59.89
   2   2   0  762.62   62.09
   2   2   0  705.93   59.79
  -3  -2   0    6.70   12.30
  -3  -2   0   22.30   10.00
   3   2   0    4.20   11.00
   3   2   0    1.70    7.80
  -4  -2   0  372.76   40.00
   4   2   0  398.56   38.60
   4   2   0  408.66   45.30
  -5  -2   0   93.89   20.50
   5   2   0   77.89   17.20
   5   2   0  126.79   26.10
  -6  -2   0  457.85   49.90
   6   2   0  439.06   54.09
   6   2   0  485.55   46.00
  -7  -2   0  114.79   25.20
   7   2   0   94.79   18.80
   7   2   0   63.99   24.20
  -8  -2   0   13.10   17.60
   8   2   0    4.30    9.70
   8   2   0   13.20   19.30
  -9  -2   0   51.89   25.20
   9   2   0   19.90   22.70
 -10  -2   0   17.50   24.40
  10   2   0   60.49   29.90
 -11  -2   0  197.78   45.60
  11   2   0  286.77   59.09
 -12  -2   0  115.89   41.60
  12   2   0   87.99   42.40
  13   2   0   45.30   33.90
  14   2   0    1.30   32.20
  13  -3   0  -43.90   26.80
 -13   3   0   11.70   34.50
  12  -3   0   48.70   36.00
 -12   3   0   -5.40   27.10
  11  -3   0  -33.20   21.40
 -11   3   0  -26.80   22.20
  10  -3   0   -2.40   22.00
 -10   3   0   -3.30   27.10
   9  -3   0   26.00   26.00
  -9   3   0   21.80   26.60
   8  -3   0    1.50   17.60
  -8   3   0   -6.80   17.90
   7  -3   0  762.12   63.99
   7  -3   0  661.13   76.49
  -7   3   0  704.03   79.49
   6  -3   0  144.19   29.70
  -6   3   0  139.09   32.40
   5  -3   0  403.36   46.10
  -5   3   0  383.46   48.40
   4  -3   0   49.40   15.30
  -4   3   0   23.90   18.80
  -4   3   0   46.60   10.70
   3  -3   0  542.65   52.89
  -3   3   0  533.15   56.99
  -3   3   0  576.84   49.00
   2  -3   0  814.52   69.69
  -2   3   0  794.22   72.49
  -2   3   0  788.72   67.79
   1  -3   0  204.68   23.80
  -1   3   0  210.98   23.00
  -1   3   0  161.78   25.20
  -1   3   0  231.18   22.50
   0  -3   0  349.96   32.00
   0  -3   0  350.66   32.40
   0   3   0  319.67   33.10
   0   3   0  368.76   32.60
  -1  -3   0 1298.77  106.99
  -1  -3   0 1281.27  103.19
   1   3   0 1249.57  103.19
   1   3   0 1352.96  107.39
  -2  -3   0  685.83   55.29
  -2  -3   0  642.54   61.89
   2   3   0  677.53   55.19
   2   3   0  705.53   60.69
  -3  -3   0 2095.59  174.38
  -3  -3   0 2165.48  168.58
   3   3   0 2062.69  168.58
   3   3   0 1986.60  174.98
   3   3   0 2065.49  171.28
  -4  -3   0   18.30   16.80
  -4  -3   0   39.30   12.00
   4   3   0   34.70   11.40
   4   3   0   13.80   15.80
  -5  -3   0   60.59   16.60
   5   3   0  112.69   26.60
   5   3   0   86.49   17.30
  -6  -3   0   95.89   22.20
   6   3   0  199.08   35.20
   6   3   0  116.19   21.00
  -7  -3   0  112.09   23.80
   7   3   0   38.30   21.30
   7   3   0   60.89   16.60
  -8  -3   0   21.00   18.40
   8   3   0   61.29   17.60
   8   3   0   75.59   27.30
  -9  -3   0   -1.50   17.00
   9   3   0   24.30   24.60
   9   3   0  -17.30   10.90
 -10  -3   0    2.10   18.40
  10   3   0   -8.50   21.90
 -11  -3   0  -20.70   19.80
  11   3   0  -16.50   21.80
 -12  -3   0   -8.30   24.50
  12   3   0  -63.19   21.00
  13   3   0   27.90   35.40
  14   3   0   -1.60   31.10
 -13   4   0    2.60   30.30
  12  -4   0    3.20   29.70
 -12   4   0   -7.40   28.10
  11  -4   0   17.70   27.10
 -11   4   0   13.80   25.50
  10  -4   0  -18.40   19.60
 -10   4   0   61.39   30.80
   9  -4   0   25.70   23.10
  -9   4   0   68.29   33.50
   8  -4   0   76.89   28.20
  -8   4   0  124.19   35.10
   7  -4   0   62.09   23.50
  -7   4   0   45.90   25.10
   6  -4   0   36.40   16.80
  -6   4   0  -28.50   15.60
   5  -4   0   39.60   16.50
  -5   4   0   55.19   23.30
   4  -4   0   30.70   14.00
  -4   4   0   -3.50    8.90
  -4   4   0   -3.90   16.80
   3  -4   0   19.90   11.80
  -3   4   0   33.60   10.30
  -3   4   0   19.90   15.20
   2  -4   0   36.60   11.70
  -2   4   0    7.80   10.10
  -2   4   0   36.90   16.70
   1  -4   0  141.49   20.40
  -1   4   0   99.29   20.00
  -1   4   0  105.59   17.90
   0  -4   0   88.99   13.50
   0   4   0   63.39   13.70
   0   4   0   47.50   13.50
  -1  -4   0  863.81   64.29
  -1  -4   0  648.64   67.59
   1   4   0  793.02   64.39
   1   4   0  736.93   68.49
  -2  -4   0    6.10   12.50
   2   4   0   -6.40   11.20
  -3  -4   0  970.40   92.59
  -3  -4   0 1057.29   84.69
   3   4   0  947.51   89.99
   3   4   0 1069.69   84.69
   3   4   0 1082.49   94.99
  -4  -4   0  865.01   71.89
  -4  -4   0  776.32   79.39
   4   4   0 1019.80   83.69
   4   4   0  747.03   75.09
  -5  -4   0   -9.50   14.30
  -5  -4   0   -0.90    9.50
   5   4   0    6.30   16.20
   5   4   0   -4.60    8.50
  -6  -4   0   -4.50    9.60
   6   4   0    3.50   17.50
   6   4   0   -0.80   10.20
  -7  -4   0   12.30   13.40
   7   4   0  -18.40    8.00
   7   4   0    4.70   17.20
  -8  -4   0   13.60   15.00
   8   4   0   53.99   17.60
   8   4   0   25.70   20.90
  -9  -4   0    8.00   17.70
   9   4   0    3.40   19.90
   9   4   0  -21.90   11.20
 -10  -4   0   46.00   25.20
  10   4   0   44.30   29.80
 -11  -4   0  -23.50   19.90
  11   4   0    7.10   25.70
  12   4   0   29.30   28.80
  13   4   0   42.00   36.90
  14   4   0   12.00   37.90
 -13   5   0  -15.40   29.50
 -12   5   0  -26.40   24.20
  11  -5   0    9.40   25.70
 -11   5   0   -8.00   26.30
  10  -5   0    7.80   21.10
 -10   5   0   49.30   34.20
   9  -5   0   -4.00   18.40
  -9   5   0   24.80   27.20
   8  -5   0   65.49   25.50
  -8   5   0   25.20   27.20
   7  -5   0  344.47   47.40
  -7   5   0  360.26   54.99
   6  -5   0  265.87   37.90
  -6   5   0  265.87   47.70
   5  -5   0   23.90   14.30
  -5   5   0   10.90   18.90
  -5   5   0    5.70    9.50
   4  -5   0  427.16   46.70
  -4   5   0  323.87   35.30
  -4   5   0  336.67   46.30
   3  -5   0   -1.80    9.30
  -3   5   0  -11.20    9.10
  -3   5   0    1.70   14.10
   2  -5   0  265.27   32.30
  -2   5   0  243.08   33.90
  -2   5   0  266.67   30.00
   1  -5   0  172.78   21.20
  -1   5   0  115.29   21.00
  -1   5   0  125.29   22.40
   0  -5   0   11.00   10.10
   0   5   0    5.10   12.40
   0   5   0    9.00   13.70
  -1  -5   0  135.29   21.10
  -1  -5   0  143.39   16.40
   1   5   0  100.09   16.90
   1   5   0  132.19   22.50
  -2  -5   0   15.70   13.40
   2   5   0   16.30   13.60
  -3  -5   0 1976.00  167.18
   3   5   0 1958.60  165.28
  -4  -5   0   45.70   18.80
  -4  -5   0   22.00    8.30
   4   5   0   23.90   17.70
   4   5   0   32.30   15.70
   4   5   0   42.80    8.90
  -5  -5   0 1416.56  120.39
  -5  -5   0 1519.95  131.39
   5   5   0 1371.86  131.39
   5   5   0 1491.95  125.69
  -6  -5   0  184.78   22.60
   6   5   0  100.99   23.00
   6   5   0  142.99   30.10
  -7  -5   0   91.09   20.00
   7   5   0   56.69   26.60
   7   5   0  113.19   23.10
  -8  -5   0    0.40   12.50
   8   5   0   13.20   12.40
   8   5   0    0.50   19.00
  -9  -5   0   -3.70   15.20
   9   5   0    1.40   20.40
   9   5   0    2.40   14.40
 -10  -5   0   41.30   24.00
  10   5   0   36.30   27.80
 -11  -5   0   54.69   24.20
  11   5   0  116.29   41.50
  12   5   0   39.70   35.40
  13   5   0   27.50   36.70
  14   5   0   44.00   40.00
 -13   6   0    5.60   32.00
 -12   6   0   11.70   32.50
  11  -6   0  -13.40   32.80
 -11   6   0  -19.90   28.80
  10  -6   0    4.70   22.10
 -10   6   0   14.20   28.10
   9  -6   0   33.90   23.70
  -9   6   0   49.50   31.60
   8  -6   0    7.90   21.40
  -8   6   0    5.10   24.80
   7  -6   0   17.30   16.20
  -7   6   0    4.70   21.10
   6  -6   0  208.58   36.50
  -6   6   0  227.38   45.30
  -6   6   0  292.37   30.20
   5  -6   0  -10.90    9.10
  -5   6   0   -9.60    8.00
  -5   6   0   -5.20   19.50
   4  -6   0  396.46   42.30
  -4   6   0  368.46   38.70
  -4   6   0  323.07   47.10
   3  -6   0  106.39   20.00
  -3   6   0   54.09   19.60
  -3   6   0   96.79   24.70
   2  -6   0  488.05   52.79
  -2   6   0  585.64   56.39
  -2   6   0  496.05   49.60
   1  -6   0   54.89   14.90
  -1   6   0   72.59   16.80
  -1   6   0   78.69   19.40
   0  -6   0  302.27   33.90
   0   6   0  356.46   35.60
   0   6   0  312.17   36.90
  -1  -6   0  546.25   48.20
   1   6   0  453.55   44.30
   1   6   0  461.35   48.80
  -2  -6   0   35.80   15.40
  -2  -6   0   35.10    7.40
   2   6   0   34.90    7.70
   2   6   0   52.79   17.60
  -3  -6   0  300.67   38.70
   3   6   0  292.07   36.90
  -4  -6   0  777.52   76.89
   4   6   0  766.82   78.39
   4   6   0  784.12   73.89
  -5  -6   0   37.10   18.90
  -5  -6   0   21.50    8.60
   5   6   0   19.90   14.10
   5   6   0   31.20   19.80
  -6  -6   0    5.50   17.60
  -6  -6   0  -10.20    7.40
   6   6   0   15.60   11.90
   6   6   0   -6.70   17.10
  -7  -6   0   26.60   12.80
   7   6   0   45.20   15.90
   7   6   0  -24.80   13.50
  -8  -6   0   -1.50   11.50
   8   6   0   -9.70   12.90
   8   6   0   18.00   21.90
  -9  -6   0   97.19   23.90
   9   6   0  116.29   26.80
   9   6   0   84.09   29.90
 -10  -6   0  260.27   37.50
  10   6   0  163.88   43.90
  10   6   0  133.19   32.30
  11   6   0   87.09   36.40
  12   6   0  -29.90   24.30
  13   6   0   38.30   36.80
  14   6   0    7.10   37.70
 -12   7   0   23.10   38.80
 -11   7   0   16.00   31.70
  10  -7   0   -4.10   21.20
 -10   7   0   46.10   37.00
   9  -7   0   20.00   22.00
  -9   7   0   14.90   31.60
   8  -7   0   68.89   26.10
  -8   7   0   59.39   32.00
   7  -7   0   19.70   17.90
  -7   7   0    8.20   23.20
   6  -7   0  173.28   34.00
  -6   7   0  258.27   29.20
  -6   7   0  260.67   49.20
   5  -7   0   20.40   14.70
  -5   7   0   -4.20    9.20
  -5   7   0   13.30   19.60
   4  -7   0    1.00   13.30
  -4   7   0    4.10   11.20
  -4   7   0   15.20   21.00
   3  -7   0  125.99   29.30
  -3   7   0   68.99   18.00
  -3   7   0   34.00   19.20
   2  -7   0  445.26   47.10
  -2   7   0  435.66   51.19
  -2   7   0  437.86   45.90
   1  -7   0 1572.34  131.39
  -1   7   0 1445.46  132.69
  -1   7   0 1656.03  135.59
   0  -7   0   21.00   11.50
   0   7   0   49.40   15.50
   0   7   0   21.10   14.10
  -1  -7   0   99.39   20.00
   1   7   0   90.69   17.70
   1   7   0  140.79   24.90
  -2  -7   0  118.29   23.80
  -2  -7   0  166.08   16.30
   2   7   0   95.39   15.40
   2   7   0  126.89   26.00
  -3  -7   0   69.49   20.60
   3   7   0   63.19   19.60
  -4  -7   0   93.69   22.30
   4   7   0   27.60   16.80
  -5  -7   0  854.11   65.89
  -5  -7   0  843.52   82.69
   5   7   0  760.62   65.79
   5   7   0  839.02   83.89
   5   7   0  708.13   76.49
  -6  -7   0  132.39   31.60
  -6  -7   0  148.99   18.00
   6   7   0  171.98   36.00
   6   7   0   80.19   24.70
  -7  -7   0  329.77   36.50
   7   7   0  365.96   45.70
   7   7   0  448.16   56.19
  -8  -7   0   -1.20   10.60
   8   7   0   -4.70   14.00
   8   7   0  -21.30   18.50
  -9  -7   0   36.70   17.40
   9   7   0   -1.70   15.70
   9   7   0   -2.70   22.90
  10   7   0   51.19   31.20
  10   7   0   89.29   26.70
  11   7   0   77.39   36.10
  12   7   0   -5.10   30.00
  13   7   0   -2.30   33.90
  14   7   0   32.10   37.30
 -12   8   0   -4.70   33.20
 -11   8   0   34.40   34.50
 -10   8   0  -32.90   27.00
   9  -8   0   30.30   23.70
  -9   8   0   38.90   35.10
   8  -8   0  -32.00   17.10
  -8   8   0   33.70   28.80
   7  -8   0   -1.50   16.10
  -7   8   0   72.69   32.00
   6  -8   0  280.47   42.40
  -6   8   0  323.67   50.19
  -6   8   0  279.77   34.70
   5  -8   0   93.19   24.80
  -5   8   0   95.29   32.10
  -5   8   0   69.09   18.30
   4  -8   0   74.49   23.90
  -4   8   0  141.79   33.80
  -4   8   0   85.59   19.60
   3  -8   0  221.48   38.40
  -3   8   0  239.38   38.10
  -3   8   0  257.47   34.20
   2  -8   0  422.56   55.89
  -2   8   0  403.06   50.39
  -2   8   0  487.45   48.50
   1  -8   0   72.59   16.90
  -1   8   0   45.00   18.60
  -1   8   0   60.99   20.30
   0  -8   0  233.48   30.60
   0   8   0  251.87   32.00
   0   8   0  228.58   35.10
  -1  -8   0   29.30   14.70
   1   8   0   -3.40   13.50
   1   8   0   46.10   14.00
  -2  -8   0  -11.80   11.20
   2   8   0   15.20   16.10
   2   8   0    2.30    7.90
  -3  -8   0   46.00   18.40
   3   8   0   56.49   19.10
  -4  -8   0  -29.30   12.40
   4   8   0    6.50   13.20
  -5  -8   0   70.79   24.40
   5   8   0  129.19   30.90
   5   8   0   87.49   23.30
  -6  -8   0  230.78   41.80
   6   8   0  188.58   19.70
   6   8   0  262.17   45.30
   6   8   0  218.28   20.10
   6   8   0  211.38   35.60
  -7  -8   0  137.19   18.50
  -7  -8   0  166.88   38.40
   7   8   0  103.89   32.90
   7   8   0  143.29   29.90
  -8  -8   0  242.48   30.20
   8   8   0  257.57   39.40
   8   8   0  267.47   49.80
   9   8   0   11.50   19.30
   9   8   0   40.10   26.50
  10   8   0  153.18   43.30
  10   8   0  207.08   39.20
  11   8   0   17.20   27.70
  12   8   0   26.90   31.70
  13   8   0  -14.10   32.60
  14   8   0   15.70   39.00
 -12   9   0    5.50   35.40
 -11   9   0   31.20   38.40
 -10   9   0   -3.60   34.50
  -9   9   0    7.70   34.10
   8  -9   0   10.50   20.00
  -8   9   0   61.69   37.50
   7  -9   0   62.29   25.80
  -7   9   0  106.29   35.20
   6  -9   0   -3.90   16.30
  -6   9   0  -12.80   12.10
  -6   9   0  -12.40   23.60
   5  -9   0    0.70   17.20
  -5   9   0    7.90   13.10
  -5   9   0  -19.20   19.30
   4  -9   0    6.90   18.80
  -4   9   0   36.20   25.10
  -4   9   0   43.10   16.40
   3  -9   0  195.08   32.30
  -3   9   0  194.48   37.30
  -3   9   0  187.18   30.60
   2  -9   0  296.77   38.60
  -2   9   0  347.17   44.80
  -2   9   0  307.37   42.20
   1  -9   0    9.30   16.20
  -1   9   0   49.30   18.90
  -1   9   0   43.30   18.10
   0  -9   0   14.30   15.80
   0   9   0   27.30   15.90
   0   9   0   76.39   21.70
  -1  -9   0  150.58   25.50
   1   9   0  115.69   26.00
   1   9   0  122.29   22.40
  -2  -9   0  192.98   31.10
   2   9   0  197.88   33.20
   2   9   0  210.28   23.90
  -3  -9   0   97.29   13.70
  -3  -9   0  125.09   27.60
   3   9   0   95.09   24.70
   3   9   0  115.69   13.00
  -4  -9   0  624.14   64.89
   4   9   0  537.05   63.29
  -5  -9   0  134.19   33.90
   5   9   0  197.18   40.00
   5   9   0  243.68   39.90
  -6  -9   0  435.66   59.89
   6   9   0  504.75   64.29
   6   9   0  535.05   58.19
  -7  -9   0   25.00   20.70
   7   9   0  -22.50   18.20
   7   9   0  -21.30   14.90
   8   9   0   41.60   22.50
   8   9   0   -5.10   21.50
   9   9   0  169.28   34.50
   9   9   0   35.90   31.40
  10   9   0  135.39   42.70
  10   9   0  136.59   34.20
  11   9   0   94.89   37.80
  12   9   0   69.59   38.90
  13   9   0  -18.10   27.20
  14   9   0  -18.10   36.70
 -11  10   0  -27.40   33.00
 -10  10   0  -28.90   28.70
  -9  10   0   23.80   36.30
  -8  10   0   23.10   28.80
   7 -10   0    5.50   23.50
  -7  10   0    1.20   26.50
   6 -10   0   -2.70   21.70
  -6  10   0  -15.20   13.40
  -6  10   0  -21.80   18.70
   5 -10   0   48.60   25.00
  -5  10   0   31.00   26.70
  -5  10   0  118.69   24.10
   4 -10   0   13.30   19.50
  -4  10   0   29.00   23.40
  -4  10   0   -5.90   14.30
   3 -10   0    2.90   13.10
  -3  10   0   24.20   15.60
  -3  10   0   12.00   21.30
   2 -10   0  166.68   27.50
  -2  10   0  142.99   29.20
  -2  10   0  261.97   38.20
   1 -10   0   82.59   21.30
  -1  10   0   66.99   23.80
  -1  10   0  103.19   24.70
   0 -10   0  503.85   52.79
   0  10   0  563.84   55.49
   0  10   0  464.05   56.39
  -1 -10   0  206.78   32.80
   1  10   0  201.68   37.60
   1  10   0  273.27   31.00
  -2 -10   0  248.38   36.90
   2  10   0  291.47   31.30
   2  10   0  348.37   43.60
  -3 -10   0   42.90   18.40
  -3 -10   0   23.10   10.20
   3  10   0   25.40    8.50
   3  10   0   53.69   20.80
  -4 -10   0   13.30   16.80
   4  10   0   -4.80   15.00
  -5 -10   0  405.66   54.79
   5  10   0  444.26   54.69
  -6 -10   0  292.97   48.80
   6  10   0  335.87   47.80
   6  10   0  364.76   53.49
  -7 -10   0  171.58   41.00
   7  10   0  328.57   55.29
   7  10   0  218.58   42.70
  -8 -10   0   31.20   26.80
   8  10   0   60.69   25.20
   8  10   0  113.79   35.80
   9  10   0   35.90   28.40
   9  10   0   32.30   23.10
  10  10   0   58.49   26.70
  10  10   0   49.70   31.60
  11  10   0    6.40   23.00
  11  10   0   30.30   29.60
  12  10   0  -27.10   22.30
  13  10   0   -5.20   32.00
  14  10   0   62.89   45.90
 -11  11   0   -8.30   31.10
 -10  11   0   47.30   35.50
  -9  11   0  -11.50   27.40
  -8  11   0   31.80   34.60
  -7  11   0  -12.20   23.00
   6 -11   0   -7.80   22.30
  -6  11   0  -16.20   20.20
   5 -11   0   61.89   27.10
  -5  11   0   74.29   21.50
  -5  11   0   28.40   25.30
   4 -11   0   95.19   27.20
  -4  11   0  144.89   27.80
  -4  11   0  156.38   38.10
   3 -11   0   20.70   18.10
  -3  11   0   -5.40   13.80
  -3  11   0  -17.80   14.60
   2 -11   0   38.70   16.10
  -2  11   0   -8.00   15.60
  -2  11   0   43.10   19.80
   1 -11   0   12.40   11.80
  -1  11   0    0.60   13.00
  -1  11   0  -19.00   13.10
   0 -11   0  268.57   36.40
   0  11   0  293.87   37.80
   0  11   0  292.67   42.30
  -1 -11   0  346.07   42.70
   1  11   0  386.56   48.00
   1  11   0  323.87   39.10
  -2 -11   0   94.49   24.30
   2  11   0   85.29   18.30
   2  11   0  114.59   26.60
  -3 -11   0  327.57   46.30
   3  11   0  364.96   34.50
   3  11   0  373.66   47.20
  -4 -11   0   94.49   25.80
   4  11   0   89.29   28.90
  -5 -11   0   77.39   27.00
   5  11   0  120.29   30.80
  -6 -11   0  139.39   34.90
   6  11   0  258.87   48.40
   6  11   0  117.59   33.30
  -7 -11   0  -22.50   16.50
   7  11   0    5.50   19.90
   7  11   0   25.40   20.30
  -8 -11   0   13.00   24.10
   8  11   0    6.00   18.60
   8  11   0   12.30   21.60
   9  11   0  314.37   60.89
   9  11   0  193.18   43.70
  10  11   0  -18.90   22.50
  10  11   0    3.50   21.90
  11  11   0    3.90   25.00
  11  11   0   26.40   31.60
  12  11   0   34.20   31.80
  13  11   0   -5.80   34.30
  14  11   0  -38.90   30.20
 -11  12   0   88.59   51.49
 -10  12   0  -63.59   25.00
  -9  12   0  -31.40   29.00
  -8  12   0   -0.10   27.70
  -7  12   0  -28.60   22.40
  -6  12   0   61.69   32.70
   5 -12   0  -10.30   21.50
  -5  12   0   22.30   25.90
  -5  12   0  -18.40   13.60
   4 -12   0  -16.60   15.20
  -4  12   0   -8.40   17.70
  -4  12   0   18.50   18.40
   3 -12   0  305.77   41.40
  -3  12   0  316.07   44.10
  -3  12   0  290.77   53.29
   2 -12   0  192.58   32.40
  -2  12   0  172.68   33.80
  -2  12   0  170.88   37.90
   1 -12   0  304.07   42.60
  -1  12   0  357.86   48.80
  -1  12   0  425.26   48.60
   0 -12   0  210.48   31.00
   0  12   0  156.38   34.80
   0  12   0  179.48   33.60
  -1 -12   0   36.30   16.00
   1  12   0  -15.50   16.20
   1  12   0   12.60   13.30
  -2 -12   0   48.90   19.30
   2  12   0   42.70   26.10
   2  12   0   95.99   19.10
  -3 -12   0   15.60   17.50
   3  12   0   26.10   10.90
   3  12   0   24.40   19.40
  -4 -12   0  291.67   42.80
   4  12   0  204.78   39.40
  -5 -12   0   45.60   22.80
   5  12   0   12.30   17.70
  -6 -12   0   -6.10   17.30
   6  12   0    3.60   22.70
   6  12   0   -2.50   17.00
  -7 -12   0   67.99   27.70
   7  12   0   32.60   23.40
   7  12   0   30.30   28.50
  -8 -12   0  -15.40   19.00
   8  12   0  -11.30   23.80
   8  12   0    4.90   21.70
   9  12   0   27.00   30.10
   9  12   0   10.60   22.90
  10  12   0   16.50   26.50
  10  12   0   49.70   37.50
  11  12   0   16.00   32.10
  11  12   0    8.00   23.80
  12  12   0   39.80   37.10
  13  12   0  -22.40   28.10
  14  12   0  -41.90   37.30
 -10  13   0   16.60   33.80
  -9  13   0   19.20   38.20
  -8  13   0  -15.50   25.20
  -7  13   0  109.79   44.80
  -6  13   0  -24.60   22.90
  -5  13   0   99.49   38.80
  -5  13   0   62.59   26.10
   4 -13   0  -31.80   20.60
  -4  13   0    4.90   24.30
  -4  13   0    0.10   19.60
   3 -13   0   23.70   18.20
  -3  13   0   64.29   27.10
  -3  13   0   14.30   17.50
   2 -13   0   -2.80   13.60
  -2  13   0   -2.70   20.30
  -2  13   0  -10.50   16.20
   1 -13   0  344.37   43.40
  -1  13   0  321.37   48.50
  -1  13   0  392.56   51.59
   0 -13   0   86.89   22.50
   0  13   0   35.00   24.00
   0  13   0  114.89   27.10
  -1 -13   0  215.28   36.80
   1  13   0  214.78   33.90
   1  13   0  242.08   43.90
  -2 -13   0   65.89   22.40
   2  13   0   75.99   18.60
   2  13   0  125.69   33.10
  -3 -13   0    6.70   18.10
   3  13   0   52.49   13.70
   3  13   0   44.30   22.00
  -4 -13   0   11.10   17.90
   4  13   0   51.59   24.30
  -5 -13   0   -0.80   19.10
   5  13   0    7.80   21.00
  -6 -13   0  173.28   40.80
   6  13   0  199.68   41.90
   6  13   0  117.79   39.60
  -7 -13   0  -30.80   18.70
   7  13   0   13.00   24.00
   7  13   0   -1.30   21.70
  -8 -13   0  -18.40   19.90
   8  13   0    7.70   23.30
   8  13   0  -27.10   19.60
  -9 -13   0   56.89   34.10
   9  13   0   89.99   38.10
   9  13   0  135.39   39.50
  10  13   0   34.60   28.00
  10  13   0   21.90   30.30
  11  13   0   41.70   27.40
  11  13   0  -14.10   31.90
  12  13   0   29.70   37.30
  13  13   0   35.90   40.80
  14  13   0    5.00   41.00
 -10  14   0  -38.60   32.40
  -9  14   0   -8.60   32.40
  -8  14   0   20.00   31.80
  -7  14   0   -3.50   25.70
  -6  14   0   -9.90   28.60
  -5  14   0   26.30   29.50
  -5  14   0   24.60   22.30
  -4  14   0    6.80   21.40
  -4  14   0   30.20   26.20
   3 -14   0   -6.70   21.10
  -3  14   0   67.89   29.80
  -3  14   0   56.39   27.80
   2 -14   0   45.30   18.80
  -2  14   0   32.90   22.30
  -2  14   0   -7.50   19.80
   1 -14   0   13.70   15.80
  -1  14   0   45.80   24.70
  -1  14   0   20.50   24.70
   0 -14   0   -6.30   13.10
   0  14   0    5.60   17.70
   0  14   0   54.09   24.60
  -1 -14   0   19.30   17.40
   1  14   0   60.49   26.30
   1  14   0   56.39   19.30
  -2 -14   0   10.50   18.50
   2  14   0   -7.00   21.00
   2  14   0   -6.90   11.30
  -3 -14   0   72.39   27.20
   3  14   0   87.89   18.50
   3  14   0   58.19   29.10
  -4 -14   0  199.18   40.60
   4  14   0  104.79   31.60
  -5 -14   0   -1.30   18.80
   5  14   0  -32.20   15.30
  -6 -14   0   13.50   22.70
   6  14   0   45.80   26.30
   6  14   0   -7.90   24.40
  -7 -14   0  -10.00   20.90
   7  14   0   28.40   24.80
   7  14   0    7.20   26.10
  -8 -14   0    8.60   25.10
   8  14   0   12.70   25.20
   8  14   0   -1.20   21.00
  -9 -14   0  -29.60   20.50
   9  14   0  -11.70   27.80
   9  14   0  -19.40   19.70
  10  14   0   33.80   32.20
  10  14   0   21.00   28.00
  11  14   0  -14.70   26.80
  11  14   0    6.50   25.90
  12  14   0  -25.20   32.90
  13  14   0   -0.40   33.70
  14  14   0   29.30   49.60
  -9  15   0   15.60   36.00
  -8  15   0   -2.80   34.00
  -7  15   0    8.10   28.40
  -6  15   0   20.90   34.80
  -5  15   0   13.50   32.80
  -4  15   0   34.60   31.40
  -4  15   0   65.79   28.30
  -3  15   0   18.00   23.20
  -3  15   0  -34.70   22.10
   2 -15   0   40.70   26.00
  -2  15   0  166.88   41.50
  -2  15   0   46.40   27.90
   1 -15   0   92.79   25.10
  -1  15   0   17.00   22.00
  -1  15   0   69.19   27.80
   0 -15   0  210.38   36.90
   0  15   0  180.38   41.10
   0  15   0  152.48   36.00
  -1 -15   0   21.60   19.80
   1  15   0   24.10   25.10
   1  15   0   -8.40   16.70
  -2 -15   0   40.20   22.80
   2  15   0   99.09   23.80
   2  15   0  129.59   34.50
  -3 -15   0   76.89   28.60
   3  15   0   44.40   30.40
  -4 -15   0  -23.50   17.10
   4  15   0  -10.60   22.10
  -5 -15   0  179.58   41.50
   5  15   0  170.98   40.90
  -6 -15   0   33.70   27.00
   6  15   0  -15.00   18.00
   6  15   0    3.80   28.50
  -7 -15   0  -18.10   19.90
   7  15   0   29.30   30.10
   7  15   0  -18.90   21.40
  -8 -15   0   12.90   25.20
   8  15   0  -21.00   23.60
   8  15   0  -14.10   22.60
  -9 -15   0   19.20   30.60
   9  15   0  -17.20   27.60
   9  15   0   20.10   25.30
  10  15   0  -17.90   24.30
  10  15   0   -7.50   28.50
  11  15   0   13.70   37.50
  11  15   0   -8.10   25.80
  12  15   0   21.90   36.00
  12  15   0   12.50   38.10
  13  15   0   27.80   46.20
  -9  16   0   -3.50   34.00
  -8  16   0  -22.50   28.80
  -7  16   0   72.89   43.10
  -6  16   0   32.60   33.90
  -5  16   0   19.20   30.80
  -4  16   0    2.40   20.80
  -4  16   0   -2.00   26.00
  -3  16   0   -8.80   25.30
  -3  16   0   20.00   27.30
  -2  16   0   20.80   28.20
  -2  16   0  -18.00   23.40
   1 -16   0   13.70   16.50
  -1  16   0   -9.90   22.60
  -1  16   0   42.10   26.90
   0 -16   0  -13.20   16.60
   0  16   0   41.20   25.00
   0  16   0   88.99   34.20
  -1 -16   0   69.79   26.10
   1  16   0   93.89   31.70
   1  16   0   59.69   24.00
  -2 -16   0   25.80   20.00
   2  16   0   21.70   24.80
   2  16   0   -9.10   14.80
  -3 -16   0   66.79   27.70
   3  16   0   21.50   25.70
  -4 -16   0  137.49   36.60
   4  16   0  198.08   44.60
  -5 -16   0   57.59   29.40
   5  16   0   75.09   32.30
  -6 -16   0   18.10   23.80
   6  16   0   65.29   33.90
   6  16   0   17.60   27.80
  -7 -16   0   36.70   28.00
   7  16   0   52.99   33.50
   7  16   0   44.30   31.60
  -8 -16   0   42.80   32.00
   8  16   0   16.60   32.30
   8  16   0   -5.80   29.10
  -9 -16   0  -37.60   26.90
   9  16   0  -20.60   22.70
   9  16   0   36.50   36.20
  10  16   0  -38.40   26.00
  10  16   0  -29.10   24.10
  11  16   0  -13.20   28.70
  11  16   0  -50.79   31.30
  12  16   0  -24.50   29.80
  12  16   0   49.30   43.40
  13  16   0   54.79   42.10
  -8  17   0  -14.00   32.80
  -7  17   0   26.50   38.10
  -6  17   0   -9.70   34.60
  -5  17   0   -7.50   31.10
  -4  17   0   50.99   37.40
  -4  17   0  -21.40   19.70
  -3  17   0  -45.20   22.10
  -3  17   0   10.70   24.50
  -2  17   0   21.70   26.20
  -2  17   0   -5.80   22.60
  -1  17   0  -23.00   19.70
  -1  17   0    6.90   26.40
   0 -17   0   72.79   27.40
   0  17   0   70.59   32.60
   0  17   0    9.20   23.10
  -1 -17   0    0.10   20.20
   1  17   0    0.10   20.00
   1  17   0   11.60   23.30
  -2 -17   0  114.19   31.60
   2  17   0   91.39   35.20
  -3 -17   0    4.50   21.40
   3  17   0   27.50   26.50
  -4 -17   0   23.70   25.10
   4  17   0   50.09   29.40
  -5 -17   0   22.40   23.50
   5  17   0   19.90   27.50
  -6 -17   0  130.99   39.50
   6  17   0  114.19   38.80
  -7 -17   0   25.50   27.00
   7  17   0   32.40   33.30
   7  17   0    9.60   26.50
  -8 -17   0   53.49   36.90
   8  17   0   40.40   37.30
   8  17   0   34.90   32.80
  -9 -17   0    3.00   31.90
   9  17   0   -2.10   30.20
   9  17   0   39.30   31.70
  10  17   0    0.30   34.90
  10  17   0   30.50   34.30
  11  17   0  -12.70   29.70
  11  17   0   -4.20   35.50
  12  17   0    0.40   42.40
  12  17   0    2.20   30.10
  13  17   0   17.80   44.30
  -7  18   0   29.20   37.40
  -6  18   0   21.50   36.10
  -5  18   0   33.70   36.70
  -4  18   0  -22.00   24.00
  -3  18   0    6.80   31.40
  -3  18   0   14.90   27.30
  -2  18   0   -6.00   24.20
  -2  18   0   49.50   30.90
  -1  18   0   20.40   28.30
  -1  18   0  -45.30   21.40
   0  18   0   -9.30   24.60
   0  18   0    4.10   21.40
  -1 -18   0  197.08   40.00
   1  18   0  159.98   42.00
   1  18   0  135.89   45.00
  -2 -18   0   14.00   22.00
   2  18   0    5.70   28.20
  -3 -18   0   26.00   23.90
   3  18   0   -4.70   24.50
  -4 -18   0   27.80   24.40
   4  18   0   72.69   34.80
  -5 -18   0   34.20   26.40
   5  18   0    4.80   26.90
  -6 -18   0  -28.90   24.40
   6  18   0   54.09   35.00
  -7 -18   0   16.50   32.00
   7  18   0   52.69   34.20
   7  18   0  121.69   46.80
  -8 -18   0   12.30   30.40
   8  18   0   45.70   36.90
   8  18   0   23.50   30.70
  -9 -18   0   -6.40   29.30
   9  18   0  -15.00   32.30
   9  18   0  -19.90   24.50
 -10 -18   0    9.50   33.90
  10  18   0  -28.60   36.90
  10  18   0   -2.90   28.30
  11  18   0   36.70   40.10
  11  18   0  -29.20   27.10
  12  18   0  -10.90   31.10
  12  18   0   97.99   48.90
  -7  19   0   22.90   45.70
  -6  19   0   21.00   41.20
  -5  19   0   -1.20   29.90
  -4  19   0   76.79   38.80
  -3  19   0    8.80   31.60
  -3  19   0   11.10   30.70
  -2  19   0   -2.70   25.80
  -2  19   0   22.30   30.20
  -1  19   0    7.70   28.70
  -1  19   0   62.39   32.10
   0  19   0   -2.30   23.70
   0  19   0    6.60   26.10
   1  19   0   17.30   32.00
  -2 -19   0  -15.60   22.80
   2  19   0   12.80   30.70
  -3 -19   0   28.50   23.30
   3  19   0  -25.20   24.00
  -4 -19   0    4.20   23.40
   4  19   0   -7.40   26.50
  -5 -19   0   13.50   26.20
   5  19   0   -5.00   24.10
  -6 -19   0   17.00   30.60
   6  19   0   63.29   41.20
   6  19   0   73.69   38.90
  -7 -19   0   31.60   33.00
   7  19   0    2.00   32.80
   7  19   0  -23.80   23.90
  -8 -19   0  -23.40   27.70
   8  19   0    3.30   26.40
   8  19   0  109.39   45.10
  -9 -19   0   -9.00   28.20
   9  19   0   11.90   32.30
   9  19   0  -18.50   35.60
 -10 -19   0   37.00   39.30
  10  19   0    3.60   40.40
  10  19   0   27.00   35.60
  11  19   0  -31.10   28.20
  11  19   0   -2.60   33.40
  12  19   0   28.20   41.20
  12  19   0   25.70   36.70
  -6  20   0   36.70   48.20
  -5  20   0   -3.50   37.20
  -4  20   0    0.10   36.30
  -3  20   0   36.80   30.10
  -3  20   0   32.80   37.20
  -2  20   0  -17.70   27.50
  -2  20   0   23.70   31.40
  -1  20   0   76.29   38.10
  -1  20   0  120.59   41.50
   0  20   0   -1.90   29.90
   1  20   0   32.50   34.30
   2  20   0   -9.00   25.80
  -3 -20   0   21.20   27.00
   3  20   0  -16.20   25.60
  -4 -20   0   21.30   29.40
   4  20   0   32.60   33.70
  -5 -20   0   47.50   32.10
   5  20   0   14.60   29.90
  -6 -20   0   67.39   34.20
   6  20   0   46.30   37.60
   6  20   0   12.20   34.90
  -7 -20   0   28.60   32.90
   7  20   0   71.39   37.00
   7  20   0   41.10   37.50
  -8 -20   0   51.49   35.40
   8  20   0   43.30   34.20
   8  20   0   20.20   35.80
  -9 -20   0  -39.30   26.30
   9  20   0    1.00   30.10
   9  20   0  -34.40   33.70
 -10 -20   0  -58.39   26.90
  10  20   0  -23.00   35.30
  10  20   0  -12.20   25.60
  11  20   0   -8.10   35.80
  11  20   0   -7.90   30.40
  -5  21   0    9.80   38.20
  -4  21   0   -0.20   37.50
  -3  21   0   13.90   34.30
  -2  21   0   12.50   30.70
  -2  21   0   -4.40   33.00
  -1  21   0  121.19   42.30
   0  21   0   49.00   35.50
   1  21   0   41.90   35.00
   2  21   0   -1.90   35.90
   3  21   0   11.70   30.00
  -4 -21   0   11.20   28.80
   4  21   0   -3.00   30.20
  -5 -21   0   17.40   29.70
   5  21   0    0.60   30.90
  -6 -21   0  -10.30   28.30
   6  21   0  -42.40   28.10
   6  21   0   -2.00   33.70
  -7 -21   0   64.69   39.30
   7  21   0   53.99   40.30
   7  21   0   37.30   34.70
  -8 -21   0  -10.00   32.20
   8  21   0  -26.60   27.60
   8  21   0  -37.40   36.00
  -9 -21   0  -29.60   32.70
   9  21   0   71.59   47.10
   9  21   0  -18.60   32.60
 -10 -21   0    6.80   38.50
  10  21   0    7.70   39.20
  10  21   0   33.40   36.30
  11  21   0   34.70   36.20
  11  21   0   36.90   41.90
  -4  22   0    8.00   35.90
  -3  22   0   -6.80   35.30
  -2  22   0  -51.89   30.50
  -1  22   0   32.60   37.00
   0  22   0   22.60   30.40
   1  22   0  -26.10   29.90
   2  22   0  -12.50   31.40
   3  22   0  -51.59   28.60
   4  22   0   -0.40   27.90
  -5 -22   0    9.50   30.90
   5  22   0  112.29   45.50
  -6 -22   0   44.40   33.60
   6  22   0   -6.70   32.10
   6  22   0    1.20   34.20
  -7 -22   0  -25.40   27.70
   7  22   0   23.30   37.40
   7  22   0  -22.30   31.80
  -8 -22   0  -20.50   28.20
   8  22   0  -39.20   33.30
   8  22   0    3.10   33.30
  -9 -22   0    8.20   36.20
   9  22   0    6.90   37.00
   9  22   0  -33.20   35.20
 -10 -22   0   24.70   39.20
  10  22   0    7.50   41.20
  10  22   0    8.30   38.80
  -2  23   0    6.70   35.70
  -1  23   0  -54.19   26.70
   0  23   0  128.49   49.20
   1  23   0   37.90   38.50
   2  23   0    8.10   36.20
   3  23   0   32.50   41.80
   4  23   0  -23.70   31.50
   5  23   0    4.30   36.10
  -6 -23   0    3.50   28.80
   6  23   0   18.50   37.80
   6  23   0  -18.90   30.30
  -7 -23   0  -11.50   32.80
   7  23   0   42.10   41.60
   7  23   0  -55.29   32.50
  -8 -23   0   35.70   37.80
   8  23   0   -5.60   36.90
   8  23   0   36.60   45.40
  -9 -23   0   20.30   37.00
   9  23   0   14.80   36.70
   9  23   0    1.00   44.90
  -1  24   0   30.00   40.50
   0  24   0   35.40   38.70
   1  24   0  -17.80   31.70
   2  24   0   19.50   37.80
   3  24   0   -3.80   34.70
   4  24   0   -7.40   36.90
   5  24   0    8.50   40.20
   6  24   0  -21.10   36.30
   6  24   0  -11.40   38.80
   7  24   0  -14.30   34.80
   7  24   0   28.30   41.50
  -8 -24   0    4.10   37.20
   8  24   0    1.10   39.10
   8  24   0  -55.49   37.30
   1  25   0  -18.40   37.20
   2  25   0   -8.10   37.00
   3  25   0   19.10   44.30
   4  25   0  -13.40   39.00
   5  25   0  -18.30   42.50
   6  25   0  -22.80   42.90
   7  25   0   15.60   64.39
   6  25  -1  -15.40   34.00
   5  25  -1    3.90   43.90
   4  25  -1  -39.00   38.00
   3  25  -1  -46.20   34.50
   2  25  -1  -73.69   31.30
   1  25  -1   19.90   34.50
   8  24  -1  -36.30   38.50
   8  24  -1   -3.20   32.10
  -8 -24   1  -22.90   37.90
   7  24  -1   41.60   46.90
   7  24  -1   -9.40   34.10
  -7 -24   1  104.89   49.20
   6  24  -1   35.30   42.90
   6  24  -1   47.90   48.30
   5  24  -1   16.80   36.50
   4  24  -1   17.70   41.80
   3  24  -1   45.40   45.80
   2  24  -1  -41.70   32.30
   1  24  -1   55.69   43.40
   0  24  -1  122.39   49.40
  -1  24  -1  -28.20   32.80
   9  23  -1   -8.90   32.60
   9  23  -1   57.79   48.40
  -9 -23   1   21.50   34.90
   8  23  -1    9.90   33.10
   8  23  -1    2.60   46.50
  -8 -23   1  -16.60   33.90
   7  23  -1    7.30   41.30
   7  23  -1   -1.30   32.20
  -7 -23   1   -4.10   31.20
   6  23  -1   32.60   37.60
   6  23  -1    2.80   39.50
  -6 -23   1   18.90   36.00
   5  23  -1    6.40   35.30
   4  23  -1  -35.70   30.30
   3  23  -1  -21.20   28.40
   2  23  -1    8.40   37.90
   1  23  -1   19.50   37.70
   0  23  -1   -6.30   30.10
  -1  23  -1   21.80   39.60
  -2  23  -1   -1.70   35.90
  10  22  -1  -32.50   29.20
  10  22  -1   68.49   51.09
 -10 -22   1  -26.60   38.10
   9  22  -1   -0.90   37.80
   9  22  -1   21.80   36.60
  -9 -22   1   10.90   34.80
   8  22  -1   25.80   40.10
   8  22  -1   36.00   32.20
  -8 -22   1   -3.00   33.90
   7  22  -1   12.40   29.30
   7  22  -1  -21.60   31.10
  -7 -22   1   -8.50   31.10
   6  22  -1   28.70   34.70
  -6 -22   1   -4.90   32.50
   5  22  -1   -3.20   30.50
  -5 -22   1   20.70   31.30
   4  22  -1  -14.50   26.70
  -4 -22   1   27.00   37.10
   3  22  -1  -26.90   26.50
   2  22  -1  -35.60   31.60
   1  22  -1   23.20   32.10
   0  22  -1   35.00   34.10
  -1  22  -1  -33.70   30.00
  -2  22  -1   -4.30   33.00
  -3  22  -1    0.60   35.80
  -4  22  -1  -28.20   34.70
  11  21  -1   70.89   44.10
  11  21  -1   52.19   49.90
  10  21  -1    4.10   39.50
  10  21  -1  -24.90   30.20
 -10 -21   1  -31.80   35.80
   9  21  -1  -43.30   28.50
   9  21  -1   93.39   46.80
  -9 -21   1   -5.20   32.40
   8  21  -1  -24.10   32.50
   8  21  -1   10.50   27.30
  -8 -21   1   -2.10   37.60
   7  21  -1  -51.49   29.90
   7  21  -1    4.50   32.70
  -7 -21   1    8.80   31.40
   6  21  -1   65.39   39.00
  -6 -21   1   52.99   38.50
   5  21  -1   17.40   31.10
  -5 -21   1   28.40   30.70
   4  21  -1   16.30   33.50
  -4 -21   1   39.70   32.80
   3  21  -1  -13.30   31.90
  -3 -21   1   40.40   31.20
   2  21  -1  -22.40   30.00
   1  21  -1   30.60   33.00
   0  21  -1  -27.40   28.60
  -1  21  -1   -1.20   31.30
  -2  21  -1  -40.90   28.90
  -2  21  -1   -7.30   31.90
  -3  21  -1   33.60   36.40
  -4  21  -1  -16.10   32.80
  -5  21  -1  -27.40   30.00
  11  20  -1   19.40   37.60
  11  20  -1    0.10   40.00
  10  20  -1   34.40   35.60
  10  20  -1   28.90   44.10
 -10 -20   1   28.50   36.40
   9  20  -1  -25.40   34.10
   9  20  -1  -25.80   27.60
  -9 -20   1    5.60   28.00
   8  20  -1    1.20   36.50
   8  20  -1   45.60   34.40
  -8 -20   1   35.20   36.50
   7  20  -1  -30.80   30.80
   7  20  -1    7.90   31.10
  -7 -20   1  -16.80   25.40
   6  20  -1  -21.20   28.80
  -6 -20   1   -3.90   31.30
   5  20  -1   29.40   31.00
  -5 -20   1   32.30   29.10
   4  20  -1   -4.40   26.10
  -4 -20   1   14.10   28.00
   3  20  -1  -25.40   26.90
  -3 -20   1   -9.80   25.20
   2  20  -1   49.70   33.00
  -2 -20   1   32.00   27.20
   1  20  -1  -15.50   28.90
   0  20  -1   54.19   36.40
  -1  20  -1   55.39   34.40
  -1  20  -1   74.39   34.30
  -2  20  -1    4.70   30.20
  -2  20  -1    1.40   28.40
  -3  20  -1  -28.90   29.00
  -3  20  -1  -16.90   26.30
  -4  20  -1  -49.40   28.10
  -5  20  -1  -60.49   28.90
  -6  20  -1   -9.60   38.60
  12  19  -1   -3.50   40.10
  12  19  -1    9.30   34.50
  11  19  -1   37.20   38.50
  11  19  -1   25.60   34.80
  10  19  -1  -46.40   26.50
  10  19  -1   -8.90   33.70
 -10 -19   1  -32.90   30.60
   9  19  -1  -20.00   35.10
   9  19  -1  -17.30   27.80
  -9 -19   1   32.00   35.20
   8  19  -1    0.20   26.50
   8  19  -1   20.40   33.10
  -8 -19   1   23.90   36.30
   7  19  -1   70.29   41.80
   7  19  -1   -4.00   33.80
  -7 -19   1   29.60   34.10
   6  19  -1   31.20   25.60
  -6 -19   1   -9.70   27.20
   5  19  -1   13.90   27.60
  -5 -19   1   -5.00   24.90
   4  19  -1   11.40   26.10
  -4 -19   1   -4.70   21.30
   3  19  -1  -26.00   23.30
  -3 -19   1    7.30   27.00
   2  19  -1   34.20   28.50
  -2 -19   1   11.00   23.30
   1  19  -1   -4.90   27.00
  -1 -19   1  -19.80   20.60
   0  19  -1   66.39   29.30
   0  19  -1  -14.90   27.10
  -1  19  -1    2.80   26.50
  -1  19  -1   -3.80   25.50
  -2  19  -1   40.30   30.10
  -2  19  -1  -10.80   25.30
  -3  19  -1    3.20   29.40
  -3  19  -1   -2.50   29.60
  -4  19  -1   76.99   43.30
  -5  19  -1    4.80   37.30
  -6  19  -1   -9.30   38.40
  -7  19  -1    1.30   34.30
  12  18  -1    6.50   44.60
  12  18  -1   47.70   38.70
  11  18  -1   -4.60   32.90
  11  18  -1  -13.50   32.70
  10  18  -1   -9.70   30.70
  10  18  -1   45.20   37.20
 -10 -18   1   55.99   39.20
   9  18  -1   25.40   32.20
   9  18  -1  -27.80   28.10
  -9 -18   1   12.60   31.10
   8  18  -1   65.09   42.20
   8  18  -1  -10.00   28.10
  -8 -18   1   54.89   35.90
   7  18  -1  129.19   50.59
   7  18  -1   92.49   41.50
  -7 -18   1   61.09   34.90
   6  18  -1   11.70   26.30
  -6 -18   1  -30.40   21.70
   5  18  -1  -12.20   22.00
  -5 -18   1  -21.30   21.00
   4  18  -1   15.10   26.30
  -4 -18   1   81.29   33.80
   3  18  -1    6.60   25.00
  -3 -18   1   31.90   25.80
   2  18  -1  -19.60   22.10
  -2 -18   1   65.19   28.20
   1  18  -1   26.60   30.50
  -1 -18   1   57.29   28.30
   0  18  -1   14.70   22.80
   0  18  -1  -11.50   28.00
   0 -18   1    9.30   20.80
  -1  18  -1    9.20   29.00
  -1  18  -1   12.80   25.10
  -2  18  -1   31.20   28.90
  -2  18  -1   46.00   30.70
  -3  18  -1  -27.60   26.70
  -3  18  -1  -15.10   22.10
  -4  18  -1  -38.40   25.50
  -5  18  -1  -22.90   27.40
  -6  18  -1   35.50   37.30
  -7  18  -1  -15.30   35.70
  13  17  -1  -20.50   41.60
  12  17  -1  -18.90   33.10
  12  17  -1  -12.80   35.40
  11  17  -1   21.50   38.30
  11  17  -1  -17.40   28.90
  10  17  -1   -1.70   33.20
  10  17  -1  -40.70   26.30
 -10 -17   1   -5.00   29.70
   9  17  -1  -24.60   21.60
   9  17  -1    6.90   31.70
  -9 -17   1   47.10   35.10
   8  17  -1  -11.30   25.50
   8  17  -1  -15.00   26.30
  -8 -17   1   20.70   29.20
   7  17  -1  -28.10   23.50
   7  17  -1   54.29   36.40
  -7 -17   1   21.70   28.40
   6  17  -1    8.40   25.80
  -6 -17   1    2.90   24.30
   5  17  -1    3.90   25.50
  -5 -17   1    2.40   23.20
   4  17  -1   22.20   28.90
  -4 -17   1  -16.50   22.00
   3  17  -1   39.70   29.70
  -3 -17   1   97.19   32.90
   2  17  -1  126.59   39.10
  -2 -17   1  111.99   33.60
   1  17  -1   11.50   20.50
   1  17  -1  -12.80   24.20
  -1 -17   1   19.70   20.50
   0  17  -1   78.29   34.90
   0  17  -1   -3.50   21.40
   0 -17   1   50.99   24.40
  -1  17  -1   17.00   23.30
  -1  17  -1   22.40   24.00
   1 -17   1   36.60   21.30
  -2  17  -1    6.50   25.40
  -2  17  -1  -20.00   21.20
  -3  17  -1  -22.90   22.20
  -3  17  -1   -9.60   28.10
  -4  17  -1    0.60   24.80
  -4  17  -1   54.69   38.40
  -5  17  -1  -17.50   24.90
  -6  17  -1  -22.00   28.40
  -7  17  -1  -32.80   34.10
  -8  17  -1   15.90   38.30
  13  16  -1   11.80   44.40
  12  16  -1   88.79   39.60
  12  16  -1    8.70   41.70
  11  16  -1   -2.30   30.40
  11  16  -1   90.79   45.80
  10  16  -1   -2.10   31.60
  10  16  -1   33.90   28.20
 -10 -16   1   51.69   38.00
   9  16  -1   31.90   28.90
   9  16  -1   20.30   28.90
  -9 -16   1   12.40   28.20
   8  16  -1   36.40   34.80
   8  16  -1   96.69   36.90
  -8 -16   1  154.28   46.00
   7  16  -1   79.89   32.70
   7  16  -1   83.49   39.50
  -7 -16   1   84.39   37.70
   6  16  -1   77.69   36.80
  -6 -16   1   78.89   34.30
   5  16  -1   37.70   29.20
  -5 -16   1   -2.20   22.90
   4  16  -1  -14.90   23.50
  -4 -16   1   20.50   23.20
   3  16  -1  228.88   46.80
  -3 -16   1  139.99   35.30
   2  16  -1   41.70   20.00
   2  16  -1   16.40   25.30
  -2 -16   1   18.90   21.10
   1  16  -1  187.68   44.20
   1  16  -1  154.68   34.60
  -1 -16   1  155.78   37.00
   0  16  -1   67.09   32.60
   0  16  -1   67.69   27.60
   0 -16   1   34.60   22.80
  -1  16  -1  -16.90   22.20
  -1  16  -1    4.10   20.10
   1 -16   1    9.30   18.30
  -2  16  -1   28.50   26.50
  -2  16  -1   -9.90   26.50
   2 -16   1   43.00   21.10
  -3  16  -1   53.29   29.50
  -3  16  -1   12.80   23.80
  -4  16  -1   12.90   29.10
  -4  16  -1   17.90   23.00
  -5  16  -1   -8.80   31.50
  -6  16  -1   44.00   40.30
  -7  16  -1   11.10   32.20
  -8  16  -1  -47.40   31.30
  -9  16  -1    8.80   42.30
  13  15  -1    7.10   42.50
  12  15  -1   65.09   43.10
  12  15  -1   13.20   31.80
  11  15  -1    4.90   28.30
  11  15  -1    2.10   33.10
  10  15  -1  -71.09   27.10
  10  15  -1  -27.80   24.00
 -10 -15   1    0.50   29.30
   9  15  -1   -1.30   23.90
   9  15  -1   58.39   36.80
  -9 -15   1   25.60   31.20
   8  15  -1   64.39   36.80
   8  15  -1   41.90   30.40
  -8 -15   1   26.30   30.20
   7  15  -1  -43.80   24.30
   7  15  -1   10.80   26.00
  -7 -15   1   -9.40   23.30
   6  15  -1   42.20   27.60
  -6 -15   1   42.00   28.50
   5  15  -1  101.39   34.50
  -5 -15   1  101.39   33.30
   4  15  -1   32.20   27.90
  -4 -15   1   46.40   24.30
   3  15  -1    0.50   21.90
  -3 -15   1    5.20   20.50
   2  15  -1  300.27   40.50
   2  15  -1  364.96   52.09
  -2 -15   1  342.47   50.69
   1  15  -1   -1.60   23.10
   1  15  -1  -31.70   14.50
  -1 -15   1  -26.70   15.00
   0  15  -1   17.80   23.70
   0  15  -1   65.89   26.40
   0 -15   1   46.50   20.20
  -1  15  -1  -32.00   18.30
  -1  15  -1  -24.70   16.10
   1 -15   1   13.40   17.10
  -2  15  -1   48.10   26.90
  -2  15  -1   -5.30   20.30
   2 -15   1  -10.80   20.90
  -3  15  -1  103.49   32.40
  -3  15  -1   71.69   32.50
   3 -15   1  109.89   30.00
  -4  15  -1   44.80   32.80
  -4  15  -1   30.40   23.50
  -5  15  -1  -15.70   27.90
  -6  15  -1   19.20   32.10
  -7  15  -1   27.00   36.60
  -8  15  -1   -2.20   30.90
  -9  15  -1   21.80   39.40
  13  14  -1   19.50   42.30
  12  14  -1   17.20   30.30
  12  14  -1   50.29   42.10
  11  14  -1   11.50   25.90
  11  14  -1    6.40   34.70
  10  14  -1   -2.20   30.30
  10  14  -1  -30.40   20.90
   9  14  -1    9.60   32.90
   9  14  -1   -4.30   26.20
  -9 -14   1  -14.70   23.40
   8  14  -1   -7.10   27.90
   8  14  -1  -33.60   18.80
  -8 -14   1   12.10   24.10
   7  14  -1  -20.30   24.40
   7  14  -1   -3.00   23.40
  -7 -14   1   38.60   25.10
   6  14  -1  -19.20   19.00
  -6 -14   1  -13.10   20.00
   5  14  -1   28.40   23.40
  -5 -14   1   -0.20   20.80
   4  14  -1  -24.90   15.90
  -4 -14   1   37.40   21.90
   3  14  -1   74.69   31.80
   3  14  -1  154.88   23.60
  -3 -14   1  159.78   34.80
   2  14  -1   68.59   27.50
   2  14  -1   35.00   16.70
  -2 -14   1   43.50   22.00
   1  14  -1  109.79   31.40
   1  14  -1  118.09   27.60
  -1 -14   1  146.39   30.40
   0  14  -1  409.06   51.99
   0  14  -1  383.36   55.89
   0 -14   1  492.75   54.59
  -1  14  -1   -0.30   19.30
  -1  14  -1   91.19   30.30
   1 -14   1   17.10   17.30
  -2  14  -1   23.10   20.70
  -2  14  -1    1.50   20.30
   2 -14   1   14.60   16.20
  -3  14  -1  -21.30   20.50
  -3  14  -1  -26.30   20.70
   3 -14   1   20.70   23.20
  -4  14  -1   34.40   25.80
  -4  14  -1   83.09   36.00
   4 -14   1   81.29   27.50
  -5  14  -1    9.60   23.80
  -6  14  -1    4.00   31.60
  -7  14  -1  -10.10   31.30
  -8  14  -1   11.20   31.20
  -9  14  -1   -4.00   34.10
 -10  14  -1    3.70   38.60
  14  13  -1   51.49   49.50
  13  13  -1  -10.20   33.80
  12  13  -1   -8.60   35.50
  11  13  -1   -4.60   24.80
  11  13  -1   34.60   36.30
  10  13  -1  -17.00   25.60
  10  13  -1   40.80   29.50
   9  13  -1   25.50   27.80
   9  13  -1   42.50   28.80
  -9 -13   1    6.10   28.40
   8  13  -1  -17.60   24.30
   8  13  -1    2.50   22.40
  -8 -13   1    7.40   24.90
   7  13  -1   29.80   24.30
   7  13  -1   10.40   27.00
  -7 -13   1   45.20   28.20
   6  13  -1   -2.90   19.00
  -6 -13   1  -11.70   17.10
   5  13  -1  144.39   39.10
  -5 -13   1  184.38   40.90
   4  13  -1  -11.20   19.30
  -4 -13   1   24.40   21.40
   3  13  -1   18.80   21.50
   3  13  -1   23.40   11.90
  -3 -13   1  -26.50   12.90
   2  13  -1  179.88   37.30
   2  13  -1  220.18   29.90
  -2 -13   1  200.28   37.50
   1  13  -1   58.19   26.30
   1  13  -1   57.69   19.60
  -1 -13   1   39.90   19.30
   0  13  -1  199.18   40.10
   0  13  -1  257.27   41.80
   0 -13   1  290.07   40.10
  -1  13  -1   95.69   29.20
  -1  13  -1   89.29   28.50
   1 -13   1   91.19   24.50
  -2  13  -1  -12.00   17.40
  -2  13  -1   -8.20   19.80
   2 -13   1    9.50   15.80
  -3  13  -1   25.00   21.10
  -3  13  -1   38.00   26.00
   3 -13   1   25.20   21.60
  -4  13  -1  -12.30   18.50
  -4  13  -1   -6.50   23.10
   4 -13   1    5.20   24.40
  -5  13  -1   58.79   34.00
  -5  13  -1   19.70   21.20
   5 -13   1  -23.80   18.90
  -6  13  -1   13.90   27.40
  -7  13  -1    3.50   31.60
  -8  13  -1  -38.40   32.30
  -9  13  -1   31.00   40.30
 -10  13  -1  -46.80   30.00
  14  12  -1   22.40   42.50
  13  12  -1  -15.60   27.20
  12  12  -1    2.10   33.50
  11  12  -1   41.50   29.60
  11  12  -1  -20.00   28.60
  10  12  -1   56.09   38.40
  10  12  -1  108.59   34.50
   9  12  -1   44.30   27.50
   9  12  -1   81.19   34.00
  -9 -12   1   43.70   33.10
   8  12  -1   32.30   27.80
   8  12  -1   77.29   32.80
  -8 -12   1   42.00   29.30
   7  12  -1  133.29   40.40
   7  12  -1   87.39   30.30
  -7 -12   1   97.49   32.60
   6  12  -1  136.09   34.40
  -6 -12   1  107.29   35.30
   5  12  -1   17.60   20.30
  -5 -12   1    1.70   18.90
   4  12  -1    1.40   18.10
  -4 -12   1    9.90   17.00
   3  12  -1  231.98   43.00
   3  12  -1  237.18   28.40
  -3 -12   1  368.76   43.60
   2  12  -1   92.19   28.90
   2  12  -1  131.49   22.70
  -2 -12   1  113.29   27.20
   1  12  -1   -6.50   16.80
   1  12  -1   38.30   16.40
  -1 -12   1   42.10   18.30
   0  12  -1  207.08   38.40
   0  12  -1  223.18   35.20
   0 -12   1  255.27   35.60
  -1  12  -1   -4.80   14.70
  -1  12  -1    6.00   18.10
   1 -12   1   11.20   13.80
  -2  12  -1    2.70   16.70
  -2  12  -1    7.20   17.20
   2 -12   1   14.00   16.40
  -3  12  -1  226.88   43.60
  -3  12  -1  118.39   29.20
   3 -12   1  171.08   31.40
  -4  12  -1  -10.80   19.10
  -4  12  -1    3.70   17.20
   4 -12   1   -1.50   16.90
  -5  12  -1    8.80   16.70
  -5  12  -1   26.50   26.50
   5 -12   1    1.00   23.10
  -6  12  -1   -0.30   23.10
   6 -12   1   65.69   30.20
  -7  12  -1   48.90   31.40
  -8  12  -1  -33.20   26.00
  -9  12  -1   35.80   40.90
 -10  12  -1   -7.50   33.30
 -11  12  -1   17.30   44.40
  14  11  -1  -14.30   38.00
  13  11  -1   19.10   39.00
  12  11  -1   35.40   32.40
  11  11  -1    1.10   26.80
  11  11  -1   11.80   23.60
  10  11  -1   50.09   27.80
  10  11  -1   84.09   35.90
   9  11  -1  169.88   46.60
   9  11  -1  212.88   46.20
  -9 -11   1  172.38   46.50
   8  11  -1  135.09   35.60
   8  11  -1  143.69   39.90
  -8 -11   1   95.09   35.60
   7  11  -1   85.29   35.10
   7  11  -1  185.18   39.80
  -7 -11   1  128.19   34.80
   6  11  -1  201.58   42.60
   6  11  -1  290.47   53.99
  -6 -11   1  368.26   51.09
   5  11  -1   35.60   22.10
  -5 -11   1  -14.70   16.70
   4  11  -1   -6.30   16.60
  -4 -11   1    8.40   18.70
   3  11  -1  117.59   29.00
   3  11  -1  107.99   17.30
  -3 -11   1  125.49   28.20
   2  11  -1  185.08   27.10
   2  11  -1  242.08   36.40
  -2 -11   1  219.38   35.00
   1  11  -1  132.59   25.10
   1  11  -1   76.09   26.00
  -1 -11   1   97.59   24.60
   0  11  -1  262.57   36.30
   0  11  -1  209.48   38.70
   0 -11   1  258.87   34.90
  -1  11  -1  597.14   64.89
  -1  11  -1  573.04   63.39
   1 -11   1  601.14   61.59
  -2  11  -1   91.09   26.80
  -2  11  -1   28.90   19.20
   2 -11   1   31.50   17.40
  -3  11  -1  107.19   26.80
  -3  11  -1  112.39   32.60
   3 -11   1  105.69   27.30
  -4  11  -1   85.19   32.50
  -4  11  -1   36.70   19.30
   4 -11   1   49.80   22.10
  -5  11  -1  101.09   34.10
  -5  11  -1   53.39   19.90
   5 -11   1   -6.00   19.00
  -6  11  -1   85.99   38.20
   6 -11   1   81.89   33.20
  -7  11  -1   -4.40   27.00
   7 -11   1  -22.80   28.50
  -8  11  -1  -15.60   24.00
  -9  11  -1    4.60   32.20
 -10  11  -1   58.89   38.20
 -11  11  -1  -35.00   29.50
  14  10  -1   10.00   39.30
  13  10  -1   20.70   33.20
  12  10  -1    3.20   31.90
  11  10  -1   19.00   24.80
  11  10  -1    0.70   26.50
  10  10  -1  101.09   40.60
  10  10  -1   63.99   30.70
   9  10  -1   31.00   22.60
   9  10  -1   19.80   25.40
   8  10  -1  -15.10   16.60
   8  10  -1   19.40   24.40
  -8 -10   1    9.00   23.00
   7  10  -1  152.48   35.40
   7  10  -1  118.09   35.30
  -7 -10   1  133.19   36.50
   6  10  -1  145.29   38.10
   6  10  -1   99.39   28.70
  -6 -10   1   90.29   28.60
   5  10  -1   93.49   27.60
  -5 -10   1  156.88   34.00
   4  10  -1   13.50   17.90
  -4 -10   1   66.39   21.30
   3  10  -1   55.99   22.50
   3  10  -1   91.19   13.60
  -3 -10   1   63.39   21.80
   2  10  -1  159.38   23.60
   2  10  -1  153.08   31.10
  -2 -10   1  207.58   33.00
   1  10  -1  163.58   26.70
   1  10  -1  208.38   36.10
  -1 -10   1  178.08   29.30
   0  10  -1  186.28   32.40
   0  10  -1  212.78   30.60
   0 -10   1  133.59   27.20
  -1  10  -1  163.68   31.10
  -1  10  -1  184.08   32.90
   1 -10   1  200.48   32.60
  -2  10  -1   41.50   18.10
  -2  10  -1   99.09   27.60
   2 -10   1   62.79   19.90
  -3  10  -1  438.36   58.79
  -3  10  -1  537.05   54.09
   3 -10   1  477.55   54.79
  -4  10  -1  356.66   56.39
  -4  10  -1  237.88   37.50
   4 -10   1  287.47   46.70
  -5  10  -1   74.89   29.50
  -5  10  -1   29.00   17.80
   5 -10   1   29.30   25.80
  -6  10  -1   78.79   35.40
   6 -10   1   44.80   28.20
  -7  10  -1   -7.70   22.60
   7 -10   1   10.30   25.20
  -8  10  -1   10.80   26.40
   8 -10   1   39.20   30.70
  -9  10  -1   -9.40   32.00
 -10  10  -1   27.40   37.70
 -11  10  -1   -3.90   33.30
  14   9  -1   -5.00   37.50
  13   9  -1   20.70   34.80
  12   9  -1  -18.10   26.20
  11   9  -1   51.89   35.70
  10   9  -1  108.29   32.70
  10   9  -1  113.29   41.70
   9   9  -1  514.25   63.39
   8   9  -1   61.29   29.60
   8   9  -1   84.09   26.50
  -8  -9   1   27.30   27.20
   7   9  -1  181.98   37.10
   7   9  -1  212.98   43.70
  -7  -9   1  210.28   42.10
   6   9  -1  101.19   33.90
   6   9  -1  118.09   28.80
  -6  -9   1  154.68   34.20
   5   9  -1  222.98   38.70
  -5  -9   1  204.48   39.10
   4   9  -1   61.89   20.10
  -4  -9   1   58.39   21.20
   3   9  -1   74.19   22.80
   3   9  -1   24.50    7.70
  -3  -9   1   32.40    8.70
  -3  -9   1   17.50   17.30
   2   9  -1    8.30    9.40
   2   9  -1    1.20   15.40
  -2  -9   1  -14.80   13.20
   1   9  -1  567.74   65.19
   1   9  -1  695.43   61.09
  -1  -9   1  641.64   64.69
   0   9  -1  409.56   42.40
   0   9  -1  352.66   45.00
   0  -9   1  299.07   46.20
  -1   9  -1    0.40   13.10
  -1   9  -1   28.30   17.50
   1  -9   1   -4.90   13.90
  -2   9  -1  173.88   29.90
  -2   9  -1   82.39   25.30
   2  -9   1  129.69   27.40
  -3   9  -1   28.00   19.40
  -3   9  -1   36.10   16.10
   3  -9   1   42.50   18.90
  -4   9  -1  280.87   36.10
  -4   9  -1  324.87   47.00
   4  -9   1  262.37   43.70
  -5   9  -1  258.97   34.70
  -5   9  -1  332.27   50.99
   5  -9   1  325.07   47.00
  -6   9  -1    6.20   13.10
  -6   9  -1  -19.20   22.80
   6  -9   1   26.80   20.30
  -7   9  -1  -26.20   21.80
   7  -9   1  -11.70   17.40
  -8   9  -1   14.20   29.50
   8  -9   1    9.50   21.10
  -9   9  -1   -4.10   29.80
 -10   9  -1   -9.80   29.70
 -11   9  -1   -6.10   36.80
 -12   9  -1   19.10   36.10
  14   8  -1   11.70   35.30
  13   8  -1   44.70   38.40
  12   8  -1  -19.80   26.00
  11   8  -1   28.00   32.00
  10   8  -1   29.90   26.80
  10   8  -1   43.40   23.50
   9   8  -1    7.30   22.30
   9   8  -1   16.40   18.80
   8   8  -1  236.78   42.70
   8   8  -1  220.98   49.80
  -8  -8   1  250.67   50.89
  -8  -8   1  279.87   31.30
   7   8  -1  780.12   74.19
   7   8  -1  698.93   60.39
   7   8  -1  698.53   80.59
  -7  -8   1  668.93   77.69
  -7  -8   1  637.34   60.09
   6   8  -1  647.64   52.19
   6   8  -1  591.24   71.99
   6   8  -1  598.44   51.79
   6   8  -1  573.64   65.09
  -6  -8   1  578.34   69.19
   5   8  -1  -18.90   13.10
  -5  -8   1    7.00   16.00
   4   8  -1  395.46   46.20
  -4  -8   1  334.77   46.10
   3   8  -1  129.29   12.70
   3   8  -1   84.49   23.00
  -3  -8   1  102.09   24.10
   2   8  -1   84.29   22.30
   2   8  -1   43.80   11.70
  -2  -8   1   68.29   19.80
   1   8  -1  107.49   19.10
   1   8  -1   91.09   23.50
  -1  -8   1  101.29   21.70
   0   8  -1  281.97   36.50
   0   8  -1  329.07   37.00
   0  -8   1  278.47   35.50
  -1   8  -1  604.34   59.79
  -1   8  -1  572.24   60.09
   1  -8   1  617.34   59.49
  -2   8  -1   68.99   20.00
  -2   8  -1  106.69   25.40
   2  -8   1   62.99   30.40
  -3   8  -1  293.87   39.20
  -3   8  -1  190.48   30.90
   3  -8   1  225.08   42.00
  -4   8  -1   55.29   24.40
  -4   8  -1   34.80   14.50
   4  -8   1    7.40   19.10
  -5   8  -1  142.69   36.60
  -5   8  -1   87.09   19.60
   5  -8   1  136.89   28.50
  -6   8  -1   32.20   13.60
  -6   8  -1  -19.40   22.10
   6  -8   1   53.09   22.30
  -7   8  -1  217.28   47.00
   7  -8   1  158.38   36.50
  -8   8  -1   33.40   25.70
   8  -8   1   50.29   26.50
  -9   8  -1   30.20   30.20
   9  -8   1   23.30   23.70
 -10   8  -1  -14.70   25.50
 -11   8  -1   65.09   43.50
 -12   8  -1  -11.10   36.60
  14   7  -1   42.30   38.30
  13   7  -1   -4.50   31.30
  12   7  -1   55.19   36.30
  11   7  -1  139.39   45.80
  10   7  -1   15.90   19.40
  10   7  -1   50.59   30.50
   9   7  -1   58.79   26.20
   9   7  -1   16.40   18.50
  -9  -7   1   14.60   15.50
   8   7  -1   59.19   21.20
   8   7  -1   53.69   25.70
  -8  -7   1   76.59   18.80
   7   7  -1    5.50   18.70
   7   7  -1  -18.40   11.20
  -7  -7   1   -6.80   19.70
  -7  -7   1   13.80   10.10
   6   7  -1   96.09   28.20
   6   7  -1  132.79   17.70
   6   7  -1  195.78   31.80
  -6  -7   1  125.69   17.40
  -6  -7   1   91.09   29.10
   5   7  -1   27.80   22.70
   5   7  -1    4.70    5.60
   5   7  -1  -22.80   11.30
   5   7  -1   22.40    6.40
  -5  -7   1   15.00   16.40
   4   7  -1   52.89   18.20
  -4  -7   1   51.59   19.10
   3   7  -1  325.47   40.20
  -3  -7   1  353.76   42.70
   2   7  -1   94.09   23.30
   2   7  -1  124.59   15.80
  -2  -7   1  116.29   23.70
  -2  -7   1   95.49   14.70
   1   7  -1   26.90   15.90
   1   7  -1   41.60   12.80
  -1  -7   1   52.79   14.90
   0   7  -1   45.40   15.90
   0   7  -1    8.60   13.20
   0  -7   1   67.19   16.70
  -1   7  -1   40.90   16.10
  -1   7  -1   29.60   16.10
   1  -7   1   37.70   14.30
  -2   7  -1 1265.57  110.59
  -2   7  -1 1180.98  105.49
   2  -7   1 1189.48  107.79
  -3   7  -1   -1.40   13.90
  -3   7  -1    7.50   11.80
   3  -7   1   29.30   23.40
  -4   7  -1   28.70   11.90
  -4   7  -1   15.30   17.60
   4  -7   1    0.80   14.40
  -5   7  -1  473.75   57.99
  -5   7  -1  365.96   39.60
   5  -7   1  399.76   47.90
  -6   7  -1   29.60   12.70
  -6   7  -1    9.40   23.50
   6  -7   1   46.90   20.40
  -7   7  -1  101.09   35.90
   7  -7   1  101.89   28.70
  -8   7  -1  203.38   46.00
   8  -7   1   76.49   28.60
  -9   7  -1   51.09   32.30
   9  -7   1   -6.00   18.20
 -10   7  -1  -12.30   25.40
  10  -7   1   16.80   24.50
 -11   7  -1   18.90   36.00
 -12   7  -1  -25.30   31.50
  14   6  -1  -10.30   33.70
  13   6  -1   27.70   30.80
  12   6  -1   24.20   31.90
  11   6  -1   17.50   28.40
  10   6  -1   44.20   28.30
  10   6  -1  -13.70   15.30
 -10  -6   1   23.10   18.10
   9   6  -1   28.50   17.30
   9   6  -1   -6.20   20.20
  -9  -6   1    1.30   14.20
   8   6  -1  138.19   39.30
   8   6  -1  204.08   34.30
  -8  -6   1  190.18   28.50
   7   6  -1  -15.80   14.60
   7   6  -1   35.40   16.00
  -7  -6   1   31.00   24.30
  -7  -6   1   29.20   13.00
   6   6  -1  515.85   55.29
   6   6  -1  345.47   42.80
  -6  -6   1  331.47   36.40
  -6  -6   1  346.27   48.40
   5   6  -1  -10.00    7.80
   5   6  -1   20.30   20.20
   5   6  -1   -3.60   12.80
  -5  -6   1  -10.60   12.70
  -5  -6   1    7.20    7.90
   4   6  -1  862.71   76.49
   4   6  -1  778.82   65.29
   4   6  -1  791.42   65.09
  -4  -6   1  785.82   78.29
   3   6  -1  787.82   76.19
  -3  -6   1  822.62   77.19
   2   6  -1  190.28   27.60
   2   6  -1  174.38   17.90
  -2  -6   1  155.08   17.10
  -2  -6   1  151.38   26.00
   1   6  -1    2.60   13.30
   1   6  -1   -1.80    9.40
  -1  -6   1   15.60   12.30
   0   6  -1   34.00   15.00
   0   6  -1   -0.30   11.50
   0  -6   1   28.10   13.30
  -1   6  -1   21.30   15.40
  -1   6  -1   29.60   13.30
   1  -6   1   42.40   13.70
  -2   6  -1 1026.20   87.79
  -2   6  -1  951.50   82.99
   2  -6   1  846.02   86.29
  -3   6  -1  924.01   84.69
  -3   6  -1  824.62   76.49
   3  -6   1  837.72   80.29
  -4   6  -1   93.59   26.50
  -4   6  -1   96.99   18.90
   4  -6   1  101.19   22.30
  -5   6  -1  164.58   36.80
  -5   6  -1  153.28   20.90
   5  -6   1  127.99   27.80
  -6   6  -1  339.37   32.70
  -6   6  -1  267.67   50.89
   6  -6   1  280.47   42.50
  -7   6  -1  119.59   38.00
   7  -6   1  152.38   32.10
  -8   6  -1   24.00   29.40
   8  -6   1   -4.30   19.80
  -9   6  -1   53.59   33.00
   9  -6   1  101.89   31.80
 -10   6  -1  -11.70   24.80
  10  -6   1   21.40   24.20
 -11   6  -1    0.00   28.30
  11  -6   1   19.60   25.30
 -12   6  -1    7.40   30.80
 -13   6  -1   -4.50   30.40
  14   5  -1   69.09   45.40
  13   5  -1  -17.30   27.50
  12   5  -1    1.80   29.40
  11   5  -1  249.48   56.39
 -11  -5   1  211.98   61.89
  10   5  -1   45.40   28.30
 -10  -5   1  140.19   31.80
   9   5  -1   62.29   29.80
   9   5  -1   49.20   19.20
  -9  -5   1  125.09   27.00
   8   5  -1    5.40   11.50
   8   5  -1   16.90   21.70
  -8  -5   1    3.00   13.30
   7   5  -1   11.30   18.40
   7   5  -1   14.30   12.70
  -7  -5   1   13.30   12.60
   6   5  -1   79.49   24.40
   6   5  -1  116.79   22.80
  -6  -5   1  119.49   21.00
  -6  -5   1  163.28   32.80
   5   5  -1 1811.82  158.78
   5   5  -1 1887.81  165.68
  -5  -5   1 1825.12  153.78
  -5  -5   1 1987.50  165.08
   4   5  -1  104.89   27.60
   4   5  -1  131.39   16.30
   4   5  -1  112.79   22.60
  -4  -5   1  172.98   31.40
  -4  -5   1  137.19   16.30
   3   5  -1   35.40   15.30
   3   5  -1   10.20    5.00
   3   5  -1    4.30    4.20
  -3  -5   1    3.90   13.50
   2   5  -1    4.50   12.40
   2   5  -1    8.40    5.50
  -2  -5   1    4.00    5.10
  -2  -5   1   15.60   13.20
   1   5  -1  115.19   21.40
   1   5  -1   72.39   14.00
  -1  -5   1  153.98   21.40
  -1  -5   1   97.49   14.90
   0   5  -1  711.33   68.39
   0   5  -1  730.73   66.99
   0  -5   1  800.22   67.69
  -1   5  -1    7.10   10.90
  -1   5  -1   -6.60   12.70
   1  -5   1    9.60   10.90
  -2   5  -1  230.98   34.10
  -2   5  -1  165.58   24.00
   2  -5   1  173.78   28.70
  -3   5  -1    8.20   14.00
  -3   5  -1   18.70   10.50
   3  -5   1   20.70   12.40
  -4   5  -1   15.70   15.70
  -4   5  -1   -3.00    8.00
   4  -5   1   19.40   22.60
  -5   5  -1   15.80   10.10
  -5   5  -1    1.90   15.80
   5  -5   1   22.70   14.90
  -6   5  -1  -31.60   13.80
   6  -5   1   -0.40   13.40
  -7   5  -1  -12.90   19.60
   7  -5   1   14.10   16.90
  -8   5  -1  655.63   76.29
   8  -5   1  482.15   63.29
  -9   5  -1   60.99   33.10
   9  -5   1   45.50   24.30
 -10   5  -1  -15.10   27.90
  10  -5   1  -10.10   19.70
 -11   5  -1   -5.60   30.60
  11  -5   1   38.20   30.40
 -12   5  -1  -35.30   30.30
  12  -5   1    0.60   25.40
 -13   5  -1   71.69   40.40
  14   4  -1    2.40   31.70
  13   4  -1  -53.89   26.40
  12   4  -1  -14.30   22.40
  11   4  -1   41.90   28.60
 -11  -4   1   13.40   23.00
  10   4  -1   18.00   26.20
 -10  -4   1   27.80   23.80
   9   4  -1   -5.50   12.50
   9   4  -1    6.30   20.40
  -9  -4   1   15.80   19.50
   8   4  -1   32.80   14.80
   8   4  -1    6.50   19.30
  -8  -4   1    9.40   16.10
   7   4  -1  269.47   42.50
   7   4  -1  194.48   31.20
  -7  -4   1  285.27   34.90
   6   4  -1    9.50   18.00
   6   4  -1   43.70   14.60
  -6  -4   1   13.10   13.00
   5   4  -1   87.79   18.60
   5   4  -1    4.00   15.50
  -5  -4   1   42.60   13.60
  -5  -4   1   43.20   18.70
   4   4  -1 3159.08  276.77
   4   4  -1 3532.25  282.37
  -4  -4   1 3384.06  280.97
  -4  -4   1 3462.75  273.17
   3   4  -1  235.58   21.10
   3   4  -1  193.98   28.40
   3   4  -1  206.88   20.30
  -3  -4   1  193.88   20.50
  -3  -4   1  181.98   30.30
   2   4  -1 3678.23  295.47
   2   4  -1 3805.12  301.47
   2   4  -1 3747.92  295.47
  -2  -4   1 3534.75  295.47
  -2  -4   1 3887.81  302.57
   1   4  -1  168.28   18.10
   1   4  -1  154.48   23.00
  -1  -4   1  167.68   17.80
  -1  -4   1  152.08   23.30
   0   4  -1    9.40   10.60
   0   4  -1   -1.70   10.60
   0  -4   1    4.30    9.10
  -1   4  -1 1323.77  118.09
  -1   4  -1 1430.26  115.49
   1  -4   1 1396.26  118.09
  -2   4  -1    7.50    9.50
  -2   4  -1  -15.70   12.70
   2  -4   1   -4.40    9.20
  -3   4  -1  744.73   61.99
  -3   4  -1  707.03   69.69
   3  -4   1  684.63   66.49
  -4   4  -1   31.50   17.90
  -4   4  -1   -6.10    8.40
   4  -4   1   14.00   12.50
  -5   4  -1  456.15   54.79
   5  -4   1  420.96   49.30
  -6   4  -1  652.73   79.79
   6  -4   1  839.42   78.39
  -7   4  -1   -2.00   18.70
   7  -4   1   -7.40   17.00
  -8   4  -1  129.19   36.20
   8  -4   1  226.08   41.00
  -9   4  -1   16.50   22.60
   9  -4   1   -3.90   19.40
 -10   4  -1  -20.20   20.50
  10  -4   1    1.50   21.10
 -11   4  -1   27.40   27.20
  11  -4   1  -32.60   21.90
 -12   4  -1  -33.20   25.00
  12  -4   1   29.70   28.70
 -13   4  -1   40.10   39.20
  14   3  -1   30.60   35.60
  13   3  -1   50.99   34.20
  12   3  -1  -24.10   26.70
 -12  -3   1  -10.30   23.20
  11   3  -1  106.09   39.30
 -11  -3   1  118.19   34.70
  10   3  -1   11.70   22.30
 -10  -3   1   32.10   22.20
   9   3  -1   38.50   28.20
   9   3  -1  -15.40   11.90
  -9  -3   1    8.80   18.00
   8   3  -1   16.30   18.50
   8   3  -1   14.00   13.60
  -8  -3   1    2.50   14.30
   7   3  -1   36.90   15.00
   7   3  -1    6.50   15.50
  -7  -3   1   48.90   18.50
   6   3  -1   66.49   17.80
   6   3  -1  101.89   26.20
  -6  -3   1   67.79   18.50
   5   3  -1  615.24   65.99
   5   3  -1  583.64   58.99
  -5  -3   1  650.43   66.79
  -5  -3   1  662.23   59.29
   4   3  -1   98.59   23.90
   4   3  -1  109.09   19.10
  -4  -3   1  150.08   26.10
  -4  -3   1  115.89   18.60
   3   3  -1 3613.34  276.67
   3   3  -1 3476.95  279.77
   3   3  -1 3169.68  282.27
  -3  -3   1 3435.06  276.47
  -3  -3   1 3453.25  282.37
   2   3  -1   89.99   11.20
   2   3  -1  108.19   11.90
   2   3  -1   77.79   16.30
  -2  -3   1  108.99   19.80
   1   3  -1 1517.65  120.89
   1   3  -1 1469.35  117.29
  -1  -3   1 1315.37  120.39
  -1  -3   1 1496.85  117.19
   0   3  -1 2665.73  219.08
   0   3  -1 2746.83  219.78
   0  -3   1 2695.23  219.68
   0  -3   1 2759.82  219.18
  -1   3  -1 2993.10  247.58
  -1   3  -1 3147.89  245.08
   1  -3   1 3130.19  248.08
   1  -3   1 2915.61  244.98
  -2   3  -1  132.69   16.10
  -2   3  -1   78.99   20.30
   2  -3   1  117.69   15.30
   2  -3   1   99.39   18.30
  -3   3  -1  349.87   31.60
  -3   3  -1  326.17   41.00
   3  -3   1  361.86   37.20
   3  -3   1  328.17   31.30
  -4   3  -1   22.70    7.90
  -4   3  -1   32.30   16.90
   4  -3   1   25.90   13.20
   4  -3   1   17.70    7.90
  -5   3  -1  142.09   30.10
   5  -3   1  134.79   16.60
   5  -3   1  160.08   28.70
  -6   3  -1  541.15   67.49
   6  -3   1  600.54   52.69
   6  -3   1  624.74   65.19
  -7   3  -1  -33.40   11.40
   7  -3   1   15.00    7.60
   7  -3   1    0.50   16.50
  -8   3  -1  239.58   51.59
   8  -3   1  344.07   49.30
  -9   3  -1  227.58   47.30
   9  -3   1  200.48   43.90
 -10   3  -1  -17.70   20.70
  10  -3   1   -5.90   24.20
 -11   3  -1    4.80   22.90
  11  -3   1   14.10   27.00
 -12   3  -1  -10.60   29.30
  12  -3   1  -17.80   25.60
 -13   3  -1   24.80   37.30
  13  -3   1  -17.30   30.10
  14   2  -1   42.10   39.10
  13   2  -1   12.60   30.50
  12   2  -1   30.20   30.20
 -12  -2   1    8.40   25.30
  11   2  -1   15.60   27.70
 -11  -2   1  -20.50   21.70
  10   2  -1  260.47   52.99
 -10  -2   1  237.08   48.10
   9   2  -1  176.78   41.70
   9   2  -1  142.99   26.80
  -9  -2   1  116.59   30.80
   8   2  -1   -3.40   17.60
   8   2  -1  -14.10    8.10
  -8  -2   1  -17.60   13.70
   7   2  -1  200.38   38.80
   7   2  -1  193.68   28.00
  -7  -2   1  226.78   36.60
   6   2  -1  -15.50    8.10
   6   2  -1    0.90   14.90
  -6  -2   1   16.00   14.20
   5   2  -1  247.18   28.80
   5   2  -1  198.68   34.40
  -5  -2   1  255.37   31.00
   4   2  -1  389.76   45.80
   4   2  -1  446.36   40.70
  -4  -2   1  389.06   40.80
  -4  -2   1  380.86   45.40
   3   2  -1   87.79   16.00
   3   2  -1   82.09   20.90
  -3  -2   1   90.69   20.20
  -3  -2   1  112.19   16.70
   2   2  -1  828.42   65.49
   2   2  -1  786.92   67.59
  -2  -2   1  769.62   65.39
  -2  -2   1  722.13   69.19
   1   2  -1  483.15   39.70
   1   2  -1  424.76   36.20
  -1  -2   1  455.45   42.50
  -1  -2   1  441.16   40.00
  -1  -2   1  418.76   36.20
   0   2  -1  399.86   37.20
   0   2  -1  461.65   37.90
   0  -2   1  415.26   37.20
   0  -2   1  451.75   38.10
   0  -2   1  424.16   37.70
  -1   2  -1  102.09   13.10
  -1   2  -1  107.89   17.50
   1  -2   1  153.58   16.20
   1  -2   1   99.39   13.10
  -2   2  -1 1119.09  100.99
  -2   2  -1 1129.29   95.29
   2  -2   1 1190.18   95.29
   2  -2   1 1266.37   99.89
  -3   2  -1 1824.72  157.68
  -3   2  -1 1880.41  149.79
   3  -2   1 1957.30  156.78
   3  -2   1 1809.22  149.79
  -4   2  -1  655.33   67.79
   4  -2   1  710.53   67.09
   4  -2   1  694.23   57.49
  -5   2  -1  884.81   84.79
   5  -2   1  873.71   84.19
   5  -2   1  881.11   73.19
  -6   2  -1   21.80   18.50
   6  -2   1   11.20    6.40
   6  -2   1   20.10    7.20
   6  -2   1    5.70   15.90
  -7   2  -1   40.10   24.40
   7  -2   1   39.80    9.50
   7  -2   1   49.50   21.60
  -8   2  -1    5.00   21.10
   8  -2   1   48.10   24.00
  -9   2  -1   48.40   27.20
   9  -2   1   16.90   23.80
 -10   2  -1  -36.10   20.10
  10  -2   1  -18.70   20.90
 -11   2  -1   26.90   27.70
  11  -2   1   25.20   27.40
 -12   2  -1    0.40   28.30
  12  -2   1   -5.80   30.20
 -13   2  -1   21.30   31.30
  13  -2   1   19.00   34.60
 -14   2  -1  -23.00   32.50
  14  -2   1  -10.70   34.80
  14   1  -1  -20.60   31.30
  13   1  -1   52.29   37.40
 -13  -1   1   27.10   31.10
  12   1  -1  140.99   47.10
 -12  -1   1  107.39   38.60
  11   1  -1   16.40   28.30
 -11  -1   1   -9.00   21.80
  10   1  -1    7.70   22.90
 -10  -1   1  -14.20   19.00
   9   1  -1   58.19   28.50
  -9  -1   1   37.10   24.10
   8   1  -1   49.99   23.40
   8   1  -1   26.30   13.40
  -8  -1   1   64.29   23.70
   7   1  -1  267.67   32.10
   7   1  -1  299.97   42.40
  -7  -1   1  220.38   36.70
   6   1  -1  185.08   25.90
   6   1  -1  227.98   34.40
  -6  -1   1  175.88   32.00
   5   1  -1   53.09   13.50
   5   1  -1   16.30   15.90
  -5  -1   1   33.50   15.80
   4   1  -1   63.99   13.80
   4   1  -1   49.40   16.10
  -4  -1   1   56.79   16.20
   3   1  -1  221.38   23.50
   3   1  -1  246.58   28.60
  -3  -1   1  164.48   28.30
  -3  -1   1  182.28   24.80
   2   1  -1  460.25   37.30
   2   1  -1  386.26   37.00
   2   1  -1  293.57   38.70
  -2  -1   1  404.86   39.70
  -2  -1   1  468.95   37.80
  -2  -1   1  419.56   38.90
   1   1  -1 1980.80  150.98
   1   1  -1 1908.81  152.48
   1   1  -1 1812.22  151.88
   1   1  -1 1841.92  150.78
  -1  -1   1 1845.82  150.88
  -1  -1   1 1861.81  151.88
  -1  -1   1 1899.61  152.48
   0   1  -1  325.77   23.50
   0  -1   1  202.28   23.20
   0  -1   1  274.57   23.30
  -1   1  -1  128.69   10.40
  -1   1  -1  127.99   14.90
  -1   1  -1   75.49   13.60
   1  -1   1   88.49   13.20
   1  -1   1   97.09   10.40
  -2   1  -1    0.00   11.40
   2  -1   1    3.20    9.20
   2  -1   1   -6.10    3.00
  -3   1  -1  461.25   49.40
   3  -1   1  515.25   41.70
   3  -1   1  499.35   49.60
  -4   1  -1   76.09   20.90
   4  -1   1  104.09   21.50
   4  -1   1   70.69    9.90
   4  -1   1   64.69   10.20
  -5   1  -1  -31.40   11.50
   5  -1   1   10.10    5.90
   5  -1   1   -3.00   13.50
   5  -1   1   -8.20    5.80
  -6   1  -1 1304.47  125.39
   6  -1   1 1461.35  127.89
   6  -1   1 1385.56  113.79
  -7   1  -1   62.99   24.70
   7  -1   1   54.99   12.00
   7  -1   1   81.09   25.80
  -8   1  -1   -0.20   18.70
   8  -1   1   46.30   24.90
  -9   1  -1   22.60   24.50
   9  -1   1   60.09   29.30
 -10   1  -1    0.40   24.50
  10  -1   1   79.99   34.30
 -11   1  -1  -25.60   21.50
  11  -1   1    1.80   24.30
 -12   1  -1  150.88   46.20
  12  -1   1  227.98   54.79
 -13   1  -1   14.00   31.40
  13  -1   1  -32.20   26.60
 -14   1  -1  -31.70   33.00
  14  -1   1   -0.10   34.50
  14   0  -1    7.90   34.00
  13   0  -1   67.39   41.00
 -13   0   1   18.50   31.60
  12   0  -1   48.60   31.40
 -12   0   1  118.69   38.70
  11   0  -1  -13.10   25.10
 -11   0   1  -30.00   23.30
  10   0  -1   52.69   28.70
 -10   0   1   46.60   28.00
   9   0  -1   -4.20   20.20
  -9   0   1   25.90   20.60
   8   0  -1   14.50   12.30
   8   0  -1   40.60   21.40
  -8   0   1   14.70   20.00
   7   0  -1   -5.40    8.50
   7   0  -1   -6.00   14.60
  -7   0   1    4.00   16.00
   6   0  -1  274.57   40.90
   6   0  -1  291.07   32.40
  -6   0   1  341.97   41.30
   5   0  -1  303.57   38.50
   5   0  -1  287.97   31.20
  -5   0   1  276.47   36.50
   4   0  -1   52.29   15.70
   4   0  -1   38.50   11.60
  -4   0   1   62.99   17.60
   3   0  -1  296.37   35.40
  -3   0   1  399.46   37.30
   2   0  -1 2079.49  171.98
  -2   0   1 2129.69  171.78
   1   0  -1   60.59    9.20
   1   0  -1   49.10    8.70
  -1   0   1   69.59   10.10
  -1   0   1   62.99    9.50
   0   0  -1   -7.80    2.90
   0   0  -1   -2.90    4.20
   0   0   1   -3.20    3.60
  -1   0  -1 2903.11  227.68
   1   0   1 2753.72  227.88
   1   0   1 2860.61  227.68
  -2   0  -1 1725.23  134.09
   2   0   1 1574.24  129.59
   2   0   1 1597.64  134.39
  -3   0  -1   48.70   15.80
   3   0   1   80.59   18.00
   3   0   1   79.39   10.40
  -4   0  -1  508.95   52.39
   4   0   1  522.35   45.10
   4   0   1  532.45   53.79
  -5   0  -1  466.65   47.40
   5   0   1  397.06   37.20
   5   0   1  379.56   47.20
  -6   0  -1  687.73   69.99
   6   0   1  654.33   59.19
   6   0   1  757.12   73.09
  -7   0  -1  876.41   79.49
   7   0   1  758.82   79.19
   7   0   1  677.03   63.39
  -8   0  -1  -10.30   15.20
   8   0   1    2.70   10.80
   8   0   1   41.40   22.60
  -9   0  -1   30.50   23.30
   9   0   1    9.90   24.30
 -10   0  -1   48.90   29.40
  10   0   1  123.89   38.40
 -11   0  -1   14.40   28.70
  11   0   1   -9.70   23.60
 -12   0  -1   15.10   26.90
  12   0   1  -17.50   29.30
 -13   0  -1   42.10   35.10
  13   0   1   37.40   36.00
 -14   0  -1   16.00   37.20
  14   0   1  -47.10   24.00
  14  -1  -1    2.40   35.00
 -14   1   1   13.30   36.20
  13  -1  -1   13.40   33.40
 -13   1   1   22.90   30.70
  12  -1  -1   -2.60   26.80
 -12   1   1  -35.50   23.70
  11  -1  -1  -28.30   20.30
 -11   1   1   35.30   29.30
  10  -1  -1   33.20   25.70
 -10   1   1   27.30   23.30
   9  -1  -1   42.60   26.20
  -9   1   1   24.90   23.40
   8  -1  -1  120.89   21.40
   8  -1  -1  130.89   32.30
  -8   1   1  111.49   32.70
   7  -1  -1   -0.40    9.90
   7  -1  -1   16.00   15.60
  -7   1   1  -20.50   12.80
   6  -1  -1   86.79   22.40
   6  -1  -1   50.59   13.50
  -6   1   1   33.40   19.90
   5  -1  -1  334.27   41.60
  -5   1   1  372.96   42.80
   4  -1  -1  255.07   31.40
  -4   1   1  234.18   31.90
   3  -1  -1    3.80   10.30
  -3   1   1   64.99   17.90
   2  -1  -1 1883.41  146.39
   2  -1  -1 1703.83  148.09
  -2   1   1 1838.92  149.59
   1  -1  -1 2423.06  197.08
   1  -1  -1 2459.05  196.98
  -1   1   1 2517.55  197.18
  -1   1   1 2553.74  198.88
  -1   1   1 2349.96  196.98
   0   1   1 1499.55  120.69
  -1  -1  -1   64.09    8.00
  -1  -1  -1   58.09    7.90
  -1  -1  -1   71.99   10.10
   1   1   1   82.79    8.40
   1   1   1   46.40    7.50
   1   1   1   55.79    9.30
  -2  -1  -1   10.40    8.00
  -2  -1  -1   -3.00    5.80
   2   1   1   -7.30    6.00
   2   1   1    5.00    5.10
   2   1   1   19.10   10.10
  -3  -1  -1  103.19   14.20
  -3  -1  -1  100.79   18.20
   3   1   1  120.39   20.10
   3   1   1   92.59   13.60
  -4  -1  -1 1126.29  102.89
   4   1   1 1197.98   98.69
   4   1   1 1257.47  106.79
  -5  -1  -1 1367.96  118.39
   5   1   1 1365.96  112.29
   5   1   1 1305.77  121.59
  -6  -1  -1   23.40   16.00
   6   1   1   16.10   16.20
   6   1   1    2.90    7.30
  -7  -1  -1   19.60   18.00
   7   1   1    7.00    8.70
   7   1   1   -5.50   14.00
  -8  -1  -1    7.10   16.90
   8   1   1    2.60   19.90
   8   1   1  -13.70    8.80
  -9  -1  -1   29.70   21.80
   9   1   1   56.09   29.30
 -10  -1  -1  120.99   35.50
  10   1   1   86.59   33.10
 -11  -1  -1   89.79   34.40
  11   1   1   62.69   36.90
 -12  -1  -1   51.49   32.80
  12   1   1   46.40   31.80
 -13  -1  -1   31.70   31.30
  13   1   1  -11.00   27.70
  14   1   1   -5.30   31.60
 -14   2   1   30.10   37.70
  13  -2  -1   33.80   37.20
 -13   2   1   33.40   36.60
  12  -2  -1   12.50   28.10
 -12   2   1  -33.50   23.20
  11  -2  -1  -18.90   23.40
 -11   2   1   49.20   30.70
  10  -2  -1    2.10   22.80
 -10   2   1   42.30   26.20
   9  -2  -1   41.70   24.30
  -9   2   1   24.70   27.30
   8  -2  -1  184.58   39.50
  -8   2   1  187.78   41.60
   7  -2  -1  228.18   36.40
   7  -2  -1  183.58   24.10
  -7   2   1  111.69   32.30
   6  -2  -1  944.81   87.69
  -6   2   1  841.42   88.09
   5  -2  -1   31.80   15.30
  -5   2   1   67.39   22.00
   4  -2  -1   90.39   20.10
  -4   2   1  125.09   24.40
   3  -2  -1  690.13   59.99
  -3   2   1  656.83   56.29
  -3   2   1  567.04   61.19
   2  -2  -1   51.59   11.90
   2  -2  -1   50.79   10.80
  -2   2   1   37.40   10.10
  -2   2   1   54.59   14.50
   1  -2  -1  279.97   24.80
  -1   2   1  264.07   24.80
   0  -2  -1 2998.90  225.68
   0  -2  -1 2762.72  226.98
   0  -2  -1 2833.92  227.48
   0   2   1 2713.93  227.18
   0   2   1 2687.43  226.98
   0   2   1 2949.10  225.58
  -1  -2  -1  887.31   68.19
  -1  -2  -1  873.21   70.79
  -1  -2  -1  745.53   70.69
   1   2   1  730.63   70.49
   1   2   1  899.31   70.79
   1   2   1  862.61   70.39
   1   2   1  853.71   68.09
  -2  -2  -1   23.50    7.60
  -2  -2  -1   38.70    9.80
   2   2   1   37.90    9.00
   2   2   1   25.20    7.20
   2   2   1   28.40   12.40
  -3  -2  -1  552.74   46.70
   3   2   1  512.65   45.40
   3   2   1  431.56   49.99
  -4  -2  -1    9.10   11.40
   4   2   1   16.00    9.20
   4   2   1   32.00   16.20
  -5  -2  -1    0.00   10.70
   5   2   1    6.00    7.80
   5   2   1   14.60   15.80
  -6  -2  -1   92.59   23.40
   6   2   1   92.69   16.40
   6   2   1   69.99   22.70
  -7  -2  -1  241.78   37.60
   7   2   1  252.07   45.10
   7   2   1  251.97   29.20
  -8  -2  -1    0.30   14.80
   8   2   1    6.50   10.40
   8   2   1   10.10   18.80
  -9  -2  -1   -8.50   16.60
   9   2   1   23.70   21.80
 -10  -2  -1   -7.50   19.00
  10   2   1   -7.00   22.30
 -11  -2  -1   92.09   32.00
  11   2   1    2.50   26.20
 -12  -2  -1    5.90   27.10
  12   2   1  -54.69   20.60
 -13  -2  -1  -66.59   21.70
  13   2   1    3.60   30.40
  14   2   1  -50.39   25.20
 -13   3   1  -34.90   29.30
  12  -3  -1   -3.80   26.70
 -12   3   1  -28.10   27.40
  11  -3  -1   63.89   31.60
 -11   3   1   56.49   36.10
  10  -3  -1   -9.70   22.70
 -10   3   1   16.50   28.90
   9  -3  -1    7.90   21.00
  -9   3   1   18.00   22.30
   8  -3  -1  -16.30   14.60
  -8   3   1   18.60   22.50
   7  -3  -1    1.00   14.80
  -7   3   1   -3.50   18.70
   6  -3  -1  235.98   34.10
  -6   3   1  161.58   34.80
   5  -3  -1   38.20   16.20
  -5   3   1   62.79   22.20
   4  -3  -1  116.19   22.70
  -4   3   1  166.58   20.30
  -4   3   1  154.98   30.40
   3  -3  -1   -3.30    9.20
  -3   3   1   10.80   13.80
  -3   3   1    1.40    8.50
   2  -3  -1   58.69   12.10
  -2   3   1   49.70   12.30
  -2   3   1   37.10   15.60
   1  -3  -1  411.86   33.60
  -1   3   1  407.26   33.40
  -1   3   1  292.37   37.00
  -1   3   1  315.07   35.10
   0  -3  -1 1563.94  120.29
   0  -3  -1 1348.77  121.39
   0   3   1 1490.85  122.49
   0   3   1 1565.44  120.29
   0   3   1 1429.86  121.59
  -1  -3  -1    5.30    4.70
  -1  -3  -1    4.90    7.80
  -1  -3  -1    9.50    4.80
   1   3   1   15.70    8.40
   1   3   1   17.10    5.30
   1   3   1    1.90    8.60
  -2  -3  -1  242.78   31.60
  -2  -3  -1  310.57   25.00
   2   3   1  274.97   24.60
   2   3   1  270.57   30.20
  -3  -3  -1  502.85   54.19
  -3  -3  -1  558.54   47.70
   3   3   1  526.65   53.69
   3   3   1  564.64   47.60
   3   3   1  535.25   49.90
  -4  -3  -1  134.69   19.40
   4   3   1  126.79   18.70
   4   3   1   95.09   24.90
  -5  -3  -1 1168.98   98.59
   5   3   1 1064.19   96.69
   5   3   1 1174.18  105.69
  -6  -3  -1   12.30   14.60
   6   3   1    2.50   14.90
   6   3   1   20.50   11.20
  -7  -3  -1  -10.90   12.00
   7   3   1  -10.10    7.40
   7   3   1   -0.60   15.70
  -8  -3  -1   44.40   18.30
   8   3   1   -7.90   18.20
   8   3   1    6.00   11.20
  -9  -3  -1   14.00   19.50
   9   3   1   25.60   23.10
   9   3   1   -4.40   17.60
 -10  -3  -1   -6.60   16.60
  10   3   1    2.60   23.30
 -11  -3  -1   70.09   28.60
  11   3   1  -38.70   21.40
 -12  -3  -1    7.20   25.10
  12   3   1   12.90   27.00
  13   3   1  -61.49   27.40
  14   3   1   14.10   35.20
 -13   4   1    8.80   31.60
  12  -4  -1   -1.80   27.20
 -12   4   1   29.60   37.90
  11  -4  -1    3.80   23.70
 -11   4   1  -23.80   26.10
  10  -4  -1    5.40   23.10
 -10   4   1   83.59   33.10
   9  -4  -1  -18.30   17.40
  -9   4   1   23.30   27.40
   8  -4  -1   92.79   28.40
  -8   4   1  127.39   36.20
   7  -4  -1  566.14   62.49
  -7   4   1  484.05   63.99
   6  -4  -1   -0.30   12.00
  -6   4   1   25.60   21.80
   5  -4  -1  135.29   25.60
  -5   4   1  135.39   31.30
   4  -4  -1  718.13   68.89
  -4   4   1  777.92   74.49
  -4   4   1  731.03   65.39
   3  -4  -1    1.40    8.20
  -3   4   1    1.50    9.50
  -3   4   1   -8.70   14.00
   2  -4  -1   80.29   13.90
  -2   4   1   78.39   15.30
  -2   4   1   87.29   20.70
   1  -4  -1   11.10    9.90
  -1   4   1   -0.70   10.90
  -1   4   1   23.60   13.70
  -1   4   1   13.30    8.20
   0  -4  -1  121.69   16.30
   0   4   1  123.69   19.10
   0   4   1  126.19   18.80
   0   4   1  126.19   16.00
  -1  -4  -1 1809.02  155.98
  -1  -4  -1 1948.01  153.58
   1   4   1 1820.42  156.98
   1   4   1 2000.00  153.78
  -2  -4  -1  484.15   48.70
   2   4   1  517.25   50.59
   2   4   1  495.75   48.00
  -3  -4  -1  153.48   16.50
  -3  -4  -1  158.98   26.70
   3   4   1  144.99   26.00
   3   4   1  165.38   24.00
   3   4   1  154.28   16.00
  -4  -4  -1  651.03   68.79
  -4  -4  -1  690.93   60.39
   4   4   1  692.13   69.29
   4   4   1  740.93   63.89
  -5  -4  -1  147.99   21.80
   5   4   1  172.28   32.00
   5   4   1  157.58   24.10
  -6  -4  -1  537.65   51.89
   6   4   1  477.35   49.99
   6   4   1  526.25   60.39
  -7  -4  -1   13.80   13.10
   7   4   1    7.60   17.00
   7   4   1    1.10   10.50
  -8  -4  -1   20.60   15.40
   8   4   1    1.00   20.00
   8   4   1   40.10   14.90
  -9  -4  -1    9.60   16.80
   9   4   1   -0.70   11.90
   9   4   1    6.90   23.40
 -10  -4  -1   22.80   19.40
  10   4   1   -0.80   22.00
 -11  -4  -1  380.26   54.09
  11   4   1  299.77   61.99
  12   4   1  -10.10   29.00
  13   4   1   23.90   33.10
  14   4   1   16.50   35.30
 -13   5   1   28.80   39.00
 -12   5   1   24.10   36.40
  11  -5  -1    0.00   26.00
 -11   5   1   31.40   30.40
  10  -5  -1  -33.00   17.90
 -10   5   1  -19.20   23.20
   9  -5  -1   18.80   24.20
  -9   5   1    5.00   26.30
   8  -5  -1  -20.80   13.00
  -8   5   1  -23.30   19.70
   7  -5  -1  144.29   31.00
  -7   5   1  164.98   39.40
   6  -5  -1   27.30   17.00
  -6   5   1   22.30   19.40
   5  -5  -1  225.78   31.40
  -5   5   1  203.98   25.80
  -5   5   1  161.98   35.90
   4  -5  -1   69.79   20.80
  -4   5   1   53.99   23.50
  -4   5   1   31.60   12.70
   3  -5  -1  241.08   28.00
  -3   5   1  224.88   33.80
  -3   5   1  222.88   27.40
   2  -5  -1  250.97   30.10
  -2   5   1  318.97   36.50
  -2   5   1  291.37   32.10
   1  -5  -1   69.29   12.50
  -1   5   1   37.20   15.10
  -1   5   1   53.69   15.10
   0  -5  -1  203.28   23.70
   0   5   1  185.38   26.90
   0   5   1  225.68   26.20
  -1  -5  -1  302.57   32.00
  -1  -5  -1  254.17   27.40
   1   5   1  364.16   35.10
   1   5   1  266.37   28.00
  -2  -5  -1  640.94   59.09
  -2  -5  -1  603.34   50.79
  -2  -5  -1  625.84   50.69
   2   5   1  632.74   58.99
  -3  -5  -1 1003.00   92.89
   3   5   1 1054.49   91.79
   3   5   1 1038.20   94.49
  -4  -5  -1   12.90   15.20
  -4  -5  -1   15.20    7.60
   4   5   1    0.10    5.60
   4   5   1   23.20   12.70
   4   5   1   15.20   15.10
  -5  -5  -1   90.69   15.70
   5   5   1   61.19   21.80
   5   5   1   64.19   18.20
  -6  -5  -1  137.69   21.10
   6   5   1  118.99   22.80
   6   5   1  134.99   31.20
  -7  -5  -1   96.59   20.20
   7   5   1   99.69   20.80
   7   5   1   31.50   22.20
  -8  -5  -1   38.00   17.80
   8   5   1   50.49   24.60
   8   5   1   33.40   15.30
  -9  -5  -1   -4.70   15.00
   9   5   1  -10.90   19.60
   9   5   1    5.90   13.90
 -10  -5  -1    9.20   17.80
  10   5   1   15.20   28.00
 -11  -5  -1   12.50   21.30
  11   5   1   -2.20   25.10
  12   5   1    4.30   25.30
  13   5   1    5.10   35.00
  14   5   1   -5.10   31.40
 -13   6   1   -8.40   32.40
 -12   6   1   97.09   46.80
 -11   6   1  -20.70   27.60
  10  -6  -1   27.40   25.70
 -10   6   1   -9.30   19.80
   9  -6  -1   38.40   23.70
  -9   6   1   -3.10   23.40
   8  -6  -1   43.20   22.60
  -8   6   1   22.60   29.10
   7  -6  -1  123.89   27.90
  -7   6   1   53.79   30.40
   6  -6  -1   52.29   18.90
  -6   6   1    1.00   11.50
  -6   6   1   16.10   23.10
   5  -6  -1   50.49   16.10
  -5   6   1   31.90   24.60
  -5   6   1   32.60   13.40
   4  -6  -1   54.49   16.10
  -4   6   1   54.89   15.70
  -4   6   1   45.20   21.10
   3  -6  -1   72.99   16.00
  -3   6   1    4.40   16.00
  -3   6   1   83.89   24.40
   2  -6  -1  391.66   45.10
  -2   6   1  490.65   49.50
  -2   6   1  457.95   45.50
   1  -6  -1   66.59   12.80
  -1   6   1   31.10   16.80
  -1   6   1   66.69   16.80
   0  -6  -1  271.17   28.60
   0   6   1  222.58   29.40
   0   6   1  282.07   33.20
  -1  -6  -1  136.99   22.30
   1   6   1  150.08   25.20
   1   6   1  143.69   19.60
  -2  -6  -1   58.49   16.50
  -2  -6  -1   35.70    8.10
   2   6   1   49.40    8.70
   2   6   1   78.69   18.80
  -3  -6  -1   85.69   20.90
   3   6   1   59.89   17.90
  -4  -6  -1  997.70   92.19
   4   6   1 1020.30   89.79
   4   6   1  911.31   92.49
  -5  -6  -1   11.80   15.80
  -5  -6  -1   56.69   11.10
   5   6   1   73.99   23.80
   5   6   1   50.39   17.10
  -6  -6  -1  197.58   23.50
   6   6   1  172.08   37.30
   6   6   1  163.18   29.00
  -7  -6  -1   39.20   14.50
   7   6   1   27.80   21.50
   7   6   1   42.70   16.50
  -8  -6  -1   37.80   14.80
   8   6   1   31.40   16.80
   8   6   1   18.20   23.30
  -9  -6  -1   34.90   16.50
   9   6   1   39.60   20.00
   9   6   1   35.70   23.60
 -10  -6  -1    1.20   17.60
  10   6   1   13.60   24.50
  11   6   1    3.40   27.70
  12   6   1  -18.50   28.30
  13   6   1   -1.10   33.30
  14   6   1   24.90   39.70
 -12   7   1   15.60   30.50
 -11   7   1   -0.30   30.90
 -10   7   1   12.50   33.00
   9  -7  -1   23.70   21.40
  -9   7   1   37.50   32.50
   8  -7  -1  122.79   31.00
  -8   7   1  133.39   39.90
   7  -7  -1  100.89   26.30
  -7   7   1  167.28   44.40
   6  -7  -1   -5.00   13.20
  -6   7   1   14.90   12.10
  -6   7   1  -12.30   18.60
   5  -7  -1   79.09   20.40
  -5   7   1   70.29   18.20
  -5   7   1  115.99   30.70
   4  -7  -1   -6.50   11.40
  -4   7   1    1.80   10.70
  -4   7   1   -9.20   13.30
   3  -7  -1  528.45   57.59
  -3   7   1  428.86   49.60
  -3   7   1  605.24   59.69
   2  -7  -1  215.28   28.30
  -2   7   1  225.38   30.10
  -2   7   1  225.88   33.30
   1  -7  -1  193.08   24.90
  -1   7   1  251.37   30.70
  -1   7   1  183.28   30.20
   0  -7  -1  232.98   28.40
   0   7   1  215.38   32.70
   0   7   1  264.57   30.30
  -1  -7  -1   73.79   17.60
   1   7   1  117.39   17.80
   1   7   1   97.39   21.30
  -2  -7  -1  350.56   39.30
  -2  -7  -1  350.06   31.60
   2   7   1  336.77   31.70
   2   7   1  321.47   40.80
  -3  -7  -1  511.75   54.69
   3   7   1  514.85   53.29
  -4  -7  -1    2.90   15.20
   4   7   1   24.10   15.70
   4   7   1   16.10   18.60
  -5  -7  -1  186.28   33.60
  -5  -7  -1  175.98   16.60
   5   7   1  153.18   17.00
   5   7   1  139.09   31.30
   5   7   1  166.68   29.70
  -6  -7  -1  579.04   71.69
  -6  -7  -1  715.73   58.49
   6   7   1  592.34   72.19
   6   7   1  669.53   67.49
  -7  -7  -1  133.69   22.00
   7   7   1  159.38   30.90
   7   7   1  176.38   37.40
  -8  -7  -1    4.00   11.40
   8   7   1   -5.50   18.60
   8   7   1    0.20   13.50
  -9  -7  -1  131.39   25.70
   9   7   1   68.19   31.70
   9   7   1   87.89   25.00
  10   7   1    7.00   18.00
  10   7   1  -26.90   20.60
  11   7   1  -13.80   27.90
  12   7   1   24.50   30.90
  13   7   1  -19.30   28.10
  14   7   1  -27.20   33.70
 -12   8   1   35.70   41.70
 -11   8   1   34.70   33.70
 -10   8   1  -13.00   23.20
  -9   8   1   19.70   29.50
   8  -8  -1   -0.20   17.70
  -8   8   1   32.50   30.20
   7  -8  -1   21.00   19.20
  -7   8   1    7.90   24.80
   6  -8  -1   -5.60   13.60
  -6   8   1   42.70   26.40
  -6   8   1   47.90   16.60
   5  -8  -1  169.68   29.60
  -5   8   1   82.49   32.50
  -5   8   1  137.49   24.70
   4  -8  -1   60.09   19.90
  -4   8   1   62.59   18.00
  -4   8   1   78.69   27.00
   3  -8  -1   50.99   22.60
  -3   8   1   48.10   20.70
  -3   8   1   33.00   16.60
   2  -8  -1  860.41   86.29
  -2   8   1  918.91   85.79
  -2   8   1  857.81   81.29
   1  -8  -1  547.35   52.29
  -1   8   1  506.95   55.79
  -1   8   1  598.64   58.09
   0  -8  -1   48.00   13.80
   0   8   1   36.60   15.90
   0   8   1    8.70   12.70
  -1  -8  -1   92.39   20.60
   1   8   1  134.49   20.80
   1   8   1  148.19   27.90
  -2  -8  -1   -9.70   11.40
   2   8   1    9.90    8.40
   2   8   1    4.20   14.20
  -3  -8  -1   30.30   17.40
   3   8   1   23.60   18.00
  -4  -8  -1  120.39   26.60
   4   8   1   98.69   23.50
   4   8   1  132.49   30.20
  -5  -8  -1   47.10   20.60
   5   8   1   70.29   23.00
   5   8   1   61.29   25.00
  -6  -8  -1    1.90    5.10
  -6  -8  -1  -18.00   13.90
   6   8   1   18.60   15.40
   6   8   1    3.60   18.50
   6   8   1   -0.50    5.60
  -7  -8  -1    1.60    8.10
   7   8   1   17.70   20.80
   7   8   1   -3.30   14.60
  -8  -8  -1   37.90   14.40
   8   8   1   65.39   29.30
   8   8   1   53.69   22.10
   9   8   1    8.60   25.80
   9   8   1   24.60   19.30
  10   8   1  254.47   42.10
  10   8   1  193.18   46.10
  11   8   1  -39.70   22.80
  12   8   1  -33.10   26.90
  13   8   1  -17.60   29.40
  14   8   1    9.30   35.90
 -12   9   1   33.60   37.70
 -11   9   1  -17.30   29.50
 -10   9   1  -15.70   26.10
  -9   9   1  -21.40   20.60
  -8   9   1   57.09   33.90
   7  -9  -1   -6.60   15.80
  -7   9   1   41.10   29.60
   6  -9  -1   76.69   24.90
  -6   9   1   71.19   20.50
  -6   9   1  157.98   41.90
   5  -9  -1  -10.40   14.40
  -5   9   1   -0.10   18.50
  -5   9   1   20.30   14.50
   4  -9  -1   -4.90   15.70
  -4   9   1   17.10   18.00
  -4   9   1    1.00   12.30
   3  -9  -1   94.29   22.10
  -3   9   1   83.69   21.00
  -3   9   1  101.09   28.20
   2  -9  -1  200.18   29.20
  -2   9   1  171.08   33.30
  -2   9   1  204.78   33.20
   1  -9  -1 1423.26  120.29
  -1   9   1 1266.47  122.39
  -1   9   1 1458.85  123.59
   0  -9  -1  532.95   53.39
   0   9   1  483.65   54.29
   0   9   1  632.54   60.19
  -1  -9  -1   30.10   14.40
   1   9   1   19.50   12.20
   1   9   1    9.90   17.20
  -2  -9  -1   29.40   15.10
   2   9   1    2.80    8.70
   2   9   1  -16.20   13.80
  -3  -9  -1  340.07   33.80
  -3  -9  -1  355.86   33.10
  -3  -9  -1  397.96   45.70
   3   9   1  446.06   49.30
   3   9   1  403.76   33.10
  -4  -9  -1    7.70   14.70
   4   9   1   28.40   18.80
  -5  -9  -1  193.08   36.70
   5   9   1  245.88   41.60
   5   9   1  171.38   33.60
  -6  -9  -1   20.90   18.10
   6   9   1   14.80   16.80
   6   9   1   13.30   21.20
  -7  -9  -1  320.67   53.99
   7   9   1  258.77   50.39
   7   9   1  309.37   43.20
   8   9   1   -7.30   19.50
   8   9   1  -28.10   12.70
   9   9   1   22.50   22.10
   9   9   1   49.80   28.30
  10   9   1   15.10   20.60
  10   9   1   -7.30   24.90
  11   9   1  -16.40   22.90
  12   9   1   12.70   29.80
  13   9   1    9.90   33.60
  14   9   1    0.50   33.20
 -11  10   1   10.30   33.60
 -10  10   1   12.30   32.00
  -9  10   1   -6.20   30.40
  -8  10   1   28.40   28.00
   7 -10  -1   -9.20   27.30
  -7  10   1  -29.10   21.00
   6 -10  -1   16.90   22.10
  -6  10   1    0.30   22.10
  -6  10   1   -7.90   13.70
   5 -10  -1  -10.50   17.30
  -5  10   1   18.90   15.00
  -5  10   1   17.20   24.80
   4 -10  -1  -26.30   15.00
  -4  10   1   43.20   16.90
  -4  10   1    4.90   19.70
   3 -10  -1  227.18   31.90
  -3  10   1  230.68   42.20
  -3  10   1  195.58   34.00
   2 -10  -1   22.90   13.40
  -2  10   1   53.09   19.90
  -2  10   1   21.00   17.00
   1 -10  -1   55.99   18.20
  -1  10   1  136.99   27.10
  -1  10   1   97.99   26.60
   0 -10  -1  238.28   29.70
   0  10   1  182.88   32.30
   0  10   1  202.48   35.50
  -1 -10  -1  194.38   30.30
   1  10   1  189.08   29.10
   1  10   1  177.58   34.80
  -2 -10  -1  142.39   26.20
   2  10   1  157.68   21.40
   2  10   1  100.89   29.00
  -3 -10  -1  111.39   17.20
  -3 -10  -1  152.68   28.90
   3  10   1  110.89   14.80
   3  10   1  164.18   30.40
  -4 -10  -1   99.99   26.90
   4  10   1  146.69   28.70
  -5 -10  -1   50.39   23.50
   5  10   1   30.10   20.50
   5  10   1   -2.20   17.90
  -6 -10  -1   50.09   24.40
   6  10   1   69.19   28.20
   6  10   1   73.19   25.80
  -7 -10  -1   35.70   24.70
   7  10   1   24.00   19.30
   7  10   1   31.60   23.10
   8  10   1  284.17   56.19
   8  10   1  330.67   50.69
   9  10   1    9.70   19.70
   9  10   1   -0.80   25.50
  10  10   1  334.07   49.99
  10  10   1  381.66   69.69
  11  10   1   39.50   30.00
  12  10   1   74.49   38.50
  13  10   1   -3.50   31.40
  14  10   1   10.50   40.70
 -11  11   1   -5.80   33.50
 -10  11   1   25.60   33.40
  -9  11   1   -3.80   32.70
  -8  11   1    9.80   28.70
  -7  11   1    3.30   25.30
   6 -11  -1    1.20   31.50
  -6  11   1  -17.90   23.80
  -6  11   1   36.80   20.50
   5 -11  -1   -9.20   16.30
  -5  11   1    2.90   21.20
  -5  11   1   29.00   17.00
   4 -11  -1   -8.50   15.10
  -4  11   1   13.20   23.80
  -4  11   1   20.70   16.70
   3 -11  -1   54.89   20.30
  -3  11   1  112.19   26.30
  -3  11   1   69.59   28.30
   2 -11  -1  116.19   21.70
  -2  11   1  119.49   26.80
  -2  11   1   18.20   19.70
   1 -11  -1    3.60   11.80
  -1  11   1    2.40   15.90
  -1  11   1    5.10   15.10
   0 -11  -1   33.40   14.70
   0  11   1   50.59   19.50
   0  11   1   39.40   21.20
  -1 -11  -1  267.27   35.80
   1  11   1  276.77   34.70
   1  11   1  283.97   42.50
  -2 -11  -1   60.69   20.40
   2  11   1   85.39   18.00
   2  11   1   94.19   25.10
  -3 -11  -1  886.11   89.59
   3  11   1  948.51   78.89
   3  11   1  923.11   92.19
  -4 -11  -1  210.28   36.10
   4  11   1  105.09   29.40
  -5 -11  -1   33.20   20.70
   5  11   1   36.30   20.90
   5  11   1    3.70   19.30
  -6 -11  -1  230.98   46.30
   6  11   1  272.57   50.29
   6  11   1  322.27   49.00
  -7 -11  -1   18.80   21.70
   7  11   1    8.60   19.70
   7  11   1   46.00   25.40
   8  11   1  -21.30   16.20
   8  11   1   25.90   26.00
   9  11   1  159.38   36.90
   9  11   1  120.39   38.70
  10  11   1   72.19   28.00
  10  11   1  114.69   41.90
  11  11   1   23.10   33.30
  11  11   1   17.70   22.80
  12  11   1   -7.10   29.80
  13  11   1  -38.80   29.50
  14  11   1   -4.40   39.60
 -11  12   1    4.80   39.30
 -10  12   1  -10.10   36.30
  -9  12   1  -16.80   27.20
  -8  12   1    4.20   31.90
  -7  12   1  -23.00   22.00
  -6  12   1   24.30   26.80
   5 -12  -1  106.19   46.90
  -5  12   1   62.69   22.90
  -5  12   1   44.30   29.90
   4 -12  -1   13.50   16.90
  -4  12   1    5.20   23.40
  -4  12   1   16.20   17.70
   3 -12  -1  102.09   23.90
  -3  12   1   82.79   33.10
  -3  12   1   97.99   26.80
   2 -12  -1   19.70   16.90
  -2  12   1   34.90   21.70
  -2  12   1   54.39   26.60
   1 -12  -1   71.69   19.00
  -1  12   1   78.29   25.90
  -1  12   1  199.58   35.30
   0 -12  -1  231.18   34.10
   0  12   1  271.77   39.10
   0  12   1  334.17   44.60
  -1 -12  -1   62.99   20.20
   1  12   1   67.79   24.60
   1  12   1  146.49   24.70
  -2 -12  -1  524.85   57.29
   2  12   1  479.05   60.99
   2  12   1  536.45   51.89
  -3 -12  -1  254.97   37.10
   3  12   1  176.08   37.70
   3  12   1  245.68   26.90
  -4 -12  -1   35.90   21.00
   4  12   1   11.10   16.50
  -5 -12  -1  330.87   46.40
   5  12   1  204.68   40.60
   5  12   1  177.68   41.70
  -6 -12  -1   21.00   22.40
   6  12   1   68.59   24.70
   6  12   1   81.09   30.40
  -7 -12  -1    2.60   20.00
   7  12   1  -14.40   17.20
   7  12   1    1.50   23.20
  -8 -12  -1   67.49   32.30
   8  12   1   45.70   27.00
   8  12   1   50.89   32.20
   9  12   1   -8.90   18.50
   9  12   1   40.60   29.20
  10  12   1    0.00   21.70
  10  12   1  -25.80   22.50
  11  12   1   42.70   27.60
  11  12   1   54.49   34.50
  12  12   1   -4.50   29.50
  13  12   1  -31.10   30.40
  14  12   1   -3.30   36.20
 -10  13   1   -1.00   34.00
  -9  13   1    0.00   35.20
  -8  13   1  -13.40   28.70
  -7  13   1  -27.00   27.20
  -6  13   1  -14.90   22.90
  -5  13   1   17.50   25.20
  -5  13   1    0.70   19.90
   4 -13  -1  185.38   54.79
  -4  13   1  219.98   49.99
  -4  13   1  180.98   37.30
   3 -13  -1   64.59   21.10
  -3  13   1   53.09   30.00
  -3  13   1   72.89   25.70
   2 -13  -1   39.20   16.20
  -2  13   1   32.00   21.00
  -2  13   1    6.70   21.20
   1 -13  -1  193.48   30.40
  -1  13   1  128.89   33.10
  -1  13   1  157.78   37.10
   0 -13  -1  179.18   30.60
   0  13   1   99.79   34.10
   0  13   1  183.98   33.30
  -1 -13  -1  367.76   42.00
   1  13   1  242.38   46.00
   1  13   1  260.17   38.20
  -2 -13  -1  327.17   43.30
   2  13   1  321.27   48.80
   2  13   1  296.57   36.90
  -3 -13  -1  202.88   35.30
   3  13   1  141.69   22.60
   3  13   1  200.28   40.00
  -4 -13  -1  207.28   38.50
   4  13   1  179.68   39.10
  -5 -13  -1  167.38   37.80
   5  13   1  121.09   34.70
  -6 -13  -1   44.10   25.60
   6  13   1   54.49   30.20
   6  13   1   -8.90   20.50
  -7 -13  -1   41.60   24.40
   7  13   1  -30.30   17.90
   7  13   1  -21.60   22.20
  -8 -13  -1  -29.50   19.20
   8  13   1  -42.60   17.00
   8  13   1   10.40   25.30
   9  13   1   57.09   29.30
   9  13   1   74.79   35.20
  10  13   1    9.20   29.40
  10  13   1   16.90   25.50
  11  13   1  -19.50   28.10
  11  13   1    1.90   24.30
  12  13   1   26.40   37.20
  13  13   1  -24.10   30.40
  14  13   1   26.30   45.20
 -10  14   1   30.90   45.00
  -9  14   1   53.39   38.90
  -8  14   1   -8.80   26.30
  -7  14   1  -52.79   24.30
  -6  14   1   10.50   27.90
  -5  14   1   13.70   26.40
  -5  14   1  -14.70   17.20
  -4  14   1    0.40   22.50
  -4  14   1   50.19   24.50
   3 -14  -1  126.29   40.20
  -3  14   1   76.09   31.60
  -3  14   1  138.29   35.40
   2 -14  -1   -0.40   12.70
  -2  14   1  -18.30   17.60
  -2  14   1   -7.10   21.00
   1 -14  -1   81.09   20.40
  -1  14   1   61.29   25.50
  -1  14   1   25.70   25.10
   0 -14  -1   45.80   18.40
   0  14   1  -11.80   15.20
   0  14   1   10.80   22.30
  -1 -14  -1   14.20   16.60
   1  14   1   12.50   20.20
   1  14   1   27.40   16.00
  -2 -14  -1  346.07   45.20
   2  14   1  287.27   37.80
   2  14   1  321.57   48.50
  -3 -14  -1   77.29   25.30
   3  14   1  117.89   20.70
   3  14   1   80.99   30.30
  -4 -14  -1  151.38   35.40
   4  14   1  102.29   31.00
  -5 -14  -1   16.60   21.20
   5  14   1   28.20   24.30
  -6 -14  -1   33.60   24.60
   6  14   1   43.80   28.60
   6  14   1  -39.20   18.90
  -7 -14  -1   -4.40   21.10
   7  14   1   -6.50   23.70
   7  14   1  -11.20   20.60
  -8 -14  -1   72.59   35.30
   8  14   1   79.69   29.00
   8  14   1   95.29   38.90
   9  14   1   22.00   29.50
   9  14   1   -8.50   21.00
  10  14   1   24.70   33.30
  10  14   1    5.00   27.30
  11  14   1    6.80   32.90
  11  14   1  -20.50   23.20
  12  14   1    6.60   35.70
  13  14   1    1.10   41.50
  14  14   1   -3.90   40.40
  -9  15   1  -59.09   29.80
  -8  15   1  -32.10   28.90
  -7  15   1   86.89   43.70
  -6  15   1   26.20   30.80
  -5  15   1  -15.70   24.80
  -5  15   1  -13.60   26.70
  -4  15   1   92.99   31.10
  -4  15   1   81.19   35.20
  -3  15   1   35.30   27.10
  -3  15   1   14.20   22.70
   2 -15  -1   -8.40   19.40
  -2  15   1   36.00   26.00
  -2  15   1  -28.90   17.20
   1 -15  -1   41.80   16.20
  -1  15   1   -6.10   20.30
  -1  15   1   -9.80   20.80
   0 -15  -1   45.00   21.00
   0  15   1  112.59   29.90
   0  15   1   23.60   27.40
  -1 -15  -1   -0.40   17.60
   1  15   1   22.30   19.90
   1  15   1   38.60   25.30
  -2 -15  -1  102.89   28.10
   2  15   1  126.19   26.60
   2  15   1  110.89   34.70
  -3 -15  -1   71.79   26.50
   3  15   1   49.80   18.20
   3  15   1   51.09   29.10
  -4 -15  -1  129.29   35.00
   4  15   1   37.40   24.80
  -5 -15  -1  -14.40   19.90
   5  15   1   57.69   28.40
  -6 -15  -1   40.10   27.00
   6  15   1   95.49   36.80
   6  15   1   99.79   34.50
  -7 -15  -1   44.50   28.10
   7  15   1   -9.30   21.70
   7  15   1   25.90   28.30
  -8 -15  -1  -10.60   23.30
   8  15   1   -7.60   25.60
   8  15   1  -16.10   22.40
  -9 -15  -1   11.20   29.60
   9  15   1  -36.60   26.00
   9  15   1   -9.50   24.30
  10  15   1   16.60   30.50
  10  15   1  -36.00   21.90
  11  15   1    0.10   27.60
  11  15   1   -4.10   33.80
  12  15   1  -21.70   33.20
  13  15   1   20.90   43.50
  -9  16   1    3.20   39.30
  -8  16   1    2.10   31.10
  -7  16   1   -1.20   33.40
  -6  16   1   17.00   39.80
  -5  16   1   29.40   36.80
  -4  16   1  -21.70   19.10
  -4  16   1  -24.30   25.20
  -3  16   1   41.60   28.70
  -3  16   1   55.09   29.30
  -2  16   1   11.10   27.20
  -2  16   1   40.50   30.10
   1 -16  -1   49.80   20.80
  -1  16   1   35.20   26.60
  -1  16   1    5.00   22.30
   0 -16  -1   31.40   21.30
   0  16   1   41.60   30.60
   0  16   1  105.09   29.60
  -1 -16  -1   16.10   17.90
   1  16   1   11.50   18.70
   1  16   1    5.80   26.20
  -2 -16  -1  152.08   35.50
   2  16   1  142.39   41.30
   2  16   1  201.48   33.60
  -3 -16  -1    4.10   19.00
   3  16   1  -23.60   16.30
  -4 -16  -1   17.40   24.30
   4  16   1   58.89   27.30
  -5 -16  -1   42.90   27.00
   5  16   1   83.99   33.70
  -6 -16  -1  -17.20   21.10
   6  16   1   43.50   30.00
   6  16   1   71.09   32.90
  -7 -16  -1    0.40   22.40
   7  16   1  -41.50   22.40
   7  16   1   10.20   26.50
  -8 -16  -1  113.19   42.70
   8  16   1  107.09   41.00
   8  16   1   95.09   39.40
  -9 -16  -1    0.70   28.30
   9  16   1   -7.40   28.30
   9  16   1   25.30   28.30
  10  16   1   -5.10   27.50
  10  16   1   29.90   29.60
  11  16   1   -3.70   36.20
  11  16   1    8.30   29.20
  12  16   1  -11.60   28.50
  12  16   1   32.80   43.20
  13  16   1    5.60   44.40
  -8  17   1  -20.90   31.80
  -7  17   1  -10.90   33.60
  -6  17   1   43.20   40.40
  -5  17   1   18.60   31.10
  -4  17   1   40.30   26.20
  -4  17   1   39.40   32.80
  -3  17   1   24.80   25.60
  -3  17   1   -5.00   25.80
  -2  17   1  -27.10   19.70
  -2  17   1   20.80   25.50
  -1  17   1   56.29   27.50
  -1  17   1  100.69   35.60
   0 -17  -1  113.19   29.40
   0  17   1   58.79   30.90
   0  17   1   83.39   30.20
  -1 -17  -1    2.50   17.60
   1  17   1   45.80   23.70
   1  17   1    6.60   25.70
  -2 -17  -1   20.10   23.00
   2  17   1   -1.60   22.90
  -3 -17  -1   24.80   23.80
   3  17   1   29.30   27.90
  -4 -17  -1   -9.20   18.90
   4  17   1  -17.80   20.30
  -5 -17  -1   81.39   32.70
   5  17   1   -9.20   23.20
  -6 -17  -1    6.00   24.60
   6  17   1   45.40   26.70
   6  17   1   14.50   28.60
  -7 -17  -1  121.89   40.20
   7  17   1  110.69   45.60
   7  17   1  243.18   51.99
  -8 -17  -1   35.90   27.60
   8  17   1   -6.20   25.10
   8  17   1   16.30   28.80
  -9 -17  -1    4.30   28.10
   9  17   1   54.29   32.50
   9  17   1   18.60   35.40
  10  17   1   56.79   39.80
  10  17   1  -25.60   24.80
  11  17   1  -15.50   33.90
  11  17   1  110.89   42.10
  12  17   1    4.60   28.90
  12  17   1    7.00   37.70
  13  17   1  -47.10   38.30
  -7  18   1  -16.80   30.80
  -6  18   1   -8.60   30.20
  -5  18   1  -14.80   30.80
  -4  18   1   44.10   30.50
  -4  18   1  -14.10   28.40
  -3  18   1   40.30   28.10
  -3  18   1   48.60   36.50
  -2  18   1   10.80   25.80
  -2  18   1  -14.90   26.40
  -1  18   1   11.80   27.30
  -1  18   1    0.00   24.20
   0  18   1   -6.10   27.50
   0  18   1  -32.50   22.10
  -1 -18  -1   11.40   19.90
   1  18   1   10.20   29.90
   1  18   1   17.30   22.50
  -2 -18  -1   16.80   21.20
   2  18   1  -20.00   26.60
  -3 -18  -1  -11.80   20.10
   3  18   1   17.10   29.60
  -4 -18  -1   22.10   25.70
   4  18   1  -27.90   25.00
  -5 -18  -1   39.10   26.90
   5  18   1   26.50   27.80
  -6 -18  -1   36.90   26.90
   6  18   1   16.90   32.20
   6  18   1    3.30   24.50
  -7 -18  -1  -36.30   23.10
   7  18   1   79.19   35.20
   7  18   1   -6.30   24.10
  -8 -18  -1    0.70   25.80
   8  18   1   54.19   38.80
   8  18   1  -10.10   28.60
  -9 -18  -1  -25.60   27.20
   9  18   1   15.20   36.00
   9  18   1   11.80   29.00
  10  18   1   74.79   37.00
  10  18   1   38.90   37.60
  11  18   1    4.20   26.80
  11  18   1  -33.00   32.60
  12  18   1  117.39   53.39
  12  18   1   -6.40   28.60
  -7  19   1  -39.10   36.90
  -6  19   1   -6.10   38.20
  -5  19   1  -14.40   33.80
  -4  19   1   41.70   36.60
  -3  19   1   22.10   28.50
  -3  19   1  -10.20   29.70
  -2  19   1  -12.70   30.30
  -2  19   1  -26.50   27.70
  -1  19   1   33.80   32.00
  -1  19   1   18.60   27.40
   0  19   1   18.10   27.30
   0  19   1   46.10   29.50
   1  19   1  -23.00   23.50
  -2 -19  -1    7.30   24.10
   2  19   1    4.80   30.80
  -3 -19  -1    8.90   24.70
   3  19   1    2.40   29.60
  -4 -19  -1    5.90   23.80
   4  19   1  -21.90   24.40
  -5 -19  -1   26.20   27.10
   5  19   1  -25.30   21.60
  -6 -19  -1  105.99   38.70
   6  19   1   43.50   34.20
   6  19   1   85.39   38.10
  -7 -19  -1   22.10   31.00
   7  19   1   -1.90   33.30
   7  19   1   -3.10   24.60
  -8 -19  -1   36.60   30.90
   8  19   1  -20.90   30.60
   8  19   1   58.79   36.00
  -9 -19  -1  -33.30   27.90
   9  19   1   -9.00   31.60
   9  19   1   62.19   34.80
  10  19   1   71.59   39.60
  10  19   1   50.69   44.10
  11  19   1   30.00   39.10
  11  19   1   -4.10   28.50
  12  19   1  -40.20   37.10
  12  19   1   64.09   39.20
  -6  20   1  -38.70   33.50
  -5  20   1   17.40   43.00
  -4  20   1    8.30   34.30
  -3  20   1   -3.10   26.60
  -3  20   1  -17.70   28.10
  -2  20   1  -20.00   28.00
  -2  20   1   16.40   32.00
  -1  20   1  -32.50   25.60
  -1  20   1   23.70   30.90
   0  20   1   29.20   28.50
   1  20   1  -25.80   27.00
   2  20   1  -12.80   29.50
  -3 -20  -1  -20.60   20.60
   3  20   1  -14.70   23.80
  -4 -20  -1   45.40   29.00
   4  20   1   20.00   27.20
  -5 -20  -1   16.30   28.80
   5  20   1   27.40   26.90
  -6 -20  -1   15.80   28.30
   6  20   1  -33.90   28.20
   6  20   1   14.80   31.40
  -7 -20  -1   63.19   39.40
   7  20   1  -10.20   29.80
   7  20   1   44.10   31.90
  -8 -20  -1    1.80   29.70
   8  20   1   40.80   38.00
   8  20   1   45.20   31.90
  -9 -20  -1   44.70   38.00
   9  20   1  -21.80   34.40
   9  20   1   -1.90   30.80
  10  20   1   26.80   40.10
  10  20   1   23.30   32.70
  11  20   1  -33.20   37.20
  11  20   1   20.30   34.90
  -5  21   1  -28.00   35.90
  -4  21   1  -12.60   34.30
  -3  21   1   36.80   32.80
  -3  21   1  -32.10   29.50
  -2  21   1   -0.40   31.20
  -2  21   1   40.10   34.30
  -1  21   1   -8.00   29.50
   0  21   1   25.80   36.50
   1  21   1   -8.50   27.30
   2  21   1   27.90   34.30
   3  21   1   27.40   34.50
  -4 -21  -1   28.40   31.50
   4  21   1   18.70   32.40
  -5 -21  -1   -0.60   28.50
   5  21   1   -9.60   29.70
  -6 -21  -1   53.99   38.00
   6  21   1   27.20   38.10
   6  21   1   28.90   36.30
  -7 -21  -1   19.30   35.30
   7  21   1  -16.20   31.80
   7  21   1    1.90   36.50
  -8 -21  -1   -8.80   25.60
   8  21   1   31.70   40.90
   8  21   1  -41.30   29.70
  -9 -21  -1   -1.40   35.00
   9  21   1   16.20   38.50
   9  21   1  -33.60   31.50
  10  21   1   11.50   37.70
  10  21   1  -57.29   30.30
  11  21   1    7.40   35.70
  11  21   1   20.50   47.90
  -4  22   1   14.10   37.10
  -3  22   1   -3.30   32.00
  -2  22   1  -14.90   32.40
  -1  22   1  -25.90   31.10
   0  22   1   -0.20   30.80
   1  22   1  -39.40   27.70
   2  22   1  -29.00   29.50
   3  22   1    3.10   35.80
   4  22   1  -81.49   25.60
   5  22   1  -17.20   32.30
   5  22   1  -19.70   32.80
  -6 -22  -1   27.40   32.90
   6  22   1   36.20   34.60
   6  22   1   40.80   38.80
  -7 -22  -1   26.50   37.30
   7  22   1  -18.30   35.40
   7  22   1  -34.00   33.20
  -8 -22  -1   50.09   38.60
   8  22   1   44.10   40.90
   8  22   1   46.30   38.80
  -9 -22  -1   38.40   41.70
   9  22   1   47.40   44.70
   9  22   1   81.89   43.30
  10  22   1   -2.50   32.80
  10  22   1   44.00   41.00
  -2  23   1  -32.70   28.80
  -1  23   1  -19.90   35.60
   0  23   1  -44.40   31.10
   1  23   1    3.20   32.40
   2  23   1   19.70   34.10
   3  23   1   62.99   40.80
   4  23   1   29.90   44.50
   5  23   1   -5.30   46.40
   5  23   1  -58.29   28.80
   6  23   1   25.50   36.40
   6  23   1   -3.00   35.50
  -7 -23  -1   30.00   36.70
   7  23   1    0.10   31.70
   7  23   1   19.00   37.90
  -8 -23  -1   28.80   40.40
   8  23   1  -12.40   28.60
   8  23   1   -4.50   38.80
  -9 -23  -1   33.50   37.70
   9  23   1  -28.70   33.50
   9  23   1    4.10   45.10
  -1  24   1  106.19   52.89
   0  24   1    2.30   35.50
   1  24   1  -69.59   28.40
   2  24   1   61.09   42.90
   3  24   1    2.90   36.30
   4  24   1  -23.70   34.60
   5  24   1   45.50   45.90
   6  24   1  -35.40   32.70
   7  24   1    6.20   34.80
   7  24   1   12.30   39.80
  -8 -24  -1  -27.60   36.00
   8  24   1  -13.00   39.90
   8  24   1   34.70   40.40
   1  25   1    1.50   39.90
   2  25   1  -25.00   37.60
   3  25   1   43.20   43.90
   4  25   1   37.80   43.30
   5  25   1  -22.30   31.60
   6  25   1  -43.20   41.80
   5  25  -2   -0.40   36.40
   4  25  -2  -10.20   40.60
   3  25  -2   40.00   44.30
   2  25  -2  -40.70   36.80
   1  25  -2  -37.20   33.60
   8  24  -2   -3.10   43.00
   7  24  -2  -28.10   32.40
   7  24  -2   16.30   41.70
  -7 -24   2  -30.50   31.70
   6  24  -2   60.19   44.00
  -6 -24   2   -9.90   33.30
   5  24  -2    4.90   35.70
   4  24  -2   -6.20   33.60
   3  24  -2   21.30   41.50
   2  24  -2   73.19   47.70
   1  24  -2  -10.50   39.80
   0  24  -2   13.20   35.80
  -1  24  -2   -7.50   37.90
   9  23  -2  -23.70   40.00
   9  23  -2   49.20   39.90
  -9 -23   2    4.90   36.00
   8  23  -2   33.40   35.90
   8  23  -2  -40.00   37.80
  -8 -23   2   25.40   39.40
   7  23  -2   38.10   38.10
   7  23  -2    7.00   38.20
  -7 -23   2   11.20   35.30
   6  23  -2   32.00   40.40
  -6 -23   2   26.40   37.20
   5  23  -2   23.40   38.10
  -5 -23   2   26.30   31.70
   4  23  -2  -46.50   28.80
   3  23  -2  -25.20   31.20
   2  23  -2  -18.20   34.70
   1  23  -2    7.00   35.80
   0  23  -2   -0.60   33.90
  -1  23  -2   -6.80   36.00
  10  22  -2   -7.60   44.10
  10  22  -2   19.60   41.00
 -10 -22   2  -38.50   37.10
   9  22  -2  -37.20   37.30
   9  22  -2   13.60   36.30
  -9 -22   2   -5.70   33.30
   8  22  -2   15.40   39.20
   8  22  -2  -23.60   41.70
  -8 -22   2   26.40   38.30
   7  22  -2    0.60   35.60
   7  22  -2   23.00   43.00
  -7 -22   2  -25.20   30.60
   6  22  -2    1.30   28.90
  -6 -22   2   -9.30   31.70
   5  22  -2   29.80   34.40
  -5 -22   2  -10.90   29.10
   4  22  -2   45.80   38.90
  -4 -22   2  -19.60   28.10
   3  22  -2  -16.30   27.90
   2  22  -2   48.00   35.50
   1  22  -2   44.10   41.00
   0  22  -2  -18.60   30.20
  -1  22  -2   15.50   36.30
  -2  22  -2  -13.10   33.60
  -3  22  -2    7.00   35.50
  -4  22  -2  -32.40   32.30
  10  21  -2   -4.80   36.10
  10  21  -2   32.40   46.90
 -10 -21   2    9.70   36.80
   9  21  -2   39.00   40.00
   9  21  -2  -32.70   35.80
  -9 -21   2  -20.70   33.10
   8  21  -2   -8.90   30.30
   8  21  -2  -20.00   38.50
  -8 -21   2   -4.40   30.70
   7  21  -2  -14.00   28.70
   7  21  -2  -49.60   29.90
  -7 -21   2  -24.10   30.00
   6  21  -2   -5.00   31.70
  -6 -21   2  131.39   45.40
   5  21  -2  -21.50   22.50
  -5 -21   2  -11.30   29.50
   4  21  -2   78.69   34.60
  -4 -21   2   29.10   31.10
   3  21  -2   32.80   34.30
  -3 -21   2   68.59   35.70
   2  21  -2  -11.90   27.80
   1  21  -2    5.10   33.70
   0  21  -2  -16.30   29.30
  -1  21  -2   10.80   31.70
  -2  21  -2   17.00   32.10
  -2  21  -2    8.00   36.10
  -3  21  -2  -54.69   28.50
  -4  21  -2   18.30   38.90
  -5  21  -2   29.60   38.30
  11  20  -2  -33.10   38.00
  11  20  -2  -25.90   31.60
 -11 -20   2   11.70   40.20
  10  20  -2   -2.50   39.40
  10  20  -2   29.10   36.90
 -10 -20   2  -74.99   27.10
   9  20  -2   -8.00   33.10
   9  20  -2  -10.00   34.30
  -9 -20   2  -18.70   32.70
   8  20  -2  -17.90   30.00
   8  20  -2    8.00   38.20
  -8 -20   2   45.40   38.60
   7  20  -2   49.40   32.70
   7  20  -2   20.00   36.40
  -7 -20   2  -11.90   30.60
   6  20  -2  -17.40   29.00
  -6 -20   2    0.50   26.20
   5  20  -2  -52.09   23.90
  -5 -20   2   -3.70   25.80
   4  20  -2  -21.80   23.50
  -4 -20   2    0.90   23.50
   3  20  -2   49.10   33.90
  -3 -20   2  -38.20   24.80
   2  20  -2   41.70   32.20
  -2 -20   2    2.00   26.50
   1  20  -2   32.90   33.10
   0  20  -2   15.40   30.90
  -1  20  -2   -2.10   28.70
  -1  20  -2  -11.90   27.50
  -2  20  -2  -23.10   25.40
  -2  20  -2   41.10   35.50
  -3  20  -2    7.40   35.50
  -3  20  -2   -6.40   30.50
  -4  20  -2   21.00   37.00
  -5  20  -2   -2.70   32.80
  -6  20  -2   10.70   38.90
  12  19  -2    8.60   39.00
  12  19  -2  -34.50   30.40
  11  19  -2   20.30   33.80
  11  19  -2   -8.40   42.40
 -11 -19   2  -12.90   36.30
  10  19  -2   24.30   36.30
  10  19  -2   22.40   43.80
 -10 -19   2  -36.30   29.20
   9  19  -2    8.30   29.70
   9  19  -2   16.10   39.30
  -9 -19   2  -20.60   28.50
   8  19  -2   28.10   36.80
   8  19  -2   -6.20   24.60
  -8 -19   2  -41.80   25.10
   7  19  -2    6.60   31.50
  -7 -19   2  -42.00   22.10
   6  19  -2   83.99   39.80
  -6 -19   2  117.59   42.40
   5  19  -2   34.10   30.80
  -5 -19   2   21.10   28.40
   4  19  -2   84.49   35.50
  -4 -19   2   17.60   25.90
   3  19  -2    2.80   22.00
  -3 -19   2   16.10   26.80
   2  19  -2   14.00   27.70
  -2 -19   2  -21.30   21.70
   1  19  -2   79.79   37.20
  -1 -19   2  132.29   39.00
   0  19  -2   17.00   29.00
   0  19  -2   11.20   25.20
  -1  19  -2  -20.30   25.10
  -1  19  -2  -13.50   25.10
  -2  19  -2  -25.60   25.70
  -2  19  -2   -4.30   26.20
  -3  19  -2   16.90   30.40
  -3  19  -2  -28.20   25.20
  -4  19  -2  -27.40   29.30
  -5  19  -2   35.80   38.90
  -6  19  -2   82.39   42.80
  12  18  -2   15.90   40.00
  12  18  -2  -31.60   32.10
  11  18  -2   68.69   38.80
  11  18  -2   47.60   43.80
 -11 -18   2  -16.50   32.70
  10  18  -2  -21.40   31.70
  10  18  -2   16.70   33.10
 -10 -18   2  -33.10   31.50
   9  18  -2   -5.50   28.90
   9  18  -2    1.70   36.70
  -9 -18   2   34.50   34.30
   8  18  -2   -4.70   30.80
   8  18  -2   42.40   40.30
  -8 -18   2    4.40   29.00
   7  18  -2  -11.30   29.90
  -7 -18   2  -15.60   27.00
   6  18  -2   37.80   32.40
  -6 -18   2  -14.50   22.90
   5  18  -2   63.99   33.70
  -5 -18   2  163.78   43.50
   4  18  -2    6.90   28.20
  -4 -18   2   35.50   25.60
   3  18  -2  -28.80   23.10
  -3 -18   2   36.50   26.20
   2  18  -2    8.30   26.50
  -2 -18   2   19.00   24.80
   1  18  -2    9.70   22.40
  -1 -18   2   21.20   25.20
   0  18  -2   -8.80   24.40
   0  18  -2    3.00   22.80
   0 -18   2   51.49   28.40
  -1  18  -2    0.50   24.90
  -1  18  -2   38.10   30.20
  -2  18  -2   23.30   25.10
  -2  18  -2   48.60   30.60
  -3  18  -2   21.00   29.70
  -3  18  -2  -18.70   28.30
  -4  18  -2   -4.30   28.00
  -5  18  -2  -52.39   29.10
  -6  18  -2  -21.50   29.30
  -7  18  -2    5.60   41.70
  12  17  -2  -34.40   30.00
  12  17  -2  -23.20   39.30
  11  17  -2   -1.20   31.00
  11  17  -2  -16.10   36.20
  10  17  -2  -12.30   34.60
  10  17  -2   36.80   30.70
 -10 -17   2  -30.60   32.10
   9  17  -2  -49.20   29.30
   9  17  -2  -32.70   21.60
  -9 -17   2   -1.70   27.60
   8  17  -2    6.80   35.90
   8  17  -2   27.50   28.70
  -8 -17   2  -19.70   22.50
   7  17  -2   22.30   24.10
  -7 -17   2  -10.80   24.30
   6  17  -2   99.99   34.10
  -6 -17   2   21.80   27.20
   5  17  -2   -3.80   24.00
  -5 -17   2   17.00   24.30
   4  17  -2   -5.10   21.40
  -4 -17   2   35.70   26.40
   3  17  -2   -2.10   21.20
  -3 -17   2   60.39   28.60
   2  17  -2  119.69   36.80
  -2 -17   2  148.09   39.10
   1  17  -2   16.80   21.80
   1  17  -2    2.40   23.60
  -1 -17   2   52.89   25.90
   0  17  -2   65.99   29.90
   0  17  -2   26.40   23.50
   0 -17   2   16.60   20.90
  -1  17  -2   29.70   24.40
  -1  17  -2   15.80   28.00
   1 -17   2   29.20   22.20
  -2  17  -2   36.70   27.70
  -2  17  -2   14.70   27.10
  -3  17  -2  -28.20   22.20
  -3  17  -2   26.90   27.80
  -4  17  -2   14.00   30.10
  -5  17  -2   11.40   35.20
  -6  17  -2   18.00   33.90
  -7  17  -2   51.29   42.00
  -8  17  -2   -3.40   30.50
  13  16  -2  -24.80   38.30
  12  16  -2  -45.40   26.50
  12  16  -2    6.80   39.90
  11  16  -2    8.30   35.30
  11  16  -2   13.80   28.10
  10  16  -2   -5.40   28.00
  10  16  -2   17.90   32.40
 -10 -16   2   20.50   31.60
   9  16  -2  -10.60   26.20
   9  16  -2   -8.10   31.30
  -9 -16   2  -29.50   26.40
   8  16  -2   17.40   33.40
   8  16  -2   -0.60   26.40
  -8 -16   2   19.10   28.00
   7  16  -2   -3.40   27.50
  -7 -16   2   39.70   31.20
   6  16  -2   69.69   35.60
  -6 -16   2   46.20   28.70
   5  16  -2   23.10   26.20
  -5 -16   2   47.10   28.40
   4  16  -2  109.49   36.10
  -4 -16   2  181.58   44.10
   3  16  -2   20.40   24.50
  -3 -16   2   23.50   22.50
   2  16  -2   93.49   31.90
   2  16  -2    6.90   16.40
  -2 -16   2  -18.80   20.20
   1  16  -2   58.59   23.90
   1  16  -2   54.99   29.50
  -1 -16   2   83.49   29.40
   0  16  -2   99.49   31.30
   0  16  -2  153.38   39.10
   0 -16   2  139.79   34.10
  -1  16  -2  -17.40   19.70
  -1  16  -2  -22.70   22.50
   1 -16   2    9.20   19.00
  -2  16  -2   13.30   26.70
  -2  16  -2   25.50   26.40
   2 -16   2   56.39   26.50
  -3  16  -2  -15.10   23.10
  -3  16  -2  -23.60   21.20
  -4  16  -2   65.19   33.60
  -4  16  -2   18.30   23.60
  -5  16  -2    6.10   29.10
  -6  16  -2   71.09   44.40
  -7  16  -2    1.20   36.00
  -8  16  -2   25.70   40.50
  -9  16  -2   10.10   38.30
  13  15  -2  -14.50   37.70
  12  15  -2    5.40   30.10
  12  15  -2  -37.00   28.50
  11  15  -2   10.10   34.30
  11  15  -2   34.10   33.50
  10  15  -2  -24.30   23.70
  10  15  -2   19.70   33.60
 -10 -15   2  -57.89   25.20
   9  15  -2   30.50   35.20
   9  15  -2   -0.70   26.10
  -9 -15   2   17.30   24.40
   8  15  -2   28.10   28.40
   8  15  -2   15.80   32.00
  -8 -15   2   29.80   27.80
   7  15  -2    7.50   22.30
   7  15  -2  -30.10   25.90
  -7 -15   2   -3.40   22.20
   6  15  -2   -7.30   22.30
  -6 -15   2   16.80   24.90
   5  15  -2    3.10   27.40
  -5 -15   2   36.80   25.60
   4  15  -2    2.50   24.70
  -4 -15   2   29.20   23.40
   3  15  -2   74.49   33.50
  -3 -15   2  110.99   34.10
   2  15  -2  162.58   30.00
   2  15  -2  202.58   43.40
  -2 -15   2  137.09   36.60
   1  15  -2   37.50   25.50
   1  15  -2   13.40   18.80
  -1 -15   2   -2.00   19.60
   0  15  -2   28.10   22.10
   0  15  -2   29.90   23.50
   0 -15   2   44.30   20.10
  -1  15  -2   -2.40   20.40
  -1  15  -2    5.90   21.50
   1 -15   2   11.40   17.20
  -2  15  -2   -7.10   20.50
  -2  15  -2  -21.10   21.00
   2 -15   2  -16.60   16.90
  -3  15  -2  -22.70   21.90
  -3  15  -2  -12.20   24.00
   3 -15   2   17.20   21.30
  -4  15  -2  -19.70   20.50
  -4  15  -2   -0.90   25.70
  -5  15  -2   13.00   32.80
  -6  15  -2  -13.40   29.10
  -7  15  -2  -46.40   27.40
  -8  15  -2   43.20   39.80
  -9  15  -2  -27.50   37.10
  13  14  -2  -40.80   33.10
  12  14  -2   26.90   38.20
  12  14  -2   16.50   40.00
  11  14  -2  -28.40   30.20
  11  14  -2  -37.70   21.60
  10  14  -2   -3.50   32.10
  10  14  -2   24.60   28.00
 -10 -14   2  -24.80   26.20
   9  14  -2    9.90   26.60
   9  14  -2    5.00   29.20
  -9 -14   2    0.90   23.60
   8  14  -2  -11.40   22.80
   8  14  -2  -35.60   21.80
  -8 -14   2   -0.60   23.80
   7  14  -2   66.99   30.30
   7  14  -2   49.90   33.60
  -7 -14   2   22.70   26.30
   6  14  -2  -16.00   16.60
  -6 -14   2   -2.40   20.90
   5  14  -2   -6.40   18.80
  -5 -14   2   23.00   21.80
   4  14  -2   50.99   27.10
  -4 -14   2  -46.30   16.00
   3  14  -2   33.60   14.80
   3  14  -2   46.40   25.00
  -3 -14   2   10.30   22.60
   2  14  -2   -8.00   20.90
   2  14  -2   -4.00   13.60
  -2 -14   2   -5.10   17.40
   1  14  -2  274.47   43.90
   1  14  -2  401.26   53.39
  -1 -14   2  398.46   50.49
   0  14  -2   16.50   20.80
   0  14  -2   21.10   20.60
   0 -14   2   26.40   18.80
  -1  14  -2   28.60   21.70
  -1  14  -2   44.50   25.00
   1 -14   2    2.60   20.00
  -2  14  -2  -26.10   16.40
  -2  14  -2   -9.10   18.90
   2 -14   2  -25.40   13.80
  -3  14  -2    9.80   19.10
  -3  14  -2    0.50   22.80
   3 -14   2   23.80   25.80
  -4  14  -2   24.20   26.80
  -4  14  -2   95.89   37.10
   4 -14   2   58.39   26.90
  -5  14  -2    7.60   24.40
  -6  14  -2   20.20   29.30
  -7  14  -2   13.00   30.60
  -8  14  -2   -8.30   33.70
  -9  14  -2   56.89   43.40
 -10  14  -2  -52.39   37.90
  14  13  -2   25.90   39.90
  13  13  -2   64.39   42.40
  12  13  -2  -26.10   46.60
  12  13  -2  -11.40   29.20
  11  13  -2   22.80   28.70
  11  13  -2  -17.30   28.30
  10  13  -2  -15.80   22.40
  10  13  -2   23.80   30.20
 -10 -13   2   -4.10   25.00
   9  13  -2   54.89   32.60
   9  13  -2   18.90   26.20
  -9 -13   2   57.69   32.60
   8  13  -2   18.30   27.00
   8  13  -2   70.99   34.20
  -8 -13   2   36.60   29.90
   7  13  -2   43.80   34.30
   7  13  -2   -3.20   22.50
  -7 -13   2   25.00   25.60
   6  13  -2  -11.90   16.10
  -6 -13   2    4.90   20.80
   5  13  -2   46.20   25.90
  -5 -13   2   28.10   24.30
   4  13  -2    3.00   19.40
  -4 -13   2   48.40   24.20
   3  13  -2   -0.20   11.40
   3  13  -2   -1.70   19.90
  -3 -13   2   12.30   17.50
   2  13  -2  141.99   25.10
   2  13  -2   62.19   27.40
  -2 -13   2  102.09   29.50
   1  13  -2  141.89   27.30
   1  13  -2   93.29   27.40
  -1 -13   2   40.30   22.40
   0  13  -2   26.10   19.70
   0  13  -2   74.49   24.90
   0 -13   2   38.30   22.10
  -1  13  -2   22.30   20.50
  -1  13  -2    0.90   19.50
   1 -13   2   24.10   17.10
  -2  13  -2   72.49   27.50
  -2  13  -2   63.69   30.60
   2 -13   2   96.59   25.80
  -3  13  -2   82.59   33.60
  -3  13  -2   47.30   22.40
   3 -13   2   87.59   27.70
  -4  13  -2    1.80   21.30
  -4  13  -2  -27.00   17.40
   4 -13   2   29.80   27.30
  -5  13  -2   24.60   20.80
  -5  13  -2   43.30   28.10
   5 -13   2  -10.70   21.30
  -6  13  -2  -32.40   23.90
  -7  13  -2   -1.30   25.40
  -8  13  -2    1.20   34.20
  -9  13  -2    0.60   38.20
 -10  13  -2    2.40   38.70
  14  12  -2  -40.80   33.30
  13  12  -2   25.90   37.50
  12  12  -2   -8.70   30.70
  11  12  -2   -1.10   25.30
  11  12  -2   32.70   34.70
  10  12  -2    3.50   27.30
  10  12  -2   69.19   33.10
   9  12  -2   -8.20   23.40
   9  12  -2  -10.70   22.80
  -9 -12   2   -4.40   24.10
   8  12  -2   15.20   21.00
   8  12  -2   27.00   27.30
  -8 -12   2    5.20   23.80
   7  12  -2  -33.00   18.00
   7  12  -2   10.30   24.80
  -7 -12   2   -6.40   19.10
   6  12  -2   10.00   19.90
  -6 -12   2   54.59   26.60
   5  12  -2   98.99   30.90
  -5 -12   2   73.49   29.10
   4  12  -2   -1.90   15.50
   4  12  -2    1.20    6.30
  -4 -12   2    4.50   18.30
   3  12  -2  131.29   20.80
   3  12  -2  100.09   28.40
  -3 -12   2  170.18   33.20
   2  12  -2   37.50   23.20
   2  12  -2   25.60   14.90
  -2 -12   2   34.60   19.60
   1  12  -2  411.26   49.20
   1  12  -2  389.66   52.89
  -1 -12   2  543.95   55.29
   0  12  -2  981.90   88.29
   0  12  -2  835.22   88.89
   0 -12   2  854.51   86.39
  -1  12  -2   32.40   19.90
  -1  12  -2   45.10   22.70
   1 -12   2   35.40   17.70
  -2  12  -2   12.90   16.90
  -2  12  -2   29.00   22.30
   2 -12   2   21.40   18.20
  -3  12  -2   12.80   17.00
  -3  12  -2   42.50   25.10
   3 -12   2    4.90   17.10
  -4  12  -2  207.88   35.80
  -4  12  -2  111.09   38.10
   4 -12   2  226.48   39.10
  -5  12  -2  -16.60   21.90
  -5  12  -2    2.00   15.40
   5 -12   2  -15.50   21.40
  -6  12  -2   -3.50   22.00
   6 -12   2    6.90   29.80
  -7  12  -2   31.70   33.70
  -8  12  -2  -32.80   29.70
  -9  12  -2   43.90   43.50
 -10  12  -2    6.40   37.40
 -11  12  -2  -41.10   33.10
  14  11  -2  -42.50   32.50
  13  11  -2   23.20   38.20
  12  11  -2  -10.20   30.10
  11  11  -2   14.50   28.60
  11  11  -2  -14.30   24.40
  10  11  -2   84.69   31.10
  10  11  -2   33.30   29.50
   9  11  -2   85.39   31.00
   9  11  -2   81.19   34.60
  -9 -11   2  106.29   38.00
   8  11  -2   57.59   30.70
   8  11  -2    5.50   22.30
  -8 -11   2  -46.40   14.80
   7  11  -2  157.68   40.80
   7  11  -2  115.39   33.80
  -7 -11   2  234.98   47.50
   6  11  -2  113.99   31.50
  -6 -11   2   53.59   26.80
   5  11  -2   44.30   22.20
  -5 -11   2   87.69   28.60
   4  11  -2  161.38   34.40
  -4 -11   2  100.59   29.90
   3  11  -2   11.60    9.60
   3  11  -2    2.90   15.80
  -3 -11   2    2.10   14.90
   2  11  -2   95.79   18.70
   2  11  -2   67.19   24.20
  -2 -11   2   80.29   24.20
   1  11  -2  198.88   30.00
   1  11  -2  170.38   34.70
  -1 -11   2  207.78   32.50
   0  11  -2  178.88   30.80
   0  11  -2   93.89   28.00
   0 -11   2  203.48   31.70
  -1  11  -2   12.20   16.30
  -1  11  -2   -8.20   14.30
   1 -11   2    5.80   13.50
  -2  11  -2  209.18   41.30
  -2  11  -2  293.17   40.80
   2 -11   2  291.37   39.50
  -3  11  -2  -16.10   17.60
  -3  11  -2  -11.40   13.60
   3 -11   2   12.50   18.00
  -4  11  -2    3.00   15.80
  -4  11  -2  -23.20   17.00
   4 -11   2   -4.30   14.80
  -5  11  -2  117.19   24.60
  -5  11  -2   25.60   28.30
   5 -11   2   99.29   32.00
  -6  11  -2  -35.90   20.30
   6 -11   2  -26.80   23.90
  -7  11  -2   38.80   34.20
   7 -11   2   34.70   31.50
  -8  11  -2  -25.20   26.00
  -9  11  -2   66.79   39.80
 -10  11  -2  -12.50   29.50
 -11  11  -2  -19.70   37.30
  14  10  -2   34.30   40.10
  13  10  -2    4.50   31.20
  12  10  -2   62.29   37.20
  11  10  -2  -19.30   21.30
  11  10  -2   14.30   26.90
  10  10  -2  174.28   48.00
  10  10  -2  193.68   43.80
   9  10  -2   79.19   34.20
   9  10  -2    9.40   22.00
  -9 -10   2   55.69   29.40
   8  10  -2   11.20   24.40
   8  10  -2   13.90   19.40
  -8 -10   2    7.50   21.00
   7  10  -2  127.99   32.30
   7  10  -2  150.38   41.90
  -7 -10   2  153.78   39.90
   6  10  -2   77.09   24.00
  -6 -10   2   40.40   22.80
   5  10  -2   72.69   23.80
  -5 -10   2   71.29   27.50
   4  10  -2   73.49   24.90
  -4 -10   2  120.79   29.70
   3  10  -2  493.85   56.79
   3  10  -2  470.45   43.80
  -3 -10   2  502.85   57.19
   2  10  -2  162.48   23.10
   2  10  -2  138.19   32.50
  -2 -10   2  177.28   32.70
   1  10  -2    9.50   12.10
   1  10  -2   19.00   16.10
  -1 -10   2   18.30   15.00
   0  10  -2  213.88   36.00
   0  10  -2  172.98   31.40
   0 -10   2  219.48   32.90
  -1  10  -2   52.79   19.40
  -1  10  -2   21.50   17.50
   1 -10   2   14.10   16.60
  -2  10  -2   69.79   21.10
  -2  10  -2   20.60   18.40
   2 -10   2   36.30   17.50
  -3  10  -2  143.09   33.90
  -3  10  -2   88.09   23.30
   3 -10   2   84.79   25.10
  -4  10  -2   -3.10   19.30
  -4  10  -2   49.60   17.80
   4 -10   2   56.89   26.50
  -5  10  -2  117.49   35.80
  -5  10  -2  167.18   27.80
   5 -10   2  146.79   38.40
  -6  10  -2   47.00   30.30
   6 -10   2   89.99   36.50
  -7  10  -2    2.90   24.00
   7 -10   2   26.60   27.80
  -8  10  -2   -3.80   30.30
   8 -10   2  -32.80   19.40
  -9  10  -2   18.10   31.10
 -10  10  -2   -2.00   39.10
 -11  10  -2   22.20   37.80
  14   9  -2  -10.30   36.30
  13   9  -2   -2.70   30.80
  12   9  -2   14.10   31.20
  11   9  -2   17.20   22.90
  11   9  -2    3.40   27.20
  10   9  -2   24.70   24.50
  10   9  -2   45.50   36.50
   9   9  -2   53.79   31.80
   9   9  -2   27.20   23.60
  -9  -9   2   27.40   26.10
   8   9  -2  125.89   31.30
   8   9  -2  109.39   36.00
  -8  -9   2   75.69   32.00
   7   9  -2  157.28   38.60
   7   9  -2  159.58   35.00
  -7  -9   2   88.79   31.10
   6   9  -2   27.10   18.40
   6   9  -2   57.89   26.90
  -6  -9   2   67.29   23.50
   5   9  -2  250.07   41.20
  -5  -9   2  262.87   42.80
   4   9  -2   26.30   16.30
  -4  -9   2   -4.00   15.40
   3   9  -2  145.99   16.90
   3   9  -2  112.09   25.70
  -3  -9   2  131.09   29.60
  -3  -9   2  125.39   17.80
   2   9  -2   15.80   10.50
   2   9  -2    9.50   17.20
  -2  -9   2   16.60   18.40
   1   9  -2  378.26   38.90
   1   9  -2  361.06   43.80
  -1  -9   2  272.57   43.70
   0   9  -2  291.07   38.50
   0   9  -2  378.46   43.40
   0  -9   2  302.27   46.10
  -1   9  -2  121.49   27.30
  -1   9  -2  135.19   26.60
   1  -9   2  143.89   27.90
  -2   9  -2  130.89   25.70
  -2   9  -2  111.79   27.30
   2  -9   2  144.99   30.20
  -3   9  -2  269.07   35.60
  -3   9  -2  285.97   41.60
   3  -9   2  254.27   41.90
  -4   9  -2   13.70   19.40
  -4   9  -2   27.00   15.50
   4  -9   2    2.80   19.80
  -5   9  -2  166.38   39.70
  -5   9  -2  155.18   25.70
   5  -9   2  144.59   37.00
  -6   9  -2  102.49   39.60
   6  -9   2  102.39   31.90
  -7   9  -2  -12.00   21.10
   7  -9   2    7.30   18.90
  -8   9  -2   -2.00   28.90
   8  -9   2  -17.90   18.10
  -9   9  -2  -29.90   23.40
   9  -9   2  -36.70   20.80
 -10   9  -2   55.29   40.10
 -11   9  -2   27.90   38.80
 -12   9  -2  -18.50   34.70
  14   8  -2  -34.50   29.30
  13   8  -2   21.50   34.90
  12   8  -2   -6.10   28.90
  11   8  -2  -11.60   23.00
  10   8  -2  259.87   46.60
  10   8  -2  251.57   52.89
   9   8  -2   39.10   26.80
   9   8  -2   21.30   17.50
   8   8  -2   41.40   21.70
   8   8  -2   53.39   29.20
  -8  -8   2   16.50   24.00
  -8  -8   2   43.90   15.30
   7   8  -2  103.89   26.60
   7   8  -2   71.49   28.70
   7   8  -2  100.79   16.60
  -7  -8   2   59.89   27.40
   6   8  -2  240.08   39.20
   6   8  -2  182.78   40.30
   6   8  -2  219.38   22.40
   6   8  -2  216.98   24.10
  -6  -8   2  176.18   38.30
   5   8  -2 1280.87  113.79
  -5  -8   2 1162.68  115.79
   4   8  -2  172.58   33.60
  -4  -8   2  247.48   35.60
   3   8  -2   15.40   16.90
   3   8  -2   15.30    7.20
  -3  -8   2   43.50   18.40
   2   8  -2  230.98   32.70
   2   8  -2  103.09   17.70
  -2  -8   2  106.49   24.40
   1   8  -2  265.07   31.90
   1   8  -2  298.27   38.50
  -1  -8   2  259.67   36.20
   0   8  -2  912.41   85.49
   0   8  -2  901.01   83.99
   0  -8   2  944.21   84.99
  -1   8  -2  149.99   28.40
  -1   8  -2  147.19   26.00
   1  -8   2  139.49   26.10
  -2   8  -2    3.50   14.50
  -2   8  -2  -22.10   10.80
   2  -8   2    1.70   18.30
  -3   8  -2  197.08   38.20
  -3   8  -2  181.78   27.90
   3  -8   2  177.78   39.90
  -4   8  -2   71.29   24.00
  -4   8  -2   79.89   18.50
   4  -8   2   55.89   24.90
  -5   8  -2    6.40   11.40
  -5   8  -2   15.90   21.70
   5  -8   2   19.30   20.10
  -6   8  -2  -13.00   23.80
  -6   8  -2   12.80   11.70
   6  -8   2   14.00   17.00
  -7   8  -2   40.40   27.00
   7  -8   2   17.10   21.30
  -8   8  -2   31.80   29.00
   8  -8   2  109.09   33.70
  -9   8  -2   48.10   31.00
   9  -8   2   -6.00   18.70
 -10   8  -2  -14.40   29.70
  10  -8   2    3.10   23.80
 -11   8  -2    7.90   33.90
 -12   8  -2   10.60   41.40
  14   7  -2   -9.00   31.30
  13   7  -2  -34.80   29.50
  12   7  -2   -6.40   28.20
  11   7  -2   22.50   28.20
  10   7  -2  120.09   29.20
  10   7  -2   53.79   33.50
   9   7  -2  110.89   37.50
   9   7  -2  206.98   38.10
  -9  -7   2  187.48   31.40
   8   7  -2  -12.30   18.60
   8   7  -2  -22.80   11.50
  -8  -7   2   -6.20   11.20
  -8  -7   2  -19.60   19.70
   7   7  -2  448.26   58.59
   7   7  -2  399.96   40.90
   7   7  -2  435.56   50.09
  -7  -7   2  377.86   40.50
  -7  -7   2  367.36   55.39
   6   7  -2  129.49   27.40
   6   7  -2  130.29   33.30
   6   7  -2  133.19   18.30
  -6  -7   2   98.89   28.40
   5   7  -2   96.39   13.60
   5   7  -2   89.09   22.70
   5   7  -2   99.59   13.90
  -5  -7   2   64.69   23.60
   4   7  -2  187.48   32.60
   4   7  -2  122.99   13.70
   4   7  -2  139.79   14.40
  -4  -7   2  191.18   33.60
   3   7  -2  288.37   38.80
   3   7  -2  327.07   28.50
  -3  -7   2  271.87   40.00
  -3  -7   2  319.57   28.40
   2   7  -2  940.01   81.59
   2   7  -2  954.80   89.79
  -2  -7   2 1034.60   90.19
   1   7  -2   82.99   17.30
   1   7  -2   74.69   19.40
  -1  -7   2   95.79   20.70
   0   7  -2   27.40   16.00
   0   7  -2   52.29   16.30
   0  -7   2   29.50   14.80
  -1   7  -2   12.80   15.00
  -1   7  -2  -31.30    9.20
   1  -7   2    3.40   12.30
  -2   7  -2  730.63   71.59
  -2   7  -2  654.93   64.99
   2  -7   2  738.63   70.69
  -3   7  -2   40.40   14.30
  -3   7  -2   24.80   16.80
   3  -7   2   -0.30   17.80
  -4   7  -2  169.48   24.60
  -4   7  -2  223.88   39.30
   4  -7   2  185.88   33.60
  -5   7  -2   88.09   16.90
  -5   7  -2   90.89   31.10
   5  -7   2   77.39   23.60
  -6   7  -2  384.86   61.29
  -6   7  -2  310.97   34.10
   6  -7   2  333.87   45.90
  -7   7  -2   92.69   37.00
   7  -7   2   29.60   20.10
  -8   7  -2   42.30   32.40
   8  -7   2    3.00   17.50
  -9   7  -2   65.29   36.50
   9  -7   2   -6.60   19.50
 -10   7  -2   -9.30   26.00
  10  -7   2  -23.50   18.70
 -11   7  -2   54.69   39.20
  11  -7   2   15.80   28.40
 -12   7  -2   77.19   47.10
  14   6  -2    0.30   33.40
  13   6  -2    3.00   33.90
  12   6  -2   54.09   36.30
  11   6  -2   46.50   30.40
  10   6  -2    2.00   16.20
  10   6  -2  -15.70   20.50
 -10  -6   2   50.69   23.40
   9   6  -2   10.60   15.30
   9   6  -2  -18.70   19.20
  -9  -6   2  -25.40   12.80
   8   6  -2   -6.20   13.00
   8   6  -2    3.30   18.50
  -8  -6   2    1.70   12.60
   7   6  -2  722.13   73.19
   7   6  -2  671.73   80.99
  -7  -6   2  728.13   81.89
  -7  -6   2  772.32   68.69
   6   6  -2  171.68   20.90
   6   6  -2  152.08   34.10
   6   6  -2  192.88   32.20
  -6  -6   2  113.69   30.10
  -6  -6   2  116.29   20.80
   5   6  -2  312.17   44.30
   5   6  -2  234.68   36.00
   5   6  -2  287.47   28.60
  -5  -6   2  252.07   27.60
  -5  -6   2  312.97   42.70
   4   6  -2  386.26   34.60
   4   6  -2  376.96   34.60
   4   6  -2  496.15   47.40
  -4  -6   2  331.77   46.40
   3   6  -2  398.26   43.00
   3   6  -2  370.86   32.80
   3   6  -2  366.36   33.10
  -3  -6   2  383.76   33.10
  -3  -6   2  403.66   44.30
   2   6  -2  716.63   58.89
   2   6  -2  722.13   67.29
  -2  -6   2  683.73   66.89
  -2  -6   2  651.63   58.49
   1   6  -2    6.50   13.30
   1   6  -2    4.60   10.10
  -1  -6   2   13.10   12.80
   0   6  -2  186.68   28.30
   0   6  -2  173.08   27.30
   0  -6   2  208.58   27.90
  -1   6  -2  394.56   45.80
  -1   6  -2  460.35   48.90
   1  -6   2  522.35   48.70
  -2   6  -2  110.79   23.90
  -2   6  -2   98.79   18.90
   2  -6   2   73.89   22.90
  -3   6  -2  150.48   24.80
  -3   6  -2   92.19   28.10
   3  -6   2  163.08   29.60
  -4   6  -2   15.60   11.70
  -4   6  -2   20.60   19.40
   4  -6   2    7.10   13.90
  -5   6  -2   24.10    9.90
  -5   6  -2   13.10   17.50
   5  -6   2   -7.80   11.70
  -6   6  -2   10.70    8.50
  -6   6  -2   37.00   23.40
   6  -6   2   14.50   17.50
  -7   6  -2  187.58   44.40
   7  -6   2  148.29   32.60
  -8   6  -2   34.10   28.90
   8  -6   2   12.20   23.00
  -9   6  -2  -20.60   21.40
   9  -6   2    3.30   19.90
 -10   6  -2    4.80   26.40
  10  -6   2    5.20   21.10
 -11   6  -2   88.59   44.20
  11  -6   2   56.79   32.50
 -12   6  -2   -8.30   31.60
 -13   6  -2  -11.90   29.20
  14   5  -2  -12.30   35.70
  13   5  -2   11.20   30.90
  12   5  -2   54.29   36.20
  11   5  -2  -11.80   21.70
  10   5  -2  -25.70   14.10
  10   5  -2   18.50   24.40
 -10  -5   2    2.00   17.30
   9   5  -2    4.80   21.80
   9   5  -2   18.10   16.60
  -9  -5   2   -5.00   15.40
   8   5  -2  315.07   49.50
   8   5  -2  262.07   37.80
  -8  -5   2  262.17   36.60
   7   5  -2    4.10   18.20
   7   5  -2    5.30   13.20
  -7  -5   2  -12.10   20.80
  -7  -5   2    9.90   12.30
   6   5  -2   -7.00   17.50
   6   5  -2   26.10   14.10
  -6  -5   2  -27.20   12.00
  -6  -5   2   25.90   12.00
   5   5  -2  167.68   29.70
   5   5  -2  261.27   39.00
  -5  -5   2  179.28   22.90
  -5  -5   2  168.98   32.20
   4   5  -2  677.43   65.79
   4   5  -2  652.43   57.59
  -4  -5   2  744.03   69.69
  -4  -5   2  651.03   57.69
   3   5  -2   -0.60    5.80
   3   5  -2   19.60    7.30
   3   5  -2   -9.50   12.00
  -3  -5   2    7.10   13.50
   2   5  -2   39.90    8.70
   2   5  -2   -3.30   14.10
  -2  -5   2   18.80   14.50
  -2  -5   2   49.40    9.70
   1   5  -2  102.49   19.90
   1   5  -2  122.19   17.40
  -1  -5   2  109.99   21.20
   0   5  -2   82.09   18.10
   0   5  -2  105.09   19.30
   0  -5   2  115.59   20.30
  -1   5  -2  349.87   38.30
  -1   5  -2  376.26   37.50
   1  -5   2  306.47   37.80
  -2   5  -2  481.15   44.60
  -2   5  -2  458.85   51.49
   2  -5   2  452.55   51.49
  -3   5  -2  190.88   32.90
  -3   5  -2  170.38   22.50
   3  -5   2  188.18   29.80
  -4   5  -2   24.10   19.70
  -4   5  -2    2.80    8.20
   4  -5   2   65.89   25.10
  -5   5  -2  267.17   39.90
  -5   5  -2  251.97   25.70
   5  -5   2  226.58   36.10
  -6   5  -2   18.30   20.10
   6  -5   2   29.90   18.90
  -7   5  -2   91.49   31.50
   7  -5   2  136.19   30.20
  -8   5  -2  243.08   53.49
   8  -5   2  195.68   40.70
  -9   5  -2   63.39   29.40
   9  -5   2   60.59   27.30
 -10   5  -2  -39.40   22.40
  10  -5   2   -2.20   21.50
 -11   5  -2   57.19   38.30
  11  -5   2    1.40   22.80
 -12   5  -2   27.50   34.60
  12  -5   2    2.80   27.00
 -13   5  -2  -49.90   25.90
  14   4  -2   37.80   39.60
  13   4  -2   10.00   29.00
  12   4  -2   12.60   27.90
  11   4  -2   25.90   28.40
 -11  -4   2    5.70   20.00
  10   4  -2    9.40   22.90
 -10  -4   2    8.60   18.80
   9   4  -2   -9.30   13.90
   9   4  -2    9.50   21.60
  -9  -4   2   -7.30   17.10
   8   4  -2   24.40   22.60
   8   4  -2  111.69   24.30
  -8  -4   2   76.19   22.80
   7   4  -2   50.29   17.60
   7   4  -2   15.60   18.70
  -7  -4   2   -6.20   13.30
   6   4  -2  401.96   48.10
   6   4  -2  448.46   56.19
  -6  -4   2  447.16   56.29
  -6  -4   2  527.65   48.40
   5   4  -2    6.70   11.20
   5   4  -2   -3.70   15.30
  -5  -4   2   -6.80    8.90
  -5  -4   2  -12.70   10.80
   4   4  -2 1466.55  123.99
  -4  -4   2 1387.36  126.29
  -4  -4   2 1433.66  119.09
   3   4  -2   49.10   16.20
   3   4  -2   42.70   10.50
   3   4  -2   28.30    8.50
  -3  -4   2   57.69   17.00
   2   4  -2 1169.98   97.79
   2   4  -2 1169.08  103.89
  -2  -4   2 1244.48  105.09
  -2  -4   2 1218.88   97.89
   1   4  -2   69.29   12.00
   1   4  -2   39.30   14.20
  -1  -4   2   67.59   12.00
  -1  -4   2   49.60   15.40
   0   4  -2   34.80   13.50
   0   4  -2   21.30   11.90
   0  -4   2    4.70   11.30
  -1   4  -2  139.59   25.90
  -1   4  -2  216.08   24.30
   1  -4   2  171.98   26.60
  -2   4  -2  265.37   30.20
  -2   4  -2  166.58   21.40
   2  -4   2  144.69   25.20
  -3   4  -2  509.65   53.79
  -3   4  -2  509.85   44.70
   3  -4   2  471.75   50.39
  -4   4  -2  465.75   45.40
  -4   4  -2  476.25   56.39
   4  -4   2  562.44   45.30
   4  -4   2  533.35   54.69
  -5   4  -2   10.70   19.60
   5  -4   2   26.70    7.70
   5  -4   2   25.90   14.80
  -6   4  -2   76.99   25.90
   6  -4   2   77.39   23.50
  -7   4  -2  356.56   53.49
   7  -4   2  432.06   53.69
  -8   4  -2   57.89   31.20
   8  -4   2   15.80   22.80
  -9   4  -2    2.10   21.40
   9  -4   2    7.40   21.20
 -10   4  -2   13.60   27.90
  10  -4   2   -3.70   20.10
 -11   4  -2   17.30   30.90
  11  -4   2   29.10   28.60
 -12   4  -2   25.50   35.50
  12  -4   2   78.09   34.90
 -13   4  -2   31.50   37.50
  13  -4   2  -15.20   29.30
  14   3  -2  -10.60   35.60
  13   3  -2   17.40   29.90
  12   3  -2    7.40   27.30
 -12  -3   2    0.60   22.70
  11   3  -2  239.88   53.99
 -11  -3   2  202.38   44.80
  10   3  -2   -3.20   20.40
 -10  -3   2   -2.40   20.50
   9   3  -2  121.09   26.10
   9   3  -2  101.49   31.30
  -9  -3   2   60.79   24.70
   8   3  -2  112.69   33.10
   8   3  -2   85.89   22.00
  -8  -3   2   94.29   26.20
   7   3  -2  569.44   55.69
   7   3  -2  463.15   61.89
  -7  -3   2  539.65   56.89
   6   3  -2   85.09   19.90
   6   3  -2   93.09   25.80
  -6  -3   2   93.39   22.10
   5   3  -2  357.26   46.00
   5   3  -2  302.57   38.30
  -5  -3   2  371.46   39.20
  -5  -3   2  407.06   46.50
   4   3  -2    1.10    9.90
   4   3  -2    5.80   16.10
  -4  -3   2  -27.50   12.30
  -4  -3   2   -9.70    9.40
   3   3  -2   26.90   12.30
  -3  -3   2  -18.00   11.60
  -3  -3   2  -10.30    8.30
   2   3  -2   33.60    8.80
   2   3  -2   44.80   14.60
   2   3  -2   42.90    8.40
  -2  -3   2   29.20    8.50
  -2  -3   2   51.79   15.60
   1   3  -2  349.87   32.40
   1   3  -2  357.86   36.10
  -1  -3   2  388.96   37.00
  -1  -3   2  356.36   32.70
   0   3  -2  455.65   38.10
   0   3  -2  375.36   38.00
   0  -3   2  361.16   38.30
  -1   3  -2  808.12   77.99
  -1   3  -2  947.21   75.69
   1  -3   2  917.61   80.59
  -2   3  -2    8.10    7.40
  -2   3  -2   36.90   17.20
   2  -3   2    4.10   10.50
   2  -3   2    3.80    6.90
  -3   3  -2  374.86   43.20
  -3   3  -2  336.77   31.50
   3  -3   2  352.26   31.50
   3  -3   2  368.16   39.40
  -4   3  -2  229.68   20.80
  -4   3  -2  213.98   33.70
   4  -3   2  221.18   31.70
   4  -3   2  210.98   20.70
  -5   3  -2  309.87   44.40
   5  -3   2  354.06   43.80
  -6   3  -2   42.10   24.40
   6  -3   2   48.80   20.10
  -7   3  -2   24.20   21.20
   7  -3   2   43.20   19.60
  -8   3  -2   39.20   27.70
   8  -3   2   13.50   20.20
  -9   3  -2    5.70   24.50
   9  -3   2   44.20   25.80
 -10   3  -2   62.19   35.20
  10  -3   2   32.10   25.50
 -11   3  -2   61.39   37.70
  11  -3   2   45.00   32.10
 -12   3  -2   11.80   31.90
  12  -3   2  -16.80   27.00
 -13   3  -2  -64.79   23.90
  13  -3   2  -12.80   25.50
  14   2  -2  -30.60   23.70
  13   2  -2   39.30   31.60
  12   2  -2  -23.90   23.80
 -12  -2   2   -4.20   24.00
  11   2  -2   14.20   26.00
 -11  -2   2   33.80   25.60
  10   2  -2   37.10   26.60
 -10  -2   2   36.60   22.90
   9   2  -2   37.20   24.30
   9   2  -2  -13.50   14.30
  -9  -2   2   -4.60   16.70
   8   2  -2   -1.90   13.10
   8   2  -2   26.20   20.00
  -8  -2   2   60.69   23.60
   7   2  -2   -6.30   13.30
   7   2  -2   10.40   13.40
  -7  -2   2   -1.30   14.50
   6   2  -2  461.75   46.80
   6   2  -2  468.75   53.89
  -6  -2   2  400.36   47.80
   5   2  -2  188.38   26.50
   5   2  -2  237.78   33.80
  -5  -2   2  154.68   26.90
  -5  -2   2  204.88   34.70
   4   2  -2  104.69   17.50
   4   2  -2   30.20   16.60
  -4  -2   2   63.19   15.70
  -4  -2   2   71.09   18.40
   3   2  -2   28.40   11.90
  -3  -2   2   40.20   12.40
  -3  -2   2   21.00   15.10
   2   2  -2 2318.47  187.28
   2   2  -2 2227.38  189.48
   2   2  -2 2370.86  187.58
  -2  -2   2 2359.16  187.38
  -2  -2   2 2301.37  190.58
   1   2  -2  142.69   15.40
   1   2  -2  191.68   19.80
  -1  -2   2  161.78   19.10
  -1  -2   2  118.59   15.90
   0   2  -2 1603.24  131.89
   0   2  -2 1609.44  131.89
   0  -2   2 1657.33  132.09
   0  -2   2 1597.14  131.79
   0  -2   2 1619.64  132.79
  -1   2  -2  323.07   31.30
  -1   2  -2  270.47   27.40
   1  -2   2  283.67   30.90
   1  -2   2  321.47   27.80
  -2   2  -2 1286.27  112.19
  -2   2  -2 1321.57  106.19
   2  -2   2 1359.76  106.39
   2  -2   2 1253.97  111.39
  -3   2  -2  649.93   60.19
   3  -2   2  552.34   57.29
  -4   2  -2  576.94   61.19
   4  -2   2  608.04   60.39
  -5   2  -2  151.08   30.00
   5  -2   2  182.78   33.00
  -6   2  -2  292.17   39.10
   6  -2   2  199.58   36.70
  -7   2  -2  189.38   37.20
   7  -2   2  123.19   30.80
  -8   2  -2  165.98   38.80
   8  -2   2  134.89   35.40
  -9   2  -2   25.80   25.00
   9  -2   2   -6.50   18.90
 -10   2  -2  -19.30   17.80
  10  -2   2    7.90   24.30
 -11   2  -2  -37.30   22.40
  11  -2   2  109.09   38.60
 -12   2  -2   -6.30   26.80
  12  -2   2   51.49   33.10
 -13   2  -2   44.40   38.20
  13  -2   2   85.59   41.30
 -14   2  -2   -7.00   31.50
  14  -2   2  -28.80   28.10
  14   1  -2   10.40   35.80
  13   1  -2   23.10   32.60
 -13  -1   2   50.29   36.80
  12   1  -2  -23.90   23.70
 -12  -1   2  -26.40   23.50
  11   1  -2  166.48   47.20
 -11  -1   2  101.89   35.60
  10   1  -2   57.19   28.90
 -10  -1   2    1.80   21.00
   9   1  -2   30.70   24.20
   9   1  -2   45.20   28.30
  -9  -1   2   27.10   23.00
   8   1  -2   -4.80   11.90
   8   1  -2   16.90   19.90
  -8  -1   2   -6.90   16.80
   7   1  -2  129.59   23.20
   7   1  -2   70.39   23.60
  -7  -1   2   62.39   22.80
   6   1  -2  146.49   23.40
   6   1  -2  151.68   29.70
  -6  -1   2  121.69   26.20
   5   1  -2  304.97   34.00
   5   1  -2  285.57   39.40
  -5  -1   2  322.67   37.60
   4   1  -2   22.40   10.80
   4   1  -2   -6.50   10.20
  -4  -1   2   21.40   13.30
  -4  -1   2    9.10   13.80
   3   1  -2  149.99   25.50
   3   1  -2  207.68   23.20
  -3  -1   2  174.78   27.10
  -3  -1   2  222.18   25.40
   2   1  -2  211.88   24.00
  -2  -1   2  210.88   26.00
  -2  -1   2  219.18   24.70
   1   1  -2  876.31   73.99
   1   1  -2  900.81   75.39
   1   1  -2  965.90   74.19
   1   1  -2  845.92   74.89
  -1  -1   2  860.71   75.29
  -1  -1   2  929.81   74.19
   0   1  -2 6991.30  552.94
   0   1  -2 6985.80  552.74
   0  -1   2 7132.99  553.04
   0  -1   2 6665.53  553.34
  -1   1  -2 1931.21  154.48
  -1   1  -2 1950.01  151.28
   1  -1   2 1769.32  153.98
  -2   1  -2    2.60   10.90
   2  -1   2  -11.60    9.00
  -3   1  -2   76.19   18.40
   3  -1   2   90.39   19.90
  -4   1  -2  759.82   73.09
   4  -1   2  779.42   73.69
  -5   1  -2  363.46   46.10
   5  -1   2  393.16   46.40
  -6   1  -2  240.08   38.20
   6  -1   2  259.77   39.50
  -7   1  -2  254.07   47.60
   7  -1   2  426.46   50.89
  -8   1  -2    1.30   18.10
   8  -1   2   13.90   20.80
  -9   1  -2  104.09   34.00
   9  -1   2   82.99   33.10
 -10   1  -2   31.10   26.80
  10  -1   2   -5.30   20.50
 -11   1  -2    4.40   23.80
  11  -1   2    1.70   24.30
 -12   1  -2  -33.60   23.20
  12  -1   2    0.40   27.70
 -13   1  -2    6.20   32.00
  13  -1   2    8.00   30.70
 -14   1  -2  -43.90   33.10
  14  -1   2  -19.20   33.20
  14   0  -2   40.00   38.20
  13   0  -2   15.50   30.00
 -13   0   2   26.40   33.20
  12   0  -2  -15.00   25.00
 -12   0   2   10.80   27.60
  11   0  -2   -3.10   20.50
 -11   0   2   30.70   28.40
  10   0  -2  103.59   36.00
 -10   0   2  137.89   38.20
   9   0  -2   15.70   21.10
  -9   0   2   33.90   23.20
   8   0  -2  105.69   20.80
   8   0  -2   64.09   27.20
  -8   0   2   80.59   28.40
   7   0  -2   14.10   11.20
   7   0  -2   27.60   17.80
  -7   0   2   21.40   17.20
   6   0  -2  -14.60    8.10
   6   0  -2   10.10   13.40
  -6   0   2   -7.40   14.50
   5   0  -2   17.80   13.80
   5   0  -2   40.60   13.00
  -5   0   2   35.10   17.20
   4   0  -2  136.09   24.20
  -4   0   2  128.59   25.00
   3   0  -2 1311.47  128.29
  -3   0   2 1568.54  129.59
  -3   0   2 1741.33  130.09
   2   0  -2   89.99   17.20
  -2   0   2  136.59   19.70
  -2   0   2  152.98   20.40
   1   0  -2   10.00    5.20
   1   0  -2    3.60    6.30
  -1   0   2    9.50    6.00
  -1   0   2    1.20    6.70
   0   0  -2  257.27   23.70
   0   0  -2  217.98   23.10
   0   0   2  288.97   23.70
  -1   0  -2  292.97   25.80
  -1   0  -2  269.97   22.40
   1   0   2  257.17   22.40
   1   0   2  256.97   24.90
   1   0   2  213.98   24.90
  -2   0  -2   63.89    8.00
  -2   0  -2   78.09   16.40
   2   0   2   81.39    8.10
   2   0   2   73.29   15.70
  -3   0  -2  -10.50   11.90
   3   0   2   -0.50   12.80
   3   0   2   -6.20    3.40
  -4   0  -2  223.88   31.20
   4   0   2  210.58   32.20
   4   0   2  211.18   19.70
  -5   0  -2  486.75   49.70
   5   0   2  431.86   51.69
   5   0   2  440.26   38.60
  -6   0  -2  161.88   33.20
   6   0   2  226.38   20.10
   6   0   2  176.28   19.90
   6   0   2  208.48   36.50
  -7   0  -2   28.50   19.00
   7   0   2    4.10   17.90
   7   0   2    1.40    9.70
   7   0   2    0.50    6.20
  -8   0  -2   37.40   21.50
   8   0   2   38.50   25.00
  -9   0  -2   32.00   26.60
   9   0   2   12.50   24.20
 -10   0  -2   -3.30   23.60
  10   0   2   31.70   28.50
 -11   0  -2   79.59   34.40
  11   0   2  130.89   41.60
 -12   0  -2    8.60   27.50
  12   0   2   60.79   37.70
 -13   0  -2   45.30   35.50
  13   0   2   49.40   37.80
 -14   0  -2  -26.00   28.60
  14   0   2   -4.00   38.20
 -14   1   2   12.00   33.80
  13  -1  -2   10.10   30.10
 -13   1   2   24.30   33.10
  12  -1  -2   63.49   35.90
 -12   1   2  100.69   39.20
  11  -1  -2   -3.20   21.20
 -11   1   2   -0.70   23.90
  10  -1  -2  -11.90   22.60
 -10   1   2  -15.40   18.80
   9  -1  -2    1.40   21.10
  -9   1   2   19.80   23.40
   8  -1  -2  101.99   21.60
   8  -1  -2   95.79   29.20
  -8   1   2  146.89   35.10
   7  -1  -2  637.84   62.49
   7  -1  -2  703.73   72.49
  -7   1   2  677.33   72.79
   6  -1  -2   55.29   19.00
   6  -1  -2   81.59   17.00
  -6   1   2   60.29   24.20
   5  -1  -2   96.49   21.50
  -5   1   2   67.59   23.00
   4  -1  -2   53.39   15.20
  -4   1   2   31.70   15.10
  -3   1   2  209.18   28.10
   2  -1  -2  132.99   19.10
  -2   1   2  151.48   21.70
   1  -1  -2 2775.32  227.18
   1  -1  -2 2824.82  228.28
  -1   1   2 2970.80  229.78
  -1   1   2 2813.82  228.38
  -1   1   2 2841.22  227.28
   0  -1  -2 4876.91  381.56
   0  -1  -2 4732.33  382.76
   0  -1  -2 4857.51  382.86
   0   1   2 4869.31  382.76
   0   1   2 4835.82  381.56
   0   1   2 4590.94  382.76
  -1  -1  -2  512.75   40.20
  -1  -1  -2  516.85   40.80
  -1  -1  -2  384.26   41.00
   1   1   2  483.05   40.10
   1   1   2  509.45   40.70
   1   1   2  403.66   41.30
  -2  -1  -2   93.59   16.80
  -2  -1  -2  124.29   14.50
   2   1   2  140.39   14.80
   2   1   2  196.38   22.80
  -3  -1  -2  476.45   40.80
  -3  -1  -2  508.85   45.50
   3   1   2  459.45   40.20
   3   1   2  432.26   47.10
  -4  -1  -2  638.64   55.39
  -4  -1  -2  645.44   61.99
   4   1   2  675.83   65.29
   4   1   2  661.63   55.59
  -5  -1  -2  228.58   32.00
   5   1   2  239.38   35.60
   5   1   2  223.58   23.40
  -6  -1  -2 1523.95  132.19
   6   1   2 1491.75  135.79
   6   1   2 1473.85  122.79
  -7  -1  -2   37.50   21.00
   7   1   2   46.70   23.40
   7   1   2   48.60   11.30
  -8  -1  -2   -3.80   16.00
   8   1   2   11.70   20.40
   8   1   2    0.40    8.60
  -9  -1  -2   40.30   23.10
   9   1   2   32.90   27.70
 -10  -1  -2   60.59   29.40
  10   1   2   58.59   30.00
 -11  -1  -2   71.29   35.20
  11   1   2   53.29   34.20
 -12  -1  -2  208.18   53.49
  12   1   2  308.87   64.79
 -13  -1  -2   18.50   29.50
  13   1   2   -9.70   27.40
  14   1   2    1.10   31.70
 -14   2   2    8.70   35.50
  13  -2  -2   -3.10   29.50
 -13   2   2    5.20   32.00
  12  -2  -2   30.30   28.00
 -12   2   2   49.99   33.10
  11  -2  -2   22.80   26.40
 -11   2   2   13.20   28.10
  10  -2  -2    2.80   19.90
 -10   2   2   25.60   26.30
   9  -2  -2  -16.90   18.10
  -9   2   2   51.29   25.80
   8  -2  -2  -12.60   16.10
   8  -2  -2  -20.70   10.10
  -8   2   2  -28.00   13.20
   7  -2  -2   81.09   25.10
   7  -2  -2  114.99   20.40
  -7   2   2  126.39   30.50
   6  -2  -2 1043.90   99.09
  -6   2   2 1080.39  102.39
   5  -2  -2   -7.00   10.90
  -5   2   2   12.80   15.30
   4  -2  -2   16.80   12.50
  -4   2   2    9.20   14.40
   3  -2  -2 2568.24  200.58
  -3   2   2 2284.47  202.78
  -3   2   2 2432.96  198.68
   2  -2  -2 2435.66  210.78
   2  -2  -2 2593.44  213.08
  -2   2   2 2709.33  212.88
  -2   2   2 2740.93  214.68
  -2   2   2 2610.34  211.38
   1  -2  -2   28.60    6.60
   1  -2  -2   44.40    7.20
  -1   2   2   24.10   10.10
  -1   2   2   50.49    8.20
  -1   2   2   37.80   12.10
   0  -2  -2  343.97   30.80
   0  -2  -2  431.66   35.00
   0   2   2  379.56   30.80
  -1  -2  -2  280.17   26.40
  -1  -2  -2  253.87   24.60
  -1  -2  -2  256.47   26.30
   1   2   2  284.37   26.20
   1   2   2  257.87   24.40
   1   2   2  245.38   26.20
  -2  -2  -2  405.76   37.50
  -2  -2  -2  407.06   37.40
   2   2   2  413.76   37.60
   2   2   2  441.46   41.50
   2   2   2  414.96   37.20
  -3  -2  -2    1.00    9.20
   3   2   2  -22.00   10.80
   3   2   2    7.40    7.10
  -4  -2  -2 1027.70   88.29
   4   2   2 1045.70   92.89
   4   2   2  972.60   84.69
  -5  -2  -2   92.19   20.20
   5   2   2   74.39   13.70
   5   2   2   71.69   24.70
  -6  -2  -2   80.19   21.60
   6   2   2   93.49   16.00
   6   2   2  165.38   31.90
  -7  -2  -2  134.79   27.20
   7   2   2  105.59   18.30
   7   2   2   84.39   28.00
  -8  -2  -2  110.79   29.10
   8   2   2  103.69   18.70
   8   2   2  117.69   33.10
  -9  -2  -2    2.50   17.60
   9   2   2  -19.40   17.60
 -10  -2  -2   61.19   26.50
  10   2   2  120.29   38.90
 -11  -2  -2   13.00   25.10
  11   2   2    7.90   26.90
 -12  -2  -2   18.90   30.50
  12   2   2   33.80   31.70
 -13  -2  -2    8.40   27.90
  13   2   2   21.60   34.10
  14   2   2  -39.20   25.10
 -13   3   2   -4.60   31.90
  12  -3  -2  -14.90   25.60
 -12   3   2    5.50   31.60
  11  -3  -2  -12.20   22.90
 -11   3   2  -14.60   21.80
  10  -3  -2    5.80   19.90
 -10   3   2  -20.20   20.20
   9  -3  -2   53.59   26.30
  -9   3   2   31.60   25.40
   8  -3  -2   13.10   17.80
  -8   3   2   46.40   24.50
   7  -3  -2   96.49   26.50
  -7   3   2  159.88   34.00
   6  -3  -2    4.00   14.00
  -6   3   2   -2.80   19.30
   5  -3  -2    7.00   12.50
  -5   3   2  -25.70   13.30
   4  -3  -2  -18.40    8.40
  -4   3   2    6.30   10.10
  -4   3   2   -5.10   14.00
   3  -3  -2   45.20   13.30
  -3   3   2   44.60   12.60
  -3   3   2   67.39   19.80
   2  -3  -2   40.60   10.70
  -2   3   2   66.69   17.60
  -2   3   2   29.50   11.40
  -2   3   2   18.30    9.30
   1  -3  -2 2649.33  206.98
  -1   3   2 2684.53  207.08
  -1   3   2 2404.06  211.38
  -1   3   2 2544.25  210.28
   0  -3  -2   55.09    7.70
   0   3   2   40.90    6.70
   0   3   2   57.19   12.70
   0   3   2   91.59   14.10
  -1  -3  -2  271.47   30.20
  -1  -3  -2  302.47   28.50
  -1  -3  -2  377.66   28.90
   1   3   2  317.67   28.60
   1   3   2  331.87   31.80
   1   3   2  293.87   30.10
  -2  -3  -2  311.27   29.00
   2   3   2  303.37   29.00
   2   3   2  391.46   35.50
   2   3   2  299.27   32.10
  -3  -3  -2  463.05   43.30
   3   3   2  519.15   50.49
   3   3   2  478.45   44.60
  -4  -3  -2  502.95   46.80
   4   3   2  517.15   46.10
   4   3   2  440.66   51.29
  -5  -3  -2 1019.00   87.09
   5   3   2  919.21   83.99
   5   3   2 1008.20   93.29
  -6  -3  -2   71.89   20.20
   6   3   2  122.29   29.10
   6   3   2  147.89   20.70
  -7  -3  -2  198.78   32.70
   7   3   2  174.88   24.60
   7   3   2  232.98   43.20
  -8  -3  -2   11.10   16.40
   8   3   2   18.40   22.30
   8   3   2   -9.40    9.00
  -9  -3  -2   10.20   18.80
   9   3   2   -0.10   20.20
 -10  -3  -2  175.88   36.00
  10   3   2   30.90   30.90
 -11  -3  -2    6.60   22.20
  11   3   2   11.00   27.80
 -12  -3  -2   46.80   29.00
  12   3   2    6.00   33.10
  13   3   2   13.90   34.60
  14   3   2    8.50   34.80
 -13   4   2  -21.00   32.60
 -12   4   2   47.70   34.00
  11  -4  -2   -6.70   20.80
 -11   4   2   10.50   31.30
  10  -4  -2    5.30   21.70
 -10   4   2   23.10   27.90
   9  -4  -2   -6.30   17.10
  -9   4   2   -5.70   20.60
   8  -4  -2   36.60   19.90
  -8   4   2   45.10   27.50
   7  -4  -2    5.50   17.60
  -7   4   2   60.69   28.50
   6  -4  -2 1322.67  117.39
  -6   4   2 1233.28  121.59
   5  -4  -2   -6.70   10.60
  -5   4   2   38.60   19.50
   4  -4  -2   89.89   18.50
  -4   4   2   55.49   21.60
  -4   4   2   83.09   17.10
   3  -4  -2   67.39   15.10
  -3   4   2   63.99   20.10
  -3   4   2  110.89   17.40
   2  -4  -2  843.12   74.39
  -2   4   2  927.71   77.69
  -2   4   2  913.41   81.69
   1  -4  -2   74.69   11.30
  -1   4   2   75.39   15.90
  -1   4   2   40.70    9.00
  -1   4   2   94.29   19.70
   0  -4  -2   38.50    8.60
   0   4   2   26.50   12.20
   0   4   2   43.10    8.00
   0   4   2   29.80   13.80
  -1  -4  -2   12.60    7.90
  -1  -4  -2    0.00    7.30
  -1  -4  -2   -5.20    8.30
   1   4   2   -1.30    7.60
   1   4   2  -10.00   11.30
   1   4   2    0.90   10.00
  -2  -4  -2 2631.04  199.38
  -2  -4  -2 2475.55  203.98
   2   4   2 2472.25  199.08
   2   4   2 2320.27  204.18
   2   4   2 2468.45  203.28
  -3  -4  -2  306.57   26.90
   3   4   2  274.87   26.20
   3   4   2  244.88   30.60
   3   4   2  251.87   33.80
  -4  -4  -2  392.06   40.20
   4   4   2  477.95   43.40
   4   4   2  438.56   49.20
  -5  -4  -2   34.80   13.60
   5   4   2   91.99   23.70
   5   4   2   88.79   17.00
  -6  -4  -2  225.28   30.50
   6   4   2  289.37   31.40
   6   4   2  233.38   39.10
  -7  -4  -2    9.40   13.90
   7   4   2  -24.30   12.70
   7   4   2  -15.70    7.80
  -8  -4  -2  -12.00   12.50
   8   4   2  -11.20   20.50
   8   4   2   -1.20   10.50
  -9  -4  -2   17.50   17.50
   9   4   2    1.60   11.80
   9   4   2    5.60   20.00
 -10  -4  -2   89.59   28.80
  10   4   2  121.99   38.30
 -11  -4  -2   17.80   23.40
  11   4   2  -36.50   23.50
  12   4   2   14.70   28.80
  13   4   2  -19.80   28.70
  14   4   2    5.80   32.10
 -13   5   2   40.50   43.00
 -12   5   2   10.60   33.30
 -11   5   2   27.20   30.40
  10  -5  -2  -21.60   20.10
 -10   5   2   -9.30   21.20
   9  -5  -2   80.09   28.50
  -9   5   2   16.70   27.10
   8  -5  -2   -1.50   18.10
  -8   5   2  -17.40   18.40
   7  -5  -2  -10.10   13.30
  -7   5   2   16.40   21.60
   6  -5  -2  115.59   24.30
  -6   5   2   79.49   30.20
   5  -5  -2  800.52   73.69
  -5   5   2  816.62   81.99
  -5   5   2  714.13   69.49
   4  -5  -2   33.40   15.70
  -4   5   2  -30.40   11.30
  -4   5   2   -2.10   10.70
   3  -5  -2  116.09   19.10
  -3   5   2  146.89   21.40
  -3   5   2  137.29   27.20
   2  -5  -2  100.29   16.90
  -2   5   2  125.69   24.10
  -2   5   2  135.39   21.50
   1  -5  -2   43.10    9.20
  -1   5   2   43.60   15.40
  -1   5   2   59.89   17.80
  -1   5   2   36.50    9.30
   0  -5  -2   76.19   12.30
   0   5   2   87.29   17.40
   0   5   2   56.79   17.40
   0   5   2   67.09   11.50
  -1  -5  -2  961.60   80.59
   1   5   2  925.21   83.19
   1   5   2  915.01   79.09
  -2  -5  -2 2554.94  212.28
  -2  -5  -2 2489.55  206.98
  -2  -5  -2 2594.64  206.98
   2   5   2 2680.53  213.28
   2   5   2 2629.64  212.68
  -3  -5  -2  219.28   32.10
  -3  -5  -2  246.98   22.00
   3   5   2  240.68   21.80
   3   5   2  168.68   28.50
   3   5   2  198.28   32.50
  -4  -5  -2   37.50    9.50
   4   5   2   12.00   15.30
   4   5   2   26.60    9.10
   4   5   2   34.90   13.60
  -5  -5  -2  170.88   22.10
   5   5   2  199.48   26.60
   5   5   2  133.59   31.60
  -6  -5  -2   44.60   14.40
   6   5   2   34.30   14.20
   6   5   2   65.49   23.00
  -7  -5  -2  170.68   28.10
   7   5   2  119.19   29.90
   7   5   2  172.78   27.40
  -8  -5  -2   76.09   22.70
   8   5   2   79.09   27.30
   8   5   2  104.69   21.80
  -9  -5  -2    5.40   16.50
   9   5   2  -10.40   21.50
   9   5   2    1.60   12.90
 -10  -5  -2   99.39   27.50
  10   5   2   74.19   31.70
 -11  -5  -2   83.99   28.50
  11   5   2   52.29   31.90
  12   5   2   -4.90   30.10
  13   5   2  -12.40   29.70
  14   5   2   -1.40   33.90
 -13   6   2  -60.19   27.80
 -12   6   2   21.80   33.30
 -11   6   2  -13.40   24.20
  10  -6  -2   14.90   25.80
 -10   6   2   16.70   26.70
   9  -6  -2   12.40   18.50
  -9   6   2   22.90   28.10
   8  -6  -2   26.30   21.30
  -8   6   2   91.29   34.50
   7  -6  -2   38.50   18.60
  -7   6   2   28.90   23.00
   6  -6  -2   90.49   21.70
  -6   6   2   50.09   17.00
  -6   6   2  107.49   33.70
   5  -6  -2    0.30    9.30
  -5   6   2  -19.80   16.20
  -5   6   2   -8.10   10.20
   4  -6  -2   -1.90    8.30
  -4   6   2   -9.40   10.90
  -4   6   2   -6.50   13.50
   3  -6  -2   38.90   12.70
  -3   6   2   59.29   20.80
  -3   6   2   46.10   19.60
   2  -6  -2  860.21   79.39
  -2   6   2  919.51   85.19
  -2   6   2  940.01   81.19
   1  -6  -2   97.59   15.20
  -1   6   2   77.29   19.70
  -1   6   2  121.49   23.50
   0  -6  -2   15.70    9.00
   0   6   2    9.00   13.30
   0   6   2   32.30   13.50
  -1  -6  -2  381.96   38.20
   1   6   2  386.06   42.20
   1   6   2  361.76   36.50
  -2  -6  -2   76.79   18.60
  -2  -6  -2   70.29   11.30
  -2  -6  -2   81.79   12.50
   2   6   2   43.50   17.50
  -3  -6  -2  131.19   13.10
  -3  -6  -2  131.99   24.00
  -3  -6  -2  110.29   13.10
   3   6   2  110.19   22.20
   3   6   2  177.28   28.80
  -4  -6  -2  788.52   65.79
  -4  -6  -2  761.82   77.09
   4   6   2  859.81   79.19
   4   6   2  776.32   65.69
   4   6   2  813.92   74.19
  -5  -6  -2  333.37   32.80
   5   6   2  369.36   40.30
   5   6   2  339.47   45.40
  -6  -6  -2  127.29   20.00
   6   6   2  116.79   23.50
   6   6   2  114.19   30.50
  -7  -6  -2   -6.70   11.00
   7   6   2    0.70   11.30
   7   6   2    1.50   19.10
  -8  -6  -2  -13.20   11.50
   8   6   2    9.50   18.20
   8   6   2  -16.70   10.10
  -9  -6  -2  140.39   28.30
   9   6   2  138.49   27.80
   9   6   2  115.39   38.20
 -10  -6  -2    6.20   16.70
  10   6   2  -11.30   23.00
  11   6   2  183.88   48.30
  12   6   2   18.40   29.10
  13   6   2   17.70   36.00
  14   6   2   24.00   39.10
 -12   7   2   -8.60   32.70
 -11   7   2   27.90   34.90
 -10   7   2   40.90   35.90
   9  -7  -2    0.00   20.10
  -9   7   2  -41.80   18.50
   8  -7  -2  -15.80   15.30
  -8   7   2    3.50   26.30
   7  -7  -2   -8.10   12.80
  -7   7   2  -12.40   20.20
   6  -7  -2  163.58   29.70
  -6   7   2  176.28   28.70
  -6   7   2  142.39   36.50
   5  -7  -2  161.78   25.70
  -5   7   2   82.49   27.80
  -5   7   2  149.69   25.30
   4  -7  -2   29.40   13.20
  -4   7   2   20.00   20.70
  -4   7   2    6.50   12.10
   3  -7  -2  261.27   36.00
  -3   7   2  347.57   36.70
  -3   7   2  267.37   40.00
   2  -7  -2   26.40   12.10
  -2   7   2    2.50   15.20
  -2   7   2   56.49   17.70
   1  -7  -2   79.59   14.60
  -1   7   2   63.29   18.90
  -1   7   2  100.39   21.40
   0  -7  -2   19.40    9.60
   0   7   2  -10.80   14.60
   0   7   2   25.20   13.60
  -1  -7  -2   -3.20    9.60
   1   7   2    8.30   10.40
   1   7   2   24.00   15.30
  -2  -7  -2  114.69   21.90
  -2  -7  -2  147.49   19.20
  -2  -7  -2  113.39   16.70
   2   7   2  136.29   17.00
   2   7   2  106.19   24.90
  -3  -7  -2   68.29    8.80
  -3  -7  -2   52.29   17.00
  -3  -7  -2   56.09    8.40
   3   7   2   33.30   16.90
   3   7   2   23.70   18.80
  -4  -7  -2   -5.20   14.00
   4   7   2    4.50   15.30
   4   7   2    2.40   12.40
  -5  -7  -2    2.10    5.80
  -5  -7  -2  -31.30   12.10
   5   7   2   10.90   13.50
   5   7   2  -13.80    6.50
   5   7   2    9.00   16.40
  -6  -7  -2   12.80    8.20
   6   7   2  -15.70   16.30
   6   7   2  -10.30   11.70
  -7  -7  -2   64.59   16.20
   7   7   2   79.99   28.80
   7   7   2   70.09   21.00
  -8  -7  -2   11.40   11.80
   8   7   2    4.60   14.10
   8   7   2   32.80   25.50
  -9  -7  -2   -6.80   14.00
   9   7   2   29.00   18.10
   9   7   2    5.60   21.60
  10   7   2   37.20   27.70
  10   7   2   -8.50   26.30
  11   7   2  119.39   41.30
  12   7   2   18.60   29.80
  13   7   2   10.90   33.60
  14   7   2   47.70   45.90
 -12   8   2   -8.80   37.50
 -11   8   2   17.70   35.40
 -10   8   2  -32.10   22.60
  -9   8   2   81.99   36.60
   8  -8  -2    2.70   18.20
  -8   8   2   19.70   26.10
   7  -8  -2   73.99   24.10
  -7   8   2  147.39   38.80
   6  -8  -2   49.50   19.10
  -6   8   2   35.30   15.90
  -6   8   2  -28.70   18.10
   5  -8  -2   -2.90   12.00
  -5   8   2   -5.00   21.00
  -5   8   2   -5.60   11.00
   4  -8  -2   35.50   16.60
  -4   8   2   40.20   25.10
  -4   8   2   23.50   14.20
   3  -8  -2  102.09   26.30
  -3   8   2   46.80   21.70
  -3   8   2  136.09   24.50
   2  -8  -2 2144.79  171.58
  -2   8   2 1907.71  175.38
  -2   8   2 2012.30  172.68
   1  -8  -2  214.08   25.50
  -1   8   2  230.68   33.00
  -1   8   2  204.78   30.50
   0  -8  -2  789.02   69.49
   0   8   2  819.32   75.79
   0   8   2  742.63   71.99
  -1  -8  -2  238.38   31.50
   1   8   2  297.77   32.20
   1   8   2  255.77   36.80
  -2  -8  -2    9.10   13.10
   2   8   2   22.40   15.40
   2   8   2   17.20    9.10
  -3  -8  -2   98.99   12.20
  -3  -8  -2   59.49   20.50
  -3  -8  -2   84.69   11.30
   3   8   2   86.09   22.40
  -4  -8  -2  449.66   53.99
   4   8   2  531.25   58.09
   4   8   2  509.35   54.79
  -5  -8  -2  162.48   32.10
   5   8   2  131.79   32.60
   5   8   2  133.59   28.00
  -6  -8  -2  268.87   24.70
   6   8   2  173.28   40.50
   6   8   2  248.48   24.70
   6   8   2  241.88   39.30
  -7  -8  -2   39.90   11.60
   7   8   2   66.19   21.50
   7   8   2   32.70   24.00
  -8  -8  -2   15.50   10.80
   8   8   2  -16.10   12.60
   8   8   2   14.80   21.00
   9   8   2   24.60   17.50
   9   8   2    6.70   23.80
  10   8   2   17.60   19.10
  10   8   2  -39.40   20.20
  11   8   2  153.48   48.30
  12   8   2  -11.90   29.60
  13   8   2   17.80   33.50
  14   8   2  -31.60   34.90
 -12   9   2   57.09   40.30
 -11   9   2  -26.20   31.50
 -10   9   2   -3.00   34.40
  -9   9   2   -2.60   25.00
  -8   9   2   11.90   25.20
   7  -9  -2   99.09   25.90
  -7   9   2    8.40   23.30
   6  -9  -2   -5.00   13.30
  -6   9   2   41.40   26.80
  -6   9   2   -4.50   14.80
   5  -9  -2   25.50   16.70
  -5   9   2  -11.80   21.30
  -5   9   2   15.90   15.60
   4  -9  -2   11.50   16.10
  -4   9   2   -3.50   12.40
  -4   9   2   13.80   22.40
   3  -9  -2  169.38   26.10
  -3   9   2  178.58   28.70
  -3   9   2  105.89   30.40
   2  -9  -2  343.07   38.40
  -2   9   2  343.27   46.30
  -2   9   2  354.26   44.70
   1  -9  -2  252.67   34.80
  -1   9   2  348.37   40.70
  -1   9   2  315.27   39.90
   0  -9  -2  148.99   26.30
   0   9   2  229.08   36.40
   0   9   2  228.68   30.00
  -1  -9  -2  307.17   34.00
   1   9   2  325.37   40.90
   1   9   2  226.68   32.00
  -2  -9  -2  -12.10   11.50
   2   9   2   -6.30    8.90
   2   9   2   52.89   17.80
  -3  -9  -2   31.10    8.90
  -3  -9  -2   28.40   17.00
  -3  -9  -2   88.69   12.80
   3   9   2   72.79   23.80
  -4  -9  -2  126.39   27.70
   4   9   2  120.19   26.30
   4   9   2  149.99   30.60
  -5  -9  -2  285.17   41.80
   5   9   2  258.77   43.20
   5   9   2  283.67   40.20
  -6  -9  -2  284.07   45.90
   6   9   2  328.27   48.10
   6   9   2  290.67   41.00
  -7  -9  -2   61.89   10.80
   7   9   2   28.10   19.10
   7   9   2   52.49   25.30
   8   9   2    9.20   22.90
   8   9   2   -0.40   15.10
   9   9   2   82.59   26.00
   9   9   2    9.30   24.60
  10   9   2    1.00   20.00
  10   9   2    0.90   21.60
  11   9   2   -9.50   24.20
  12   9   2    4.00   29.70
  13   9   2  -26.20   31.30
  14   9   2    6.50   37.90
 -11  10   2   -3.40   31.70
 -10  10   2  -10.60   32.50
  -9  10   2   44.30   35.20
  -8  10   2   31.10   31.80
  -7  10   2    9.60   24.20
   6 -10  -2    3.50   21.10
  -6  10   2   32.80   18.00
  -6  10   2   55.39   32.00
   5 -10  -2   -0.10   17.90
  -5  10   2   18.60   23.20
  -5  10   2   -3.50   14.50
   4 -10  -2  -22.10   13.60
  -4  10   2  -16.00   12.50
  -4  10   2  -16.20   20.50
   3 -10  -2  160.88   26.00
  -3  10   2  135.89   28.70
  -3  10   2  193.98   39.30
   2 -10  -2  776.62   65.89
  -2  10   2  720.03   71.09
  -2  10   2  562.24   70.89
   1 -10  -2  127.19   22.00
  -1  10   2  161.98   31.20
  -1  10   2   93.09   26.60
   0 -10  -2   -2.60   10.60
   0  10   2   20.00   14.20
   0  10   2   25.20   17.70
  -1 -10  -2   19.10   13.10
   1  10   2   33.40   20.10
   1  10   2   31.70   14.60
  -2 -10  -2   29.30   13.90
   2  10   2   -5.10    9.10
   2  10   2    8.80   17.60
  -3 -10  -2   -1.20   13.50
  -3 -10  -2   29.20    9.20
   3  10   2   21.70   18.10
   3  10   2   26.30    8.20
  -4 -10  -2  735.83   70.09
   4  10   2  578.24   67.79
   4  10   2  574.84   68.39
  -5 -10  -2  208.98   36.50
   5  10   2  117.89   34.30
   5  10   2  198.88   35.20
  -6 -10  -2  126.39   33.00
   6  10   2   59.99   26.00
   6  10   2   77.39   24.60
   7  10   2   -5.20   15.10
   7  10   2   -6.70   19.50
   8  10   2    7.40   23.10
   8  10   2  -17.80   15.60
   9  10   2  188.18   39.20
   9  10   2  172.58   46.10
  10  10   2  272.27   47.20
  10  10   2  278.17   60.09
  11  10   2   12.20   27.10
  12  10   2   57.49   41.10
  13  10   2    7.60   35.90
  14  10   2   13.80   39.60
 -11  11   2  -24.50   30.60
 -10  11   2    6.80   36.30
  -9  11   2   53.39   34.40
  -8  11   2   28.50   30.60
  -7  11   2    7.30   26.60
  -6  11   2   26.40   19.30
  -6  11   2   48.40   28.30
   5 -11  -2  -10.60   17.80
  -5  11   2  -24.80   14.20
  -5  11   2   35.40   26.00
   4 -11  -2  -15.10   11.30
  -4  11   2   -2.60   20.50
  -4  11   2   -7.10   14.30
   3 -11  -2   11.20   14.60
  -3  11   2   16.90   21.90
  -3  11   2   -2.40   14.20
   2 -11  -2    8.00   10.70
  -2  11   2   18.70   18.90
  -2  11   2   -1.40   14.70
   1 -11  -2  687.23   66.69
  -1  11   2  739.23   74.69
  -1  11   2  765.62   74.79
   0 -11  -2  226.78   29.00
   0  11   2  154.18   30.20
   0  11   2  230.78   39.20
  -1 -11  -2  105.59   21.80
   1  11   2   94.79   24.90
   1  11   2   97.49   22.00
  -2 -11  -2   -4.10   12.20
   2  11   2  -26.50   15.10
   2  11   2   15.50   11.80
  -3 -11  -2   65.19   13.40
  -3 -11  -2   51.99   20.20
   3  11   2   49.20   21.60
   3  11   2   43.10   12.00
  -4 -11  -2  131.19   31.10
   4  11   2  197.38   37.20
   4  11   2  143.29   31.80
  -5 -11  -2   26.10   19.40
   5  11   2   34.00   23.10
   5  11   2   48.20   22.50
  -6 -11  -2    1.40   18.20
   6  11   2    0.80   16.70
   6  11   2  -22.60   12.90
  -7 -11  -2   68.99   30.70
   7  11   2   61.29   24.20
   7  11   2   45.60   28.60
   8  11   2   -4.60   18.20
   8  11   2   15.90   22.30
   9  11   2  -22.10   19.60
   9  11   2  -49.70   14.40
  10  11   2  -14.20   19.10
  10  11   2  -12.50   23.70
  11  11   2    5.10   28.00
  11  11   2  -31.90   25.30
  12  11   2   -6.50   30.80
  13  11   2   14.00   32.70
  14  11   2   94.39   48.00
 -11  12   2   28.40   36.40
 -10  12   2   19.00   44.80
  -9  12   2  -40.10   30.30
  -8  12   2  -13.40   27.80
  -7  12   2    3.40   30.50
  -6  12   2   83.29   36.30
  -5  12   2  114.19   27.80
  -5  12   2   51.19   29.70
   4 -12  -2   24.50   16.40
  -4  12   2   18.00   18.60
  -4  12   2   23.80   26.20
   3 -12  -2   -5.80   10.60
  -3  12   2   -3.20   20.50
  -3  12   2   20.80   18.40
   2 -12  -2   16.50   14.50
  -2  12   2   24.90   19.40
  -2  12   2   33.80   22.00
   1 -12  -2  220.08   30.70
  -1  12   2  255.97   43.00
  -1  12   2  237.48   40.10
   0 -12  -2  108.39   23.00
   0  12   2  142.79   28.20
   0  12   2  144.59   32.20
  -1 -12  -2   21.00   15.80
   1  12   2   40.20   22.50
   1  12   2   12.50   14.10
  -2 -12  -2  513.05   55.99
   2  12   2  503.05   50.79
   2  12   2  543.05   62.29
  -3 -12  -2  155.38   19.90
  -3 -12  -2  114.89   27.80
   3  12   2  121.19   19.50
   3  12   2  141.29   31.80
  -4 -12  -2   94.79   27.00
   4  12   2  115.99   30.80
  -5 -12  -2   10.90   19.30
   5  12   2   -6.10   19.30
   5  12   2   54.89   23.10
  -6 -12  -2  339.67   52.49
   6  12   2  344.07   51.69
   6  12   2  414.56   57.59
  -7 -12  -2   -9.90   18.40
   7  12   2   -7.70   18.60
   7  12   2   -2.00   19.30
   8  12   2    9.40   21.50
   8  12   2   53.29   30.10
   9  12   2   48.70   28.30
   9  12   2   45.30   29.60
  10  12   2  143.69   45.60
  10  12   2  106.79   33.40
  11  12   2   38.70   27.80
  11  12   2   65.29   41.30
  12  12   2  -10.30   28.90
  13  12   2  -31.70   32.70
  14  12   2   23.80   40.60
 -10  13   2  -32.20   30.90
  -9  13   2  -18.80   31.10
  -8  13   2   -0.30   26.00
  -7  13   2   14.90   32.10
  -6  13   2    1.40   25.00
  -5  13   2  -37.70   22.30
  -5  13   2  -40.00   14.60
  -4  13   2   23.30   22.30
  -4  13   2    0.20   26.50
   3 -13  -2   -4.80   12.40
  -3  13   2   10.20   18.40
  -3  13   2    2.10   22.60
   2 -13  -2   19.50   13.60
  -2  13   2  -10.10   16.00
  -2  13   2   39.20   23.80
   1 -13  -2   39.30   14.30
  -1  13   2   -3.70   17.50
  -1  13   2   40.30   24.10
   0 -13  -2  115.39   24.30
   0  13   2   80.79   25.00
   0  13   2  160.78   34.50
  -1 -13  -2    7.00   12.70
   1  13   2  -27.00   11.70
   1  13   2  -12.30   18.60
  -2 -13  -2   11.80   15.60
   2  13   2  -10.00   11.00
   2  13   2    0.20   19.20
  -3 -13  -2  433.46   55.19
   3  13   2  621.44   64.29
   3  13   2  448.76   45.70
  -4 -13  -2   55.99   25.20
  -4 -13  -2  102.49   14.40
   4  13   2   42.80   23.40
  -5 -13  -2  423.86   56.49
   5  13   2  392.26   58.49
   5  13   2  407.06   56.79
  -6 -13  -2  180.68   38.70
   6  13   2  198.48   42.70
   6  13   2  106.49   32.50
  -7 -13  -2   59.09   30.90
   7  13   2   33.60   26.60
   7  13   2    8.70   23.80
   8  13   2   -4.50   22.00
   8  13   2   -2.10   22.30
   9  13   2  -33.40   21.40
   9  13   2   11.70   22.80
  10  13   2   64.09   30.10
  10  13   2  138.19   45.20
  11  13   2   21.70   26.50
  11  13   2   37.30   37.60
  12  13   2  -14.30   36.40
  13  13   2   23.80   38.60
  14  13   2  -47.00   31.70
 -10  14   2   68.19   47.90
  -9  14   2  -10.80   31.20
  -8  14   2   18.20   37.40
  -7  14   2   -7.80   26.50
  -6  14   2   62.19   34.00
  -5  14   2   21.80   30.80
  -5  14   2   42.40   23.10
  -4  14   2  -25.10   16.50
  -4  14   2  -18.50   21.80
  -3  14   2   39.50   25.50
  -3  14   2  -37.10   19.40
   2 -14  -2   22.50   12.90
  -2  14   2  -22.70   16.70
  -2  14   2   -2.80   19.10
   1 -14  -2  105.79   24.10
  -1  14   2  133.39   33.00
  -1  14   2  120.29   33.30
   0 -14  -2   25.70   16.90
   0  14   2   72.39   27.80
   0  14   2   46.60   23.30
  -1 -14  -2  125.99   27.20
   1  14   2  119.79   35.10
   1  14   2  136.89   28.40
  -2 -14  -2   36.80   19.20
   2  14   2   21.50   23.30
   2  14   2   48.10   18.10
  -3 -14  -2  -11.60   14.40
   3  14   2    1.20    9.80
   3  14   2   11.40   20.10
  -4 -14  -2   13.00   19.40
   4  14   2   14.70   20.40
  -5 -14  -2  353.46   54.59
   5  14   2  372.76   56.49
   5  14   2  377.36   54.19
  -6 -14  -2   -6.50   18.80
   6  14   2   13.80   24.00
   6  14   2    2.30   22.60
  -7 -14  -2    9.30   23.20
   7  14   2   22.90   27.10
   7  14   2   63.69   31.90
  -8 -14  -2  -17.50   21.00
   8  14   2  -17.40   19.30
   8  14   2  -16.90   23.10
   9  14   2   11.10   25.20
   9  14   2   -3.70   20.90
  10  14   2   10.40   25.10
  10  14   2  -22.10   26.00
  11  14   2   -4.40   23.90
  11  14   2   47.90   40.60
  12  14   2   23.70   36.90
  13  14   2   11.70   42.80
  14  14   2    2.70   41.40
  -9  15   2    9.80   35.50
  -8  15   2   -1.30   34.60
  -7  15   2  -33.60   28.50
  -6  15   2    8.10   25.10
  -5  15   2   75.19   26.80
  -5  15   2  109.19   43.70
  -4  15   2   80.99   38.20
  -4  15   2   91.09   29.70
  -3  15   2   14.90   26.00
  -3  15   2   -4.30   19.50
  -2  15   2   31.80   26.00
  -2  15   2   -1.00   23.60
   1 -15  -2   92.29   23.90
  -1  15   2  110.29   33.20
  -1  15   2   62.89   28.90
   0 -15  -2   61.49   20.90
   0  15   2   51.99   23.70
   0  15   2   38.40   27.60
  -1 -15  -2   12.20   15.20
   1  15   2   12.40   18.30
   1  15   2    8.90   23.30
  -2 -15  -2  131.19   30.80
   2  15   2  139.89   37.40
   2  15   2  114.79   26.00
  -3 -15  -2  299.67   46.30
   3  15   2  349.77   53.79
   3  15   2  356.36   38.40
  -4 -15  -2   64.19   23.80
   4  15   2  -23.90   17.60
  -5 -15  -2   -2.50   17.80
   5  15   2   -9.10   20.50
   5  15   2  -23.00   20.50
  -6 -15  -2  -14.10   20.70
   6  15   2   18.30   26.60
   6  15   2   20.40   22.80
  -7 -15  -2  -11.60   19.30
   7  15   2   41.90   28.70
   7  15   2   14.70   28.50
  -8 -15  -2    5.70   28.10
   8  15   2  -18.10   27.10
   8  15   2   33.40   24.60
   9  15   2   37.10   30.00
   9  15   2  -18.60   20.20
  10  15   2  -14.00   22.40
  10  15   2   -6.00   28.90
  11  15   2   -9.70   29.30
  11  15   2  -10.80   26.00
  12  15   2  -12.60   33.00
  13  15   2   -7.30   39.40
  -9  16   2   18.10   40.90
  -8  16   2   -0.70   28.10
  -7  16   2  -34.90   30.20
  -6  16   2    4.70   31.20
  -5  16   2    2.20   30.90
  -4  16   2    5.40   21.30
  -4  16   2  -17.40   27.10
  -3  16   2   -1.60   24.20
  -3  16   2    0.40   19.90
  -2  16   2  169.88   40.90
  -2  16   2    9.90   26.50
  -1  16   2   24.80   24.30
  -1  16   2   10.90   23.10
   0 -16  -2   27.80   20.40
   0  16   2   85.29   35.70
   0  16   2  -10.20   18.30
  -1 -16  -2    0.20   16.80
   1  16   2   28.00   25.30
   1  16   2   39.00   21.20
  -2 -16  -2    9.50   18.10
   2  16   2    6.10   16.10
   2  16   2   26.50   24.40
  -3 -16  -2   15.70   17.50
   3  16   2   26.40   25.90
  -4 -16  -2   13.00   20.40
   4  16   2   18.80   24.70
  -5 -16  -2    9.60   20.60
   5  16   2  -26.10   24.00
   5  16   2   -2.90   20.50
  -6 -16  -2  227.98   49.20
   6  16   2  150.08   43.80
   6  16   2  336.57   60.59
  -7 -16  -2    5.80   24.80
   7  16   2   -0.60   26.10
   7  16   2    5.90   20.70
  -8 -16  -2   51.19   31.30
   8  16   2   20.30   29.70
   8  16   2   24.90   30.90
   9  16   2    2.90   27.10
   9  16   2    3.20   30.30
  10  16   2   54.99   35.20
  10  16   2   84.19   43.60
  11  16   2   -1.40   36.10
  11  16   2  -25.70   23.70
  12  16   2  -18.50   33.90
  12  16   2    2.80   29.80
  13  16   2   -6.70   40.10
  -8  17   2  -30.50   28.50
  -7  17   2  -19.20   36.00
  -6  17   2  -41.90   24.80
  -5  17   2    0.00   32.60
  -4  17   2  -17.10   24.00
  -4  17   2   79.59   30.50
  -3  17   2  -35.60   22.80
  -3  17   2  -23.10   19.80
  -2  17   2  -15.50   22.30
  -2  17   2   33.00   27.70
  -1  17   2  -14.80   27.10
  -1  17   2   22.50   26.20
   0  17   2   21.70   24.30
   0  17   2   19.40   24.60
  -1 -17  -2    0.90   19.20
   1  17   2   -8.90   16.90
   1  17   2  -12.80   25.30
  -2 -17  -2    6.60   17.90
   2  17   2  -36.80   17.30
  -3 -17  -2   -4.90   18.60
   3  17   2    7.40   22.80
  -4 -17  -2   45.00   27.90
   4  17   2   30.30   26.30
  -5 -17  -2   31.80   25.20
   5  17   2   14.00   27.20
   5  17   2  -26.10   20.30
  -6 -17  -2   10.30   24.10
   6  17   2   21.00   26.30
   6  17   2   57.09   31.90
  -7 -17  -2   56.19   31.60
   7  17   2   41.70   33.30
   7  17   2  131.09   40.40
  -8 -17  -2  -17.70   25.00
   8  17   2  -13.30   23.20
   8  17   2   -4.40   27.00
   9  17   2   -4.20   24.60
   9  17   2    0.20   30.00
  10  17   2  -25.60   28.50
  10  17   2   28.10   32.10
  11  17   2    0.00   34.30
  11  17   2  -24.90   25.10
  12  17   2  -16.40   35.60
  12  17   2  -36.40   29.50
  13  17   2   24.30   42.50
  -7  18   2  -14.40   27.80
  -6  18   2   24.40   38.60
  -5  18   2   19.30   32.00
  -4  18   2   24.30   29.30
  -4  18   2   -8.50   31.40
  -3  18   2    6.20   31.30
  -3  18   2   33.60   26.90
  -2  18   2    4.50   28.20
  -2  18   2    7.40   26.90
  -1  18   2   60.59   32.00
  -1  18   2   60.59   29.70
   0  18   2   10.10   25.10
   0  18   2    7.40   21.50
   1  18   2   29.30   24.50
   1  18   2   10.90   30.70
  -2 -18  -2   14.30   20.70
   2  18   2   25.70   34.70
  -3 -18  -2    7.40   20.70
   3  18   2   20.00   29.10
  -4 -18  -2   -1.20   22.80
   4  18   2   52.69   34.30
  -5 -18  -2   -3.30   23.00
   5  18   2   57.49   30.90
   5  18   2   -7.50   20.90
  -6 -18  -2  108.29   39.00
   6  18   2   90.69   36.60
   6  18   2   92.29   38.80
  -7 -18  -2  -15.00   22.30
   7  18   2   13.70   29.50
   7  18   2   24.20   26.90
  -8 -18  -2   41.60   31.40
   8  18   2   47.10   36.20
   8  18   2    4.00   28.50
   9  18   2   -6.20   23.20
   9  18   2  -10.20   29.70
  10  18   2   57.99   34.60
  10  18   2  -18.30   31.30
  11  18   2    1.90   35.30
  11  18   2  -48.60   24.80
  12  18   2  -20.00   36.60
  12  18   2   33.80   36.30
  -7  19   2   11.90   40.60
  -6  19   2    1.80   40.00
  -5  19   2    9.70   38.30
  -4  19   2  -14.40   25.60
  -3  19   2   12.90   32.90
  -3  19   2  -34.30   22.10
  -2  19   2  -16.50   25.00
  -2  19   2   43.60   32.10
  -1  19   2   23.20   29.10
  -1  19   2   15.60   26.10
   0  19   2    7.30   24.60
   0  19   2   -2.50   29.50
   1  19   2   24.00   29.20
   2  19   2   15.70   32.20
  -3 -19  -2  -11.60   20.60
   3  19   2   41.10   31.90
  -4 -19  -2   -3.60   24.10
   4  19   2   26.00   28.80
  -5 -19  -2   50.59   31.10
   5  19   2   -3.90   27.10
   5  19   2   65.79   36.80
  -6 -19  -2   26.20   27.90
   6  19   2  -16.50   26.70
   6  19   2  -18.20   24.10
  -7 -19  -2   79.89   38.00
   7  19   2   38.00   38.50
   7  19   2  117.59   45.30
  -8 -19  -2    0.60   26.50
   8  19   2  -19.30   26.80
   8  19   2  -44.20   25.40
   9  19   2   -0.30   29.30
   9  19   2    8.50   36.60
  10  19   2   -7.30   30.00
  10  19   2    1.10   35.60
  11  19   2   64.09   37.20
  11  19   2   40.30   43.50
  12  19   2  -50.39   28.60
  12  19   2   78.59   53.59
  -6  20   2   23.80   38.30
  -5  20   2    1.00   35.80
  -4  20   2    5.40   35.50
  -3  20   2   18.90   32.90
  -3  20   2   -1.20   26.70
  -2  20   2   34.00   30.50
  -2  20   2   42.10   35.30
  -1  20   2   26.40   30.30
  -1  20   2   75.89   37.40
   0  20   2  -44.10   24.90
   1  20   2    6.70   25.40
   2  20   2  -36.90   23.90
   3  20   2    0.60   30.00
  -4 -20  -2   29.50   26.70
   4  20   2   95.59   41.80
  -5 -20  -2   35.60   30.10
   5  20   2   46.70   35.20
   5  20   2   19.40   30.50
  -6 -20  -2   -3.00   29.00
   6  20   2   48.40   36.80
   6  20   2   53.09   35.80
  -7 -20  -2   -4.50   27.40
   7  20   2   32.90   30.60
   7  20   2    1.40   30.40
  -8 -20  -2   -3.00   29.10
   8  20   2    6.50   30.30
   8  20   2   24.10   31.80
   9  20   2  -17.00   36.70
   9  20   2  -19.50   31.10
  10  20   2   38.00   35.80
  10  20   2  -19.00   30.10
  11  20   2  -20.30   31.20
  11  20   2   12.10   38.10
  -5  21   2   35.80   45.20
  -4  21   2   15.10   36.60
  -3  21   2  -18.50   29.60
  -3  21   2    5.70   31.00
  -2  21   2   16.70   34.10
  -2  21   2  -17.70   27.70
  -1  21   2   26.50   33.40
   0  21   2   81.59   39.60
   1  21   2    2.60   28.50
   2  21   2  -44.60   28.90
   3  21   2   22.20   30.90
   4  21   2   77.19   40.60
  -5 -21  -2   46.90   33.80
   5  21   2   -2.90   29.40
   5  21   2   47.10   38.80
  -6 -21  -2   22.00   32.80
   6  21   2   20.80   34.10
   6  21   2    5.70   30.00
  -7 -21  -2   72.99   38.20
   7  21   2  -41.00   28.40
   7  21   2  -31.60   33.70
  -8 -21  -2    8.90   33.50
   8  21   2  -23.90   33.00
   8  21   2   13.70   35.90
   9  21   2  -25.60   37.30
   9  21   2    9.40   36.40
  10  21   2  -27.20   31.20
  10  21   2   19.30   38.50
  11  21   2  -27.10   33.90
  11  21   2    3.00   37.90
  -4  22   2    8.80   35.80
  -3  22   2  -21.20   34.90
  -2  22   2   18.70   37.20
  -1  22   2   -9.90   28.80
   0  22   2   -8.10   32.50
   1  22   2   28.60   34.90
   2  22   2    2.60   32.40
   3  22   2  -22.80   27.80
   4  22   2   73.39   43.80
   5  22   2   50.39   38.20
   5  22   2  -52.49   33.70
  -6 -22  -2   46.60   35.00
   6  22   2   22.70   35.20
   6  22   2   26.90   33.10
  -7 -22  -2   13.80   31.70
   7  22   2   62.89   40.20
   7  22   2   31.30   38.10
  -8 -22  -2  -30.50   30.90
   8  22   2  -23.90   36.20
   8  22   2  -45.10   24.70
   9  22   2  -50.59   26.20
   9  22   2   -0.30   41.70
  10  22   2  -14.80   34.50
  10  22   2  -10.90   35.40
  -2  23   2   -9.60   32.00
  -1  23   2   38.30   41.50
   0  23   2   19.60   37.80
   1  23   2   33.00   40.50
   2  23   2  -65.79   26.70
   3  23   2   38.80   35.60
   4  23   2  -47.10   32.00
   5  23   2  -16.20   32.00
   6  23   2   -5.50   41.10
   6  23   2   30.50   38.60
  -7 -23  -2   -2.60   38.80
   7  23   2  -24.30   30.20
   7  23   2  -36.60   33.60
  -8 -23  -2    2.70   34.60
   8  23   2   26.80   40.90
   8  23   2  -19.10   34.60
   9  23   2  -13.10   32.50
   9  23   2  -25.70   38.50
  -1  24   2   58.19   44.80
   0  24   2   11.90   40.00
   1  24   2    0.40   36.40
   2  24   2   -7.10   37.40
   3  24   2  -26.90   34.60
   4  24   2   -7.70   36.70
   5  24   2   39.40   43.70
   6  24   2  -53.79   36.10
   7  24   2   35.60   43.00
   7  24   2   17.00   41.50
   8  24   2  -41.90   37.60
   8  24   2  -18.00   36.10
   0  25   2  -52.49   35.20
   1  25   2   43.90   45.90
   2  25   2   26.90   40.70
   3  25   2   58.49   43.30
   4  25   2   25.80   42.30
   5  25   2   28.70   42.20
   6  25   2   10.30   40.10
   7  25   2   22.10   36.30
   5  25  -3    4.10   39.80
   4  25  -3   79.59   49.99
   3  25  -3   30.20   44.00
   2  25  -3  -24.80   41.40
   7  24  -3   33.20   48.60
   7  24  -3    2.00   36.10
  -7 -24   3   12.00   39.70
   6  24  -3   43.90   42.10
  -6 -24   3   43.10   40.50
   5  24  -3   -0.80   34.30
   4  24  -3   12.40   40.40
   3  24  -3   57.29   42.70
   2  24  -3  -17.40   39.00
   1  24  -3  -82.29   28.10
   0  24  -3   26.50   41.70
  -1  24  -3   -5.60   39.70
   9  23  -3    5.10   40.20
   8  23  -3  -42.10   30.40
   8  23  -3   13.50   38.80
  -8 -23   3   18.90   38.30
   7  23  -3  -33.70   29.00
  -7 -23   3   -0.30   34.00
   6  23  -3   35.90   35.10
  -6 -23   3   -6.90   30.40
   5  23  -3   90.99   45.70
  -5 -23   3  -17.00   32.60
   4  23  -3  -70.39   28.80
  -4 -23   3  -16.20   57.49
   3  23  -3    4.70   35.20
   2  23  -3  -20.10   31.70
   1  23  -3  -20.20   33.70
   0  23  -3  -45.80   29.20
  -1  23  -3    6.00   32.10
  10  22  -3   11.80   43.60
   9  22  -3   10.30   43.20
   9  22  -3    4.80   36.30
  -9 -22   3  -29.40   35.30
   8  22  -3  -36.00   28.60
   8  22  -3   12.40   39.80
  -8 -22   3   -4.10   35.70
   7  22  -3   -3.70   29.00
  -7 -22   3   11.90   34.70
   6  22  -3   25.60   37.00
  -6 -22   3   57.59   39.80
   5  22  -3   19.40   29.30
  -5 -22   3    4.00   33.10
   4  22  -3   46.70   36.10
  -4 -22   3   26.00   30.00
   3  22  -3   11.00   33.70
  -3 -22   3  -21.40   29.00
   2  22  -3    0.00   32.90
   1  22  -3   12.20   32.30
   0  22  -3  -49.20   27.00
  -1  22  -3    8.60   33.50
  -2  22  -3    2.40   35.50
  -3  22  -3  -31.20   45.30
  -4  22  -3   11.60   38.70
  10  21  -3   -5.10   35.60
  10  21  -3    4.20   43.10
 -10 -21   3   16.80   36.60
   9  21  -3   35.50   48.30
   9  21  -3   11.00   37.80
  -9 -21   3    7.80   37.90
   8  21  -3    2.90   31.00
   8  21  -3  -51.89   32.50
  -8 -21   3  -15.40   31.80
   7  21  -3   10.20   34.10
  -7 -21   3   -9.60   29.10
   6  21  -3   32.90   36.80
  -6 -21   3  -12.70   27.00
   5  21  -3   33.60   36.80
  -5 -21   3   36.20   32.40
   4  21  -3   61.89   38.30
  -4 -21   3    4.30   28.90
   3  21  -3   27.60   30.80
  -3 -21   3  -31.80   24.10
   2  21  -3   43.60   36.80
  -2 -21   3   18.70   29.50
   1  21  -3   25.50   30.50
   0  21  -3  -39.20   29.80
  -1  21  -3   -2.30   29.80
  -2  21  -3  -30.30   29.70
  -2  21  -3   15.80   32.30
  -3  21  -3   67.59   43.90
  -4  21  -3   46.70   42.40
  -5  21  -3  -12.40   35.80
  11  20  -3  -63.29   33.70
  11  20  -3    7.20   40.70
 -11 -20   3  -27.40   40.00
  10  20  -3  -56.29   35.20
  10  20  -3    5.70   31.90
 -10 -20   3    7.50   34.70
   9  20  -3   30.40   38.60
   9  20  -3  -28.10   24.90
  -9 -20   3   26.40   37.30
   8  20  -3    9.70   32.10
   8  20  -3  -68.09   30.50
  -8 -20   3  -15.80   26.30
   7  20  -3   56.09   38.90
  -7 -20   3  128.79   44.70
   6  20  -3   15.10   32.70
  -6 -20   3  -28.40   26.20
   5  20  -3   53.49   35.60
  -5 -20   3   16.00   29.30
   4  20  -3   13.70   32.20
  -4 -20   3  -16.40   23.80
   3  20  -3   16.40   27.70
  -3 -20   3   18.20   28.60
   2  20  -3   53.19   33.80
  -2 -20   3  -15.70   21.40
   1  20  -3    0.70   28.90
  -1 -20   3   56.59   30.50
   0  20  -3   -8.60   29.10
  -1  20  -3  -13.80   31.00
  -1  20  -3   31.10   34.00
  -2  20  -3   18.40   34.40
  -2  20  -3   15.90   30.30
  -3  20  -3   27.10   35.00
  -4  20  -3   10.10   35.90
  -5  20  -3   -2.60   35.40
  -6  20  -3   27.50   40.80
  11  19  -3  -25.20   33.40
  11  19  -3   16.90   43.90
 -11 -19   3  -67.29   27.90
  10  19  -3   27.10   40.90
  10  19  -3   -6.60   30.80
 -10 -19   3  -10.20   28.50
   9  19  -3   22.70   37.00
   9  19  -3   45.80   41.00
  -9 -19   3   -4.70   33.00
   8  19  -3    3.00   30.10
   8  19  -3  -22.20   32.30
  -8 -19   3  -16.40   29.50
   7  19  -3   11.80   31.30
  -7 -19   3   28.70   31.10
   6  19  -3   35.20   31.00
  -6 -19   3   24.90   33.90
   5  19  -3   33.60   34.60
  -5 -19   3    9.90   28.90
   4  19  -3    3.00   27.50
  -4 -19   3   41.40   33.90
   3  19  -3   29.90   29.80
  -3 -19   3   31.00   28.20
   2  19  -3   41.40   31.30
  -2 -19   3   13.60   26.50
   1  19  -3  -30.70   17.40
  -1 -19   3  -31.20   18.20
   0  19  -3  -50.59   22.30
   0 -19   3    5.50   21.60
  -1  19  -3    9.00   27.60
  -1  19  -3   -4.40   27.80
  -2  19  -3   77.39   35.30
  -2  19  -3  -39.30   24.00
  -3  19  -3   26.10   32.40
  -3  19  -3   13.00   28.50
  -4  19  -3   31.10   37.80
  -5  19  -3  -14.60   33.70
  -6  19  -3    8.70   36.00
  12  18  -3   88.09   46.90
  12  18  -3   31.40   36.40
  11  18  -3  -38.60   37.80
  11  18  -3  -23.30   28.50
 -11 -18   3  -29.30   29.70
  10  18  -3   18.20   29.20
  10  18  -3   12.40   41.10
 -10 -18   3    6.60   31.90
   9  18  -3   -3.10   33.90
   9  18  -3  -19.90   25.60
  -9 -18   3  -24.60   29.80
   8  18  -3   31.60   35.30
   8  18  -3   15.40   27.70
  -8 -18   3  -12.80   28.50
   7  18  -3   85.79   38.50
  -7 -18   3  106.29   43.20
   6  18  -3   -8.60   27.60
  -6 -18   3   13.30   31.20
   5  18  -3   -9.10   26.70
  -5 -18   3   29.40   27.10
   4  18  -3   17.60   27.00
  -4 -18   3  -36.20   20.10
   3  18  -3   -8.50   22.60
  -3 -18   3   54.39   29.00
   2  18  -3   54.99   31.40
  -2 -18   3   19.80   25.40
   1  18  -3   73.79   35.60
  -1 -18   3  130.29   36.10
   0  18  -3   49.80   28.30
   0  18  -3   28.70   28.10
   0 -18   3   49.10   28.40
  -1  18  -3   56.29   31.00
  -1  18  -3   -1.50   23.60
   1 -18   3   49.99   27.90
  -2  18  -3   -1.40   28.20
  -2  18  -3    5.50   27.00
  -3  18  -3   19.20   30.40
  -3  18  -3  -31.40   23.50
  -4  18  -3   29.10   33.80
  -5  18  -3    0.90   34.10
  -6  18  -3  -33.20   32.00
  -7  18  -3    1.30   34.70
  12  17  -3   34.30   35.70
  12  17  -3   70.39   46.50
  11  17  -3   26.30   35.80
  11  17  -3   -2.90   37.90
 -11 -17   3  -29.10   32.80
  10  17  -3   52.09   41.90
  10  17  -3   21.50   36.50
 -10 -17   3   43.70   35.50
   9  17  -3   -4.40   31.50
   9  17  -3  -31.70   23.20
  -9 -17   3   -6.40   30.00
   8  17  -3    6.80   33.90
   8  17  -3   34.60   31.70
  -8 -17   3   -6.90   28.90
   7  17  -3   30.10   32.90
  -7 -17   3   64.09   34.10
   6  17  -3  147.39   40.30
  -6 -17   3   74.59   36.00
   5  17  -3    4.60   25.50
  -5 -17   3   51.49   31.20
   4  17  -3    3.20   25.40
  -4 -17   3  -12.30   23.50
   3  17  -3  -10.90   22.00
  -3 -17   3    5.30   25.00
   2  17  -3   29.50   25.20
  -2 -17   3   -0.80   22.90
   1  17  -3  116.09   31.60
   1  17  -3  164.28   40.90
  -1 -17   3  115.99   34.50
   0  17  -3   62.59   33.70
   0  17  -3   -2.50   20.40
   0 -17   3    0.00   20.60
  -1  17  -3    1.40   24.70
  -1  17  -3    8.60   22.40
   1 -17   3   18.70   23.60
  -2  17  -3  -42.90   21.10
  -2  17  -3  -22.40   22.40
   2 -17   3  -25.20   19.30
  -3  17  -3  -23.40   22.00
  -3  17  -3  -17.50   25.30
  -4  17  -3  -16.10   24.20
  -5  17  -3   11.20   31.70
  -6  17  -3   27.00   32.60
  -7  17  -3  -42.70   29.10
  -8  17  -3  -39.10   35.50
  13  16  -3   48.80   49.30
  12  16  -3   -9.40   31.70
  12  16  -3   25.90   40.60
  11  16  -3  -50.39   34.00
  11  16  -3   34.50   39.00
 -11 -16   3   17.20   42.30
  10  16  -3  -38.70   23.30
  10  16  -3   19.70   41.40
 -10 -16   3  -10.70   24.70
   9  16  -3  -18.50   25.80
   9  16  -3   32.60   37.50
  -9 -16   3    4.20   30.70
   8  16  -3  -34.20   28.50
   8  16  -3   -4.20   22.80
  -8 -16   3  -16.10   24.00
   7  16  -3   15.10   23.60
  -7 -16   3   -1.20   26.40
   6  16  -3   24.60   26.80
  -6 -16   3   14.20   26.30
   5  16  -3    5.50   21.10
  -5 -16   3   -6.50   21.00
   4  16  -3   12.40   24.90
  -4 -16   3   34.30   26.90
   3  16  -3   44.40   28.80
  -3 -16   3   26.40   25.10
   2  16  -3   -2.20   21.80
   2  16  -3   13.90   18.00
  -2 -16   3    9.50   21.30
   1  16  -3   88.69   31.00
   1  16  -3   35.20   22.20
  -1 -16   3  -31.70   20.40
   0  16  -3  -10.70   18.80
   0  16  -3  -26.10   18.10
   0 -16   3   32.80   21.50
  -1  16  -3   -5.90   24.70
  -1  16  -3   -5.90   22.10
   1 -16   3   26.70   22.00
  -2  16  -3   26.40   28.10
  -2  16  -3   12.40   26.40
   2 -16   3  -38.30   16.80
  -3  16  -3  -15.10   18.80
  -3  16  -3   10.20   27.40
   3 -16   3  -20.90   21.90
  -4  16  -3   76.09   39.10
  -4  16  -3   -1.90   20.50
  -5  16  -3   47.50   36.10
  -6  16  -3    9.40   32.40
  -7  16  -3  -17.80   34.20
  -8  16  -3  -44.30   29.10
  13  15  -3   53.59   43.40
  12  15  -3  -43.40   29.20
  12  15  -3  -45.50   25.50
  11  15  -3  -10.00   36.40
  11  15  -3   39.80   32.20
 -11 -15   3  -18.80   35.00
  10  15  -3   29.60   30.20
  10  15  -3   56.99   38.20
 -10 -15   3   45.60   34.40
   9  15  -3   35.40   34.00
   9  15  -3   -0.10   23.80
  -9 -15   3  -12.30   26.10
   8  15  -3   83.59   38.90
   8  15  -3   18.10   26.70
  -8 -15   3   42.10   29.90
   7  15  -3   -7.40   23.00
  -7 -15   3  -30.00   19.70
   6  15  -3   25.60   25.50
  -6 -15   3   32.00   26.20
   5  15  -3   -5.30   22.70
  -5 -15   3  -32.30   17.30
   4  15  -3   17.20   24.30
  -4 -15   3   22.90   24.30
   3  15  -3   44.80   28.70
  -3 -15   3   27.50   21.20
   2  15  -3  325.77   44.20
   2  15  -3  329.77   51.39
  -2 -15   3  382.16   52.99
   1  15  -3   48.40   25.30
   1  15  -3   38.70   21.90
  -1 -15   3   64.39   23.60
   0  15  -3   43.20   26.00
   0  15  -3   86.99   30.60
   0 -15   3   89.09   26.70
  -1  15  -3   28.30   24.30
  -1  15  -3   59.79   29.10
   1 -15   3  -21.40   20.30
  -2  15  -3   -8.40   21.80
  -2  15  -3  -27.10   19.10
   2 -15   3   18.90   20.20
  -3  15  -3  100.69   36.60
  -3  15  -3   48.90   29.70
   3 -15   3   55.39   29.30
  -4  15  -3   18.30   21.60
  -4  15  -3  -20.10   23.50
   4 -15   3   38.10   27.50
  -5  15  -3   23.20   29.90
  -6  15  -3   42.30   37.00
  -7  15  -3    5.00   30.80
  -8  15  -3   -3.50   36.00
  -9  15  -3   22.90   40.60
  13  14  -3   -6.80   35.80
  12  14  -3  -20.50   26.70
  12  14  -3  -51.69   30.90
  11  14  -3    9.50   36.30
  11  14  -3   -5.30   25.00
  10  14  -3  -16.20   26.20
  10  14  -3  -78.89   18.70
 -10 -14   3   30.20   32.10
   9  14  -3   62.29   37.70
   9  14  -3   36.10   28.20
  -9 -14   3  -18.60   25.20
   8  14  -3   44.80   29.20
   8  14  -3   -6.90   31.20
  -8 -14   3  -28.50   19.10
   7  14  -3   68.29   30.70
  -7 -14   3  -21.00   19.20
   6  14  -3   36.60   25.10
  -6 -14   3   33.80   27.70
   5  14  -3   32.40   26.10
  -5 -14   3   16.10   22.90
   4  14  -3    1.50   18.40
  -4 -14   3    5.00   18.50
   3  14  -3   55.29   25.30
   3  14  -3   77.99   19.80
  -3 -14   3   29.90   23.70
   2  14  -3   44.70   26.20
   2  14  -3   42.80   20.40
  -2 -14   3   70.99   26.70
   1  14  -3   38.80   19.20
   1  14  -3   12.40   20.00
  -1 -14   3   26.30   20.20
   0  14  -3   45.70   25.50
   0  14  -3   90.89   31.00
   0 -14   3   96.69   28.30
  -1  14  -3  -14.70   17.90
  -1  14  -3    4.50   21.70
   1 -14   3   15.50   21.20
  -2  14  -3   10.60   22.40
  -2  14  -3   12.90   22.60
   2 -14   3   33.80   21.90
  -3  14  -3   46.90   28.70
  -3  14  -3  -30.80   17.00
   3 -14   3   -6.10   23.00
  -4  14  -3  -12.80   23.10
  -4  14  -3   22.30   24.50
   4 -14   3   26.90   26.40
  -5  14  -3    8.10   27.10
   5 -14   3    5.90   24.60
  -6  14  -3   -9.20   25.80
  -7  14  -3   -8.10   26.80
  -8  14  -3   -8.40   28.50
  -9  14  -3   -0.60   38.00
 -10  14  -3  -36.70   29.50
  14  13  -3  -12.50   36.80
  13  13  -3   42.00   45.20
  12  13  -3  -48.40   23.70
  12  13  -3   11.80   35.90
  11  13  -3   21.50   31.30
  11  13  -3    1.70   25.00
  10  13  -3    0.90   25.10
  10  13  -3   34.20   35.00
 -10 -13   3    9.20   29.00
   9  13  -3    3.10   23.10
   9  13  -3   23.80   32.30
  -9 -13   3   44.90   30.30
   8  13  -3  233.18   52.49
   8  13  -3  279.47   53.59
  -8 -13   3  191.08   51.19
   7  13  -3   -1.70   20.70
  -7 -13   3  -26.60   17.80
   6  13  -3   16.20   21.80
  -6 -13   3  -21.60   16.20
   5  13  -3   -2.50   19.90
  -5 -13   3   -6.50   16.90
   4  13  -3   21.10   21.00
  -4 -13   3   15.40   19.30
   3  13  -3   26.60   23.00
   3  13  -3   52.19   15.30
  -3 -13   3   -1.00   18.00
   2  13  -3  160.08   38.60
   2  13  -3  186.88   29.80
  -2 -13   3  227.58   40.10
   1  13  -3   34.00   18.80
   1  13  -3   59.29   25.10
  -1 -13   3   13.80   19.30
   0  13  -3   69.59   27.30
   0  13  -3   29.30   19.50
   0 -13   3   54.49   22.30
  -1  13  -3   10.30   18.50
  -1  13  -3   21.00   19.10
   1 -13   3  -21.50   14.40
  -2  13  -3    4.90   21.70
  -2  13  -3   -3.90   20.00
   2 -13   3   42.00   20.90
  -3  13  -3   39.40   28.80
  -3  13  -3   24.30   20.00
   3 -13   3   43.60   21.70
  -4  13  -3   42.70   19.80
  -4  13  -3   24.70   27.70
   4 -13   3   -8.20   25.80
  -5  13  -3   16.30   25.70
   5 -13   3   53.49   30.50
  -6  13  -3   -9.20   30.20
   6 -13   3   16.30   28.20
  -7  13  -3   27.40   37.80
  -8  13  -3  -49.90   26.20
  -9  13  -3    8.00   36.90
 -10  13  -3   32.90   42.10
  14  12  -3   36.40   43.80
  13  12  -3  -16.60   33.80
  12  12  -3   48.10   38.60
  11  12  -3   16.60   27.30
  11  12  -3  -15.20   26.50
  10  12  -3   -8.20   27.10
  10  12  -3   -4.20   23.30
 -10 -12   3   -1.10   27.40
   9  12  -3  252.57   57.79
   9  12  -3  190.18   42.00
  -9 -12   3  124.99   41.60
   8  12  -3   38.80   27.10
   8  12  -3   70.49   34.10
  -8 -12   3   30.20   26.00
   7  12  -3   86.29   29.40
  -7 -12   3   88.79   32.00
   6  12  -3   14.90   22.00
  -6 -12   3   35.60   23.20
   5  12  -3   11.00   17.30
  -5 -12   3  -10.40   16.60
   4  12  -3   49.30   24.10
   4  12  -3  129.99   16.80
  -4 -12   3  112.59   31.30
   3  12  -3   -1.00   19.60
   3  12  -3   20.00   11.80
  -3 -12   3   47.60   20.70
   2  12  -3   44.10   16.10
   2  12  -3   55.79   25.20
  -2 -12   3   47.10   21.30
   1  12  -3   38.70   21.90
   1  12  -3   89.39   21.80
  -1 -12   3   85.49   24.10
   0  12  -3   15.50   16.40
   0  12  -3   10.30   19.80
   0 -12   3   93.89   24.00
  -1  12  -3  152.08   33.50
  -1  12  -3  176.28   34.10
   1 -12   3  150.68   33.80
  -2  12  -3   25.30   19.50
  -2  12  -3   41.90   25.50
   2 -12   3   71.49   24.20
  -3  12  -3   50.69   26.10
  -3  12  -3   20.90   19.90
   3 -12   3   67.39   25.20
  -4  12  -3   20.40   17.40
  -4  12  -3   -7.30   22.20
   4 -12   3    9.20   18.60
  -5  12  -3    2.20   23.30
  -5  12  -3   30.10   18.50
   5 -12   3   43.60   27.70
  -6  12  -3  -27.50   18.40
   6 -12   3   10.00   26.20
  -7  12  -3   -5.50   24.60
   7 -12   3   -7.70   28.60
  -8  12  -3   79.39   40.60
  -9  12  -3  -40.30   30.30
 -10  12  -3   45.60   38.80
 -11  12  -3   22.90   46.60
  14  11  -3    5.70   40.80
  13  11  -3   -1.50   32.20
  12  11  -3   51.19   39.30
  11  11  -3  -33.70   22.90
  11  11  -3  -10.00   22.90
  10  11  -3  -25.70   22.30
  10  11  -3   -9.00   23.40
 -10 -11   3  -49.50   24.40
   9  11  -3   -4.80   21.20
   9  11  -3    4.10   25.10
  -9 -11   3   28.20   25.90
   8  11  -3   41.20   28.40
   8  11  -3   59.29   32.60
  -8 -11   3   48.30   28.30
   7  11  -3   10.90   27.90
   7  11  -3   19.70   20.80
  -7 -11   3    2.20   21.30
   6  11  -3  -19.80   16.60
  -6 -11   3   -2.10   19.60
   5  11  -3   -9.80   16.60
  -5 -11   3  -27.50   15.40
   4  11  -3  116.19   28.40
   4  11  -3  115.59   15.30
  -4 -11   3  112.49   16.70
  -4 -11   3  162.28   33.00
   3  11  -3  205.48   40.40
   3  11  -3  269.47   29.00
  -3 -11   3  227.28   42.10
   2  11  -3   71.09   17.20
   2  11  -3   -1.60   16.80
  -2 -11   3   16.80   16.50
   1  11  -3  405.46   46.00
   1  11  -3  348.37   50.59
  -1 -11   3  443.86   50.19
   0  11  -3  207.08   32.80
   0  11  -3  209.08   36.30
   0 -11   3  216.58   35.20
  -1  11  -3   29.40   18.90
  -1  11  -3   25.30   18.80
   1 -11   3   36.40   20.00
  -2  11  -3   60.19   21.70
  -2  11  -3   68.39   25.10
   2 -11   3  111.79   26.40
  -3  11  -3  232.18   38.00
  -3  11  -3  197.88   41.50
   3 -11   3  249.68   40.90
  -4  11  -3  582.94   61.49
  -4  11  -3  548.85   69.59
   4 -11   3  551.54   67.09
  -5  11  -3   25.50   24.60
  -5  11  -3   47.80   21.00
   5 -11   3   78.29   31.20
  -6  11  -3   16.70   25.60
   6 -11   3   -9.40   25.40
  -7  11  -3   51.79   33.60
   7 -11   3   32.00   32.30
  -8  11  -3   20.20   29.70
   8 -11   3  -51.69   24.50
  -9  11  -3   11.90   34.50
 -10  11  -3    0.90   31.80
 -11  11  -3    2.60   40.70
  14  10  -3   41.30   40.50
  13  10  -3   23.80   34.50
  12  10  -3   21.50   33.40
  11  10  -3   12.00   23.70
  11  10  -3  -17.40   27.20
  10  10  -3  -16.30   16.30
  10  10  -3  -11.10   25.30
   9  10  -3  189.78   46.00
   9  10  -3  187.28   42.20
  -9 -10   3  187.08   43.50
   8  10  -3    8.50   24.00
   8  10  -3   10.80   20.10
  -8 -10   3  -33.10   18.70
   7  10  -3   71.49   27.00
   7  10  -3  109.99   38.00
  -7 -10   3  102.59   32.20
   6  10  -3  423.56   55.19
  -6 -10   3  391.26   56.19
   5  10  -3   -5.30   16.80
  -5 -10   3    4.90   17.20
   4  10  -3  173.28   33.60
   4  10  -3  120.39   14.60
  -4 -10   3   88.69   26.70
  -4 -10   3  111.19   14.80
   3  10  -3   -1.80    9.10
   3  10  -3  -14.80   13.20
  -3 -10   3   -6.50   15.90
   2  10  -3   50.99   19.00
   2  10  -3   80.29   17.40
  -2 -10   3   39.90   19.30
   1  10  -3  950.60   85.59
   1  10  -3  865.41   89.59
  -1 -10   3  970.10   90.49
   0  10  -3  663.03   69.39
   0  10  -3  680.53   71.39
   0 -10   3  761.22   72.89
  -1  10  -3  158.98   31.00
  -1  10  -3   84.09   24.40
   1 -10   3  145.99   28.40
  -2  10  -3   26.90   16.70
  -2  10  -3    9.40   18.90
   2 -10   3   -1.60   14.80
  -3  10  -3   56.79   19.40
  -3  10  -3    7.40   16.70
   3 -10   3   22.40   18.30
  -4  10  -3   76.79   29.90
  -4  10  -3   99.29   22.30
   4 -10   3   -0.20   20.70
  -5  10  -3  233.98   33.50
  -5  10  -3  214.28   45.40
   5 -10   3  209.68   47.00
  -6  10  -3  -14.70   23.60
   6 -10   3    3.60   31.80
  -7  10  -3  -22.10   22.00
   7 -10   3   20.80   30.90
  -8  10  -3   60.39   34.00
   8 -10   3   -9.80   23.30
  -9  10  -3   -1.20   33.20
   9 -10   3   -2.50   33.00
 -10  10  -3  -61.59   26.20
 -11  10  -3   45.20   39.30
  14   9  -3  -31.60   30.90
  13   9  -3   -2.60   31.40
  12   9  -3  -20.00   26.40
  11   9  -3  -14.70   20.10
  11   9  -3   30.40   30.80
  10   9  -3    9.10   20.60
  10   9  -3   22.30   22.00
   9   9  -3  -32.50   15.90
   9   9  -3  -11.10   21.30
  -9  -9   3   -0.10   24.00
   8   9  -3   85.39   32.00
   8   9  -3   62.99   29.50
  -8  -9   3   69.99   29.60
   7   9  -3  149.79   33.40
   7   9  -3  199.18   45.60
  -7  -9   3  146.79   37.80
   6   9  -3  372.56   34.00
   6   9  -3  460.65   53.09
  -6  -9   3  358.96   53.59
   5   9  -3   53.89   22.60
  -5  -9   3   44.60   22.70
   4   9  -3  475.05   50.29
   4   9  -3  361.06   32.50
   4   9  -3  318.87   31.90
  -4  -9   3  376.46   32.40
  -4  -9   3  372.36   49.00
   3   9  -3  209.98   24.00
   3   9  -3  257.37   35.90
  -3  -9   3  188.98   38.10
   2   9  -3  151.58   23.20
   2   9  -3  160.48   30.90
  -2  -9   3  191.28   33.40
   1   9  -3   18.10   13.40
   1   9  -3   -6.90   12.10
  -1  -9   3  -23.80   16.10
   0   9  -3  449.06   45.40
   0   9  -3  334.87   46.00
   0  -9   3  350.86   47.10
  -1   9  -3  337.87   42.70
  -1   9  -3  381.96   43.60
   1  -9   3  345.07   44.00
  -2   9  -3  363.36   45.50
  -2   9  -3  454.75   52.09
   2  -9   3  417.26   51.59
  -3   9  -3  107.69   22.60
  -3   9  -3   71.39   26.60
   3  -9   3   81.29   26.00
  -4   9  -3  254.27   47.30
  -4   9  -3  295.57   35.80
   4  -9   3  246.08   46.50
  -5   9  -3  118.59   21.90
  -5   9  -3   87.99   31.10
   5  -9   3  143.99   37.90
  -6   9  -3   76.19   31.20
   6  -9   3   53.99   28.60
  -7   9  -3  -15.70   21.80
   7  -9   3   -3.20   20.00
  -8   9  -3  -19.90   21.50
   8  -9   3   15.00   24.00
  -9   9  -3  -13.80   29.20
   9  -9   3    1.90   24.40
 -10   9  -3   -3.60   34.60
 -11   9  -3   29.30   41.40
 -12   9  -3  -19.10   34.80
  14   8  -3   -2.10   35.50
  13   8  -3   13.60   33.00
  12   8  -3   60.39   36.30
  11   8  -3   33.10   25.50
  11   8  -3    7.10   28.00
  10   8  -3   15.80   27.40
  10   8  -3   27.00   22.80
   9   8  -3  188.58   38.20
   9   8  -3  169.08   45.00
  -9  -8   3  174.18   44.20
   8   8  -3   31.70   20.50
   8   8  -3   83.19   28.20
  -8  -8   3   58.99   27.20
   7   8  -3   86.49   26.30
   7   8  -3  113.39   34.70
   7   8  -3  149.79   21.20
  -7  -8   3   53.49   25.90
   6   8  -3    3.90   16.10
   6   8  -3    9.50    8.60
  -6  -8   3   24.50   20.00
   5   8  -3    0.00    7.30
   5   8  -3   -7.80    5.90
   5   8  -3  -13.60   14.00
  -5  -8   3    3.60   17.30
   4   8  -3   23.70    7.30
   4   8  -3   -0.30    5.50
   4   8  -3    9.30   16.80
  -4  -8   3   15.50   17.10
   3   8  -3 1007.90   99.99
   3   8  -3 1130.79   89.99
  -3  -8   3  997.70  101.39
   2   8  -3  234.98   36.70
   2   8  -3  274.47   28.10
  -2  -8   3  201.78   34.70
   1   8  -3   93.99   23.60
   1   8  -3   61.09   16.10
  -1  -8   3   36.00   16.70
   0   8  -3   59.79   18.80
   0   8  -3   46.40   16.70
   0  -8   3   29.40   16.40
  -1   8  -3  978.50   94.59
  -1   8  -3 1076.79   97.49
   1  -8   3 1088.09   99.79
  -2   8  -3  -16.90   14.70
  -2   8  -3   37.00   15.50
   2  -8   3   21.40   16.40
  -3   8  -3  260.17   32.10
  -3   8  -3  225.88   41.00
   3  -8   3  208.98   40.70
  -4   8  -3    3.80   12.70
  -4   8  -3  -13.80   15.60
   4  -8   3   -3.40   19.10
  -5   8  -3  429.46   41.80
  -5   8  -3  367.06   54.19
   5  -8   3  373.56   55.99
  -6   8  -3   10.30   24.30
  -6   8  -3   42.40   22.00
   6  -8   3   40.80   22.30
  -7   8  -3   49.40   28.50
   7  -8   3   41.10   27.10
  -8   8  -3  -50.89   17.80
   8  -8   3   35.80   25.40
  -9   8  -3   16.70   27.70
   9  -8   3  -10.70   21.90
 -10   8  -3   88.29   39.70
  10  -8   3   -5.70   23.90
 -11   8  -3   40.60   37.50
 -12   8  -3   -6.00   37.60
  14   7  -3   34.10   36.90
  13   7  -3   25.80   35.40
  12   7  -3   10.70   29.10
  11   7  -3   12.50   25.20
  10   7  -3   25.70   27.20
  10   7  -3   50.89   23.60
   9   7  -3  -33.30   16.70
   9   7  -3   11.10   16.00
  -9  -7   3   -2.10   13.90
   8   7  -3  331.17   37.50
   8   7  -3  360.46   56.09
   8   7  -3  300.97   45.30
  -8  -7   3  268.77   37.00
  -8  -7   3  436.76   57.29
   7   7  -3   21.30   17.50
   7   7  -3   21.70   21.30
   7   7  -3   17.60   11.60
  -7  -7   3   28.90   22.40
  -7  -7   3   20.00   11.80
   6   7  -3  361.26   54.09
   6   7  -3  640.04   66.09
   6   7  -3  531.25   47.00
  -6  -7   3  462.25   60.79
   5   7  -3 1326.47  120.89
   5   7  -3 1326.77  109.99
  -5  -7   3 1318.07  123.89
   4   7  -3  104.09   24.80
   4   7  -3   86.09   13.90
   4   7  -3  106.19   16.40
  -4  -7   3  114.59   27.20
   3   7  -3   38.70    9.10
   3   7  -3   11.10   15.70
  -3  -7   3   10.00    9.40
  -3  -7   3   27.70   17.90
   2   7  -3   -8.50    8.00
   2   7  -3   12.80   15.70
  -2  -7   3   30.90   16.30
   1   7  -3  609.04   59.59
   1   7  -3  527.55   54.39
  -1  -7   3  649.64   60.19
   0   7  -3  152.98   24.90
   0   7  -3  142.79   23.70
   0  -7   3   66.19   19.00
  -1   7  -3  202.98   31.70
  -1   7  -3  235.58   33.00
   1  -7   3  202.88   31.90
  -2   7  -3  343.87   38.00
  -2   7  -3  237.48   40.80
   2  -7   3  383.96   48.00
  -3   7  -3    4.40   14.70
  -3   7  -3   -4.40   10.90
   3  -7   3   18.60   20.20
  -4   7  -3   29.30   21.90
  -4   7  -3   22.40   12.60
   4  -7   3   51.59   21.00
  -5   7  -3   -3.20   19.10
  -5   7  -3   -4.70    8.60
   5  -7   3    3.10   15.10
  -6   7  -3  -10.10    8.00
  -6   7  -3  -11.50   18.50
   6  -7   3   -5.60   16.20
  -7   7  -3   96.09   35.60
   7  -7   3   21.60   20.80
  -8   7  -3   41.30   28.10
   8  -7   3   18.40   21.60
  -9   7  -3  -20.80   27.80
   9  -7   3   76.39   29.80
 -10   7  -3   -1.20   31.60
  10  -7   3   11.20   24.70
 -11   7  -3   16.40   27.60
  11  -7   3  -39.40   18.80
 -12   7  -3  -45.10   29.90
  14   6  -3    3.00   32.60
  13   6  -3    6.20   31.90
  12   6  -3  -25.20   23.40
  11   6  -3  -11.90   23.80
  10   6  -3  233.88   51.09
  10   6  -3  180.78   36.40
 -10  -6   3  170.08   40.40
   9   6  -3   -6.40   20.60
   9   6  -3   29.20   18.50
  -9  -6   3   19.50   17.40
   8   6  -3   11.90   16.20
   8   6  -3   15.30   22.10
  -8  -6   3   24.30   23.30
  -8  -6   3   -8.00   12.00
   7   6  -3  109.19   32.30
   7   6  -3  135.39   24.00
   7   6  -3  175.98   31.80
  -7  -6   3  174.68   38.40
  -7  -6   3  102.79   21.80
   6   6  -3  767.42   75.89
   6   6  -3  721.43   81.59
   6   6  -3  719.63   67.69
  -6  -6   3  812.92   68.69
  -6  -6   3  721.13   80.29
   5   6  -3  355.56   34.60
   5   6  -3  367.86   44.50
  -5  -6   3  306.57   45.60
   4   6  -3  240.38   25.50
   4   6  -3  238.58   34.20
  -4  -6   3  277.17   38.10
   3   6  -3  347.27   40.30
   3   6  -3  293.87   27.60
  -3  -6   3  289.47   28.70
  -3  -6   3  225.88   36.20
   2   6  -3  883.51   72.09
   2   6  -3  860.61   79.39
  -2  -6   3  752.82   78.69
   1   6  -3  268.47   28.30
   1   6  -3  207.98   30.50
  -1  -6   3  222.38   32.10
   0   6  -3  145.29   25.70
   0   6  -3  163.88   26.40
   0  -6   3  194.08   27.80
  -1   6  -3  280.67   34.00
  -1   6  -3  230.08   35.60
   1  -6   3  375.46   39.00
  -2   6  -3    4.90   13.70
  -2   6  -3    2.40   10.50
   2  -6   3    2.70   16.00
  -3   6  -3  167.18   33.20
  -3   6  -3  215.38   28.90
   3  -6   3  208.08   42.70
  -4   6  -3  124.59   19.60
  -4   6  -3  128.79   29.90
   4  -6   3  110.59   27.90
  -5   6  -3    2.30    7.90
  -5   6  -3   10.60   19.40
   5  -6   3   31.30   17.30
  -6   6  -3   -5.10   17.90
  -6   6  -3   40.80    9.80
   6  -6   3   25.50   19.70
  -7   6  -3   71.79   32.50
   7  -6   3  107.19   29.60
  -8   6  -3   18.30   29.10
   8  -6   3   35.90   26.30
  -9   6  -3   20.60   25.50
   9  -6   3   28.40   24.70
 -10   6  -3    4.80   29.90
  10  -6   3  -22.70   17.70
 -11   6  -3   27.60   31.10
  11  -6   3  -20.90   21.60
 -12   6  -3    7.40   34.20
  12  -6   3   -3.50   29.30
 -13   6  -3   -3.00   32.70
  14   5  -3   31.30   32.10
  13   5  -3   -8.60   29.50
  12   5  -3  -21.90   25.90
  11   5  -3   -3.70   21.50
  10   5  -3   11.70   17.20
  10   5  -3    2.20   23.10
 -10  -5   3   -0.20   16.60
   9   5  -3  121.89   36.40
   9   5  -3  157.08   32.00
  -9  -5   3  205.38   36.60
   8   5  -3   16.60   16.10
   8   5  -3   -1.40   17.40
  -8  -5   3  -24.50   11.70
   7   5  -3   69.69   27.10
   7   5  -3   87.09   24.10
  -7  -5   3   64.69   27.20
  -7  -5   3  157.58   25.30
   6   5  -3   18.40   16.40
   6   5  -3   11.90   17.80
  -6  -5   3   33.30   13.80
  -6  -5   3   -2.10   15.70
   5   5  -3  129.39   20.60
   5   5  -3  173.58   29.10
  -5  -5   3  114.09   19.80
  -5  -5   3  161.58   31.50
   4   5  -3  294.37   31.00
   4   5  -3  341.07   38.90
  -4  -5   3  316.47   42.30
   3   5  -3   61.69   19.60
   3   5  -3   37.70    9.60
  -3  -5   3   51.59   17.60
   2   5  -3 1528.95  126.09
   2   5  -3 1548.74  132.49
  -2  -5   3 1536.85  132.79
   1   5  -3  198.68   30.80
   1   5  -3  238.18   26.20
  -1  -5   3  213.68   30.20
   0   5  -3   69.79   17.50
   0   5  -3   65.29   17.80
   0  -5   3   83.69   19.10
  -1   5  -3  161.38   25.90
  -1   5  -3  246.38   31.10
   1  -5   3  229.28   30.10
  -2   5  -3  882.71   73.99
  -2   5  -3  787.82   79.09
   2  -5   3  840.62   82.39
  -3   5  -3  109.99   26.20
  -3   5  -3   84.39   15.30
   3  -5   3   75.89   21.60
  -4   5  -3    1.90    7.80
  -4   5  -3   28.20   19.20
   4  -5   3   26.90   17.80
  -5   5  -3   72.39   25.50
  -5   5  -3  152.68   15.50
   5  -5   3   97.89   24.90
   5  -5   3  102.29   18.30
  -6   5  -3   96.09   30.60
   6  -5   3  124.39   28.90
  -7   5  -3   19.00   24.10
   7  -5   3   97.39   26.70
  -8   5  -3  176.98   43.00
   8  -5   3  155.98   37.30
  -9   5  -3   -8.00   23.60
   9  -5   3   17.70   22.90
 -10   5  -3   11.60   32.40
  10  -5   3  -13.30   20.90
 -11   5  -3    0.80   27.50
  11  -5   3   13.60   26.40
 -12   5  -3    0.60   34.20
  12  -5   3   -9.80   22.90
 -13   5  -3    9.30   38.50
  13  -5   3   35.20   47.70
  14   4  -3  -10.40   33.90
  13   4  -3   67.99   38.40
  12   4  -3  107.09   40.40
  11   4  -3   18.10   29.60
 -11  -4   3   20.80   22.50
  10   4  -3   18.60   23.60
  10   4  -3   23.60   24.50
 -10  -4   3   21.20   19.00
   9   4  -3    4.30   16.10
   9   4  -3  -34.10   17.30
  -9  -4   3   -5.30   16.20
   8   4  -3  -15.80   12.40
   8   4  -3   24.80   22.90
  -8  -4   3   -9.90   13.90
   7   4  -3  166.78   32.20
   7   4  -3  258.57   41.60
  -7  -4   3  199.88   31.40
  -7  -4   3  240.88   45.60
   6   4  -3  -10.30    9.10
   6   4  -3   -5.80   15.00
  -6  -4   3    5.20   11.50
  -6  -4   3   21.40   17.30
   5   4  -3   56.49   18.70
   5   4  -3   84.09   25.40
  -5  -4   3   66.19   23.80
  -5  -4   3   77.39   16.70
   4   4  -3  328.57   31.40
   4   4  -3  248.08   35.60
  -4  -4   3  284.07   39.80
  -4  -4   3  291.87   31.00
   3   4  -3  200.38   30.70
   3   4  -3  267.97   26.00
  -3  -4   3  253.37   34.20
   2   4  -3  511.05   52.59
   2   4  -3  531.25   47.30
  -2  -4   3  548.65   49.20
  -2  -4   3  556.94   53.69
   1   4  -3 2031.40  170.98
   1   4  -3 2006.80  168.08
  -1  -4   3 2155.48  171.88
   0   4  -3  335.27   38.80
   0   4  -3  378.96   38.70
   0  -4   3  384.26   40.80
  -1   4  -3  180.58   26.30
  -1   4  -3  179.78   23.30
   1  -4   3  163.98   28.50
  -2   4  -3   -0.80    9.00
  -2   4  -3   31.20   15.10
   2  -4   3   -9.00   11.20
  -3   4  -3   30.70   15.70
  -3   4  -3   30.50    9.60
   3  -4   3   58.19   17.40
  -4   4  -3  240.78   27.80
  -4   4  -3  244.08   41.10
   4  -4   3  299.17   26.20
   4  -4   3  253.17   37.40
  -5   4  -3  185.88   37.80
   5  -4   3  232.78   36.60
  -6   4  -3   11.50   19.30
   6  -4   3   15.10   16.50
  -7   4  -3  150.68   34.90
   7  -4   3   86.09   27.80
  -8   4  -3  -20.60   20.00
   8  -4   3   -2.80   17.70
  -9   4  -3   60.79   33.90
   9  -4   3   74.29   29.20
 -10   4  -3    8.20   27.40
  10  -4   3   33.30   26.20
 -11   4  -3   -4.40   29.00
  11  -4   3   -9.50   25.00
 -12   4  -3  -12.10   29.80
  12  -4   3   -4.00   24.70
 -13   4  -3   39.70   37.20
  13  -4   3    6.30   33.00
  14   3  -3   -8.60   33.30
  13   3  -3   25.60   34.10
  12   3  -3  -20.90   24.80
 -12  -3   3   -2.20   25.20
  11   3  -3   91.79   35.80
 -11  -3   3  -11.30   20.90
  10   3  -3  -15.10   20.90
 -10  -3   3   30.00   22.40
   9   3  -3   -5.50   18.50
   9   3  -3    3.70   16.80
  -9  -3   3   12.20   16.80
   8   3  -3   17.00   15.10
   8   3  -3   10.00   19.30
  -8  -3   3    1.70   16.30
   7   3  -3  213.18   39.10
   7   3  -3  152.18   29.30
  -7  -3   3  150.48   29.50
   6   3  -3  143.69   26.60
   6   3  -3  236.78   36.10
  -6  -3   3  167.88   28.60
  -6  -3   3  175.78   35.00
   5   3  -3  190.28   26.20
   5   3  -3  136.89   29.00
  -5  -3   3  171.68   30.70
  -5  -3   3  161.58   24.80
   4   3  -3    3.10   11.20
  -4  -3   3   -0.80    9.70
  -4  -3   3   11.00   14.50
   3   3  -3 1446.56  117.69
   3   3  -3 1316.67  121.09
  -3  -3   3 1392.16  117.59
  -3  -3   3 1488.85  123.19
   2   3  -3 1090.29   97.29
   2   3  -3 1150.48   92.89
  -2  -3   3 1086.89   97.29
   1   3  -3 1322.57  113.09
   1   3  -3 1414.66  110.59
  -1  -3   3 1250.97  112.99
   0   3  -3  273.77   32.40
   0   3  -3  366.96   34.30
   0  -3   3  334.07   35.20
  -1   3  -3  475.35   45.40
  -1   3  -3  471.55   42.60
   1  -3   3  390.56   48.30
  -2   3  -3 2194.38  187.18
  -2   3  -3 2351.66  180.98
   2  -3   3 2148.58  180.88
   2  -3   3 2230.98  186.28
  -3   3  -3   -7.10    5.80
  -3   3  -3   -6.90   12.80
   3  -3   3    0.60    5.80
   3  -3   3   15.90   13.40
  -4   3  -3    4.10   16.80
   4  -3   3   46.00   17.20
  -5   3  -3  716.93   77.09
   5  -3   3  772.42   75.49
  -6   3  -3   31.50   22.90
   6  -3   3    7.80   16.90
  -7   3  -3    9.60   19.80
   7  -3   3   10.30   17.70
  -8   3  -3  457.15   61.89
   8  -3   3  438.46   60.79
  -9   3  -3   31.40   28.60
   9  -3   3  -14.30   19.10
 -10   3  -3    9.80   25.70
  10  -3   3   -3.60   22.60
 -11   3  -3  -15.80   23.70
  11  -3   3  -22.40   21.70
 -12   3  -3   32.20   35.90
  12  -3   3   23.20   30.00
 -13   3  -3   -6.10   33.40
  13  -3   3  -14.00   27.10
  14  -3   3    0.30   30.90
  14   2  -3  -22.40   34.20
  13   2  -3    2.90   29.40
  12   2  -3   33.00   29.30
 -12  -2   3   78.69   34.80
  11   2  -3   -4.60   23.50
 -11  -2   3   -8.90   21.20
  10   2  -3   53.49   30.70
 -10  -2   3   22.80   22.70
   9   2  -3   52.09   20.30
   9   2  -3   65.99   25.90
  -9  -2   3   51.79   25.40
   8   2  -3   41.50   17.00
   8   2  -3   14.80   19.40
  -8  -2   3   45.10   20.20
   7   2  -3   29.70   18.60
   7   2  -3   11.80   13.30
  -7  -2   3   37.40   18.40
   6   2  -3   57.59   22.00
   6   2  -3   57.99   17.00
  -6  -2   3   58.99   20.30
   5   2  -3    0.00   11.80
   5   2  -3  -10.80    9.00
  -5  -2   3   13.50   12.40
  -5  -2   3   14.00   14.90
   4   2  -3   -3.00    8.20
   4   2  -3   14.30   14.10
  -4  -2   3    9.10   14.00
  -4  -2   3    9.20   12.40
   3   2  -3    0.30    9.90
  -3  -2   3  -10.70    9.00
  -3  -2   3    0.50   12.90
   2   2  -3   76.59   13.40
   2   2  -3  113.09   18.80
  -2  -2   3   84.29   18.10
   1   2  -3  846.82   73.49
   1   2  -3  835.82   71.09
  -1  -2   3  820.22   71.39
  -1  -2   3  873.41   73.69
   0   2  -3  233.88   25.70
   0   2  -3  317.37   27.10
   0  -2   3  205.38   27.10
  -1   2  -3  898.41   88.99
  -1   2  -3 1098.49   86.89
   1  -2   3 1026.10   91.39
   1  -2   3 1118.49   86.79
  -2   2  -3 1016.50   78.49
  -2   2  -3  896.01   84.59
   2  -2   3 1023.50   85.39
   2  -2   3  890.21   78.29
  -3   2  -3   68.59   19.50
   3  -2   3   33.60   15.30
  -4   2  -3  347.17   42.30
   4  -2   3  347.57   42.10
  -5   2  -3   15.70   16.50
   5  -2   3   37.50   22.40
  -6   2  -3   54.89   24.10
   6  -2   3   76.59   24.60
  -7   2  -3   97.59   29.50
   7  -2   3  165.28   36.10
  -8   2  -3   -1.40   19.20
   8  -2   3  -16.80   16.60
  -9   2  -3  147.19   36.50
   9  -2   3   74.39   32.20
 -10   2  -3  261.27   55.19
  10  -2   3  203.58   47.70
 -11   2  -3   52.99   33.40
  11  -2   3   30.10   28.70
 -12   2  -3    0.70   29.80
  12  -2   3   -8.60   26.40
 -13   2  -3  -33.50   27.50
  13  -2   3  -25.90   26.50
 -14   2  -3   15.80   38.00
  14  -2   3   19.40   34.40
  14   1  -3  -30.60   27.60
  13   1  -3   10.40   36.50
 -13  -1   3    6.40   27.70
  12   1  -3  -33.20   23.00
 -12  -1   3   22.80   27.60
  11   1  -3   41.70   28.40
 -11  -1   3   86.19   32.60
  10   1  -3  259.47   55.69
 -10  -1   3  464.95   57.79
   9   1  -3   31.80   22.50
   9   1  -3   12.50   15.30
  -9  -1   3   22.00   20.70
   8   1  -3  -10.50   13.60
   8   1  -3   28.80   15.50
  -8  -1   3   -9.30   14.70
   7   1  -3    2.60   11.50
   7   1  -3   -5.50   12.90
  -7  -1   3   12.70   16.30
   6   1  -3   26.00   15.50
   6   1  -3    6.60   11.90
  -6  -1   3   47.90   18.50
   5   1  -3   31.30   16.30
   5   1  -3   48.50   14.10
  -5  -1   3   32.30   16.50
  -5  -1   3   46.90   19.90
   4   1  -3   18.40   11.10
   4   1  -3    8.60   12.40
  -4  -1   3   13.40   13.30
  -4  -1   3    5.30   14.70
   3   1  -3  162.58   23.20
  -3  -1   3  161.88   23.80
  -3  -1   3  162.28   25.90
   2   1  -3   19.40    9.60
  -2  -1   3   32.30   12.60
  -2  -1   3   17.10   11.00
   1   1  -3   25.10    8.50
  -1  -1   3   19.90   10.00
  -1  -1   3   31.80   10.20
   0   1  -3  495.85   44.50
   0  -1   3  542.15   45.50
   0  -1   3  463.05   46.20
  -1   1  -3  405.66   38.40
   1  -1   3  373.26   37.90
  -2   1  -3  166.08   15.90
  -2   1  -3  176.88   26.10
   2  -1   3  147.69   24.30
  -3   1  -3 1188.78  101.09
   3  -1   3 1101.19  101.19
  -4   1  -3  147.49   27.80
   4  -1   3  127.99   25.90
  -5   1  -3  347.07   44.40
   5  -1   3  326.87   43.60
  -6   1  -3  671.13   72.59
   6  -1   3  745.33   75.49
  -7   1  -3  141.49   32.90
   7  -1   3  173.78   35.80
  -8   1  -3   26.90   22.70
   8  -1   3   21.00   21.90
  -9   1  -3    0.60   24.90
   9  -1   3   -3.60   19.10
 -10   1  -3  147.09   40.60
  10  -1   3  236.08   50.89
 -11   1  -3   49.99   30.70
  11  -1   3   77.19   40.80
 -12   1  -3  -22.80   27.50
  12  -1   3  -11.10   25.60
 -13   1  -3  -23.40   29.80
  13  -1   3   12.20   31.10
 -14   1  -3  -26.40   28.00
  14  -1   3  -21.00   32.90
  14   0  -3  -39.40   28.80
  13   0  -3   18.80   30.40
 -13   0   3   29.20   33.60
  12   0  -3   11.00   28.20
 -12   0   3   12.40   29.00
  11   0  -3   32.40   29.40
 -11   0   3    8.50   23.10
  10   0  -3   59.89   29.40
 -10   0   3  119.49   36.00
   9   0  -3   87.29   29.00
  -9   0   3   74.39   28.40
   8   0  -3   49.80   23.90
   8   0  -3   60.59   19.80
  -8   0   3   36.10   23.90
   7   0  -3   23.50   15.10
   7   0  -3   -8.50   12.70
  -7   0   3    5.00   17.30
   6   0  -3  339.17   34.30
   6   0  -3  224.38   36.80
  -6   0   3  257.17   38.10
   5   0  -3   47.60   16.30
   5   0  -3   26.40   13.00
  -5   0   3   35.90   17.90
   4   0  -3  378.66   43.90
  -4   0   3  451.65   44.40
  -4   0   3  370.66   44.40
   3   0  -3   45.70   15.10
  -3   0   3   94.39   19.00
  -3   0   3   68.49   16.20
  -2   0   3 1067.39   85.19
  -2   0   3  909.01   83.39
   1   0  -3  766.72   67.09
   1   0  -3  792.62   68.39
  -1   0   3  834.22   67.69
  -1   0   3  817.72   68.49
   0   0  -3  370.76   36.60
   0   0  -3  389.66   35.30
   0   0   3  440.86   36.90
  -1   0  -3   -2.20    5.00
  -1   0  -3    4.20    9.20
   1   0   3    0.40    8.10
   1   0   3    5.20    5.60
  -2   0  -3   -0.30   11.40
  -2   0  -3   11.20    5.70
   2   0   3   11.70    5.20
   2   0   3    0.10   12.30
  -3   0  -3   13.90   13.10
   3   0   3   25.70   15.50
  -4   0  -3  300.97   39.70
   4   0   3  380.36   42.20
  -5   0  -3  775.82   73.89
   5   0   3  709.33   74.29
  -6   0  -3   73.09   23.30
   6   0   3   58.49   22.30
  -7   0  -3   54.19   22.60
   7   0   3   33.00   20.80
  -8   0  -3  -12.70   16.00
   8   0   3   14.60   19.90
  -9   0  -3   44.20   26.30
   9   0   3   46.10   28.60
 -10   0  -3  -30.60   19.30
  10   0   3  -15.10   21.60
 -11   0  -3   23.80   25.60
  11   0   3   37.40   30.80
 -12   0  -3   24.30   27.70
  12   0   3   55.19   36.60
 -13   0  -3  -17.30   30.10
  13   0   3   61.19   40.00
 -14   0  -3  -10.50   29.20
  14   0   3  -15.30   34.90
 -14   1   3   41.10   37.20
  13  -1  -3  -15.20   31.10
 -13   1   3  -33.50   26.50
  12  -1  -3   28.20   27.80
 -12   1   3    0.60   28.40
  11  -1  -3  -12.00   25.10
 -11   1   3   25.20   27.80
  10  -1  -3   44.00   26.90
 -10   1   3   53.79   30.20
   9  -1  -3   55.79   28.30
  -9   1   3   45.10   26.00
   8  -1  -3   86.39   20.30
   8  -1  -3   86.79   28.20
  -8   1   3   32.20   23.10
   7  -1  -3  186.18   27.50
   7  -1  -3  239.98   37.60
  -7   1   3  159.88   37.10
   6  -1  -3  345.87   44.70
  -6   1   3  428.86   49.70
   5  -1  -3  118.09   23.30
  -5   1   3   75.29   21.40
   4  -1  -3  316.27   37.70
  -4   1   3  335.57   40.50
   3  -1  -3 1159.18   88.49
  -3   1   3  885.11   88.39
  -3   1   3  955.40   87.29
   2  -1  -3  133.49   19.30
  -2   1   3   92.79   19.40
  -2   1   3   89.39   16.00
   1  -1  -3  366.66   34.90
   1  -1  -3  321.97   31.10
  -1   1   3  332.77   31.40
  -1   1   3  414.06   34.50
  -1   1   3  383.66   35.00
   0  -1  -3 3043.00  245.48
   0  -1  -3 3270.77  244.38
   0   1   3 2871.31  244.78
   0   1   3 2987.00  245.68
   0   1   3 3065.19  245.28
  -1  -1  -3   58.79   10.50
  -1  -1  -3   59.49   11.80
  -1  -1  -3   36.90   11.90
   1   1   3   61.59   12.10
   1   1   3   43.90   11.40
   1   1   3   66.39   10.50
  -2  -1  -3  120.39   15.70
  -2  -1  -3  160.58   20.40
   2   1   3  141.99   21.80
   2   1   3  136.19   16.10
  -3  -1  -3 2929.41  238.48
  -3  -1  -3 2976.00  243.28
   3   1   3 3029.40  238.58
   3   1   3 2970.80  245.58
  -4  -1  -3    0.50   12.00
  -4  -1  -3    7.30    6.30
   4   1   3    7.20   13.60
   4   1   3    7.20    5.70
  -5  -1  -3   36.50    8.90
  -5  -1  -3   30.70   16.30
   5   1   3   18.50   16.20
   5   1   3   45.60    8.60
  -6  -1  -3   78.09   22.80
   6   1   3   98.59   26.00
   6   1   3   76.19   11.80
  -7  -1  -3  366.86   51.39
   7   1   3  462.15   40.50
   7   1   3  568.84   62.19
  -8  -1  -3    9.80   16.80
   8   1   3   28.90   23.40
  -9  -1  -3   32.80   25.20
   9   1   3    1.30   21.50
 -10  -1  -3  -11.20   20.80
  10   1   3   -0.90   23.20
 -11  -1  -3   65.19   31.90
  11   1   3   46.20   32.30
 -12  -1  -3   40.60   32.10
  12   1   3   13.20   30.80
 -13  -1  -3    7.90   28.30
  13   1   3  -34.30   29.00
  14   1   3   -9.90   33.40
 -13   2   3   48.30   38.50
  12  -2  -3   -9.10   27.10
 -12   2   3   -3.50   30.00
  11  -2  -3   20.40   24.90
 -11   2   3    6.50   27.50
  10  -2  -3   41.30   28.60
 -10   2   3   77.89   29.90
   9  -2  -3   11.40   20.80
  -9   2   3  -21.80   15.20
   8  -2  -3   94.19   29.00
   8  -2  -3   71.29   19.20
  -8   2   3  116.59   34.40
   7  -2  -3  134.39   29.70
  -7   2   3  165.88   36.40
   6  -2  -3   17.50   14.00
  -6   2   3   19.40   16.30
   5  -2  -3   14.20   13.20
  -5   2   3   47.50   19.90
   4  -2  -3  266.57   31.30
  -4   2   3  194.98   32.00
   3  -2  -3   46.70   14.00
  -3   2   3   49.00   17.50
   2  -2  -3  917.61   77.09
   2  -2  -3  946.91   77.19
  -2   2   3  850.51   80.79
  -2   2   3  904.61   78.79
   1  -2  -3 2599.74  201.78
  -1   2   3 2608.74  201.88
  -1   2   3 2391.06  204.88
  -1   2   3 2428.36  206.28
   0  -2  -3  254.57   22.00
   0  -2  -3  210.38   25.50
   0   2   3  186.58   25.00
   0   2   3  265.17   21.80
   0   2   3  247.68   26.30
  -1  -2  -3   39.60   10.60
  -1  -2  -3   68.19   12.20
   1   2   3  109.49   14.20
   1   2   3   98.29   12.90
   1   2   3   37.60   10.80
  -2  -2  -3  407.06   34.20
   2   2   3  269.97   36.00
   2   2   3  354.26   33.30
  -3  -2  -3 2146.29  181.18
   3   2   3 2217.78  179.18
   3   2   3 2268.27  184.88
  -4  -2  -3  994.60   88.09
   4   2   3 1015.70   83.79
   4   2   3  968.10   91.99
  -5  -2  -3 1469.65  126.49
   5   2   3 1407.96  130.59
   5   2   3 1472.85  120.19
  -6  -2  -3  243.38   34.40
   6   2   3  269.97   26.30
   6   2   3  193.88   37.30
  -7  -2  -3  -13.80   12.00
   7   2   3  -22.70   14.70
   7   2   3   10.50    8.10
  -8  -2  -3   -2.50   16.70
   8   2   3  -15.20   18.60
   8   2   3    1.20    8.20
  -9  -2  -3   99.49   30.00
   9   2   3   57.39   28.30
 -10  -2  -3    1.20   21.00
  10   2   3  -24.00   22.20
 -11  -2  -3  106.29   35.90
  11   2   3  152.18   46.20
 -12  -2  -3   -1.70   26.50
  12   2   3   -4.10   28.60
 -13  -2  -3   28.40   29.90
  13   2   3  -25.70   30.30
  14   2   3  -17.00   33.40
 -13   3   3   18.90   33.50
  12  -3  -3   -2.20   40.70
 -12   3   3   48.70   36.30
  11  -3  -3   50.09   29.40
 -11   3   3   21.20   29.20
  10  -3  -3   31.20   25.10
 -10   3   3    8.70   26.20
   9  -3  -3   24.80   20.80
  -9   3   3   28.00   26.10
   8  -3  -3   74.39   20.00
   8  -3  -3   92.29   28.40
  -8   3   3   49.60   27.50
   7  -3  -3 1220.28  112.79
  -7   3   3 1146.89  115.49
   6  -3  -3  158.88   29.90
  -6   3   3  126.09   30.80
   5  -3  -3   -4.60   10.30
  -5   3   3  -14.30   13.40
   4  -3  -3    1.30   10.60
  -4   3   3  -19.80   12.40
   3  -3  -3  718.93   64.69
  -3   3   3  792.82   65.79
  -3   3   3  649.64   68.89
   2  -3  -3 1981.00  162.38
   2  -3  -3 1941.31  162.38
  -2   3   3 2034.90  168.38
  -2   3   3 2093.59  162.78
  -2   3   3 1963.50  165.08
  -1   3   3  580.64   54.39
  -1   3   3  609.94   55.59
   0  -3  -3   77.59    9.90
   0  -3  -3   63.39   13.10
   0   3   3   60.99    8.90
   0   3   3   52.19   13.10
   0   3   3   86.69    9.50
   0   3   3   23.40   12.50
  -1  -3  -3 1285.97  116.49
  -1  -3  -3 1509.35  116.49
   1   3   3 1482.35  118.09
   1   3   3 1484.15  116.39
   1   3   3 1350.46  116.59
  -2  -3  -3  135.09   17.60
   2   3   3  167.98   23.00
   2   3   3  107.59   16.90
   2   3   3  137.79   19.60
  -3  -3  -3   66.39   14.00
   3   3   3   62.49   18.50
   3   3   3   60.79   13.30
  -4  -3  -3    8.90   10.60
   4   3   3    8.60    8.70
   4   3   3   -0.60   13.00
  -5  -3  -3   -5.60   10.80
   5   3   3    2.30    7.20
   5   3   3    4.40   16.70
  -6  -3  -3  742.53   74.09
   6   3   3  816.12   82.09
   6   3   3  802.82   69.39
  -7  -3  -3    7.60   14.10
   7   3   3   -5.60    6.90
   7   3   3  -15.90   12.10
  -8  -3  -3   52.19   22.20
   8   3   3   39.60   22.50
   8   3   3   78.19   16.10
  -9  -3  -3   10.00   18.40
   9   3   3  -17.90   19.50
 -10  -3  -3   65.39   26.50
  10   3   3   32.00   29.90
 -11  -3  -3   95.29   32.70
  11   3   3  142.49   47.10
 -12  -3  -3   63.49   32.00
  12   3   3   46.70   32.80
  13   3   3  -17.70   28.80
  14   3   3   -0.40   37.50
 -13   4   3   -5.40   32.70
 -12   4   3    0.10   29.00
  11  -4  -3  -35.30   22.40
 -11   4   3   11.00   28.50
  10  -4  -3    7.60   23.80
 -10   4   3   -1.00   24.30
   9  -4  -3   24.90   20.30
  -9   4   3   29.60   27.00
   8  -4  -3   -6.70   16.50
  -8   4   3  -16.60   17.70
   7  -4  -3   -1.50   12.50
  -7   4   3    7.20   21.70
   6  -4  -3  312.57   38.40
  -6   4   3  217.08   41.70
   5  -4  -3  617.04   59.69
  -5   4   3  562.74   64.79
   4  -4  -3  353.76   40.10
  -4   4   3  419.46   47.20
  -4   4   3  390.46   40.50
   3  -4  -3   82.79   16.70
  -3   4   3  112.39   19.70
  -3   4   3  128.89   26.70
   2  -4  -3   99.59   15.20
  -2   4   3  134.69   20.70
  -2   4   3   97.89   24.10
  -2   4   3  125.29   15.90
  -1   4   3 2129.59  179.28
  -1   4   3 2174.88  177.68
   0  -4  -3  205.18   20.90
   0   4   3  205.58   27.30
   0   4   3  266.57   21.70
   0   4   3  209.78   29.20
   0   4   3  217.38   20.60
  -1  -4  -3 8513.35  719.63
   1   4   3 9999.00  720.43
   1   4   3 8702.13  721.83
   1   4   3 8897.81  721.63
  -2  -4  -3    7.50    8.10
   2   4   3   13.30   12.10
   2   4   3   -7.40    7.10
   2   4   3    1.90   11.60
  -3  -4  -3  681.93   58.69
   3   4   3  695.93   61.69
   3   4   3  645.24   64.79
  -4  -4  -3 1597.14  125.59
   4   4   3 1422.76  131.59
   4   4   3 1453.25  126.19
  -5  -4  -3   47.80   15.40
   5   4   3   80.69   15.90
   5   4   3   11.00   17.90
  -6  -4  -3  459.65   45.50
   6   4   3  380.96   41.50
   6   4   3  423.96   52.19
  -7  -4  -3  124.99   26.00
   7   4   3  207.88   39.70
   7   4   3  130.19   21.60
  -8  -4  -3   59.99   22.30
   8   4   3   70.99   26.70
   8   4   3   63.29   15.90
  -9  -4  -3   16.20   16.60
   9   4   3    4.00   22.30
 -10  -4  -3   24.20   20.60
  10   4   3  -17.90   21.20
 -11  -4  -3   -8.00   20.40
  11   4   3  -38.00   21.70
 -12  -4  -3    2.30   33.50
  12   4   3   36.80   36.00
  13   4   3    0.70   28.60
  14   4   3  -25.80   27.50
 -13   5   3    4.40   36.00
 -12   5   3   -5.40   30.50
 -11   5   3    5.10   28.00
  10  -5  -3   22.00   23.40
 -10   5   3   85.09   36.70
   9  -5  -3   13.70   22.40
  -9   5   3  -16.90   22.00
   8  -5  -3   12.40   17.80
  -8   5   3  -11.20   20.50
   7  -5  -3  444.66   54.39
  -7   5   3  474.75   61.09
   6  -5  -3  265.57   37.20
  -6   5   3  247.88   43.80
   5  -5  -3   53.89   17.20
  -5   5   3   52.89   22.20
  -5   5   3   66.49   16.50
   4  -5  -3   14.50   11.20
  -4   5   3   13.70   12.90
  -4   5   3   25.80   18.10
   3  -5  -3  518.55   49.20
  -3   5   3  528.05   58.19
  -3   5   3  580.94   53.09
   2  -5  -3 1042.00   86.49
  -2   5   3 1002.00   90.99
  -2   5   3 1084.49   95.39
  -2   5   3 1037.10   86.49
   1  -5  -3 2261.67  183.28
  -1   5   3 2274.77  190.98
  -1   5   3 2364.96  189.58
  -1   5   3 2277.67  183.28
   0  -5  -3  206.38   20.00
   0   5   3  189.68   26.10
   0   5   3  189.78   26.40
   0   5   3  174.78   19.10
  -1  -5  -3   18.30   10.80
  -1  -5  -3   18.20   11.30
   1   5   3   18.10   14.10
   1   5   3   14.60   10.50
   1   5   3   64.29   13.80
  -2  -5  -3   72.69   11.80
  -2  -5  -3   73.19   12.10
  -2  -5  -3   61.99   15.70
   2   5   3   25.00   14.00
   2   5   3   57.59   11.10
   2   5   3   24.80   14.30
  -3  -5  -3   14.50    7.70
   3   5   3   -8.00    6.90
   3   5   3   16.70   12.50
   3   5   3   -6.70   12.60
  -4  -5  -3  165.78   20.70
   4   5   3  180.98   25.20
   4   5   3  154.98   30.50
  -5  -5  -3  507.55   49.00
   5   5   3  581.04   60.19
   5   5   3  493.35   51.09
  -6  -5  -3  128.89   23.10
   6   5   3  166.68   33.20
   6   5   3  148.69   24.30
  -7  -5  -3    8.20   12.60
   7   5   3   -7.80   15.30
   7   5   3   -2.40   10.10
  -8  -5  -3  105.49   26.00
   8   5   3  124.99   23.50
   8   5   3  132.19   37.90
  -9  -5  -3    8.70   17.80
   9   5   3   18.60   14.50
   9   5   3    6.00   22.60
 -10  -5  -3   80.59   27.00
  10   5   3  127.79   37.80
 -11  -5  -3   41.70   27.70
  11   5   3   12.30   30.90
  12   5   3  -19.90   26.80
  13   5   3   -4.70   33.70
  14   5   3    7.10   33.00
 -13   6   3    8.30   37.00
 -12   6   3   44.00   40.70
 -11   6   3   41.30   34.20
 -10   6   3   -7.00   25.30
   9  -6  -3    7.50   20.80
  -9   6   3   32.60   27.70
   8  -6  -3  -16.80   15.40
  -8   6   3   11.30   21.90
   7  -6  -3   11.10   17.00
  -7   6   3   11.60   24.50
   6  -6  -3  186.48   31.20
  -6   6   3  151.18   36.70
   5  -6  -3   -4.80    9.20
  -5   6   3    8.10   11.40
  -5   6   3   -9.80   18.50
   4  -6  -3  168.18   24.80
  -4   6   3  205.98   36.60
  -4   6   3  193.88   28.30
   3  -6  -3  255.07   27.90
  -3   6   3  216.48   36.30
  -3   6   3  195.88   32.30
   2  -6  -3   18.70    9.90
  -2   6   3    5.50   16.40
  -2   6   3  -10.80   11.20
  -2   6   3   -1.30    8.30
   1  -6  -3    6.50    6.30
  -1   6   3    2.10    6.60
  -1   6   3   11.40   12.70
  -1   6   3    3.20   13.50
   0  -6  -3   46.50   10.20
   0   6   3   53.19   10.00
   0   6   3  105.59   21.30
   0   6   3   17.40   13.30
  -1  -6  -3   39.70   11.10
   1   6   3   -3.00   12.00
   1   6   3  -10.10    9.10
  -2  -6  -3  486.15   44.90
  -2  -6  -3  513.75   49.70
   2   6   3  528.25   51.09
   2   6   3  497.95   50.99
  -3  -6  -3  305.57   28.20
  -3  -6  -3  330.37   37.90
   3   6   3  272.27   27.60
   3   6   3  325.67   36.70
   3   6   3  291.47   37.70
  -4  -6  -3   62.59   11.50
   4   6   3   66.79   20.20
   4   6   3   61.59   18.00
   4   6   3   50.19   11.00
  -5  -6  -3   35.00   10.70
   5   6   3   25.70   13.80
   5   6   3   19.50   17.50
  -6  -6  -3   31.10   12.20
   6   6   3   77.69   19.30
   6   6   3   89.29   25.10
  -7  -6  -3   21.80   12.80
   7   6   3   -4.90   11.00
   7   6   3    9.00   16.90
  -8  -6  -3   10.10   16.00
   8   6   3  -12.60   18.10
   8   6   3   -1.80   12.20
  -9  -6  -3   10.90   15.60
   9   6   3    1.10   13.90
   9   6   3    9.00   24.30
 -10  -6  -3    2.90   16.40
  10   6   3  -37.80   17.00
  11   6   3  -18.50   21.20
  12   6   3   22.10   33.00
  13   6   3  -29.10   29.20
  14   6   3   -7.40   40.40
 -12   7   3  -40.00   31.90
 -11   7   3   -4.20   31.10
 -10   7   3   25.80   31.60
  -9   7   3   -3.90   25.90
   8  -7  -3    2.90   16.80
  -8   7   3   13.50   26.80
   7  -7  -3  -14.30   12.50
  -7   7   3   22.40   24.20
   6  -7  -3   76.89   21.10
  -6   7   3   79.29   30.60
  -6   7   3  137.29   24.50
   5  -7  -3   31.70   14.30
  -5   7   3    3.70   20.80
  -5   7   3    1.10   11.80
   4  -7  -3   95.19   18.10
  -4   7   3   82.09   20.20
  -4   7   3   61.39   23.50
   3  -7  -3  325.67   32.60
  -3   7   3  205.08   37.90
  -3   7   3  237.18   34.20
   2  -7  -3  149.99   21.00
  -2   7   3  235.38   35.20
  -2   7   3  157.98   27.60
   1  -7  -3  983.60   82.39
  -1   7   3 1012.50   82.89
  -1   7   3  954.40   89.89
  -1   7   3  964.10   89.49
   0  -7  -3   34.10   10.40
   0   7   3   50.39   17.20
   0   7   3   59.69   17.40
  -1  -7  -3   19.10   11.30
   1   7   3   10.10   11.10
   1   7   3   26.00   14.90
  -2  -7  -3  411.96   38.60
  -2  -7  -3  399.36   43.20
   2   7   3  393.96   38.40
   2   7   3  454.75   45.50
   2   7   3  397.56   46.10
  -3  -7  -3    5.90   13.60
  -3  -7  -3   -1.70    6.80
  -3  -7  -3    2.10    6.70
   3   7   3   35.30   16.40
   3   7   3   -6.00   13.80
  -4  -7  -3    1.20    6.70
  -4  -7  -3  -24.40   11.90
   4   7   3    3.30    6.00
   4   7   3   27.10   15.40
   4   7   3   -0.30   14.60
  -5  -7  -3   70.09   12.20
   5   7   3   58.19   21.50
   5   7   3   27.50   16.50
  -6  -7  -3   26.20   10.40
   6   7   3   26.20   21.10
   6   7   3   52.09   18.00
  -7  -7  -3   29.40   13.10
   7   7   3   19.60   20.60
   7   7   3    1.60   12.50
  -8  -7  -3  101.19   22.50
   8   7   3  126.09   35.30
   8   7   3  131.19   27.10
  -9  -7  -3  129.99   27.90
   9   7   3  161.88   31.00
   9   7   3  211.58   46.80
  10   7   3  440.26   69.79
  11   7   3   -0.40   26.30
  12   7   3   19.90   29.90
  13   7   3  -31.20   33.40
  14   7   3   -7.00   34.40
 -12   8   3  -47.30   29.30
 -11   8   3    4.70   30.10
 -10   8   3   19.40   34.20
  -9   8   3    1.80   26.00
  -8   8   3   -1.60   25.20
   7  -8  -3    3.40   16.80
  -7   8   3   21.90   26.10
   6  -8  -3  -15.50   11.30
  -6   8   3    5.30   13.60
  -6   8   3   -1.30   19.50
   5  -8  -3  -25.90   11.00
  -5   8   3  -10.90   15.60
  -5   8   3    6.00   12.60
   4  -8  -3    7.70   12.00
  -4   8   3   19.30   14.00
  -4   8   3    7.60   17.50
   3  -8  -3  147.29   26.60
  -3   8   3  228.48   33.40
  -3   8   3   77.89   22.60
   2  -8  -3  439.16   45.40
  -2   8   3  420.46   48.90
  -2   8   3  476.25   51.69
   1  -8  -3  562.44   49.10
  -1   8   3  520.25   56.09
  -1   8   3  520.05   57.29
   0  -8  -3  255.37   27.70
   0   8   3  219.38   31.70
   0   8   3  255.17   35.40
  -1  -8  -3   69.89   16.20
   1   8   3   38.90   18.30
   1   8   3   77.09   17.60
  -2  -8  -3   -6.50   11.30
  -2  -8  -3    1.90    9.40
   2   8   3    5.70    8.90
   2   8   3   -3.70   13.90
  -3  -8  -3  123.79   24.40
  -3  -8  -3  102.29   15.20
  -3  -8  -3  113.09   14.90
   3   8   3   94.09   23.80
   3   8   3  112.19   25.50
  -4  -8  -3   -0.20   12.30
  -4  -8  -3   -1.00    5.00
  -4  -8  -3  -11.50    6.20
   4   8   3   15.80   17.60
   4   8   3    8.20   16.30
  -5  -8  -3   27.10    7.10
   5   8   3   -2.50   16.60
   5   8   3   23.70    7.30
   5   8   3   24.30   15.30
  -6  -8  -3  118.29   16.30
   6   8   3  111.29   25.30
   6   8   3  100.49   28.90
  -7  -8  -3    4.20    9.60
   7   8   3  -18.90   12.10
   7   8   3   -6.20   19.10
  -8  -8  -3   19.00   12.90
   8   8   3    7.80   22.10
   8   8   3    3.60   15.20
   9   8   3  -13.20   15.00
   9   8   3   13.10   22.10
  10   8   3   12.50   20.10
  10   8   3   21.00   27.50
  11   8   3  -16.10   23.40
  12   8   3    8.50   31.60
  13   8   3   21.30   37.20
  14   8   3   53.39   41.90
 -12   9   3  -37.60   29.70
 -11   9   3    7.30   35.70
 -10   9   3   -3.60   29.00
  -9   9   3   71.09   34.40
  -8   9   3  100.89   36.60
  -7   9   3   46.50   29.70
   6  -9  -3   38.00   19.50
  -6   9   3   33.20   16.90
  -6   9   3   65.59   28.60
   5  -9  -3   85.69   21.90
  -5   9   3   63.89   28.50
  -5   9   3   24.60   16.20
   4  -9  -3    3.70   16.00
  -4   9   3  -22.80   13.00
  -4   9   3    2.30   14.70
   3  -9  -3  411.46   38.70
  -3   9   3  299.17   47.10
  -3   9   3  282.87   40.80
   2  -9  -3   84.59   17.50
  -2   9   3  112.49   26.60
  -2   9   3   52.19   21.70
   1  -9  -3  292.57   31.10
  -1   9   3  268.47   38.70
  -1   9   3  316.87   39.90
   0  -9  -3   -0.30   11.50
   0   9   3   87.99   25.30
   0   9   3   19.90   15.30
  -1  -9  -3   10.70   11.30
   1   9   3  -11.10   14.60
   1   9   3   42.70   15.10
  -2  -9  -3  -15.10    8.80
  -2  -9  -3   -6.30   10.50
   2   9   3  -13.40    8.00
   2   9   3   -3.80   14.50
  -3  -9  -3   -8.30   12.60
  -3  -9  -3   19.40    9.30
   3   9   3   -6.70   14.40
   3   9   3   51.09   22.90
  -4  -9  -3   73.29    9.80
  -4  -9  -3   53.29   20.30
   4   9   3   87.09   24.40
   4   9   3   65.09   22.80
  -5  -9  -3  -12.50   14.00
   5   9   3   23.70   17.50
   5   9   3   12.90   18.10
   6   9   3   14.50   16.50
   6   9   3  -20.10   15.00
  -7  -9  -3  111.59   15.90
   7   9   3  117.49   27.40
   7   9   3   51.79   28.80
  -8  -9  -3   97.19   25.00
   8   9   3   33.10   20.40
   8   9   3   51.19   29.30
   9   9   3  273.27   52.99
   9   9   3  119.69   31.30
  10   9   3  111.19   29.10
  10   9   3   66.39   34.90
  11   9   3   83.89   37.80
  12   9   3   -1.20   33.00
  13   9   3    3.00   31.70
  14   9   3  -34.70   34.80
 -11  10   3   37.90   36.60
 -10  10   3   20.90   37.40
  -9  10   3  -34.10   27.90
  -8  10   3  192.78   47.50
  -7  10   3   38.00   31.70
  -6  10   3   42.00   20.80
  -6  10   3   59.09   31.70
   5 -10  -3   11.20   20.40
  -5  10   3   15.30   20.50
  -5  10   3   23.40   16.70
   4 -10  -3  -23.50   11.40
  -4  10   3    7.40   14.60
  -4  10   3    3.00   19.70
   3 -10  -3   22.10   12.50
  -3  10   3   53.29   19.80
  -3  10   3   49.90   22.20
   2 -10  -3  724.13   64.99
  -2  10   3  720.83   72.99
  -2  10   3  703.83   75.09
   1 -10  -3   31.90   12.10
  -1  10   3   42.50   19.50
  -1  10   3   61.59   22.20
   0 -10  -3   98.89   18.00
   0  10   3   54.69   20.70
   0  10   3  101.39   25.30
  -1 -10  -3  132.39   23.00
   1  10   3  109.99   27.60
   1  10   3  129.39   22.80
  -2 -10  -3  252.17   33.80
   2  10   3  247.48   29.60
   2  10   3  273.57   39.70
  -3 -10  -3   46.40   18.80
  -3 -10  -3   85.29   14.00
   3  10   3   78.89   25.90
   3  10   3   59.69   23.20
  -4 -10  -3  133.49   28.00
  -4 -10  -3   94.99   12.40
   4  10   3  143.79   31.30
   4  10   3  126.09   30.10
  -5 -10  -3  245.88   41.40
   5  10   3  132.69   32.90
   5  10   3  246.98   39.10
   6  10   3  108.29   30.90
   6  10   3   84.79   25.50
   7  10   3   16.60   22.70
   7  10   3   26.20   21.60
   8  10   3   19.00   19.70
   8  10   3   26.30   26.20
   9  10   3   -1.40   21.70
   9  10   3  -37.80   15.40
  10  10   3    0.40   22.20
  10  10   3   24.30   22.00
  11  10   3  144.69   44.40
  12  10   3    5.00   32.20
  13  10   3   44.30   39.30
  14  10   3   24.10   40.80
 -11  11   3  -14.40   31.20
 -10  11   3    3.60   37.50
  -9  11   3   21.60   34.30
  -8  11   3   13.10   27.80
  -7  11   3  -12.50   26.30
  -6  11   3   11.90   17.40
  -6  11   3   26.10   28.90
  -5  11   3  -10.00   16.60
  -5  11   3    1.90   21.70
   4 -11  -3   -8.30   11.10
  -4  11   3   11.00   23.30
  -4  11   3   -7.30   13.70
   3 -11  -3    0.40   11.40
  -3  11   3  -20.10   16.00
  -3  11   3    5.00   15.50
   2 -11  -3  138.39   21.90
  -2  11   3  144.19   31.00
  -2  11   3  175.08   36.40
   1 -11  -3   33.10   11.40
  -1  11   3    8.20   15.60
  -1  11   3    6.80   18.90
   0 -11  -3  172.48   26.50
   0  11   3  184.68   35.40
   0  11   3  225.38   32.50
  -1 -11  -3   73.69   18.60
   1  11   3  120.39   29.60
   1  11   3   85.79   20.70
  -2 -11  -3  207.18   30.40
   2  11   3  192.08   26.40
   2  11   3  178.48   37.00
  -3 -11  -3  209.88   32.20
  -3 -11  -3  184.08   23.10
   3  11   3  156.58   22.70
   3  11   3  206.58   35.50
  -4 -11  -3  252.27   25.50
  -4 -11  -3  350.16   41.80
  -4 -11  -3  275.67   25.50
   4  11   3  302.97   45.00
   4  11   3  212.68   39.60
  -5 -11  -3  407.86   54.59
   5  11   3  432.16   56.79
   5  11   3  503.75   57.29
  -6 -11  -3   94.39   28.60
   6  11   3   69.99   25.90
   6  11   3   87.09   31.50
   7  11   3   -5.00   19.70
   7  11   3   25.10   20.60
   8  11   3   94.79   34.40
   8  11   3  136.79   34.00
   9  11   3  358.76   64.99
   9  11   3  321.67   49.60
  10  11   3   90.19   29.30
  10  11   3   43.10   32.80
  11  11   3  -19.30   26.30
  12  11   3   36.00   37.60
  13  11   3    5.90   36.00
  14  11   3   60.19   42.00
 -11  12   3    4.50   31.30
 -10  12   3   49.99   45.70
  -9  12   3   -3.40   29.60
  -8  12   3   34.80   35.00
  -7  12   3  -20.10   25.80
  -6  12   3   -7.30   19.70
  -6  12   3    1.70   17.40
  -5  12   3  168.08   45.90
  -5  12   3  148.09   31.80
  -4  12   3   94.89   32.10
  -4  12   3   63.09   23.90
   3 -12  -3   32.70   13.30
  -3  12   3   22.40   18.40
  -3  12   3  -15.00   17.90
   2 -12  -3   81.09   17.20
  -2  12   3   60.29   24.40
  -2  12   3    6.10   19.10
   1 -12  -3  111.59   20.10
  -1  12   3   83.39   27.80
  -1  12   3  106.89   28.50
   0 -12  -3   24.80   13.80
   0  12   3   25.20   18.10
   0  12   3   46.70   20.70
  -1 -12  -3  301.47   39.00
   1  12   3  350.46   51.99
   1  12   3  339.67   39.80
  -2 -12  -3  435.86   48.70
   2  12   3  418.06   43.60
   2  12   3  367.06   51.59
  -3 -12  -3   29.10   19.30
  -3 -12  -3   41.10   12.40
   3  12   3   57.29   22.80
   3  12   3   13.40   11.00
  -4 -12  -3  714.03   83.99
  -4 -12  -3  908.11   74.29
  -4 -12  -3  788.52   71.09
   4  12   3 1062.09   90.59
   4  12   3  852.21   86.89
  -5 -12  -3  160.48   35.60
   5  12   3  197.58   39.50
   5  12   3  116.99   31.10
  -6 -12  -3   63.99   30.00
   6  12   3   89.79   28.80
   6  12   3  131.09   34.60
   7  12   3   42.20   27.00
   7  12   3  111.79   31.10
   8  12   3  -16.10   21.70
   8  12   3    0.10   20.50
   9  12   3  277.77   56.59
   9  12   3  262.57   48.70
  10  12   3   38.20   26.10
  10  12   3   55.39   33.40
  11  12   3   30.90   22.20
  11  12   3   14.00   35.20
  12  12   3   30.40   38.80
  13  12   3  -33.20   30.70
  14  12   3  -45.80   29.50
 -10  13   3   53.99   42.80
  -9  13   3   49.80   37.10
  -8  13   3   -3.30   30.70
  -7  13   3   21.10   28.40
  -6  13   3  -13.50   27.30
  -5  13   3   -0.20   18.00
  -5  13   3   -3.20   20.60
  -4  13   3   20.80   20.90
  -4  13   3   19.60   26.10
  -3  13   3   38.00   25.90
  -3  13   3   13.30   20.40
   2 -13  -3   17.60   12.30
  -2  13   3   -5.40   20.40
  -2  13   3   11.70   20.70
   1 -13  -3   91.89   19.90
  -1  13   3   99.19   28.90
  -1  13   3   56.79   27.10
   0 -13  -3   30.00   15.00
   0  13   3    7.10   16.60
   0  13   3   35.20   23.00
  -1 -13  -3  110.29   24.20
   1  13   3  120.99   25.80
   1  13   3   64.19   28.90
  -2 -13  -3   23.50   17.10
   2  13   3   41.60   15.60
   2  13   3    0.80   19.70
  -3 -13  -3  118.19   28.50
  -3 -13  -3  124.59   21.60
   3  13   3  110.49   33.70
   3  13   3  142.99   22.10
  -4 -13  -3   12.20   10.60
  -4 -13  -3   17.40   19.70
   4  13   3   42.80   24.60
   4  13   3   23.70   22.10
  -5 -13  -3    9.70   18.00
   5  13   3  -15.30   18.40
   5  13   3   85.79   29.20
  -6 -13  -3   78.99   31.40
   6  13   3  143.09   35.50
   6  13   3   99.59   33.80
  -7 -13  -3   39.30   28.40
   7  13   3  100.59   36.70
   7  13   3   69.29   29.00
   8  13   3    7.50   22.30
   8  13   3    1.50   26.00
   9  13   3   30.40   26.70
   9  13   3   28.20   32.00
  10  13   3   18.30   25.20
  10  13   3   56.79   36.40
  11  13   3  107.49   42.40
  11  13   3    0.90   23.70
  12  13   3  -10.90   32.90
  13  13   3  -13.40   39.30
  14  13   3   32.20   47.60
 -10  14   3   12.10   39.40
  -9  14   3  -23.70   34.30
  -8  14   3  -23.00   32.50
  -7  14   3   12.00   35.60
  -6  14   3    3.40   24.30
  -5  14   3  -18.50   26.80
  -5  14   3    2.10   18.20
  -4  14   3   44.00   26.10
  -4  14   3   19.40   24.70
  -3  14   3   96.59   35.40
  -3  14   3   77.59   30.60
  -2  14   3   82.49   30.90
  -2  14   3  116.89   31.50
   1 -14  -3   -4.30   11.10
  -1  14   3  -36.60   14.20
  -1  14   3    1.90   21.40
   0 -14  -3  198.08   32.10
   0  14   3  182.88   40.20
   0  14   3  267.97   40.30
  -1 -14  -3    5.90   14.60
   1  14   3   29.90   23.40
   1  14   3    4.40   16.00
  -2 -14  -3  490.15   57.19
   2  14   3  461.15   63.59
   2  14   3  566.84   55.39
  -3 -14  -3   58.39   16.60
  -3 -14  -3   18.10   18.50
   3  14   3   44.50   15.10
   3  14   3   85.99   29.60
  -4 -14  -3  226.38   25.90
  -4 -14  -3  234.48   42.20
   4  14   3  213.88   41.80
   4  14   3  227.08   44.00
  -5 -14  -3  178.58   38.00
   5  14   3  121.89   36.50
   5  14   3  283.97   47.60
  -6 -14  -3  189.58   42.20
   6  14   3  155.18   41.20
   6  14   3  286.47   51.39
  -7 -14  -3    9.80   24.50
   7  14   3   -4.10   21.30
   7  14   3   58.79   32.50
   8  14   3   58.49   30.50
   8  14   3   56.99   30.00
   9  14   3   95.79   41.00
   9  14   3  125.39   35.50
  10  14   3   56.29   28.50
  10  14   3   39.40   38.60
  11  14   3   52.09   28.70
  11  14   3   34.30   36.60
  12  14   3   15.50   36.10
  13  14   3   60.29   47.20
  14  14   3   55.09   51.79
  -9  15   3    7.30   35.40
  -8  15   3   28.30   36.60
  -7  15   3  -18.30   29.20
  -6  15   3   28.80   34.90
  -5  15   3  -15.10   27.60
  -5  15   3    0.20   20.70
  -4  15   3  -22.20   21.10
  -4  15   3   11.60   25.30
  -3  15   3   79.19   30.70
  -3  15   3   54.69   33.70
  -2  15   3   49.90   27.20
  -2  15   3   22.50   25.60
  -1  15   3   56.09   26.10
  -1  15   3   13.60   23.20
   0 -15  -3   72.69   21.40
   0  15   3   53.09   23.90
   0  15   3   64.59   30.30
  -1 -15  -3  -18.00   13.80
   1  15   3   -7.50   16.20
   1  15   3  -11.40   23.50
  -2 -15  -3   18.50   17.20
   2  15   3   27.50   16.60
   2  15   3   -9.70   20.10
  -3 -15  -3  100.29   27.90
  -3 -15  -3   76.19   20.00
   3  15   3  108.09   34.60
   3  15   3   86.09   20.00
  -4 -15  -3  202.48   39.80
   4  15   3  171.48   39.30
   4  15   3  165.58   40.30
  -5 -15  -3   73.99   28.90
   5  15   3   49.40   28.20
   5  15   3   79.89   33.70
  -6 -15  -3   51.99   26.80
   6  15   3   14.60   21.40
   6  15   3    2.90   21.60
  -7 -15  -3  109.19   35.40
   7  15   3   19.90   27.80
   7  15   3  145.99   40.20
   8  15   3   30.10   30.70
   8  15   3   27.90   25.60
   9  15   3    8.80   31.70
   9  15   3    6.90   23.80
  10  15   3   24.70   26.60
  10  15   3  -37.90   25.90
  11  15   3   51.79   38.50
  11  15   3   29.80   26.80
  12  15   3   37.10   38.80
  13  15   3   17.00   43.90
  -9  16   3  -17.80   37.60
  -8  16   3  -14.40   29.30
  -7  16   3   11.10   33.30
  -6  16   3   42.20   38.30
  -5  16   3   34.10   29.30
  -5  16   3   26.20   32.40
  -4  16   3   80.09   35.20
  -4  16   3   74.89   31.30
  -3  16   3   -8.20   21.70
  -3  16   3  -16.80   23.00
  -2  16   3  -22.30   21.80
  -2  16   3  -28.40   21.10
  -1  16   3   58.79   30.50
  -1  16   3   57.59   29.70
   0  16   3   62.49   32.90
   0  16   3   60.69   27.20
  -1 -16  -3   55.19   22.10
   1  16   3   39.60   21.80
   1  16   3   14.10   24.60
  -2 -16  -3   43.30   21.00
   2  16   3   73.19   31.70
   2  16   3   15.50   17.40
  -3 -16  -3   62.19   24.30
  -3 -16  -3   37.40   19.20
   3  16   3   31.50   27.70
  -4 -16  -3   -4.50   19.60
   4  16   3   -8.50   22.60
   4  16   3    3.30   19.30
  -5 -16  -3   41.40   25.10
   5  16   3   41.90   27.40
   5  16   3   46.90   29.80
  -6 -16  -3   10.70   23.60
   6  16   3   26.30   24.30
   6  16   3   14.50   25.10
  -7 -16  -3   65.89   31.40
   7  16   3    0.80   26.80
   7  16   3   -1.20   23.60
   8  16   3   19.20   29.90
   8  16   3   28.60   26.30
   9  16   3  -19.60   25.50
   9  16   3   -0.90   24.40
  10  16   3   -9.30   34.10
  10  16   3   -2.30   24.30
  11  16   3   19.20   37.70
  11  16   3  -47.80   22.40
  12  16   3  -18.70   34.00
  13  16   3  -28.70   37.90
  -8  17   3   16.90   41.30
  -7  17   3   -4.60   32.10
  -6  17   3   34.10   37.60
  -5  17   3  -12.70   28.80
  -4  17   3   53.99   32.20
  -4  17   3   30.90   27.00
  -3  17   3   22.20   27.10
  -3  17   3   24.10   31.10
  -2  17   3   39.50   26.30
  -2  17   3   -0.80   23.00
  -1  17   3   27.30   31.20
  -1  17   3   -4.20   22.60
   0  17   3  -12.00   23.40
   0  17   3   -2.50   21.40
  -1 -17  -3   76.19   29.90
   1  17   3   -3.90   25.70
   1  17   3   33.80   22.30
  -2 -17  -3   -2.30   16.60
   2  17   3   13.50   22.20
   2  17   3  -15.30   24.00
  -3 -17  -3  -34.80   15.00
   3  17   3  -38.70   21.10
  -4 -17  -3   34.30   23.90
   4  17   3    4.50   24.10
   4  17   3  -41.40   16.30
  -5 -17  -3  103.89   33.90
   5  17   3   66.79   34.20
   5  17   3   20.80   26.90
  -6 -17  -3   24.30   27.10
   6  17   3   18.90   28.20
   6  17   3   27.40   27.60
  -7 -17  -3   51.99   32.50
   7  17   3   36.40   31.70
   7  17   3   39.50   32.90
   8  17   3   20.20   28.70
   8  17   3   22.70   34.00
   9  17   3   20.90   29.80
   9  17   3  -32.20   20.10
  10  17   3   13.80   36.10
  10  17   3   27.80   31.10
  11  17   3  -25.50   27.30
  11  17   3  -33.20   28.80
  12  17   3    9.50   33.00
  12  17   3  -10.50   34.20
  13  17   3  -31.70   36.40
  -7  18   3   49.70   43.40
  -6  18   3  -34.50   31.20
  -5  18   3   -3.00   32.90
  -4  18   3   60.39   40.50
  -4  18   3    7.70   27.20
  -3  18   3  -12.10   21.50
  -3  18   3   -3.00   25.80
  -2  18   3   13.10   25.20
  -2  18   3    1.00   27.40
  -1  18   3   33.60   28.20
  -1  18   3   21.80   28.20
   0  18   3   71.99   28.20
   0  18   3   26.90   29.80
   1  18   3  -41.30   21.50
   1  18   3   14.20   19.80
  -2 -18  -3  -15.60   20.30
   2  18   3  -43.40   27.10
  -3 -18  -3   50.49   25.00
   3  18   3    5.60   28.00
  -4 -18  -3    6.70   22.80
   4  18   3  -24.90   21.00
   4  18   3   43.80   33.40
  -5 -18  -3   -9.40   21.90
   5  18   3   67.39   33.60
   5  18   3   39.40   29.70
  -6 -18  -3   69.09   32.30
   6  18   3   65.09   34.60
   6  18   3   55.29   34.30
  -7 -18  -3   22.00   30.70
   7  18   3   14.70   30.40
   7  18   3   14.00   26.50
  -8 -18  -3   74.89   37.10
   8  18   3   -2.80   30.90
   8  18   3   41.40   29.70
   9  18   3   16.40   26.20
   9  18   3    2.40   31.80
  10  18   3  105.29   41.70
  10  18   3    5.40   34.60
  11  18   3    9.70   38.40
  11  18   3   -0.30   30.00
  12  18   3  -27.40   29.30
  12  18   3   -9.30   40.40
  -7  19   3   44.30   38.60
  -6  19   3   38.50   43.20
  -5  19   3   -4.10   35.70
  -4  19   3  -15.20   26.60
  -4  19   3   53.89   38.30
  -3  19   3  -12.90   25.60
  -3  19   3    0.30   29.50
  -2  19   3    2.50   28.00
  -2  19   3   60.89   36.30
  -1  19   3   12.40   27.80
  -1  19   3  -26.20   28.30
   0  19   3   10.60   23.90
   0  19   3  -16.90   25.50
   1  19   3   -4.90   28.00
   2  19   3   14.60   29.70
  -3 -19  -3   32.50   25.40
   3  19   3  -18.70   25.80
  -4 -19  -3   48.50   27.30
   4  19   3    9.60   26.80
   4  19   3   17.20   36.00
  -5 -19  -3    7.30   24.00
   5  19   3   36.40   31.50
   5  19   3  -27.70   23.60
  -6 -19  -3   19.20   26.50
   6  19   3  -25.40   23.90
   6  19   3   22.90   30.70
  -7 -19  -3   40.30   32.30
   7  19   3   34.40   34.50
   7  19   3   -8.90   27.20
  -8 -19  -3   25.90   32.20
   8  19   3  -47.20   29.00
   8  19   3  -10.60   25.30
   9  19   3    4.90   34.40
   9  19   3    7.50   28.20
  10  19   3  -13.60   31.50
  10  19   3  -43.30   27.70
  11  19   3   18.50   34.20
  11  19   3  -35.80   35.40
  12  19   3   53.79   44.40
  12  19   3   24.60   37.30
  -6  20   3    5.50   42.60
  -5  20   3  -25.10   35.50
  -4  20   3   -6.60   30.60
  -3  20   3   -9.50   25.70
  -3  20   3   68.79   38.20
  -2  20   3    0.90   27.90
  -2  20   3    3.90   28.00
  -1  20   3   10.80   32.70
  -1  20   3    3.20   25.50
   0  20   3   -4.00   30.20
   1  20   3    6.30   29.60
   2  20   3  -36.90   23.40
   3  20   3  -24.70   23.50
  -4 -20  -3  -13.40   26.50
   4  20   3  -29.20   25.20
   4  20   3  -24.30   25.10
  -5 -20  -3  -17.10   23.20
   5  20   3   32.70   31.00
   5  20   3  -11.40   28.20
  -6 -20  -3   33.00   28.60
   6  20   3  -11.90   26.40
   6  20   3   51.89   38.00
  -7 -20  -3  -44.40   23.70
   7  20   3   14.20   33.80
   7  20   3  -22.50   27.50
  -8 -20  -3    2.60   31.50
   8  20   3   71.49   39.20
   8  20   3  -24.10   33.70
   9  20   3   20.30   33.40
   9  20   3  -26.90   24.70
  10  20   3    9.00   35.10
  10  20   3   -9.80   37.30
  11  20   3   -9.10   35.20
  11  20   3  -33.70   36.70
  12  20   3   30.80   47.00
  -5  21   3   35.10   46.20
  -4  21   3   10.10   34.80
  -3  21   3   26.40   33.10
  -3  21   3  -15.60   32.20
  -2  21   3   36.90   32.10
  -2  21   3   17.30   34.50
  -1  21   3   -0.20   30.10
   0  21   3  -42.40   26.50
   1  21   3   -8.80   33.50
   2  21   3    1.50   27.40
   3  21   3   13.90   34.60
   4  21   3  -32.40   28.10
   4  21   3  -24.50   31.10
   5  21   3   65.99   37.80
   5  21   3   40.90   35.10
  -6 -21  -3   28.80   29.90
   6  21   3   47.10   39.50
   6  21   3  -25.90   28.30
  -7 -21  -3   16.00   31.30
   7  21   3    1.30   31.80
   7  21   3  -33.80   27.80
  -8 -21  -3  -38.40   29.00
   8  21   3  -30.10   36.50
   8  21   3   17.90   32.80
   9  21   3   80.09   43.60
   9  21   3   28.80   39.30
  10  21   3  -30.80   34.00
  10  21   3   54.79   44.20
  11  21   3   24.20   43.90
  11  21   3  -45.90   33.80
  -4  22   3   -7.70   37.20
  -3  22   3  -24.90   33.80
  -3  22   3   49.30   36.00
  -2  22   3  -25.20   27.30
  -1  22   3  -33.60   26.80
   0  22   3  -18.80   29.60
   1  22   3   32.30   36.60
   2  22   3   19.40   34.10
   3  22   3  -15.40   30.30
   4  22   3   65.29   43.00
   5  22   3   23.50   48.00
   5  22   3   16.20   35.50
   6  22   3  -19.00   27.40
   6  22   3   21.80   35.50
  -7 -22  -3   23.80   34.20
   7  22   3  -16.70   33.50
   7  22   3   32.80   37.90
  -8 -22  -3   35.60   36.70
   8  22   3  -23.30   30.10
   8  22   3   31.90   40.10
   9  22   3   13.50   39.30
   9  22   3    8.50   34.20
  10  22   3  -24.70   39.90
  10  22   3   18.80   41.00
  -2  23   3  -13.10   30.10
  -1  23   3   19.80   32.30
   0  23   3   -8.00   36.00
   1  23   3   34.70   36.70
   2  23   3  -31.40   33.10
   3  23   3   37.30   34.20
   4  23   3   14.10   34.60
   5  23   3    9.10   36.80
   6  23   3   -1.20   34.00
   7  23   3   23.00   42.00
   7  23   3    5.50   36.60
   8  23   3  -40.30   37.00
   8  23   3  -11.80   38.80
   9  23   3  -32.10   32.70
   9  23   3   55.99   40.60
  -1  24   3  -44.10   36.90
   0  24   3   27.30   38.00
   1  24   3  104.89   49.60
   2  24   3    1.40   37.70
   3  24   3   21.80   38.40
   4  24   3  -15.40   35.30
   5  24   3    5.10   42.80
   6  24   3  -19.60   31.00
   7  24   3   -0.50   30.20
   8  24   3  -65.09   36.80
   8  24   3    6.50   38.90
   0  25   3   22.10   41.90
   1  25   3   46.10   46.20
   2  25   3  -46.50   35.00
   3  25   3  -44.60   33.20
   4  25   3   30.00   33.70
   5  25   3    8.50   42.20
   6  25   3   40.50   45.20
   7  25   3   -8.60   39.30
   4  25  -4   19.50   41.40
   3  25  -4   -8.20   36.50
   7  24  -4   33.60   39.20
  -7 -24   4  -66.59   31.50
   6  24  -4  -33.30   31.70
  -6 -24   4   49.70   42.80
   5  24  -4   38.40   38.50
  -5 -24   4    1.60   37.20
   4  24  -4  -45.10   31.10
   3  24  -4    5.10   36.70
   2  24  -4    2.90   35.00
   1  24  -4  -37.90   35.90
   0  24  -4  -85.49   33.10
   8  23  -4  -29.60   33.60
   8  23  -4  -20.80   40.90
  -8 -23   4    0.20   35.10
   7  23  -4   -0.70   35.90
  -7 -23   4   -1.90   39.10
   6  23  -4   72.39   41.70
  -6 -23   4  -29.90   29.10
   5  23  -4   -5.40   32.30
  -5 -23   4  -38.10   28.50
   4  23  -4  -26.90   28.70
  -4 -23   4   44.80   34.10
   3  23  -4   27.70   36.80
   2  23  -4   29.80   38.90
   1  23  -4    2.90   34.90
   0  23  -4  -12.90   36.10
  -1  23  -4    3.20   35.50
   9  22  -4  -16.40   36.20
   9  22  -4   53.49   48.20
  -9 -22   4   15.70   42.10
   8  22  -4  -62.09   30.60
   8  22  -4  -28.60   32.90
  -8 -22   4   39.80   42.20
   7  22  -4  -27.40   27.40
  -7 -22   4  -28.40   30.50
   6  22  -4   12.80   39.30
  -6 -22   4  -18.10   28.40
   5  22  -4   71.49   41.40
  -5 -22   4   -4.60   32.10
   4  22  -4  -16.00   30.90
  -4 -22   4   56.09   35.60
   3  22  -4   47.50   38.40
  -3 -22   4    0.90   29.20
   2  22  -4  104.49   41.40
   1  22  -4  -12.60   31.50
   0  22  -4    5.80   36.20
  -1  22  -4  -64.49   29.10
  -2  22  -4   39.10   59.49
  10  21  -4   23.20   48.20
  10  21  -4   -2.20   35.00
 -10 -21   4  -45.80   34.50
   9  21  -4   -7.20   33.70
   9  21  -4   21.30   44.90
  -9 -21   4   -0.20   34.50
   8  21  -4  -41.00   34.20
   8  21  -4  -39.40   27.60
  -8 -21   4  -18.20   32.90
   7  21  -4   24.80   36.10
  -7 -21   4   -7.20   32.60
   6  21  -4   -4.50   32.50
  -6 -21   4  -18.40   29.50
   5  21  -4  -38.30   24.70
  -5 -21   4    2.70   33.60
   4  21  -4   47.90   34.80
  -4 -21   4  -33.60   24.60
   3  21  -4  -44.90   27.00
  -3 -21   4   42.80   33.80
   2  21  -4   40.30   32.60
  -2 -21   4   22.50   27.20
   1  21  -4   33.40   33.80
   0  21  -4   71.39   42.50
  -1  21  -4   12.60   31.20
  -2  21  -4    4.10   32.40
  -3  21  -4  -22.80   32.00
  -4  21  -4   28.40   41.80
  11  20  -4   23.80   40.60
  11  20  -4   35.70   43.40
 -11 -20   4  -26.30   35.30
  10  20  -4   19.80   42.90
  10  20  -4    3.90   35.10
 -10 -20   4  -34.60   31.80
   9  20  -4  -44.20   34.20
   9  20  -4   -0.30   36.90
  -9 -20   4  -53.29   28.40
   8  20  -4    0.40   35.00
   8  20  -4  -13.00   41.70
  -8 -20   4  -30.10   25.50
   7  20  -4   36.90   33.40
  -7 -20   4  -10.60   30.30
   6  20  -4   63.19   37.80
  -6 -20   4   42.40   33.60
   5  20  -4   11.90   33.60
  -5 -20   4   49.60   32.10
   4  20  -4  -14.10   24.10
  -4 -20   4   -9.70   28.30
   3  20  -4   57.29   33.30
  -3 -20   4   41.70   28.40
   2  20  -4   16.40   28.80
  -2 -20   4   14.00   26.90
   1  20  -4  -20.70   24.80
  -1 -20   4   22.20   21.90
   0  20  -4   68.99   37.60
  -1  20  -4   -7.50   31.90
  -2  20  -4   19.90   31.60
  -2  20  -4    8.90   29.10
  -3  20  -4   -2.50   32.30
  -4  20  -4   21.20   39.30
  -5  20  -4  -25.10   34.20
  11  19  -4   82.19   51.19
  11  19  -4  -16.80   34.10
 -11 -19   4   23.70   45.70
  10  19  -4    6.40   34.50
  10  19  -4  -67.49   29.90
 -10 -19   4   -5.10   34.40
   9  19  -4  -22.20   30.10
   9  19  -4  -44.20   32.20
  -9 -19   4  -33.30   28.50
   8  19  -4    9.00   31.80
   8  19  -4   -7.50   37.40
  -8 -19   4   83.99   43.80
   7  19  -4  -26.50   23.20
  -7 -19   4   52.99   33.90
   6  19  -4   22.40   34.10
  -6 -19   4  -22.30   25.00
   5  19  -4   40.50   31.90
  -5 -19   4   15.50   28.60
   4  19  -4   52.49   37.10
  -4 -19   4   43.80   30.90
   3  19  -4  -21.90   21.90
  -3 -19   4   11.30   28.30
   2  19  -4   60.99   33.50
  -2 -19   4   36.10   31.30
   1  19  -4   29.10   30.30
  -1 -19   4   56.19   30.50
   0  19  -4  -23.00   23.80
   0 -19   4   19.50   25.40
  -1  19  -4  -36.20   23.80
  -1  19  -4   34.70   32.70
   1 -19   4   43.90   41.80
  -2  19  -4   21.20   28.90
  -2  19  -4   -9.60   27.20
  -3  19  -4   17.70   29.20
  -3  19  -4  -33.60   24.00
  -4  19  -4  -46.70   22.40
  -5  19  -4   43.40   36.70
  -6  19  -4  -50.69   32.00
  12  18  -4   22.70   48.00
  12  18  -4  -13.70   32.30
  11  18  -4   42.10   37.20
  11  18  -4  -51.99   37.60
 -11 -18   4   -1.90   37.00
  10  18  -4  -11.30   37.50
  10  18  -4  -17.50   34.60
 -10 -18   4   29.90   36.80
   9  18  -4    3.00   33.60
   9  18  -4   30.90   38.40
  -9 -18   4  -18.40   29.60
   8  18  -4    1.60   35.60
   8  18  -4   16.10   34.20
  -8 -18   4   18.60   30.40
   7  18  -4   27.40   33.10
  -7 -18   4   39.00   31.20
   6  18  -4  -27.50   23.90
  -6 -18   4  -21.20   25.00
   5  18  -4   -1.50   28.70
  -5 -18   4   97.19   35.10
   4  18  -4    9.50   26.80
  -4 -18   4   12.60   26.60
   3  18  -4   42.00   28.90
  -3 -18   4   -8.50   23.80
   2  18  -4    5.70   29.10
  -2 -18   4   63.59   33.00
   1  18  -4  -32.50   17.90
  -1 -18   4   18.70   25.70
   0  18  -4  140.09   40.40
   0  18  -4   57.59   31.50
   0 -18   4  134.19   33.60
  -1  18  -4   18.60   28.70
  -1  18  -4   40.00   30.90
   1 -18   4   58.49   27.70
  -2  18  -4  -27.60   25.60
  -2  18  -4  -43.20   20.70
   2 -18   4   70.09   45.90
  -3  18  -4  -34.50   22.60
  -3  18  -4   44.50   31.00
  -4  18  -4   18.50   31.30
  -5  18  -4  -12.70   32.60
  -6  18  -4   29.50   38.40
  -7  18  -4   11.00   40.80
  12  17  -4  -32.50   31.80
  12  17  -4   31.30   42.90
  11  17  -4   29.30   36.10
  11  17  -4  -17.60   35.00
 -11 -17   4   40.50   42.60
  10  17  -4  -13.30   33.70
  10  17  -4   46.30   34.70
 -10 -17   4   52.89   37.80
   9  17  -4   69.39   46.80
   9  17  -4    5.10   27.30
  -9 -17   4  -19.60   25.50
   8  17  -4   17.10   28.80
   8  17  -4   -7.70   34.50
  -8 -17   4   17.30   30.20
   7  17  -4   -2.70   25.40
  -7 -17   4    8.30   25.00
   6  17  -4    4.70   25.60
  -6 -17   4    1.10   25.10
   5  17  -4   49.70   33.90
  -5 -17   4   35.50   26.00
   4  17  -4   11.10   25.60
  -4 -17   4   34.60   29.10
   3  17  -4   50.39   29.30
  -3 -17   4   -3.30   23.50
   2  17  -4   -6.70   26.70
  -2 -17   4   48.90   27.50
   1  17  -4   16.70   23.20
   1  17  -4   11.00   25.40
  -1 -17   4  -29.40   19.50
   0  17  -4    6.20   23.20
   0  17  -4   30.00   25.00
   0 -17   4   30.20   24.10
  -1  17  -4   27.40   24.30
  -1  17  -4   30.30   27.10
   1 -17   4   68.89   28.90
  -2  17  -4   14.00   29.70
  -2  17  -4   -5.60   28.10
   2 -17   4   12.30   26.20
  -3  17  -4   40.20   28.20
  -3  17  -4  -26.80   28.00
   3 -17   4    9.00   39.30
  -4  17  -4  -33.00   26.10
  -5  17  -4   39.10   35.90
  -6  17  -4  -16.40   30.30
  -7  17  -4  -40.80   31.80
  -8  17  -4   -1.90   36.40
  13  16  -4   28.40   43.60
  12  16  -4  -14.00   35.20
  12  16  -4  -19.80   30.80
  11  16  -4  -14.30   28.60
  11  16  -4    8.50   37.60
 -11 -16   4    2.20   37.30
  10  16  -4    9.90   28.40
  10  16  -4    0.40   37.40
 -10 -16   4   13.50   33.00
   9  16  -4   21.30   37.00
   9  16  -4   27.90   33.80
  -9 -16   4   36.90   34.80
   8  16  -4   14.60   27.00
   8  16  -4    0.40   34.30
  -8 -16   4   30.90   32.00
   7  16  -4   -2.80   24.80
  -7 -16   4   -8.50   26.70
   6  16  -4   39.20   32.40
  -6 -16   4    1.00   25.20
   5  16  -4   17.00   23.90
  -5 -16   4   58.89   31.00
   4  16  -4  -26.10   18.10
  -4 -16   4   -1.50   22.10
   3  16  -4    9.40   24.20
  -3 -16   4   -5.30   22.10
   2  16  -4  108.99   31.60
   2  16  -4   79.99   34.50
  -2 -16   4  115.99   35.70
   1  16  -4   46.90   26.50
   1  16  -4   70.29   28.40
  -1 -16   4  101.99   32.70
   0  16  -4   14.10   23.20
   0  16  -4   -1.50   21.10
   0 -16   4   15.40   18.90
  -1  16  -4  -24.80   18.20
  -1  16  -4    1.20   22.80
   1 -16   4    3.20   18.80
  -2  16  -4    1.70   26.20
  -2  16  -4  -10.90   20.80
   2 -16   4   37.70   24.50
  -3  16  -4   43.40   33.30
  -3  16  -4   21.20   25.00
   3 -16   4    4.70   26.10
  -4  16  -4   95.19   38.40
  -5  16  -4   10.40   29.00
  -6  16  -4   26.30   31.70
  -7  16  -4   31.90   38.00
  -8  16  -4  -20.30   33.40
  13  15  -4    5.10   40.60
  12  15  -4   45.70   37.90
  12  15  -4   96.79   52.69
  11  15  -4   46.20   40.80
  11  15  -4   13.40   31.90
 -11 -15   4   29.40   36.90
  10  15  -4   -1.80   34.90
  10  15  -4   37.30   32.70
 -10 -15   4  -11.70   25.20
   9  15  -4    8.10   27.60
   9  15  -4  -42.50   28.00
  -9 -15   4    0.40   26.30
   8  15  -4   42.60   31.10
   8  15  -4  -41.90   27.60
  -8 -15   4   -7.00   24.30
   7  15  -4  227.58   49.30
  -7 -15   4  209.78   50.19
   6  15  -4   59.29   31.80
  -6 -15   4   45.70   29.70
   5  15  -4   29.50   28.20
  -5 -15   4   -7.00   22.50
   4  15  -4  -36.90   20.30
  -4 -15   4   34.60   26.60
   3  15  -4   14.60   23.90
  -3 -15   4  -10.10   18.90
   2  15  -4   29.90   20.30
   2  15  -4   52.99   26.40
  -2 -15   4  110.99   31.20
   1  15  -4  151.08   40.40
   1  15  -4  196.28   37.50
  -1 -15   4  233.58   42.70
   0  15  -4    7.90   19.50
   0  15  -4   42.40   24.00
   0 -15   4   12.50   19.80
  -1  15  -4   33.60   26.30
  -1  15  -4   12.30   22.30
   1 -15   4  -43.20   23.90
  -2  15  -4   22.30   23.30
  -2  15  -4  -14.60   16.30
   2 -15   4   41.60   23.50
  -3  15  -4  -14.10   22.30
  -3  15  -4   -7.00   20.90
   3 -15   4  -27.60   24.40
  -4  15  -4   36.50   25.80
  -4  15  -4   28.60   29.30
   4 -15   4   18.40   29.00
  -5  15  -4   21.00   31.90
  -6  15  -4   73.59   38.50
  -7  15  -4   22.00   35.90
  -8  15  -4   37.70   39.40
  -9  15  -4  -40.10   36.70
  13  14  -4   22.40   39.40
  12  14  -4   -8.20   31.20
  12  14  -4   38.00   37.60
  11  14  -4  -31.00   25.90
  11  14  -4   17.80   36.20
 -11 -14   4   -6.00   30.10
  10  14  -4   56.79   39.90
  10  14  -4  -13.20   26.30
 -10 -14   4  -28.70   22.20
   9  14  -4   21.40   26.60
   9  14  -4   57.09   34.40
  -9 -14   4    1.90   27.10
   8  14  -4   -3.20   29.90
   8  14  -4  -17.70   20.20
  -8 -14   4   -1.50   22.70
   7  14  -4  -33.40   17.30
  -7 -14   4    9.30   21.80
   6  14  -4    3.90   22.10
  -6 -14   4   47.80   29.90
   5  14  -4   -6.40   18.70
  -5 -14   4  -10.00   21.60
   4  14  -4   21.10   22.30
  -4 -14   4   60.49   26.10
   3  14  -4   59.69   28.50
   3  14  -4   73.39   20.40
  -3 -14   4   87.99   30.90
   2  14  -4    7.20   20.50
   2  14  -4  -10.90   13.80
  -2 -14   4   -6.30   18.80
   1  14  -4   65.49   25.70
   1  14  -4   35.30   20.80
  -1 -14   4   41.40   23.40
   0  14  -4   10.90   18.10
   0  14  -4   29.00   24.00
   0 -14   4  -35.40   17.70
  -1  14  -4   11.80   19.40
  -1  14  -4   28.90   21.30
   1 -14   4    2.70   17.70
  -2  14  -4   39.80   23.00
  -2  14  -4   49.10   27.00
   2 -14   4   10.90   22.00
  -3  14  -4   34.60   30.10
  -3  14  -4   37.60   25.20
   3 -14   4   66.29   27.90
  -4  14  -4  157.18   44.40
  -4  14  -4  103.09   30.30
   4 -14   4  158.88   40.00
  -5  14  -4   -4.40   30.70
   5 -14   4   55.29   32.50
  -6  14  -4  -24.50   20.10
  -7  14  -4  -12.80   26.00
  -8  14  -4    3.20   30.60
  -9  14  -4   11.40   32.70
 -10  14  -4   78.79   52.99
  13  13  -4   -5.70   35.20
  12  13  -4  -25.30   27.80
  12  13  -4   27.10   36.90
  11  13  -4  -17.40   25.80
  11  13  -4   43.40   29.40
 -11 -13   4   -6.70   37.50
  10  13  -4   24.80   32.10
  10  13  -4   23.50   29.70
 -10 -13   4   25.70   32.00
   9  13  -4   65.29   38.20
   9  13  -4   -8.80   25.90
  -9 -13   4   24.90   30.80
   8  13  -4   91.59   39.70
   8  13  -4  102.79   34.10
  -8 -13   4   61.29   30.50
   7  13  -4   61.99   30.40
  -7 -13   4   20.70   24.80
   6  13  -4  -21.70   16.40
  -6 -13   4   14.70   22.10
   5  13  -4   -7.70   15.70
  -5 -13   4   18.00   22.90
   4  13  -4   12.40   20.00
  -4 -13   4   -3.30   18.60
   3  13  -4   -9.30    9.80
   3  13  -4   13.90   17.80
  -3 -13   4   16.10   20.00
   2  13  -4   91.89   31.10
   2  13  -4   61.79   20.30
  -2 -13   4   95.49   29.10
   1  13  -4  490.35   54.09
   1  13  -4  494.85   59.79
  -1 -13   4  411.56   57.89
   0  13  -4  136.59   34.50
   0  13  -4  224.78   40.40
   0 -13   4  250.97   40.00
  -1  13  -4   -8.80   18.70
  -1  13  -4  -26.90   13.80
   1 -13   4   22.40   17.60
  -2  13  -4  196.78   37.10
  -2  13  -4  164.78   36.70
   2 -13   4  135.29   35.00
  -3  13  -4  -10.80   17.30
  -3  13  -4  -21.40   18.80
   3 -13   4   -5.50   18.80
  -4  13  -4   66.59   21.70
  -4  13  -4   25.10   27.50
   4 -13   4   12.50   24.70
  -5  13  -4   50.99   31.90
   5 -13   4   36.90   28.70
  -6  13  -4   -9.60   25.30
   6 -13   4  -23.60   25.10
  -7  13  -4   16.80   29.00
  -8  13  -4   10.30   34.20
  -9  13  -4  -25.80   26.90
 -10  13  -4  -26.90   35.80
  14  12  -4  -28.40   31.80
  13  12  -4  -48.20   31.50
  12  12  -4   27.50   38.30
  12  12  -4   50.79   39.00
  11  12  -4   56.19   33.40
  11  12  -4   -2.80   26.10
  10  12  -4  -14.10   24.90
  10  12  -4   14.30   24.30
 -10 -12   4   -4.40   29.70
   9  12  -4  150.78   40.90
   9  12  -4  149.09   45.00
  -9 -12   4   81.19   36.20
   8  12  -4   49.50   30.90
   8  12  -4   77.99   31.60
  -8 -12   4   40.60   28.90
   7  12  -4   21.50   21.60
  -7 -12   4   34.40   25.90
   6  12  -4   54.79   25.60
  -6 -12   4   34.10   23.10
   5  12  -4  -14.10   15.10
  -5 -12   4  -11.60   18.40
   4  12  -4   44.30   12.00
   4  12  -4   30.00   22.20
  -4 -12   4   -6.10   16.90
   3  12  -4   50.99   24.20
   3  12  -4   48.60   16.10
  -3 -12   4   96.79   29.70
   2  12  -4    8.80   13.60
   2  12  -4   24.20   22.40
  -2 -12   4   36.50   20.70
   1  12  -4    4.80   13.40
   1  12  -4   23.10   20.60
  -1 -12   4  -12.10   13.80
   0  12  -4   18.20   17.80
   0  12  -4   16.50   19.90
   0 -12   4    1.10   17.20
  -1  12  -4  112.79   27.90
  -1  12  -4  115.19   29.10
   1 -12   4   86.29   31.60
  -2  12  -4   92.99   29.80
  -2  12  -4    6.90   16.90
   2 -12   4   45.80   22.80
  -3  12  -4  145.79   38.70
  -3  12  -4  197.18   36.00
   3 -12   4  157.08   35.90
  -4  12  -4   -7.50   16.50
  -4  12  -4  -28.60   18.70
   4 -12   4  -20.50   18.40
  -5  12  -4   -6.20   18.40
   5 -12   4  -23.90   21.60
  -6  12  -4   -2.20   24.20
   6 -12   4   10.40   26.90
  -7  12  -4   -1.10   29.80
   7 -12   4   -8.60   29.00
  -8  12  -4  -16.70   29.40
  -9  12  -4   43.40   41.60
 -10  12  -4  -23.40   30.90
  14  11  -4   49.10   39.80
  13  11  -4   76.59   44.60
  12  11  -4    0.10   29.80
  11  11  -4  -35.60   20.40
  11  11  -4  -13.70   23.50
  10  11  -4    6.70   26.20
  10  11  -4   51.89   30.30
 -10 -11   4   40.80   32.80
   9  11  -4   55.29   33.70
   9  11  -4   41.00   27.40
  -9 -11   4    3.60   25.40
   8  11  -4   85.29   33.20
   8  11  -4   64.69   34.30
  -8 -11   4   52.09   31.40
   7  11  -4   61.79   31.00
  -7 -11   4   62.19   31.20
   6  11  -4    6.60   19.00
  -6 -11   4   -3.60   14.50
   5  11  -4   10.00   17.90
  -5 -11   4  -10.40   17.60
   4  11  -4   14.80   18.20
   4  11  -4   64.99   12.70
  -4 -11   4   22.40   19.20
   3  11  -4  196.78   24.20
   3  11  -4  144.99   33.10
  -3 -11   4  124.69   31.40
   2  11  -4  104.09   20.70
   2  11  -4   43.90   20.30
  -2 -11   4   85.69   25.90
   1  11  -4   16.20   14.10
   1  11  -4    5.60   15.50
  -1 -11   4  -15.00   11.90
   0  11  -4  423.36   51.29
   0  11  -4  440.76   53.09
   0 -11   4  429.66   53.29
  -1  11  -4   -7.40   15.80
  -1  11  -4    3.50   16.90
   1 -11   4   40.20   18.80
  -2  11  -4  280.67   40.50
  -2  11  -4  299.87   43.50
   2 -11   4  266.07   45.30
  -3  11  -4  -18.00   18.60
  -3  11  -4   -8.20   14.80
   3 -11   4   -0.20   17.50
  -4  11  -4    8.80   16.80
  -4  11  -4   -1.20   18.60
   4 -11   4   19.60   22.40
  -5  11  -4  220.78   35.30
  -5  11  -4  251.37   51.39
   5 -11   4  154.38   42.40
  -6  11  -4    7.10   25.00
   6 -11   4   28.50   30.00
  -7  11  -4   -2.70   24.00
   7 -11   4  -22.60   26.10
  -8  11  -4   45.40   35.10
   8 -11   4  -10.00   31.20
  -9  11  -4    7.50   35.20
 -10  11  -4   28.70   38.00
 -11  11  -4   10.70   34.50
  14  10  -4  -15.30   30.30
  13  10  -4   62.29   41.10
  12  10  -4  -29.20   27.30
  11  10  -4   48.10   33.60
  11  10  -4   42.00   28.80
  10  10  -4   17.40   29.90
  10  10  -4  -24.20   18.90
 -10 -10   4  -14.70   26.40
   9  10  -4   45.50   31.60
   9  10  -4   42.30   28.10
  -9 -10   4   56.09   33.40
   8  10  -4   42.70   28.30
   8  10  -4   44.70   26.50
  -8 -10   4   37.60   28.30
   7  10  -4  133.49   35.00
  -7 -10   4   94.39   33.10
   6  10  -4   51.09   25.10
  -6 -10   4   31.10   21.80
   5  10  -4  190.48   19.90
   5  10  -4  201.28   39.30
  -5 -10   4  169.78   36.90
   4  10  -4   22.30    8.70
   4  10  -4   -0.40   15.50
  -4 -10   4    7.80   15.40
   3  10  -4   60.59   15.30
   3  10  -4   57.39   24.90
  -3 -10   4   54.09   22.40
   2  10  -4   -1.80   10.20
   2  10  -4  -11.60   13.80
  -2 -10   4    5.70   13.90
   1  10  -4   69.89   23.50
   1  10  -4  127.49   23.80
  -1 -10   4   93.49   25.60
   0  10  -4  349.27   40.60
   0  10  -4  278.77   41.00
   0 -10   4  231.48   40.00
  -1  10  -4   -6.20   15.30
  -1  10  -4   13.10   16.20
   1 -10   4   -8.80   15.30
  -2  10  -4    2.00   15.60
  -2  10  -4    3.50   16.30
   2 -10   4    5.50   16.30
  -3  10  -4  443.46   58.79
  -3  10  -4  430.86   49.90
   3 -10   4  458.45   57.79
  -4  10  -4   25.50   17.80
  -4  10  -4  116.09   34.70
   4 -10   4   40.60   24.90
  -5  10  -4   28.10   16.00
  -5  10  -4   45.30   28.10
   5 -10   4   12.20   30.60
  -6  10  -4    8.40   26.40
   6 -10   4  -14.30   31.60
  -7  10  -4  -46.40   23.40
   7 -10   4   -4.40   28.70
  -8  10  -4   46.90   38.10
   8 -10   4  100.89   38.60
  -9  10  -4  -17.50   31.30
   9 -10   4  -20.90   24.80
 -10  10  -4  -53.09   25.20
 -11  10  -4  -40.10   33.70
  14   9  -4   -4.40   37.20
  13   9  -4   12.70   35.90
  12   9  -4    3.00   30.00
  11   9  -4  -10.70   27.30
  11   9  -4   -9.20   18.10
  10   9  -4   29.40   24.60
  10   9  -4   69.19   38.00
   9   9  -4   12.70   24.90
   9   9  -4   41.70   24.70
  -9  -9   4   24.50   25.70
   8   9  -4   -1.50   17.70
   8   9  -4  -18.90   20.70
  -8  -9   4   -6.00   20.70
   7   9  -4   44.10   21.60
   7   9  -4   68.39   32.30
  -7  -9   4   -8.90   18.50
   6   9  -4    6.90    8.30
   6   9  -4    5.10   18.30
  -6  -9   4   24.10   21.70
   5   9  -4    3.10   16.80
   5   9  -4   11.60    6.90
  -5  -9   4    1.00   16.10
   4   9  -4  691.63   59.79
   4   9  -4  668.83   72.19
  -4  -9   4  690.43   73.49
   3   9  -4   21.30   17.70
   3   9  -4   19.80   10.10
  -3  -9   4  -26.60   11.00
   2   9  -4   90.49   25.00
   2   9  -4   50.29   15.50
  -2  -9   4   29.30   16.50
   1   9  -4  476.75   57.39
   1   9  -4  576.34   54.59
  -1  -9   4  541.65   58.99
   0   9  -4  479.35   53.89
   0   9  -4  545.05   53.29
   0  -9   4  423.36   54.69
  -1   9  -4   42.50   18.40
  -1   9  -4   84.89   23.80
   1  -9   4   20.80   19.10
  -2   9  -4   93.19   26.30
  -2   9  -4  101.99   22.70
   2  -9   4   59.59   22.60
  -3   9  -4  202.38   30.80
  -3   9  -4  108.39   31.30
   3  -9   4  212.98   37.70
  -4   9  -4  173.58   29.20
  -4   9  -4  200.78   41.00
   4  -9   4  188.98   43.00
  -5   9  -4   28.60   14.60
  -5   9  -4   10.50   19.80
   5  -9   4  -18.70   21.60
  -6   9  -4   82.99   36.20
   6  -9   4  118.19   36.70
  -7   9  -4   36.10   29.20
   7  -9   4    7.80   24.00
  -8   9  -4   18.40   28.40
   8  -9   4  -16.60   20.80
  -9   9  -4    8.00   33.00
   9  -9   4   11.70   25.40
 -10   9  -4  -43.60   34.90
  10  -9   4  -15.40   26.10
 -11   9  -4   19.30   39.20
 -12   9  -4   17.30   38.30
  14   8  -4   -8.90   33.30
  13   8  -4   13.40   34.10
  12   8  -4   11.20   29.40
  11   8  -4   17.00   22.60
  11   8  -4   14.60   25.90
  10   8  -4   11.30   26.00
  10   8  -4    9.60   19.00
   9   8  -4   60.59   27.80
   9   8  -4   69.99   31.30
  -9  -8   4   77.09   33.00
   8   8  -4   27.80   18.80
   8   8  -4    4.00   21.90
  -8  -8   4   -1.30   20.00
   7   8  -4  261.17   45.10
   7   8  -4  280.77   53.09
   7   8  -4  206.78   28.40
  -7  -8   4  310.67   48.80
   6   8  -4  661.23   76.09
   6   8  -4  729.83   64.19
  -6  -8   4  753.42   81.29
   5   8  -4   76.79   13.60
   5   8  -4   71.99   23.00
  -5  -8   4   54.29   22.30
   4   8  -4   84.59   24.90
   4   8  -4  120.89   15.80
  -4  -8   4   66.99   23.70
   3   8  -4   58.79   14.80
   3   8  -4   34.40   20.10
  -3  -8   4   35.60   19.90
   2   8  -4  446.56   41.80
   2   8  -4  382.46   47.00
  -2  -8   4  356.36   51.69
   1   8  -4   22.00   18.50
   1   8  -4   34.20   14.70
  -1  -8   4   44.80   20.20
   0   8  -4   43.40   18.90
   0   8  -4   66.59   19.90
   0  -8   4   44.00   22.60
  -1   8  -4   42.70   19.20
  -1   8  -4   12.20   14.80
   1  -8   4   24.00   27.40
  -2   8  -4   83.79   19.60
  -2   8  -4  109.39   27.40
   2  -8   4   26.50   19.70
  -3   8  -4   92.69   29.10
  -3   8  -4   53.69   17.60
   3  -8   4   68.39   26.40
  -4   8  -4   42.50   22.30
  -4   8  -4   44.30   15.30
   4  -8   4   30.70   25.10
  -5   8  -4   24.60   13.00
  -5   8  -4   -5.90   16.20
   5  -8   4   13.50   22.00
  -6   8  -4   -2.70   21.50
   6  -8   4   23.60   21.80
  -7   8  -4   -1.10   27.10
   7  -8   4    3.60   24.90
  -8   8  -4   11.30   27.80
   8  -8   4    7.00   24.30
  -9   8  -4  -23.20   27.70
   9  -8   4   -3.90   22.40
 -10   8  -4   13.20   29.70
  10  -8   4  -21.80   24.90
 -11   8  -4   42.90   37.80
  11  -8   4    4.10   29.50
 -12   8  -4  -16.60   34.50
  14   7  -4   -7.80   28.60
  13   7  -4  -24.30   28.80
  12   7  -4   -9.60   27.70
  11   7  -4   55.89   33.70
  10   7  -4   38.50   28.00
  10   7  -4   47.10   23.40
   9   7  -4   11.60   18.30
   9   7  -4  -53.99   15.40
  -9  -7   4   -0.80   13.80
  -9  -7   4   19.00   25.70
   8   7  -4    3.70   18.90
   8   7  -4  -29.10   11.20
   8   7  -4   -9.60   16.40
  -8  -7   4    5.20   21.00
  -8  -7   4    0.50   13.10
   7   7  -4  349.67   39.70
   7   7  -4  344.77   48.40
   7   7  -4  385.26   55.49
  -7  -7   4  383.76   54.89
   6   7  -4  210.58   35.90
   6   7  -4  175.98   23.70
  -6  -7   4  152.68   35.80
   5   7  -4  183.08   33.40
   5   7  -4  208.88   24.20
  -5  -7   4  153.88   32.30
   4   7  -4  761.62   65.89
   4   7  -4  761.32   76.49
  -4  -7   4  714.03   75.79
   3   7  -4   69.59   13.80
   3   7  -4   58.29   22.10
  -3  -7   4   81.29   22.70
   2   7  -4   98.49   17.90
   2   7  -4  120.09   26.00
  -2  -7   4  134.59   26.80
   1   7  -4   11.00   13.20
   1   7  -4   16.10   11.80
  -1  -7   4    2.40   14.40
   0   7  -4  260.67   34.80
   0   7  -4  236.58   32.90
   0  -7   4  265.77   36.40
  -1   7  -4  178.98   26.90
  -1   7  -4  172.28   30.30
   1  -7   4  119.89   27.70
  -2   7  -4    8.40   12.60
  -2   7  -4   17.00   16.90
   2  -7   4  -51.29   29.20
  -3   7  -4   36.20   19.20
  -3   7  -4   61.99   17.00
   3  -7   4  101.39   29.40
  -4   7  -4   44.70   20.90
  -4   7  -4   12.40   11.20
   4  -7   4  -15.10   15.60
  -5   7  -4   92.69   30.10
  -5   7  -4   88.69   16.40
   5  -7   4   74.59   24.80
  -6   7  -4  -21.90   16.90
   6  -7   4   -2.00   16.00
  -7   7  -4   72.99   29.90
   7  -7   4   60.99   25.80
  -8   7  -4   29.50   27.40
   8  -7   4   40.10   24.00
  -9   7  -4  -18.30   26.90
   9  -7   4  -36.10   17.20
 -10   7  -4   28.90   36.60
  10  -7   4   -7.30   19.40
 -11   7  -4    0.10   25.40
  11  -7   4  -23.90   24.40
 -12   7  -4  -33.50   33.70
  14   6  -4   26.80   35.00
  13   6  -4  -43.10   23.80
  12   6  -4   38.50   33.40
  11   6  -4   35.70   32.20
  10   6  -4   24.50   19.10
  10   6  -4  109.19   37.70
   9   6  -4   86.49   23.60
   9   6  -4  119.89   29.90
   9   6  -4   78.39   32.00
  -9  -6   4   65.29   23.70
   8   6  -4  131.89   26.90
   8   6  -4   90.39   31.40
   8   6  -4  109.09   28.70
  -8  -6   4  130.49   36.30
  -8  -6   4  180.68   29.30
   7   6  -4   26.10   22.10
   7   6  -4   24.20   19.30
   7   6  -4   29.90   14.60
  -7  -6   4   68.59   17.50
  -7  -6   4   53.69   25.80
   6   6  -4   15.40   11.40
   6   6  -4    9.80   14.80
   6   6  -4   21.70   20.30
  -6  -6   4  -21.60   15.30
   5   6  -4  -15.70   13.80
   5   6  -4   -7.60    8.60
  -5  -6   4   18.20   17.60
   4   6  -4   39.70   11.80
   4   6  -4   43.20   17.80
  -4  -6   4    9.70   19.80
   3   6  -4 1502.35  136.29
   3   6  -4 1578.44  128.69
  -3  -6   4 1560.84  137.49
   2   6  -4  358.06   35.10
   2   6  -4  296.07   41.90
  -2  -6   4  359.46   42.60
   1   6  -4  639.84   60.79
   1   6  -4  573.04   56.09
  -1  -6   4  603.74   60.69
   0   6  -4  211.78   29.30
   0   6  -4  198.88   28.10
   0  -6   4  179.48   30.40
  -1   6  -4   55.09   16.20
  -1   6  -4   49.70   19.00
   1  -6   4   24.80   15.60
  -2   6  -4   -5.80   13.50
  -2   6  -4  -16.70    9.10
   2  -6   4   32.50   19.10
  -3   6  -4  -11.20   13.40
  -3   6  -4   -8.20    9.10
   3  -6   4   18.20   41.90
  -4   6  -4  243.38   27.50
  -4   6  -4  232.28   41.90
   4  -6   4  230.48   41.20
  -5   6  -4  496.15   59.19
  -5   6  -4  402.86   39.30
   5  -6   4  449.76   53.09
  -6   6  -4   14.40   21.20
   6  -6   4   15.80   20.40
  -7   6  -4   -3.40   17.20
   7  -6   4   10.50   20.70
  -8   6  -4   41.20   27.60
   8  -6   4   42.60   24.70
  -9   6  -4   20.50   26.90
   9  -6   4   18.30   22.10
 -10   6  -4    2.60   29.40
  10  -6   4   18.00   24.60
 -11   6  -4   28.20   36.10
  11  -6   4   -2.80   26.10
 -12   6  -4   32.10   39.70
  12  -6   4  -45.30   23.40
 -13   6  -4   -4.40   36.50
  14   5  -4   26.50   34.10
  13   5  -4   41.60   30.80
  12   5  -4  -34.80   23.70
  11   5  -4   28.50   29.20
  10   5  -4  -14.80   15.80
  10   5  -4   30.70   26.80
 -10  -5   4   11.70   19.90
   9   5  -4   10.60   18.20
   9   5  -4    2.30   21.40
  -9  -5   4   13.50   17.50
   8   5  -4   -3.30   14.20
   8   5  -4   43.90   26.60
  -8  -5   4   33.40   23.80
  -8  -5   4  -21.10   12.50
   7   5  -4  302.47   38.10
   7   5  -4  344.77   50.79
   7   5  -4  308.07   42.30
  -7  -5   4  280.87   50.59
  -7  -5   4  337.07   39.10
   6   5  -4  814.62   82.29
   6   5  -4  713.33   74.29
   6   5  -4  707.33   68.69
  -6  -5   4  699.13   68.79
  -6  -5   4  869.21   81.39
   5   5  -4   55.69   20.00
   5   5  -4   56.99   14.70
  -5  -5   4   47.70   20.00
   4   5  -4  602.84   56.09
   4   5  -4  645.54   63.59
  -4  -5   4  649.74   66.29
   3   5  -4  155.88   19.60
   3   5  -4  221.98   32.70
  -3  -5   4  123.29   27.60
   2   5  -4    6.50   15.30
   2   5  -4   22.40    9.60
  -2  -5   4   33.20   16.30
   1   5  -4  264.17   31.40
   1   5  -4  285.27   36.00
  -1  -5   4  323.97   37.10
   0   5  -4  756.32   70.79
   0   5  -4  786.62   71.39
   0  -5   4  782.32   73.19
  -1   5  -4   14.20   11.90
  -1   5  -4   16.20   14.20
   1  -5   4   23.20   15.80
  -2   5  -4   54.49   19.30
  -2   5  -4   38.80   13.10
   2  -5   4   44.20   21.70
  -3   5  -4  135.59   19.70
  -3   5  -4  101.09   26.80
   3  -5   4  161.98   29.70
  -4   5  -4  585.24   50.59
  -4   5  -4  521.25   61.99
   4  -5   4  575.54   62.99
  -5   5  -4  282.67   25.80
  -5   5  -4  254.37   47.00
   5  -5   4  282.97   26.30
   5  -5   4  219.98   38.40
  -6   5  -4  207.58   41.40
   6  -5   4  247.38   39.00
  -7   5  -4  -33.50   16.20
   7  -5   4    5.40   16.40
  -8   5  -4  128.79   38.20
   8  -5   4  103.89   30.20
  -9   5  -4   33.00   30.20
   9  -5   4  -20.00   19.10
 -10   5  -4   66.69   37.30
  10  -5   4   32.60   24.60
 -11   5  -4   -7.50   33.10
  11  -5   4    3.60   23.40
 -12   5  -4   13.40   35.80
  12  -5   4    2.10   25.20
 -13   5  -4   14.40   40.20
  13  -5   4   44.60   35.10
  14   4  -4  -12.00   27.90
  13   4  -4   14.30   33.30
  12   4  -4  -17.30   25.20
  11   4  -4  154.18   42.40
 -11  -4   4  135.89   36.00
  10   4  -4  158.08   41.90
  10   4  -4  136.59   32.50
 -10  -4   4  137.69   35.30
   9   4  -4   53.49   22.90
   9   4  -4   84.69   32.30
  -9  -4   4   80.29   26.70
   8   4  -4   -1.70   17.40
   8   4  -4   10.20   15.90
  -8  -4   4   13.90   16.20
   7   4  -4  100.89   24.30
   7   4  -4   88.09   29.20
  -7  -4   4  169.78   35.70
  -7  -4   4  110.49   25.30
   6   4  -4  447.46   52.69
   6   4  -4  512.55   60.09
  -6  -4   4  510.25   59.09
  -6  -4   4  487.95   50.79
   5   4  -4  369.76   40.10
   5   4  -4  356.86   43.90
  -5  -4   4  371.66   47.70
  -5  -4   4  401.66   40.50
   4   4  -4   52.09   13.10
   4   4  -4   54.49   19.60
  -4  -4   4   22.90   18.50
   3   4  -4  118.79   17.10
   3   4  -4   95.79   22.00
  -3  -4   4   75.19   22.10
   2   4  -4 1094.19   89.19
   2   4  -4 1034.20   94.09
  -2  -4   4  998.40   94.09
   1   4  -4 2186.28  181.78
   1   4  -4 2271.87  184.78
  -1  -4   4 2211.18  185.58
   0   4  -4  491.25   48.30
   0   4  -4  502.95   48.10
   0  -4   4  486.65   50.39
  -1   4  -4  933.01   87.19
  -1   4  -4 1078.89   85.59
   1  -4   4  913.61   89.19
  -2   4  -4  167.08   21.60
  -2   4  -4  144.79   27.20
   2  -4   4  150.58   29.90
  -3   4  -4   34.90   19.90
  -3   4  -4   40.70   10.20
   3  -4   4   60.39   19.30
  -4   4  -4    9.20   16.50
  -4   4  -4   25.30    8.30
   4  -4   4   70.89   27.20
   4  -4   4   30.00    7.90
  -5   4  -4   80.99   26.20
   5  -4   4   51.59   23.00
  -6   4  -4  -12.00   15.10
   6  -4   4   24.20   17.30
  -7   4  -4  281.17   51.09
   7  -4   4  288.87   44.70
  -8   4  -4   71.39   32.50
   8  -4   4  108.59   32.30
  -9   4  -4   -3.20   21.40
   9  -4   4    1.30   20.50
 -10   4  -4   37.50   33.60
  10  -4   4    6.10   24.70
 -11   4  -4   70.69   37.70
  11  -4   4   62.49   33.60
 -12   4  -4   47.20   37.70
  12  -4   4   19.90   32.10
 -13   4  -4    7.60   35.70
  13  -4   4   -6.30   27.90
  14   3  -4  -38.30   29.70
  13   3  -4   22.00   31.90
  12   3  -4  -17.10   24.10
 -12  -3   4   73.79   46.50
  11   3  -4   31.90   30.50
 -11  -3   4   83.79   31.40
  10   3  -4   92.99   35.20
 -10  -3   4  153.08   37.40
   9   3  -4   68.39   24.30
   9   3  -4  101.59   33.00
  -9  -3   4   65.69   28.00
   8   3  -4   24.10   21.70
   8   3  -4   37.90   19.90
  -8  -3   4   51.39   22.10
   7   3  -4    1.30   17.20
   7   3  -4   -6.40   11.60
  -7  -3   4   -1.00   15.40
  -7  -3   4   -1.00   17.50
   6   3  -4  241.78   38.10
   6   3  -4  217.68   30.70
  -6  -3   4  182.58   30.10
  -6  -3   4  185.28   35.80
   5   3  -4  -12.00   13.20
   5   3  -4   15.90   12.70
  -5  -3   4  -11.80   13.40
  -5  -3   4   11.90   12.90
   4   3  -4  101.49   21.30
   4   3  -4  129.99   18.80
  -4  -3   4   65.09   21.70
  -4  -3   4   37.70   14.90
   3   3  -4  349.47   38.70
   3   3  -4  317.37   33.00
  -3  -3   4  308.37   38.30
   2   3  -4  628.94   58.79
   2   3  -4  751.82   63.49
  -2  -3   4  664.63   63.19
   1   3  -4  521.85   43.10
   1   3  -4  422.86   45.00
  -1  -3   4  388.66   45.40
   0   3  -4 4464.45  367.46
   0   3  -4 4491.95  367.26
   0  -3   4 4711.63  369.16
  -1   3  -4 1976.60  148.99
  -1   3  -4 1693.03  151.28
   1  -3   4 1702.73  154.58
  -2   3  -4  762.92   62.09
  -2   3  -4  636.84   67.79
   2  -3   4  718.03   68.39
  -3   3  -4  168.88   32.40
  -3   3  -4  215.98   22.30
   3  -3   4  276.97   33.50
   3  -3   4  222.98   22.30
  -4   3  -4  693.13   75.19
   4  -3   4  832.02   75.79
  -5   3  -4   63.99   22.80
   5  -3   4   41.00   19.00
  -6   3  -4  580.24   69.69
   6  -3   4  698.33   70.29
  -7   3  -4  118.09   33.60
   7  -3   4  144.29   34.10
  -8   3  -4   42.80   23.00
   8  -3   4   11.00   21.40
  -9   3  -4  -16.30   17.80
   9  -3   4   15.70   22.00
 -10   3  -4  -11.00   22.30
  10  -3   4  -41.80   17.10
 -11   3  -4   37.00   28.90
  11  -3   4    1.20   26.00
 -12   3  -4    1.00   27.10
  12  -3   4  -12.80   25.80
 -13   3  -4   10.60   37.40
  13  -3   4   26.40   32.60
  14   2  -4  -12.30   29.90
  13   2  -4   32.70   35.80
  12   2  -4   55.69   33.70
 -12  -2   4   46.50   33.10
  11   2  -4  -11.10   22.70
 -11  -2   4   58.19   30.30
  10   2  -4  -30.50   18.20
 -10  -2   4   42.90   25.30
   9   2  -4   38.00   25.70
   9   2  -4  -16.70   14.50
  -9  -2   4   -3.80   17.90
   8   2  -4    2.30   13.70
   8   2  -4   10.20   19.20
  -8  -2   4   -6.30   14.10
   7   2  -4   45.40   17.20
   7   2  -4   75.19   24.40
  -7  -2   4   44.40   19.60
   6   2  -4   36.20   14.70
   6   2  -4   74.09   22.00
  -6  -2   4   72.69   21.00
  -6  -2   4   65.29   21.70
   5   2  -4  -14.40   12.10
   5   2  -4   -2.80    9.50
  -5  -2   4    5.60   13.80
  -5  -2   4   25.70   17.40
   4   2  -4   24.90   13.60
  -4  -2   4   39.10   14.50
  -4  -2   4   40.40   17.80
   3   2  -4  507.25   52.59
   3   2  -4  562.44   50.69
  -3  -2   4  549.35   51.29
  -3  -2   4  550.84   55.09
   2   2  -4  113.29   17.80
   2   2  -4  142.79   23.10
  -2  -2   4  146.79   23.70
   1   2  -4  281.27   32.40
   1   2  -4  359.26   31.70
  -1  -2   4  257.47   32.90
   0   2  -4  342.47   32.70
   0   2  -4  292.37   32.70
   0  -2   4  306.87   33.40
  -1   2  -4 6949.80  535.95
  -1   2  -4 6733.53  538.55
   1  -2   4 6407.76  540.95
  -2   2  -4   -3.50   12.60
  -2   2  -4    2.70    6.90
   2  -2   4  -17.20   10.90
  -3   2  -4   22.90   17.20
  -3   2  -4   20.60    6.30
   3  -2   4   17.60   13.70
  -4   2  -4  395.36   48.20
   4  -2   4  419.46   47.60
  -5   2  -4  309.27   44.00
   5  -2   4  411.26   50.49
  -6   2  -4  122.19   31.40
   6  -2   4   46.90   21.40
  -7   2  -4   80.09   27.30
   7  -2   4   64.59   24.90
  -8   2  -4   54.29   25.70
   8  -2   4   19.60   22.00
  -9   2  -4  188.78   43.20
   9  -2   4  191.38   46.20
 -10   2  -4  -10.90   23.90
  10  -2   4  -14.80   19.00
 -11   2  -4   20.90   28.80
  11  -2   4    2.10   27.40
 -12   2  -4   -5.60   28.20
  12  -2   4  -41.80   23.20
 -13   2  -4   13.70   33.80
  13  -2   4   37.80   34.20
 -14   2  -4   -3.30   37.50
  14  -2   4   18.20   34.80
  14   1  -4  -11.40   30.60
  13   1  -4   30.30   32.30
 -13  -1   4  -14.80   31.00
  12   1  -4    7.30   29.30
 -12  -1   4    2.40   26.00
  11   1  -4    0.20   23.90
 -11  -1   4   -3.20   21.70
  10   1  -4   79.39   32.20
 -10  -1   4   45.40   27.30
   9   1  -4  -20.70   16.20
   9   1  -4   16.70   16.70
  -9  -1   4   64.69   24.70
   8   1  -4   -4.20   11.70
   8   1  -4    7.40   17.30
  -8  -1   4  -13.80   15.70
   7   1  -4   47.60   18.20
   7   1  -4   53.49   21.20
  -7  -1   4   50.49   22.30
   6   1  -4  129.99   29.10
   6   1  -4  191.58   29.70
  -6  -1   4  212.28   31.70
   5   1  -4   99.69   20.00
   5   1  -4  143.29   26.00
  -5  -1   4   81.69   21.40
  -5  -1   4   73.69   22.30
   4   1  -4   -7.50   10.40
   4   1  -4    7.20   10.00
  -4  -1   4    6.20   12.30
  -4  -1   4   -6.30   11.80
  -3  -1   4   34.60   14.80
  -3  -1   4   21.50   12.40
   2   1  -4  176.48   24.50
  -2  -1   4  248.18   28.00
  -2  -1   4  200.98   25.60
   1   1  -4 4710.33  393.36
  -1  -1   4 5099.39  394.46
   0   1  -4   36.30   12.20
   0  -1   4    9.10    9.40
  -1   1  -4  361.36   34.50
   1  -1   4  288.27   34.90
  -2   1  -4 1802.02  138.79
  -2   1  -4 1589.24  131.49
   2  -1   4 1537.75  137.39
  -3   1  -4    4.40    4.20
  -3   1  -4   26.30   16.10
   3  -1   4   -3.20   12.20
  -4   1  -4  153.88   29.10
   4  -1   4  212.18   33.80
  -5   1  -4   14.30   17.50
   5  -1   4   23.30   20.00
  -6   1  -4  382.06   49.00
   6  -1   4  418.36   52.79
  -7   1  -4   19.70   21.10
   7  -1   4   17.10   20.00
  -8   1  -4   14.90   21.40
   8  -1   4   53.79   25.90
  -9   1  -4   11.70   23.80
   9  -1   4   11.30   24.90
 -10   1  -4   16.20   26.90
  10  -1   4   63.19   33.80
 -11   1  -4   49.40   31.00
  11  -1   4   99.69   40.70
 -12   1  -4  203.78   51.39
  12  -1   4   81.49   38.40
 -13   1  -4   55.99   40.70
  13  -1   4   13.50   34.10
 -14   1  -4  -27.70   31.00
  14  -1   4  -46.10   29.90
  13   0  -4   20.20   32.60
 -13   0   4  -31.10   24.60
  12   0  -4  166.08   49.00
 -12   0   4  101.29   39.20
  11   0  -4   -6.70   24.80
 -11   0   4   25.70   26.50
  10   0  -4  128.19   37.00
 -10   0   4  101.09   34.50
   9   0  -4   -3.60   18.50
   9   0  -4   15.10   14.50
  -9   0   4  -11.30   18.50
   8   0  -4   62.59   18.20
   8   0  -4    9.10   19.80
  -8   0   4   25.70   22.10
   7   0  -4  530.15   54.49
   7   0  -4  569.04   61.39
  -7   0   4  459.25   59.09
   6   0  -4  208.58   34.80
   6   0  -4  232.88   31.50
  -6   0   4  283.57   36.70
   5   0  -4   30.60   15.40
  -5   0   4   26.90   17.70
   4   0  -4    7.20   12.40
  -4   0   4   -7.30   12.60
  -4   0   4   17.00   13.90
  -3   0   4  -11.50   10.40
  -3   0   4    3.40   11.50
   2   0  -4 1327.67  114.49
  -2   0   4 1323.57  115.09
  -2   0   4 1395.96  113.59
   1   0  -4 2651.53  212.48
  -1   0   4 2569.64  211.38
   0   0  -4 1490.45  123.59
   0   0   4 1486.05  123.39
  -1   0  -4  777.62   68.09
  -1   0  -4  757.92   65.69
   1   0   4  810.42   68.59
  -2   0  -4 1143.29   94.19
   2   0   4 1243.18  100.19
   2   0   4 1108.69   93.99
  -3   0  -4  307.27   36.40
  -3   0  -4  324.07   27.20
   3   0   4  335.97   38.90
   3   0   4  279.97   26.60
  -4   0  -4  432.86   49.20
   4   0   4  478.15   51.89
  -5   0  -4   89.79   26.00
   5   0   4   84.49   22.40
  -6   0  -4 1169.98  105.89
   6   0   4 1077.29  107.59
  -7   0  -4   57.69   22.20
   7   0   4  105.69   28.70
  -8   0  -4  -27.50   15.80
   8   0   4   -9.90   18.30
  -9   0  -4   54.39   28.90
   9   0   4   99.09   33.90
 -10   0  -4  217.88   46.70
  10   0   4  202.68   50.69
 -11   0  -4    8.50   24.30
  11   0   4  -18.10   23.40
 -12   0  -4   31.20   26.90
  12   0   4   53.49   36.60
 -13   0  -4    6.00   30.20
  13   0   4  -35.10   27.60
 -14   0  -4   19.40   35.70
  14   0   4  -12.10   31.20
 -14   1   4  -38.40   32.30
  13  -1  -4    7.90   39.70
 -13   1   4  -23.90   25.80
  12  -1  -4  -16.70   25.00
 -12   1   4  -10.10   26.30
  11  -1  -4   62.19   31.00
 -11   1   4    7.50   26.40
  10  -1  -4   16.00   22.20
 -10   1   4  -12.20   20.10
   9  -1  -4   84.59   29.90
  -9   1   4   97.19   33.30
   8  -1  -4    0.00   15.90
   8  -1  -4    5.50   13.60
  -8   1   4  -23.70   15.40
   7  -1  -4   64.99   17.90
   7  -1  -4   83.89   24.50
  -7   1   4   63.99   25.10
   6  -1  -4  237.38   36.30
  -6   1   4  278.97   38.60
   5  -1  -4  298.67   36.80
  -5   1   4  222.18   36.80
   4  -1  -4   -5.70   11.60
  -4   1   4   -7.20   12.70
   3  -1  -4  114.89   20.10
  -3   1   4   95.99   18.60
  -3   1   4  110.29   22.50
  -2   1   4  608.34   56.69
  -2   1   4  592.04   53.49
   1  -1  -4   14.20   10.90
   1  -1  -4   33.20    7.80
  -1   1   4    4.20   12.40
  -1   1   4   35.00   11.90
  -1   1   4   30.00    8.50
   0  -1  -4  278.07   27.30
   0  -1  -4  280.77   28.40
   0   1   4  266.57   28.30
   0   1   4  267.87   27.80
  -1  -1  -4  504.95   42.60
   1   1   4  446.56   40.20
   1   1   4  393.36   41.20
  -2  -1  -4 4636.34  371.06
   2   1   4 4450.45  367.66
   2   1   4 4741.53  372.36
  -3  -1  -4   88.89   18.90
   3   1   4   77.09   20.20
   3   1   4   74.59   12.10
  -4  -1  -4 1603.14  133.79
  -4  -1  -4 1734.63  141.89
   4   1   4 1591.54  143.79
   4   1   4 1687.93  133.79
  -5  -1  -4   51.09   19.40
  -5  -1  -4   40.10    8.90
   5   1   4   48.80   21.40
   5   1   4   60.59    9.60
  -6  -1  -4   97.89   24.60
   6   1   4   49.70   23.00
   6   1   4   86.49   11.50
  -7  -1  -4   34.90   20.20
   7   1   4   99.19   28.90
  -8  -1  -4   89.79   28.30
   8   1   4  153.68   37.30
  -9  -1  -4   16.20   20.70
   9   1   4   -1.80   20.70
 -10  -1  -4   30.60   27.40
  10   1   4  101.99   37.50
 -11  -1  -4   16.30   25.10
  11   1   4  -27.60   23.50
 -12  -1  -4   65.49   33.50
  12   1   4  115.39   42.80
 -13  -1  -4    3.90   27.70
  13   1   4   38.50   36.50
  14   1   4  -20.60   34.20
 -13   2   4  -17.40   25.40
  12  -2  -4  -40.50   22.50
 -12   2   4  -22.20   26.70
  11  -2  -4    8.30   23.50
 -11   2   4   15.40   25.10
  10  -2  -4   48.20   28.10
 -10   2   4    7.20   21.70
   9  -2  -4   19.40   23.90
  -9   2   4   -9.80   21.60
   8  -2  -4   38.30   20.30
   8  -2  -4   14.40   14.40
  -8   2   4   44.80   26.10
   7  -2  -4  277.87   41.40
  -7   2   4  274.97   46.80
   6  -2  -4 1078.59   95.19
  -6   2   4  900.01   95.49
   5  -2  -4  314.97   38.70
  -5   2   4  311.37   41.10
   4  -2  -4   10.80   12.20
  -4   2   4   18.70   15.50
   3  -2  -4   49.20   13.90
  -3   2   4   51.19   17.80
   2  -2  -4  349.77   36.70
   2  -2  -4  383.06   38.00
  -2   2   4  355.66   41.20
  -2   2   4  389.66   36.60
  -2   2   4  482.15   40.60
   1  -2  -4 3318.77  267.27
   1  -2  -4 3286.97  262.87
  -1   2   4 3230.48  267.57
  -1   2   4 3296.67  266.37
  -1   2   4 3296.17  262.87
   0  -2  -4 2796.42  212.78
   0  -2  -4 2692.13  215.68
   0   2   4 2444.16  212.98
   0   2   4 2682.53  215.38
  -1  -2  -4 2582.44  208.18
   1   2   4 2593.64  207.88
   1   2   4 2504.25  207.88
  -2  -2  -4 1346.27  115.49
   2   2   4 1398.56  117.49
   2   2   4 1392.36  114.29
  -3  -2  -4   56.49   15.20
   3   2   4   37.10   11.20
   3   2   4   12.30   14.30
  -4  -2  -4 1167.88  101.69
   4   2   4 1166.38   96.79
   4   2   4 1143.89  105.69
  -5  -2  -4 2867.91  236.38
   5   2   4 2726.53  240.68
   5   2   4 2901.01  230.08
  -6  -2  -4   38.50   19.50
   6   2   4   83.69   28.10
   6   2   4   65.99   12.40
  -7  -2  -4  406.86   47.40
   7   2   4  355.26   34.70
   7   2   4  327.97   50.69
  -8  -2  -4   33.80   16.80
   8   2   4   18.80   22.60
   8   2   4   24.90   11.30
  -9  -2  -4  137.69   33.40
   9   2   4   83.09   34.60
 -10  -2  -4   83.09   32.80
  10   2   4   63.19   31.70
 -11  -2  -4   -4.30   22.10
  11   2   4   27.50   29.10
 -12  -2  -4    4.00   22.80
  12   2   4   25.00   33.50
 -13  -2  -4   17.80   29.70
  13   2   4   29.00   34.30
  14   2   4  -10.60   34.30
 -13   3   4   78.49   42.20
 -12   3   4   12.20   31.00
  11  -3  -4   -1.50   23.70
 -11   3   4   58.19   32.10
  10  -3  -4   22.20   23.30
 -10   3   4   25.30   30.90
   9  -3  -4  -17.70   16.90
  -9   3   4   29.50   23.20
   8  -3  -4   -7.60   15.40
  -8   3   4   30.40   24.30
   7  -3  -4   -7.10   15.90
  -7   3   4    2.30   19.80
   6  -3  -4  865.41   87.19
  -6   3   4 1002.90   94.79
   5  -3  -4  658.53   60.89
  -5   3   4  522.55   63.09
   4  -3  -4   45.60   14.80
  -4   3   4   22.90   16.20
   3  -3  -4  354.46   34.30
  -3   3   4  307.47   39.40
  -3   3   4  293.67   35.80
   2  -3  -4  154.48   18.90
   2  -3  -4  152.98   18.70
  -2   3   4  173.88   28.20
  -2   3   4  177.08   24.50
  -1   3   4  173.98   25.10
  -1   3   4  161.38   24.40
   0  -3  -4  881.81   82.99
   0  -3  -4 1105.29   79.39
   0   3   4  844.02   83.29
   0   3   4  915.51   83.39
   0   3   4  980.30   79.09
  -1  -3  -4   14.10   10.50
   1   3   4   51.49   12.00
   1   3   4   17.40   12.10
  -2  -3  -4  839.62   79.89
   2   3   4  958.50   81.49
   2   3   4 1055.49   83.69
  -3  -3  -4  172.08   23.70
   3   3   4  175.78   23.20
   3   3   4  188.78   29.60
  -4  -3  -4   21.50   13.60
   4   3   4   27.60   17.50
   4   3   4   21.00   10.70
  -5  -3  -4  207.08   31.00
   5   3   4  195.28   35.80
   5   3   4  204.88   24.50
  -6  -3  -4  867.91   82.09
   6   3   4  872.71   76.09
   6   3   4  881.41   88.89
  -7  -3  -4   56.19   21.50
   7   3   4   69.29   14.60
   7   3   4   47.30   23.70
  -8  -3  -4   15.40   16.20
   8   3   4   12.30   10.20
   8   3   4    4.50   22.70
  -9  -3  -4   19.00   17.70
   9   3   4  -10.30   21.20
 -10  -3  -4  -10.20   18.90
  10   3   4  -25.20   19.70
 -11  -3  -4   10.60   21.70
  11   3   4  -16.40   26.80
 -12  -3  -4   12.00   26.50
  12   3   4   39.00   35.60
  13   3   4    5.50   30.40
  14   3   4  -25.60   33.00
 -13   4   4   38.80   36.10
 -12   4   4   -8.80   26.40
 -11   4   4   -1.40   29.10
  10  -4  -4   -9.00   19.70
 -10   4   4    1.30   27.50
   9  -4  -4   56.99   26.40
  -9   4   4   36.00   26.70
   8  -4  -4   49.40   20.70
  -8   4   4   31.50   26.80
   7  -4  -4    2.00   15.60
  -7   4   4   14.00   20.30
   6  -4  -4  114.19   25.60
  -6   4   4   52.19   24.70
   5  -4  -4  289.67   36.80
  -5   4   4  307.97   43.00
   4  -4  -4   46.10   14.90
  -4   4   4   40.60   20.60
  -4   4   4   53.39   16.30
   3  -4  -4  707.73   61.19
  -3   4   4  674.83   64.29
  -3   4   4  660.13   68.19
   2  -4  -4 1283.17  105.19
   2  -4  -4 1393.56  105.39
  -2   4   4 1245.88  110.39
  -2   4   4 1114.69  111.99
  -1   4   4  664.73   59.19
  -1   4   4  581.14   59.79
   0  -4  -4 1013.10   90.59
   0   4   4 1072.09   85.49
   0   4   4 1057.19   91.49
   0   4   4 1071.69   85.59
   0   4   4  998.40   91.79
  -1  -4  -4  198.18   25.30
   1   4   4  198.88   24.20
   1   4   4  222.48   27.40
  -2  -4  -4 3673.73  294.77
   2   4   4 3584.94  296.67
   2   4   4 3702.93  296.97
  -3  -4  -4  224.88   27.00
   3   4   4  229.88   29.70
   3   4   4  319.47   34.90
  -4  -4  -4  212.68   24.40
   4   4   4  135.69   28.60
   4   4   4  150.98   23.80
  -5  -4  -4 1322.47  118.89
   5   4   4 1395.86  117.69
   5   4   4 1460.35  126.99
  -6  -4  -4  223.78   30.40
   6   4   4  197.18   26.90
   6   4   4  253.47   41.60
  -7  -4  -4  122.99   26.50
   7   4   4  199.98   24.40
   7   4   4  179.08   36.70
  -8  -4  -4   14.60   16.90
   8   4   4    8.80   11.10
   8   4   4    8.30   18.70
  -9  -4  -4   14.00   18.70
   9   4   4  -18.00   22.30
 -10  -4  -4   88.19   27.20
  10   4   4  -15.90   25.00
 -11  -4  -4  148.19   39.00
  11   4   4  180.98   50.09
 -12  -4  -4   21.50   29.60
  12   4   4   13.70   33.80
  13   4   4  -46.10   29.70
  14   4   4   22.60   38.00
 -13   5   4   92.49   44.40
 -12   5   4  -21.90   31.50
 -11   5   4  -14.20   24.80
 -10   5   4   10.20   29.00
   9  -5  -4    7.40   18.70
  -9   5   4  -18.80   21.00
   8  -5  -4   31.00   19.30
  -8   5   4    1.60   24.80
   7  -5  -4  227.68   37.90
  -7   5   4  258.07   48.50
   6  -5  -4    1.00   13.70
  -6   5   4  -10.30   19.90
   5  -5  -4  569.84   53.19
  -5   5   4  524.95   53.29
  -5   5   4  400.46   58.79
   4  -5  -4  145.59   22.80
  -4   5   4  126.19   23.40
  -4   5   4  169.08   33.00
   3  -5  -4  282.27   31.70
  -3   5   4  388.46   43.00
  -3   5   4  328.67   36.60
   2  -5  -4  333.57   28.00
   2  -5  -4  250.07   27.00
  -2   5   4  309.17   27.90
  -2   5   4  364.76   39.40
  -2   5   4  305.87   34.90
  -1   5   4    6.60   13.60
  -1   5   4    1.20   11.60
   0   5   4  464.15   38.40
   0   5   4  526.65   47.70
   0   5   4  429.76   38.60
   0   5   4  420.56   45.30
  -1  -5  -4  371.86   35.40
   1   5   4  315.27   34.90
   1   5   4  290.57   38.30
   1   5   4  370.16   34.20
  -2  -5  -4 1767.72  142.99
   2   5   4 1791.42  146.79
   2   5   4 1657.23  145.29
  -3  -5  -4  230.58   22.60
   3   5   4  196.38   28.10
   3   5   4  113.09   25.50
  -4  -5  -4   89.89   16.40
   4   5   4   96.69   19.00
   4   5   4   66.99   20.60
  -5  -5  -4   -1.80   11.30
   5   5   4   33.00   17.00
   5   5   4   -0.30   11.10
  -6  -5  -4  648.74   58.49
   6   5   4  610.84   67.59
   6   5   4  539.05   56.79
  -7  -5  -4  141.49   26.20
   7   5   4  109.09   28.80
   7   5   4   83.39   19.80
  -8  -5  -4  -18.30   13.10
   8   5   4   -0.80    8.40
   8   5   4    7.50   21.50
  -9  -5  -4    4.10   18.00
   9   5   4  -11.70   19.50
   9   5   4    4.30   13.80
 -10  -5  -4  -18.90   17.00
  10   5   4  -13.10   21.10
 -11  -5  -4   57.69   27.10
  11   5   4   66.29   38.50
  12   5   4  -20.50   29.10
  13   5   4   68.69   43.00
  14   5   4   -5.70   30.80
 -13   6   4   17.80   36.70
 -12   6   4    5.50   36.40
 -11   6   4   33.10   31.30
 -10   6   4    1.00   26.80
   9  -6  -4    7.20   23.90
  -9   6   4   48.10   31.90
   8  -6  -4   21.80   19.70
  -8   6   4   21.80   27.10
   7  -6  -4   -1.40   14.70
  -7   6   4   29.10   23.40
   6  -6  -4   14.70   14.40
  -6   6   4    2.20   18.30
   5  -6  -4  165.18   27.80
  -5   6   4  218.58   30.40
  -5   6   4  223.88   41.80
   4  -6  -4   57.99   14.90
  -4   6   4   50.29   17.30
  -4   6   4   42.90   19.50
  -3   6   4   49.99   20.30
  -3   6   4    6.50   13.60
   2  -6  -4 1001.20   89.79
  -2   6   4 1109.29   99.49
  -2   6   4 1134.19   96.99
  -2   6   4 1116.69   88.79
  -1   6   4  341.87   42.00
  -1   6   4  382.76   41.50
   0  -6  -4   29.20    8.30
   0   6   4   29.40    7.40
   0   6   4   44.70    9.40
   0   6   4   56.89   17.20
   0   6   4   25.70   16.90
  -1  -6  -4  346.27   38.10
  -1  -6  -4  396.86   37.40
   1   6   4  343.17   41.00
   1   6   4  359.56   38.20
   1   6   4  443.86   38.30
  -2  -6  -4   62.39   13.80
   2   6   4  133.49   23.30
   2   6   4   55.49   16.40
  -3  -6  -4    2.20    8.10
   3   6   4   21.00   14.10
   3   6   4    2.90   12.00
  -4  -6  -4  580.64   51.29
   4   6   4  523.05   59.79
   4   6   4  599.24   57.29
  -5  -6  -4   -3.10    8.30
   5   6   4  -11.90   11.20
   5   6   4   22.30   16.30
  -6  -6  -4  723.23   67.99
   6   6   4  788.12   80.19
   6   6   4  750.62   70.99
  -7  -6  -4  283.17   36.80
   7   6   4  373.16   39.80
   7   6   4  329.57   49.90
  -8  -6  -4   82.49   23.30
   8   6   4  132.19   36.90
   8   6   4  124.99   24.70
  -9  -6  -4   -1.70   14.50
   9   6   4   24.40   15.60
   9   6   4   47.90   27.90
 -10  -6  -4  -12.70   16.40
  10   6   4   42.20   27.90
  11   6   4  196.68   51.89
  12   6   4   -7.70   29.20
  13   6   4  -12.50   33.90
  14   6   4    9.90   37.50
 -12   7   4  -15.30   28.80
 -11   7   4  -19.90   32.60
 -10   7   4   -0.20   31.30
  -9   7   4    0.70   27.90
   8  -7  -4   21.70   18.40
  -8   7   4   11.20   24.00
   7  -7  -4  108.49   24.60
  -7   7   4   97.99   34.00
   6  -7  -4  106.29   23.60
  -6   7   4  102.69   25.10
  -6   7   4   88.79   32.40
   5  -7  -4   13.40   10.90
  -5   7   4  -27.40   13.10
  -5   7   4    4.20   12.60
   4  -7  -4   41.20   12.80
  -4   7   4   -4.10   16.60
  -4   7   4   15.70   14.90
   3  -7  -4  134.89   19.00
  -3   7   4   92.89   22.60
  -3   7   4   96.99   27.30
   2  -7  -4  607.74   54.19
  -2   7   4  704.73   66.09
  -2   7   4  644.64   54.09
  -2   7   4  563.14   65.69
   1  -7  -4  378.86   31.30
  -1   7   4  286.57   40.10
  -1   7   4  335.17   42.20
  -1   7   4  341.27   31.10
   0  -7  -4   73.19   12.10
   0   7   4   58.79   10.90
   0   7   4   91.79   19.40
   0   7   4   39.90   19.50
  -1  -7  -4   35.00   11.80
  -1  -7  -4   23.70   11.90
   1   7   4   21.90   11.70
   1   7   4   14.90   12.00
   1   7   4   20.80   16.40
  -2  -7  -4  388.46   41.00
  -2  -7  -4  395.86   37.30
   2   7   4  337.27   40.60
  -3  -7  -4  -15.50    7.30
   3   7   4   -4.50   14.00
   3   7   4  -11.50   11.90
  -4  -7  -4  550.54   52.09
   4   7   4  583.84   61.09
   4   7   4  569.54   57.99
  -5  -7  -4    3.70    7.90
   5   7   4   12.00   14.10
   5   7   4  -12.50   15.00
  -6  -7  -4  244.68   29.30
   6   7   4  341.97   45.10
   6   7   4  250.47   34.90
  -7  -7  -4   62.29   15.70
   7   7   4   10.30   19.80
   7   7   4   29.80   15.10
  -8  -7  -4   38.10   17.10
   8   7   4   23.50   25.10
   8   7   4   24.00   15.90
  -9  -7  -4  -10.80   13.00
   9   7   4   12.90   14.50
   9   7   4   -1.70   25.40
  10   7   4  300.17   62.99
  11   7   4   39.10   30.50
  12   7   4   17.00   30.50
  13   7   4  -51.49   25.00
  14   7   4   19.60   44.10
 -12   8   4   16.60   34.10
 -11   8   4   19.50   37.60
 -10   8   4  -28.30   27.30
  -9   8   4   -8.00   27.30
  -8   8   4   -2.00   22.20
   7  -8  -4   54.69   22.30
  -7   8   4   52.09   30.00
   6  -8  -4   23.20   14.10
  -6   8   4    0.70   12.80
  -6   8   4    7.90   22.80
   5  -8  -4   36.00   14.40
  -5   8   4    0.30   18.10
  -5   8   4    1.40   14.40
   4  -8  -4   -6.90    9.90
  -4   8   4    3.80   18.10
  -4   8   4    9.30   13.90
   3  -8  -4   69.99   16.20
  -3   8   4   42.10   23.20
  -3   8   4   63.59   20.90
   2  -8  -4  420.36   38.50
  -2   8   4  455.65   50.79
  -2   8   4  389.16   46.90
   1  -8  -4   35.10    9.30
  -1   8   4   70.59   25.20
  -1   8   4   63.49   15.60
  -1   8   4   43.00   19.20
   0  -8  -4    4.30    8.20
   0   8   4   -3.90   11.70
   0   8   4    9.10   16.40
  -1  -8  -4   18.10   10.90
   1   8   4    8.90   11.80
   1   8   4    7.80   13.20
   1   8   4   13.40   12.50
  -2  -8  -4   18.10   12.90
  -2  -8  -4   42.40   13.00
   2   8   4   42.60   13.40
   2   8   4   16.00   18.20
   2   8   4   10.10   13.60
  -3  -8  -4    3.50    9.20
  -3  -8  -4   -1.30   13.20
   3   8   4   15.20   16.40
   3   8   4   26.90   15.60
  -4  -8  -4  103.49   16.30
   4   8   4  207.08   33.00
   4   8   4  104.69   26.30
  -5  -8  -4    1.10    7.00
   5   8   4    2.00   14.40
   5   8   4   -8.00   14.20
  -6  -8  -4   17.40    9.00
   6   8   4  -43.60   13.20
   6   8   4   31.60   15.60
  -7  -8  -4    8.50   10.20
   7   8   4   20.30   16.20
   7   8   4  -12.90   16.90
  -8  -8  -4   88.49   20.10
   8   8   4   59.09   21.30
   8   8   4   65.19   29.20
  -9  -8  -4  119.89   25.60
   9   8   4  136.19   28.90
   9   8   4  109.89   38.70
  10   8   4  140.99   43.50
  11   8   4   10.00   31.00
  12   8   4  -26.50   29.10
  13   8   4  -19.10   36.20
  14   8   4  -15.10   32.50
 -12   9   4  -14.90   37.40
 -11   9   4   22.90   35.70
 -10   9   4   15.20   34.20
  -9   9   4  -26.40   25.40
  -8   9   4  -56.39   20.50
  -7   9   4   19.00   17.80
  -7   9   4    5.00   28.00
   6  -9  -4  -13.70   13.90
  -6   9   4   13.30   23.60
  -6   9   4    6.30   14.70
   5  -9  -4   42.40   16.70
  -5   9   4   79.29   21.90
  -5   9   4   31.00   23.30
   4  -9  -4  -22.90   11.80
  -4   9   4   15.00   19.70
  -4   9   4  -10.00   12.90
   3  -9  -4  328.87   34.70
  -3   9   4  360.16   48.60
  -3   9   4  333.27   42.00
   2  -9  -4  233.28   28.70
  -2   9   4  421.86   45.90
  -2   9   4  334.07   40.60
   1  -9  -4  622.74   54.79
  -1   9   4  570.84   63.89
  -1   9   4  681.73   65.19
   0  -9  -4  -20.70    7.90
   0   9   4   -2.40   13.10
   0   9   4   19.90   20.00
  -1  -9  -4   94.49   18.00
   1   9   4   57.39   23.40
   1   9   4   97.99   20.10
  -2  -9  -4   -4.30   11.40
  -2  -9  -4  -17.60    9.00
   2   9   4  -21.50   16.20
   2   9   4   -8.70    8.70
   2   9   4    7.90   13.90
  -3  -9  -4   18.60   10.20
  -3  -9  -4   29.60   14.70
   3   9   4   54.99   26.30
   3   9   4   10.40   15.80
  -4  -9  -4 2166.08  180.08
  -4  -9  -4 1977.10  168.28
   4   9   4 2185.58  179.98
   4   9   4 2071.69  179.88
  -5  -9  -4   22.70    7.50
  -5  -9  -4    4.80    6.40
   5   9   4   -4.30   16.90
   5   9   4   13.20    7.20
   5   9   4   64.19   20.10
  -6  -9  -4  -10.30    6.00
   6   9   4   13.00   14.10
   6   9   4    2.80   16.70
  -7  -9  -4    1.00    9.10
   7   9   4   -9.70   14.90
   7   9   4  -20.60   18.10
  -8  -9  -4    0.50   10.20
   8   9   4   -7.20   13.60
   8   9   4   11.30   21.00
   9   9   4    1.70   16.40
   9   9   4    4.30   24.80
  10   9   4  338.57   46.40
  10   9   4  262.07   60.19
  11   9   4    6.20   26.20
  12   9   4   65.09   40.10
  13   9   4   -1.60   35.40
  14   9   4  -26.30   38.60
 -11  10   4    9.00   36.00
 -10  10   4   41.50   39.10
  -9  10   4   40.70   37.20
  -8  10   4  -13.60   25.10
  -7  10   4  139.59   39.90
  -6  10   4   67.09   24.80
  -6  10   4   62.89   31.30
   5 -10  -4   44.40   35.20
  -5  10   4   48.90   29.40
  -5  10   4   92.59   23.50
   4 -10  -4  -11.10   10.80
  -4  10   4  -39.80   15.90
  -4  10   4    2.70   13.80
   3 -10  -4  121.09   18.80
  -3  10   4   65.29   23.60
  -3  10   4   84.89   27.20
   2 -10  -4  165.78   20.30
  -2  10   4  128.89   32.00
  -2  10   4  125.59   27.80
[truncated: 2,068,750 more chars]
